# Supplementary material for: The ancestral flower of angiosperms and its early diversification
Source: Nat Commun. 2017 Aug 1;8:16047. doi: 10.1038/ncomms16047 (PMC5543309; doi:10.1038/ncomms16047)

ancestral state reconstruction using ancestral.pars  
(phangorn)

1. A. Functional sex of flowers (D2d), 97 steps

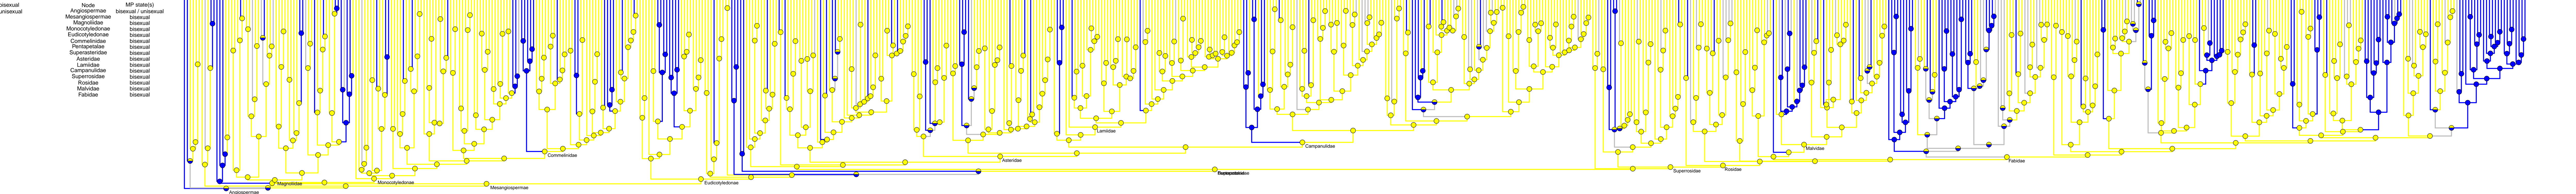

00\_A. Functional sex of flowers (D2d), ARDeq model

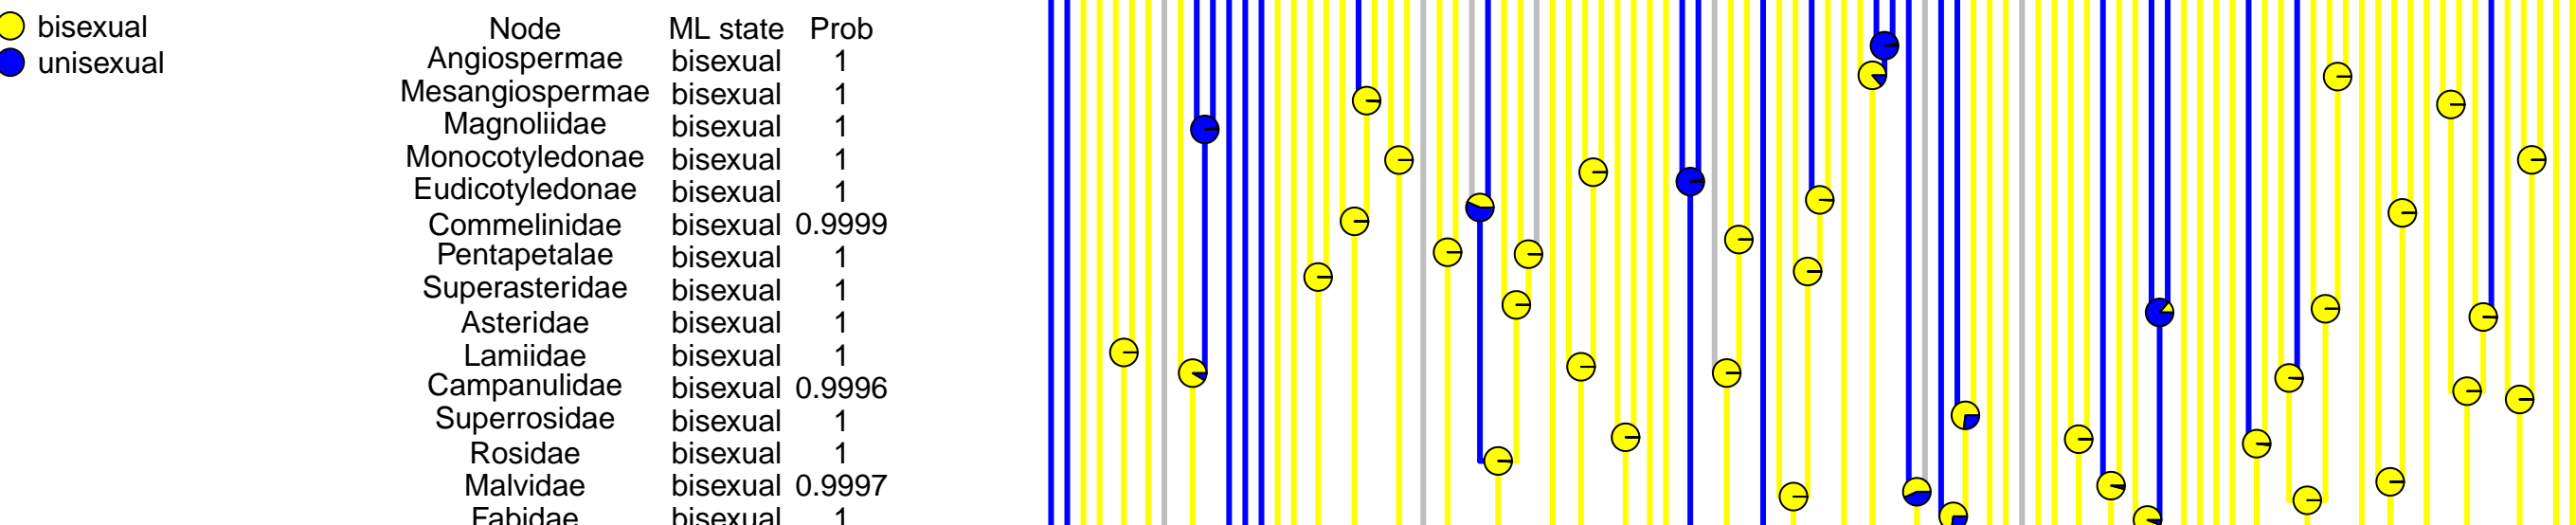

| Model  | LogL    | Npar | AIC    | AICc   | DeltaAICc | w    | q01    | q10    |
|--------|---------|------|--------|--------|-----------|------|--------|--------|
| ARD    | -313.25 | 2    | 630.5  | 630.52 | 1.38      | 0.23 | 0.003  | 7e-04  |
| ARDeq* | -312.56 | 2    | 629.12 | 629.14 | 0         | 0.46 | 0.003  | 7e-04  |
| ER     | -316.07 | 1    | 634.13 | 634.14 | 5         | 0.04 | 0.0029 | 0.0029 |
| UNI01  | -314.06 | 1    | 630.12 | 630.12 | 0.99      | 0.28 | 0.003  |        |
| UNI10  | -354.64 | 1    | 711.27 | 711.28 | 82.14     | 0    |        | 0.0118 |

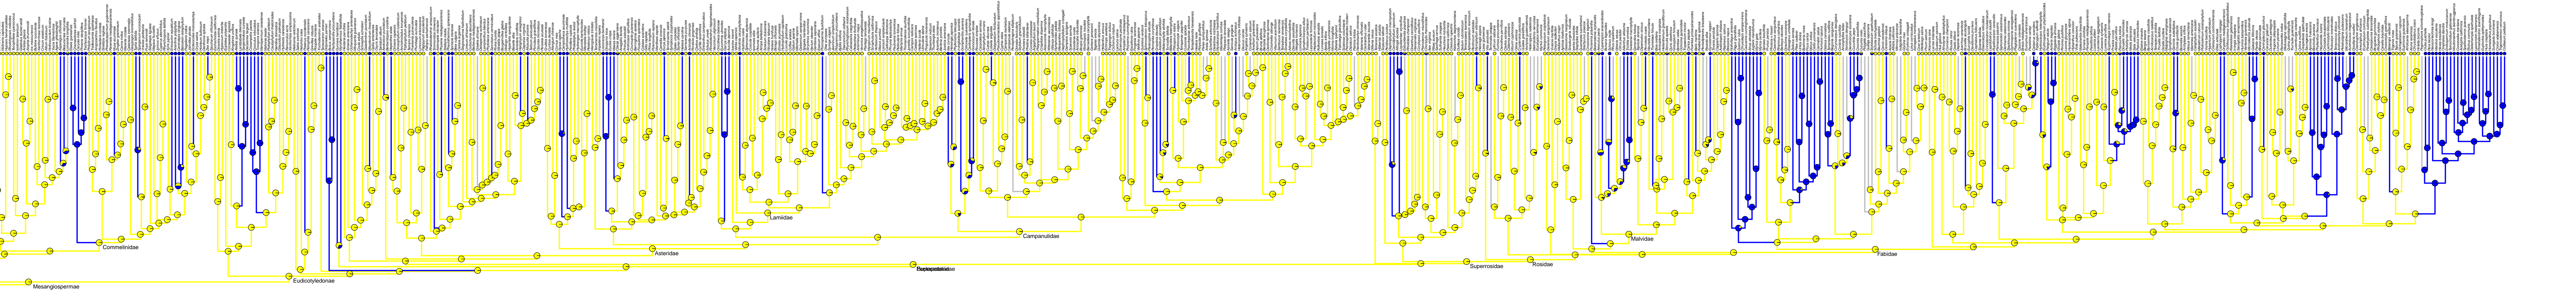



ML ancestral state reconstruction using rayDISC (R:corHMM)  
100\_B. Structural sex of flowers (D2d), ARDeq model

● bisexual  
● unisexual

| Node            | ML state | Prob   |
|-----------------|----------|--------|
| Angiospermae    | bisexual | 1      |
| Mesangiospermae | bisexual | 1      |
| Magnoliidae     | bisexual | 1      |
| Monocotyledonae | bisexual | 1      |
| Eudicotyledonae | bisexual | 1      |
| Commelinidae    | bisexual | 1      |
| Pentapetales    | bisexual | 1      |
| Superasteridae  | bisexual | 1      |
| Asteridae       | bisexual | 1      |
| Lamiidae        | bisexual | 0.9999 |
| Campanulidae    | bisexual | 1      |
| Superrosidae    | bisexual | 1      |
| Rosidae         | bisexual | 1      |
| Malvidae        | bisexual | 1      |
| Fabidae         | bisexual | 0.9975 |

| Model   | LogL    | Npar | AIC    | AICc   | DeltaAICc | w    | q01    | q10    |
|---------|---------|------|--------|--------|-----------|------|--------|--------|
| ARD     | -209.05 | 2    | 422.1  | 422.11 | 1.36      | 0.28 | 0.0015 | 0.004  |
| ARDeq** | -208.37 | 2    | 420.74 | 420.75 | 0         | 0.56 | 0.0015 | 0.004  |
| ER      | -210.62 | 1    | 423.23 | 423.24 | 2.48      | 0.16 | 0.0016 | 0.0016 |
| UNI01   | -223.81 | 1    | 449.61 | 449.62 | 28.87     | 0    | 0.0017 |        |
| UNI10   | -230.41 | 1    | 462.81 | 462.82 | 42.06     | 0    |        | 0.0165 |

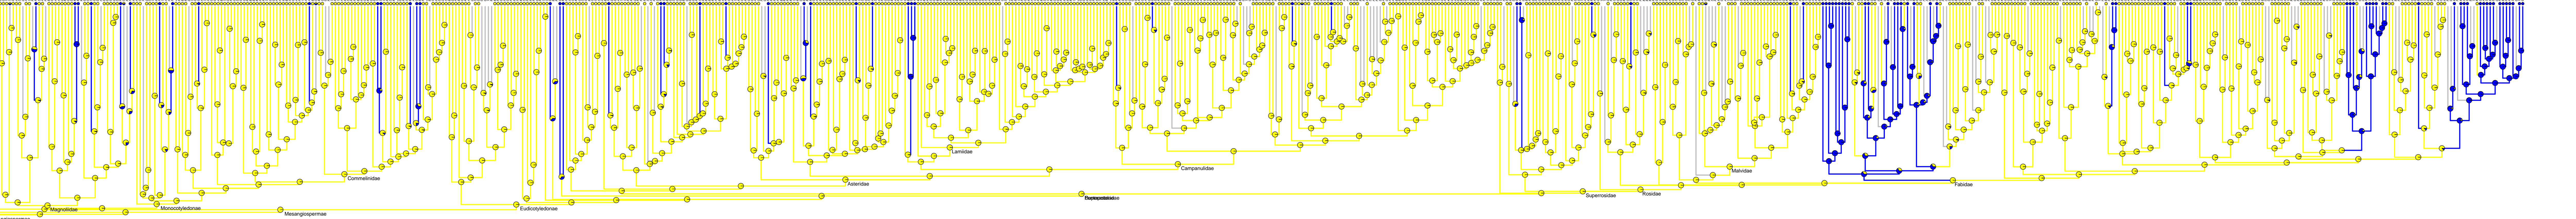



ML ancestral state reconstruction using rayDISC (R:corHMM)  
102\_B. Ovary position (binary) (D2d), ARDeq model

● superior  
● inferior

| Node            | ML state | Prob   |
|-----------------|----------|--------|
| Angiospermae    | superior | 1      |
| Mesangiospermae | superior | 1      |
| Magnoliidae     | superior | 0.9999 |
| Monocotyledonae | superior | 0.9994 |
| Eudicotyledonae | superior | 1      |
| Commelinidae    | superior | 0.8973 |
| Pentapetales    | superior | 1      |
| Superasteridae  | superior | 1      |
| Asteridae       | superior | 0.9873 |
| Lamiidae        | superior | 0.9886 |
| Campanulidae    | superior | 0.8484 |
| Superrosidae    | superior | 0.9952 |
| Rosidae         | superior | 0.9951 |
| Malvidae        | superior | 0.9999 |
| Fabidae         | superior | 0.9999 |

| Model  | LogL    | Npar | AIC    | AICc   | DeltaAICc | w    | q01    | q10    |
|--------|---------|------|--------|--------|-----------|------|--------|--------|
| ARD    | -271.35 | 2    | 546.71 | 546.72 | 1.38      | 0.21 | 0.0022 | 0.0032 |
| ARDeq* | -270.66 | 2    | 545.32 | 545.47 | 0         | 0.41 | 0.0022 | 0.0032 |
| ER     | -271.73 | 1    | 545.46 | 545.47 | 0.13      | 0.38 | 0.0023 | 0.0023 |
| UNI01  | -280.69 | 1    | 563.39 | 563.39 | 18.05     | 0    | 0.0027 |        |
| UNI10  | -294.17 | 1    | 590.34 | 590.34 | 45        | 0    | 0.0098 |        |

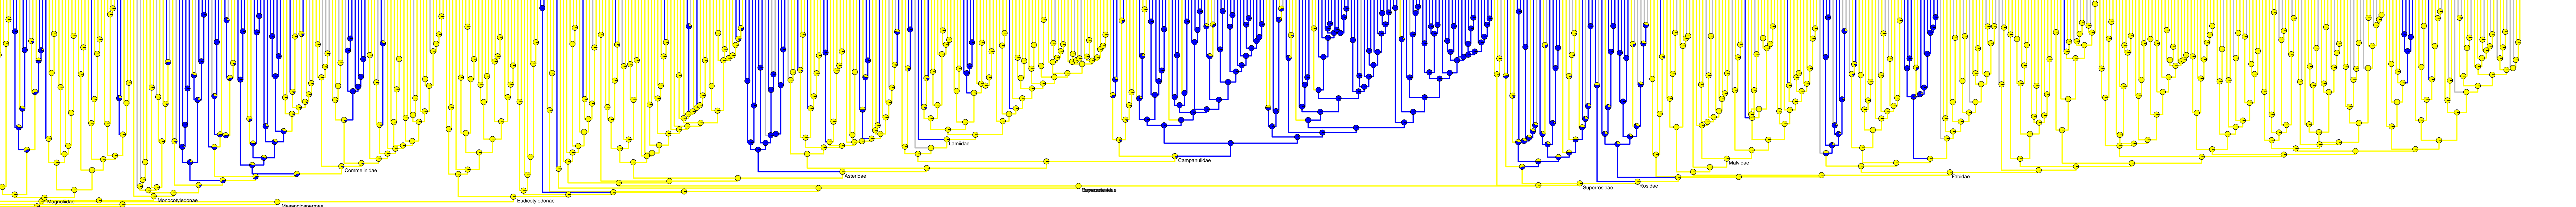





B. Number of perianth parts (3) (state) (D3a) 86 stamens

1  
 2  
 3  
 4  
 5  
 6  
 7  
 8  
 9  
 10  
 11  
 12  
 13  
 14  
 15  
 16  
 17  
 18  
 19  
 20  
 21  
 22  
 23  
 24  
 25  
 26  
 27  
 28  
 29  
 30  
 31  
 32  
 33  
 34  
 35  
 36  
 37  
 38  
 39  
 40  
 41  
 42  
 43  
 44  
 45  
 46  
 47  
 48  
 49  
 50  
 51  
 52  
 53  
 54  
 55  
 56  
 57  
 58  
 59  
 60  
 61  
 62  
 63  
 64  
 65  
 66  
 67  
 68  
 69  
 70  
 71  
 72  
 73  
 74  
 75  
 76  
 77  
 78  
 79  
 80  
 81  
 82  
 83  
 84  
 85  
 86  
 87  
 88  
 89  
 90  
 91  
 92  
 93  
 94  
 95  
 96  
 97  
 98  
 99  
 100  
 101  
 102  
 103  
 104  
 105  
 106  
 107  
 108  
 109  
 110  
 111  
 112  
 113  
 114  
 115  
 116  
 117  
 118  
 119  
 120  
 121  
 122  
 123  
 124  
 125  
 126  
 127  
 128  
 129  
 130  
 131  
 132  
 133  
 134  
 135  
 136  
 137  
 138  
 139  
 140  
 141  
 142  
 143  
 144  
 145  
 146  
 147  
 148  
 149  
 150  
 151  
 152  
 153  
 154  
 155  
 156  
 157  
 158  
 159  
 160  
 161  
 162  
 163  
 164  
 165  
 166  
 167  
 168  
 169  
 170  
 171  
 172  
 173  
 174  
 175  
 176  
 177  
 178  
 179  
 180  
 181  
 182  
 183  
 184  
 185  
 186  
 187  
 188  
 189  
 190  
 191  
 192  
 193  
 194  
 195  
 196  
 197  
 198  
 199  
 200  
 201  
 202  
 203  
 204  
 205  
 206  
 207  
 208  
 209  
 210  
 211  
 212  
 213  
 214  
 215  
 216  
 217  
 218  
 219  
 220  
 221  
 222  
 223  
 224  
 225  
 226  
 227  
 228  
 229  
 230  
 231  
 232  
 233  
 234  
 235  
 236  
 237  
 238  
 239  
 240  
 241  
 242  
 243  
 244  
 245  
 246  
 247  
 248  
 249  
 250  
 251  
 252  
 253  
 254  
 255  
 256  
 257  
 258  
 259  
 260  
 261  
 262  
 263  
 264  
 265  
 266  
 267  
 268  
 269  
 270  
 271  
 272  
 273  
 274  
 275  
 276  
 277  
 278  
 279  
 280  
 281  
 282  
 283  
 284  
 285  
 286  
 287  
 288  
 289  
 290  
 291  
 292  
 293  
 294  
 295  
 296  
 297  
 298  
 299  
 300  
 301  
 302  
 303  
 304  
 305  
 306  
 307  
 308  
 309  
 310  
 311  
 312  
 313  
 314  
 315  
 316  
 317  
 318  
 319  
 320  
 321  
 322  
 323  
 324  
 325  
 326  
 327  
 328  
 329  
 330  
 331  
 332  
 333  
 334  
 335  
 336  
 337  
 338  
 339  
 340  
 341  
 342  
 343  
 344  
 345  
 346  
 347  
 348  
 349  
 350  
 351  
 352  
 353  
 354  
 355  
 356  
 357  
 358  
 359  
 360  
 361  
 362  
 363  
 364  
 365  
 366  
 367  
 368  
 369  
 370  
 371  
 372  
 373  
 374  
 375  
 376  
 377  
 378  
 379  
 380  
 381  
 382  
 383  
 384  
 385  
 386  
 387  
 388  
 389  
 390  
 391  
 392  
 393  
 394  
 395  
 396  
 397  
 398  
 399  
 400  
 401  
 402  
 403  
 404  
 405  
 406  
 407  
 408  
 409  
 410  
 411  
 412  
 413  
 414  
 415  
 416  
 417  
 418  
 419  
 420  
 421  
 422  
 423  
 424  
 425  
 426  
 427  
 428  
 429  
 430  
 431  
 432  
 433  
 434  
 435  
 436  
 437  
 438  
 439  
 440  
 441  
 442  
 443  
 444  
 445  
 446  
 447  
 448  
 449  
 450  
 451  
 452  
 453  
 454  
 455  
 456  
 457  
 458  
 459  
 460  
 461  
 462  
 463  
 464  
 465  
 466  
 467  
 468  
 469  
 470  
 471  
 472  
 473  
 474  
 475  
 476  
 477  
 478  
 479  
 480  
 481  
 482  
 483  
 484  
 485  
 486  
 487  
 488  
 489  
 490  
 491  
 492  
 493  
 494  
 495  
 496  
 497  
 498  
 499  
 500  
 501  
 502  
 503  
 504  
 505  
 506  
 507  
 508  
 509  
 510  
 511  
 512  
 513  
 514  
 515  
 516  
 517  
 518  
 519  
 520  
 521  
 522  
 523  
 524  
 525

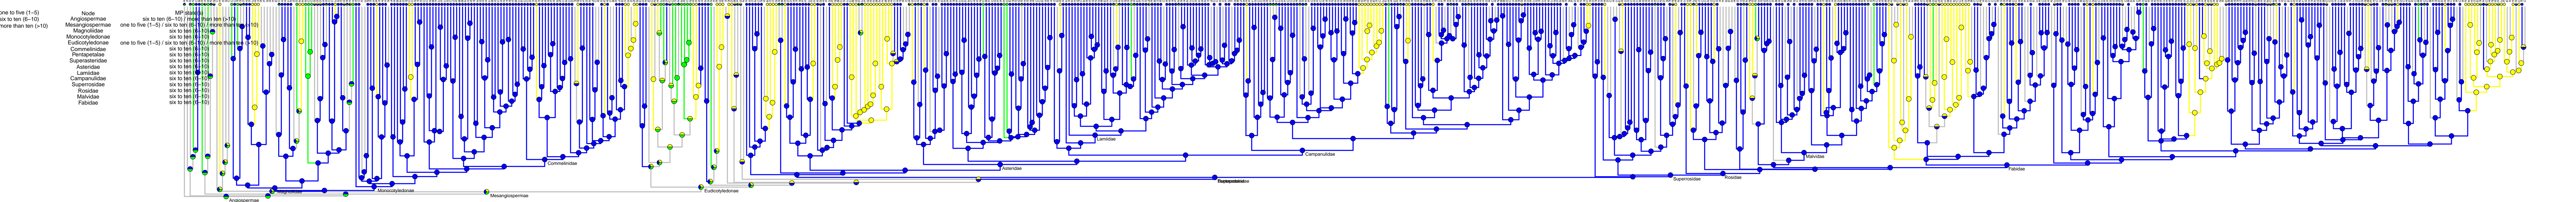

ML ancestral state reconstruction using rayDISC (R:corHMM)

201\_B. Number of perianth parts (3-state) (D2c), ARDeq model

- one to five (1–5)  
● six to ten (6–10)  
● more than ten (>10)

- Node ML state Prob  
Angiospermae more than ten (>10) 1  
Mesangiospermae more than ten (>10) 1  
Magnoliidae more than ten (>10) 0.9997  
Monocotyledonae six to ten (6–10) 0.5913  
Eudicotyledonae more than ten (>10) 0.9978  
Commelinidae six to ten (6–10) 0.9999  
Pentapetalae six to ten (6–10) 0.9946  
Superasteridae six to ten (6–10) 0.9999  
Asteridae six to ten (6–10) 0.9999  
Lamiidae six to ten (6–10) 0.9999  
Campanulidae six to ten (6–10) 1  
Superrosidae six to ten (6–10) 0.999  
Rosidae six to ten (6–10) 0.9993  
Malvidae six to ten (6–10) 0.9999  
Fabidae six to ten (6–10) 0.9992

| Model   | LogL    | Npar | AIC    | AICc   | DeltaAICc | w    | q01    | ... |
|---------|---------|------|--------|--------|-----------|------|--------|-----|
| ARD     | -325.6  | 6    | 663.19 | 663.3  | 2.2       | 0.25 | 0.004  | ... |
| ARDeq** | -324.5  | 6    | 661    | 661.1  | 0         | 0.74 | 0.004  | ... |
| ER      | -350.6  | 1    | 703.21 | 703.21 | 42.11     | 0    | 0.0013 | ... |
| SYM     | -339.65 | 3    | 685.3  | 685.33 | 24.23     | 0    | 0.002  | ... |
| SYMeq   | -338.58 | 3    | 683.16 | 683.19 | 22.08     | 0    | 0.002  | ... |
| ORD     | -331.92 | 4    | 671.85 | 671.9  | 10.8      | 0    | 0.0041 | ... |
| ORDeq   | -330.83 | 4    | 669.65 | 669.71 | 8.6       | 0.01 | 0.0041 | ... |
| ORDSYM  | -342.6  | 2    | 689.2  | 689.22 | 28.11     | 0    | 0.0021 | ... |
| ORDSYMq | -341.54 | 2    | 687.08 | 687.1  | 25.99     | 0    | 0.0021 | ... |
| ORDER   | -351.99 | 1    | 705.98 | 705.98 | 44.88     | 0    | 0.0014 | ... |

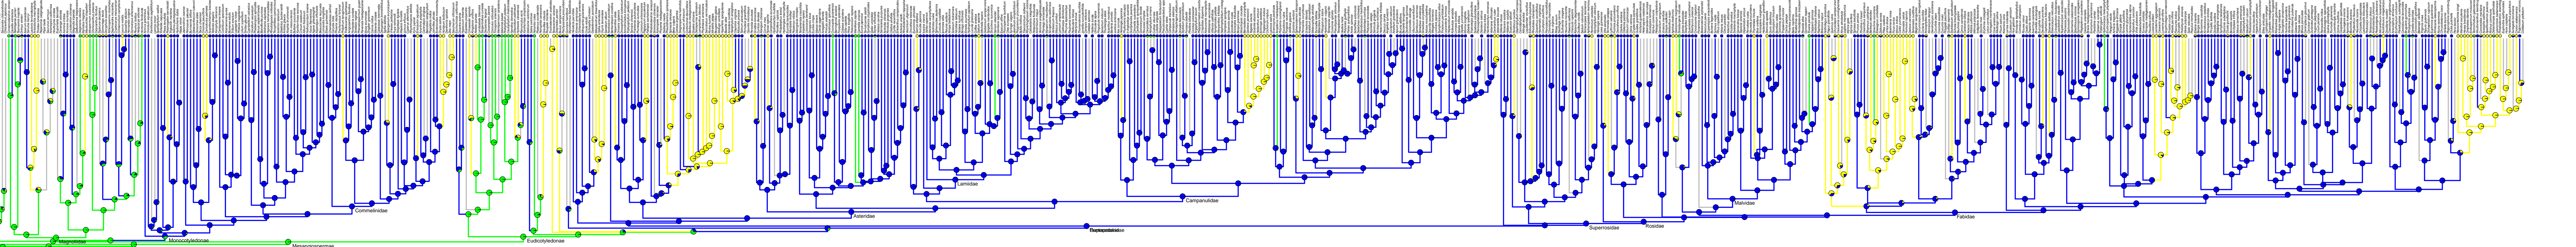

[illegible][illegible]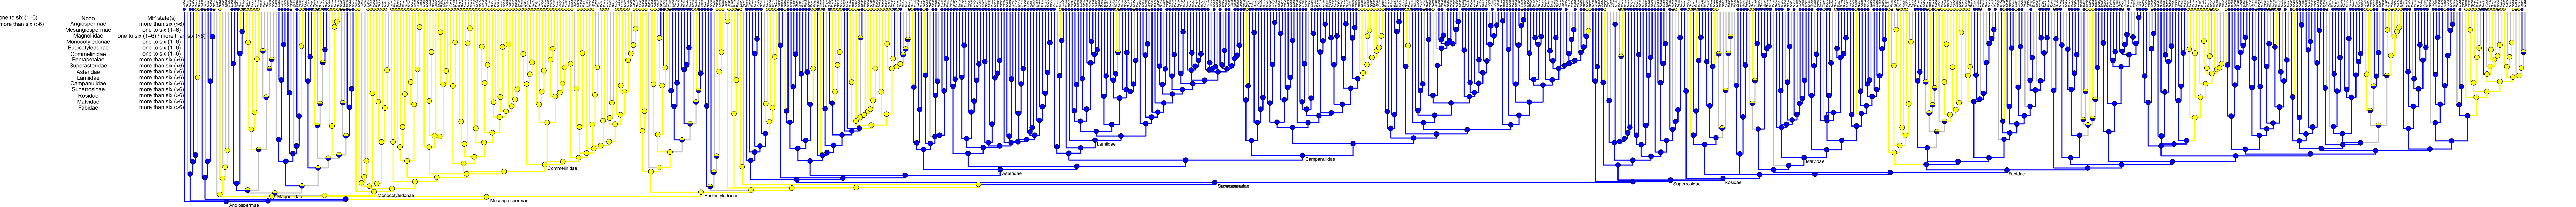

ML ancestral state reconstruction using rayDISC (R:corHMM)

201\_C. Number of perianth parts (binary) (D2c), ARDeq model

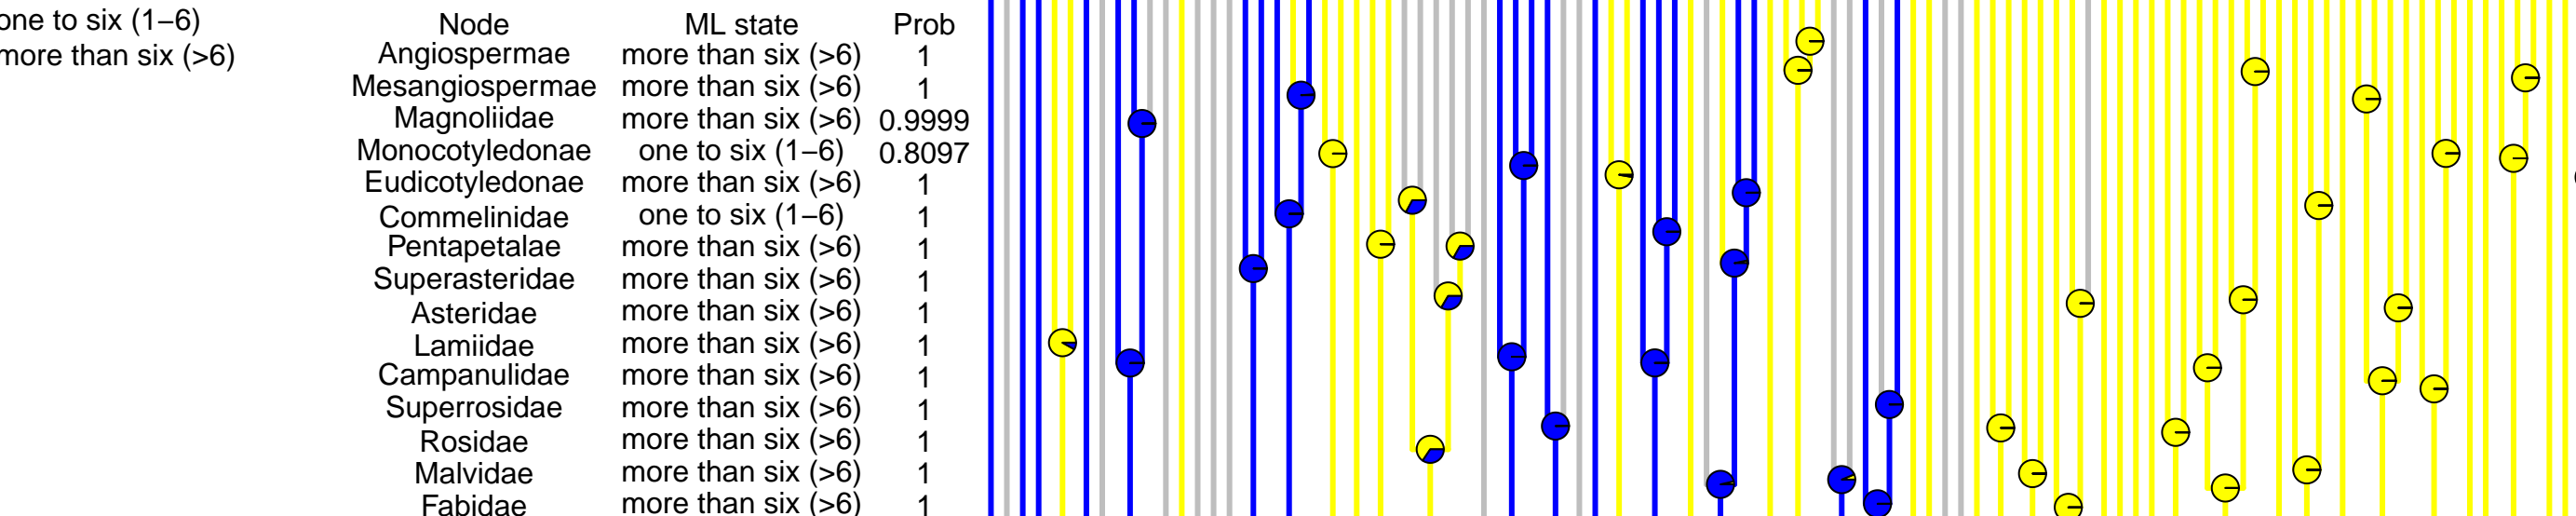

| Model   | LogL    | Npar | AIC    | AICc   | DeltaAICc | w    | q01    | q10    |
|---------|---------|------|--------|--------|-----------|------|--------|--------|
| ARD     | -248.39 | 2    | 500.79 | 500.8  | 1.39      | 0.33 | 6e-04  | 0.0026 |
| ARDeq** | -247.7  | 2    | 499.4  | 499.42 | 0         | 0.65 | 6e-04  | 0.0026 |
| ER      | -254.88 | 1    | 511.75 | 511.76 | 12.34     | 0    | 0.0022 | 0.0022 |
| UNI01   | -322.49 | 1    | 646.98 | 646.98 | 147.57    | 0    | 0.0081 |        |
| UNI10   | -252.26 | 1    | 506.52 | 506.52 | 7.1       | 0.02 | 0.0029 |        |

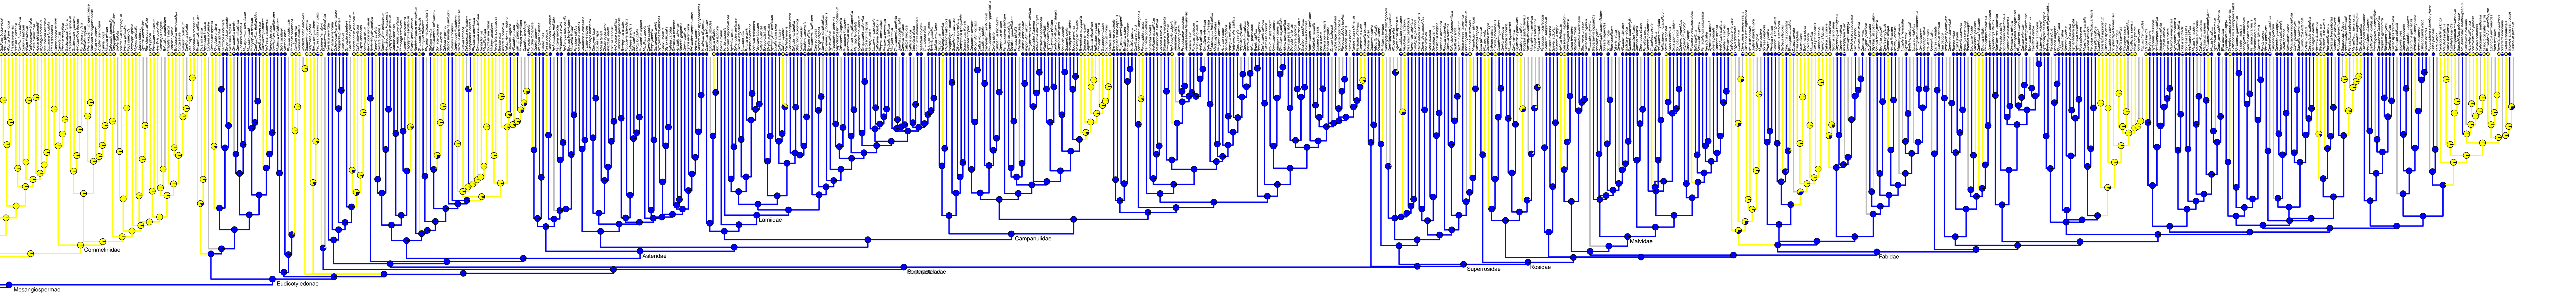

MP ancestral state reconstruction using ancestral.pars  
(R:phangorn)  
230\_A. Perianth phyllotaxy (binary) (D2d), 16 steps

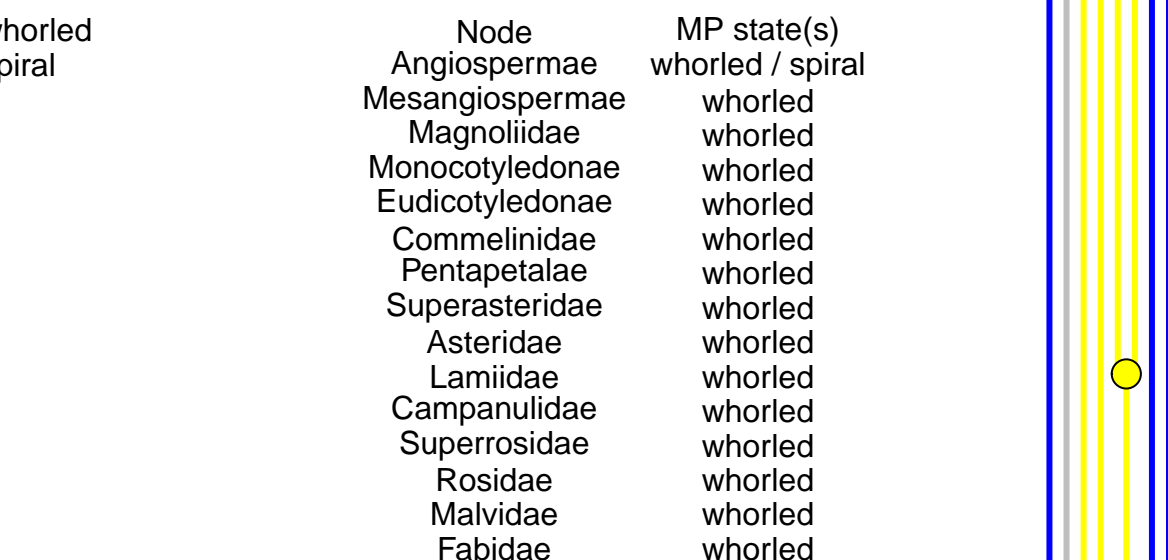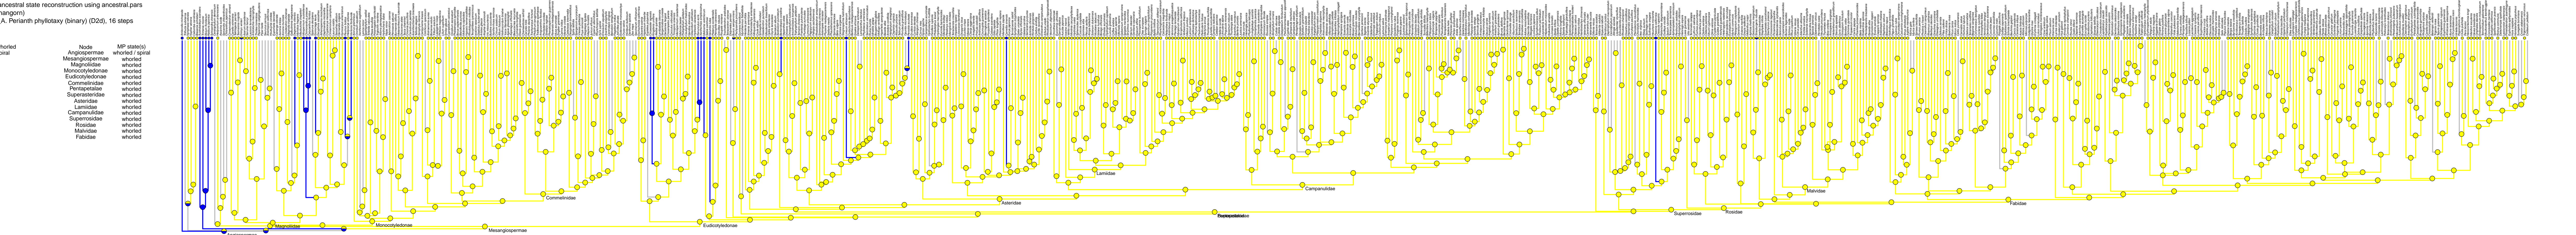

230 A. Perianth phyllotaxy (binary) (D2d). ARD model

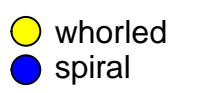

| Node       | ML state | Prob   |
|------------|----------|--------|
| pspermae   | spiral   | 1      |
| giospermae | spiral   | 1      |
| gnoliidae  | spiral   | 0.9985 |
| otyledonae | whorled  | 0.5128 |
| tyledonae  | spiral   | 0.9998 |
| melinidae  | whorled  | 0.9997 |
| apetalae   | whorled  | 0.9777 |
| rasteridae | whorled  | 0.9777 |
| teridae    | whorled  | 0.9995 |
| miidae     | whorled  | 1      |
| panulidae  | whorled  | 1      |
| errosidae  | whorled  | 0.9916 |
| osidae     | whorled  | 0.9945 |
| alvidae    | whorled  | 1      |
| abidae     | whorled  | 1      |

| Model  | LogL   | Npar | AIC    | AICc   | DeltaAICc | w    | q01   | q10    |
|--------|--------|------|--------|--------|-----------|------|-------|--------|
| ARD*** | -70.5  | 2    | 145    | 145.01 | 0         | 0.99 | 2e-04 | 0.0111 |
| ARDeq  | -77.64 | 2    | 159.29 | 159.3  | 14.29     | 0    | 4e-04 | 2e-04  |
| ER     | -78.3  | 1    | 158.6  | 158.61 | 13.6      | 0    | 4e-04 | 4e-04  |
| UNI01  | -78.36 | 1    | 158.72 | 158.73 | 13.71     | 0    | 4e-04 |        |
| UNI10  | -77.59 | 1    | 157.18 | 157.18 | 12.17     | 0    |       | 0.0185 |

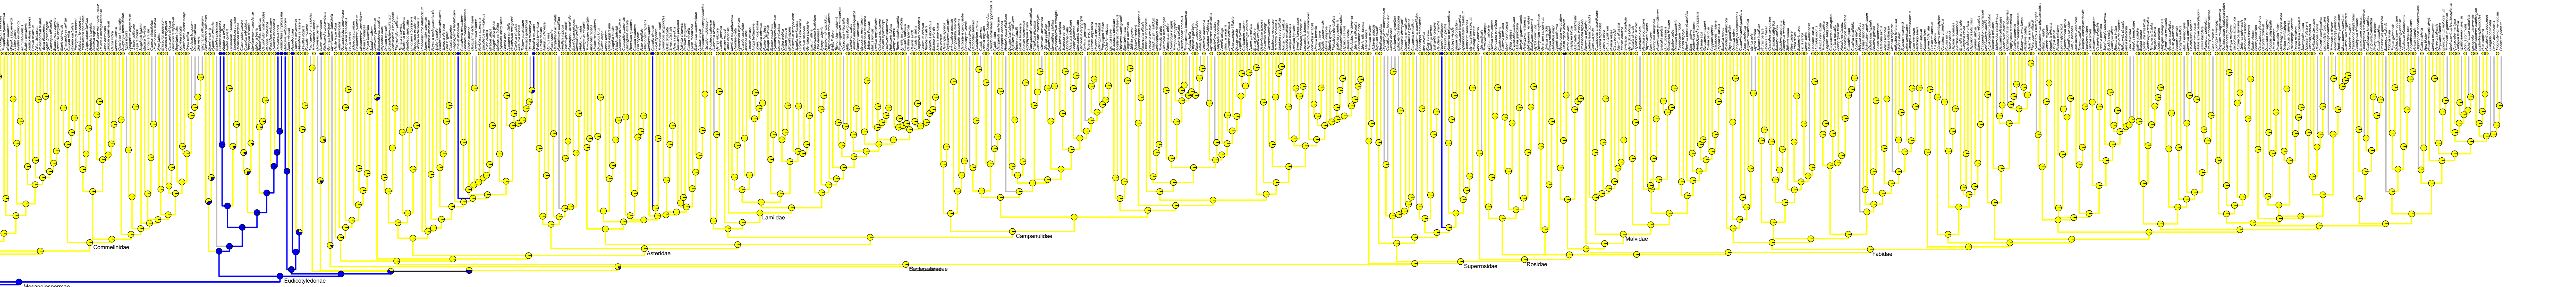

# MP ancestral state reconstruction using ancestral.pars

(R:phangorn)  
231\_A. Number of perianth whorls (D2c), 73 steps

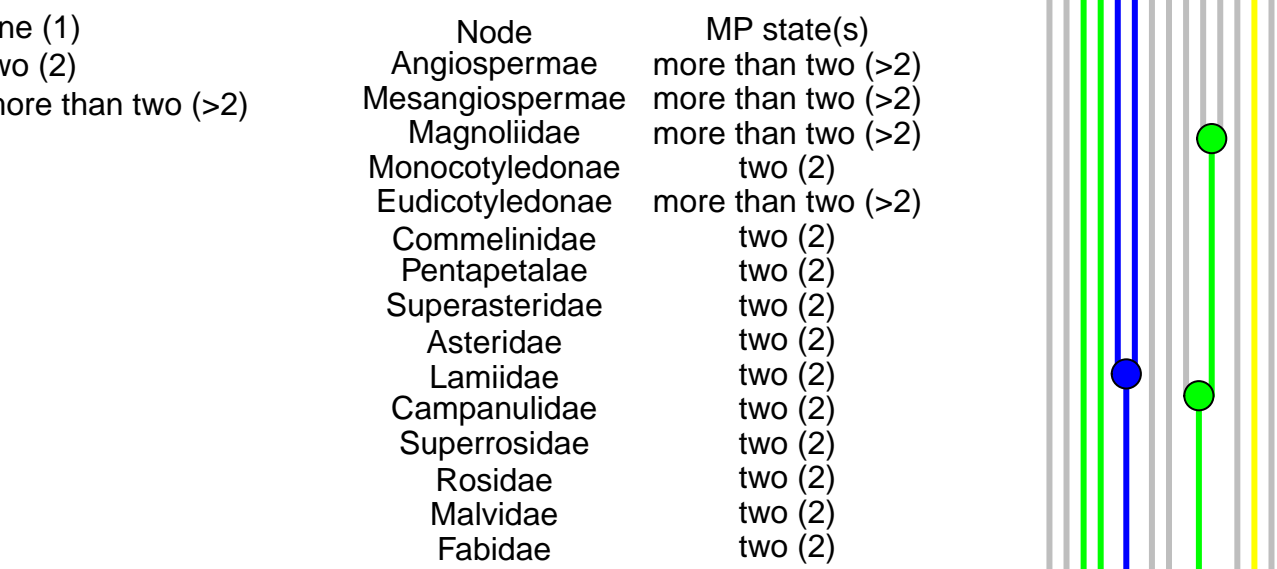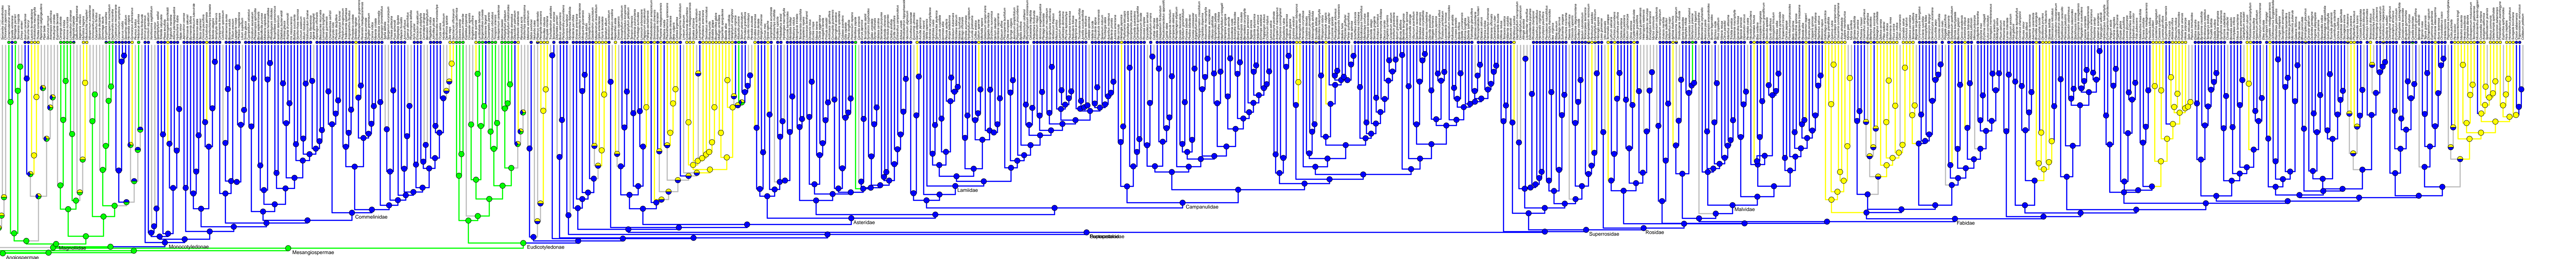

ML ancestral state reconstruction using rayDISC (R:corHMM)

231\_A. Number of perianth whorls (D2c), ARDeq model

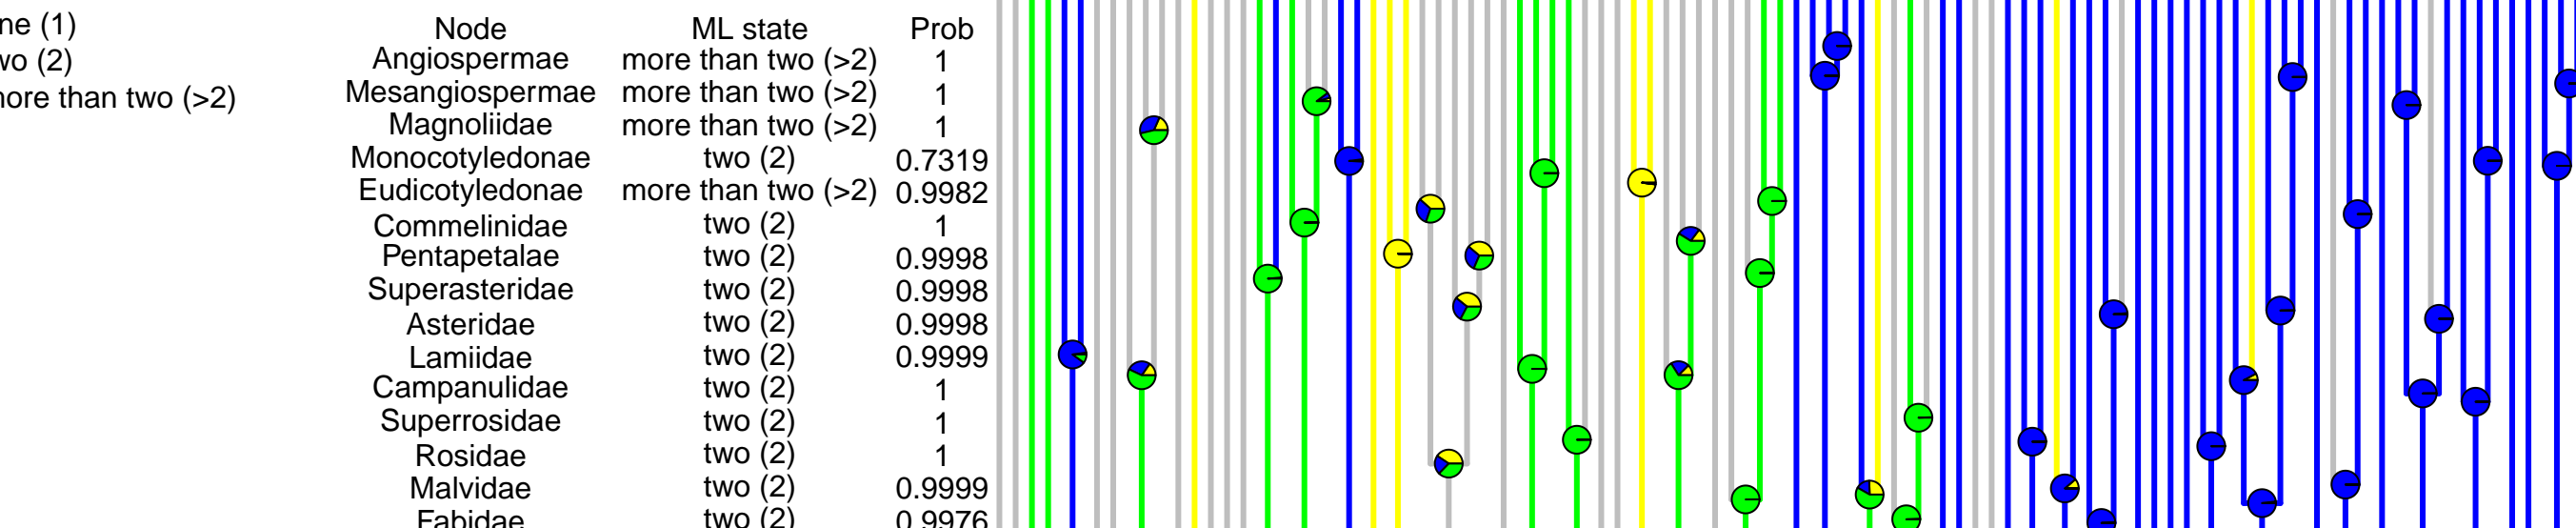

| Model    | LogL    | Npar | AIC    | AICc   | DeltaAICc | w    | q01    | ... |
|----------|---------|------|--------|--------|-----------|------|--------|-----|
| ARD      | -269.29 | 6    | 550.58 | 550.69 | 2.2       | 0.25 | 0.0047 | ... |
| ARDeq**  | -268.19 | 6    | 548.39 | 548.49 | 0         | 0.75 | 0.0047 | ... |
| ER       | -310.86 | 1    | 623.72 | 623.73 | 75.23     | 0    | 0.001  | ... |
| SYM      | -293.14 | 3    | 592.29 | 592.32 | 43.82     | 0    | 0.0018 | ... |
| SYMeq    | -292.16 | 3    | 590.32 | 590.35 | 41.86     | 0    | 0.0018 | ... |
| ORD      | -276.93 | 4    | 561.85 | 561.91 | 13.41     | 0    | 0.0045 | ... |
| ORDeq    | -275.83 | 4    | 559.66 | 559.71 | 11.21     | 0    | 0.0045 | ... |
| ORDSYM   | -298.57 | 2    | 601.14 | 601.16 | 52.67     | 0    | 0.0019 | ... |
| ORDSYMeq | -297.51 | 2    | 599.02 | 599.04 | 50.54     | 0    | 0.0019 | ... |
| ORDER    | -313.4  | 1    | 628.81 | 628.81 | 80.32     | 0    | 0.0012 | ... |

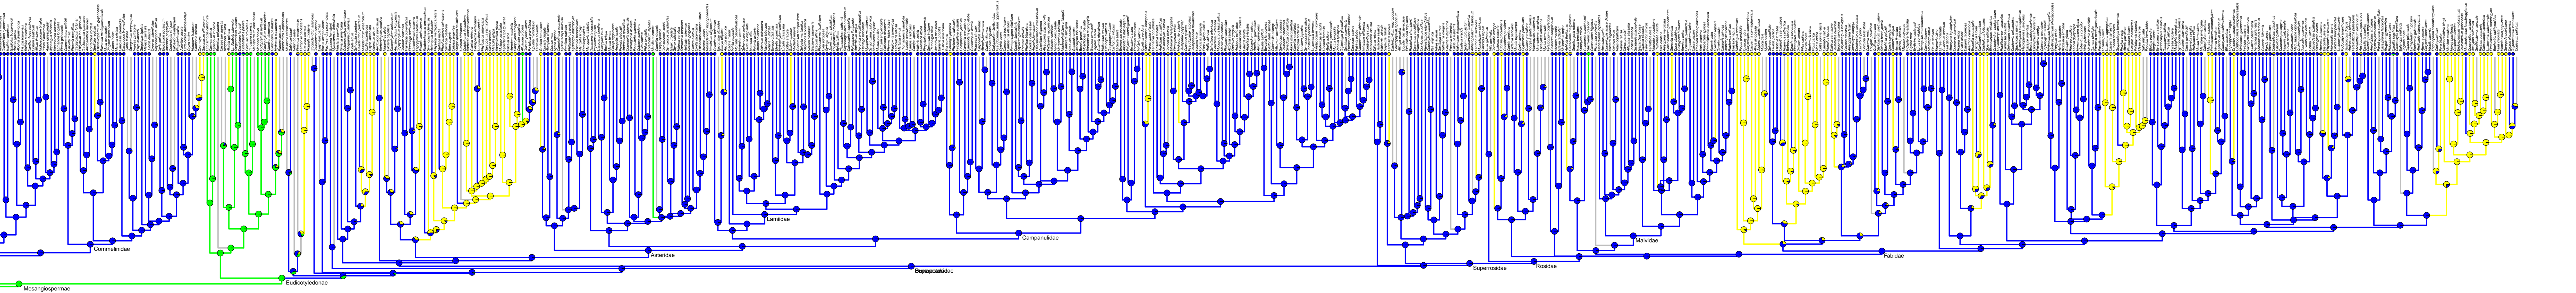



ML ancestral state reconstruction using rayDISC (R:corHMM)  
232\_A. Perianth merism (4–state) (D2c), SYMeq model

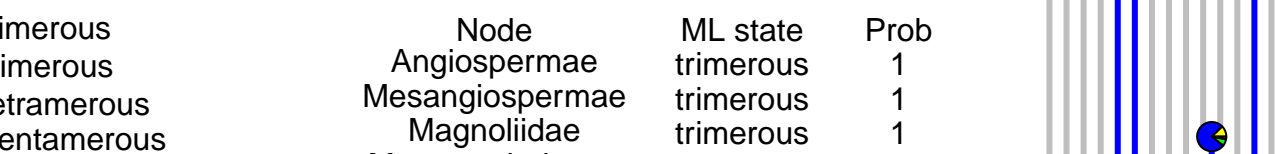

| Node            | ML state    | Prob   |
|-----------------|-------------|--------|
| Angiospermae    | trimerous   | 1      |
| Mesangiospermae | trimerous   | 1      |
| Magnoliidae     | trimerous   | 1      |
| Monocotyledonae | trimerous   | 0.9742 |
| Eudicotyledonae | trimerous   | 0.9998 |
| Commelinidae    | trimerous   | 1      |
| Pentapetalae    | pentamerous | 0.9998 |
| Superasteridae  | pentamerous | 1      |
| Asteridae       | pentamerous | 1      |
| Lamiidae        | pentamerous | 1      |
| Campanulidae    | pentamerous | 1      |
| Superrosidae    | pentamerous | 1      |
| Rosidae         | pentamerous | 1      |
| Malvidae        | pentamerous | 1      |
| Fabidae         | pentamerous | 1      |

| Model   | LogL    | Npar | AIC    | AICc   | DeltaAICc | w    | q01    | ... |
|---------|---------|------|--------|--------|-----------|------|--------|-----|
| ARD     | -321.85 | 12   | 667.7  | 668.1  | 7.62      | 0.02 | 6e-04  | ... |
| ARDeq   | -320.5  | 12   | 665    | 665.4  | 4.92      | 0.06 | 5e-04  | ... |
| ER      | -360.15 | 1    | 722.29 | 722.3  | 61.81     | 0    | 8e-04  | ... |
| SYM     | -325.57 | 6    | 663.14 | 663.25 | 2.76      | 0.19 | 0.0013 | ... |
| SYMeq** | -324.19 | 6    | 660.38 | 660.49 | 0         | 0.74 | 0.0013 | ... |
| ORD     | -336.7  | 6    | 685.4  | 685.51 | 25.02     | 0    | 0      | ... |
| ORDeq   | -336.17 | 6    | 684.33 | 684.44 | 23.95     | 0    | 0      | ... |
| ORDSYM  | -344.42 | 3    | 694.85 | 694.88 | 34.39     | 0    | 0.002  | ... |
| ORDSYMq | -343.05 | 3    | 692.1  | 692.14 | 31.65     | 0    | 0.002  | ... |
| ORDER   | -345.93 | 1    | 693.86 | 693.86 | 33.38     | 0    | 0.0025 | ... |

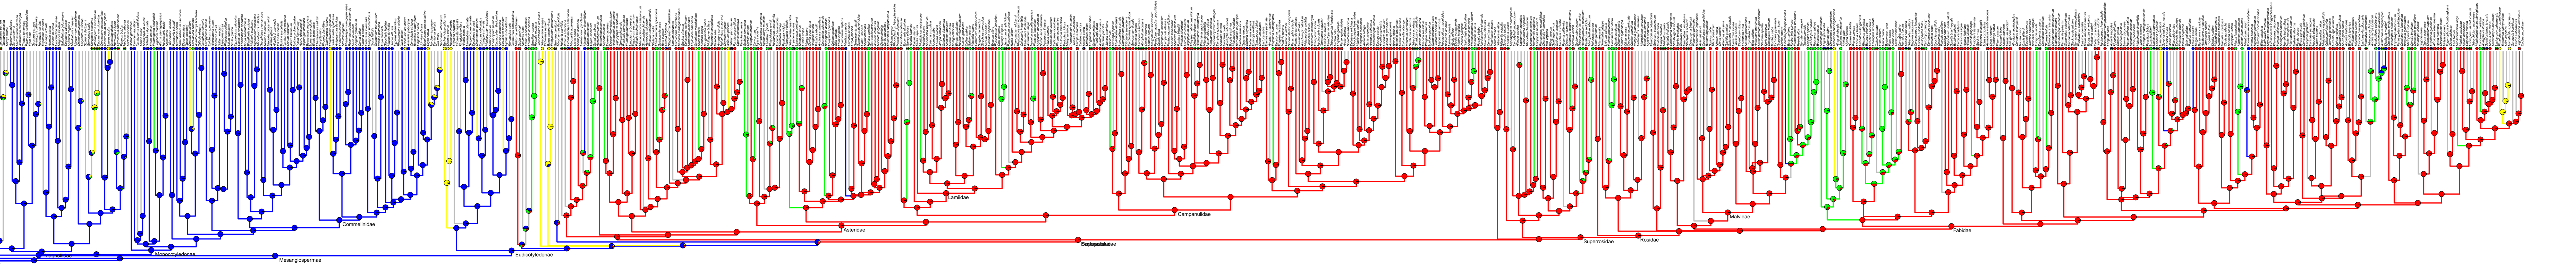

MP ancestral state reconstruction using ancestral.pars  
(R:phangorn)

232\_B. Perianth merism (3-state) (D2c), 70 steps

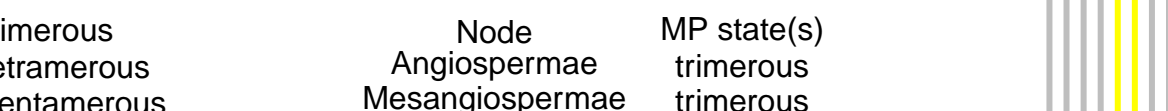

Node  
Angiospermae  
Mesangiospermae  
Magnoliidae  
Monocotyledonae  
Eudicotyledonae  
Commelinidae  
Pentapetalae  
Superasteridae  
Asteridae  
Lamiidae  
Campanulidae  
Superrosidae  
Rosidae  
Malvidae  
Fabidae

MP state(s)  
trimerous  
trimerous  
trimerous  
trimerous  
trimerous  
trimerous  
pentamerous  
pentamerous  
pentamerous  
pentamerous  
pentamerous  
pentamerous  
pentamerous  
pentamerous  
pentamerous

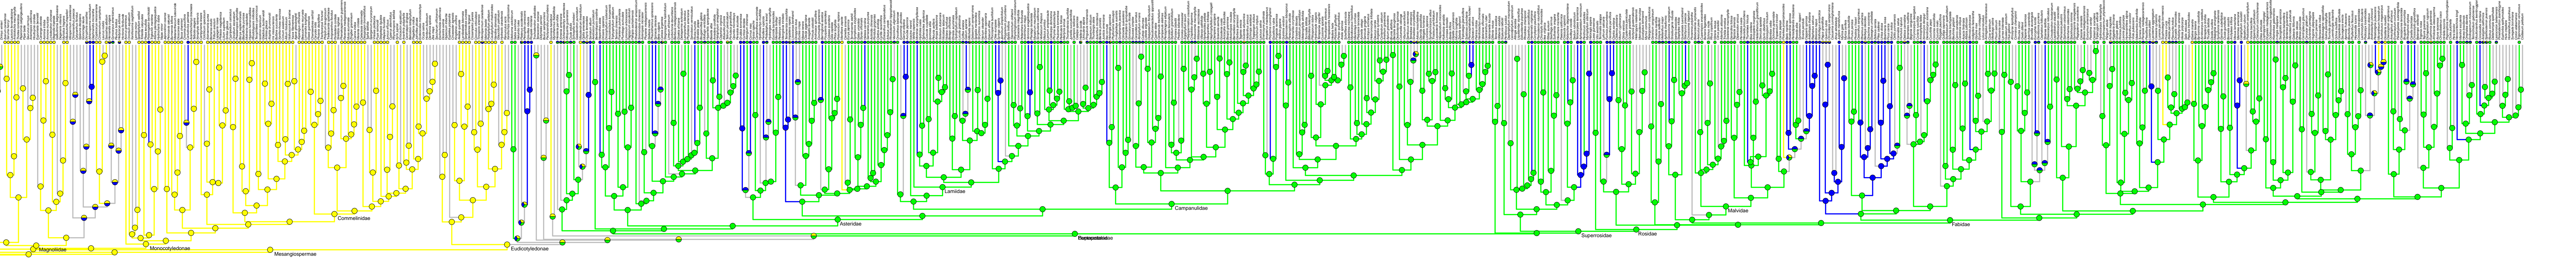

ML ancestral state reconstruction using rayDISC (R:corHMM)  
232\_B. Perianth merism (3–state) (D2c), SYMeq model

● trimerous  
● tetramerous  
● pentamerous

| Node            | ML state    | Prob   |
|-----------------|-------------|--------|
| Angiospermae    | trimerous   | 1      |
| Mesangiospermae | trimerous   | 1      |
| Magnoliidae     | trimerous   | 1      |
| Monocotyledonae | trimerous   | 1      |
| Eudicotyledonae | trimerous   | 0.9831 |
| Commelinidae    | trimerous   | 1      |
| Pentapetalae    | pentamerous | 0.9998 |
| Superasteridae  | pentamerous | 0.9998 |
| Asteridae       | pentamerous | 1      |
| Lamiidae        | pentamerous | 1      |
| Campanulidae    | pentamerous | 1      |
| Superrosidae    | pentamerous | 1      |
| Rosidae         | pentamerous | 1      |
| Malvidae        | pentamerous | 1      |
| Fabidae         | pentamerous | 1      |

| Model    | LogL    | Npar | AIC    | AICc   | DeltaAICc | w    | q01    | ... |
|----------|---------|------|--------|--------|-----------|------|--------|-----|
| ARD      | -255.64 | 6    | 523.29 | 523.39 | 6.11      | 0.02 | 8e-04  | ... |
| ARDeq    | -254.59 | 6    | 521.17 | 521.28 | 3.99      | 0.06 | 7e-04  | ... |
| ER       | -280.83 | 1    | 563.65 | 563.66 | 46.37     | 0    | 0.0011 | ... |
| SYM      | -256.72 | 3    | 519.45 | 519.48 | 2.19      | 0.14 | 0.001  | ... |
| SYMeq*   | -255.63 | 3    | 517.26 | 517.29 | 0         | 0.43 | 0.001  | ... |
| ORD      | -256.46 | 4    | 520.92 | 520.97 | 3.68      | 0.07 | 9e-04  | ... |
| ORDeq    | -255.52 | 4    | 519.04 | 519.09 | 1.8       | 0.17 | 0.001  | ... |
| ORDSYM   | -259.42 | 2    | 522.84 | 522.85 | 5.56      | 0.03 | 0.0015 | ... |
| ORDSYMeq | -258.34 | 2    | 520.69 | 520.7  | 3.41      | 0.08 | 0.0015 | ... |
| ORDER    | -261.69 | 1    | 525.37 | 525.38 | 8.09      | 0.01 | 0.0023 | ... |

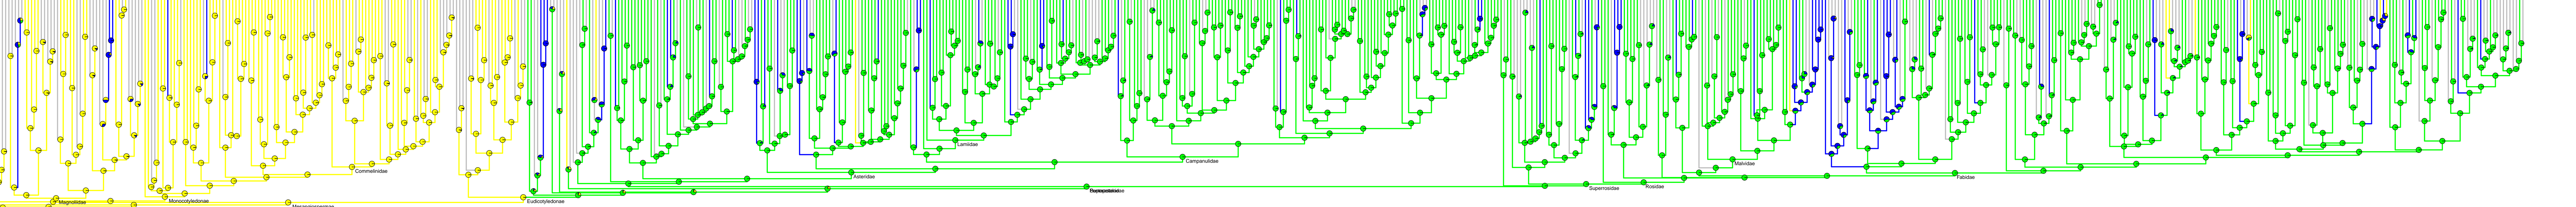

MP ancestral state reconstruction using ancestral.pars

(R:phangorn)  
234\_A. Perianth differentiation (binary) (D2d), 65 steps

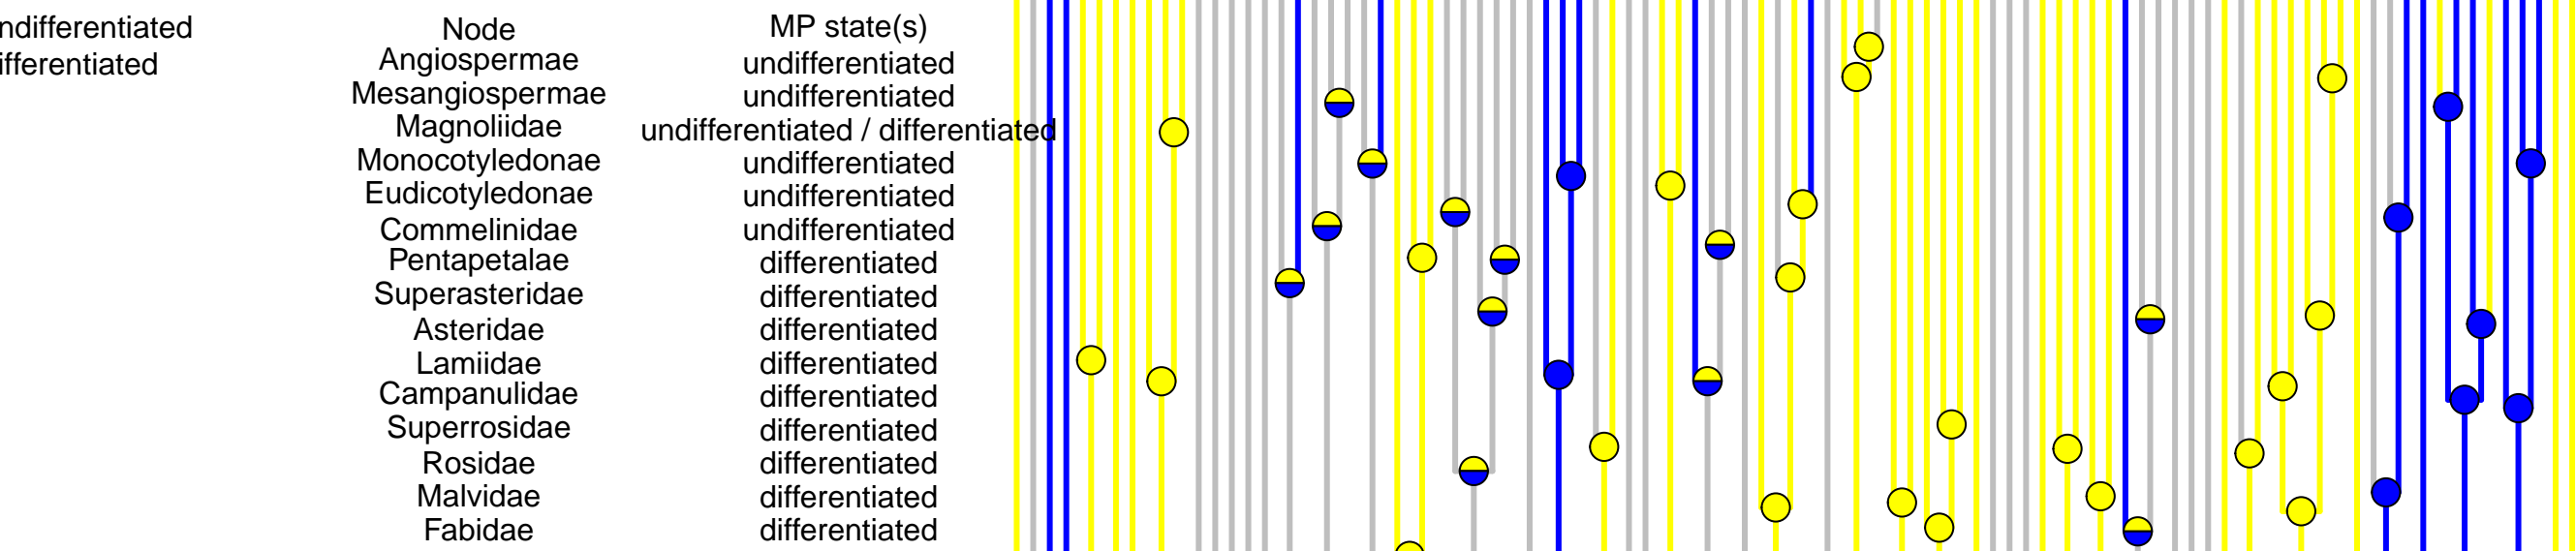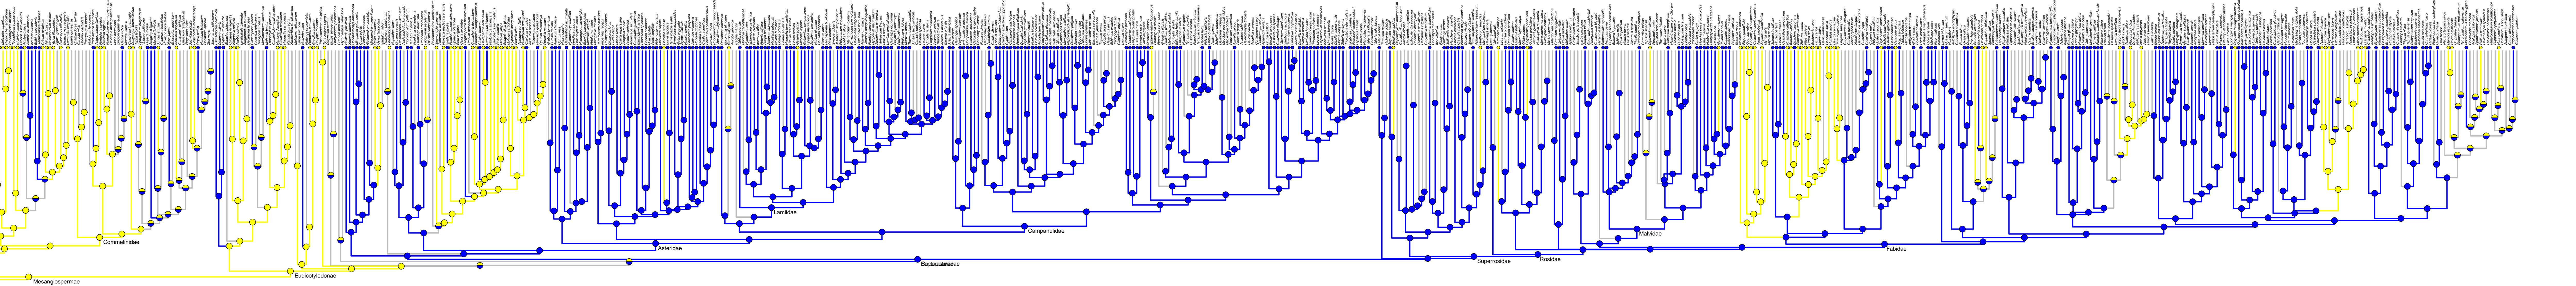

ML ancestral state reconstruction using rayDISC (R:corHMM)

234\_A. Perianth differentiation (binary) (D2), ARDeq model

● undifferentiated  
● differentiated

| Node            | ML state         | Prob   |
|-----------------|------------------|--------|
| Angiospermae    | undifferentiated | 1      |
| Mesangiospermae | undifferentiated | 1      |
| Magnoliidae     | undifferentiated | 1      |
| Monocotyledonae | undifferentiated | 1      |
| Eudicotyledonae | undifferentiated | 0.9915 |
| Commelinidae    | undifferentiated | 0.9999 |
| Pentapetalae    | differentiated   | 0.9429 |
| Superasteridae  | differentiated   | 0.9429 |
| Asteridae       | differentiated   | 0.9977 |
| Lamiidae        | differentiated   | 0.9998 |
| Campanulidae    | differentiated   | 1      |
| Superrosidae    | differentiated   | 0.9913 |
| Rosidae         | differentiated   | 0.9945 |
| Malvidae        | differentiated   | 0.9988 |
| Fabidae         | differentiated   | 0.9865 |

| Model   | LogL    | Npar | AIC    | AICc   | DeltaAICc | w    | q01    | q10    |
|---------|---------|------|--------|--------|-----------|------|--------|--------|
| ARD     | -199.82 | 2    | 403.64 | 403.66 | 1.38      | 0.33 | 0.0046 | 0.0015 |
| ARDeq** | -199.13 | 2    | 402.26 | 402.27 | 0         | 0.67 | 0.0046 | 0.0015 |
| ER      | -209.24 | 1    | 420.48 | 420.48 | 18.21     | 0    | 0.0025 | 0.0025 |
| UNI01   | -228.29 | 1    | 458.58 | 458.59 | 56.32     | 0    | 0.0089 |        |
| UNI10   | -233.78 | 1    | 469.55 | 469.56 | 67.28     | 0    | 0.0034 |        |

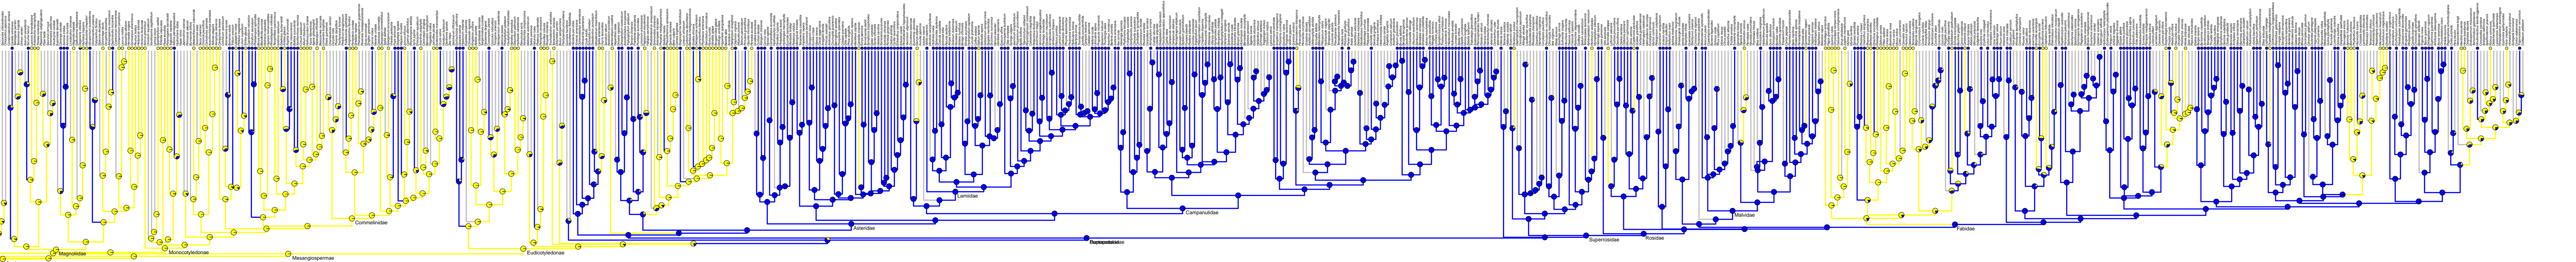

MP ancestral state reconstruction using ancestral.pars

(R:phangorn)  
204\_A. Fusion of perianth (D2c). 77 steps

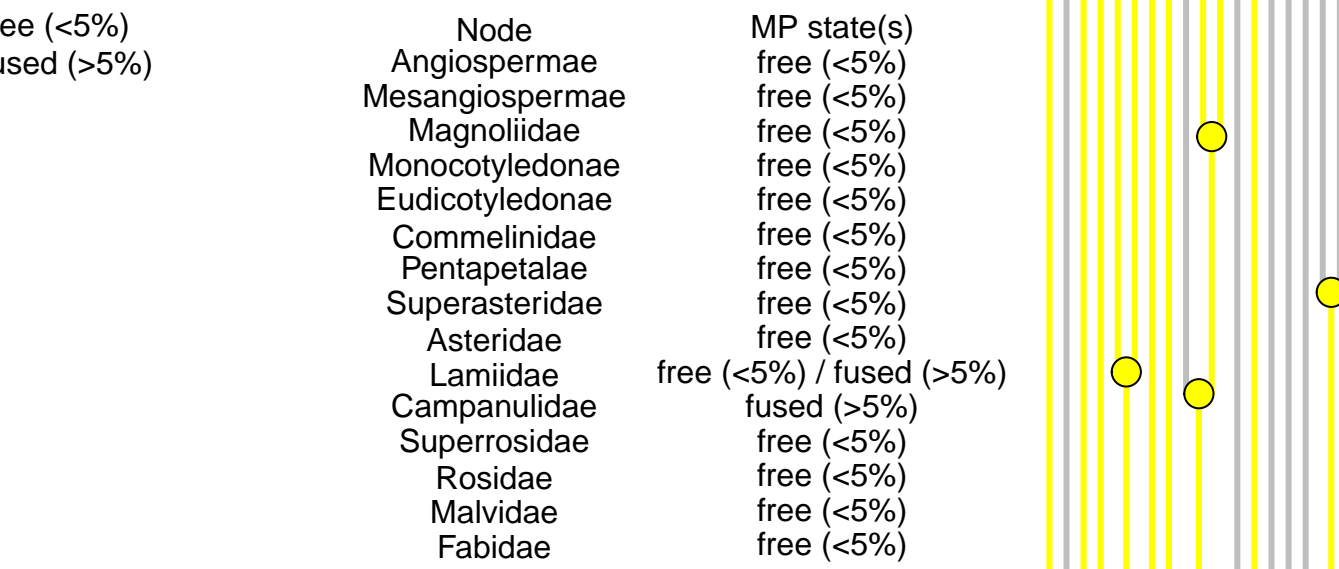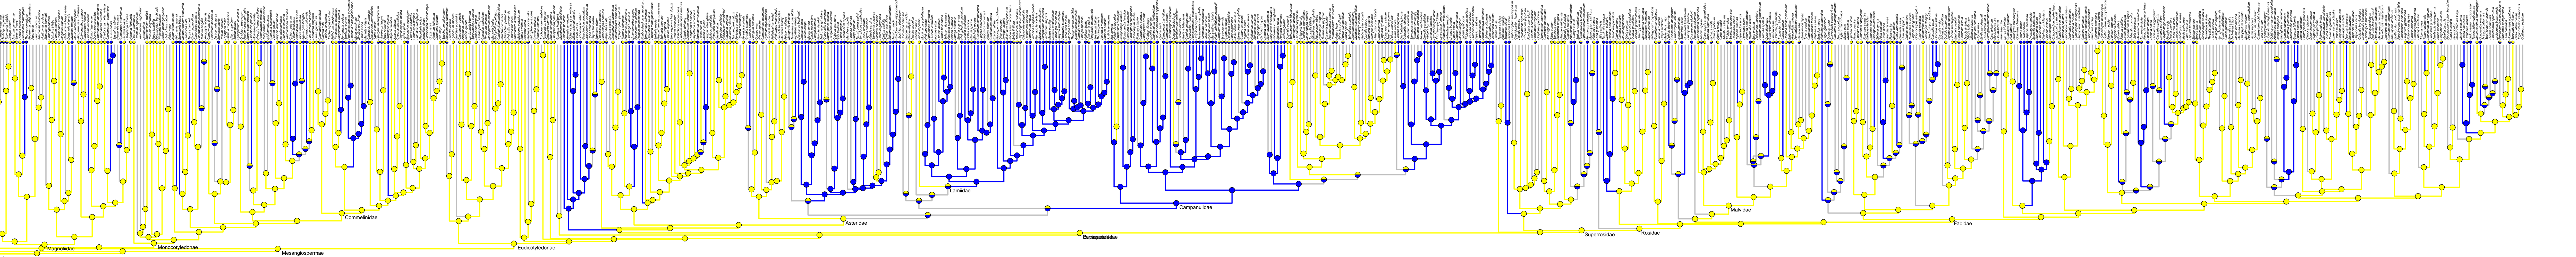

ML ancestral state reconstruction using rayDISC (R:corHMM)  
204\_A. Fusion of perianth (D2c), ARDeq model

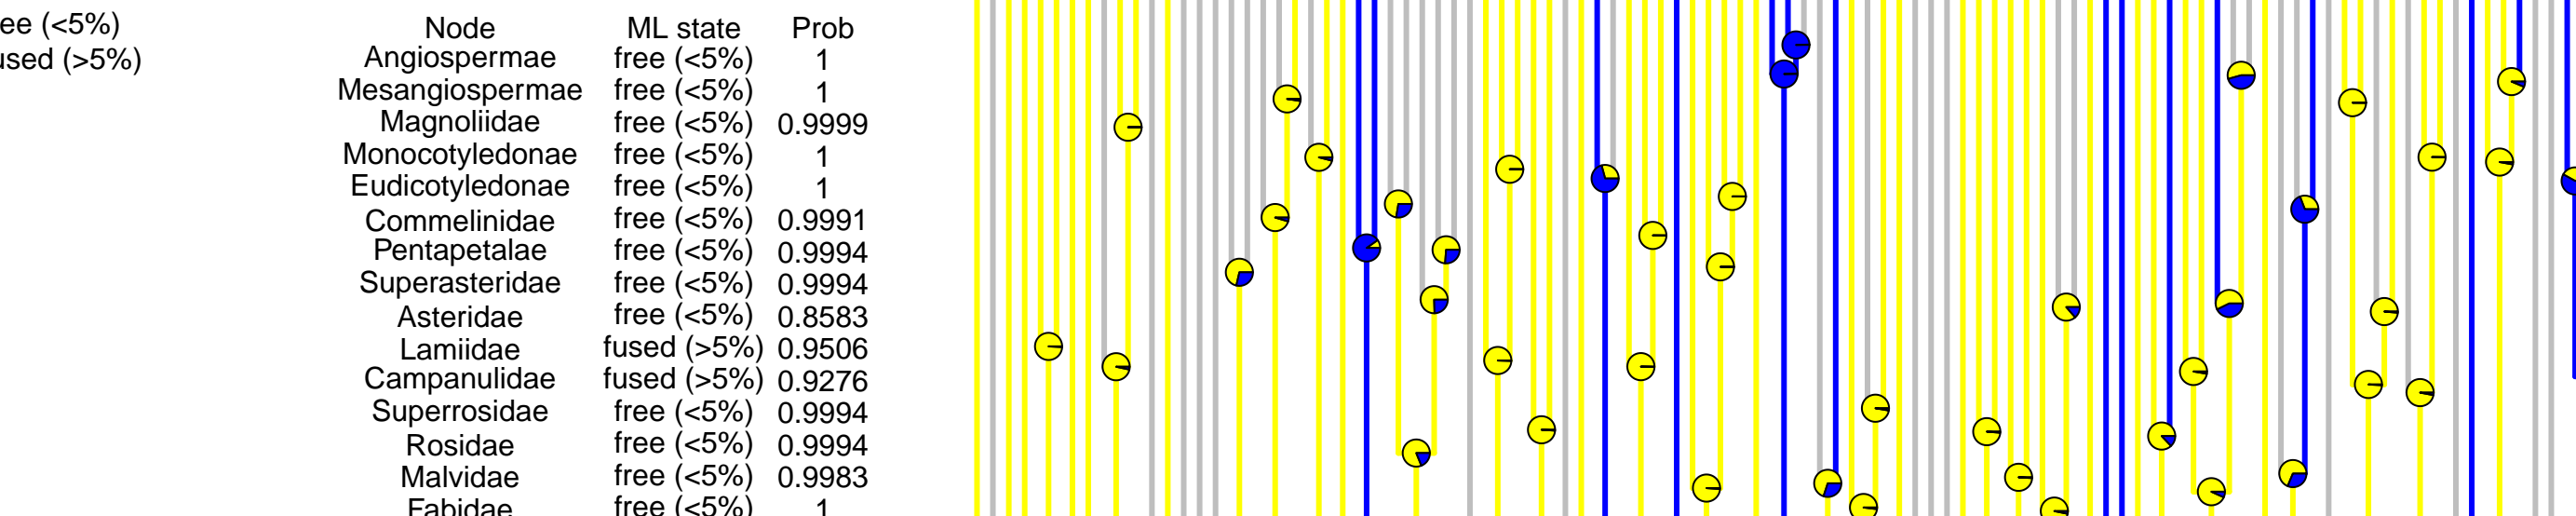

| Model  | LogL    | Npar | AIC    | AICc   | DeltaAICc | w    | q01    | q10    |
|--------|---------|------|--------|--------|-----------|------|--------|--------|
| ARD    | -224.54 | 2    | 453.08 | 453.1  | 1.38      | 0.21 | 0.0044 | 0.0035 |
| ARDeq* | -223.85 | 2    | 451.7  | 451.71 | 0         | 0.42 | 0.0044 | 0.0035 |
| ER     | -225.01 | 1    | 452.01 | 452.02 | 0.3       | 0.36 | 0.0042 | 0.0042 |
| UNI01  | -226.28 | 1    | 474.56 | 474.57 | 22.85     | 0    | 0.0049 |        |
| UNI10  | -236.29 | 1    | 474.58 | 474.59 | 22.87     | 0    | 0.008  |        |

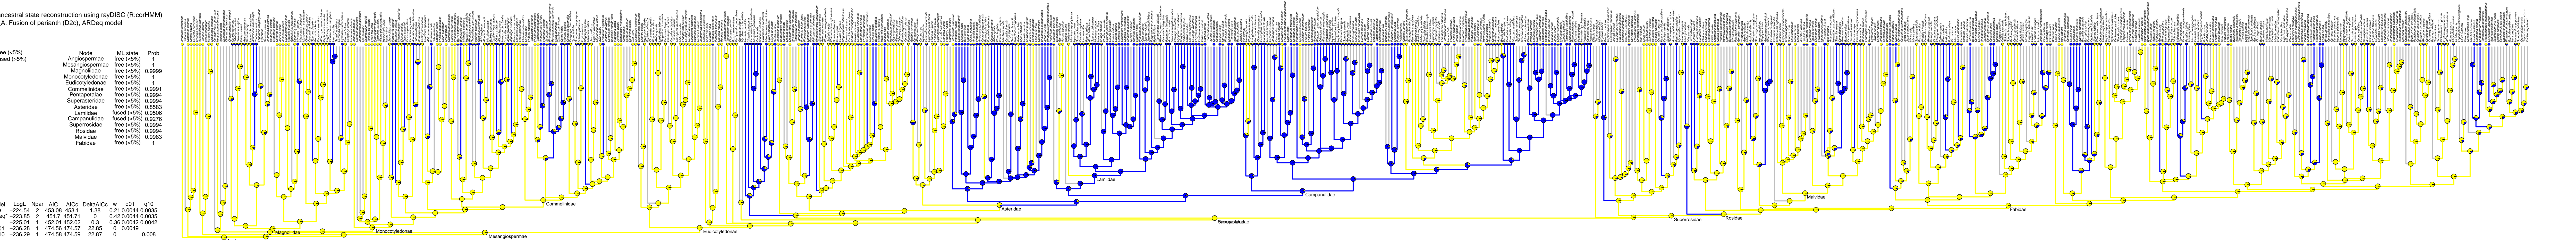

MP ancestral state reconstruction using ancestral.pars

(R:phangorn)

207\_A. Symmetry of perianth (binary) (D2d), 55 steps

● actinomorphic  
● zygomorphic

| Node            | MP state(s)   |
|-----------------|---------------|
| Angiospermae    | actinomorphic |
| Mesangiospermae | actinomorphic |
| Magnoliidae     | actinomorphic |
| Monocotyledonae | actinomorphic |
| Eudicotyledonae | actinomorphic |
| Commelinidae    | actinomorphic |
| Pentapetales    | actinomorphic |
| Superasteridae  | actinomorphic |
| Asteridae       | actinomorphic |
| Lamiidae        | actinomorphic |
| Campanulidae    | actinomorphic |
| Superrosidae    | actinomorphic |
| Rosidae         | actinomorphic |
| Malvidae        | actinomorphic |
| Fabidae         | actinomorphic |

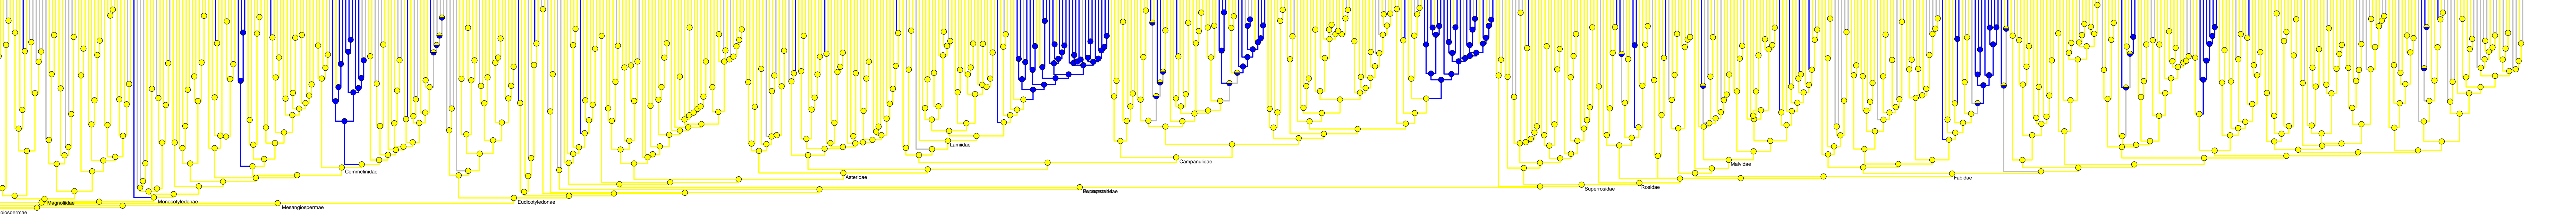

ML ancestral state reconstruction using rayDISC (R:corHMM)  
207\_A. Symmetry of perianth (binary) (D2d), ARDeq model

● actinomorphic  
● zygomorphic

| Node            | ML state      | Prob   |
|-----------------|---------------|--------|
| Angiospermae    | actinomorphic | 1      |
| Mesangiospermae | actinomorphic | 1      |
| Magnoliidae     | actinomorphic | 1      |
| Monocotyledonae | actinomorphic | 0.9997 |
| Eudicotyledonae | actinomorphic | 1      |
| Commelinidae    | actinomorphic | 0.9976 |
| Pentapetalae    | actinomorphic | 1      |
| Superasteridae  | actinomorphic | 1      |
| Asteridae       | actinomorphic | 1      |
| Lamiidae        | actinomorphic | 0.998  |
| Campanulidae    | actinomorphic | 1      |
| Superrosidae    | actinomorphic | 1      |
| Rosidae         | actinomorphic | 1      |
| Malvidae        | actinomorphic | 0.9998 |
| Fabidae         | actinomorphic | 1      |

| Model   | LogL    | Npar | AIC    | AICc   | DeltaAICc | w    | q01    | q10    |
|---------|---------|------|--------|--------|-----------|------|--------|--------|
| ARD     | -209.77 | 2    | 423.55 | 423.56 | 1.37      | 0.33 | 0.0014 | 0.0059 |
| ARDeq** | -209.09 | 2    | 422.17 | 422.19 | 0         | 0.66 | 0.0014 | 0.0059 |
| ER      | -217.62 | 1    | 437.24 | 437.24 | 15.06     | 0    | 0.0015 | 0.0015 |
| UNI01   | -258.94 | 1    | 519.88 | 519.88 | 97.7      | 0    | 0.0018 |        |
| UNI10   | -216.82 | 1    | 435.64 | 435.64 | 13.45     | 0    |        | 0.0167 |

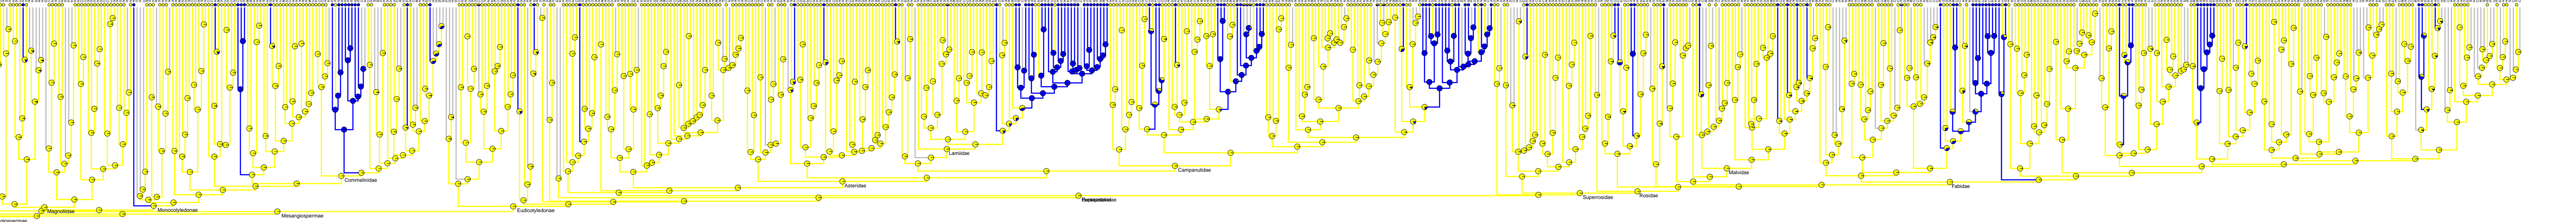

MP ancestral state reconstruction using ancestral.pars

(R:phangorn)

301\_B. Number of fertile stamens (3-state) (D2c), 157 steps

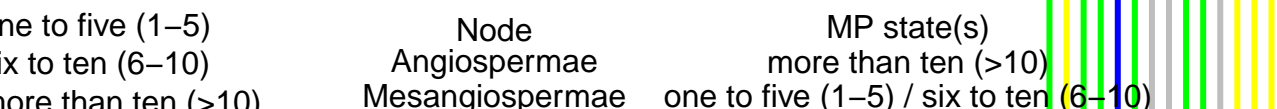

- Node
- Angiospermae
  - Mesangiospermae
  - Magnoliidae
  - Monocotyledonae
  - Eudicotyledonae
  - Commelinidae
  - Pentapetalae
  - Superasteridae
  - Asteridae
  - Lamiidae
  - Campanulidae
  - Superrosidae
  - Rosidae
  - Malvidae
  - Fabidae

- MP state(s)
- more than ten (>10)
  - one to five (1-5) / six to ten (6-10)
  - six to ten (6-10)
  - one to five (1-5) / six to ten (6-10)
  - one to five (1-5) / six to ten (6-10)
  - one to five (1-5)
  - one to five (1-5)
  - six to ten (6-10)
  - six to ten (6-10)
  - six to ten (6-10)

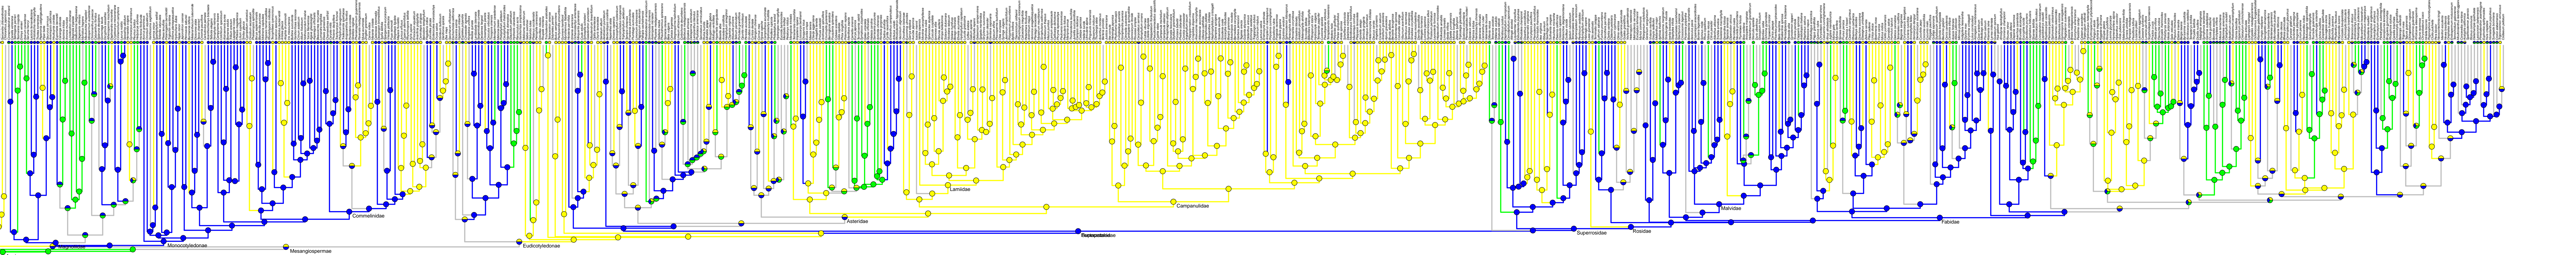

1 B Number of fertile stamens (3-state) (D2c) ARDeg model

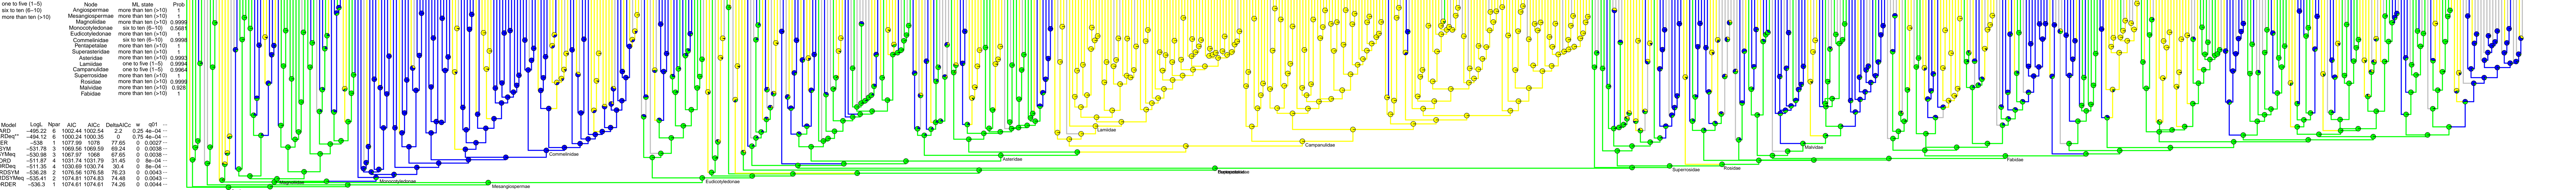

MP ancestral state reconstruction using ancestral.pars

(R:phangorn)

301\_C. Number of fertile stamens (binary) (D2c), 93 steps

● one to six (1-6)  
● more than six (>6)

Node  
Angiospermae  
Mesangiospermae  
Magnoliidae  
Monocotyledonae  
Eudicotyledonae  
Commelinidae  
Pentapetalae  
Superasteridae  
Asteridae  
Lamiidae  
Campanulidae  
Superrosidae  
Rosidae  
Malvidae  
Fabidae

MP state(s)  
more than six (>6)  
one to six (1-6)  
one to six (1-6) / more than six (>6)  
one to six (1-6)  
one to six (1-6)  
more than six (>6)  
more than six (>6)  
one to six (1-6)  
one to six (1-6)  
more than six (>6)  
one to six (1-6)  
more than six (>6)  
more than six (>6)  
more than six (>6)

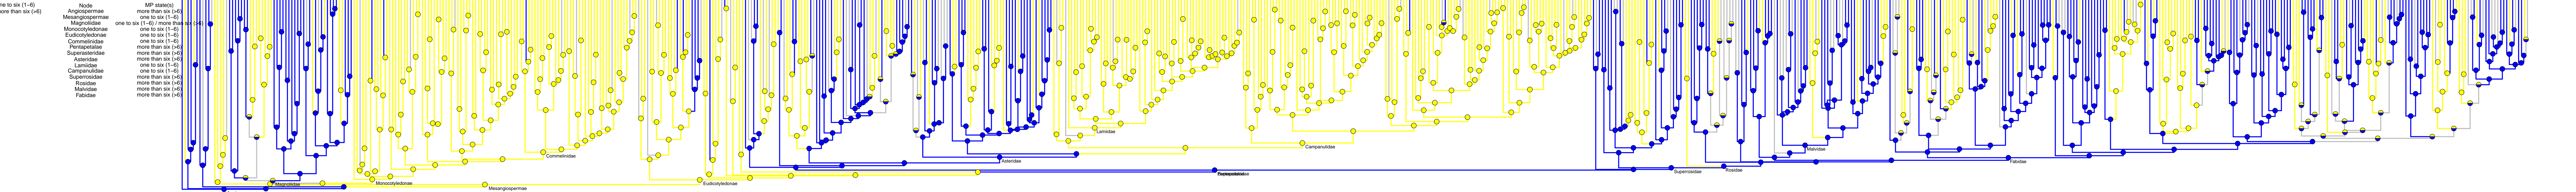

ML ancestral state reconstruction using rayDISC (R:corHMM)

301\_C. Number of fertile stamens (binary) (D2c), ARDeq model

● one to six (1-6)  
● more than six (>6)

| Node            | ML state           | Prob   |
|-----------------|--------------------|--------|
| Angiospermae    | more than six (>6) | 1      |
| Mesangiospermae | more than six (>6) | 1      |
| Magnoliidae     | more than six (>6) | 1      |
| Monocotyledonae | more than six (>6) | 0.5187 |
| Eudicotyledonae | more than six (>6) | 0.9999 |
| Commelinidae    | one to six (1-6)   | 1      |
| Pentapetalae    | more than six (>6) | 1      |
| Superasteridae  | more than six (>6) | 1      |
| Asteridae       | more than six (>6) | 0.9999 |
| Lamiidae        | one to six (1-6)   | 0.9986 |
| Campanulidae    | one to six (1-6)   | 0.9937 |
| Superrosidae    | more than six (>6) | 1      |
| Rosidae         | more than six (>6) | 1      |
| Malvidae        | more than six (>6) | 1      |
| Fabidae         | more than six (>6) | 1      |

| Model   | LogL    | Npar | AIC    | AICc   | DeltaAICc | w    | q01    | q10    |
|---------|---------|------|--------|--------|-----------|------|--------|--------|
| ARD     | -291.73 | 2    | 587.45 | 587.47 | 1.39      | 0.33 | 5e-04  | 0.0059 |
| ARDeq** | -291.03 | 2    | 586.07 | 586.08 | 0         | 0.67 | 5e-04  | 0.0059 |
| ER      | -326.45 | 1    | 654.91 | 654.91 | 68.83     | 0    | 0.0032 | 0.0032 |
| UNI01   | -366.73 | 1    | 735.46 | 735.47 | 149.39    | 0    | 0.0046 |        |
| UNI10   | -327.04 | 1    | 656.08 | 656.08 | 70        | 0    | 0.0073 |        |

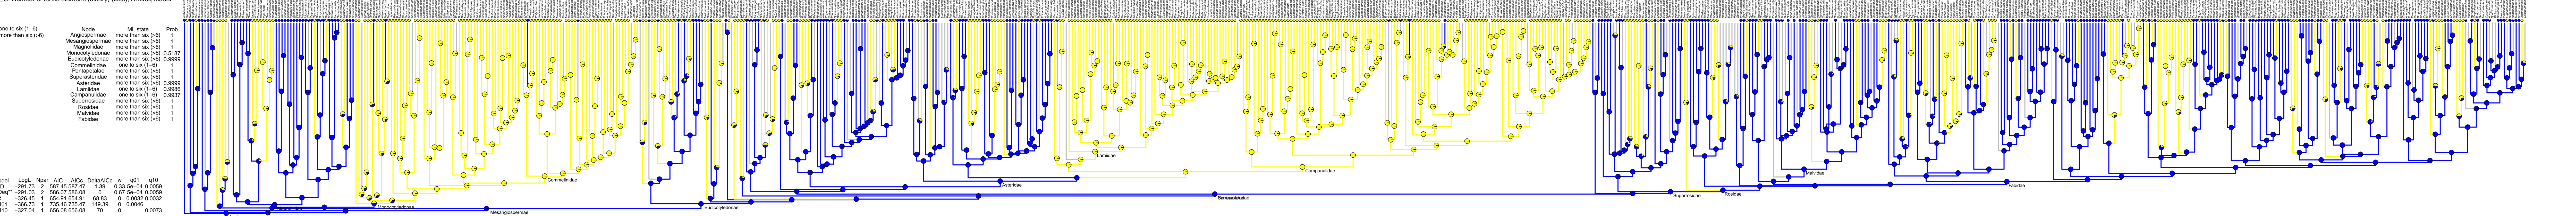

phangorn)

1. *Corollaria*  
 2. *Corollaria*  
 3. *Corollaria*  
 4. *Corollaria*  
 5. *Corollaria*  
 6. *Corollaria*  
 7. *Corollaria*  
 8. *Corollaria*  
 9. *Corollaria*  
 10. *Corollaria*  
 11. *Corollaria*  
 12. *Corollaria*  
 13. *Corollaria*  
 14. *Corollaria*  
 15. *Corollaria*  
 16. *Corollaria*  
 17. *Corollaria*  
 18. *Corollaria*  
 19. *Corollaria*  
 20. *Corollaria*  
 21. *Corollaria*  
 22. *Corollaria*  
 23. *Corollaria*  
 24. *Corollaria*  
 25. *Corollaria*  
 26. *Corollaria*  
 27. *Corollaria*  
 28. *Corollaria*  
 29. *Corollaria*  
 30. *Corollaria*  
 31. *Corollaria*  
 32. *Corollaria*  
 33. *Corollaria*  
 34. *Corollaria*  
 35. *Corollaria*  
 36. *Corollaria*  
 37. *Corollaria*  
 38. *Corollaria*  
 39. *Corollaria*  
 40. *Corollaria*  
 41. *Corollaria*  
 42. *Corollaria*  
 43. *Corollaria*  
 44. *Corollaria*  
 45. *Corollaria*  
 46. *Corollaria*  
 47. *Corollaria*  
 48. *Corollaria*  
 49. *Corollaria*  
 50. *Corollaria*  
 51. *Corollaria*  
 52. *Corollaria*  
 53. *Corollaria*  
 54. *Corollaria*  
 55. *Corollaria*  
 56. *Corollaria*  
 57. *Corollaria*  
 58. *Corollaria*  
 59. *Corollaria*  
 60. *Corollaria*  
 61. *Corollaria*  
 62. *Corollaria*  
 63. *Corollaria*  
 64. *Corollaria*  
 65. *Corollaria*  
 66. *Corollaria*  
 67. *Corollaria*  
 68. *Corollaria*  
 69. *Corollaria*  
 70. *Corollaria*  
 71. *Corollaria*  
 72. *Corollaria*  
 73. *Corollaria*  
 74. *Corollaria*  
 75. *Corollaria*  
 76. *Corollaria*  
 77. *Corollaria*  
 78. *Corollaria*  
 79. *Corollaria*  
 80. *Corollaria*  
 81. *Corollaria*  
 82. *Corollaria*  
 83. *Corollaria*  
 84. *Corollaria*  
 85. *Corollaria*  
 86. *Corollaria*  
 87. *Corollaria*  
 88. *Corollaria*  
 89. *Corollaria*  
 90. *Corollaria*  
 91. *Corollaria*  
 92. *Corollaria*  
 93. *Corollaria*  
 94. *Corollaria*  
 95. *Corollaria*  
 96. *Corollaria*  
 97. *Corollaria*  
 98. *Corollaria*  
 99. *Corollaria*  
 100. *Corollaria*

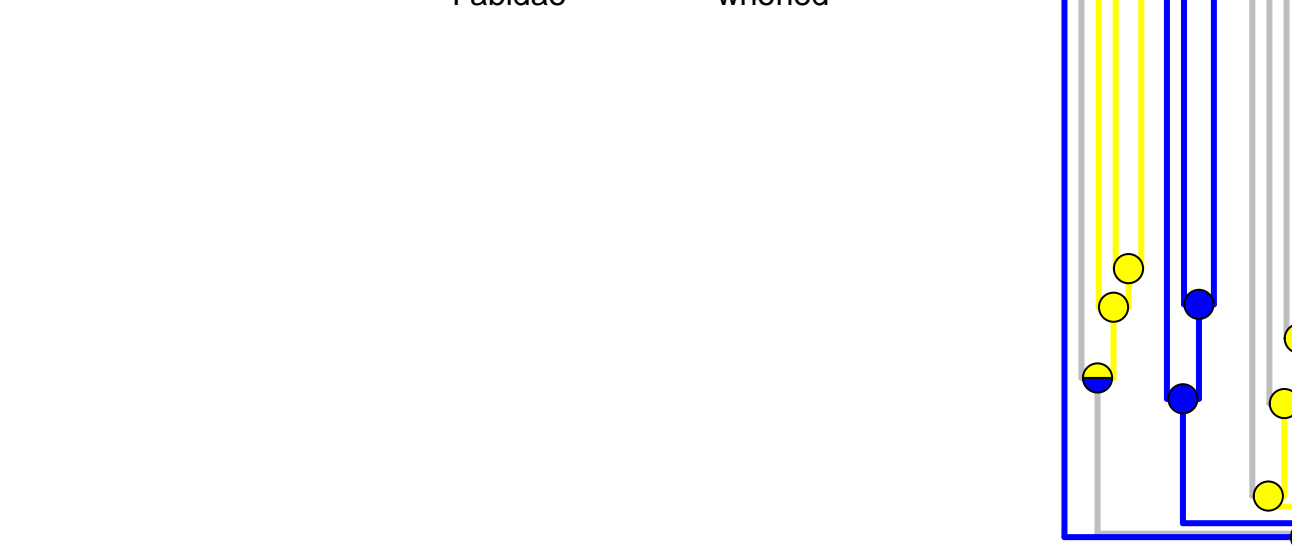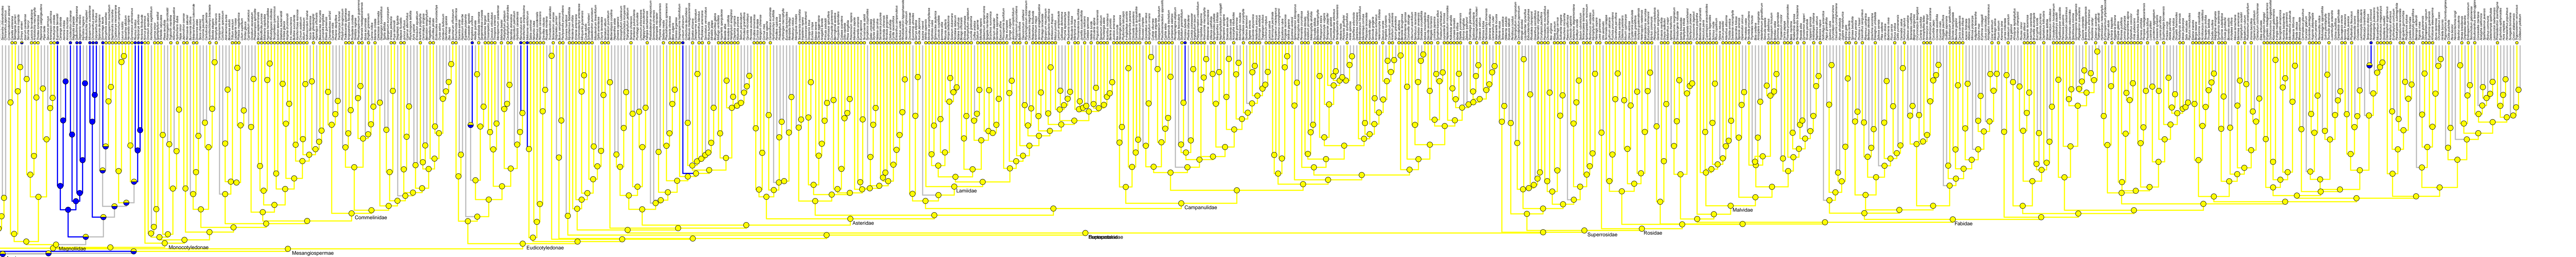

ancestral state reconstruction using rayDISC (R:corHMM)

\_ A. Androecium structural phyllotaxy (binary) (D2d), ARD model

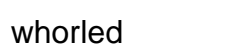

| Node          | ML state | Prob   |
|---------------|----------|--------|
| angiospermae  | spiral   | 1      |
| angiospermae  | spiral   | 0.9992 |
| agnoliidae    | spiral   | 0.9982 |
| dicotyledonae | whorled  | 0.5792 |
| dicotyledonae | spiral   | 0.9844 |
| mmelinidae    | whorled  | 0.9997 |
| entpetalae    | whorled  | 0.9975 |
| berasteridae  | whorled  | 0.9975 |
| Asteridae     | whorled  | 1      |
| Lamiidae      | whorled  | 1      |
| mpanulidae    | whorled  | 1      |
| uperrosidae   | whorled  | 0.9996 |
| Rosidae       | whorled  | 0.9997 |
| Malvidae      | whorled  | 1      |
| Fabidae       | whorled  | 1      |

| Model | LogL   | Npar | AIC    | AICc   | DeltaAICc | w    | q01   | q10    |
|-------|--------|------|--------|--------|-----------|------|-------|--------|
| LD*** | -55.27 | 2    | 114.54 | 114.55 | 0         | 0.97 | 1e-04 | 0.0087 |
| Deq   | -59.88 | 2    | 123.77 | 123.78 | 9.23      | 0.01 | 4e-04 | 0      |
| R     | -60.81 | 1    | 123.62 | 123.62 | 9.07      | 0.01 | 4e-04 | 4e-04  |
| NI01  | -60.58 | 1    | 123.16 | 123.16 | 8.61      | 0.01 | 4e-04 |        |
| NI10  | -76.52 | 1    | 155.04 | 155.04 | 40.49     | 0    |       | 0.0211 |

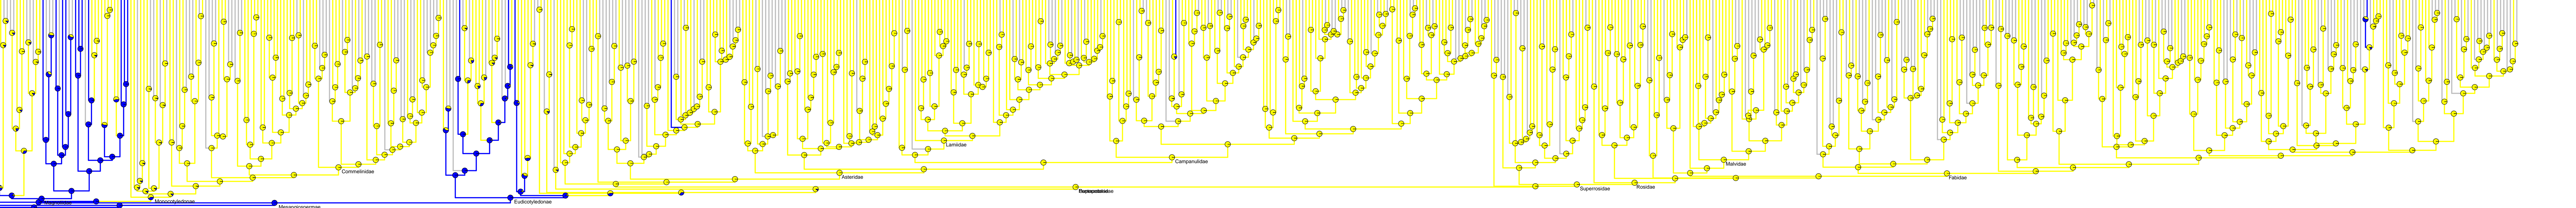

MP ancestral state reconstruction using ancestral.pars  
(R:phangorn)

331\_A. Number of androecium structural whorls (3-state) (D2c), 76 steps

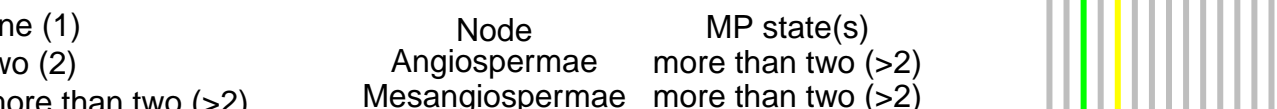

| Node            | MP state(s)        |
|-----------------|--------------------|
| Angiospermae    | more than two (>2) |
| Mesangiospermae | more than two (>2) |
| Magnoliidae     | more than two (>2) |
| Monocotyledonae | two (2)            |
| Eudicotyledonae | more than two (>2) |
| Commelinidae    | two (2)            |
| Pentapetales    | one (1)            |
| Superasteridae  | one (1)            |
| Asteridae       | one (1)            |
| Lamiidae        | one (1)            |
| Campanulidae    | one (1)            |
| Superrosidae    | one (1)            |
| Rosidae         | one (1)            |
| Malvidae        | one (1) / two (2)  |
| Fabidae         | one (1)            |

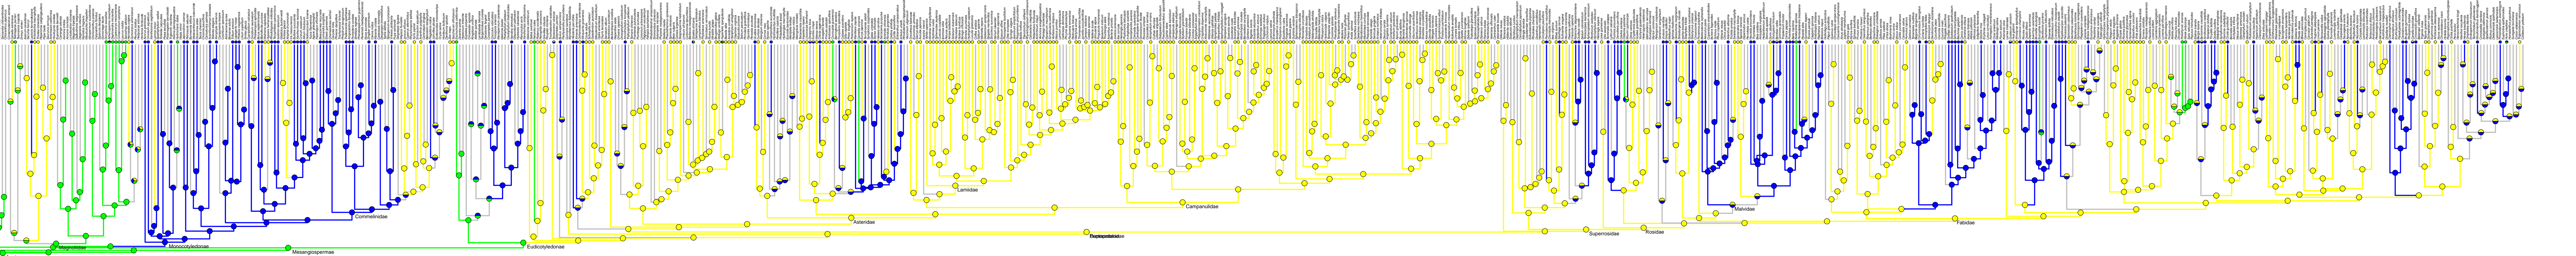

ML ancestral state reconstruction using rayDISC (R:corHMM)

331\_A. Number of androecium structural whorls (3-state) (D2c), Ordered model

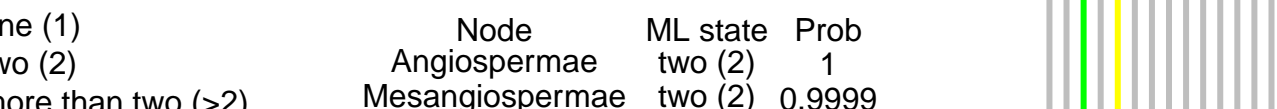

| Node            | ML state | Prob   |
|-----------------|----------|--------|
| Angiospermae    | two (2)  | 1      |
| Mesangiospermae | two (2)  | 0.9999 |
| Magnoliidae     | two (2)  | 0.9917 |
| Monocotyledonae | two (2)  | 1      |
| Eudicotyledonae | two (2)  | 1      |
| Commelinidae    | two (2)  | 1      |
| Pentapetalae    | two (2)  | 1      |
| Superasteridae  | two (2)  | 1      |
| Asteridae       | two (2)  | 1      |
| Lamiidae        | one (1)  | 0.9985 |
| Campanulidae    | one (1)  | 0.9927 |
| Superrosidae    | two (2)  | 1      |
| Rosidae         | two (2)  | 1      |
| Malvidae        | two (2)  | 1      |
| Fabidae         | two (2)  | 1      |

| Model   | LogL    | Npar | AIC    | AICc   | DeltaAICc | w    | q01    | ... |
|---------|---------|------|--------|--------|-----------|------|--------|-----|
| ARD     | -234.55 | 6    | 481.1  | 481.21 | 2.55      | 0.12 | 0      | ... |
| ARDeq   | -233.5  | 6    | 479    | 479.11 | 0.45      | 0.33 | 0      | ... |
| ER      | -282.3  | 1    | 566.59 | 566.6  | 87.93     | 0    | 0.0017 | ... |
| SYM     | -256.12 | 3    | 518.25 | 518.28 | 39.61     | 0    | 0.0035 | ... |
| SYMeq   | -255.08 | 3    | 516.15 | 516.18 | 37.52     | 0    | 0.0035 | ... |
| ORD     | -236.34 | 4    | 480.68 | 480.73 | 2.07      | 0.15 | 0      | ... |
| ORDeq*  | -235.31 | 4    | 478.61 | 478.66 | 0         | 0.41 | 0      | ... |
| ORDSYM  | -256.56 | 2    | 517.13 | 517.14 | 38.48     | 0    | 0.0036 | ... |
| ORDSYMq | -255.5  | 2    | 515    | 515.01 | 36.35     | 0    | 0.0036 | ... |
| ORDER   | -261.84 | 1    | 525.68 | 525.68 | 47.02     | 0    | 0.0029 | ... |

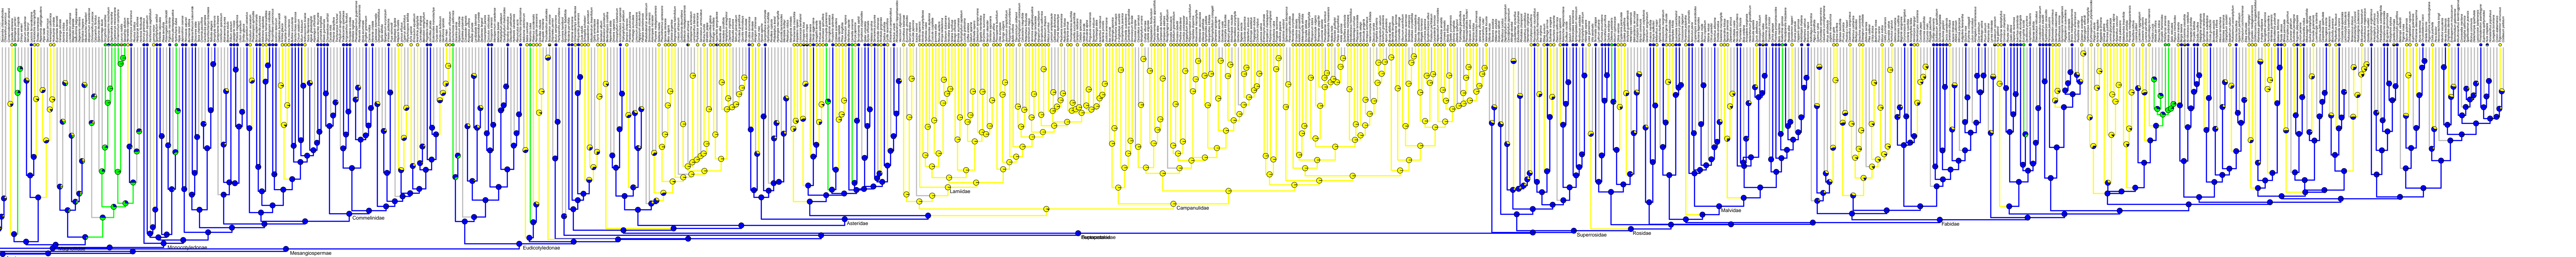

[illegible]

1 2 3 4 5 6 7 8 9 10 11 12 13 14 15 16 17 18 19 20 21 22 23 24 25 26 27 28 29 30 31 32 33 34 35 36 37 38 39 40 41 42 43 44 45 46 47 48 49 50 51 52 53 54 55 56 57 58 59 60 61 62 63 64 65 66 67 68 69 70 71 72 73 74 75 76 77 78 79 80 81 82 83 84 85 86 87 88 89 90 91 92 93 94 95 96 97 98 99 100 101 102 103 104 105 106 107 108 109 110 111 112 113 114 115 116 117 118 119 120 121 122 123 124 125 126 127 128 129 130 131 132 133 134 135 136 137 138 139 140 141 142 143 144 145 146 147 148 149 150 151 152 153 154 155 156 157 158 159 160 161 162 163 164 165 166 167 168 169 170 171 172 173 174 175 176 177 178 179 180 181 182 183 184 185 186 187 188 189 190 191 192 193 194 195 196 197 198 199 200 201 202 203 204 205 206 207 208 209 210 211 212 213 214 215 216 217 218 219 220 221 222 223 224 225 226 227 228 229 230 231 232 233 234 235 236 237 238 239 240 241 242 243 244 245 246 247 248 249 250 251 252 253 254 255 256 257 258 259 260 261 262 263 264 265 266 267 268 269 270 271 272 273 274 275 276 277 278 279 280 281 282 283 284 285 286 287 288 289 290 291 292 293 294 295 296 297 298 299 300 301 302 303 304 305 306 307 308 309 310 311 312 313 314 315 316 317 318 319 320 321 322 323 324 325 326 327 328 329 330 331 332 333 334 335 336 337 338 339 340 341 342 343 344 345 346 347 348 349 350 351 352 353 354 355 356 357 358 359 360 361 362 363 364 365 366 367 368 369 370 371 372 373 374 375 376 377 378 379 380 381 382 383 384 385 386 387 388 389 390 391 392 393 394 395 396 397 398 399 400 401 402 403 404 405 406 407 408 409 410 411 412 413 414 415 416 417 418 419 420 421 422 423 424 425 426 427 428 429 430 431 432 433 434 435 436 437 438 439 440 441 442 443 444 445 446 447 448 449 450 451 452 453 454 455 456 457 458 459 460 461 462 463 464 465 466 467 468 469 470 471 472 473 474 475 476 477 478 479 480 481 482 483 484 485 486 487 488 489 490 491 492 493 494 495 496 497 498 499 500 501 502 503 504 505 506 507 508 509 510 511 512 513 514 515 516 517 518 519 520 521 522 523 524 525 526 527 528 529 530 531 532 533 534 535 536 537 538 539 540 541 542 543 544 545 546 547 548 549 550 551 552 553 554 555 556 557 558 559 560 561 562 563 564 565 566 567 568 569 570 571 572 573 574 575 576 577 578 579 580 581 582 583 584 585 586 587 588 589 590 591 592 593 594 595 596 597 598 599 600 601 602 603 604 605 606 607 608 609 610 611 612 613 614 615 616 617 618 619 620 621 622 623 624 625 626 627 628 629 630 631 632 633 634 635 636 637 638 639 640 641 642 643 644 645 646 647 648 649 650 651 652 653 654 655 656 657 658 659 660 661 662 663 664 665 666 667 668 669 670 671 672 673 674 675 676 677 678 679 680 681 682 683 684 685 686 687 688 689 690 691 692 693 694 695 696 697 698 699 700 701 702 703 704 705 706 707 708 709 710 711 712 713 714 715 716 717 718 719 720 721 722 723 724 725 726 727 728 729 730 731 732 733 734 735 736 737 738 739 740 741 742 743 744 745 746 747 748 749 750 751 752 753 754 755 756 757 758 759 760 761 762 763 764 765 766 767 768 769 770 771 772 773 774 775 776 777 778 779 780 781 782 783 784 785 786 787 788 789 790 791 792 793 794 795 796 797 798 799 800 801 802 803 804 805 806 807 808 809 810 811 812 813 814 815 816 817 818 819 820 821 822 823 824 825 826 827 828 829 830 831 832 833 834 835 836 837 838 839 840 841 842 843 844 845 846 847 848 849 850 851 852 853 854 855 856 857 858 859 860 861 862 863 864 865 866 867 868 869 870 871 872 873 874 875 876 877 878 879 880 881 882 883 884 885 886 887 888 889 890 891 892 893 894 895 896 897 898 899 900 901 902 903 904 905 906 907 908 909 910 911 912 913 914 915 916 917 918 919 920 921 922 923 924 925 926 927 928 929 930 931 932 933 934 935 936 937 938 939 940 941 942 943 944 945 946 947 948 949 950 951 952 953 954 955 956 957 958 959 960 961 962 963 964 965 966 967 968 969 970 971 972 973 974 975 976 977 978 979 980 981 982 983 984 985 986 987 988 989 990 991 992 993 994 995 996 997 998 999 1000 1001 1002 1003 1004 1005 1006 1007 1008 1009 1010 1011 1012 1013 1014 1015 1016 1017 1018 1019 1020 1021 1022 1023 1024 1025 1026 1027 1028 1029 1030 1031 1032 1033 1034 1035 1036 1037 1038 1039 104

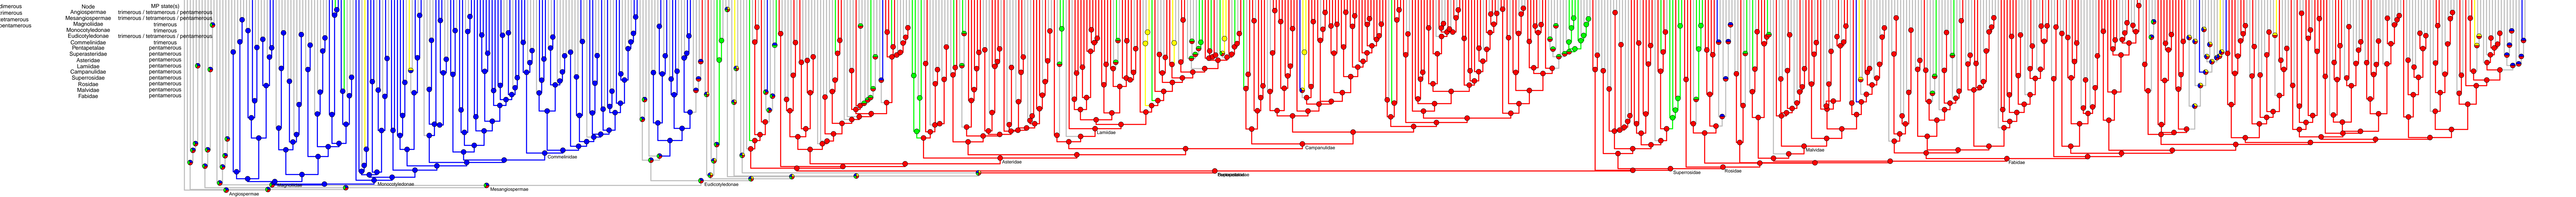

ML ancestral state reconstruction using rayDISC (R:corHMM)

332\_A. Androecium structural merism (4-state) (D2c), ORD model

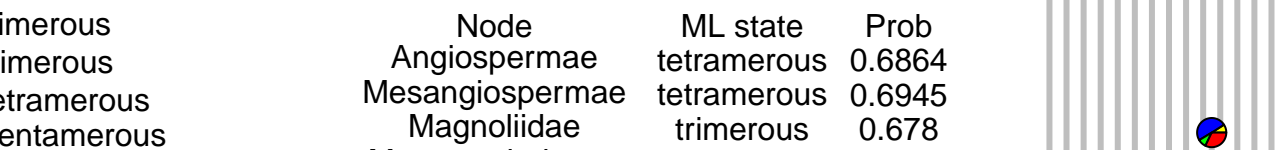

| Node            | ML state    | Prob   |
|-----------------|-------------|--------|
| Angiospermae    | tetramerous | 0.6864 |
| Mesangiospermae | tetramerous | 0.6945 |
| Magnoliidae     | trimerous   | 0.678  |
| Monocotyledonae | trimerous   | 0.7897 |
| Eudicotyledonae | tetramerous | 0.9312 |
| Commelinidae    | trimerous   | 0.8452 |
| Pentapetalae    | pentamerous | 0.9708 |
| Superasteridae  | pentamerous | 0.9708 |
| Asteridae       | pentamerous | 0.9957 |
| Lamiidae        | pentamerous | 0.9885 |
| Campanulidae    | pentamerous | 0.9991 |
| Superrosidae    | pentamerous | 0.9908 |
| Rosidae         | pentamerous | 0.9938 |
| Malvidae        | pentamerous | 0.994  |
| Fabidae         | pentamerous | 0.9998 |

| Model   | LogL    | Npar | AIC    | AICc   | DeltaAICc | w    | q01     | ... |
|---------|---------|------|--------|--------|-----------|------|---------|-----|
| ARD     | -223.55 | 12   | 471.09 | 471.49 | 22.1      | 0    | 0.0072  | ... |
| ARDeq   | -222.25 | 12   | 468.5  | 468.9  | 19.51     | 0    | 0.0071  | ... |
| ER      | -237.25 | 1    | 476.49 | 476.5  | 27.11     | 0    | 8e-04   | ... |
| SYM     | -225.32 | 6    | 462.63 | 462.74 | 13.35     | 0    | 5e-04   | ... |
| SYMeq   | -224.01 | 6    | 460.02 | 460.13 | 10.75     | 0    | 5e-04   | ... |
| ORD**   | -218.64 | 6    | 449.28 | 449.39 | 0         | 0.99 | 15.4031 | ... |
| ORDSYM  | -236.42 | 6    | 484.84 | 484.95 | 35.56     | 0    | 11.9257 | ... |
| ORDSYMq | -259.9  | 3    | 525.81 | 525.84 | 76.45     | 0    | 0.0021  | ... |
| ORDER   | -258.72 | 3    | 523.45 | 523.48 | 74.09     | 0    | 0.0021  | ... |
| ORDER   | -260.67 | 1    | 523.34 | 523.34 | 73.95     | 0    | 0.0031  | ... |

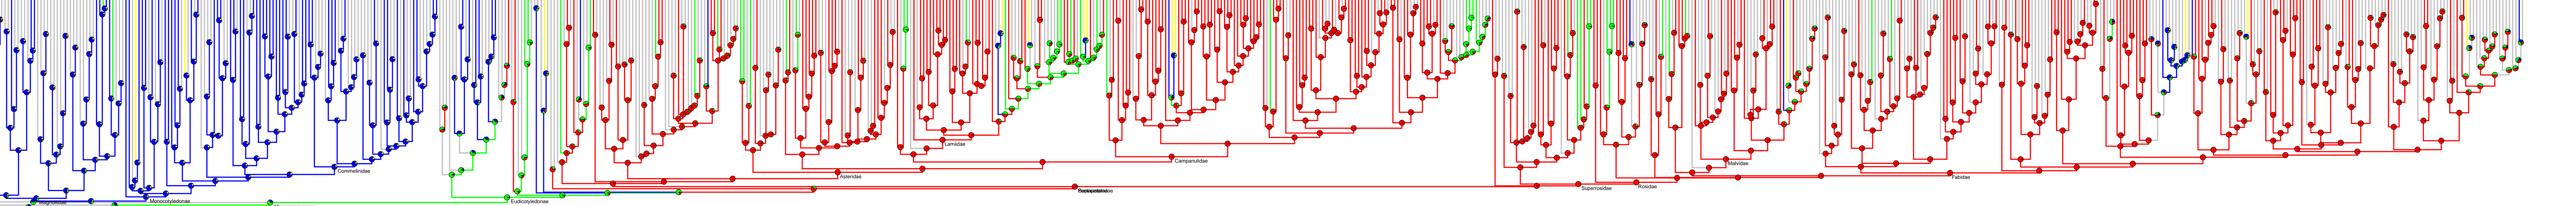

MP ancestral state reconstruction using ancestral.pars

(R:phangorn)

332\_B. Androecium structural merism (3-state) (D2c), 48 steps

● trimerous  
● tetramerous  
● pentamerous

Node  
Angiospermae  
Mesangiospermae  
Magnoliidae  
Monocotyledonae  
Eudicotyledonae  
Commelinidae  
Pentapetales  
Superasteridae  
Asteridae  
Lamiidae  
Campanulidae  
Superrosidae  
Rosidae  
Malvidae  
Fabidae

MP state(s)  
trimerous / tetramerous / pentamerous  
trimerous / tetramerous / pentamerous  
trimerous  
trimerous / tetramerous / pentamerous  
trimerous  
pentamerous  
pentamerous  
pentamerous  
pentamerous  
pentamerous  
pentamerous  
pentamerous

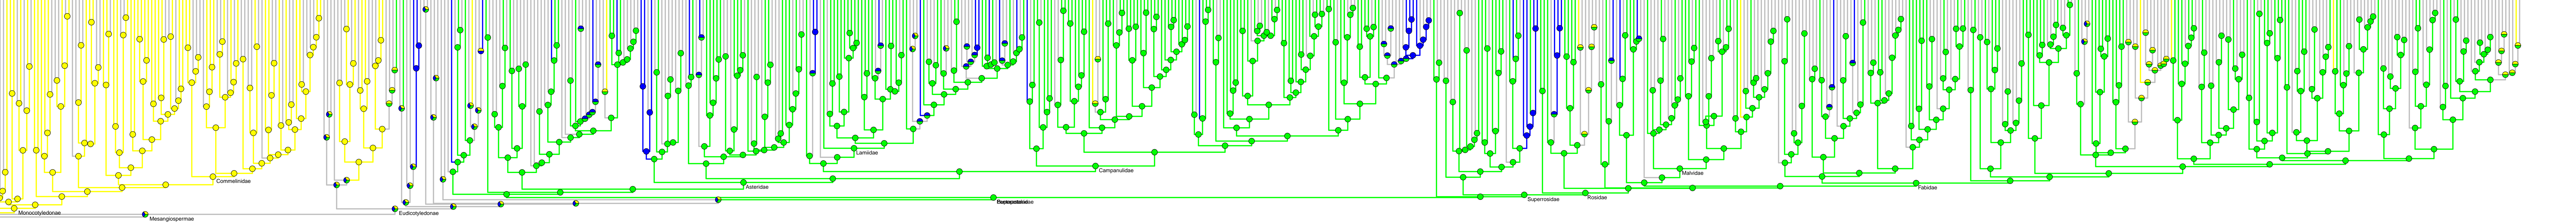

32 B. Androecium structural merism (3-state) (D2c) SYMeg model

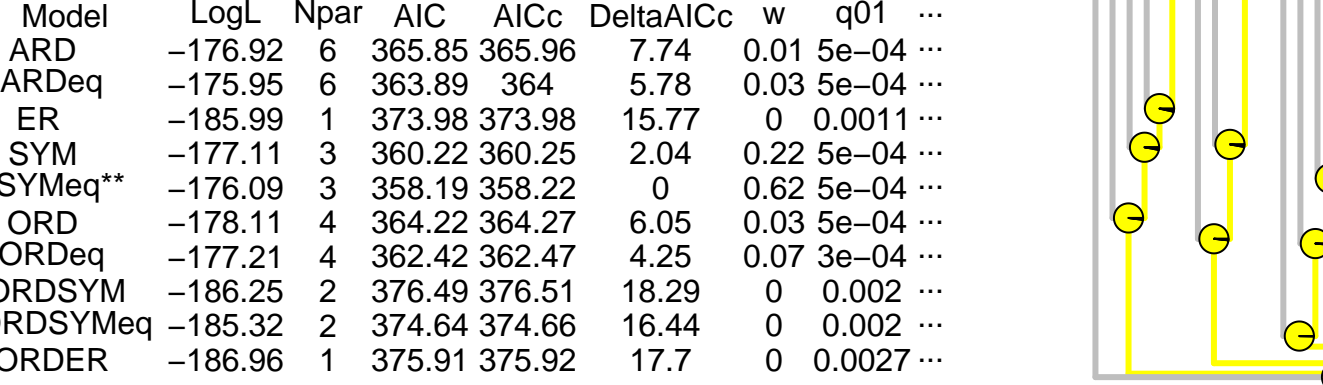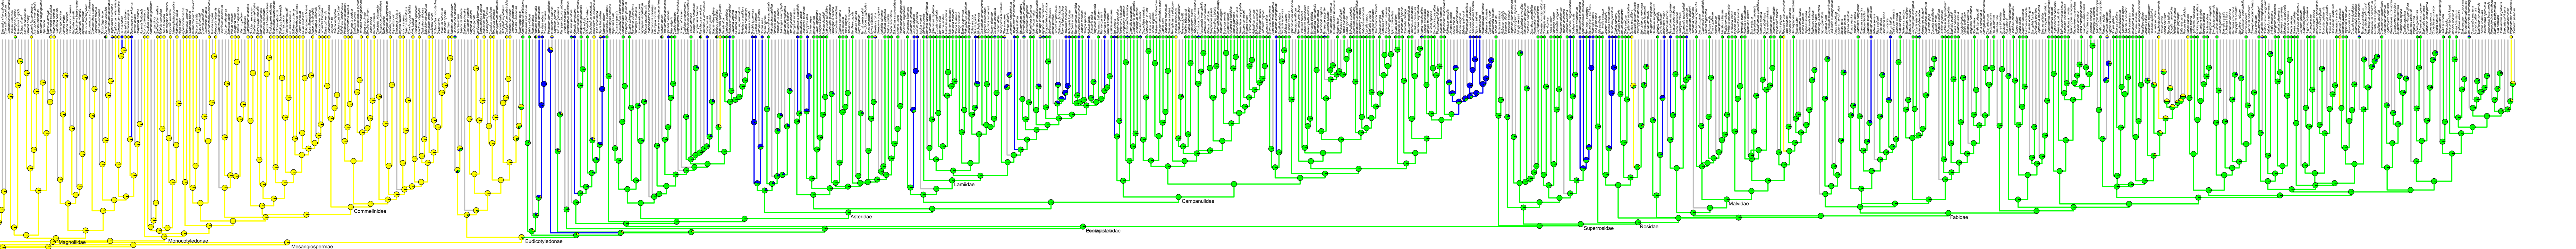



ML ancestral state reconstruction using rayDISC (R:corHMM)  
305\_A. Filament (binary) (D2d), ARDeq model

● laminar (wide)  
● typical (narrow)

| Node            | ML state         | Prob   |
|-----------------|------------------|--------|
| Angiospermae    | laminar (wide)   | 1      |
| Mesangiospermae | laminar (wide)   | 0.9953 |
| Magnoliidae     | laminar (wide)   | 0.9978 |
| Monocotyledonae | laminar (wide)   | 0.851  |
| Eudicotyledonae | typical (narrow) | 0.5337 |
| Commelinidae    | laminar (wide)   | 0.6355 |
| Pentapetales    | typical (narrow) | 0.9981 |
| Superasteridae  | typical (narrow) | 0.9981 |
| Asteridae       | typical (narrow) | 0.9995 |
| Lamiidae        | typical (narrow) | 0.9971 |
| Campanulidae    | typical (narrow) | 0.9945 |
| Superrosidae    | typical (narrow) | 0.9991 |
| Rosidae         | typical (narrow) | 0.9993 |
| Malvidae        | typical (narrow) | 0.997  |
| Fabidae         | typical (narrow) | 1      |

| Model   | LogL    | Npar | AIC    | AICc   | DeltaAICc | w    | q01    | q10    |
|---------|---------|------|--------|--------|-----------|------|--------|--------|
| ARD     | -173.1  | 2    | 350.21 | 350.22 | 1.32      | 0.34 | 0.0092 | 0.0022 |
| ARDeq** | -172.45 | 2    | 348.89 | 348.91 | 0         | 0.66 | 0.0093 | 0.0021 |
| ER      | -178.67 | 1    | 359.33 | 359.34 | 10.43     | 0    | 0.0024 | 0.0024 |
| UNI01   | -184.89 | 1    | 371.78 | 371.78 | 22.88     | 0    | 0      | 0.0147 |
| UNI10   | -187.98 | 1    | 377.95 | 377.96 | 29.05     | 0    |        | 0.0023 |

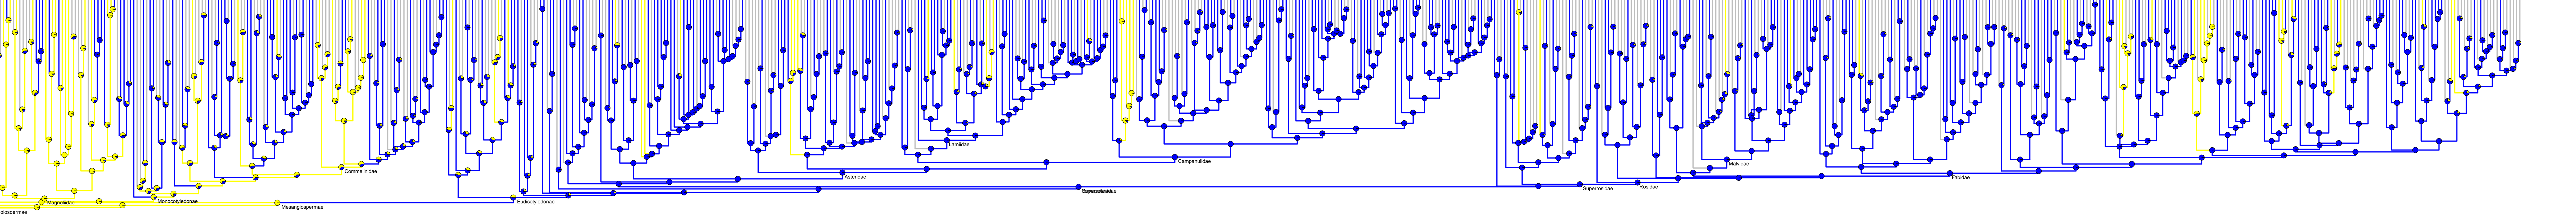

MP ancestral state reconstruction using *ancestral.pars*  
(R:phangorn)  
311\_A. Anther orientation (D2d), 110 steps

● introrse  
● latrorse  
● extrorse

Node MP state(s)  
Angiospermae introrse / extrorse  
Mesangiospermae introrse / extrorse  
Magnoliidae introrse / extrorse  
Monocotyledonae introrse / extrorse  
Eudicotyledonae introrse / extrorse  
Commelinidae introrse / extrorse  
Pentapetales introrse / extrorse  
Superasteridae introrse / extrorse  
Asteridae introrse / extrorse  
Lamiidae introrse / extrorse  
Campanulidae introrse / extrorse  
Superrosidae introrse / extrorse  
Rosidae introrse / extrorse  
Malvidae introrse / extrorse  
Fabidae introrse / extrorse

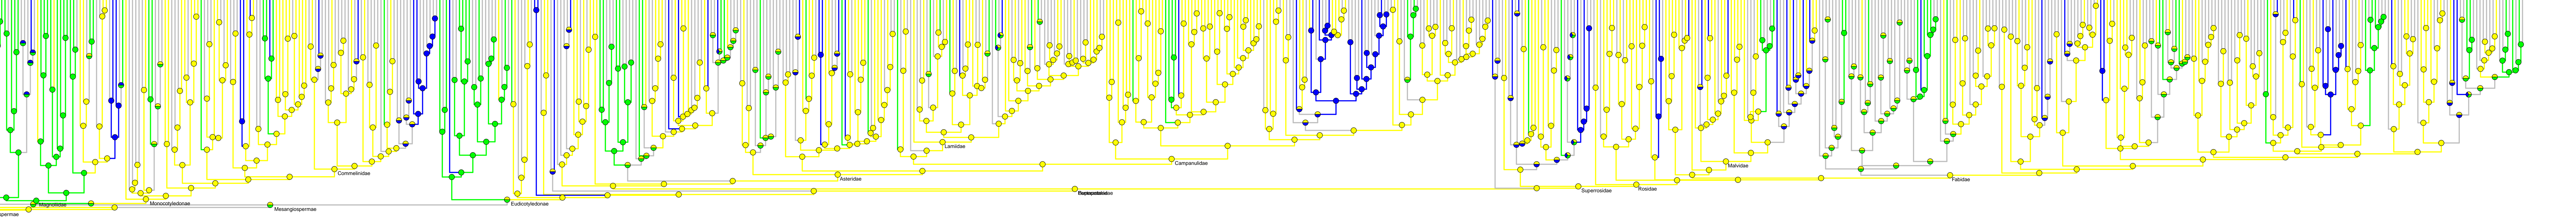

ML ancestral state reconstruction using rayDISC (R:corHMM)  
311\_A. Anther orientation (D2D), SYMeq model

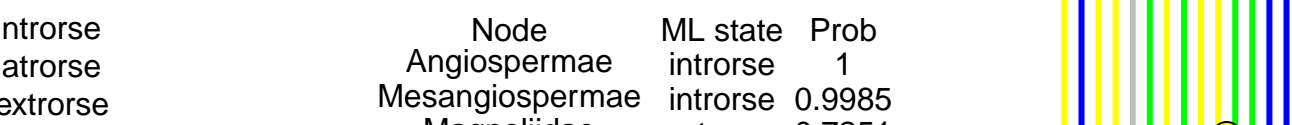

| Node            | ML state | Prob   |
|-----------------|----------|--------|
| Angiospermae    | introrse | 1      |
| Mesangiospermae | introrse | 0.9985 |
| Magnoliidae     | extrorse | 0.7251 |
| Monocotyledonae | introrse | 0.9939 |
| Eudicotyledonae | introrse | 0.9978 |
| Commelinidae    | introrse | 0.9946 |
| Pentapetales    | introrse | 1      |
| Superasteridae  | introrse | 1      |
| Asteridae       | introrse | 0.9997 |
| Lamiidae        | introrse | 0.9997 |
| Campanulidae    | introrse | 1      |
| Superrosidae    | introrse | 1      |
| Rosidae         | introrse | 1      |
| Malvidae        | introrse | 0.9998 |
| Fabidae         | introrse | 0.9998 |

| Model  | LogL    | Npar | AIC    | AICc   | DeltaAICc | w    | q01    | ... |
|--------|---------|------|--------|--------|-----------|------|--------|-----|
| ARD    | -345.51 | 6    | 703.02 | 703.13 | 2.66      | 0.09 | 0.0021 | ... |
| ARDeq  | -344.7  | 6    | 701.39 | 701.5  | 1.03      | 0.2  | 0.0038 | ... |
| ER     | -349.52 | 1    | 701.05 | 701.05 | 0.59      | 0.25 | 0.0028 | ... |
| SYM    | -348.28 | 3    | 702.56 | 702.59 | 2.12      | 0.12 | 0.0031 | ... |
| SYMeq* | -347.22 | 3    | 700.44 | 700.47 | 0         | 0.34 | 0.0031 | ... |

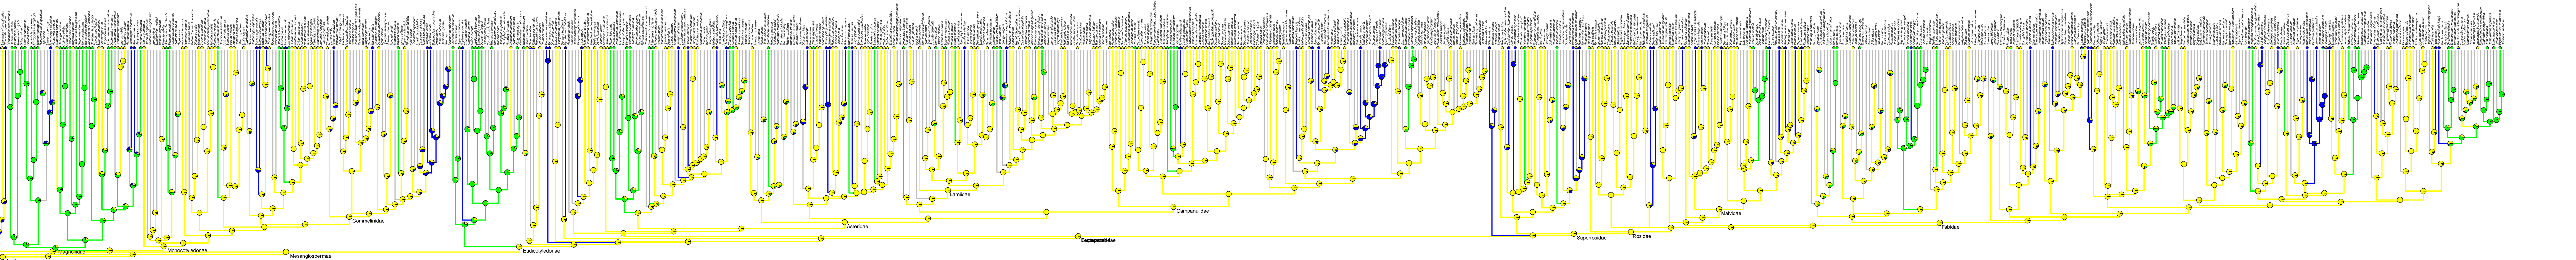

ancestral state reconstruction using ancestral.pars  
(phangorn)

A. Anther attachment (binary) (D2d), 96 steps

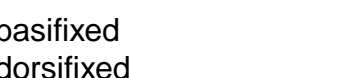

|         | MP state(s)            |
|---------|------------------------|
| ermæe   | basifixed              |
| spermae | basifixed              |
| lidæe   | basifixed              |
| ledonæe | basifixed              |
| edonæe  | basifixed              |
| inidæe  | basifixed              |
| etalæe  | basifixed              |
| teridæe | basifixed              |
| dæe     | basifixed              |
| dæe     | basifixed              |
| ulidæe  | basifixed / dorsifixed |
| osidæe  | basifixed              |
| dæe     | dorsifixed             |
| dæe     | dorsifixed             |
| dæe     | dorsifixed             |

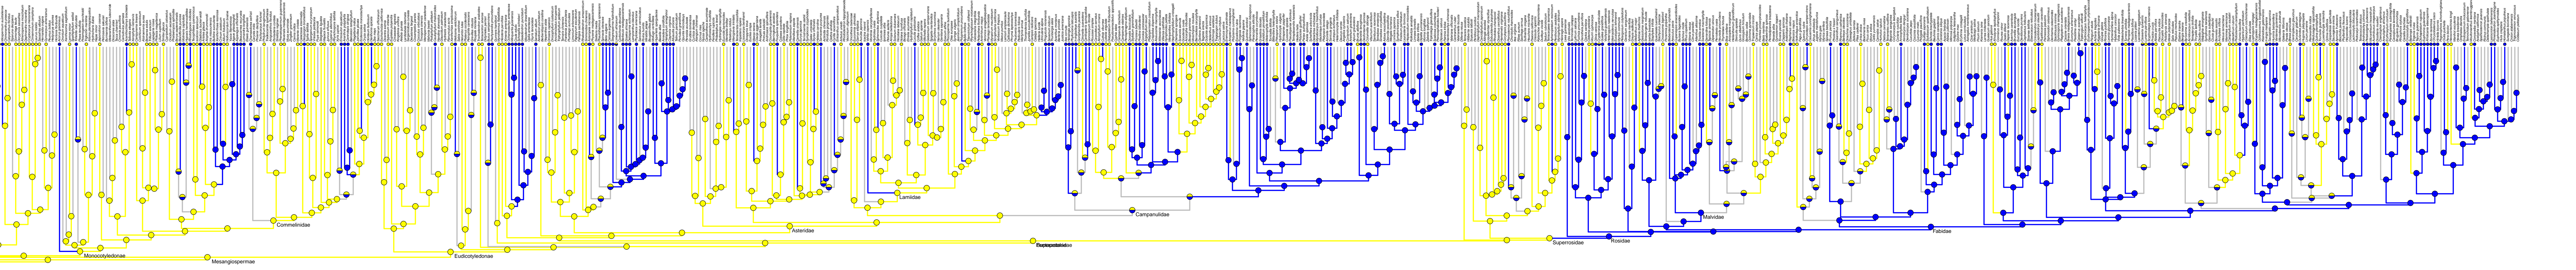

ML ancestral state reconstruction using rayDISC (R:corHMM)  
312\_A. Anther attachment (binary) (D2d), ARDeq model

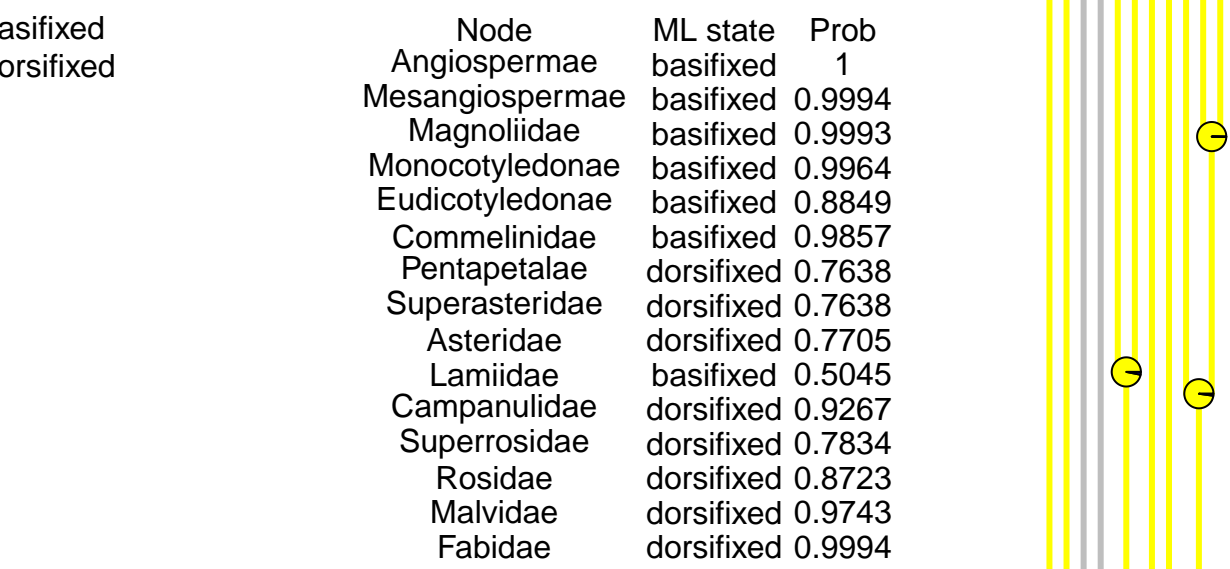

| Model   | LogL    | Npar | AIC    | AICc   | DeltaAICc | w    | q01    | q10    |
|---------|---------|------|--------|--------|-----------|------|--------|--------|
| ARD     | -265.7  | 2    | 535.4  | 535.41 | 1.34      | 0.27 | 0.0045 | 0.0073 |
| ARDeq** | -265.03 | 2    | 534.06 | 534.08 | 0         | 0.53 | 0.0045 | 0.0073 |
| ER      | -266.99 | 1    | 535.98 | 535.99 | 1.91      | 0.2  | 0.0055 | 0.0055 |
| UNI01   | -292.69 | 1    | 587.37 | 587.38 | 53.3      | 0    | 0.0051 |        |
| UNI10   | -277.87 | 1    | 557.73 | 557.74 | 23.66     | 0    | 0.008  |        |

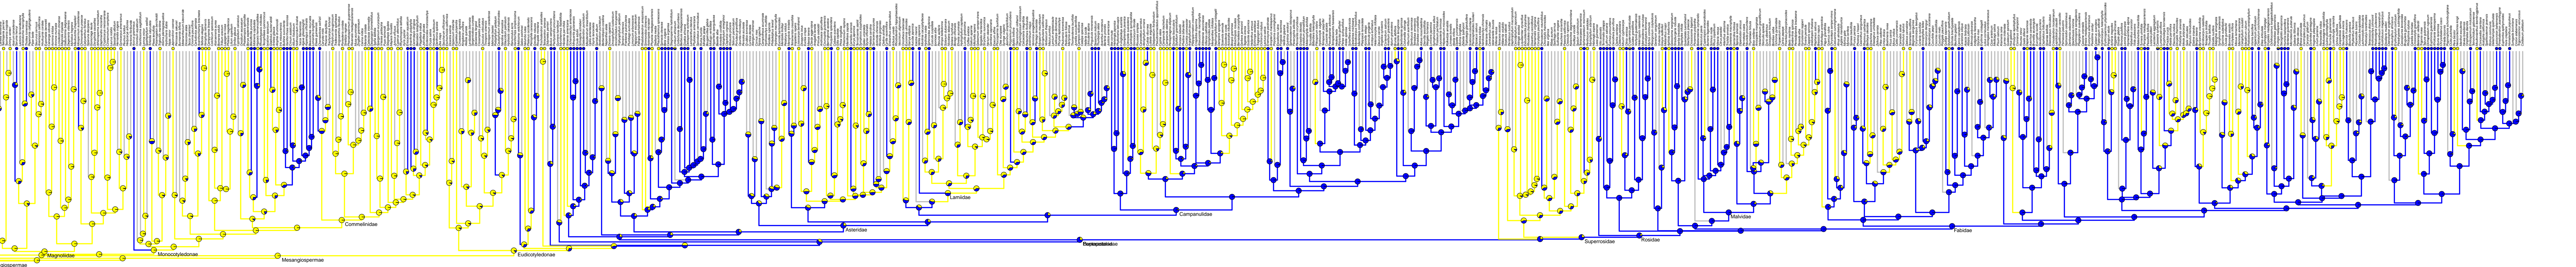

# MP ancestral state reconstruction using ancestral.pars

(R:phangorn)  
313\_A. Anther dehiscence (3-state) (D2d), 10 steps

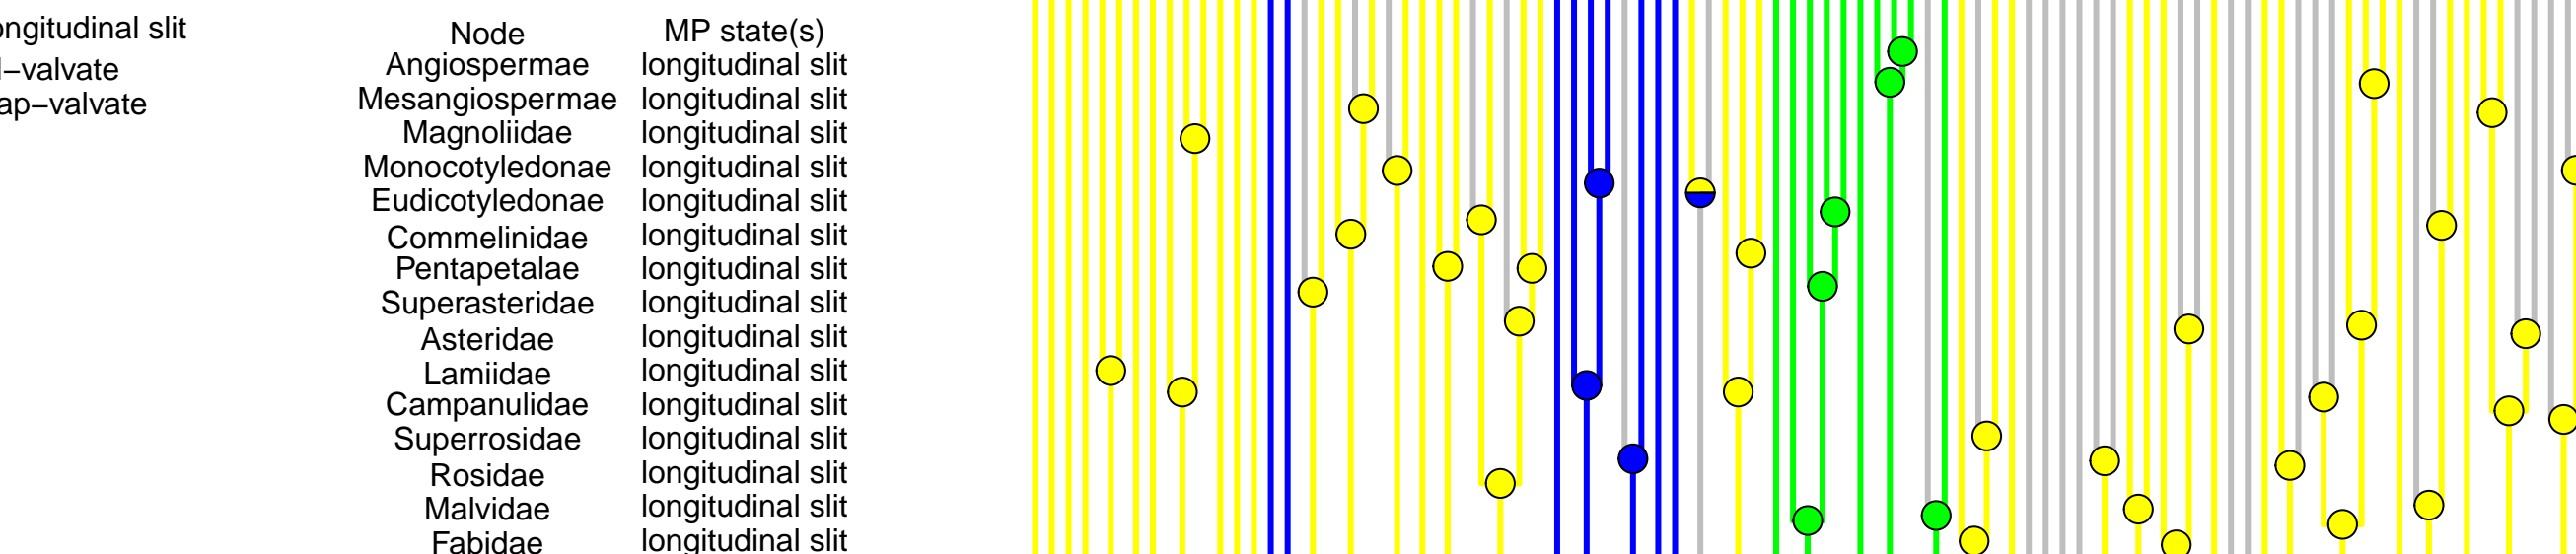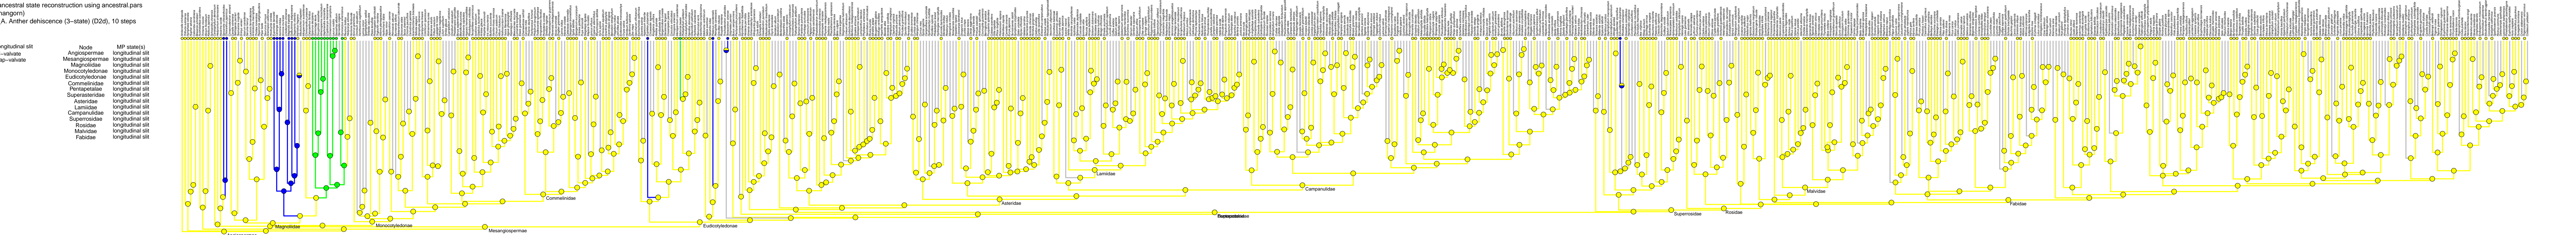

ancestral state reconstruction using rayDISC (R:corHMM) 3\_A. Anther dehiscence (3–state) (D2d), ARdeg model

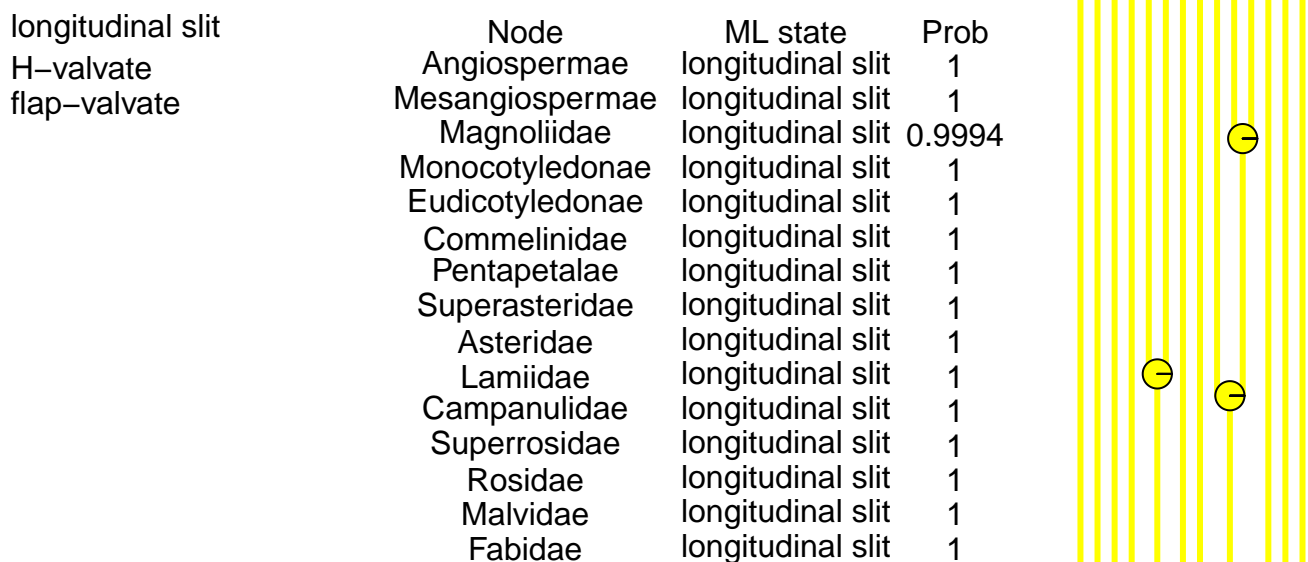

| Model | LogL   | Npar | AIC    | AICc   | DeltaAICc | w    | q01   | ... |
|-------|--------|------|--------|--------|-----------|------|-------|-----|
| RD    | -56.78 | 6    | 125.55 | 125.66 | 2.19      | 0.13 | 2e-04 | ... |
| Deq*  | -55.68 | 6    | 123.36 | 123.47 | 0         | 0.38 | 2e-04 | ... |
| R     | -61.41 | 1    | 124.81 | 124.82 | 1.35      | 0.2  | 2e-04 | ... |
| /M    | -60.38 | 3    | 126.77 | 126.8  | 3.33      | 0.07 | 2e-04 | ... |
| Meq   | -59.29 | 3    | 124.57 | 124.6  | 1.14      | 0.22 | 2e-04 | ... |

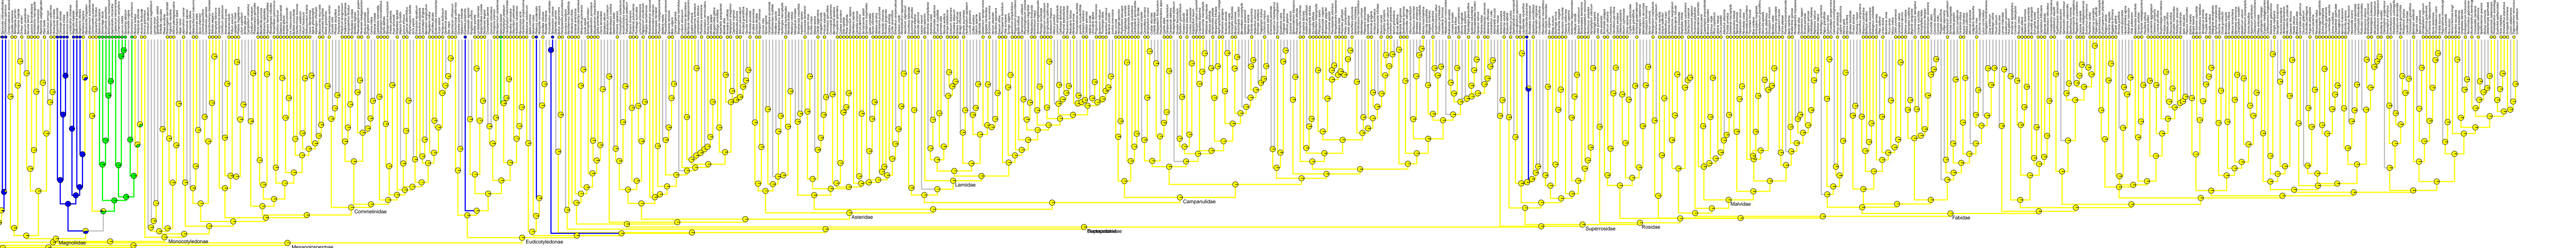

MP ancestral state reconstruction using ancestral.pars  
(R:phangorn)

401\_B. Number of structural carpels (5-state) (D2c), 187 steps

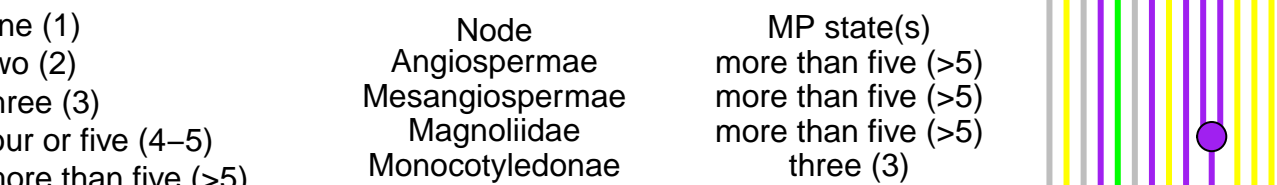

- Node
- Angiospermae
- Mesangiospermae
- Magnoliidae
- Monocotyledonae
- Eudicotyledonae
- Commelinidae
- Pentapetalae
- Superasteridae
- Asteridae
- Lamiidae
- Campanulidae
- Superrosidae
- Rosidae
- Malvidae
- Fabidae

- MP state(s)
- more than five (>5)
- more than five (>5)
- more than five (>5)
- three (3)
- more than five (>5)
- three (3)
- three (3) / four or five (4-5)
- two (2) / four or five (4-5)
- two (2)
- two (2)
- three (3) / four or five (4-5)
- three (3) / four or five (4-5)
- four or five (4-5)
- four or five (4-5)

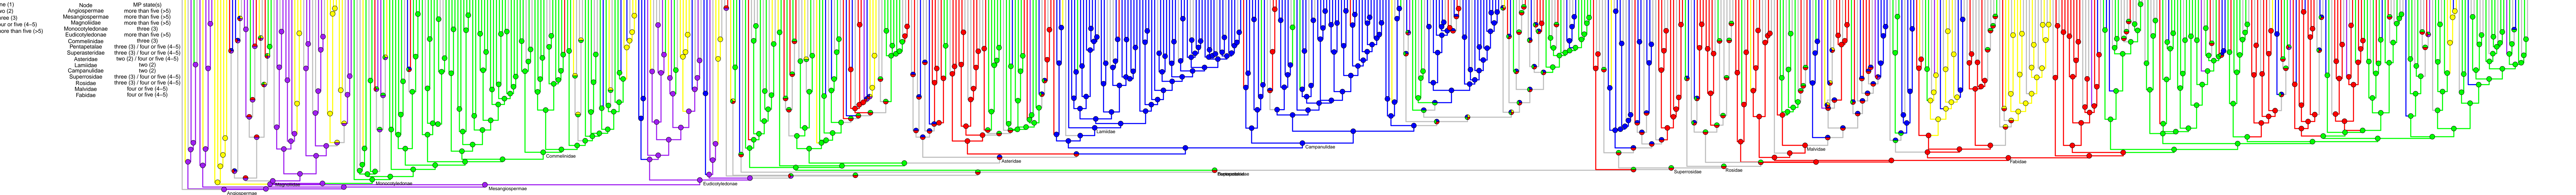

# ML ancestral state reconstruction using rayDISC (R:corHMM)

## 401\_B. Number of structural carpels (5-state) (D2c), ARDeq model

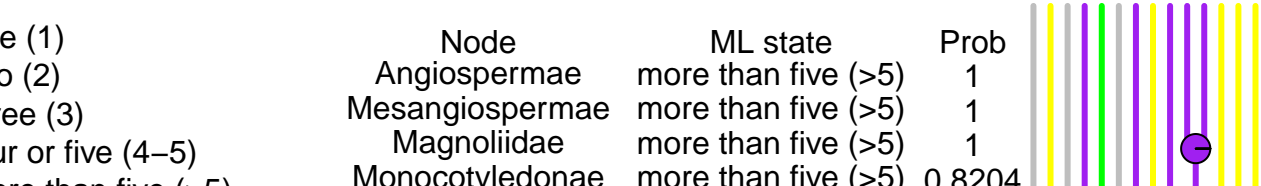

| Model   | LogL    | Npar | AIC     | AICc    | DeltaAICc | w    | q01    | ... |
|---------|---------|------|---------|---------|-----------|------|--------|-----|
| ARD     | -665.28 | 20   | 1370.55 | 1371.64 | 3.22      | 0.17 | 0.0017 | ... |
| ARDeq** | -663.67 | 20   | 1367.33 | 1368.42 | 0         | 0.83 | 0.0017 | ... |
| ER      | -720.04 | 1    | 1442.09 | 1442.09 | 73.67     | 0    | 0.0016 | ... |
| SYM     | -686.43 | 10   | 1392.85 | 1393.13 | 24.71     | 0    | 8e-04  | ... |
| SYMeq   | -684.89 | 10   | 1389.77 | 1390.05 | 21.63     | 0    | 8e-04  | ... |
| ORD     | -760.36 | 8    | 1536.72 | 1536.9  | 168.48    | 0    | 0.001  | ... |
| ORDeq   | -758.84 | 8    | 1533.69 | 1533.87 | 165.45    | 0    | 0.001  | ... |
| ORDSYM  | -764.3  | 4    | 1536.59 | 1536.64 | 168.22    | 0    | 0.0042 | ... |
| ORDSYMq | -762.85 | 4    | 1533.7  | 1533.75 | 165.33    | 0    | 0.0042 | ... |
| ORDER   | -769.83 | 1    | 1541.66 | 1541.67 | 173.25    | 0    | 0.0058 | ... |

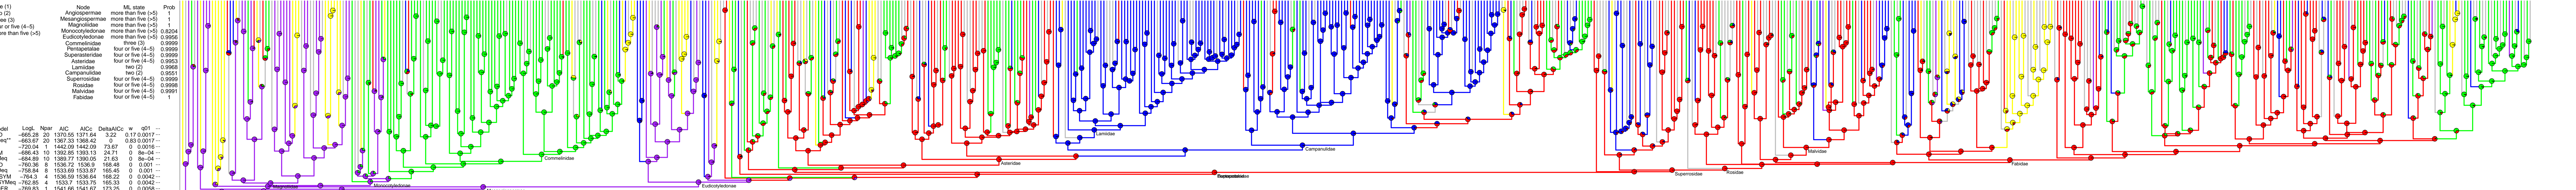

ancestral state reconstruction using ancestral.pars  
(phangorn)

\_A. Gynoecium phyllotaxy (D2d), 10 steps

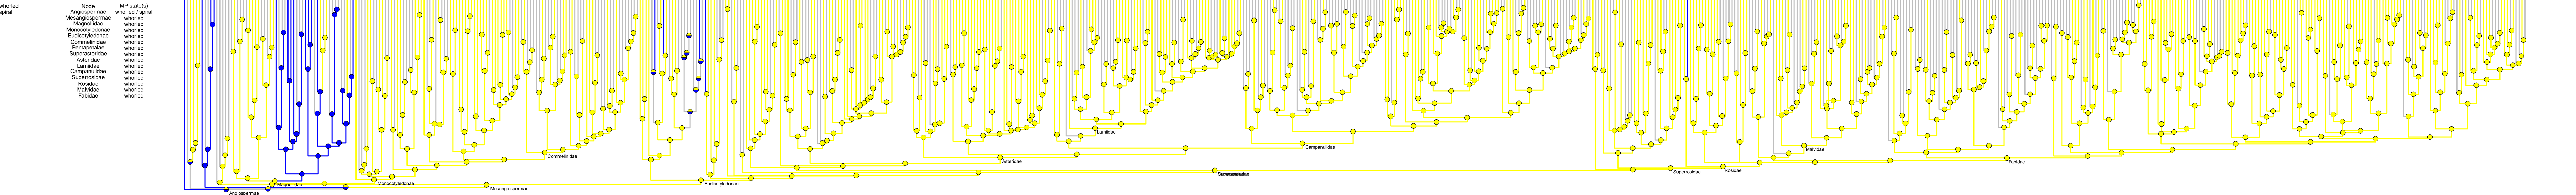

ML ancestral state reconstruction using rayDISC (R:corHMM)  
400\_A. Gynoecium phylotaxy (D2d), ARDeq model

● whorled  
● spiral

| Node            | ML state | Prob   |
|-----------------|----------|--------|
| Angiospermae    | spiral   | 1      |
| Mesangiospermae | spiral   | 1      |
| Magnoliidae     | spiral   | 0.9997 |
| Monocotyledonae | whorled  | 0.5317 |
| Eudicotyledonae | spiral   | 0.9997 |
| Commelinidae    | whorled  | 0.9997 |
| Pentapetalae    | whorled  | 0.9746 |
| Superasteridae  | whorled  | 0.9746 |
| Asteridae       | whorled  | 1      |
| Lamiidae        | whorled  | 1      |
| Campanulidae    | whorled  | 1      |
| Superrosidae    | whorled  | 0.9775 |
| Rosidae         | whorled  | 0.9777 |
| Malvidae        | whorled  | 1      |
| Fabidae         | whorled  | 1      |

| Model   | LogL   | Npar | AIC    | AICc   | DeltaAICc | w    | q01   | q10    |
|---------|--------|------|--------|--------|-----------|------|-------|--------|
| ARD     | -39.73 | 2    | 83.46  | 83.48  | 1.39      | 0.31 | 1e-04 | 0.0083 |
| ARDeq** | -39.04 | 2    | 82.07  | 82.09  | 0         | 0.62 | 1e-04 | 0.0083 |
| ER      | -51.33 | 1    | 104.66 | 104.66 | 22.57     | 0    | 4e-04 | 4e-04  |
| UNI01   | -52.95 | 1    | 107.89 | 107.9  | 25.81     | 0    | 4e-04 |        |
| UNI10   | -42.27 | 1    | 86.55  | 86.55  | 4.46      | 0.07 |       | 0.0098 |

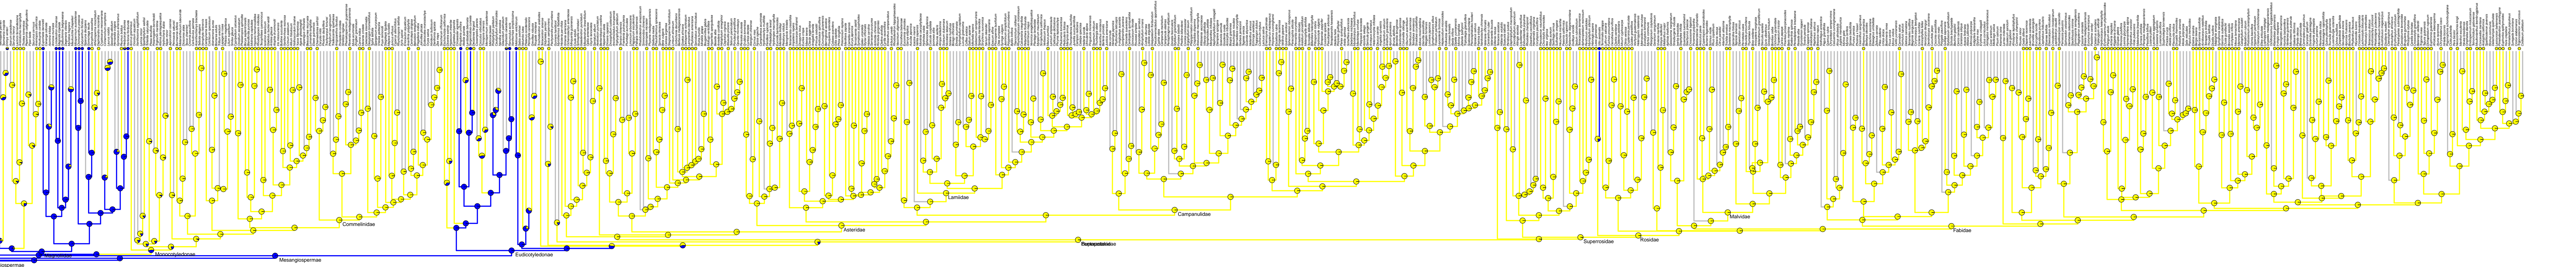

ancestral state reconstruction using ancestral.pars  
(phangorn)

A. Fusion of ovaries (binary) (D2c), 24 steps

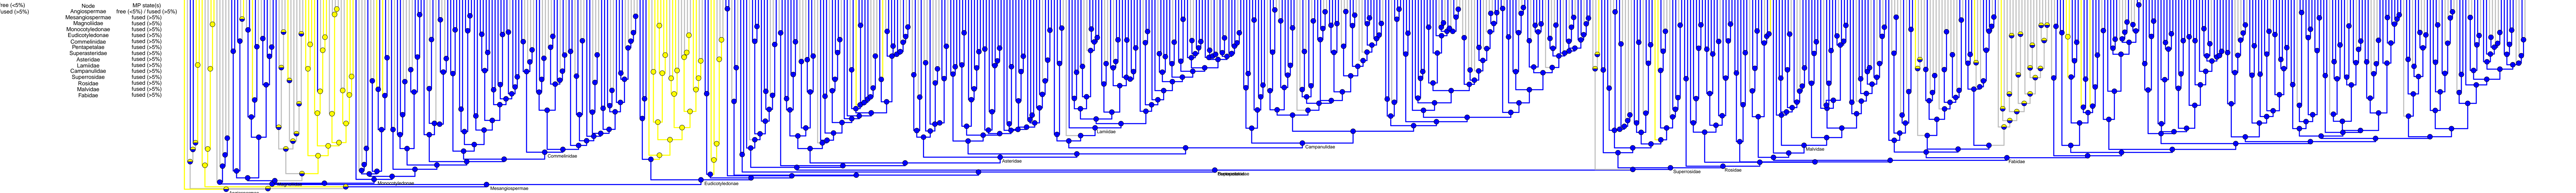

ML ancestral state reconstruction using rayDISC (R:corHMM)  
403\_A. Fusion of ovaries (binary) (D2c), ARD model

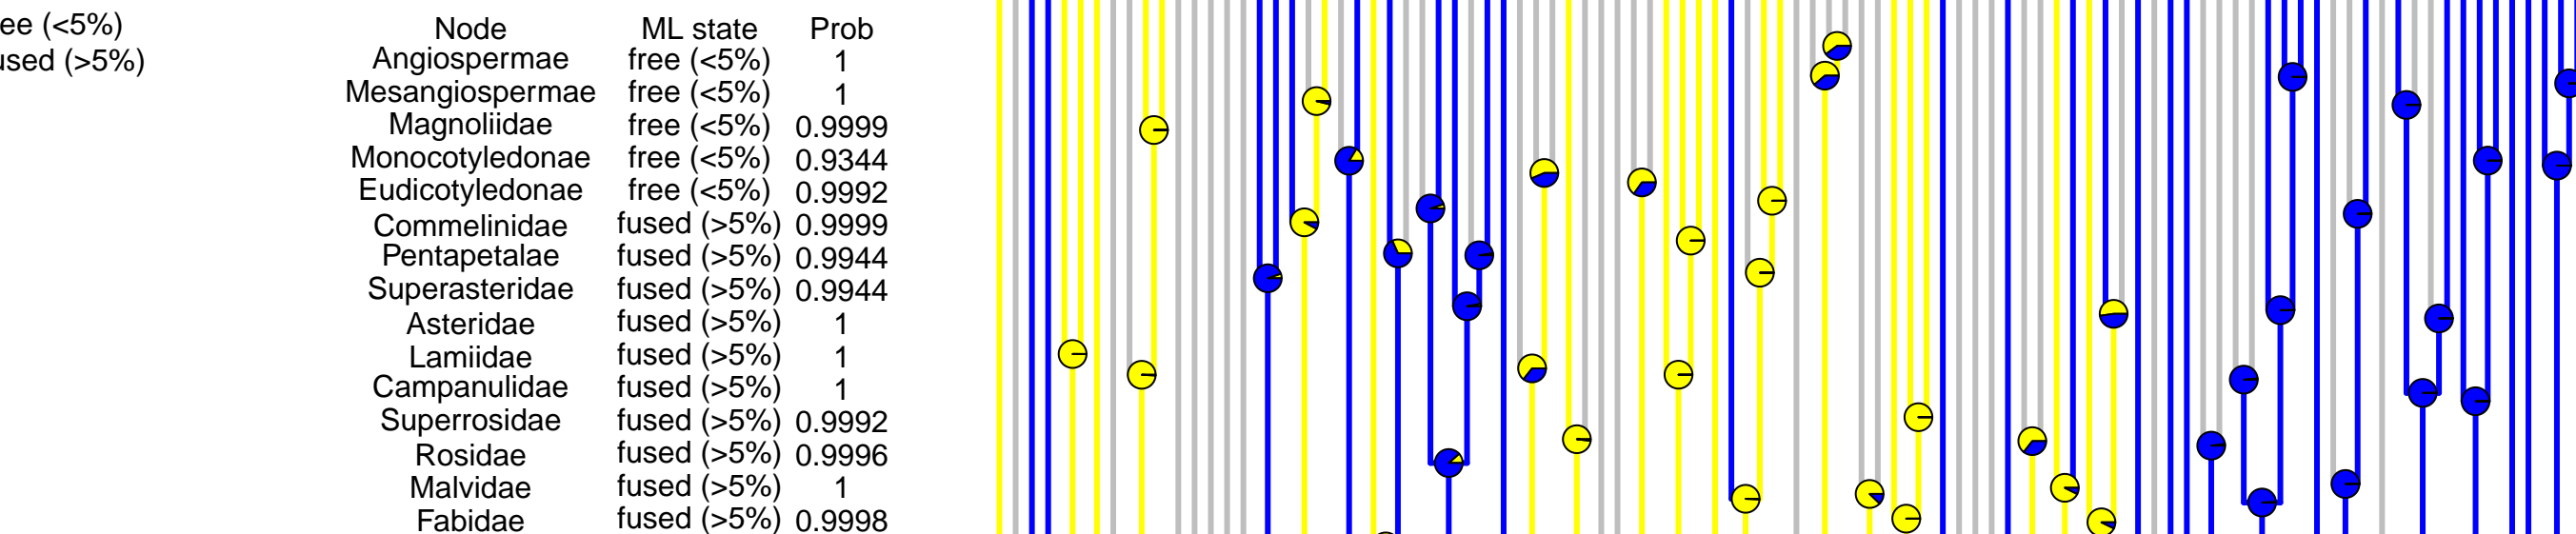

| Model | LogL    | Npar | AIC    | AICc   | DeltaAICc | w    | q01    | q10   |
|-------|---------|------|--------|--------|-----------|------|--------|-------|
| ARD** | -95.19  | 2    | 194.39 | 194.4  | 0         | 0.93 | 0.0053 | 5e-04 |
| ARDex | -102.31 | 2    | 208.62 | 208.64 | 14.24     | 0    | 7e-04  | 8e-04 |
| ER    | -102.81 | 1    | 207.63 | 207.63 | 13.23     | 0    | 8e-04  | 8e-04 |
| UNI01 | -98.85  | 1    | 199.69 | 199.7  | 5.29      | 0.07 | 0.0113 |       |
| UNI10 | -107.27 | 1    | 216.53 | 216.54 | 22.13     | 0    |        | 9e-04 |

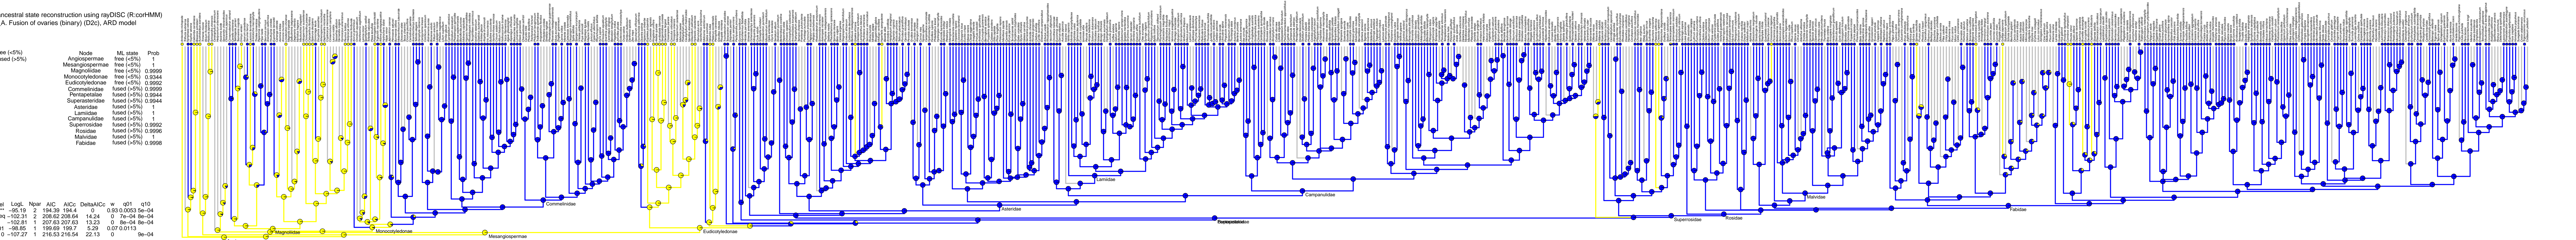

phangorn)

A. Number of ovules per functional carpel (3-state) (D2c), 119 steps

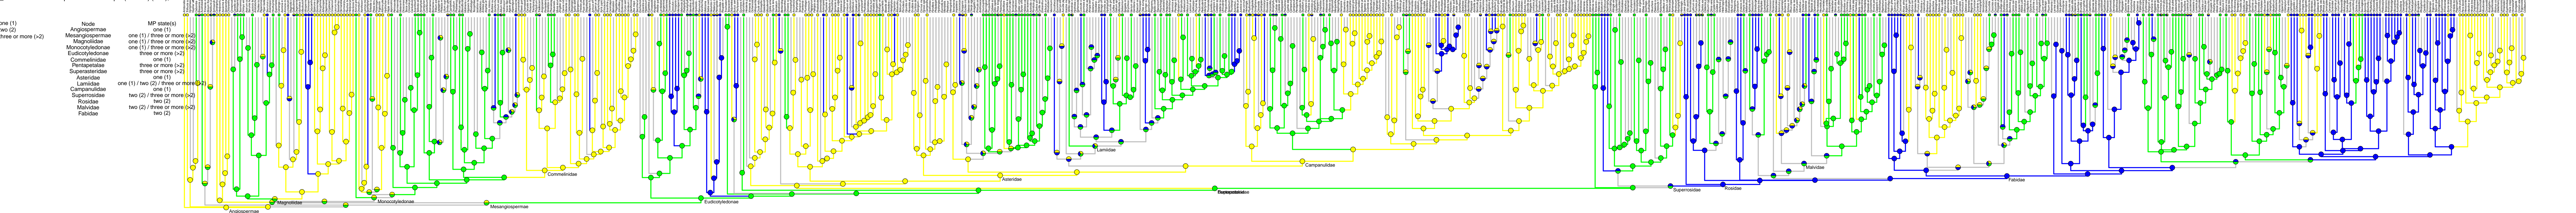

ML ancestral state reconstruction using rayDISC (R:corHMM)

411\_A. Number of ovules per functional carpel (3-state) (D2c), ARDeq model

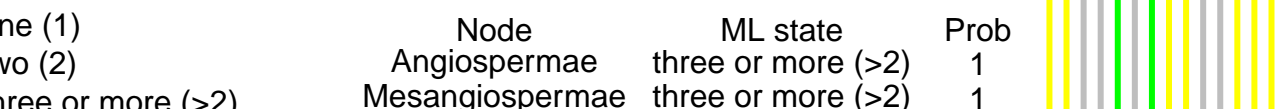

| Model   | LogL    | Npar | AIC    | AICc   | DeltaAICc | w    | q01    | ... |
|---------|---------|------|--------|--------|-----------|------|--------|-----|
| ARD     | -383.3  | 6    | 778.6  | 778.7  | 2.18      | 0.25 | 0.0013 | ... |
| ARDeq** | -382.21 | 6    | 776.41 | 776.52 | 0         | 0.75 | 0.0013 | ... |
| ER      | -398.81 | 1    | 799.62 | 799.63 | 23.11     | 0    | 0.0028 | ... |
| SYM     | -398.31 | 3    | 802.61 | 802.65 | 26.13     | 0    | 0.0023 | ... |
| SYMeq   | -397.45 | 3    | 800.89 | 800.92 | 24.4      | 0    | 0.0024 | ... |
| ORD     | -399.24 | 4    | 806.47 | 806.53 | 30.01     | 0    | 0.0019 | ... |
| ORDeq   | -398.16 | 4    | 804.31 | 804.36 | 27.84     | 0    | 0.0019 | ... |
| ORDSYM  | -412.3  | 2    | 828.6  | 828.61 | 52.09     | 0    | 0.0054 | ... |
| ORDSYMq | -411.4  | 2    | 826.79 | 826.81 | 50.29     | 0    | 0.0054 | ... |
| ORDER   | -413.37 | 1    | 828.74 | 828.74 | 52.22     | 0    | 0.0063 | ... |

| Node            | ML state           | Prob   |
|-----------------|--------------------|--------|
| Angiospermae    | three or more (>2) | 1      |
| Mesangiospermae | three or more (>2) | 1      |
| Magnoliidae     | three or more (>2) | 1      |
| Monocotyledonae | three or more (>2) | 1      |
| Eudicotyledonae | three or more (>2) | 1      |
| Commelinidae    | three or more (>2) | 0.8553 |
| Pentapetalae    | three or more (>2) | 1      |
| Superasteridae  | three or more (>2) | 1      |
| Asteridae       | three or more (>2) | 0.9948 |
| Lamiidae        | three or more (>2) | 1      |
| Campanulidae    | three or more (>2) | 0.9983 |
| Superrosidae    | three or more (>2) | 1      |
| Rosidae         | three or more (>2) | 1      |
| Malvidae        | three or more (>2) | 0.9997 |
| Fabidae         | three or more (>2) | 1      |

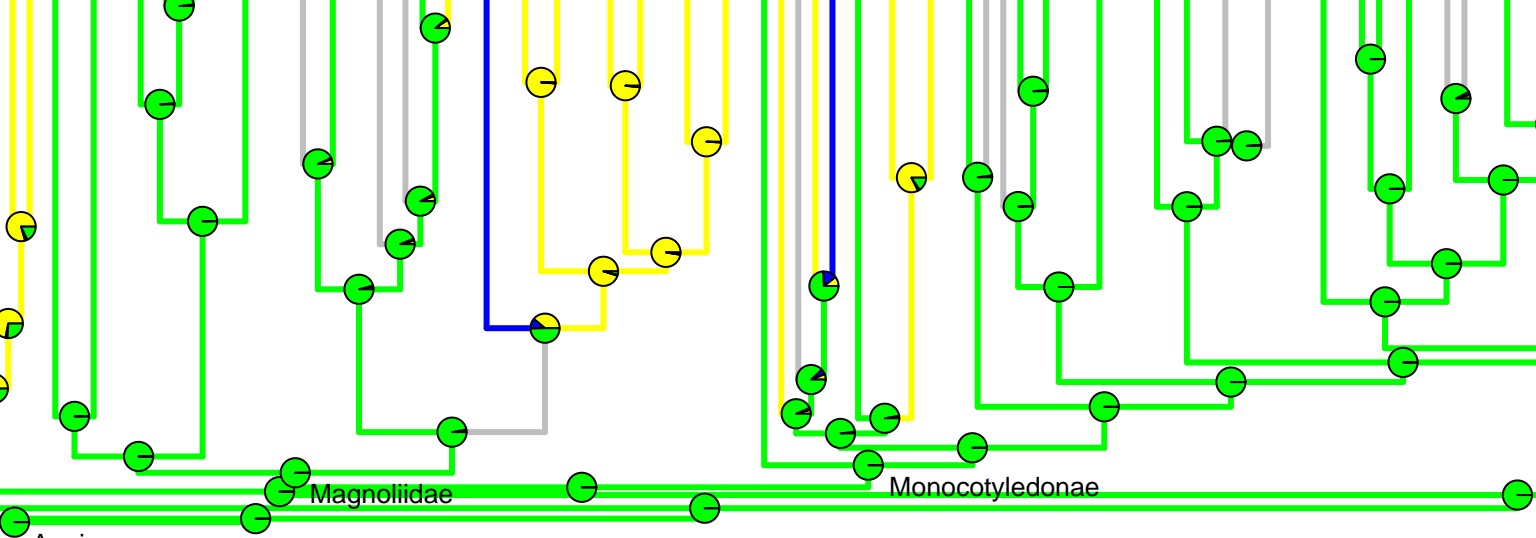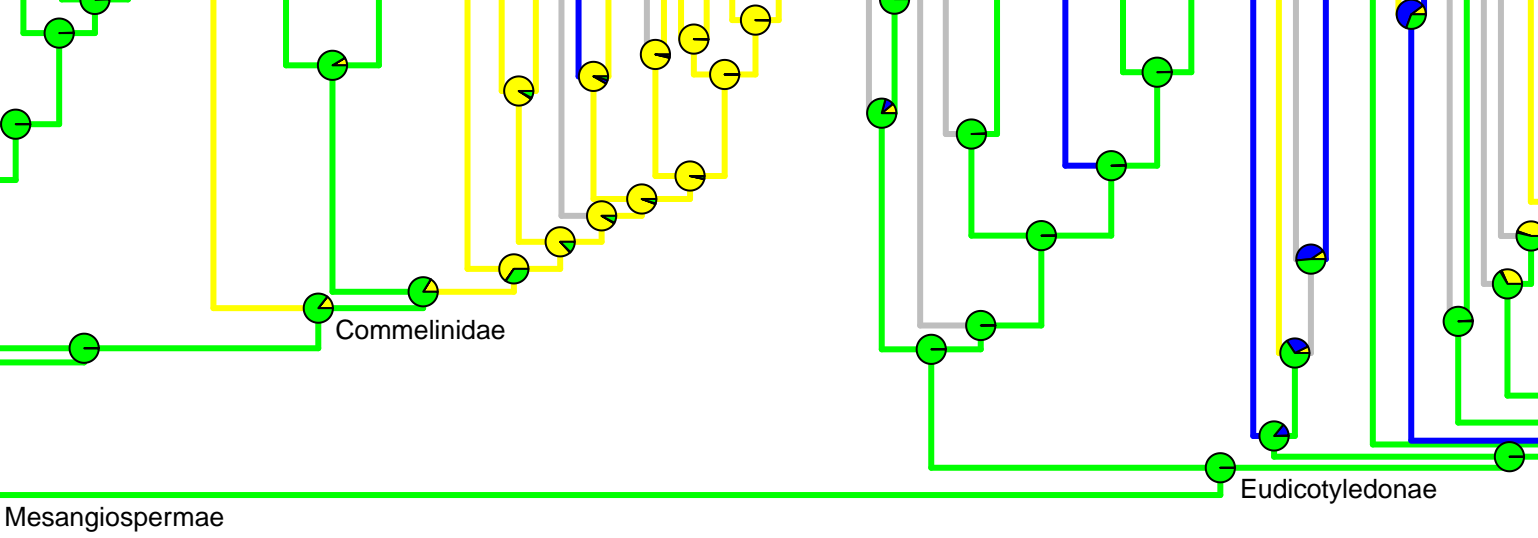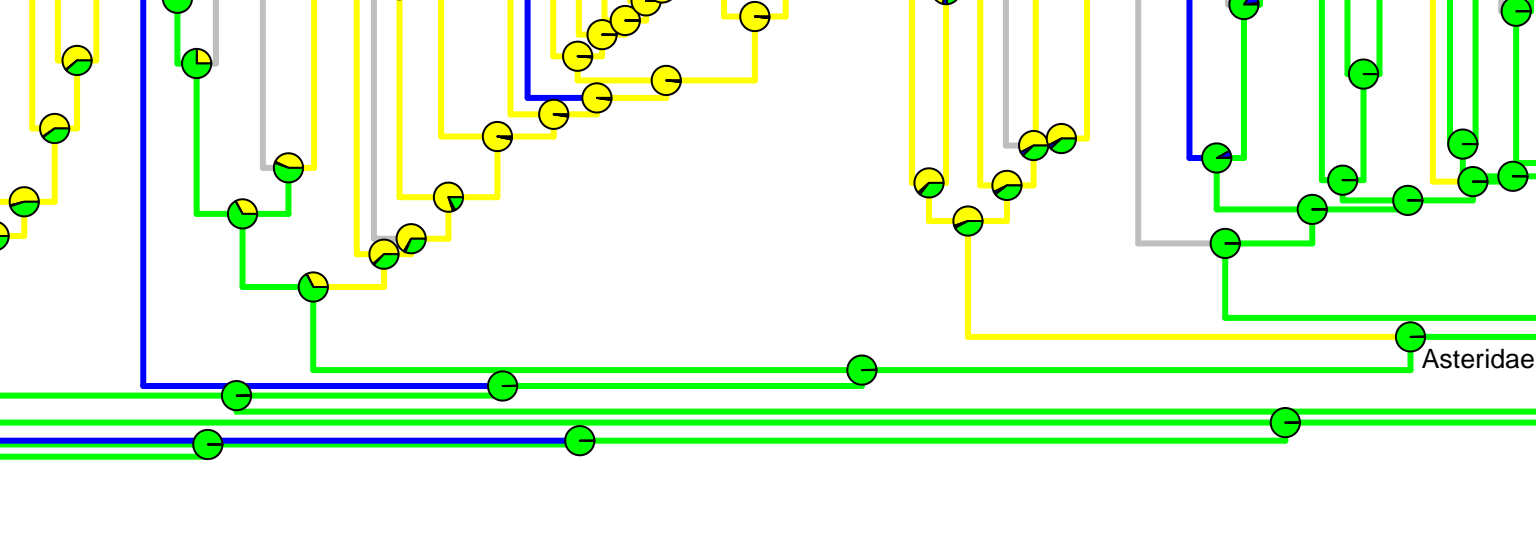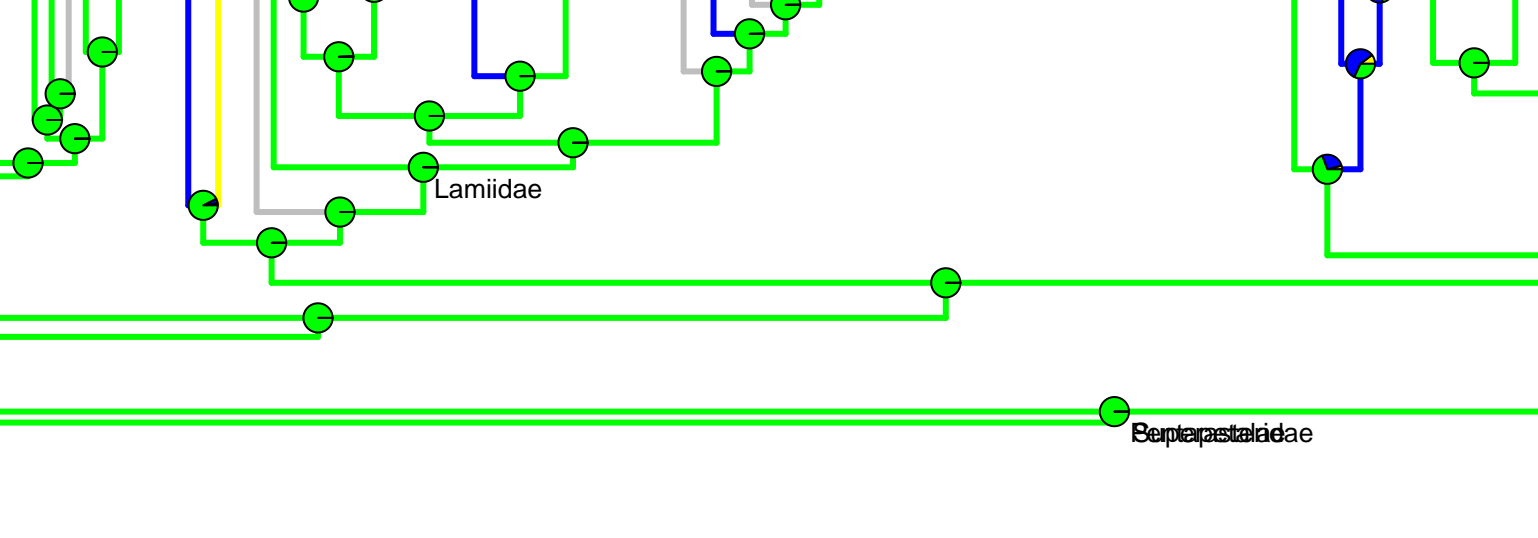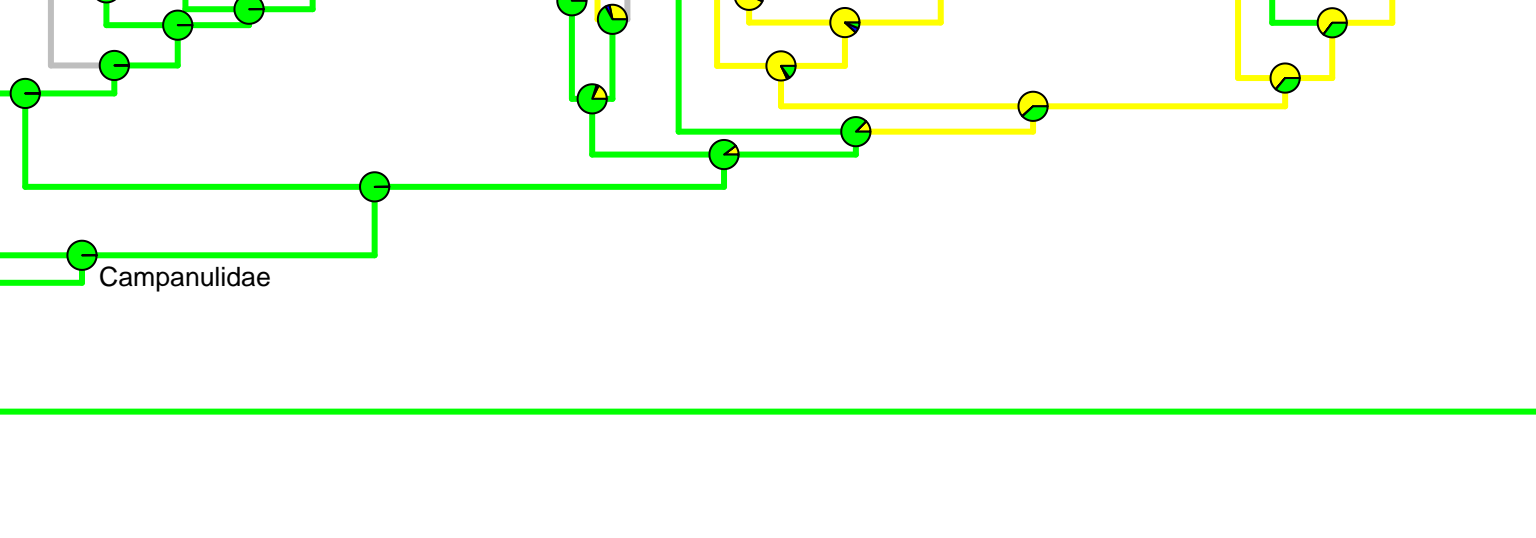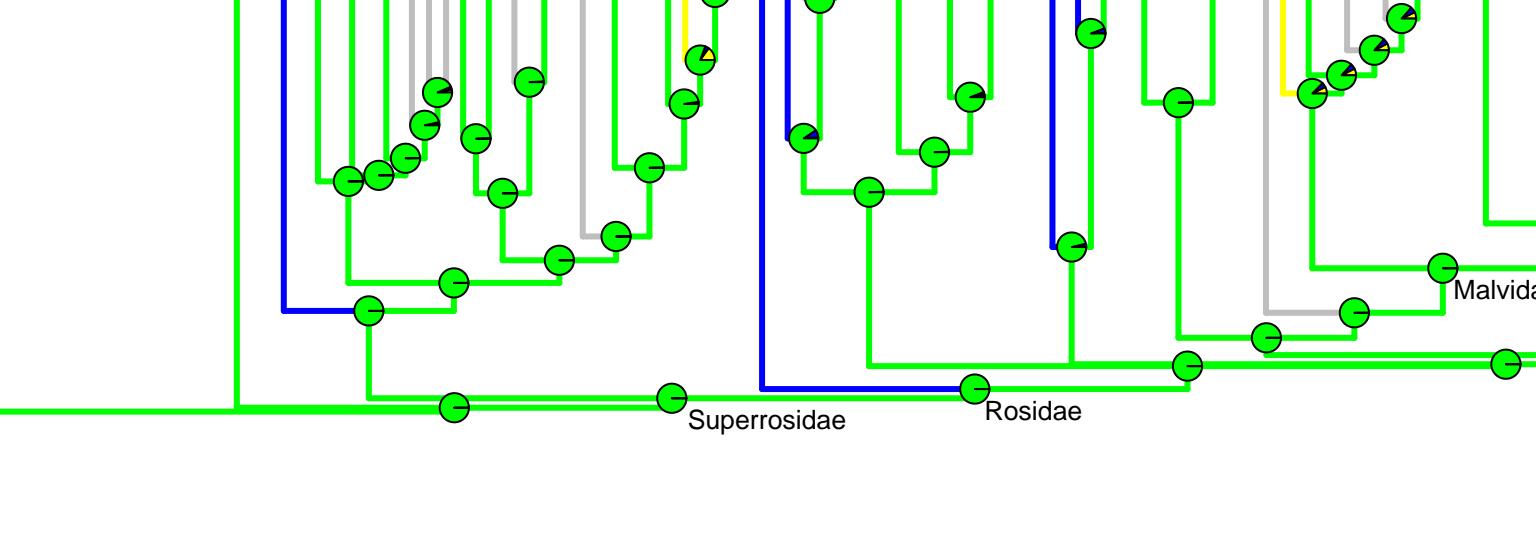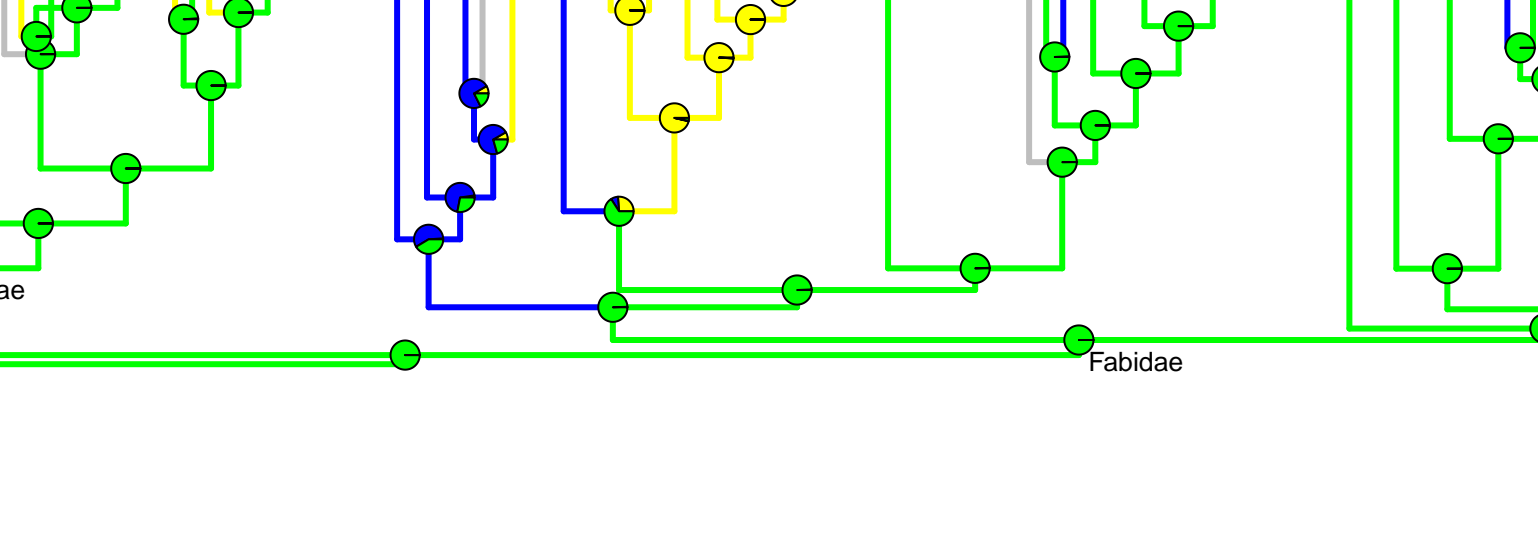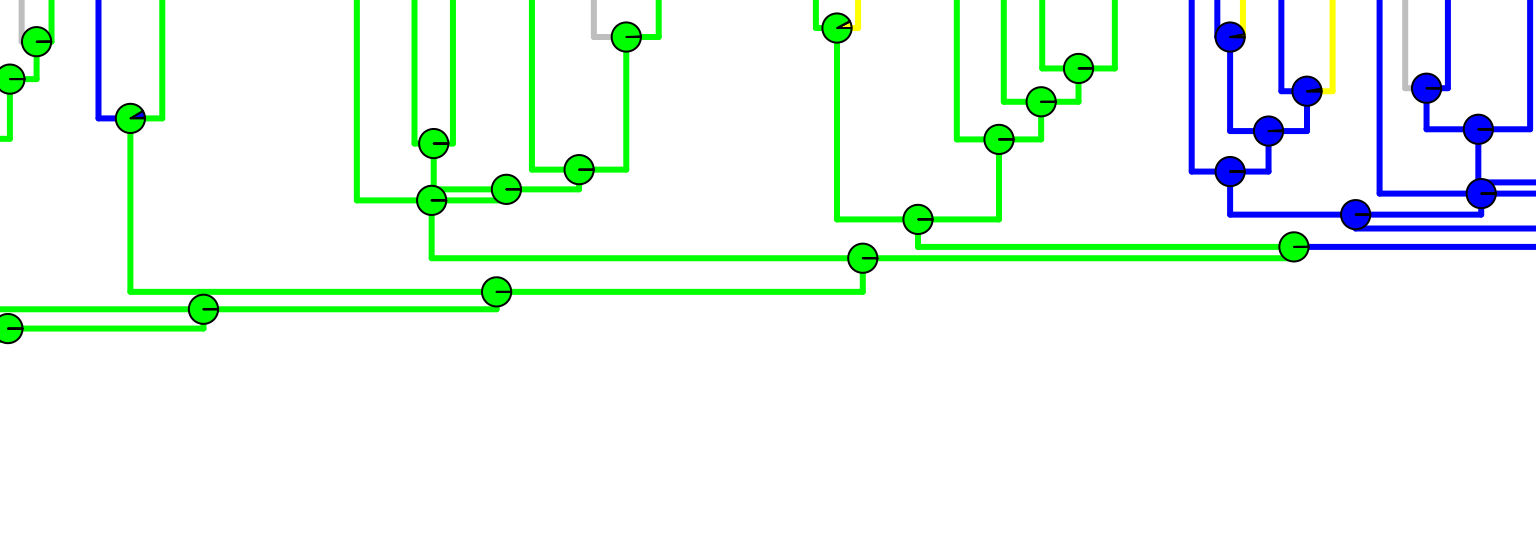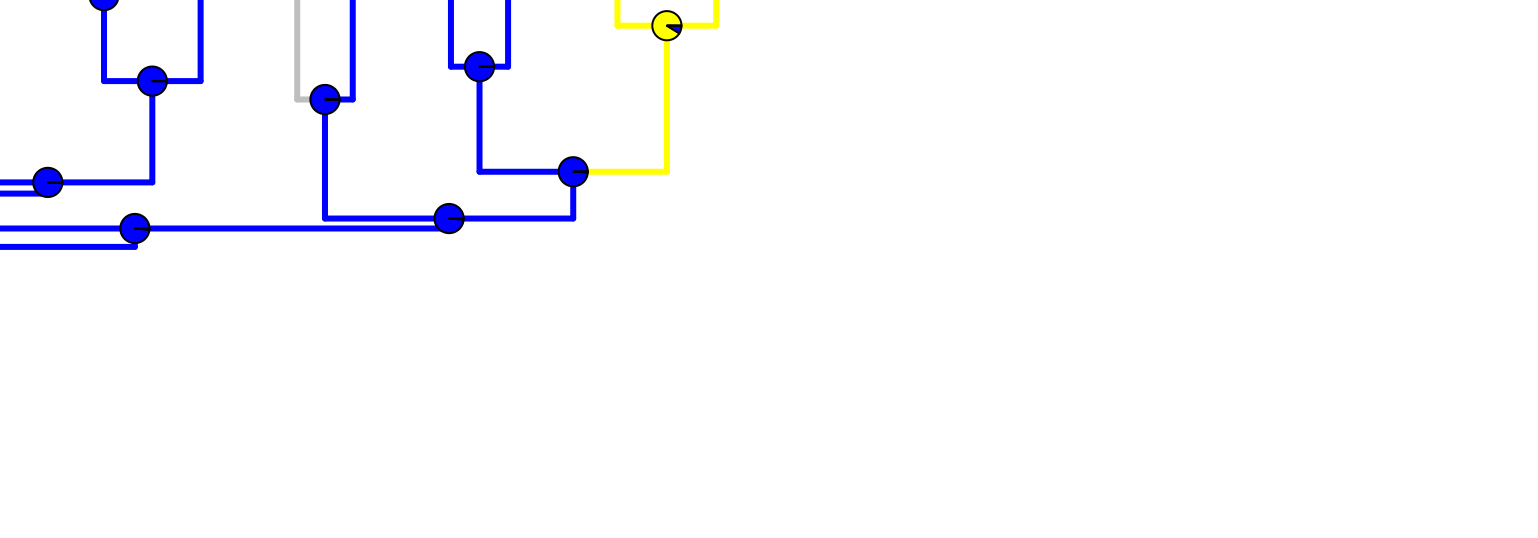

Supplement: Supplementary Data 18 [file ncomms16047-s19.pdf]
