# Supplementary material for: The ancestral flower of angiosperms and its early diversification
Source: Nat Commun. 2017 Aug 1;8:16047. doi: 10.1038/ncomms16047 (PMC5543309; doi:10.1038/ncomms16047)

MP ancestral state reconstruction using ancestral.pars  
(R:phangorn)  
100\_A. Functional sex of flowers (D2d), 98 steps

● bisexual  
● unisexual

| Node            | MP state(s)          |
|-----------------|----------------------|
| Angiospermae    | bisexual / unisexual |
| Mesangiospermae | bisexual             |
| Magnoliidae     | bisexual             |
| Monocotyledonae | bisexual             |
| Eudicotyledonae | bisexual             |
| Commelinidae    | bisexual             |
| Pentapetalae    | bisexual             |
| Superasteridae  | bisexual             |
| Asteridae       | bisexual             |
| Lamiidae        | bisexual             |
| Campanulidae    | bisexual             |
| Superrosidae    | bisexual             |
| Rosidae         | bisexual             |
| Malvidae        | bisexual             |
| Fabidae         | bisexual             |

Commelinidae  
 Monocotyledonae  
 Mesangiospermae

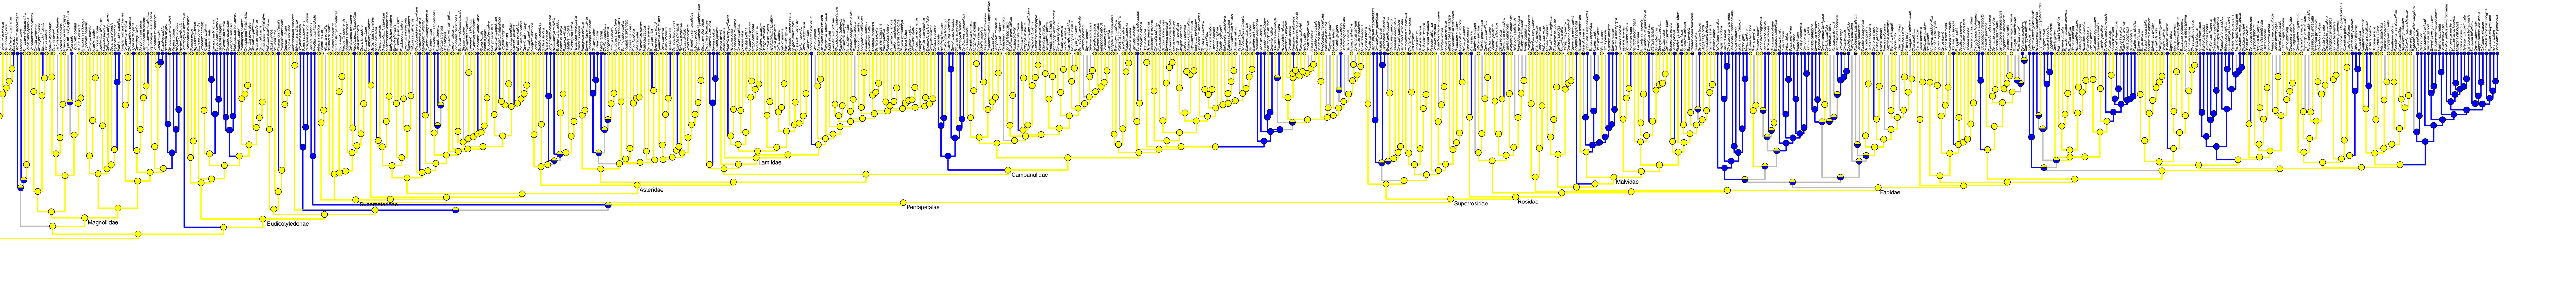

ML ancestral state reconstruction using rayDISC (R:corHMM)  
100\_A. Functional sex of flowers (D2d), ARDeq model

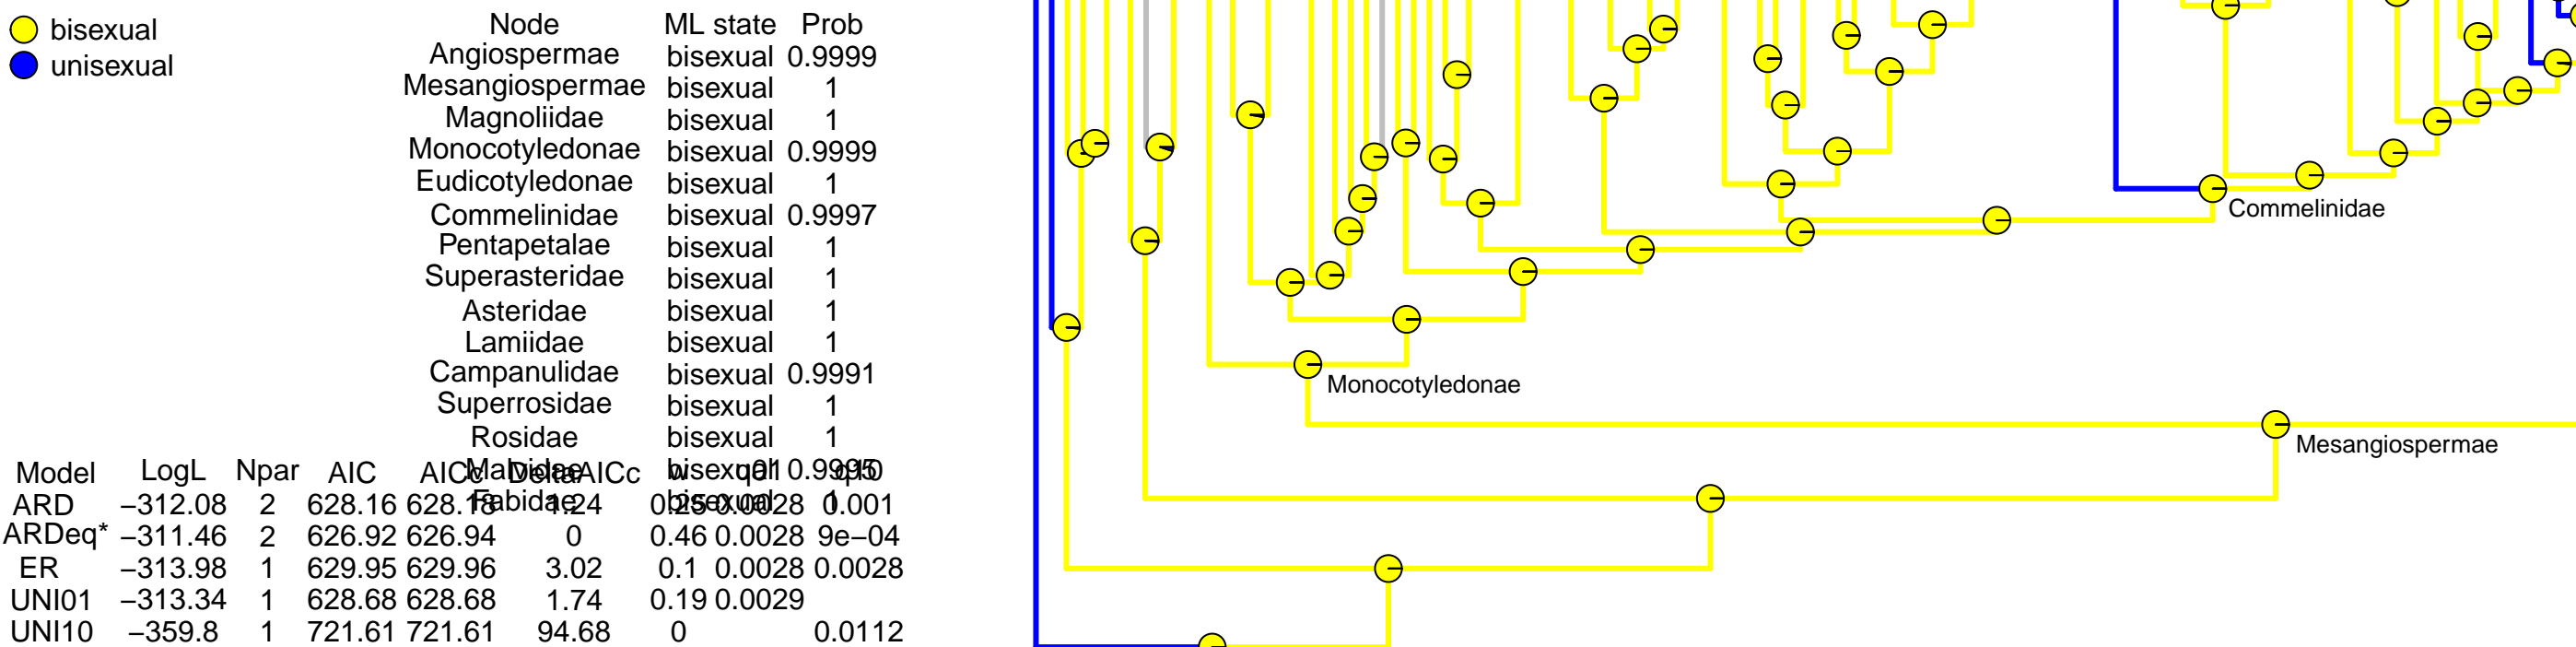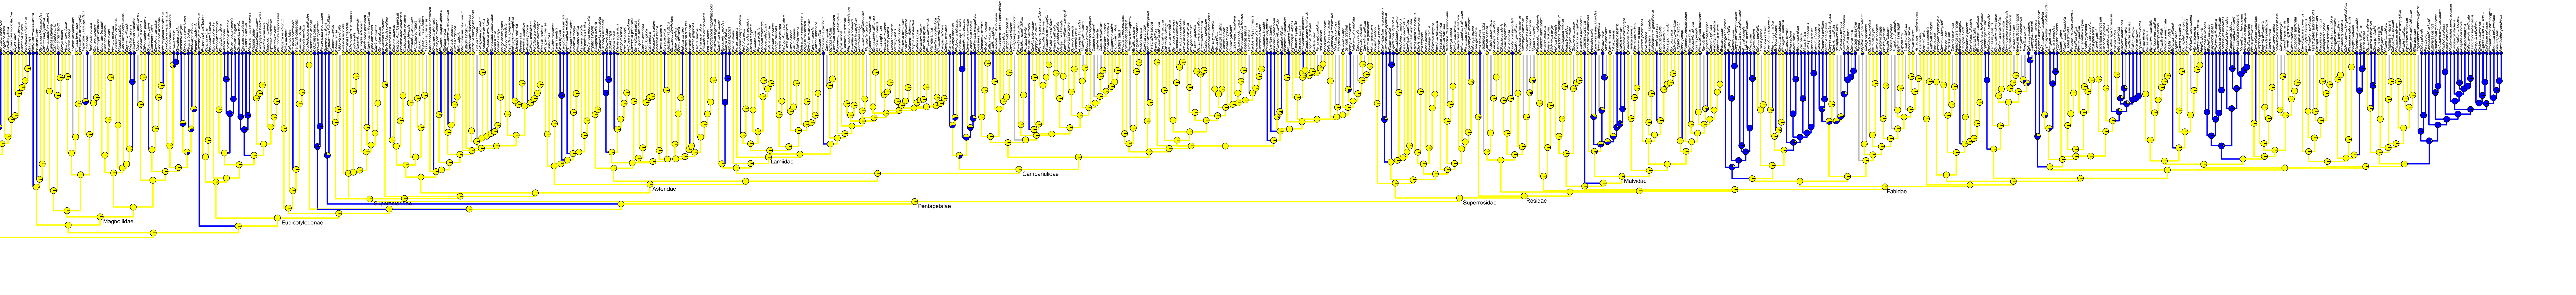



ML ancestral state reconstruction using rayDISC (R:corHMM)  
100\_B. Structural sex of flowers (D2d), ARDeq model

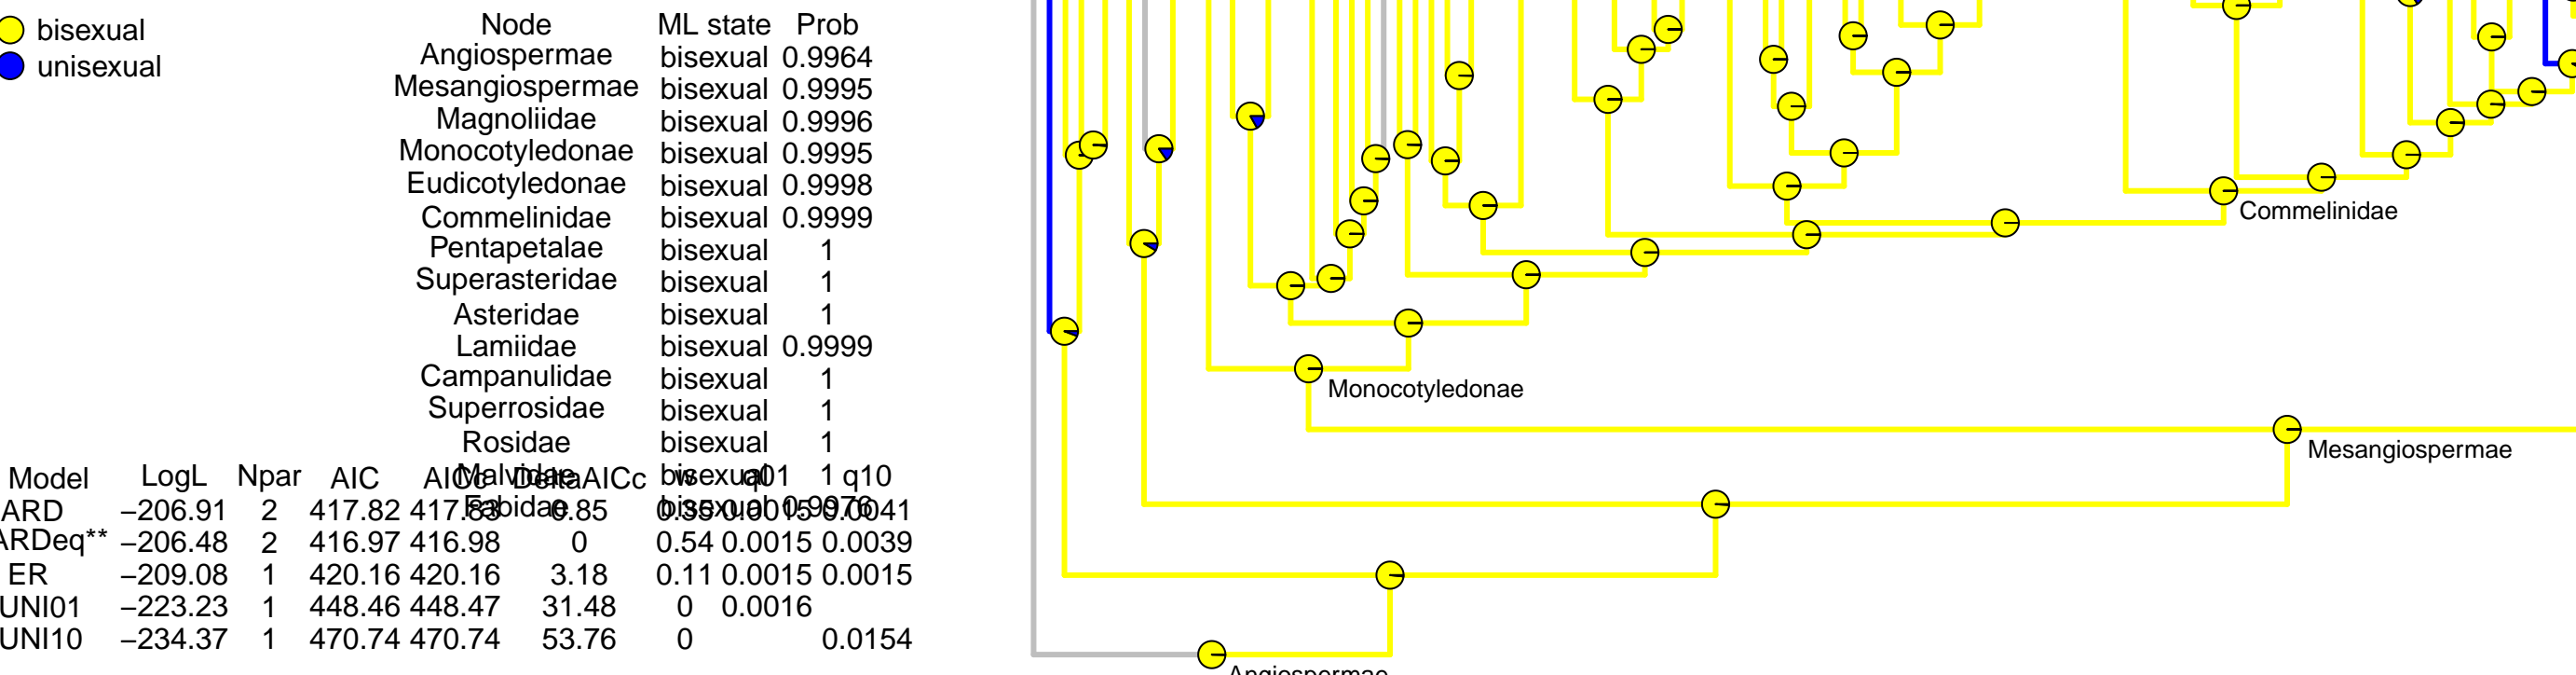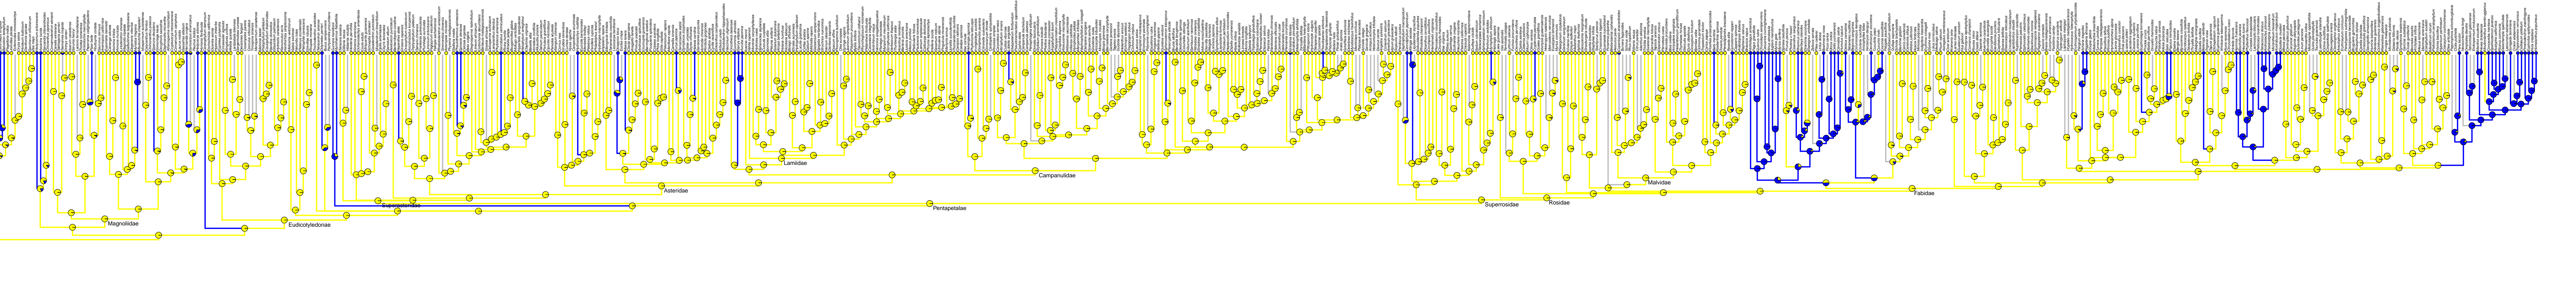

MP ancestral state reconstruction using ancestral.pars  
(R:phangorn)  
102\_B. Ovary position (binary) (D2d), 79 steps

|            | Node            | MP state(s)         |
|------------|-----------------|---------------------|
| ● superior | Angiospermae    | superior            |
| ● inferior | Mesangiospermae | superior            |
|            | Magnoliidae     | superior            |
|            | Monocotyledonae | superior            |
|            | Eudicotyledonae | superior            |
|            | Commelinidae    | superior            |
|            | Pentapetalae    | superior            |
|            | Superasteridae  | superior            |
|            | Asteridae       | superior            |
|            | Lamiidae        | superior            |
|            | Campanulidae    | superior            |
|            | Superrosidae    | superior / inferior |
|            | Rosidae         | superior / inferior |
|            | Malvidae        | superior            |
|            | Fabidae         | superior            |

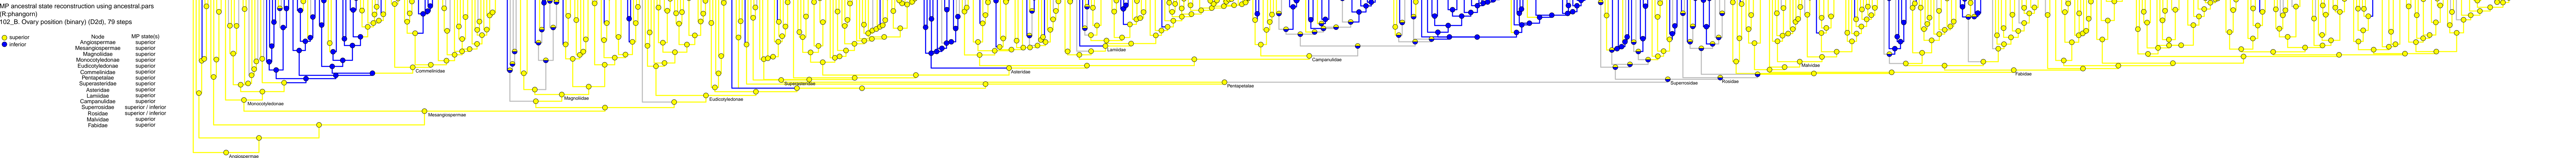

ML ancestral state reconstruction using rayDISC (R:corHMM)  
102\_B. Ovary position (binary) (D2d), ARdeg model

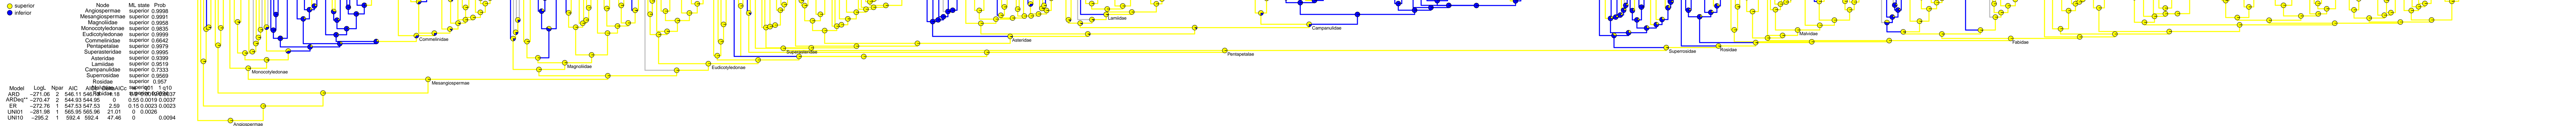



01 A. Perianth presence (D2c). UN10 model

● absent  
● present

| ML state | Prob |
|----------|------|
| present  | 1    |

[illegible]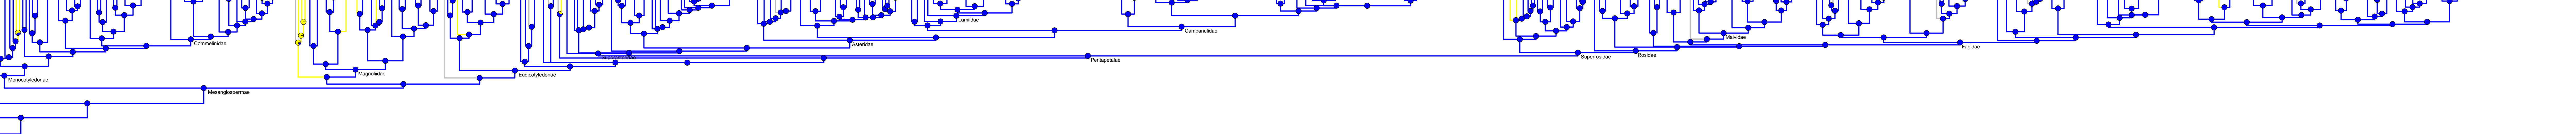



ML ancestral state reconstruction using rayDISC (R:corHMM)  
201\_B. Number of perianth parts (3-state) (D2c), ARDeq model

● one to five (1–5)  
● six to ten (6–10)  
● more than ten (>10)

| Node            | ML state            | Prob   |
|-----------------|---------------------|--------|
| Angiospermae    | more than ten (>10) | 0.9977 |
| Mesangiospermae | more than ten (>10) | 0.9995 |
| Magnoliidae     | more than ten (>10) | 0.6429 |
| Monocotyledonae | six to ten (6–10)   | 0.9896 |
| Eudicotyledonae | more than ten (>10) | 0.9999 |
| Commelinidae    | six to ten (6–10)   | 0.9927 |
| Pentapetalae    | six to ten (6–10)   | 0.9978 |
| Superasteridae  | six to ten (6–10)   | 0.9999 |

| Model | LogL   | Npar | AIC   | AIC <sub>adj</sub> | DeltaAIC | LogL  | Npar    | AIC | DeltaAIC | LogL | Npar | AIC   | DeltaAIC | LogL | Npar    | AIC | DeltaAIC | LogL | Npar | AIC     | DeltaAIC |        |      |     |         |   |        |       |       |         |   |        |      |     |         |   |        |        |      |      |        |     |          |         |   |        |       |       |   |       |     |          |         |   |        |        |       |   |       |     |       |        |   |        |        |       |   |        |     |
|-------|--------|------|-------|--------------------|----------|-------|---------|-----|----------|------|------|-------|----------|------|---------|-----|----------|------|------|---------|----------|--------|------|-----|---------|---|--------|-------|-------|---------|---|--------|------|-----|---------|---|--------|--------|------|------|--------|-----|----------|---------|---|--------|-------|-------|---|-------|-----|----------|---------|---|--------|--------|-------|---|-------|-----|-------|--------|---|--------|--------|-------|---|--------|-----|
| ARD   | -323.1 | 6    | 658.2 | 658.2              | 0.00     | ARD** | -322.03 | 6   | 656.6    | 1.6  | 6    | 658.2 | 0.00     | ER   | -348.35 | 1   | 698.5    | 23.9 | ORD  | -337.02 | 3        | 680.04 | 21.9 | SYM | -336.16 | 3 | 678.32 | 22.19 | SYMeq | -328.91 | 4 | 665.83 | 9.71 | ORD | -328.84 | 4 | 663.67 | 663.72 | 7.56 | 0.02 | 0.0041 | ... | ORDSYMeq | -339.89 | 2 | 683.78 | 683.8 | 27.63 | 0 | 0.002 | ... | ORDSYMeq | -339.14 | 2 | 682.27 | 682.29 | 26.12 | 0 | 0.002 | ... | ORDER | -349.6 | 1 | 701.21 | 701.21 | 45.05 | 0 | 0.0014 | ... |

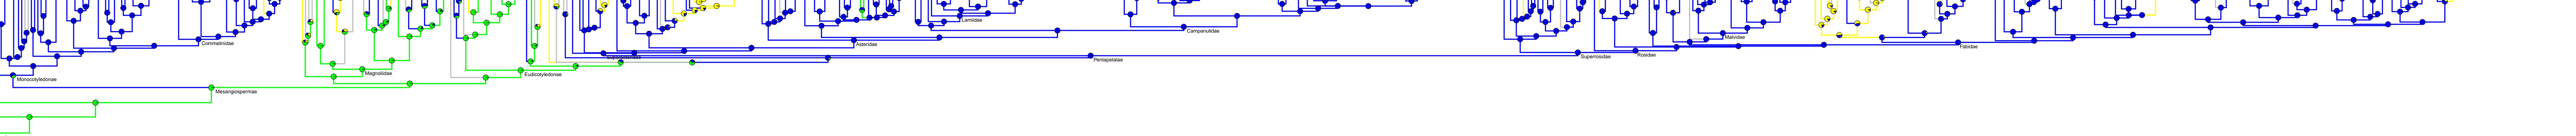





MP ancestral state reconstruction using ancestral.pars  
(R:phangorn)  
230\_A. Perianth phyllotaxy (binary) (D2d), 16 steps

● whorled

● spiral

Node

Angiospermae

Mesangiospermae

Magnoliidae

Monocotyledonae

Eudicotyledonae

Commelinidae

Pentapetalae

Superasteridae

Asteridae

Lamiidae

Campanulidae

Superosidae

Rosidae

Malvidae

Fabidae

MP state(s)

whorled / spiral

whorled

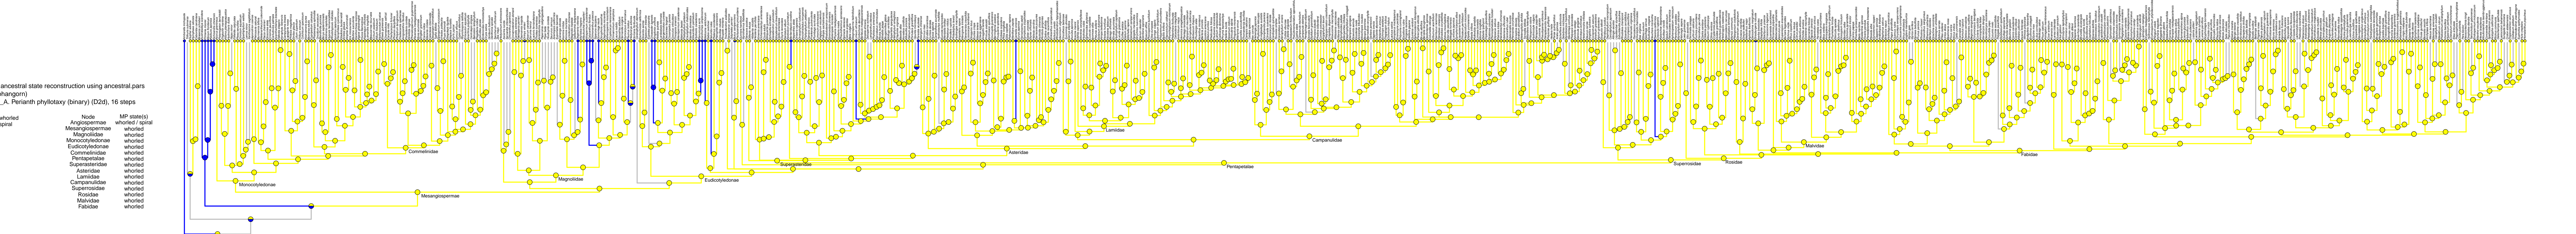

ML ancestral state reconstruction using rayDISC (R:corHMM)  
230\_A. Perianth phyllotaxy (binary) (D2d), ARD model

● whorled

● spiral

Node

ML state

Prob

Angiospermae

spiral

0.9991

Mesangiospermae

spiral

0.9991

Magnoliidae

spiral

0.9975

Monocotyledonae

whorled

0.6024

Eudicotyledonae

spiral

0.9985

Commelinidae

whorled

0.9999

Pentapetalae

whorled

0.9794

Superasteridae

whorled

0.9845

Asteridae

whorled

0.9997

Lamiidae

whorled

1

Campanulidae

whorled

1

Superrosidae

whorled

0.9945

Rosidae

whorled

0.9966

Model

LogL

Npar

AIC

AICc

ΔAICc

ΔAICc

ΔAICc

q10

ARD\*\*\*

-75.87

2

143.75

143.76

0.01

0.0093

0

ARDeq

-75.71

2

155.42

155.43

11.67

4e-04

0

ER

-76.18

1

154.37

154.37

10.61

4e-04

4e-04

UNI01

-76.4

1

154.8

154.81

11.04

4e-04

0

UNI10

-78.94

1

159.89

159.89

16.13

0

0.0161

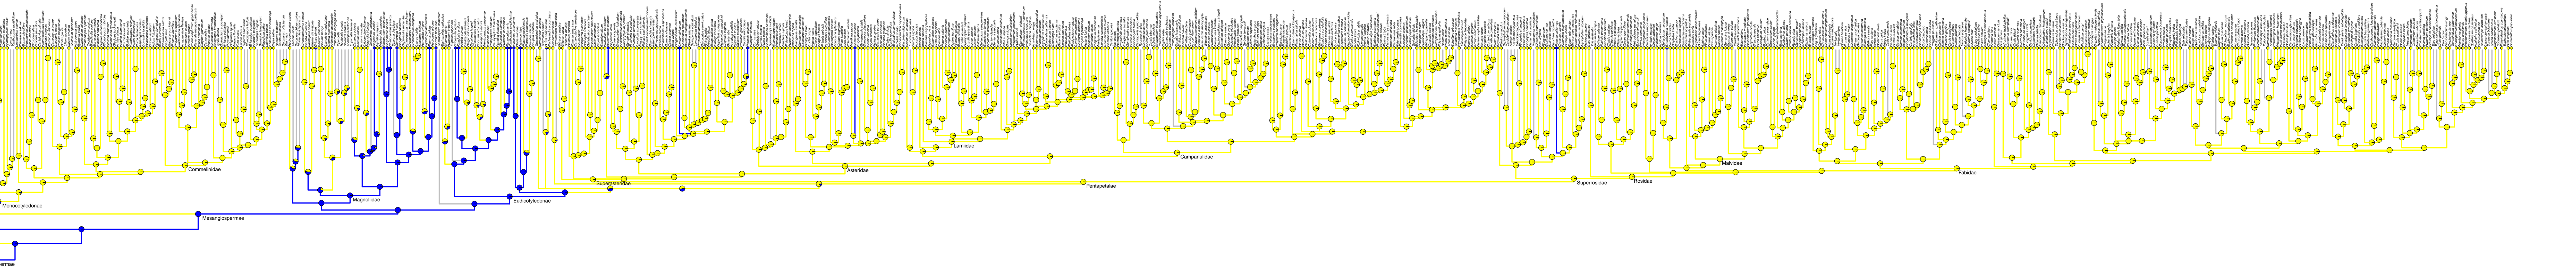

MP ancestral state reconstruction using ancestral.pars  
(R:phangorn)  
231\_A. Number of perianth whorls (D2c), 73 steps

● one (1)  
● two (2)  
● more than two (>2)

|                 |                    |
|-----------------|--------------------|
| Node            | MP state(s)        |
| Angiospermae    | more than two (>2) |
| Mesangiospermae | more than two (>2) |
| Magnoliidae     | more than two (>2) |
| Monocotyledonae | two (2)            |
| Eudicotyledonae | more than two (>2) |
| Commelinidae    | two (2)            |
| Pentapetalae    | two (2)            |
| Superasteridae  | two (2)            |
| Asteridae       | two (2)            |
| Lamiidae        | two (2)            |
| Campanulidae    | two (2)            |
| Superrosidae    | two (2)            |
| Rosidae         | two (2)            |
| Malvidae        | two (2)            |
| Fabidae         | two (2)            |

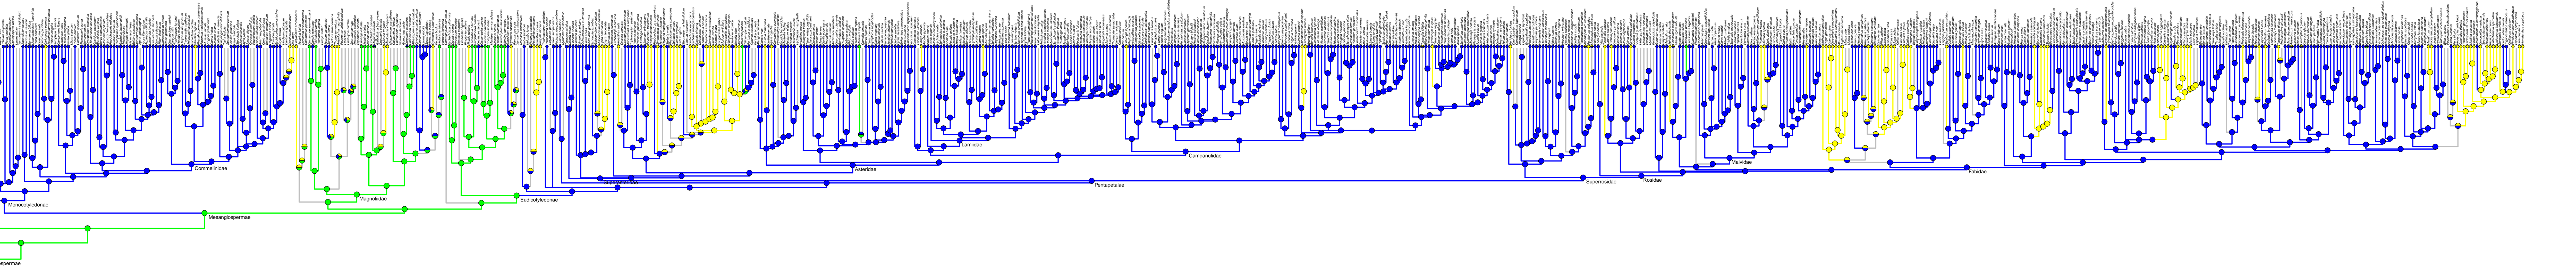

ML ancestral state reconstruction using rayDISC (R:corHMM)  
231\_A. Number of perianth whorls (D2c), ARdeq model

● one (1)  
● two (2)  
● more than two (>2)

| Node            | ML state           | Prob   |
|-----------------|--------------------|--------|
| Angiospermae    | more than two (>2) | 1      |
| Mesangiospermae | more than two (>2) | 0.999  |
| Magnoliidae     | more than two (>2) | 1      |
| Monocotyledonae | two (2)            | 0.732  |
| Eudicotyledonae | more than two (>2) | 0.9929 |
| Commelinidae    | two (2)            | 0.9999 |
| Pentapetalae    | two (2)            | 0.9996 |
| Superasteridae  | two (2)            | 0.9995 |

| Model   | LogL    | Npar | AIC    | DeltaAIC | w     | 2dlnl | ...        |
|---------|---------|------|--------|----------|-------|-------|------------|
| ARD     | -267.02 | 6    | 546.03 | 546.03   | 2.18  | 0.27  | 0.017 ...  |
| ARD**   | -265.93 | 6    | 543.65 | 543.65   | 0     | 0.74  | 0.017 ...  |
| ER      | -309.43 | 1    | 620.99 | 620.99   | 66.9  | 0     | 0.01 ...   |
| SYM     | -291.2  | 3    | 588.41 | 588.41   | 44.48 | 0     | 0.019 ...  |
| SYM*    | -290.83 | 3    | 587.66 | 587.66   | 43.73 | 0     | 0.019 ...  |
| ORD     | -274.16 | 4    | 556.32 | 556.32   | 12.41 | 0     | 0.045 ...  |
| ARdeq   | -273.06 | 4    | 554.13 | 554.18   | 10.22 | 0     | 0.0045 ... |
| ORDSYM  | -297.48 | 2    | 598.96 | 598.98   | 55.02 | 0     | 0.0018 ... |
| ORDSYM* | -297.71 | 2    | 597.43 | 597.44   | 53.48 | 0     | 0.0018 ... |
| ORDER   | -312.45 | 1    | 626.89 | 626.9    | 82.94 | 0     | 0.0011 ... |

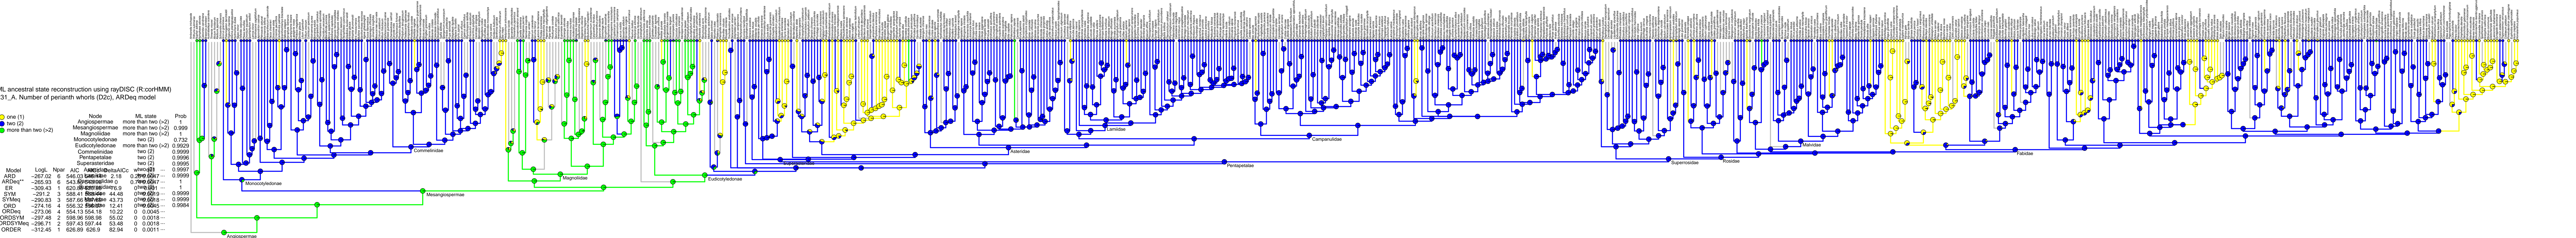

MP ancestral state reconstruction using ancestral.pars  
(R:phangorn)  
232\_A. Perianth merism (4-state) (D2c), 84 steps

- dimerous
- trimerous
- tetramerous
- pentamerous

|            |                      |
|------------|----------------------|
| de         | MP state(s)          |
| permae     | trimerous            |
| pspermae   | trimerous            |
| oliidae    | trimerous            |
| yledonae   | trimerous            |
| ledonae    | dimerous / trimerous |
| elininidae | trimerous            |
| etalaee    | pentamerous          |
| steridae   | pentamerous          |
| ridae      | pentamerous          |
| iidae      | pentamerous          |
| nulidae    | pentamerous          |
| osidae     | pentamerous          |
| idae       | pentamerous          |
| idae       | pentamerous          |
| idae       | pentamerous          |

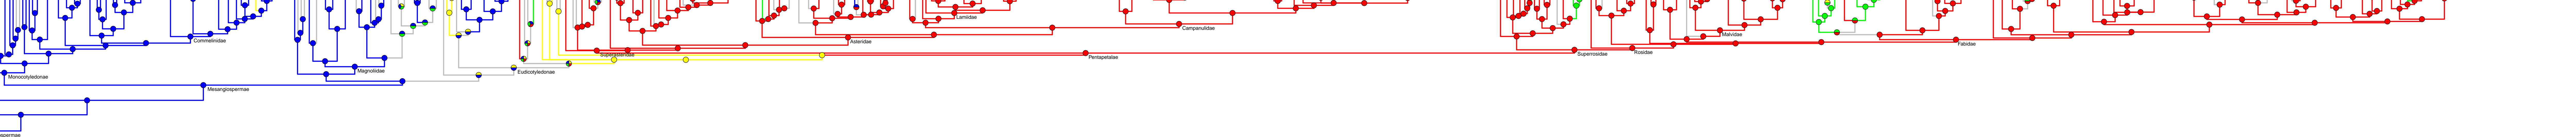

ML ancestral state reconstruction using rayDISC (R:corHMM)  
232\_A. Perianth merism (4-state) (D2c), SYMeq model

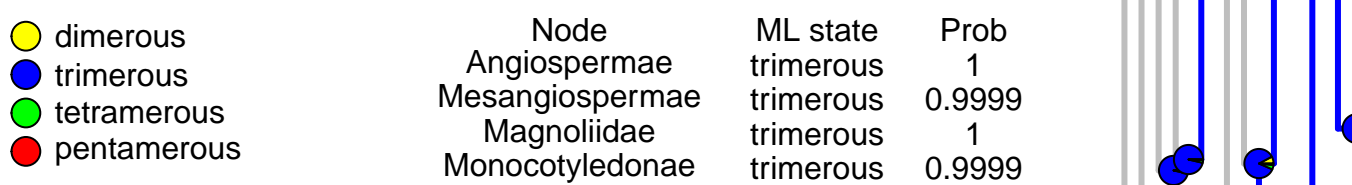

| Node            | ML state    | Prob   |
|-----------------|-------------|--------|
| Angiospermae    | trimerous   | 1      |
| Mesangiospermae | trimerous   | 0.9999 |
| Magnoliidae     | trimerous   | 1      |
| Monocotyledonae | trimerous   | 0.9999 |
| Eudicotyledonae | trimerous   | 0.8465 |
| Commelinidae    | trimerous   | 1      |
| Pentapetalae    | pentamerous | 0.9988 |
| Superasteridae  | pentamerous | 0.9999 |

| Model    | LogL    | Npar | AIC    | AICc   | DeltaAIC | DeltaAICc | Posterior |
|----------|---------|------|--------|--------|----------|-----------|-----------|
| ARD      | -320.6  | 12   | 665.2  | 665.2  | 4.89     | 4.89      | 0.9999    |
| ARDeq    | -319.49 | 12   | 662.68 | 662.68 | 2.67     | 2.67      | 0.9999    |
| ER       | -360.2  | 1    | 722.99 | 722.99 | 1.6      | 1.6       | 0.9999    |
| SYM      | -325.58 | 6    | 663.16 | 663.16 | 2.56     | 2.56      | 0.9999    |
| SYMeq**  | -324.3  | 6    | 660.6  | 660.6  | 0        | 0         | 0.9999    |
| ORD      | -336.09 | 6    | 684.18 | 684.18 | 23.58    | 23.58     | ...       |
| ORDeq    | -335.22 | 6    | 682.44 | 682.55 | 21.84    | 0         | 0         |
| ORDSYM   | -344.53 | 3    | 695.05 | 695.08 | 34.38    | 0         | 0.0019    |
| ORDSYMeq | -343.36 | 3    | 692.73 | 692.76 | 32.05    | 0         | 0.0019    |
| ORDER    | -346.22 | 1    | 694.45 | 694.45 | 33.75    | 0         | 0.0024    |

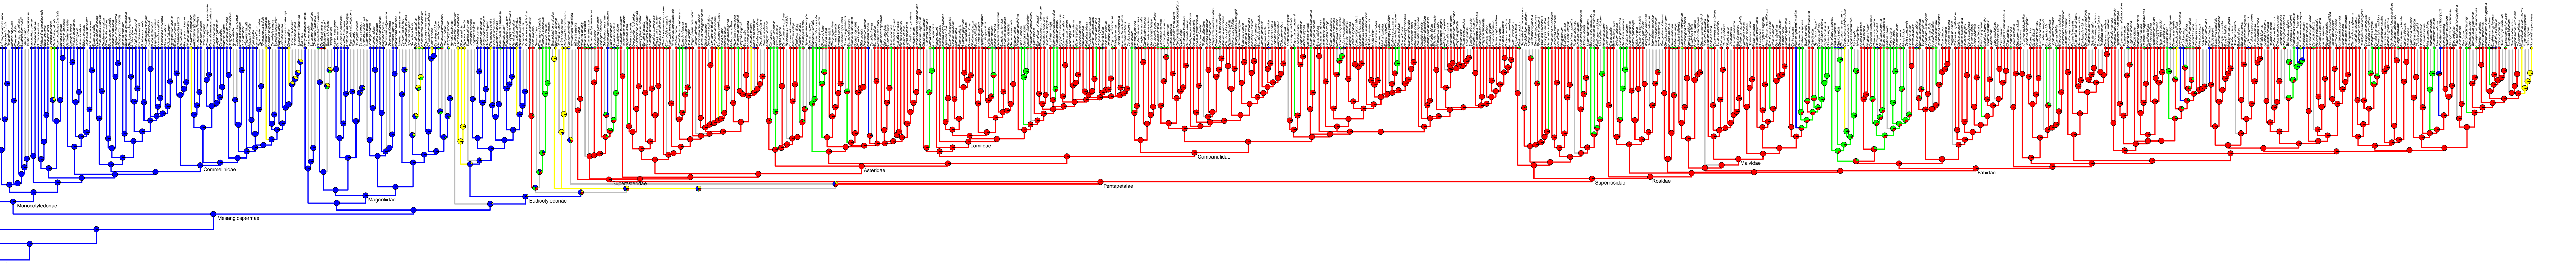

MP ancestral state reconstruction using ancestral.pars  
R:phangorn)  
32\_B. Perianth merism (3-state) (D2c), 70 steps

Node MP state(s)

trimerous

tetramerous

pentamerous

Angiospermae trimerous

Mesangiospermae trimerous

Magnoliidae trimerous

Monocotyledonae trimerous

Eudicotyledonae trimerous

Commelinidae trimerous

Pentapetalae pentamerous

Superasteridae pentamerous

Asteridae pentamerous

Lamiidae pentamerous

Campanulidae pentamerous

Superrosidae pentamerous

Rosidae pentamerous

Malvidae pentamerous

Fabidae pentamerous

Commelinidae

Monocotyledonae

Mesangiospermae

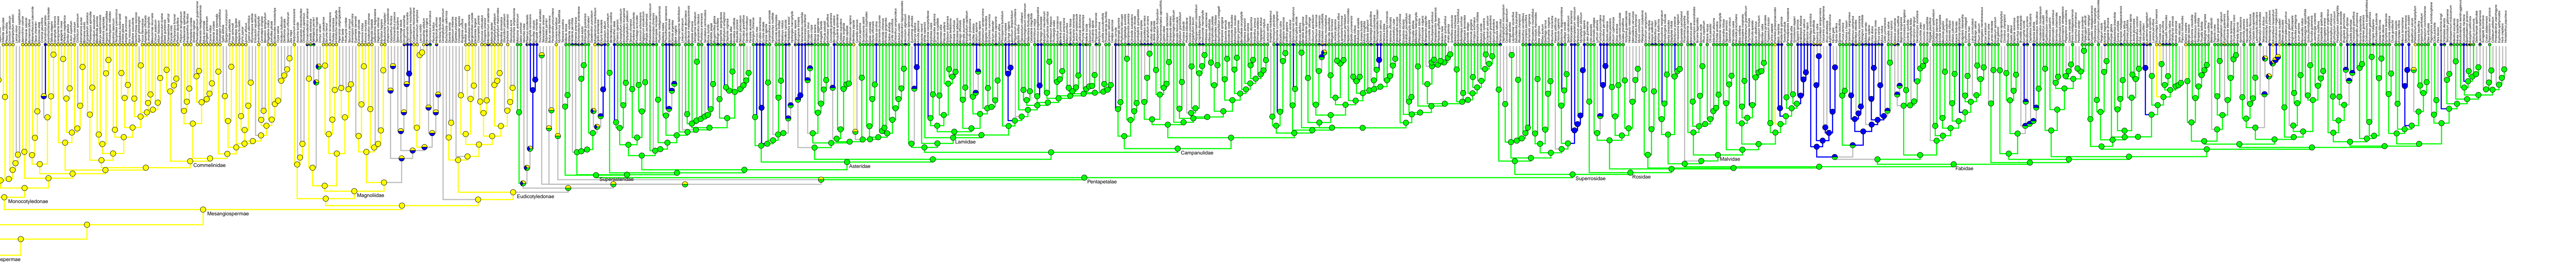

ML ancestral state reconstruction using rayDISC (R:corHMM)  
232\_B. Perianth merism (3-state) (D2c), ORDeq model

● trimerous  
● tetramerous  
● pentamerous

| Node            | ML state    | Prob   |
|-----------------|-------------|--------|
| Angiospermae    | trimerous   | 0.998  |
| Mesangiospermae | trimerous   | 0.9976 |
| Magnoliidae     | trimerous   | 0.9977 |
| Monocotyledonae | trimerous   | 0.9996 |
| Eudicotyledonae | trimerous   | 0.7392 |
| Commelinidae    | trimerous   | 1      |
| Pentapetalae    | pentamerous | 0.9809 |
| Superasteridae  | pentamerous | 0.991  |

| Model   | LogL    | Npar | AIC    | AICc   | DeltaAIC | Penalty         | ML state | Prob |
|---------|---------|------|--------|--------|----------|-----------------|----------|------|
| ARD     | -254.32 | 6    | 520.65 | 520.65 | 5.44     | pentamerous     | 0.9998   |      |
| ARDeq   | -253.42 | 6    | 518.63 | 518.63 | 6.62     | pentamerous     | 0.9999   |      |
| ER      | -280.25 | 1    | 562.33 | 562.33 | 7.10     | pentamerous     | 0.9981   |      |
| SYM     | -255.81 | 3    | 517.62 | 517.62 | 2.33     | pentamerous     | 0.9994   |      |
| SYMq    | -254.77 | 3    | 515.55 | 515.55 | 0.26     | pentamerous     | 0.9996   |      |
| ORD     | -254.52 | 4    | 517.05 | 517.05 | 1.78     | pentamerous     | 0.9997   |      |
| ORDSY*  | -253.63 | 4    | 515.27 | 515.32 | 0        | 0.31 9e-04 ...  |          |      |
| ORDSYM  | -257.91 | 2    | 519.82 | 519.83 | 4.51     | 0.03 0.0014 ... |          |      |
| ORDSYMq | -256.9  | 2    | 517.8  | 517.82 | 2.5      | 0.09 0.0014 ... |          |      |
| ORDER   | -260.43 | 1    | 522.85 | 522.86 | 7.54     | 0.01 0.0023 ... |          |      |

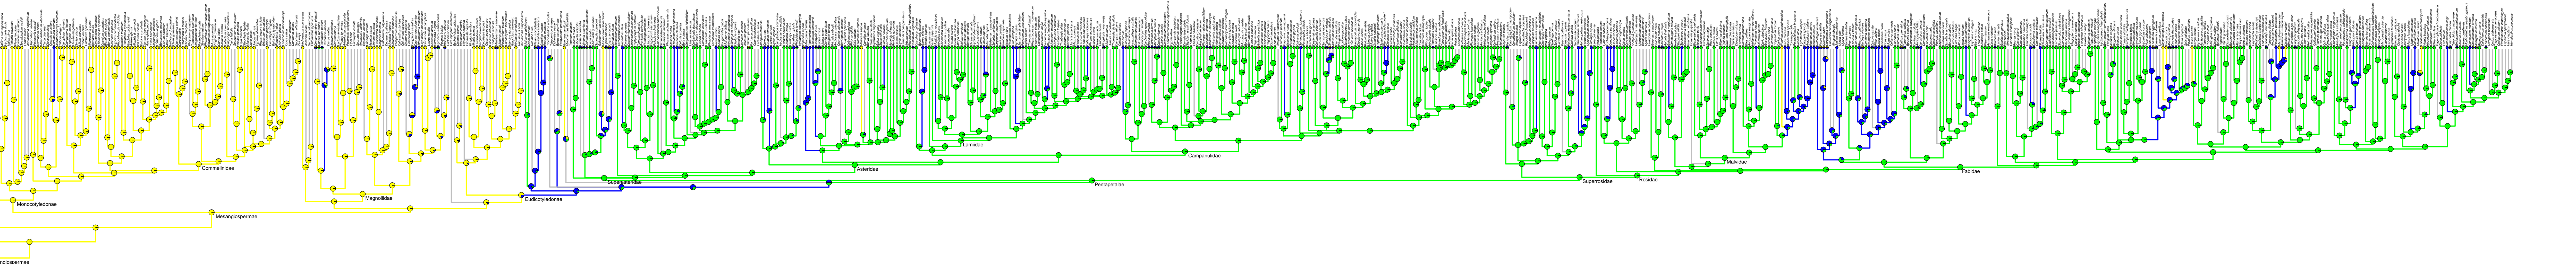

MP ancestral state reconstruction using ancestral.pars  
(R:phangorn)  
234\_A. Perianth differentiation (binary) (D2d), 64 steps

- undifferentiated

● differentiated

Node

Angiospermae

Mesangiospermae

Magnoliidae

Monocotyledonae

Eudicotyledonae

Commelinidae

Pentapetalidae

Superasteridae

Asteridae

Lamiidae

Campanulidae

Superrosidae

Rosidae

Malvidae

Fabidae
- MP state(s)

undifferentiated

undifferentiated

undifferentiated / differentiated

undifferentiated

undifferentiated / differentiated

undifferentiated

differentiated

differentiated

differentiated

differentiated

differentiated

differentiated

differentiated

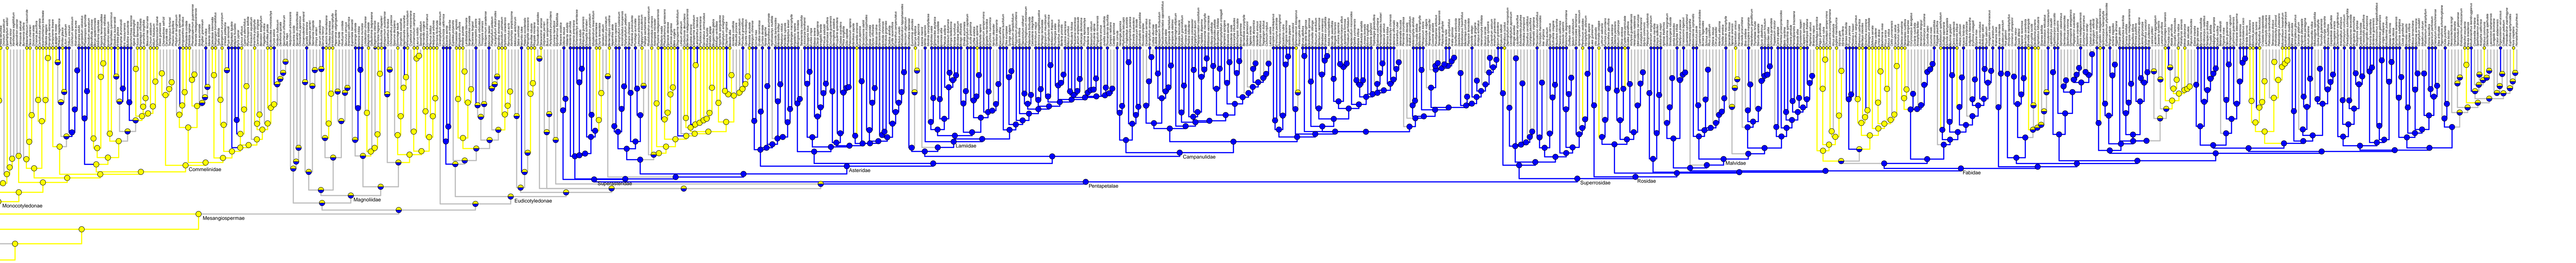



MP ancestral state reconstruction using ancestral.pars  
(R:phangorn)  
204\_A. Fusion of perianth (D2c), 77 steps

- free (<5%)

● fused (>5%)

Node

Angiospermae

Mesangiospermae

Magnoliidae

Monocotyledonae

Eudicotyledonae

Commelinidae

Pentapetalae

Superasteridae

Asteridae

Lamiidae

Campanulidae

Superrosidae

Rosidae

Malvidae

Fabidae
- MP state(s)

free (<5%)

free (<5%) / fused (>5%)

free (<5%)

fused (>5%)

free (<5%)

free (<5%)

free (<5%)

free (<5%)

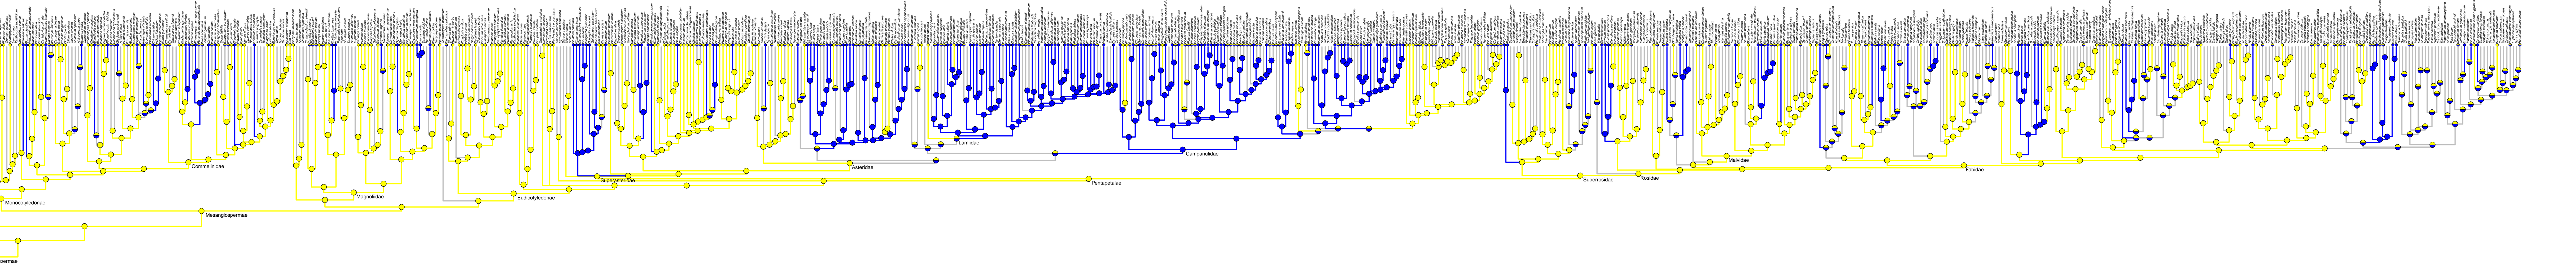

ML ancestral state reconstruction using rayDISC (R:corHMM)  
204\_A. Fusion of perianth (D2c), ER model

● free (<5%)

● fused (>5%)

Node

ML state

Prob

Angiospermae

free (<5%)

0.9331

Mesangiospermae

free (<5%)

0.9997

Magnoliidae

free (<5%)

0.9986

Monocotyledonae

free (<5%)

0.9986

Eudicotyledonae

free (<5%)

0.9998

Commelinidae

free (<5%)

0.9958

Pentapetalae

free (<5%)

0.9941

Superasteridae

free (<5%)

0.9599

Asteridae

free (<5%)

0.7092

Lamiidae

fused (>5%)

0.9799

Campanulidae

fused (>5%)

0.9731

Superrosidae

free (<5%)

0.995

Rosidae

free (<5%)

0.9954

| Model | LogL    | Npar | AIC    | AICc   | ΔAIC  | ΔAICc | wfree (<5%) | wfused (>5%) |
|-------|---------|------|--------|--------|-------|-------|-------------|--------------|
| ARD   | -225.91 | 2    | 455.81 | 455.81 | 0.00  | 0.00  | 0.1999      | 0.00996      |
| ARDeq | -225.33 | 2    | 454.65 | 454.67 | 0.62  | 0.34  | 0.0042      | 0.0037       |
| ER*   | -226.02 | 1    | 454.04 | 454.05 | 0     | 0     | 0.47        | 0.0041       |
| UNI01 | -238.92 | 1    | 479.85 | 479.85 | 25.81 | 0     | 0           | 0.0046       |
| UNI10 | -235.97 | 1    | 473.95 | 473.95 | 19.91 | 0     | 0           | 0.0077       |

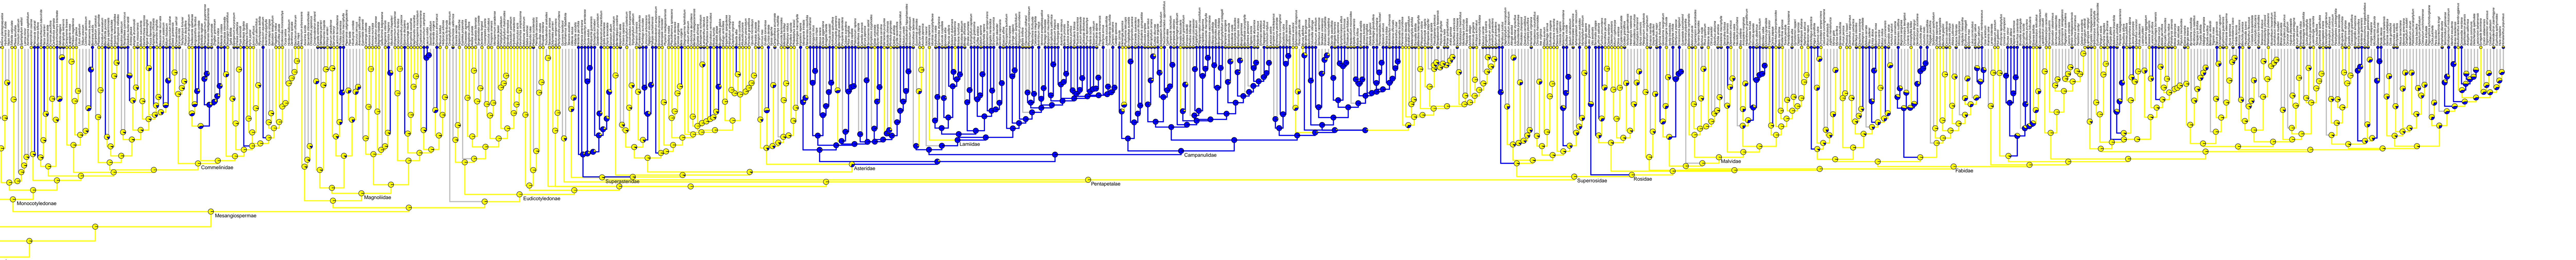

MP ancestral state reconstruction using ancestral.pars  
(R:phangorn)  
207\_A. Symmetry of perianth (binary) (D2d), 55 steps

**Node**

- Angiospermae
- Mesangiospermae
- Magnoliidae
- Monocotyledonae
- Eudicotyledonae
- Commelinidae
- Pentapetalae
- Superasteridae
- Asteridae
- Lamiidae
- Campanulidae
- Superrosidae
- Rosidae
- Malvidae
- Fabidae

**MP state(s)**

- actinomorphic

**Legend:**

- Yellow circle: actinomorphic
- Blue circle: zygomorphic

**Tree Labels:**

- Monocotyledonae
- Comelinidae
- Mesangiospermae

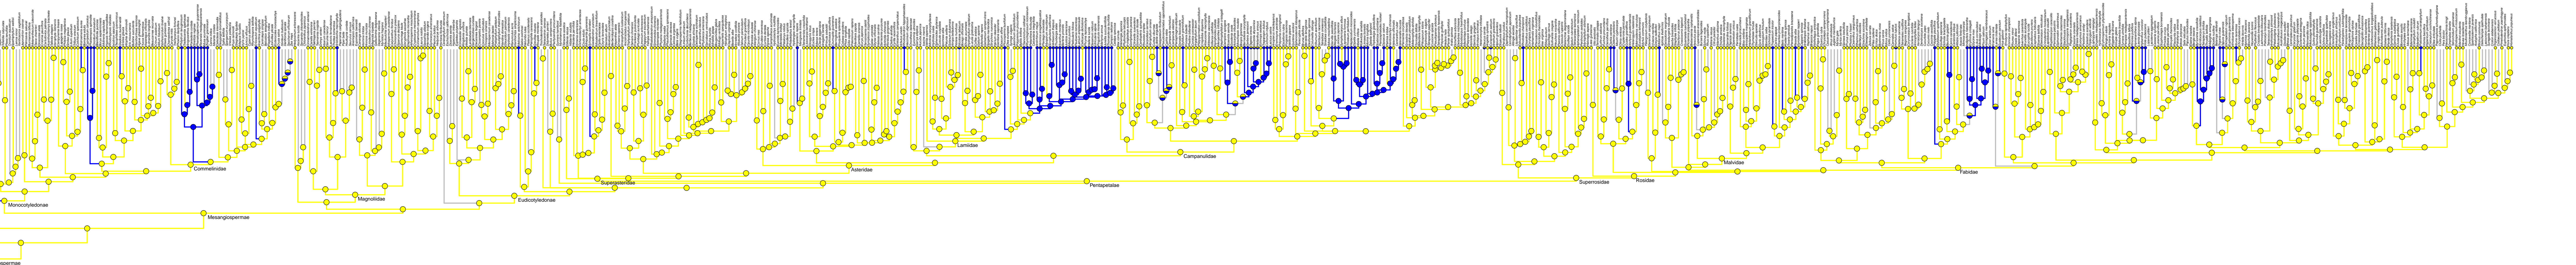

ML ancestral state reconstruction using rayDISC (R:corHMM)  
207\_A. Symmetry of perianth (binary) (D2d), ARDeq model

● actinomorphic  
● zygomorphic

| Model | LogL    | Npar | AIC    | AICc   | ΔAICc  | ΔAICc   | Prob   |
|-------|---------|------|--------|--------|--------|---------|--------|
| ARD   | -209.31 | 2    | 422.62 | 422.63 | 0      | 0.00012 | 0.999  |
| ARD** | -208.87 | 2    | 421.62 | 421.63 | 0      | 0.62    | 0.0013 |
| ER    | -217.31 | 1    | 436.62 | 436.63 | 15     | 0       | 0.0015 |
| UNI01 | -263.32 | 1    | 528.64 | 528.65 | 107.01 | 0       | 0.0018 |
| UNI10 | -218.34 | 1    | 438.68 | 438.69 | 17.06  | 0       | 0.0155 |

| Node            | ML state      | Prob   |
|-----------------|---------------|--------|
| Angiospermae    | actinomorphic | 0.9989 |
| Mesangiospermae | actinomorphic | 0.9997 |
| Magnoliidae     | actinomorphic | 0.9998 |
| Monocotyledonae | actinomorphic | 0.9961 |
| Eudicotyledonae | actinomorphic | 0.9997 |
| Commelinidae    | actinomorphic | 0.9951 |
| Pentapetalae    | actinomorphic | 1      |
| Superasteridae  | actinomorphic | 1      |
| Asteridae       | actinomorphic | 1      |
| Lamiidae        | actinomorphic | 0.9978 |
| Campanulidae    | actinomorphic | 1      |
| Superrosidae    | actinomorphic | 1      |
| Rosidae         | actinomorphic | 1      |

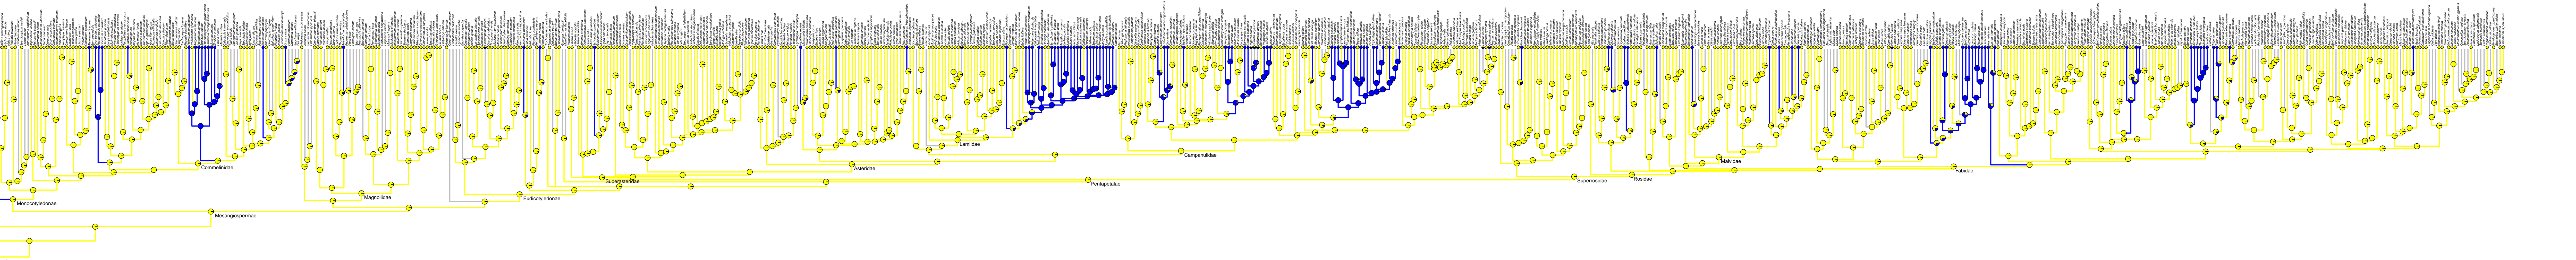



ML ancestral state reconstruction using rayDISC (R:corHMM)  
301\_B. Number of fertile stamens (3–state) (D2c), ARDeq model

● one to five (1–5)  
● six to ten (6–10)  
● more than ten (>10)

| Model   | LogL    | Npar | AIC     | Ast     | Delta | Prob   |
|---------|---------|------|---------|---------|-------|--------|
| ARD     | –495.55 | 6    | 1003.1  | 1003.1  | 0.000 | 0.9979 |
| ARD**   | –494.47 | 6    | 1003.1  | 1003.1  | 0.000 | 0.9977 |
| ER      | –534.45 | 1    | 1076.9  | 1076.9  | 73.8  | 1      |
| SYM     | –528.26 | 3    | 1062.5  | 1062.5  | 64.3  | 0.9997 |
| SYM*    | –527.94 | 3    | 1061.8  | 1061.8  | 60.9  | 0.9997 |
| ORD     | –510.04 | 4    | 1028.0  | 1028.0  | 25.7  | 0.9999 |
| ARDeq   | –509.49 | 4    | 1026.9  | 1027.0  | 27.9  | 0.9999 |
| ORDSYM  | –533.58 | 2    | 1071.16 | 1071.17 | 70.11 | 0.0041 |
| ORDSYM* | –533.2  | 2    | 1070.41 | 1070.42 | 69.36 | 0.0041 |
| ORDER   | –533.61 | 1    | 1069.23 | 1069.23 | 68.17 | 0.0042 |

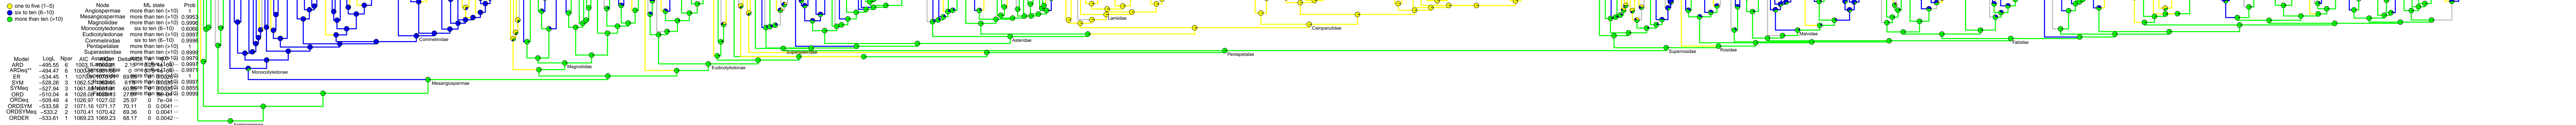









MP ancestral state reconstruction using ancestral.pars  
(R:phangorn)

331\_A. Number of androecium structural whorls (3–state) (D2c), 75 steps

- one (1)
- two (2)
- more than two (>2)

- | Node            | MP state(s)        |
|-----------------|--------------------|
| Angiospermae    | more than two (>2) |
| Mesangiospermae | more than two (>2) |
| Magnoliidae     | more than two (>2) |
| Monocotyledonae | two (2)            |
| Eudicotyledonae | more than two (>2) |
| Commelinidae    | two (2)            |
| Pentapetalae    | one (1)            |
| Superasteridae  | one (1)            |
| Asteridae       | one (1)            |
| Lamiidae        | one (1)            |
| Campanulidae    | one (1)            |
| Superrosidae    | one (1)            |
| Rosidae         | one (1)            |
| Malvidae        | one (1) / two (2)  |
| Fabidae         | one (1) / two (2)  |

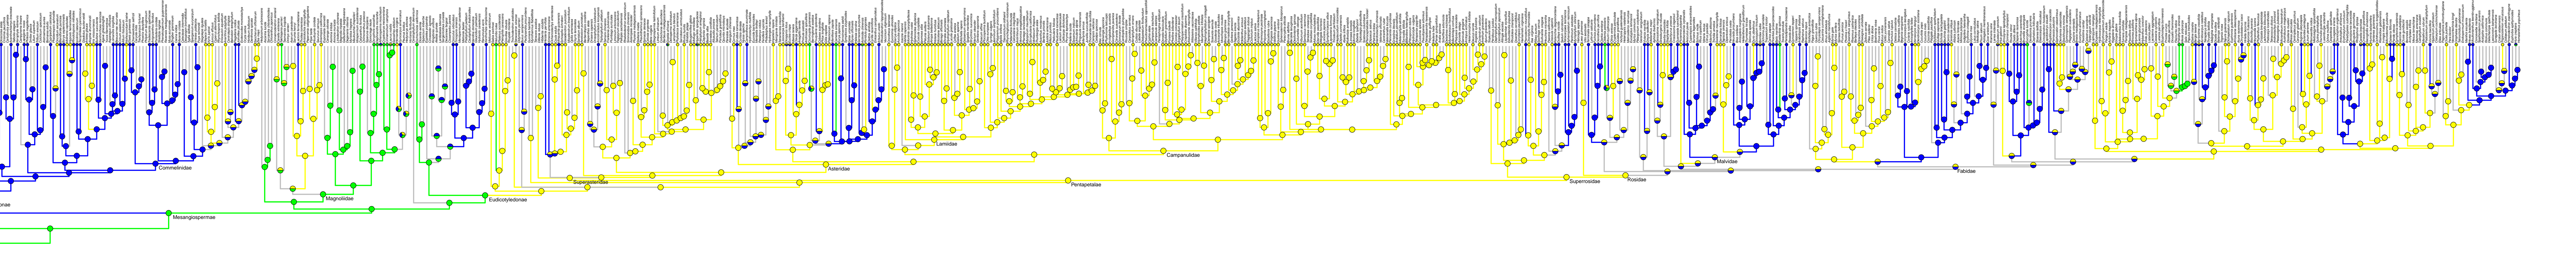

ML ancestral state reconstruction using rayDISC (R:corHMM)

331\_A. Number of androecium structural whorls (3-state) (D2c), ARDeq model

- one (1)  
● two (2)  
● more than two (>2)

| Model   | LogL    | Npar | AIC    | AICc   | ΔAIC  | ΔAICc | w     | wt    | wt0   |
|---------|---------|------|--------|--------|-------|-------|-------|-------|-------|
| ARD     | -231.14 | 6    | 474.28 | 474.28 | 0     | 0     | 0.999 | 0.999 | 0.999 |
| ARD*    | -230.09 | 6    | 472.09 | 472.09 | 2.19  | 2.19  | 0.999 | 0.999 | 0.999 |
| ER      | -278.89 | 1    | 559.79 | 559.79 | 85.51 | 85.51 | 0.001 | 0.001 | 0.001 |
| SYM     | -254.54 | 3    | 515.08 | 515.08 | 42.83 | 42.83 | 0.003 | 0.003 | 0.003 |
| SYM*    | -253.87 | 3    | 513.73 | 513.73 | 41.48 | 41.48 | 0.003 | 0.003 | 0.003 |
| ORD     | -233.57 | 4    | 475.15 | 475.15 | 2.91  | 2.91  | 0.007 | 0.007 | 0.007 |
| ORD*    | -232.53 | 4    | 473.05 | 473.05 | 0.82  | 0.82  | 0.010 | 0.010 | 0.010 |
| ORDSYM  | -255.21 | 2    | 514.43 | 514.44 | 42.16 | 42.16 | 0.003 | 0.003 | 0.003 |
| ORDSYM* | -254.47 | 2    | 512.94 | 512.95 | 40.67 | 40.67 | 0.003 | 0.003 | 0.003 |
| ORDER   | -260.43 | 1    | 522.85 | 522.86 | 50.57 | 50.57 | 0.002 | 0.002 | 0.002 |

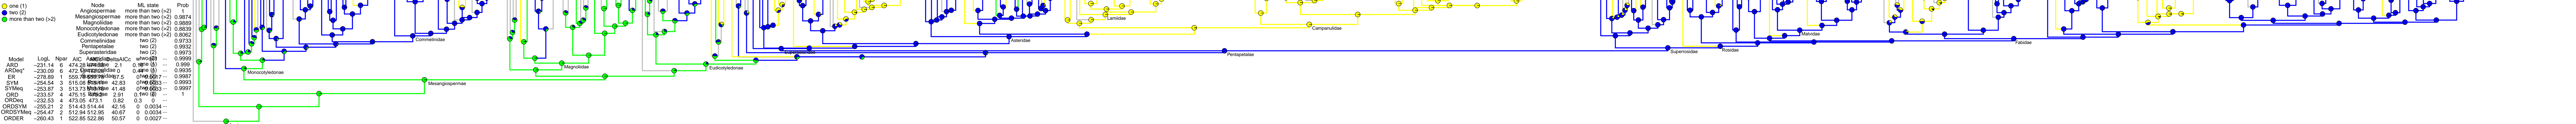

2. *A. Androecium structural merism (4-state) (D2c)*, 58 steps

|             |      |
|-------------|------|
| dimerous    | An   |
| trimerous   | Mesa |
| tetramerous | M    |
| pentamerous | M    |

|         |                         |
|---------|-------------------------|
| ermae   | trimerous / tetramerous |
| spermae | trimerous / tetramerous |
| edonae  | trimerous / tetramerous |
| edonae  | trimerous / tetramerous |
| inidae  | trimerous / tetramerous |
| etalae  | permerous / tetramerous |
| eridae  | permerous / tetramerous |
| dae     | permerous / tetramerous |
| dae     | permerous / tetramerous |
| ulidae  | permerous / tetramerous |
| isidae  | permerous / tetramerous |
| dae     | permerous / tetramerous |
| dae     | permerous / tetramerous |
| dae     | permerous / tetramerous |

Phylogenetic tree showing relationships between various plant groups. The tree is rooted on the left and branches out to the right. The groups labeled are: Monocotyledons (bottom), Equisetum (second from bottom), Gymnosperms (third from bottom), Angiosperms (fourth from bottom), and Embryophytes (top). The tree shows that Monocotyledons and Equisetum are sister groups, and Gymnosperms and Angiosperms are sister groups. Embryophytes is the most inclusive group shown.

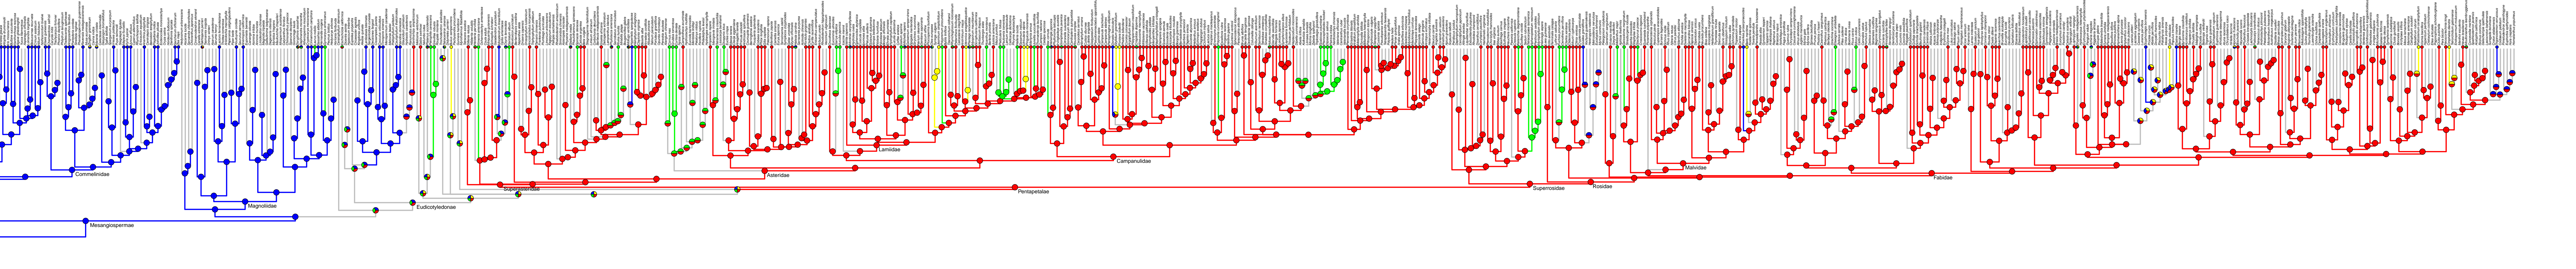

ML ancestral state reconstruction using rayDISC (R:corHMM)  
332\_A. Androecium structural merism (4-state) (D2c), SYMeq model

● dimerous  
● trimerous  
● tetramerous  
● pentamerous

| Model   | LogL    | Npar | AIC    | AICc   | DeltaAIC | DeltaAICc | Penalty | Weight  |
|---------|---------|------|--------|--------|----------|-----------|---------|---------|
| ARD     | -222.67 | 12   | 469.34 | 469.34 | 10.15    | 10.15     | 0.999   | 1       |
| ARDeq   | -221.79 | 12   | 467.53 | 467.53 | 1.81     | 1.81      | 0.999   | 1       |
| ER      | -238.24 | 1    | 478.94 | 478.94 | 19.60    | 19.60     | 0.001   | 0       |
| SYM     | -225    | 6    | 462.42 | 462.42 | 2.51     | 2.51      | 0.999   | 1       |
| SYMeq** | -223.74 | 6    | 459.49 | 459.49 | 0        | 0         | 0.999   | 1       |
| ORD     | -236.2  | 6    | 484.41 | 484.41 | 24.97    | 24.97     | 0.001   | 0       |
| ORDeq   | -236.6  | 6    | 485.2  | 485.31 | 25.71    | 25.71     | 0       | 0.99737 |
| ORDSYM  | -259.1  | 3    | 524.2  | 524.23 | 64.64    | 64.64     | 0       | 0.002   |
| ORDSYMq | -258.18 | 3    | 522.35 | 522.38 | 62.79    | 62.79     | 0       | 0.002   |
| ORDER   | -260.1  | 1    | 522.21 | 522.21 | 62.62    | 62.62     | 0       | 0.003   |

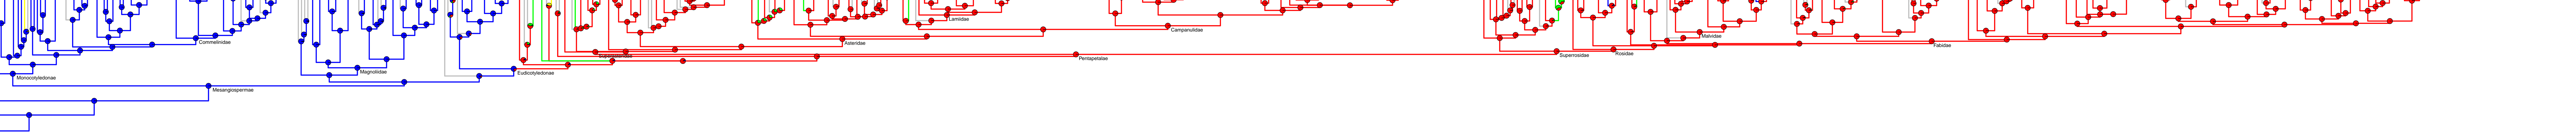







ML ancestral state reconstruction using rayDISC (R:corHMM)  
305\_A. Filament (binary) (D2d), ARDeq model

● laminar (wide)  
● typical (narrow)

| Node            | ML state         | Prob   |
|-----------------|------------------|--------|
| Angiospermae    | laminar (wide)   | 0.9909 |
| Mesangiospermae | laminar (wide)   | 0.8185 |
| Magnoliidae     | laminar (wide)   | 0.981  |
| Monocotyledonae | typical (narrow) | 0.5102 |
| Eudicotyledonae | typical (narrow) | 0.8083 |
| Commelinidae    | typical (narrow) | 0.7418 |
| Pentapetalae    | typical (narrow) | 0.9996 |
| Superasteridae  | typical (narrow) | 0.9998 |
| Asteridae       | typical (narrow) | 0.9997 |
| Lamiidae        | typical (narrow) | 0.9989 |
| Campanulidae    | typical (narrow) | 0.9959 |
| Superrosidae    | typical (narrow) | 0.9998 |
| Rosidae         | typical (narrow) | 0.9998 |

| Model   | LogL    | Npar | AIC    | AICc   | ΔAIC  | ΔAICc | Bayes factor | Posterior probability |
|---------|---------|------|--------|--------|-------|-------|--------------|-----------------------|
| ARD     | -172.12 | 2    | 348.24 | 348.25 | 0.07  | 0.00  | 0.58         | 0.0021                |
| ARDex** | -171.79 | 2    | 347.57 | 347.59 | 0.07  | 0.00  | 0.58         | 0.0021                |
| ER      | -177.98 | 1    | 357.96 | 357.97 | 10.38 | 0     | 0.0023       | 0.0023                |
| UNI01   | -189.97 | 1    | 381.95 | 381.95 | 34.36 | 0     | 0.0136       |                       |
| UNI10   | -189.94 | 1    | 381.87 | 381.88 | 34.29 | 0     | 0.0022       |                       |

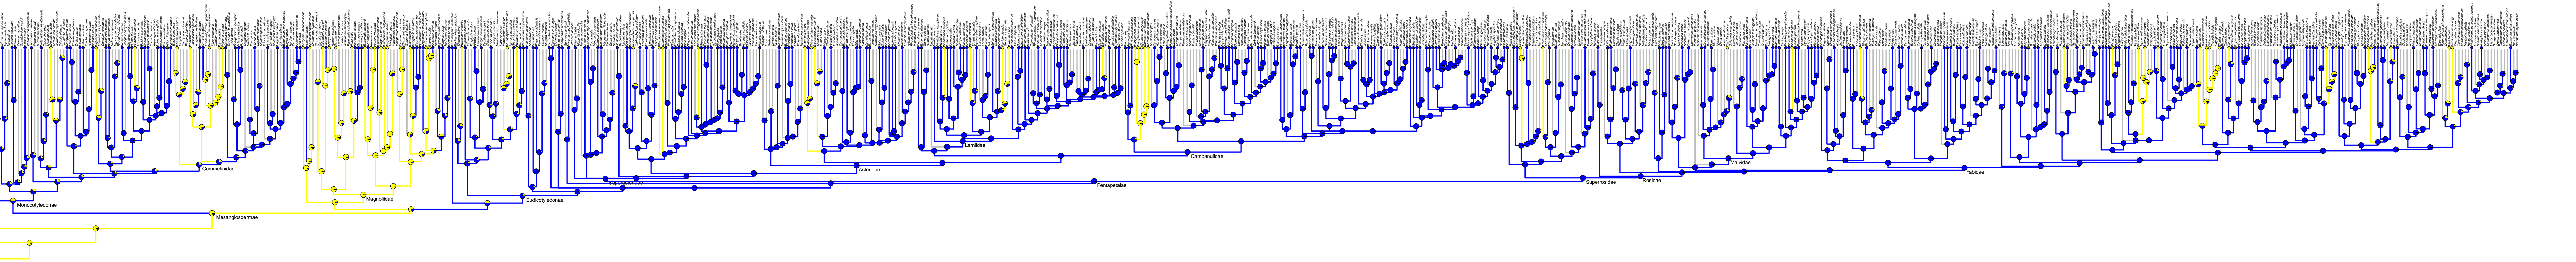

MP ancestral state reconstruction using ancestral.pars  
(R:phangorn)

311\_A. Anther orientation (D2d), 108 steps

|  | Node            | MP state(s) |
|--|-----------------|-------------|
|  | Angiospermae    | introrse    |
|  | Mesangiospermae | introrse    |
|  | Magnoliidae     | extrorse    |
|  | Monocotyledonae | introrse    |
|  | Eudicotyledonae | extrorse    |
|  | Commelinidae    | introrse    |
|  | Pentapetalae    | introrse    |
|  | Superasteridae  | introrse    |
|  | Asteridae       | introrse    |
|  | Lamiidae        | introrse    |
|  | Campanulidae    | introrse    |
|  | Superrosidae    | introrse    |
|  | Rosidae         | introrse    |
|  | Malvidae        | introrse    |
|  | Fabidae         | introrse    |

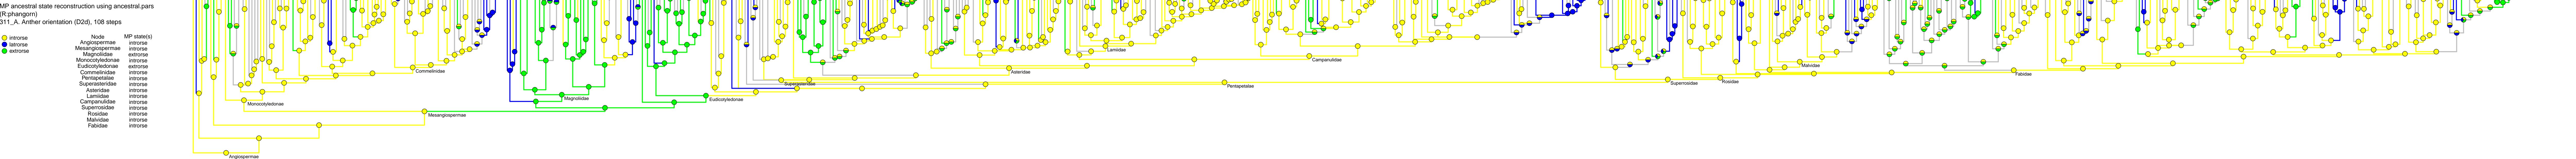

ML ancestral state reconstruction using rayDISC (R:corHMM)

| Model | LogL    | Npar | AIC    | AIC <sub>ML</sub> | AIC <sub>ML</sub> Cc | Rosidae | intra  | wintra | total  |
|-------|---------|------|--------|-------------------|----------------------|---------|--------|--------|--------|
| ARD   | -342.48 | 6    | 696.95 | 697.06            | 0.86                 | 0.11    | 0.00   | 0.9998 | 0.9999 |
| ARDeq | -341.91 | 6    | 695.81 | 695.92            | 0.82                 | 0.2     | 0.0033 | ...    | ...    |
| ER*   | -346.55 | 1    | 695.1  | 695.1             | 0                    | 0.29    | 0.0026 | ...    | ...    |
| SYM   | -345.39 | 3    | 696.77 | 696.81            | 1.7                  | 0.13    | 0.0029 | ...    | ...    |
| SYMeq | -344.6  | 3    | 695.2  | 695.23            | 0.13                 | 0.28    | 0.0029 | ...    | ...    |

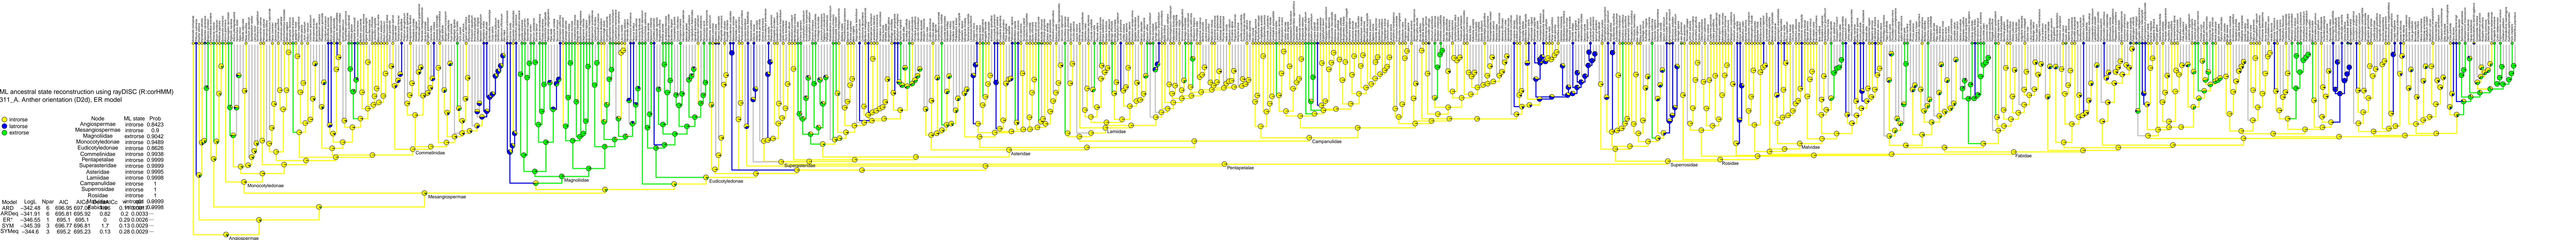

MP ancestral state reconstruction using ancestral.pars  
(R:phangorn)  
312\_A. Anther attachment (binary) (D2d), 96 steps

● basifixed  
● dorsifixed

Node  
Angiospermae  
Mesangiospermae  
Magnoliidae  
Monocotyledonae  
Eudicotyledonae  
Commelinidae  
Pentapetalae  
Superasteridae  
Asteridae  
Lamiidae  
Campanulidae  
Superrosidae  
Rosidae  
Malvidae  
Fabidae

MP state(s)  
basifixed  
basifixed / dorsifixed  
basifixed  
dorsifixed  
dorsifixed  
dorsifixed

Monocotyledonae

Mesangiospermae

Magnoliidae

Eudicotyledonae

Superasteridae

Asteridae

Lamiidae

Campanulidae

Superrosidae

Rosidae

Malvidae

Fabidae

Angiospermae

Monocotyledonae

Mesangiospermae

Magnoliidae

Eudicotyledonae

Superasteridae

Asteridae

Lamiidae

Campanulidae

Superrosidae

Rosidae

Malvidae

Fabidae

Angiospermae

Monocotyledonae

Mesangiospermae

Magnoliidae

Eudicotyledonae

Superasteridae

Asteridae

Lamiidae

Campanulidae

Superrosidae

Rosidae

Malvidae

Fabidae

ML ancestral state reconstruction using rayDISC (R:corHMM)  
312\_A. Anther attachment (binary) (D2d), ARDeq model

● basifixed  
● dorsifixed

| Node            | ML state   | Prob                                    |
|-----------------|------------|-----------------------------------------|
| Angiospermae    | basifixed  | 0.9767                                  |
| Mesangiospermae | basifixed  | 0.941                                   |
| Magnoliidae     | basifixed  | 0.972                                   |
| Monocotyledonae | basifixed  | 0.9235                                  |
| Eudicotyledonae | basifixed  | 0.6727                                  |
| Commelinidae    | basifixed  | 0.9329                                  |
| Pentapetalae    | dorsifixed | 0.9377                                  |
| Superasteridae  | dorsifixed | 0.9445                                  |
| Asteridae       | dorsifixed | 0.9264                                  |
| Lamiidae        | dorsifixed | 0.7008                                  |
| Campanulidae    | dorsifixed | 0.9812                                  |
| Superrosidae    | dorsifixed | 0.9456                                  |
| Rosidae         | dorsifixed | 0.9694                                  |
| Malvaceae       | dorsifixed | 0.9732                                  |
| Malvaceae       | dorsifixed | 0.9936                                  |
| ARD**           | -264.62    | 2 533.25 533.26 0 0.52 0.004 0.0074     |
| ER              | -267.47    | 1 536.94 536.94 3.68 0.08 0.0055 0.0055 |
| UNI01           | -295.34    | 1 592.68 592.69 59.43 0 0.0058          |
| UNI10           | -276.74    | 1 555.48 555.48 22.22 0 0.0076          |

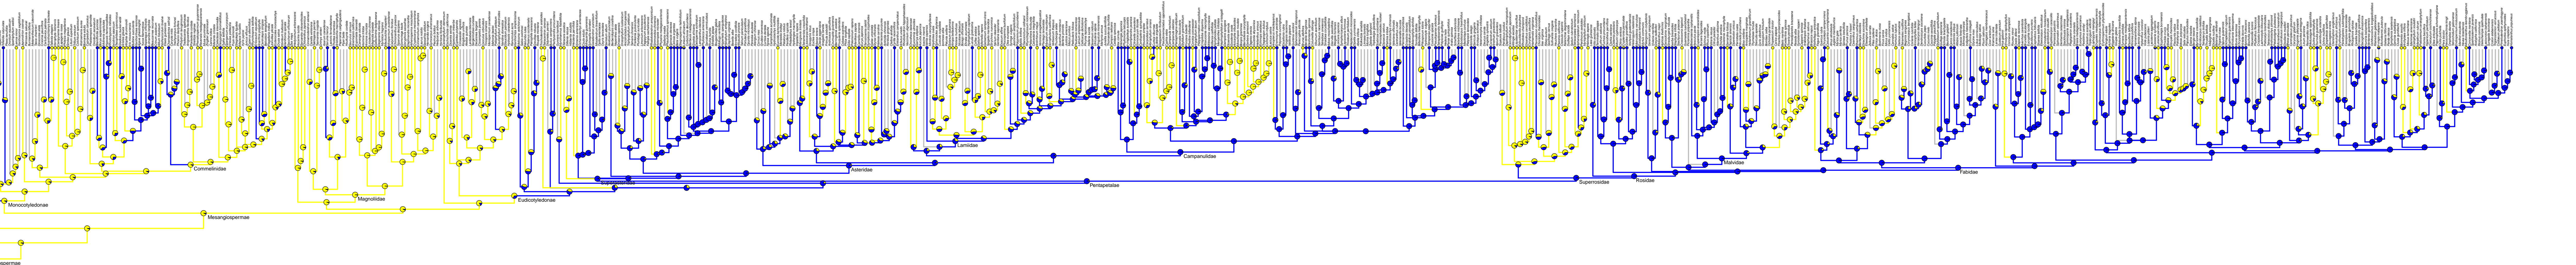



ML ancestral state reconstruction using rayDISC (R:corHMM)  
313\_A. Anther dehiscence (3-state) (D2d), ARDeq model

● longitudinal slit  
● H-valvate  
● flap-valvate

| Node            | ML state          | Prob   |
|-----------------|-------------------|--------|
| Angiospermae    | longitudinal slit | 1      |
| Mesangiospermae | longitudinal slit | 1      |
| Magnoliidae     | longitudinal slit | 0.9601 |
| Monocotyledonae | longitudinal slit | 1      |
| Eudicotyledonae | longitudinal slit | 1      |
| Commelinidae    | longitudinal slit | 1      |
| Pentapetalae    | longitudinal slit | 1      |
| Superasteridae  | longitudinal slit | 1      |
| Asteridae       | longitudinal slit | 1      |
| Lamiidae        | longitudinal slit | 1      |
| Campanulidae    | longitudinal slit | 1      |
| Superrosidae    | longitudinal slit | 1      |
| Rosidae         | longitudinal slit | 1      |
| Angiospermae    | longitudinal slit | 1      |

| Model  | LogL   | Npar | AIC    | AICc   | ML state          | Prob           |
|--------|--------|------|--------|--------|-------------------|----------------|
| ARD    | -55.64 | 6    | 123.27 | 123.33 | longitudinal slit | 1              |
| ARDeq* | -54.65 | 6    | 123.22 | 121.33 | longitudinal slit | 0.45 2e-04 ... |
| ER     | -60.71 | 1    | 123.41 | 123.42 | longitudinal slit | 0.16 2e-04 ... |
| SYM    | -59.7  | 3    | 125.41 | 125.44 | longitudinal slit | 0.06 2e-04 ... |
| SYMeq  | -58.61 | 3    | 123.21 | 123.24 | longitudinal slit | 0.17 2e-04 ... |

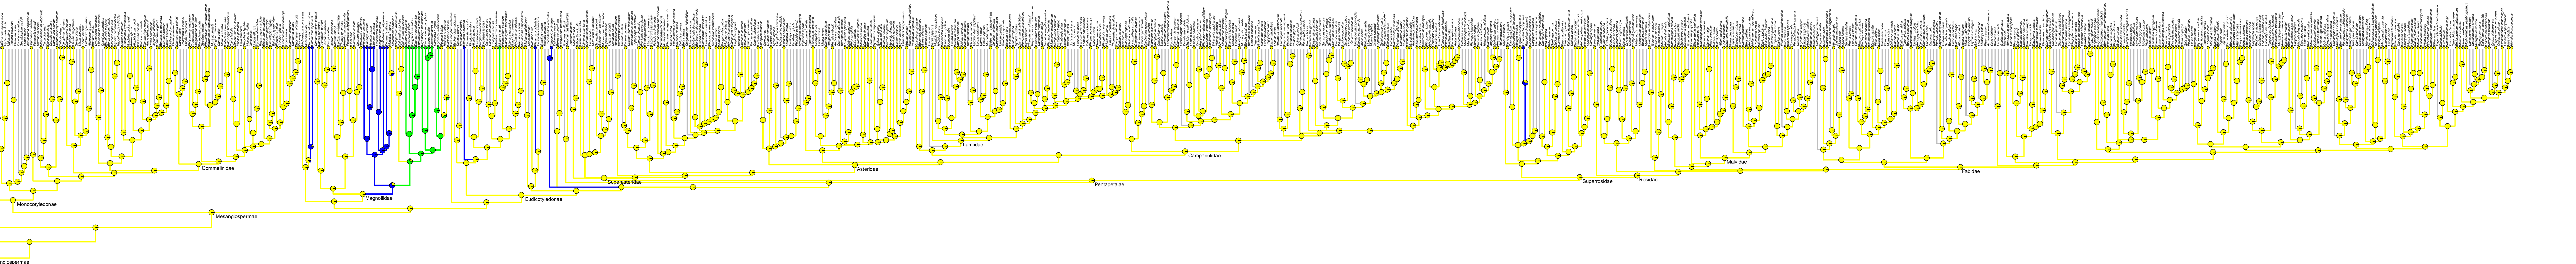



ML ancestral state reconstruction using rayDISC (R:corHMM)  
401\_B. Number of structural carpels (5-state) (D2c), ARDeq model

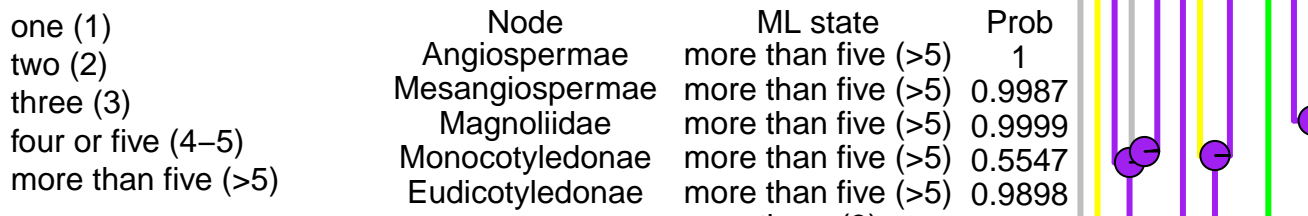

| Model    | LogL    | Npar | AIC     | Ast     | Delta AIC  | Delta Ast  | Prob   |
|----------|---------|------|---------|---------|------------|------------|--------|
| ARD      | -673.8  | 20   | 1387.6  | 19.5    | 0.0018 ... | 0.0018 ... | 0.9975 |
| ARDeq*** | -664.05 | 20   | 1368.0  | 0       | 0.0018 ... | 0.0018 ... | 0.955  |
| ER       | -717.7  | 1    | 1437.9  | 68.4    | 0.0018 ... | 0.0018 ... | 0.9997 |
| SYM      | -684.01 | 10   | 1385.0  | 16.9    | 0.0018 ... | 0.0018 ... | 0.9996 |
| SYMeq    | -682.89 | 10   | 1385.7  | 16.8    | 0.0018 ... | 0.0018 ... | 0.9991 |
| ORD      | -756.1  | 8    | 1528.1  | 159.1   | 0.0004 ... | 0.0004 ... | 1      |
| ORDeq    | -755.12 | 8    | 1526.24 | 157.22  | 0.0004 ... | 0.0004 ... | 1      |
| ORDSYM   | -759.4  | 4    | 1526.81 | 1526.86 | 157.66     | 0.0004 ... | ...    |
| ORDSYMeq | -758.64 | 4    | 1525.29 | 1525.34 | 156.14     | 0.0004 ... | ...    |
| ORDER    | -764.7  | 1    | 1531.41 | 1531.41 | 162.21     | 0.0005 ... | ...    |

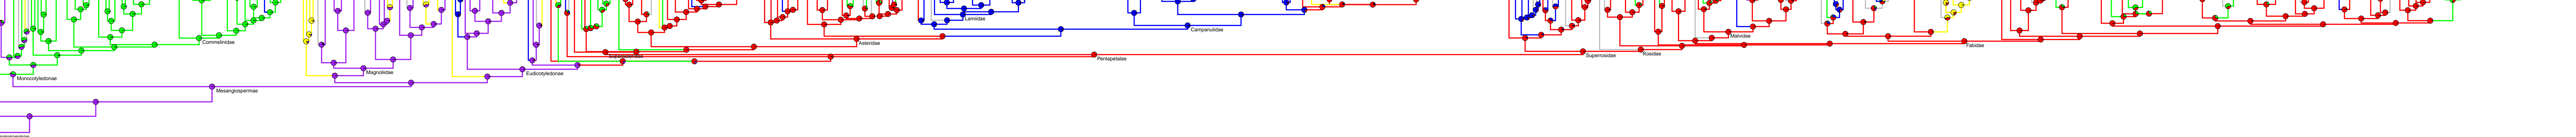

MP ancestral state reconstruction using ancestral.pars  
(R:phangorn)  
400\_A. Gynoecium phyllotaxy (D2d), 10 steps

| Node            | MP state(s)      |
|-----------------|------------------|
|                 | whorled / spiral |
| Angiospermae    | whorled          |
| Mesangiospermae | whorled          |
| Magnoliidae     | whorled          |
| Monocotyledonae | whorled          |
| Eudicotyledonae | whorled          |
| Commelinidae    | whorled          |
| Pentapetalae    | whorled          |
| Superasteridae  | whorled          |
| Asteridae       | whorled          |
| Lamiidae        | whorled          |
| Campanulidae    | whorled          |
| Superrosidae    | whorled          |
| Rosidae         | whorled          |
| Malvidae        | whorled          |
| Fabidae         | whorled          |

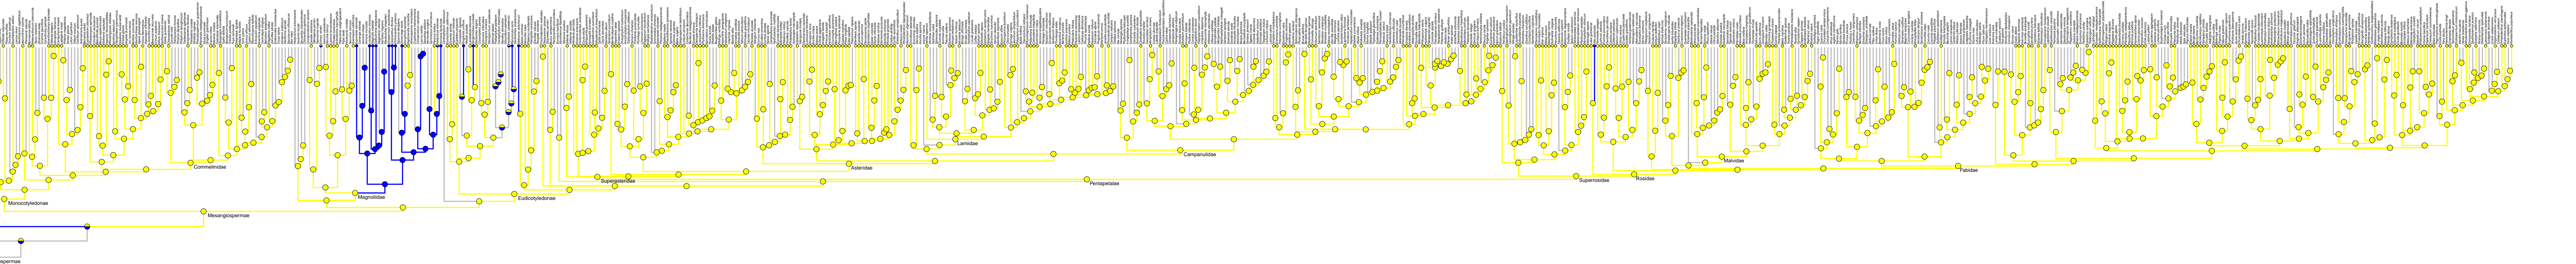

ML ancestral state reconstruction using rayDISC (R:corHMM)  
400\_A. Gynoecium phyllotaxy (D2d), ARDeq model

● whorled  
● spiral

| Node            | ML state | Prob   |
|-----------------|----------|--------|
| Angiospermae    | spiral   | 1      |
| Mesangiospermae | spiral   | 0.9998 |
| Magnoliidae     | spiral   | 0.9997 |
| Monocotyledonae | whorled  | 0.6307 |
| Eudicotyledonae | spiral   | 0.9987 |
| Commelinidae    | whorled  | 0.9999 |
| Pentapetalae    | whorled  | 0.9748 |
| Superasteridae  | whorled  | 0.9943 |
| Asteridae       | whorled  | 1      |
| Lamiidae        | whorled  | 1      |
| Campanulidae    | whorled  | 1      |
| Superrosidae    | whorled  | 0.9786 |
| Rosidae         | whorled  | 0.9787 |
| Malvaceae       | whorled  | 0.910  |

| Model             | LogL   | Npar | AIC    | AIC <sub>mod</sub> | AIC <sub>diff</sub> | Prob       | q10    |
|-------------------|--------|------|--------|--------------------|---------------------|------------|--------|
| ARD               | -38.72 | 2    | 81.45  | 80.07              | 1.38                | 0.0068     | 0.0068 |
| ARD <sup>eq</sup> | -38.03 | 2    | 80.06  | 80.07              | 0                   | 0.62 1e-04 | 0.0068 |
| ER                | -49.53 | 1    | 101.05 | 101.06             | 20.98               | 0 4e-04    | 4e-04  |
| UNI01             | -51.24 | 1    | 104.47 | 104.48             | 24.4                | 0 4e-04    |        |
| UNI10             | -41.33 | 1    | 84.65  | 84.66              | 4.58                | 0.06       | 0.008  |

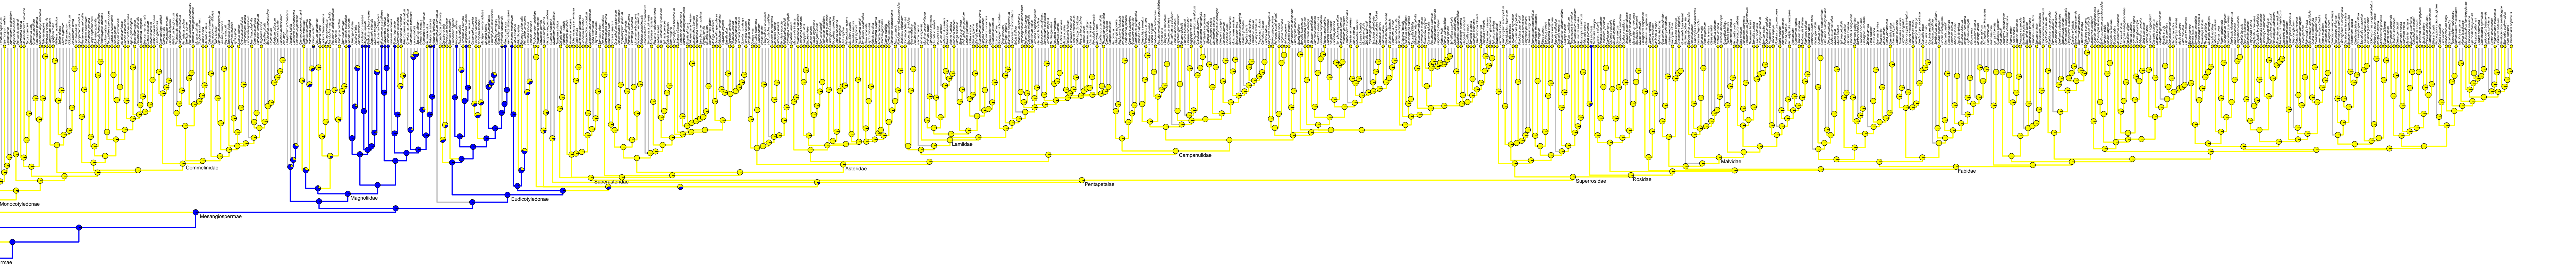



ML ancestral state reconstruction using rayDISC (R:corHMM)  
403\_A. Fusion of ovaries (binary) (D2c), ARDeq model

● free (<5%)  
● fused (>5%)

| Node            | ML state    | Prob   |
|-----------------|-------------|--------|
| Angiospermae    | free (<5%)  | 0.9992 |
| Mesangiospermae | free (<5%)  | 0.9992 |
| Magnoliidae     | free (<5%)  | 0.9992 |
| Monocotyledonae | free (<5%)  | 0.8142 |
| Eudicotyledonae | free (<5%)  | 0.9956 |
| Commelinidae    | fused (>5%) | 0.9999 |
| Pentapetalae    | fused (>5%) | 0.9974 |
| Superasteridae  | fused (>5%) | 0.9978 |
| Asteridae       | fused (>5%) | 1      |
| Lamiidae        | fused (>5%) | 1      |
| Campanulidae    | fused (>5%) | 1      |
| Superrosidae    | fused (>5%) | 0.9998 |
| Rosidae         | fused (>5%) | 0.9999 |
| Malvaceae       | fused (>5%) | 0.9999 |

| Model   | LogL    | Npar | AIC    | AICc   | ΔAICc | q10    |
|---------|---------|------|--------|--------|-------|--------|
| ARD     | -94.72  | 2    | 193.43 | 193.07 | 0.36  | 0.9999 |
| ARDeq** | -94.03  | 2    | 192.05 | 192.07 | 0     | 0.66   |
| ER      | -100.22 | 1    | 202.44 | 202.44 | 10.38 | 7e-04  |
| UNI01   | -100.89 | 1    | 203.79 | 203.79 | 11.72 | 0.0102 |
| UNI10   | -105.42 | 1    | 212.84 | 212.84 | 20.78 | 8e-04  |

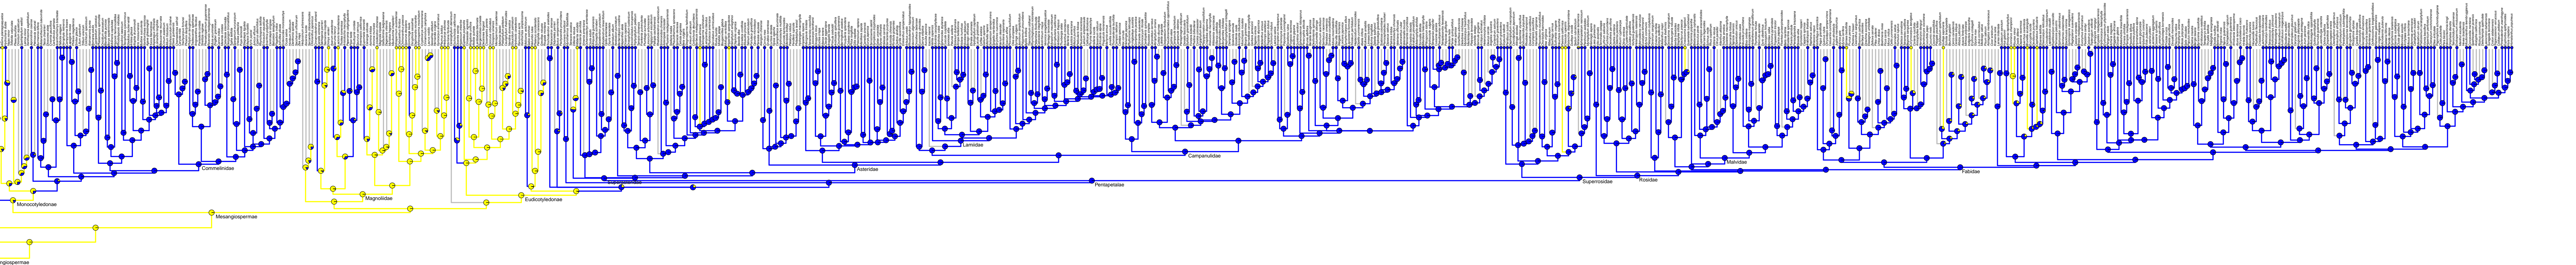

Supplement: Supplementary Data 22 [file ncomms16047-s23.pdf]
