# Supplementary material for: The ancestral flower of angiosperms and its early diversification
Source: Nat Commun. 2017 Aug 1;8:16047. doi: 10.1038/ncomms16047 (PMC5543309; doi:10.1038/ncomms16047)

ancestral state reconstruction using rayDISC (R:corHMM)

Q A. Functional sex of flowers (D2d), ARDeg model

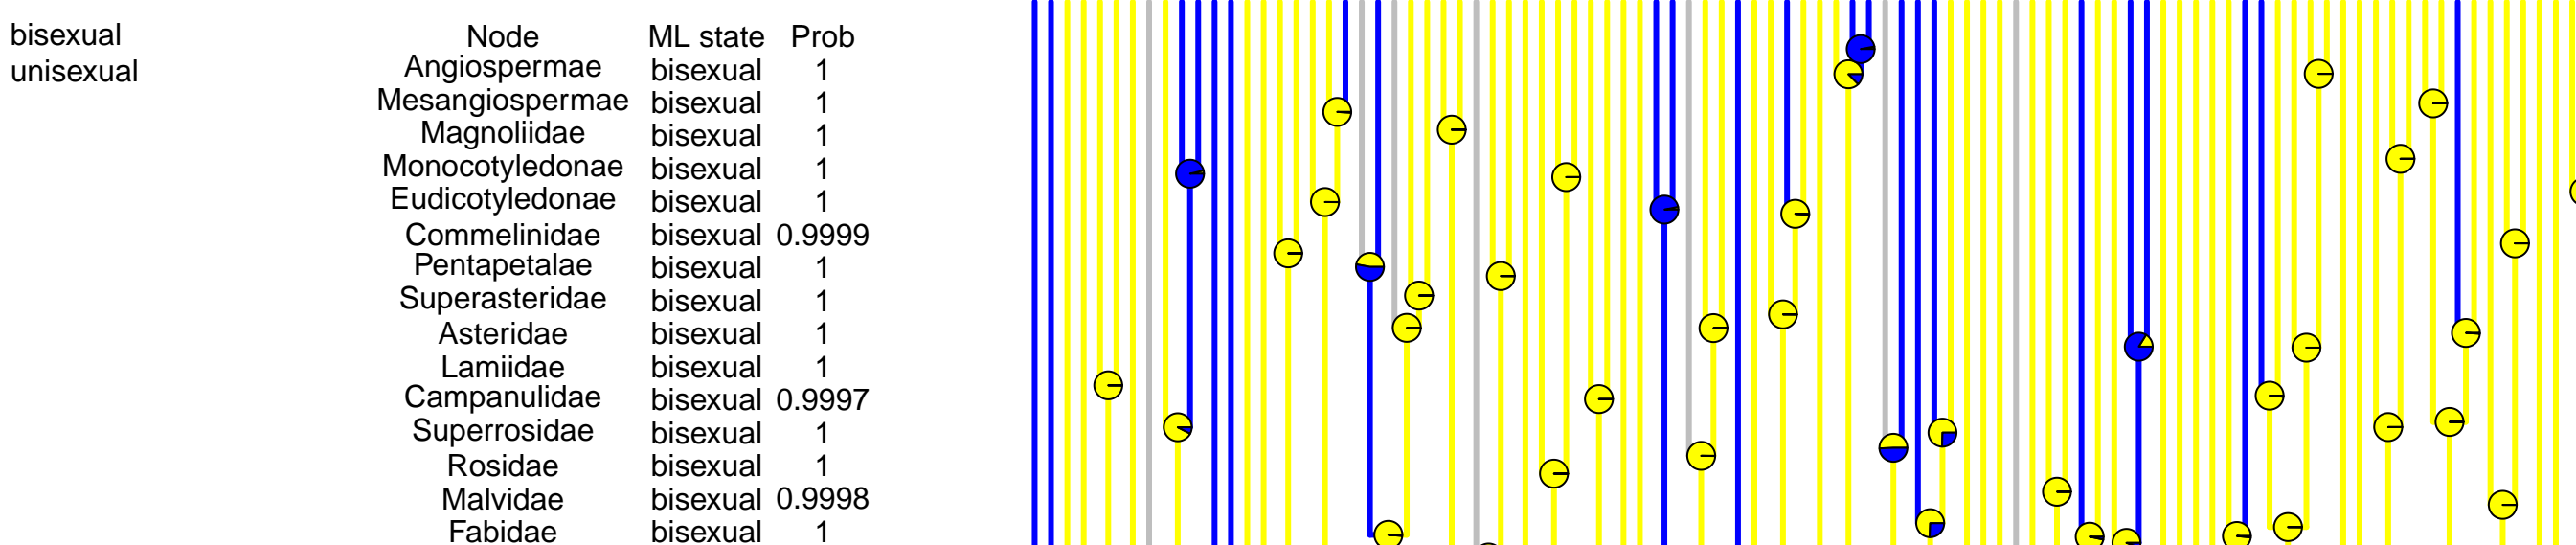

| Model | LogL    | Npar | AIC    | AICc   | DeltaAICc | w    | q01    | q10    |
|-------|---------|------|--------|--------|-----------|------|--------|--------|
| RD    | -312.19 | 2    | 628.38 | 628.39 | 1.39      | 0.22 | 0.003  | 6e-04  |
| Deq*  | -311.5  | 2    | 626.99 | 627.01 | 0         | 0.44 | 0.003  | 6e-04  |
| R     | -315.39 | 1    | 632.78 | 632.79 | 5.78      | 0.02 | 0.0029 | 0.0029 |
| NI01  | -312.84 | 1    | 627.68 | 627.69 | 0.68      | 0.31 | 0.003  |        |
| NI10  | -355.44 | 1    | 712.88 | 712.88 | 85.87     | 0    |        | 0.0117 |

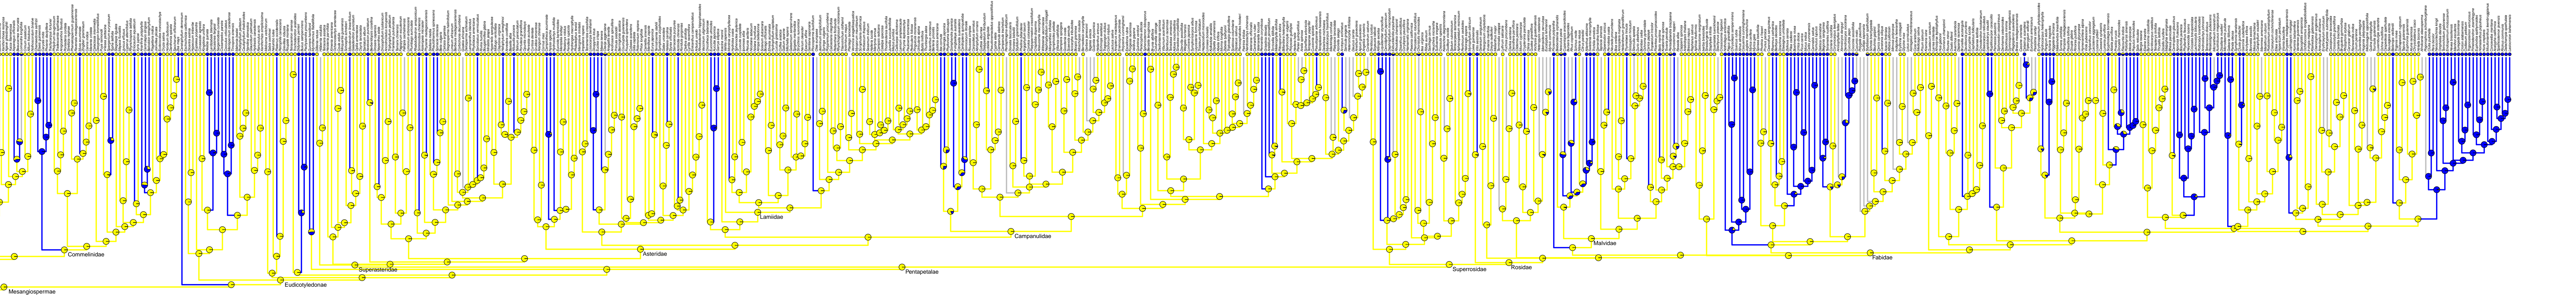





ancestral state reconstruction using ancestral.pars  
(phangorn)

B. Ovary position (binary) (D2d), 80 steps

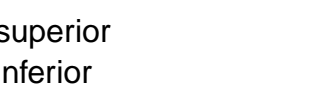

|       | MP state(s) |
|-------|-------------|
| nae   | superior    |
| irmae | superior    |
| ae    | superior    |
| onae  | superior    |
| onae  | superior    |
| dae   | superior    |
| ae    | superior    |
| dae   | superior    |
| e     | superior    |
| dae   | superior    |
| ae    | superior    |
| e     | superior    |
|       | superior    |

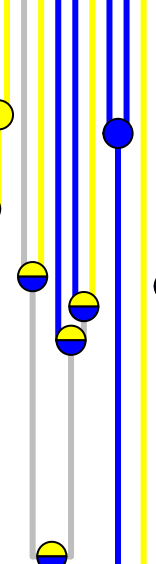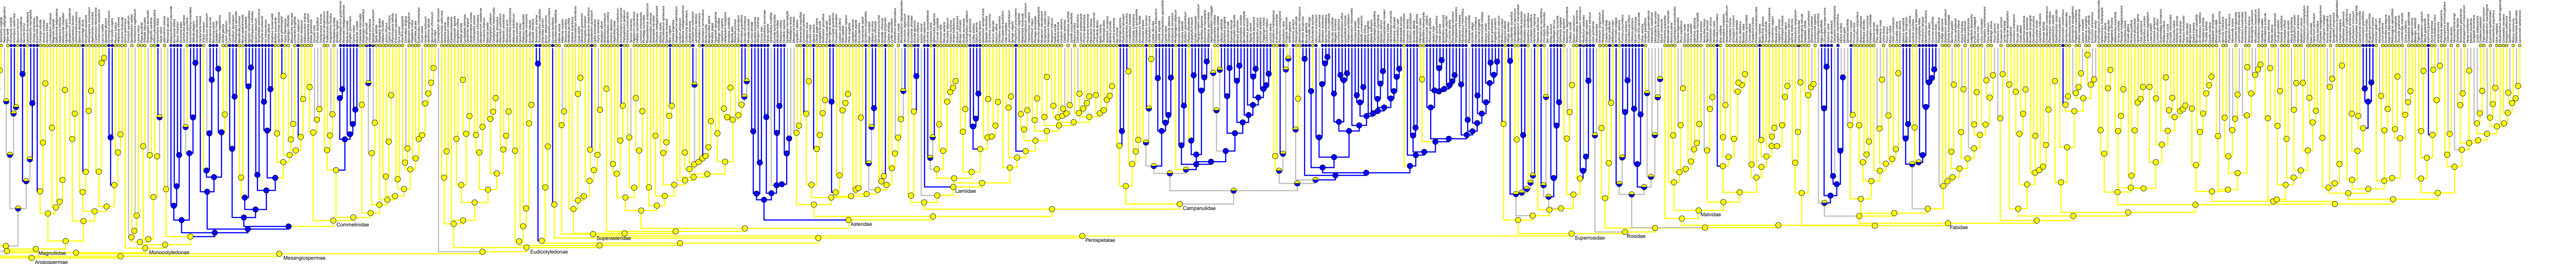





ML ancestral state reconstruction using rayDISC (R:corHMM)  
201\_A. Perianth presence (D2c). UNI10 model

● absent  
● present

| Node            | ML state | Prob |
|-----------------|----------|------|
| Angiospermae    | present  | 1    |
| Mesangiospermae | present  | 1    |
| Magnoliidae     | present  | 1    |
| Monocotyledonae | present  | 1    |
| Eudicotyledonae | present  | 1    |
| Commelinidae    | present  | 1    |
| Pentapetalae    | present  | 1    |
| Superasteridae  | present  | 1    |
| Asteridae       | present  | 1    |
| Lamiidae        | present  | 1    |
| Campanulidae    | present  | 1    |
| Superrosidae    | present  | 1    |
| Rosidae         | present  | 1    |
| Malvidae        | present  | 1    |
| Fabidae         | present  | 1    |

| Model  | LogL    | Npar | AIC    | AICc   | DeltaAICc | w    | q01    | q10   |
|--------|---------|------|--------|--------|-----------|------|--------|-------|
| ARD    | -95.71  | 2    | 195.41 | 195.43 | 2.01      | 0.13 | 0      | 5e-04 |
| ARDeq  | -95.01  | 2    | 194.03 | 194.04 | 0.62      | 0.26 | 0      | 5e-04 |
| ER     | -96.02  | 1    | 194.05 | 194.05 | 0.63      | 0.26 | 5e-04  | 5e-04 |
| UNI01  | -108.51 | 1    | 219.02 | 219.02 | 25.61     | 0    | 0.0222 |       |
| UNI10* | -95.71  | 1    | 193.41 | 193.42 | 0         | 0.35 |        | 5e-04 |

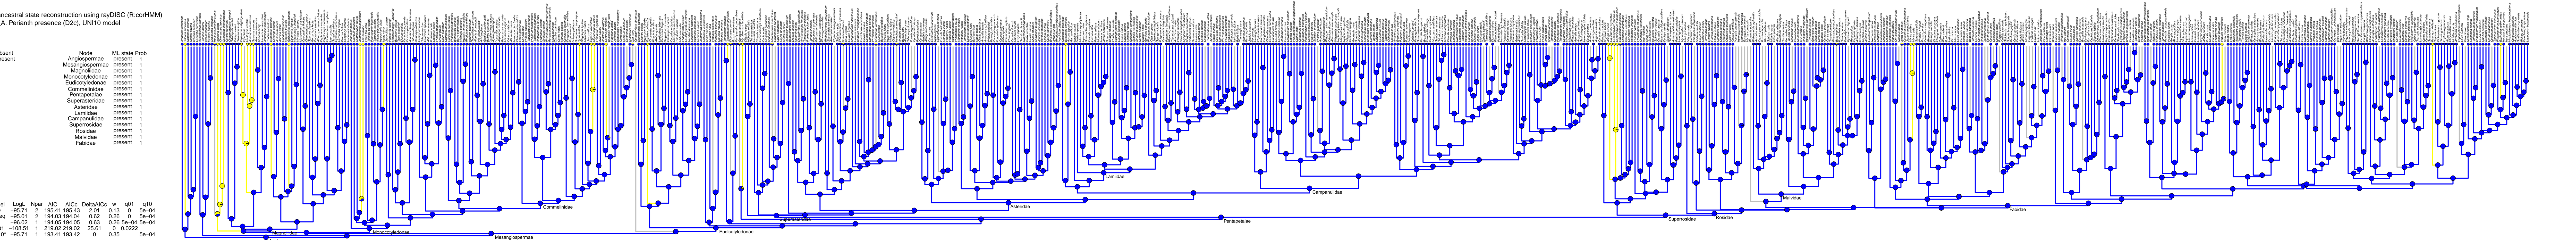

[illegible][illegible]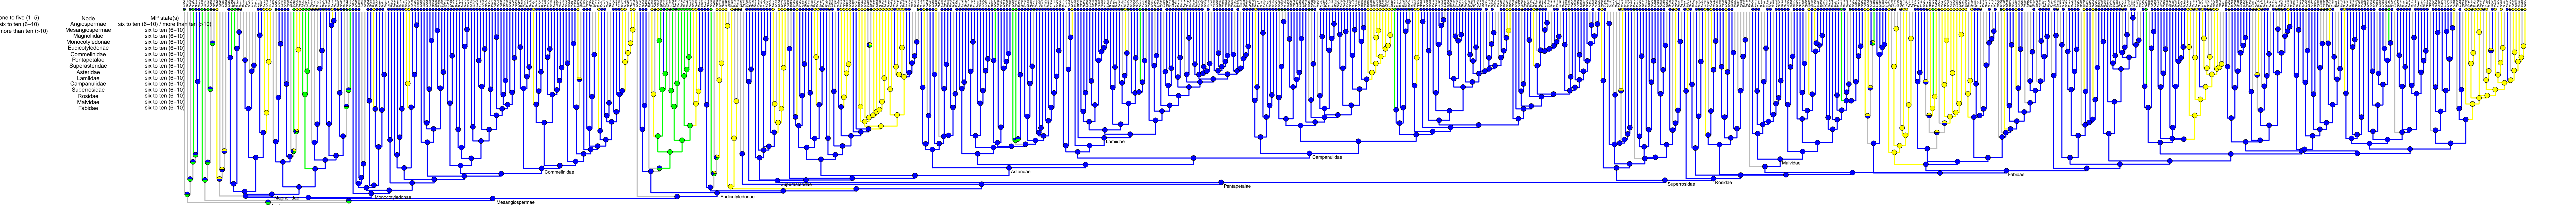

ML ancestral state reconstruction using rayDISC (R:corHMM)  
201\_B. Number of perianth parts (3-state) (D2c), ARDeq model

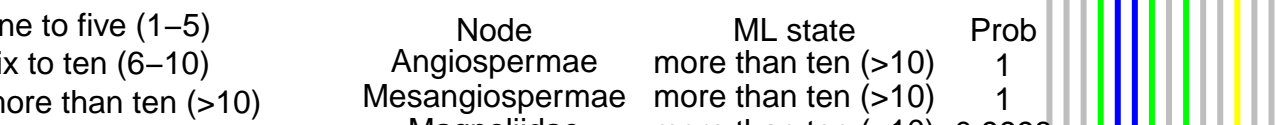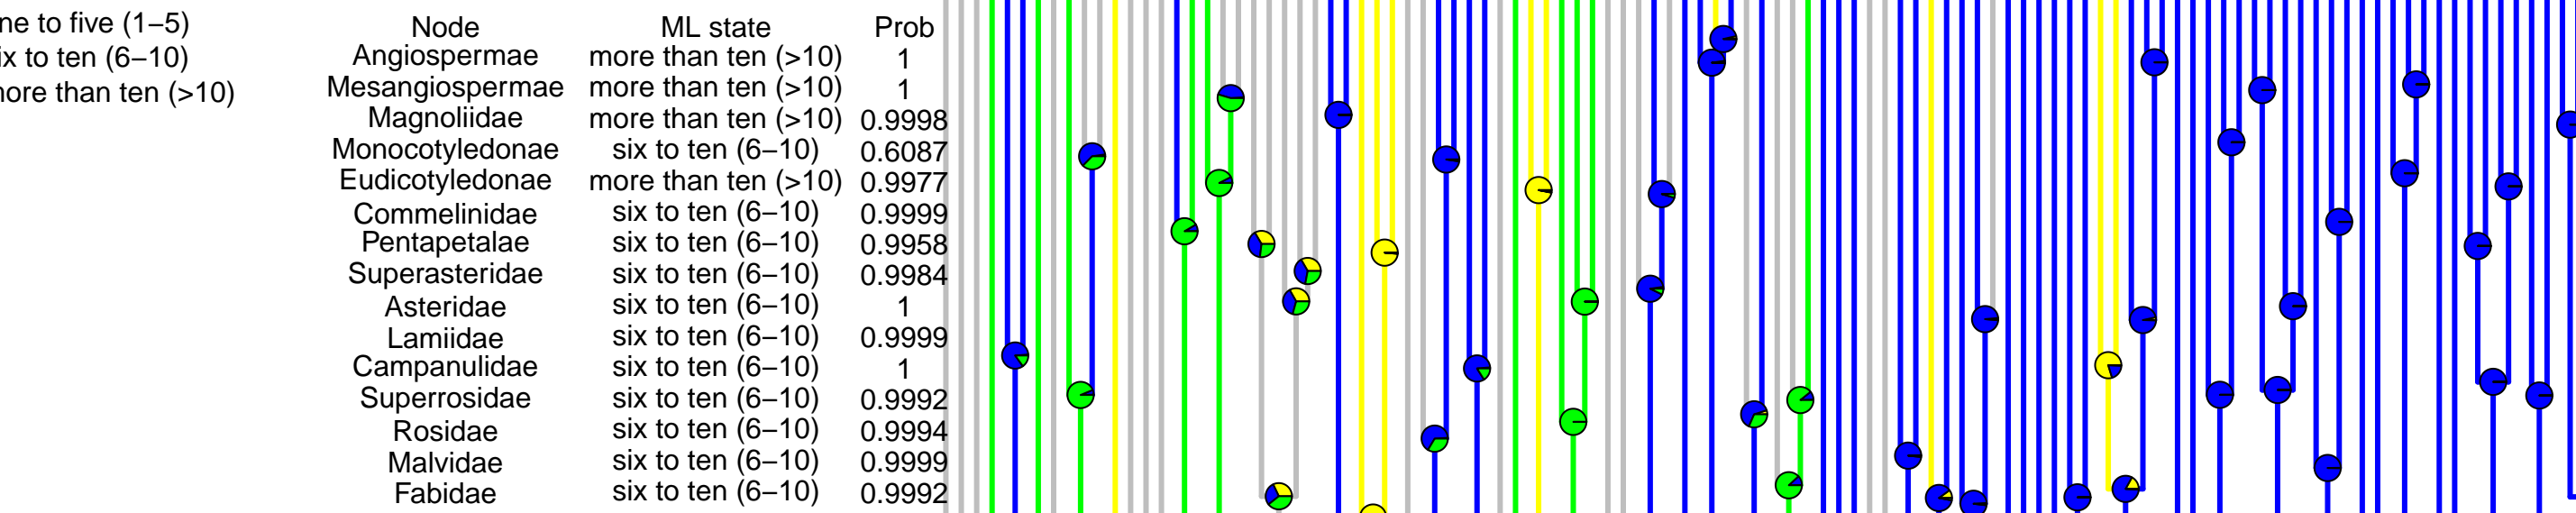

| Model    | LogL    | Npar | AIC    | AICc   | DeltaAICc | w    | q01    | ... |
|----------|---------|------|--------|--------|-----------|------|--------|-----|
| ARD      | -326.44 | 6    | 664.88 | 664.98 | 2.2       | 0.25 | 0.0038 | ... |
| ARDeq**  | -325.34 | 6    | 662.68 | 662.79 | 0         | 0.74 | 0.0038 | ... |
| ER       | -351.51 | 1    | 705.03 | 705.03 | 42.25     | 0    | 0.0013 | ... |
| SYM      | -340.6  | 3    | 687.2  | 687.23 | 24.44     | 0    | 0.002  | ... |
| SYMeq    | -339.52 | 3    | 685.05 | 685.08 | 22.29     | 0    | 0.002  | ... |
| ORD      | -332.72 | 4    | 673.44 | 673.49 | 10.7      | 0    | 0.0039 | ... |
| ORDeq    | -331.62 | 4    | 671.24 | 671.29 | 8.5       | 0.01 | 0.0039 | ... |
| ORDSYM   | -342.95 | 2    | 689.9  | 689.92 | 27.13     | 0    | 0.002  | ... |
| ORDSYMeq | -341.89 | 2    | 687.78 | 687.79 | 25        | 0    | 0.002  | ... |
| ORDER    | -352.31 | 1    | 706.62 | 706.62 | 43.83     | 0    | 0.0014 | ... |

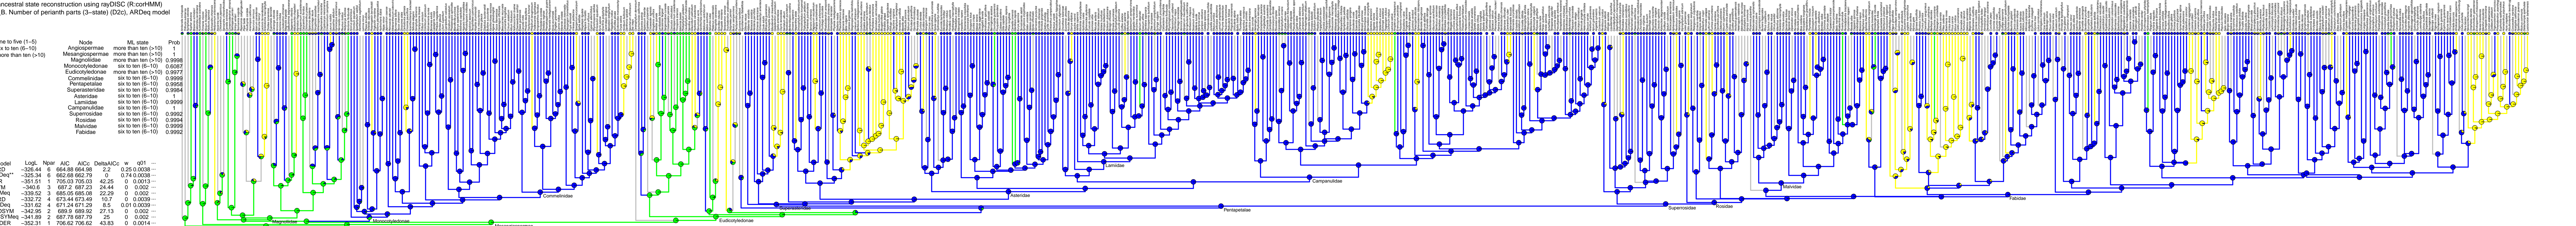

MP ancestral state reconstruction using ancestral.pars

(R:phangorn)

201\_C. Number of perianth parts (binary) (D2c), 69 steps

● one to six (1-6)  
● more than six (>6)

Node  
Angiospermae  
Mesangiospermae  
Magnoliidae  
Monocotyledonae  
Eudicotyledonae  
Commelinidae  
Pentastelidae  
Superasteridae  
Asteridae  
Lamiidae  
Campanulidae  
Superrosidae  
Rosidae  
Malvidae  
Fabidae

MP state(s)  
more than six (>6)  
one to six (1-6)  
one to six (1-6) / more than six (>6)  
one to six (1-6)  
one to six (1-6)  
more than six (>6)  
more than six (>6)

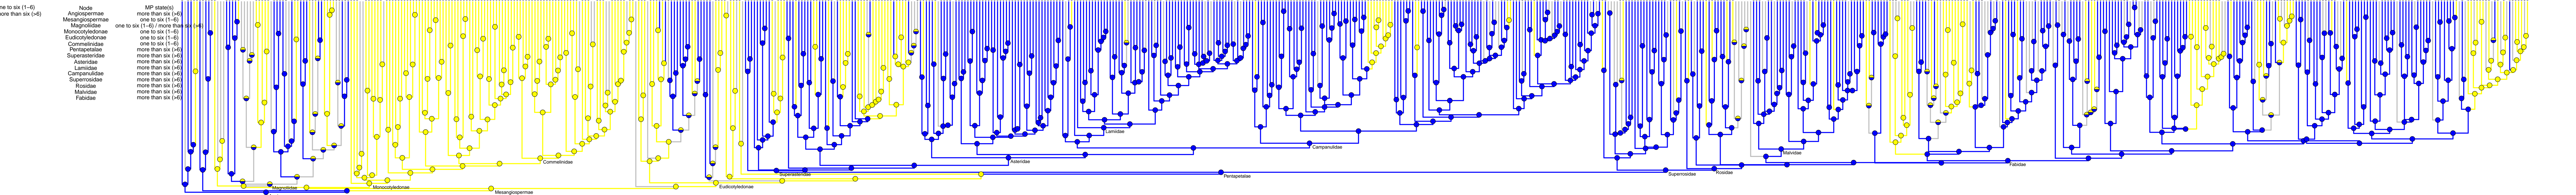

ML ancestral state reconstruction using rayDISC (R:corHMM)

201\_C. Number of perianth parts (binary) (D2c), ARDeq model

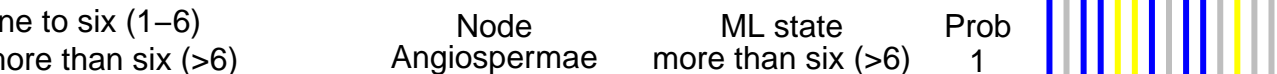

| Node            | ML state           | Prob   |
|-----------------|--------------------|--------|
| Angiospermae    | more than six (>6) | 1      |
| Mesangiospermae | more than six (>6) | 1      |
| Magnoliidae     | more than six (>6) | 0.9998 |
| Monocotyledonae | one to six (1–6)   | 0.813  |
| Eudicotyledonae | more than six (>6) | 1      |
| Commelinidae    | one to six (1–6)   | 1      |
| Pentapetalae    | more than six (>6) | 1      |
| Superasteridae  | more than six (>6) | 1      |
| Asteridae       | more than six (>6) | 1      |
| Lamiidae        | more than six (>6) | 1      |
| Campanulidae    | more than six (>6) | 1      |
| Superrosidae    | more than six (>6) | 1      |
| Rosidae         | more than six (>6) | 1      |
| Malvidae        | more than six (>6) | 1      |
| Fabidae         | more than six (>6) | 1      |

| Model   | LogL    | Npar | AIC    | AICc   | DeltaAICc | w    | q01    | q10    |
|---------|---------|------|--------|--------|-----------|------|--------|--------|
| ARD     | -248.5  | 2    | 501    | 501.02 | 1.39      | 0.33 | 6e-04  | 0.0026 |
| ARDeq** | -247.81 | 2    | 499.62 | 499.63 | 0         | 0.66 | 6e-04  | 0.0026 |
| ER      | -255.26 | 1    | 512.52 | 512.52 | 12.89     | 0    | 0.0021 | 0.0021 |
| UNI01   | -325.69 | 1    | 653.38 | 653.38 | 153.75    | 0    | 0.0082 |        |
| UNI10   | -253.14 | 1    | 508.28 | 508.28 | 8.65      | 0.01 | 0.0029 |        |

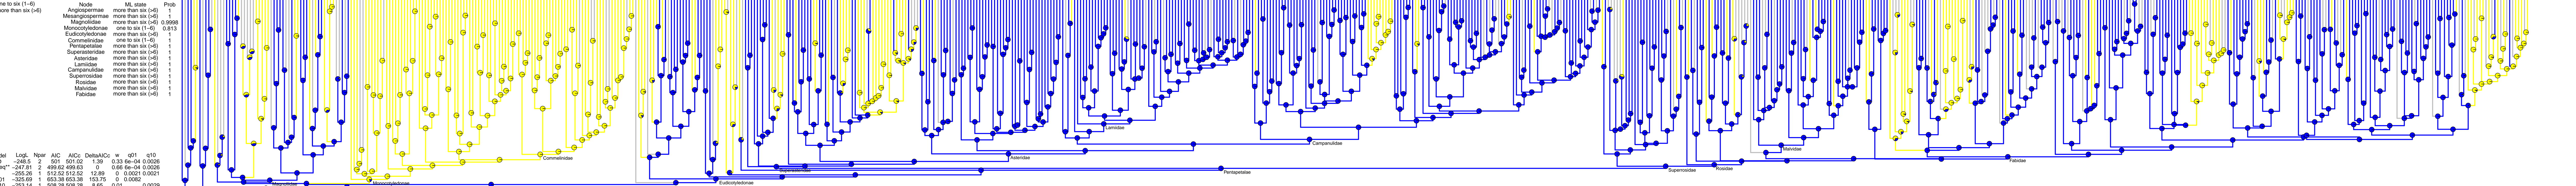

MP ancestral state reconstruction using ancestral.pars  
(R:phangorn)  
230\_A. Perianth phyllotaxy (binary) (D2d), 16 steps

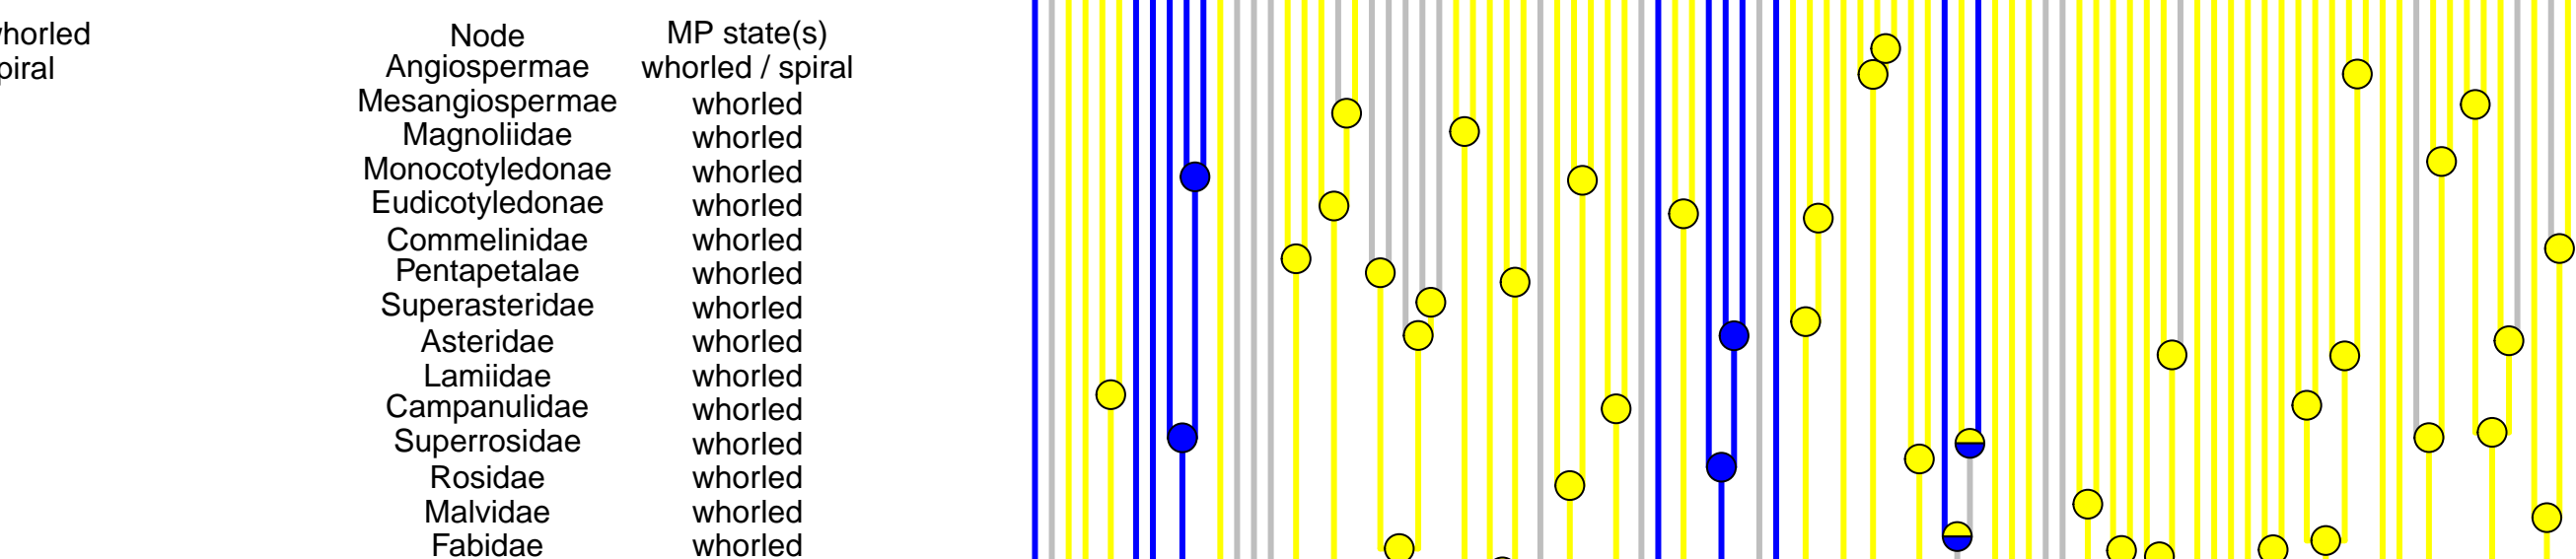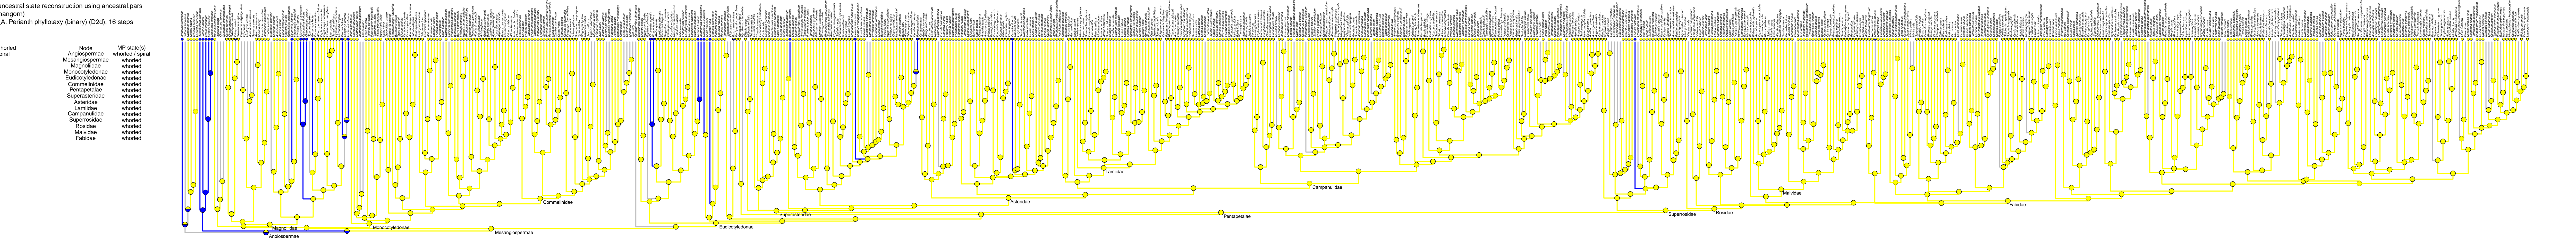

ML ancestral state reconstruction using rayDISC (R:corHMM)  
230\_A. Perianth phyllotaxy (binary) (D2d), UNI10 model

● whorled  
● spiral

| Node            | ML state | Prob   |
|-----------------|----------|--------|
| Angiospermae    | spiral   | 1      |
| Mesangiospermae | spiral   | 1      |
| Magnoliidae     | spiral   | 1      |
| Monocotyledonae | spiral   | 0.6562 |
| Eudicotyledonae | spiral   | 1      |
| Commelinidae    | whorled  | 0.9822 |
| Pentapetalae    | spiral   | 1      |
| Superasteridae  | spiral   | 1      |
| Asteridae       | spiral   | 1      |
| Lamiidae        | whorled  | 0.9696 |
| Campanulidae    | whorled  | 0.8816 |
| Superrosidae    | spiral   | 1      |
| Rosidae         | spiral   | 0.7194 |
| Malvidae        | whorled  | 0.9942 |
| Fabidae         | whorled  | 0.9945 |

| Model  | LogL   | Npar | AIC    | AICc   | DeltaAICc | w    | q01    | q10   |
|--------|--------|------|--------|--------|-----------|------|--------|-------|
| ARD    | -77.94 | 2    | 159.88 | 159.9  | 3.9       | 0.07 | 4e-04  | 5e-04 |
| ARDq   | -77.27 | 2    | 158.54 | 158.55 | 2.56      | 0.13 | 4e-04  | 2e-04 |
| ER     | -77.94 | 1    | 157.88 | 157.89 | 1.89      | 0.18 | 4e-04  | 4e-04 |
| UNI01  | -77.98 | 1    | 157.96 | 157.96 | 1.97      | 0.17 | 4e-04  |       |
| UNI10* | -76.99 | 1    | 155.99 | 155.99 | 0         | 0.46 | 0.0181 |       |

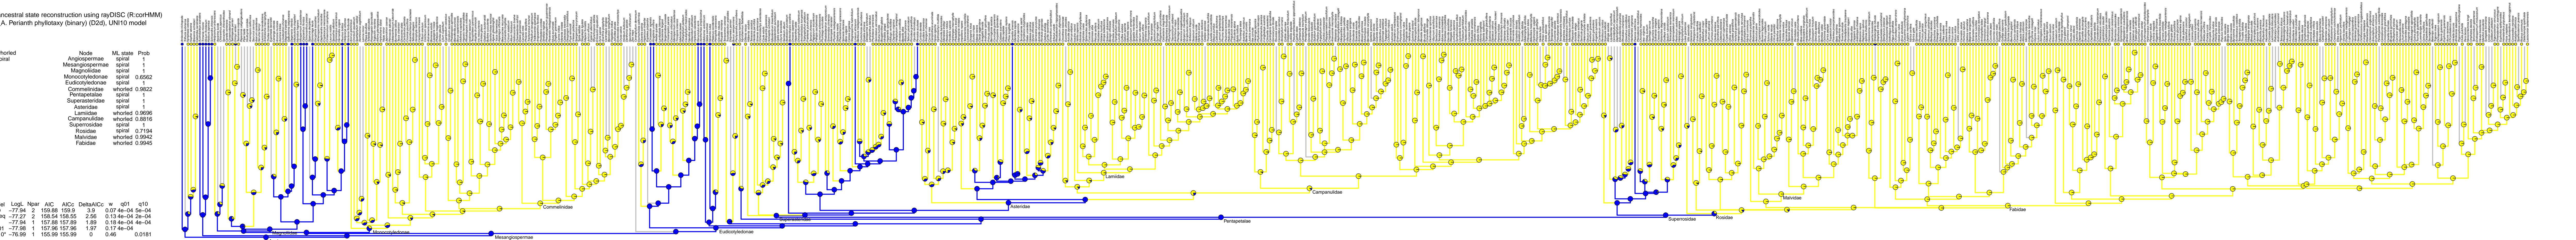

# MP ancestral state reconstruction using ancestral.pars

(R:phangorn)

231\_A. Number of perianth whorls (D2c), 73 steps

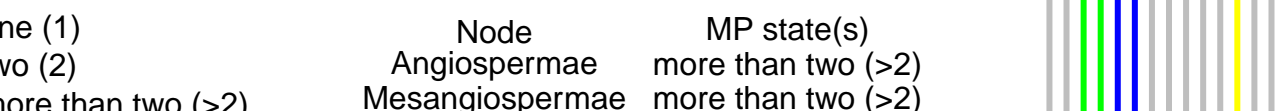

| Node            | MP state(s)        |
|-----------------|--------------------|
| Angiospermae    | more than two (>2) |
| Mesangiospermae | more than two (>2) |
| Magnoliidae     | more than two (>2) |
| Monocotyledonae | two (2)            |
| Eudicotyledonae | more than two (>2) |
| Commelinidae    | two (2)            |
| Pentapetalae    | two (2)            |
| Superasteridae  | two (2)            |
| Asteridae       | two (2)            |
| Lamiidae        | two (2)            |
| Campanulidae    | two (2)            |
| Superrosidae    | two (2)            |
| Rosidae         | two (2)            |
| Malvidae        | two (2)            |
| Fabidae         | two (2)            |

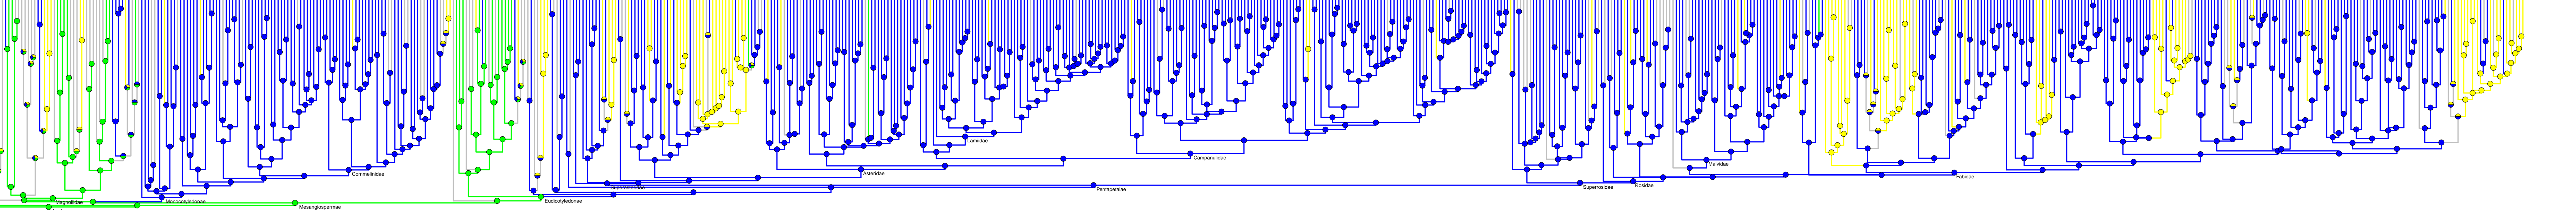

ML ancestral state reconstruction using rayDISC (R:corHMM)

231\_A. Number of perianth whorls (D2c), ARDeq model

- one (1)  
● two (2)  
● more than two (>2)

| Node            | ML state           | Prob   |
|-----------------|--------------------|--------|
| Angiospermae    | more than two (>2) | 1      |
| Mesangiospermae | more than two (>2) | 1      |
| Magnoliidae     | more than two (>2) | 1      |
| Monocotyledonae | two (2)            | 0.739  |
| Eudicotyledonae | more than two (>2) | 0.9976 |
| Commelinidae    | two (2)            | 1      |
| Pentapetalae    | two (2)            | 0.9998 |
| Superasteridae  | two (2)            | 0.9998 |
| Asteridae       | two (2)            | 0.9999 |
| Lamiidae        | two (2)            | 0.9999 |
| Campanulidae    | two (2)            | 1      |
| Superrosidae    | two (2)            | 1      |
| Rosidae         | two (2)            | 1      |
| Malvidae        | two (2)            | 0.9999 |
| Fabidae         | two (2)            | 0.9978 |

| Model    | LogL    | Npar | AIC    | AICc   | DeltaAICc | w    | q01    | ... |
|----------|---------|------|--------|--------|-----------|------|--------|-----|
| ARD      | -270.99 | 6    | 553.97 | 554.08 | 2.2       | 0.25 | 0.0046 | ... |
| ARDeq**  | -269.89 | 6    | 551.77 | 551.88 | 0         | 0.75 | 0.0046 | ... |
| ER       | -312.34 | 1    | 626.68 | 626.69 | 74.81     | 0    | 0.001  | ... |
| SYM      | -294.44 | 3    | 594.89 | 594.92 | 43.03     | 0    | 0.0018 | ... |
| SYMeq    | -293.48 | 3    | 592.95 | 592.98 | 41.1      | 0    | 0.0018 | ... |
| ORD      | -278.36 | 4    | 564.71 | 564.77 | 12.88     | 0    | 0.0044 | ... |
| ORDeq    | -277.26 | 4    | 562.52 | 562.57 | 10.69     | 0    | 0.0044 | ... |
| ORDSYM   | -299.97 | 2    | 603.94 | 603.96 | 52.08     | 0    | 0.0019 | ... |
| ORDSYMeq | -298.9  | 2    | 601.81 | 601.82 | 49.94     | 0    | 0.0019 | ... |
| ORDER    | -314.93 | 1    | 631.85 | 631.86 | 79.98     | 0    | 0.0012 | ... |

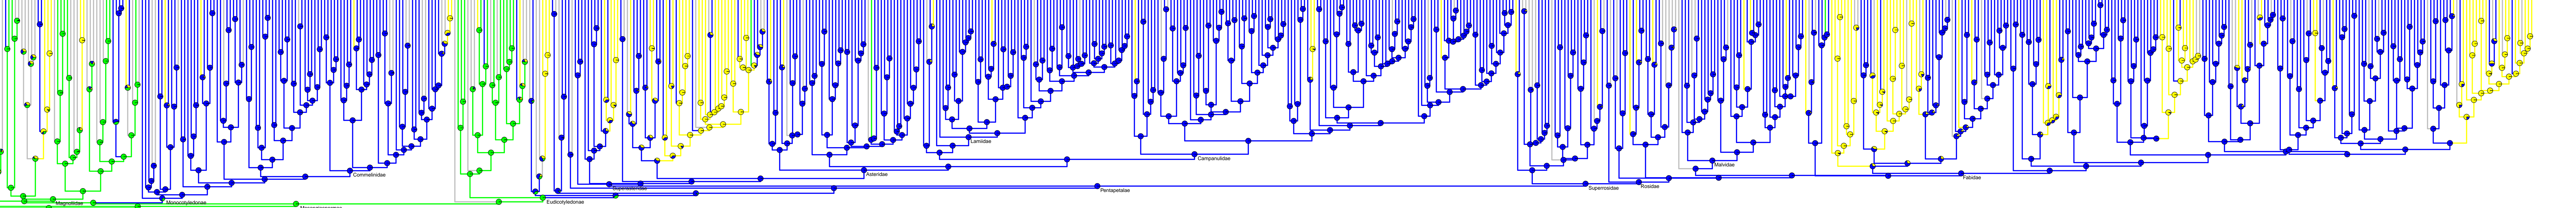



ML ancestral state reconstruction using rayDISC (R:corHMM)

232\_A\_Perianth merism (4-state) (D2c), SYMeq model

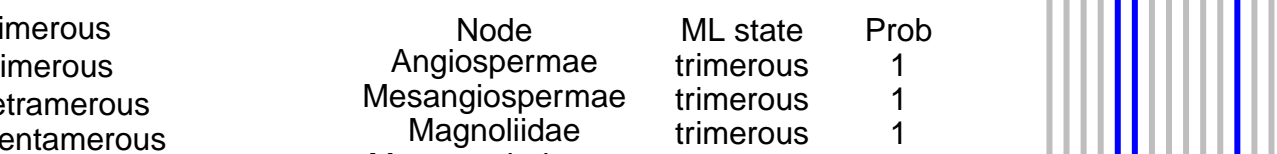

| Node            | ML state    | Prob   |
|-----------------|-------------|--------|
| Angiospermae    | trimerous   | 1      |
| Mesangiospermae | trimerous   | 1      |
| Magnoliidae     | trimerous   | 1      |
| Monocotyledonae | trimerous   | 1      |
| Eudicotyledonae | trimerous   | 0.9685 |
| Commelinidae    | trimerous   | 1      |
| Pentapetalae    | pentamerous | 0.9997 |
| Superasteridae  | pentamerous | 1      |
| Asteridae       | pentamerous | 1      |
| Lamiidae        | pentamerous | 1      |
| Campanulidae    | pentamerous | 1      |
| Superrosidae    | pentamerous | 1      |
| Rosidae         | pentamerous | 1      |
| Malvidae        | pentamerous | 1      |
| Fabidae         | pentamerous | 1      |

| Model   | LogL    | Npar | AIC    | AICc   | DeltaAICc | w    | q01    | ... |
|---------|---------|------|--------|--------|-----------|------|--------|-----|
| ARD     | -323.89 | 12   | 671.77 | 672.17 | 11.22     | 0    | 0      | ... |
| ARDeq   | -322.55 | 12   | 669.09 | 669.49 | 8.54      | 0.01 | 0      | ... |
| ER      | -360.43 | 1    | 722.86 | 722.86 | 61.91     | 0    | 8e-04  | ... |
| SYM     | -325.81 | 6    | 663.61 | 663.72 | 2.76      | 0.2  | 0.0013 | ... |
| SYMeq** | -324.42 | 6    | 660.85 | 660.96 | 0         | 0.79 | 0.0013 | ... |
| ORD     | -336.79 | 6    | 685.59 | 685.7  | 24.74     | 0    | 0      | ... |
| ARDeq   | -335.83 | 6    | 683.65 | 683.76 | 22.8      | 0    | 0      | ... |
| ORDSYM  | -344.4  | 3    | 694.8  | 694.83 | 33.87     | 0    | 0.002  | ... |
| ORDSYMq | -343.03 | 3    | 692.05 | 692.08 | 31.12     | 0    | 0.002  | ... |
| ORDER   | -345.99 | 1    | 693.97 | 693.98 | 33.02     | 0    | 0.0025 | ... |

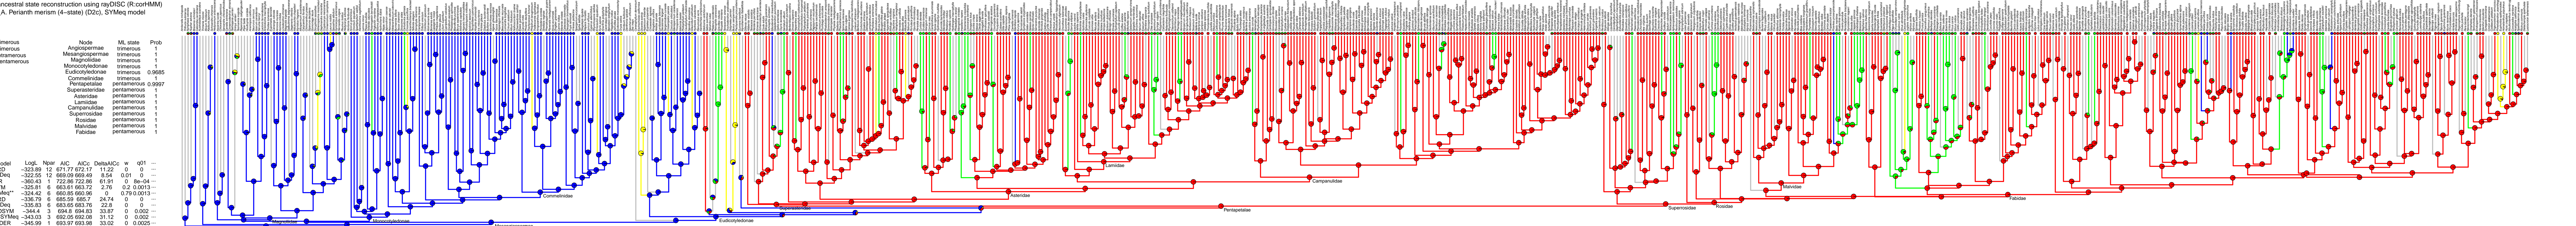

MP ancestral state reconstruction using ancestral.pars  
(R:phangorn)  
232\_B. Perianth merism (3-state) (D2c), 70 steps

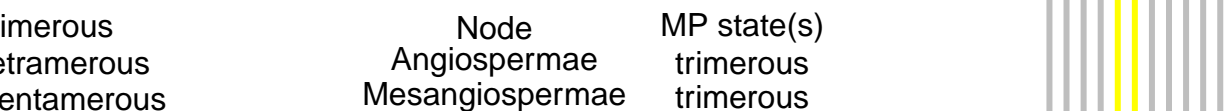

Node  
Angiospermae  
Mesangiospermae  
Magnoliidae  
Monocotyledonae  
Eudicotyledonae  
Commelinidae  
Pentapetalae  
Superasteridae  
Asteridae  
Lamiidae  
Campanulidae  
Superrosidae  
Rosidae  
Malvidae  
Fabidae

MP state(s)  
trimereous  
trimereous  
trimereous  
trimereous  
trimereous  
trimereous  
pentamereous  
pentamereous  
pentamereous  
pentamereous  
pentamereous  
pentamereous  
pentamereous  
pentamereous  
pentamereous  
pentamereous

Angiospermae

Magnoliidae

Monocotyledonae

Mesangiospermae

Eudicotyledonae

Superasteridae

Asteridae

Campanulidae

Superrosidae

Rosidae

Malvidae

Fabidae

Pentapetalae

Commelinidae

Lamiidae

Campanulidae

Superasteridae

Asteridae

Campanulidae

Superrosidae

Rosidae

Malvidae

Fabidae

Pentapetalae

Commelinidae

Lamiidae

Campanulidae

Superasteridae

Asteridae

Campanulidae

Superrosidae

Rosidae

Malvidae

Fabidae

Pentapetalae

Commelinidae

Lamiidae

Campanulidae

Superasteridae

Asteridae

Campanulidae

Superrosidae

Rosidae

Malvidae

Fabidae

Pentapetalae

Commelinidae

Lamiidae

Campanulidae

Superasteridae

Asteridae

Campanulidae

Superrosidae

Rosidae

Malvidae

Fabidae

Pentapetalae

Commelinidae

Lamiidae

Campanulidae

Superasteridae

Asteridae

Campanulidae

Superrosidae

Rosidae

Malvidae

Fabidae

Pentapetalae

Commelinidae

Lamiidae

Campanulidae

Superasteridae

Asteridae

Campanulidae

Superrosidae

Rosidae

Malvidae

Fabidae

Pentapetalae

Commelinidae

Lamiidae

Campanulidae

Superasteridae

Asteridae

Campanulidae

Superrosidae

Rosidae

Malvidae

Fabidae

Pentapetalae

Commelinidae

Lamiidae

Campanulidae

Superasteridae

Asteridae

Campanulidae

Superrosidae

Rosidae

Malvidae

Fabidae

Pentapetalae

Commelinidae

Lamiidae

Campanulidae

Superasteridae

Asteridae

Campanulidae

Superrosidae

Rosidae

Malvidae

Fabidae

Pentapetalae

Commelinidae

Lamiidae

Campanulidae

Superasteridae

Asteridae

Campanulidae

Superrosidae

Rosidae

Malvidae

Fabidae

Pentapetalae

Commelinidae

Lamiidae

Campanulidae

Superasteridae

Asteridae

Campanulidae

Superrosidae

Rosidae

Malvidae

Fabidae

Pentapetalae

Commelinidae

Lamiidae

Campanulidae

Superasteridae

Asteridae

Campanulidae

Superrosidae

Rosidae

Malvidae

Fabidae

Pentapetalae

Commelinidae

Lamiidae

Campanulidae

Superasteridae

Asteridae

Campanulidae

Superrosidae

Rosidae

Malvidae

Fabidae

Pentapetalae

Commelinidae

Lamiidae

Campanulidae

Superasteridae

Asteridae

Campanulidae

Superrosidae

Rosidae

Malvidae

Fabidae

Pentapetalae

Commelinidae

Lamiidae

Campanulidae

Superasteridae

Asteridae

Campanulidae

Superrosidae

Rosidae

Malvidae

Fabidae

Pentapetalae

Commelinidae

Lamiidae

Campanulidae

Superasteridae

Asteridae

Campanulidae

Superrosidae

Rosidae

Malvidae

Fabidae

Pentapetalae

Commelinidae

Lamiidae

Campanulidae

Superasteridae

Asteridae

Campanulidae

Superrosidae

Rosidae

Malvidae

Fabidae







MP ancestral state reconstruction using ancestral.pars

(R:phangorn)  
204\_A. Fusion of perianth (D2c): 78 steps

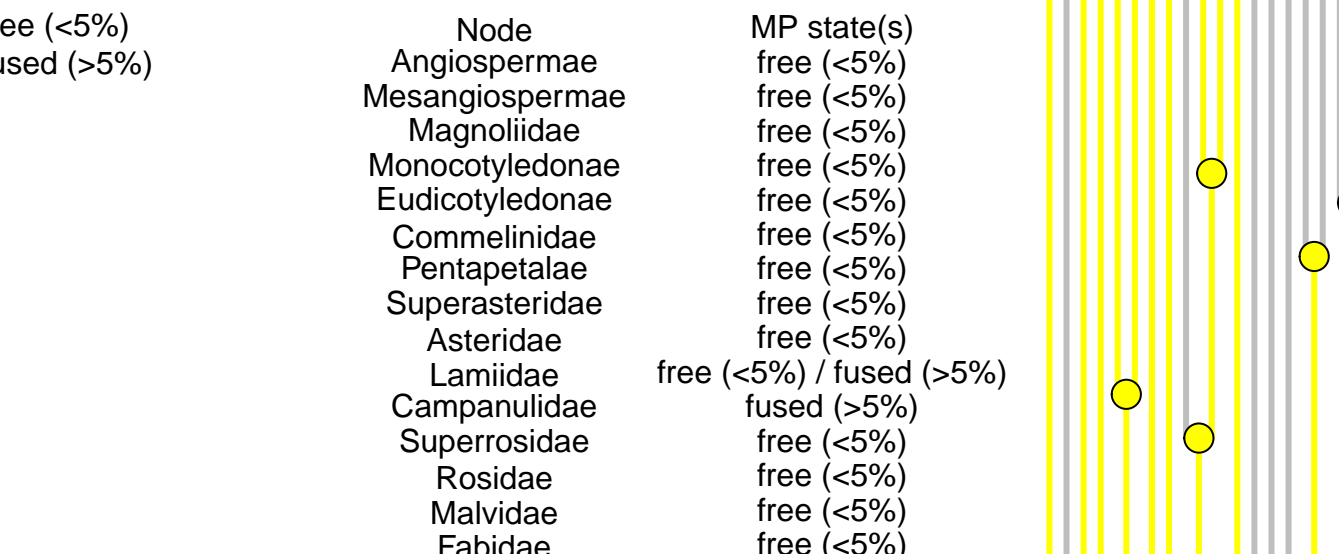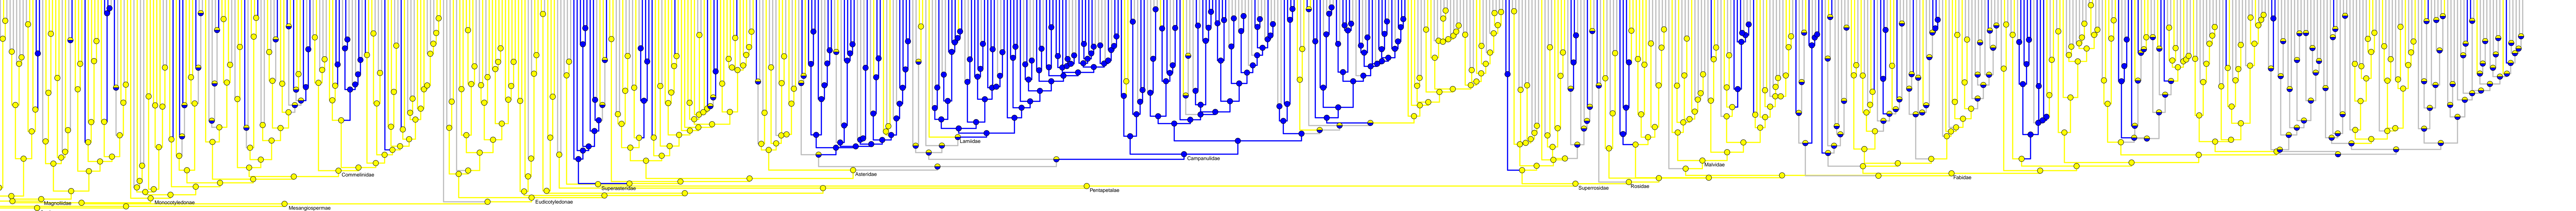



ancestral state reconstruction using ancestral.pars  
(phangorn)

A. Symmetry of perianth (binary) (D2d), 56 steps

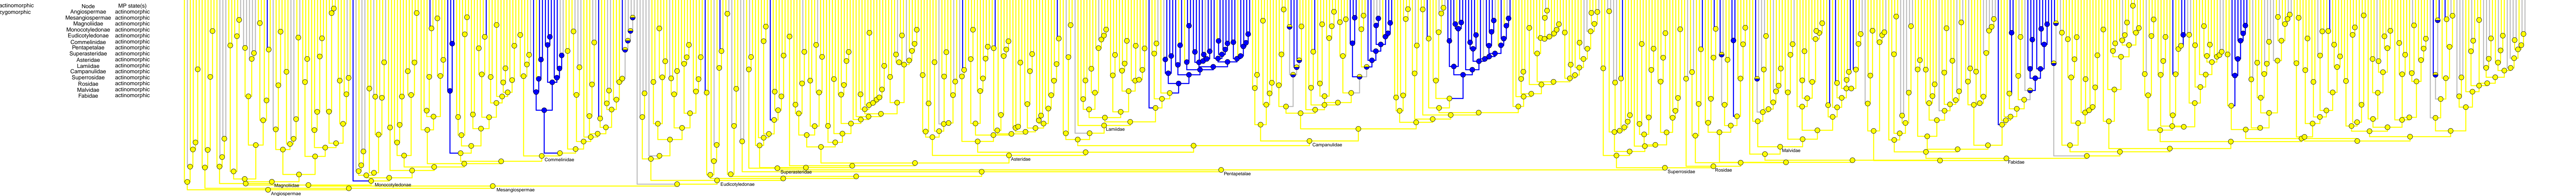

ML ancestral state reconstruction using rayDISC (R:corHMM)  
 207\_A. Symmetry of perianth (binary) (D2d), ARDeq model

● actinomorphic  
 ● zygomorphic

| Model   | LogL    | Npar | AIC    | AICc   | DeltaAICc | w    | q01    | q10    |
|---------|---------|------|--------|--------|-----------|------|--------|--------|
| ARD     | -210.77 | 2    | 425.53 | 425.55 | 1.38      | 0.33 | 0.0014 | 0.0062 |
| ARDeq** | -210.08 | 2    | 424.15 | 424.17 | 0         | 0.67 | 0.0014 | 0.0062 |
| ER      | -219.85 | 1    | 441.71 | 441.71 | 17.55     | 0    | 0.0015 | 0.0015 |
| UNI01   | -267.95 | 1    | 537.91 | 537.91 | 113.75    | 0    | 0.0019 |        |
| UNI10   | -217.33 | 1    | 436.66 | 436.67 | 12.5      | 0    |        | 0.0167 |

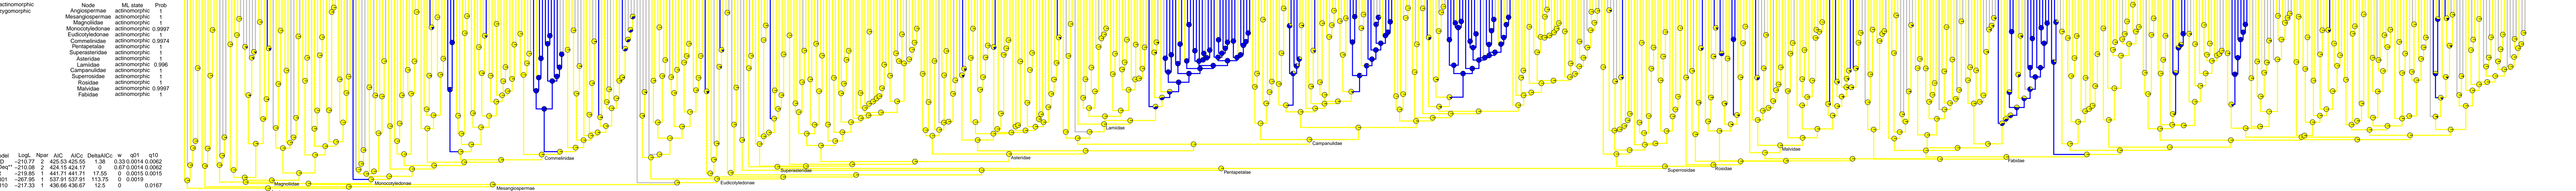

MP ancestral state reconstruction using ancestral.pars

(R:phangorn)  
301\_B. Number of fertile stamens (3-state) (D2c), 156 steps

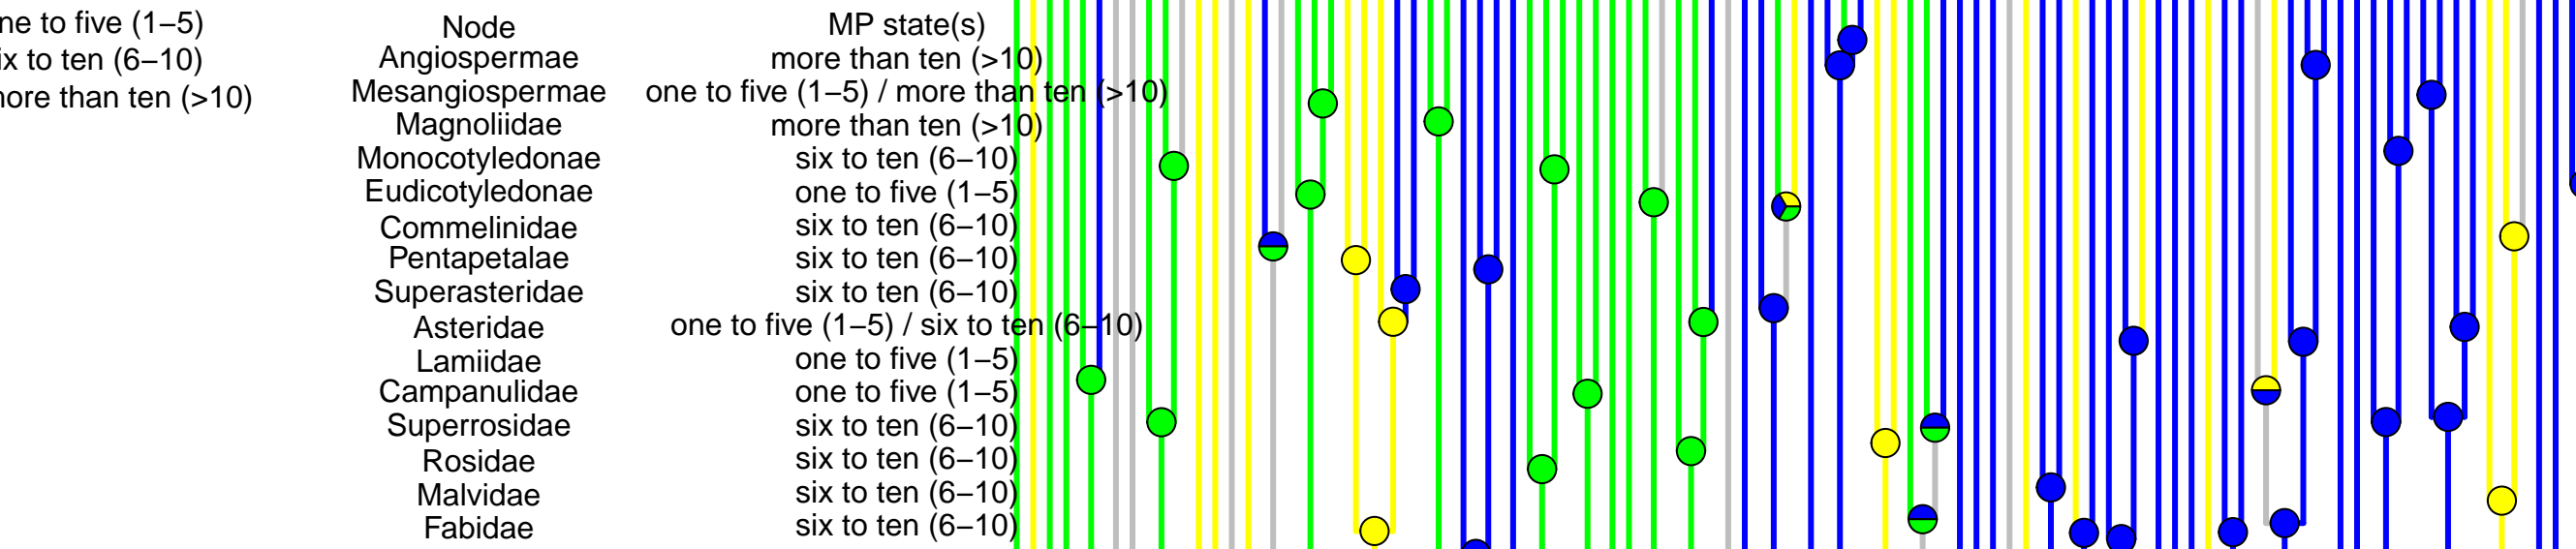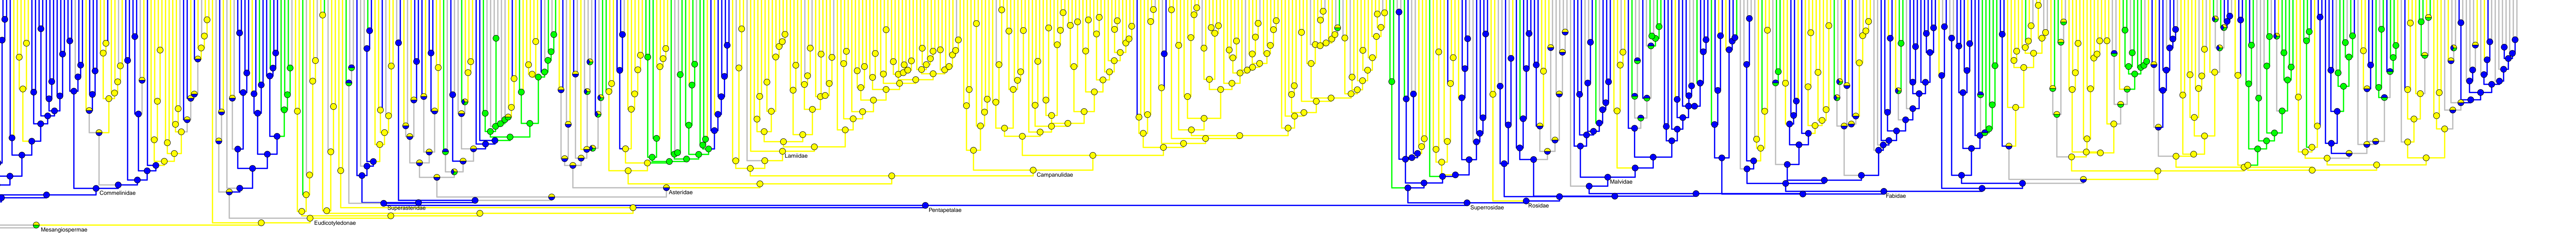

# ML ancestral state reconstruction using rayDISC (R:corHMM)

301\_B. Number of fertile stamens (3-state) (D2c), ARDeq model

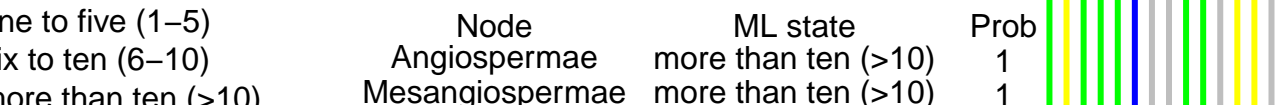

| Node            | ML state            | Prob   |
|-----------------|---------------------|--------|
| Angiospermae    | more than ten (>10) | 1      |
| Mesangiospermae | more than ten (>10) | 1      |
| Magnoliidae     | more than ten (>10) | 0.9999 |
| Monocotyledonae | six to ten (6-10)   | 0.58   |
| Eudicotyledonae | more than ten (>10) | 1      |
| Commelinidae    | six to ten (6-10)   | 0.9997 |
| Pentapetalae    | more than ten (>10) | 1      |
| Superasteridae  | more than ten (>10) | 1      |
| Asteridae       | more than ten (>10) | 0.9993 |
| Lamiidae        | one to five (1-5)   | 0.9995 |
| Campanulidae    | one to five (1-5)   | 0.9968 |
| Superrosidae    | more than ten (>10) | 1      |
| Rosidae         | more than ten (>10) | 0.9999 |
| Malvidae        | more than ten (>10) | 0.9154 |
| Fabidae         | more than ten (>10) | 1      |

| Model    | LogL    | Npar | AIC     | AICc    | DeltaAICc | w    | q01    | ... |
|----------|---------|------|---------|---------|-----------|------|--------|-----|
| ARD      | -491.73 | 6    | 995.45  | 995.56  | 2.2       | 0.25 | 4e-04  | ... |
| ARDeq**  | -490.63 | 6    | 993.25  | 993.36  | 0         | 0.75 | 4e-04  | ... |
| ER       | -536.12 | 1    | 1074.24 | 1074.25 | 80.89     | 0    | 0.0027 | ... |
| SYM      | -528.65 | 3    | 1063.3  | 1063.33 | 69.97     | 0    | 0.0038 | ... |
| SYMeq    | -527.8  | 3    | 1061.59 | 1061.62 | 68.26     | 0    | 0.0038 | ... |
| ORD      | -507.58 | 4    | 1023.16 | 1023.21 | 29.85     | 0    | 8e-04  | ... |
| ORDeq    | -507    | 4    | 1022    | 1022.05 | 28.69     | 0    | 8e-04  | ... |
| ORDSYM   | -531.31 | 2    | 1066.62 | 1066.64 | 73.27     | 0    | 0.0042 | ... |
| ORDSYMeq | -530.41 | 2    | 1064.81 | 1064.83 | 71.46     | 0    | 0.0042 | ... |
| ORDER    | -531.35 | 1    | 1064.71 | 1064.71 | 71.35     | 0    | 0.0043 | ... |

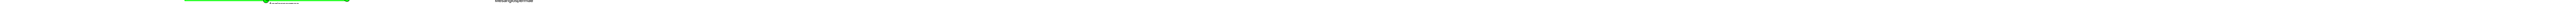

MP ancestral state reconstruction using ancestral.pars

(R:phangorn)

301\_C. Number of fertile stamens (binary) (D2c), 91 steps

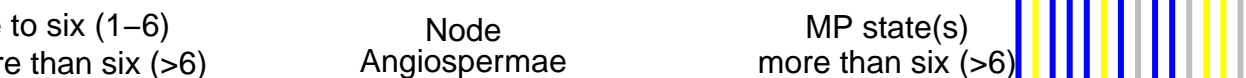

- Node
- Angiospermae
  - Mesangiospermae
  - Magnoliidae
  - Monocotyledonae
  - Eudicotyledonae
  - Commelinidae
  - Pentapetalae
  - Superasteridae
  - Asteridae
  - Lamiidae
  - Campanulidae
  - Superrosidae
  - Rosidae
  - Malvidae
  - Fabidae

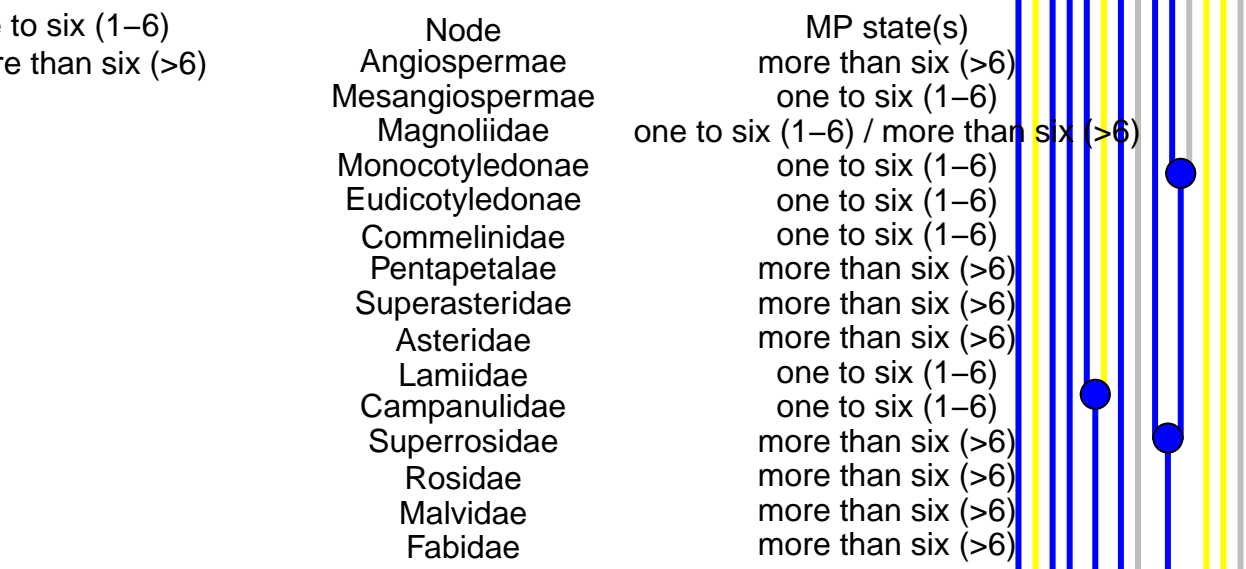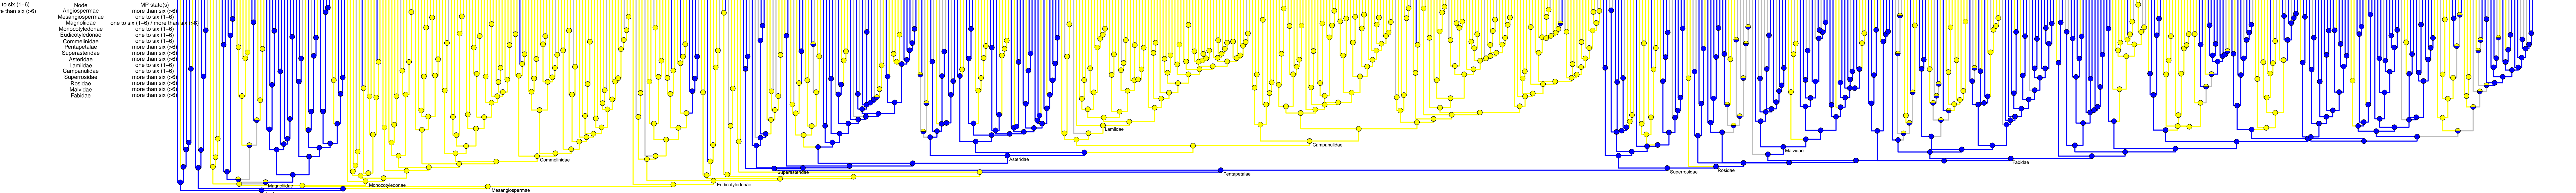



MP ancestral state reconstruction using ancestral.pars  
(R:phangorn)  
330\_A. Androecium structural phyllotaxy (binary) (D2d), 12 steps

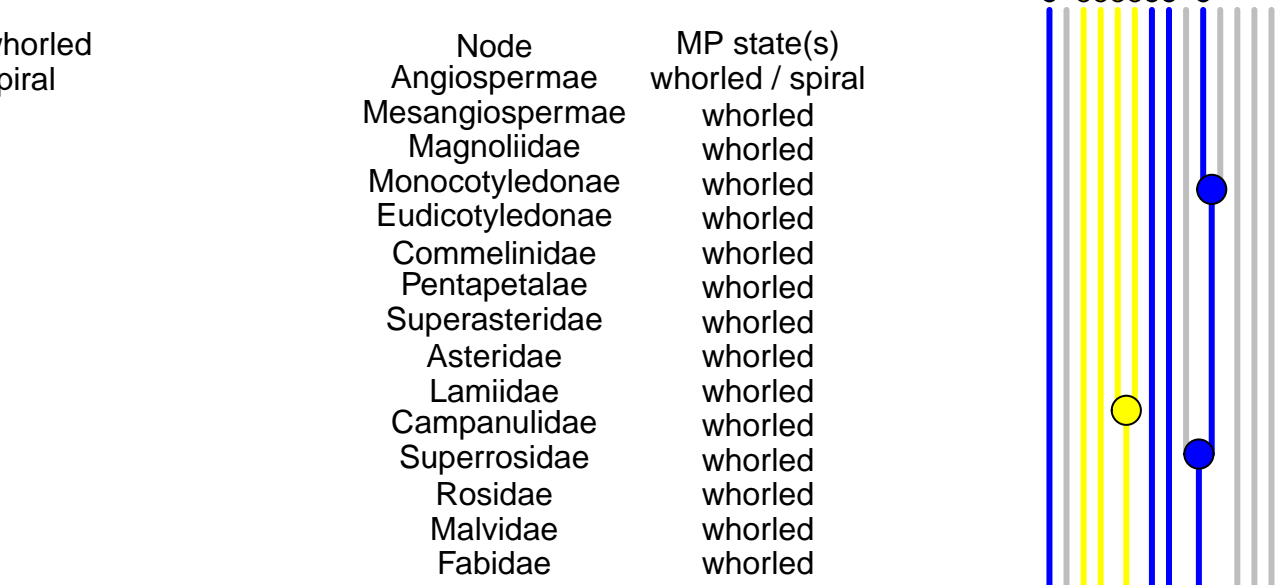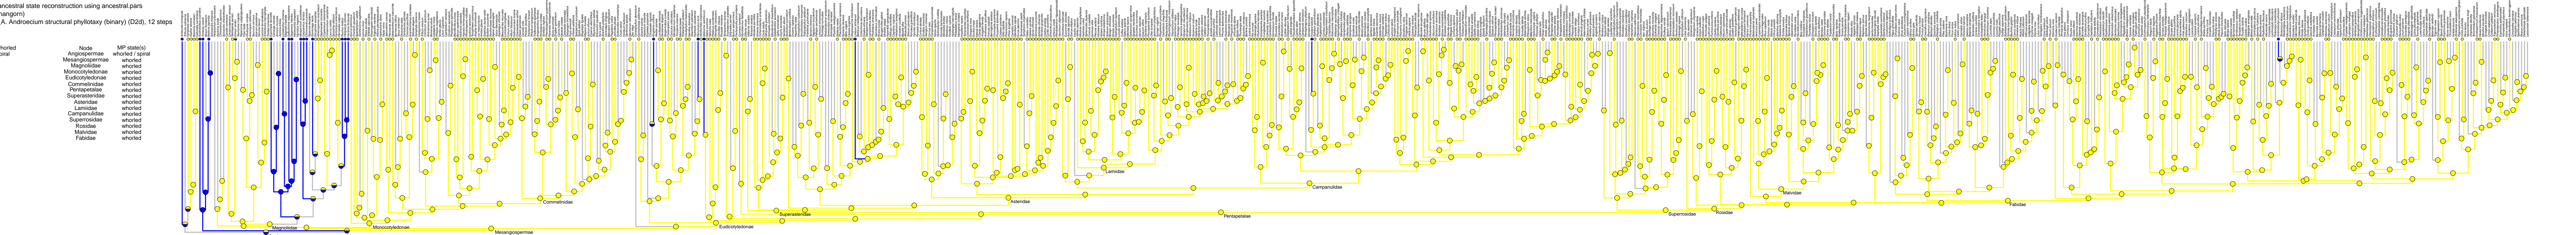

A. Androecium structural phylotaxy (binary) (D2d), ARDeg model

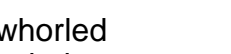[illegible]

| Model   | LogL   | Npar | AIC     | AICc       | DeltaAICc  | w    | q01   | q10    |
|---------|--------|------|---------|------------|------------|------|-------|--------|
| ARD     | -55.47 | 2    | 114.94  | 114.96     | 1.39       | 0.33 | 1e-04 | 0.0086 |
| ARDeq** | -54.78 | 2    | 113.55  | 113.57     | 0          | 0.66 | 1e-04 | 0.0086 |
| ER      | -60.92 | 1    | 123.84  | 123.85     | 10.28      | 0    | 4e-04 | 4e-04  |
| UNI01   | -60.72 | 1    | 123.45  | 123.45     | 9.88       | 0    | 4e-04 | 4e-04  |
| UNI10   | -1e+06 | 1    | 2000002 | 2000002.01 | 1999888.43 | 0    | 4e-04 | 4e-04  |

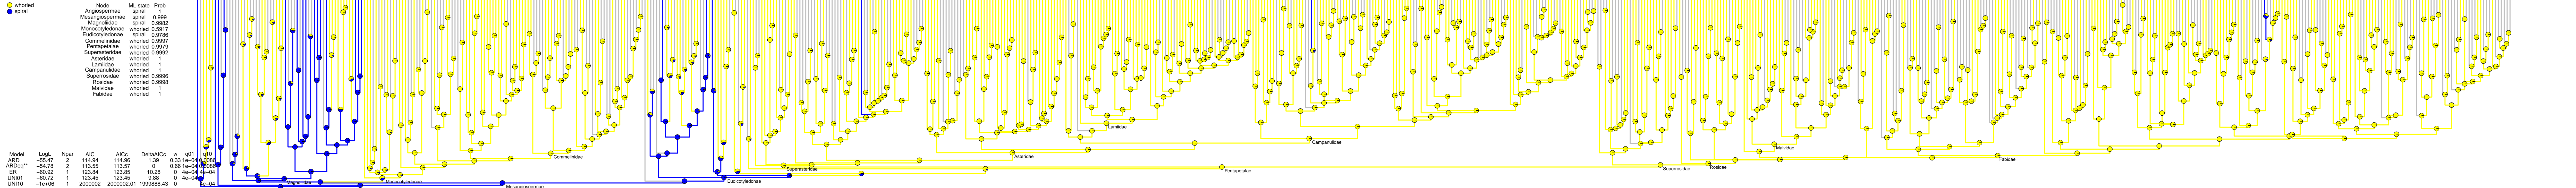

MP ancestral state reconstruction using ancestral.pars  
(R:phangorn)

331\_A. Number of androecium structural whorls (3-state) (D2c), 75 steps

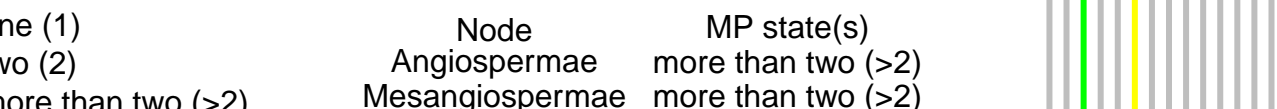

| Node            | MP state(s)        |
|-----------------|--------------------|
| Angiospermae    | more than two (>2) |
| Mesangiospermae | more than two (>2) |
| Magnoliidae     | more than two (>2) |
| Monocotyledonae | two (2)            |
| Eudicotyledonae | more than two (>2) |
| Commelinidae    | two (2)            |
| Pentapetalae    | one (1)            |
| Superasteridae  | one (1)            |
| Asteridae       | one (1)            |
| Lamiidae        | one (1)            |
| Campanulidae    | one (1)            |
| Superrosidae    | one (1)            |
| Rosidae         | one (1)            |
| Malvidae        | one (1) / two (2)  |
| Fabidae         | one (1)            |

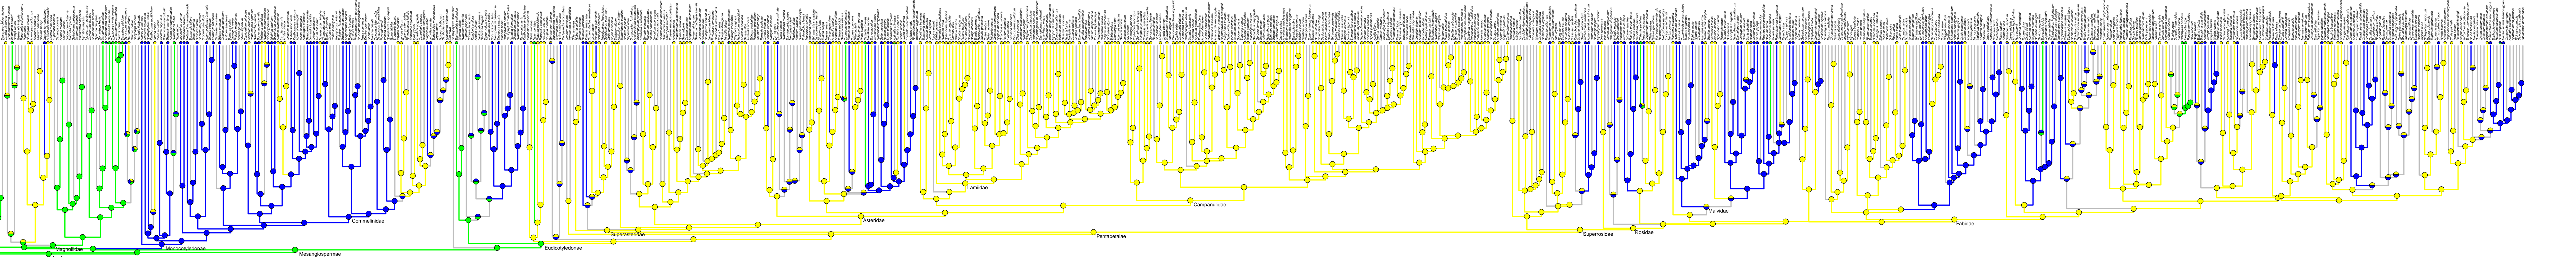

A Number of androecium structural whorls (3-state) (D2c) ABD number

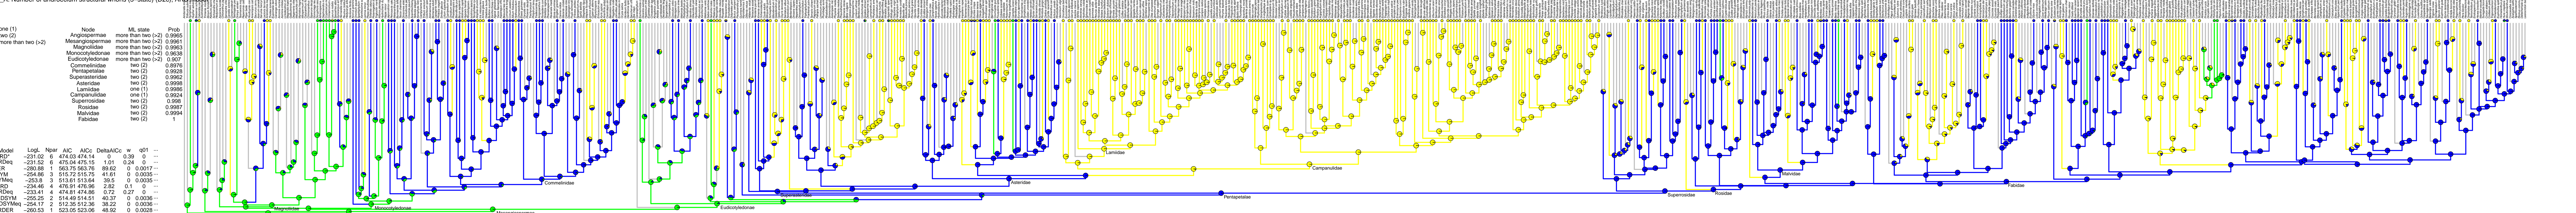

MP ancestral state reconstruction using ancestral.pars  
(R:phangorn)

332\_A. Androecium structural merism (4-state) (D2c), 56 steps

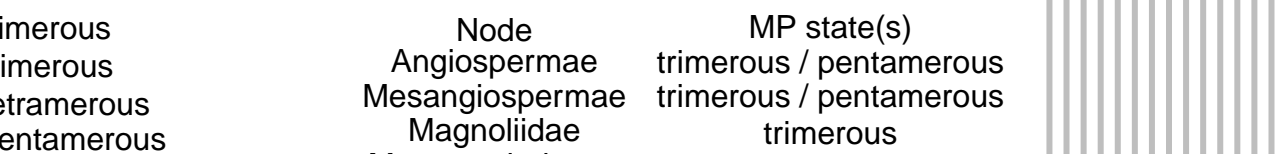

- Node
- Angiospermae
  - Mesangiospermae
  - Magnoliidae
  - Monocotyledonae
  - Eudicotyledonae
  - Commelinidae
  - Pentapetalae
  - Superasteridae
  - Asteridae
  - Lamiidae
  - Campanulidae
  - Superrosidae
  - Rosidae
  - Malvidae
  - Fabidae

- MP state(s)
- trimerous / pentamerous
  - trimerous / pentamerous
  - trimerous
  - trimerous / pentamerous
  - trimerous
  - pentamerous
  - pentamerous
  - pentamerous
  - pentamerous
  - pentamerous
  - pentamerous
  - pentamerous

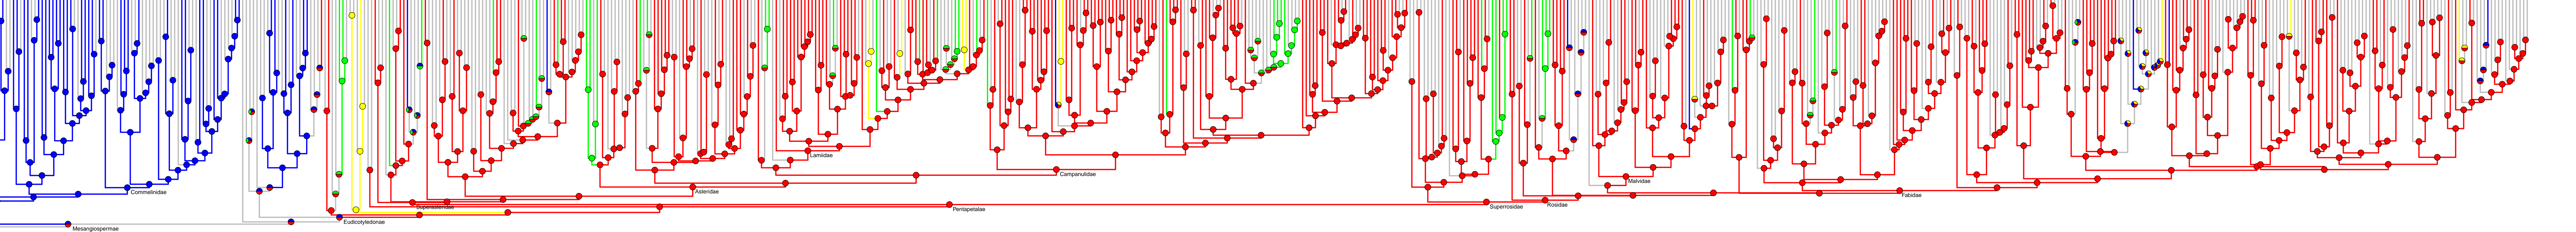

ML ancestral state reconstruction using rayDISC (R:corHMM)

332\_A. Androecium structural merism (4-state) (D2c), SYMeq model

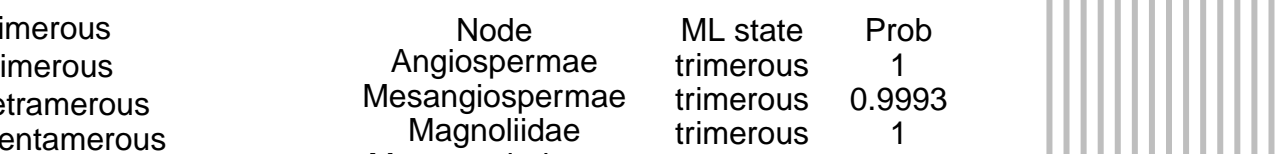

| Node            | ML state    | Prob   |
|-----------------|-------------|--------|
| Angiospermae    | trimerous   | 1      |
| Mesangiospermae | trimerous   | 0.9993 |
| Magnoliidae     | trimerous   | 1      |
| Monocotyledonae | trimerous   | 0.8545 |
| Eudicotyledonae | trimerous   | 1      |
| Commelinidae    | trimerous   | 1      |
| Pentapetalae    | pentamerous | 1      |
| Superasteridae  | pentamerous | 1      |
| Asteridae       | pentamerous | 0.9996 |
| Lamiidae        | pentamerous | 1      |
| Campanulidae    | pentamerous | 1      |
| Superrosidae    | pentamerous | 1      |
| Rosidae         | pentamerous | 1      |
| Malvidae        | pentamerous | 1      |
| Fabidae         | pentamerous | 1      |

| Model    | LogL    | Npar | AIC    | AICc   | DeltaAICc | w    | q01    | ... |
|----------|---------|------|--------|--------|-----------|------|--------|-----|
| ARD      | -223.12 | 12   | 470.25 | 470.65 | 10.88     | 0    | 0.0072 | ... |
| ARDeq    | -221.81 | 12   | 467.61 | 468.01 | 8.25      | 0.01 | 0.0071 | ... |
| ER       | -237.53 | 1    | 477.06 | 477.06 | 17.3      | 0    | 9e-04  | ... |
| SYM      | -225.16 | 6    | 462.31 | 462.42 | 2.65      | 0.21 | 6e-04  | ... |
| SYMeq**  | -223.83 | 6    | 459.66 | 459.77 | 0         | 0.78 | 6e-04  | ... |
| ORD      | -237.28 | 6    | 486.56 | 486.67 | 26.9      | 0    | 100    | ... |
| ORDeq    | -235.92 | 6    | 483.84 | 483.94 | 24.18     | 0    | 100    | ... |
| ORDSYM   | -259.11 | 3    | 524.22 | 524.25 | 64.49     | 0    | 0.0021 | ... |
| ORDSYMeq | -257.87 | 3    | 521.75 | 521.78 | 62.01     | 0    | 0.0021 | ... |
| ORDER    | -259.98 | 1    | 521.96 | 521.96 | 62.2      | 0    | 0.0031 | ... |

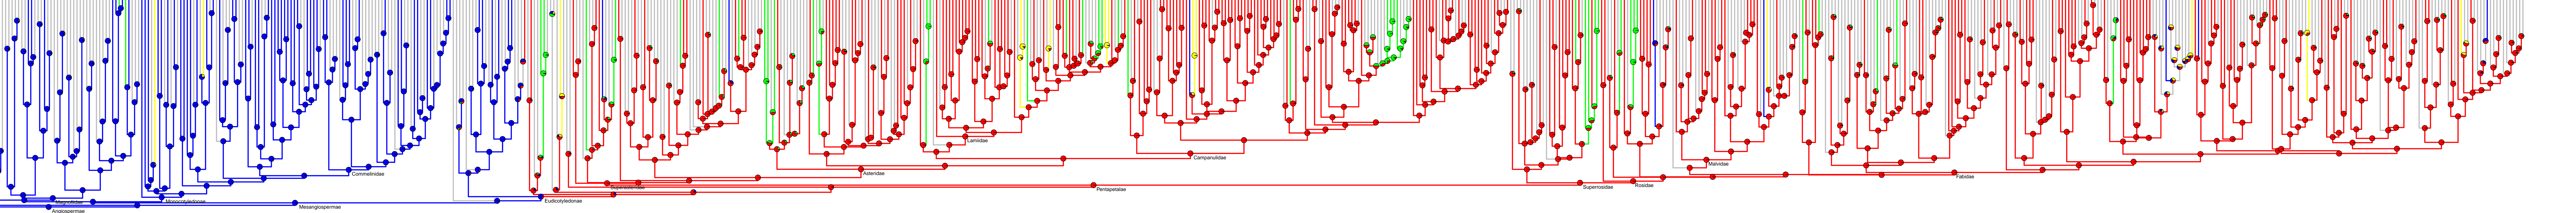

[illegible]

Phandorn)

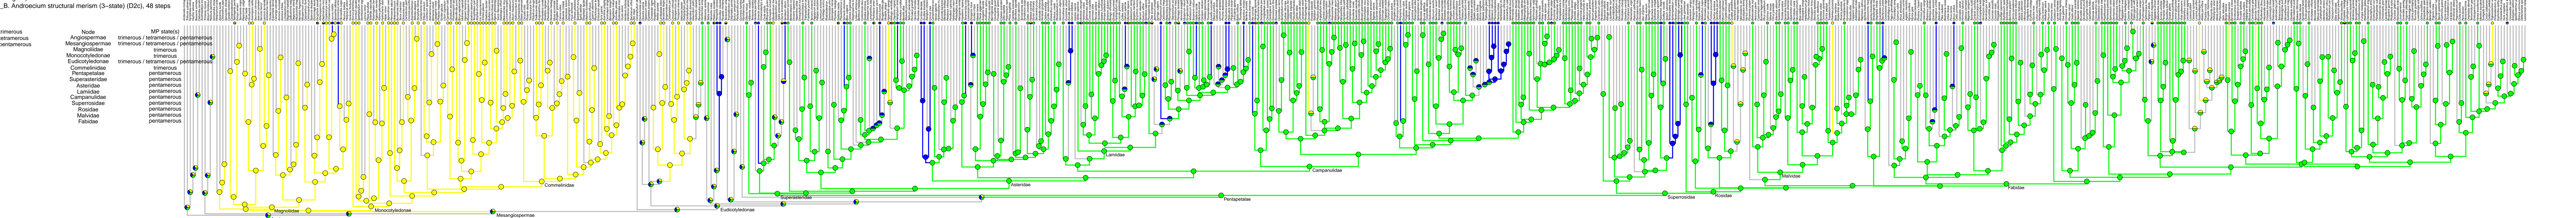

# ML ancestral state reconstruction using rayDISC (R:corHMM)

## 332\_B. Androecium structural merism (3-state) (D2c), SYMeq model

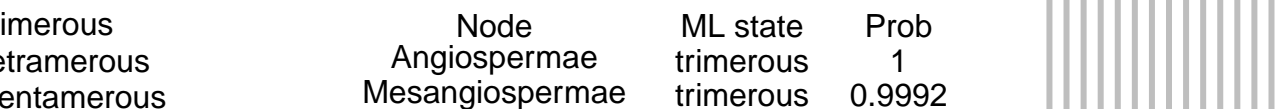

| Node            | ML state    | Prob   |
|-----------------|-------------|--------|
| Angiospermae    | trimerous   | 1      |
| Mesangiospermae | trimerous   | 0.9992 |
| Magnoliidae     | trimerous   | 1      |
| Monocotyledonae | trimerous   | 1      |
| Eudicotyledonae | trimerous   | 0.8461 |
| Commelinidae    | trimerous   | 1      |
| Pentapetalae    | pentamerous | 0.9999 |
| Superasteridae  | pentamerous | 1      |
| Asteridae       | pentamerous | 0.9996 |
| Lamiidae        | pentamerous | 0.9999 |
| Campanulidae    | pentamerous | 1      |
| Superrosidae    | pentamerous | 1      |
| Rosidae         | pentamerous | 1      |
| Malvidae        | pentamerous | 1      |
| Fabidae         | pentamerous | 1      |

| Model    | LogL    | Npar | AIC    | AICc   | DeltaAICc | w    | q01    | ... |
|----------|---------|------|--------|--------|-----------|------|--------|-----|
| ARD      | -177.13 | 6    | 366.27 | 366.37 | 7.81      | 0.01 | 5e-04  | ... |
| ARDeq    | -176.12 | 6    | 364.25 | 364.36 | 5.79      | 0.04 | 5e-04  | ... |
| ER       | -186.29 | 1    | 374.58 | 374.58 | 16.02     | 0    | 0.0011 | ... |
| SYM      | -177.31 | 3    | 360.62 | 360.65 | 2.08      | 0.22 | 5e-04  | ... |
| SYMeq**  | -176.27 | 3    | 358.54 | 358.57 | 0         | 0.64 | 5e-04  | ... |
| ORD      | -178.44 | 4    | 364.88 | 364.93 | 6.36      | 0.03 | 5e-04  | ... |
| ORDeq    | -177.56 | 4    | 363.12 | 363.17 | 4.6       | 0.06 | 3e-04  | ... |
| ORDSYM   | -186.2  | 2    | 376.4  | 376.42 | 17.85     | 0    | 0.002  | ... |
| ORDSYMeq | -185.23 | 2    | 374.45 | 374.47 | 15.9      | 0    | 0.002  | ... |
| ORDER    | -186.98 | 1    | 375.96 | 375.97 | 17.4      | 0    | 0.0027 | ... |

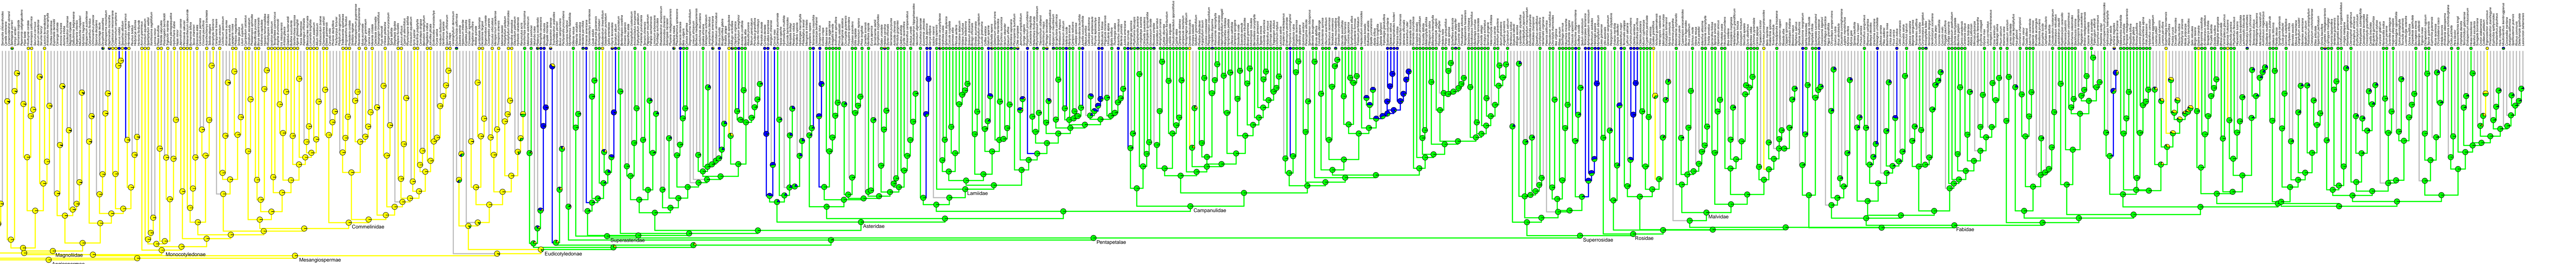

ancestral state reconstruction using ancestral.pars  
(phangorn)

\_A. Filament (binary) (D2d), 53 steps

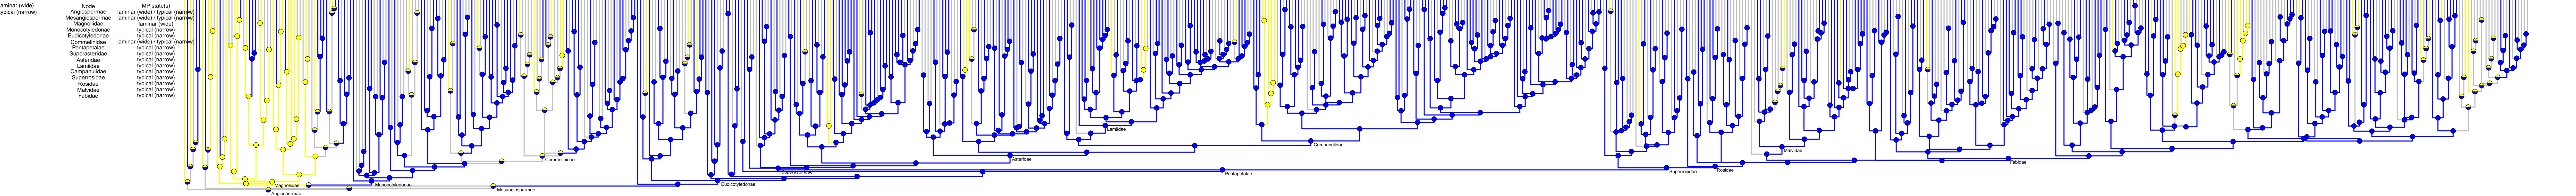



ancestral state reconstruction using ancestral.pars  
(phangorn)

A. Anther orientation (D2d), 110 steps

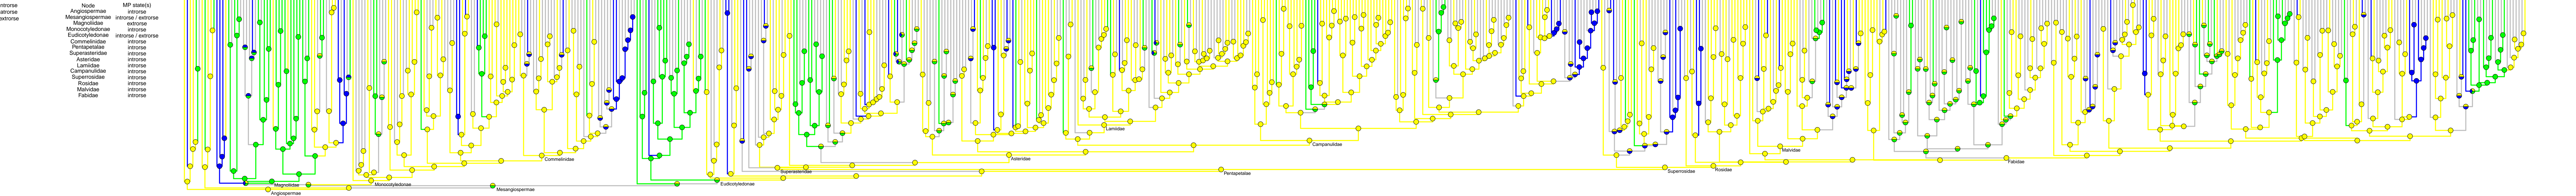

ML ancestral state reconstruction using rayDISC (R:corHMM)

311\_A. Anther orientation (D2D), SYMeq model

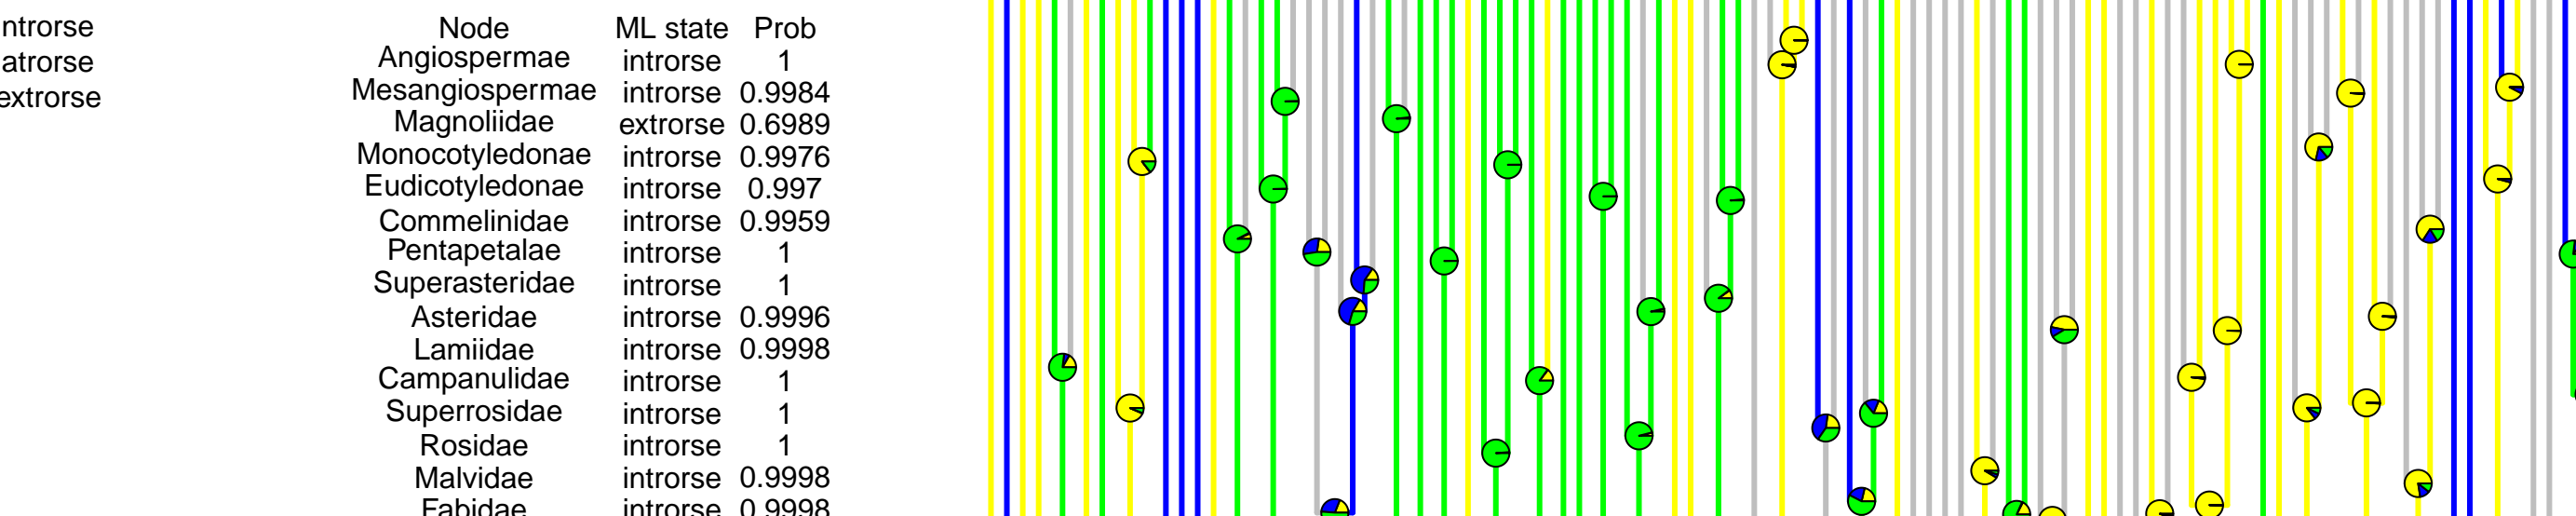

| Model  | LogL    | Npar | AIC    | AICc   | DeltaAICc | w    | q01    | ... |
|--------|---------|------|--------|--------|-----------|------|--------|-----|
| ARD    | -345.14 | 6    | 702.29 | 702.4  | 3.74      | 0.06 | 0.0022 | ... |
| ARDeq  | -344.04 | 6    | 700.08 | 700.19 | 1.54      | 0.18 | 0.0037 | ... |
| ER     | -348.75 | 1    | 699.49 | 699.5  | 0.85      | 0.25 | 0.0027 | ... |
| SYM    | -347.37 | 3    | 700.74 | 700.77 | 2.12      | 0.13 | 0.0031 | ... |
| SYMeq* | -346.31 | 3    | 698.62 | 698.65 | 0         | 0.38 | 0.0031 | ... |

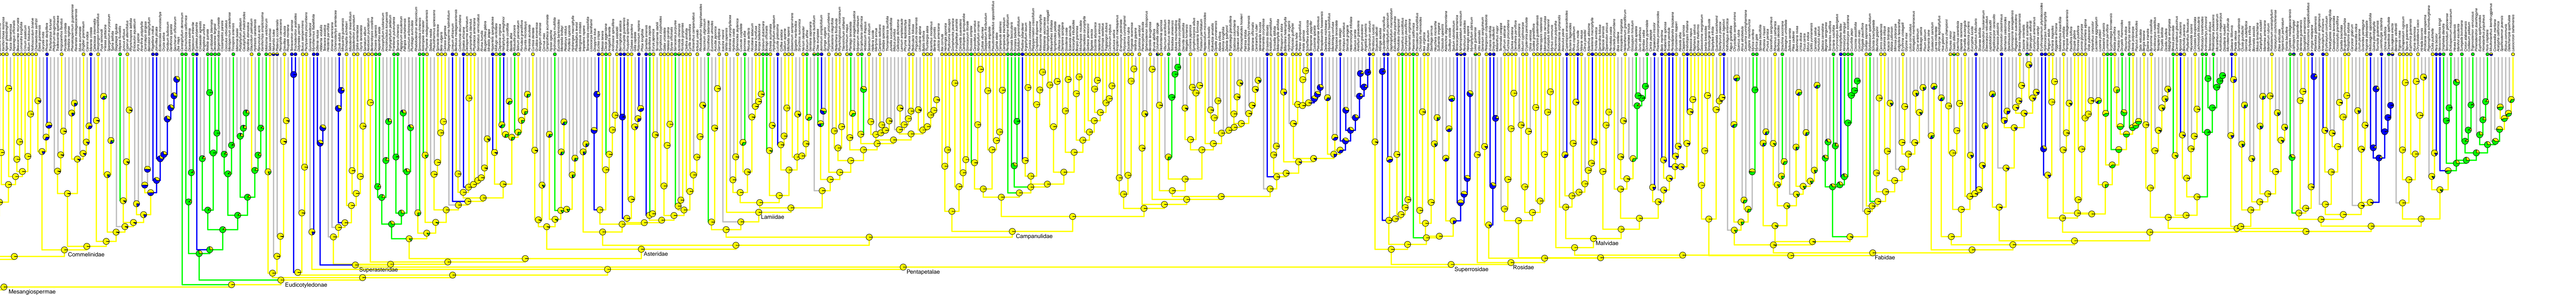

MP ancestral state reconstruction using ancestral.pars  
(R:phangorn)  
312\_A. Anther attachment (binary) (D2d), 98 steps

● basifixed

● dorsifixed

Node

Angiospermae

Mesangiospermae

Magnoliidae

Monocotyledonae

Eudicotyledonae

Commelinidae

Pentapetalae

Superasteridae

Asteridae

Lamiidae

Campanulidae

Superrosidae

Rosidae

Malvidae

Fabidae

MP state(s)

basifixed

basifixed

basifixed

basifixed

basifixed

basifixed

basifixed

basifixed

basifixed

basifixed / dorsifixed

basifixed

basifixed

dorsifixed

dorsifixed

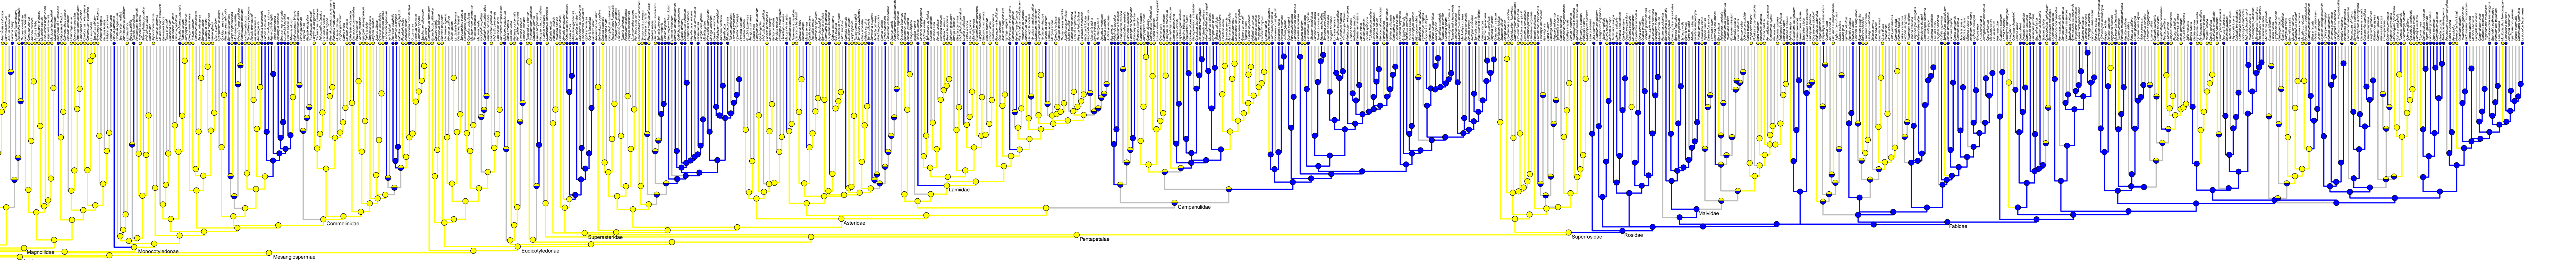



MP ancestral state reconstruction using ancestral.pars

(R:phangorn)  
313\_A. Anther dehiscence (3-state) (D2d), 10 steps

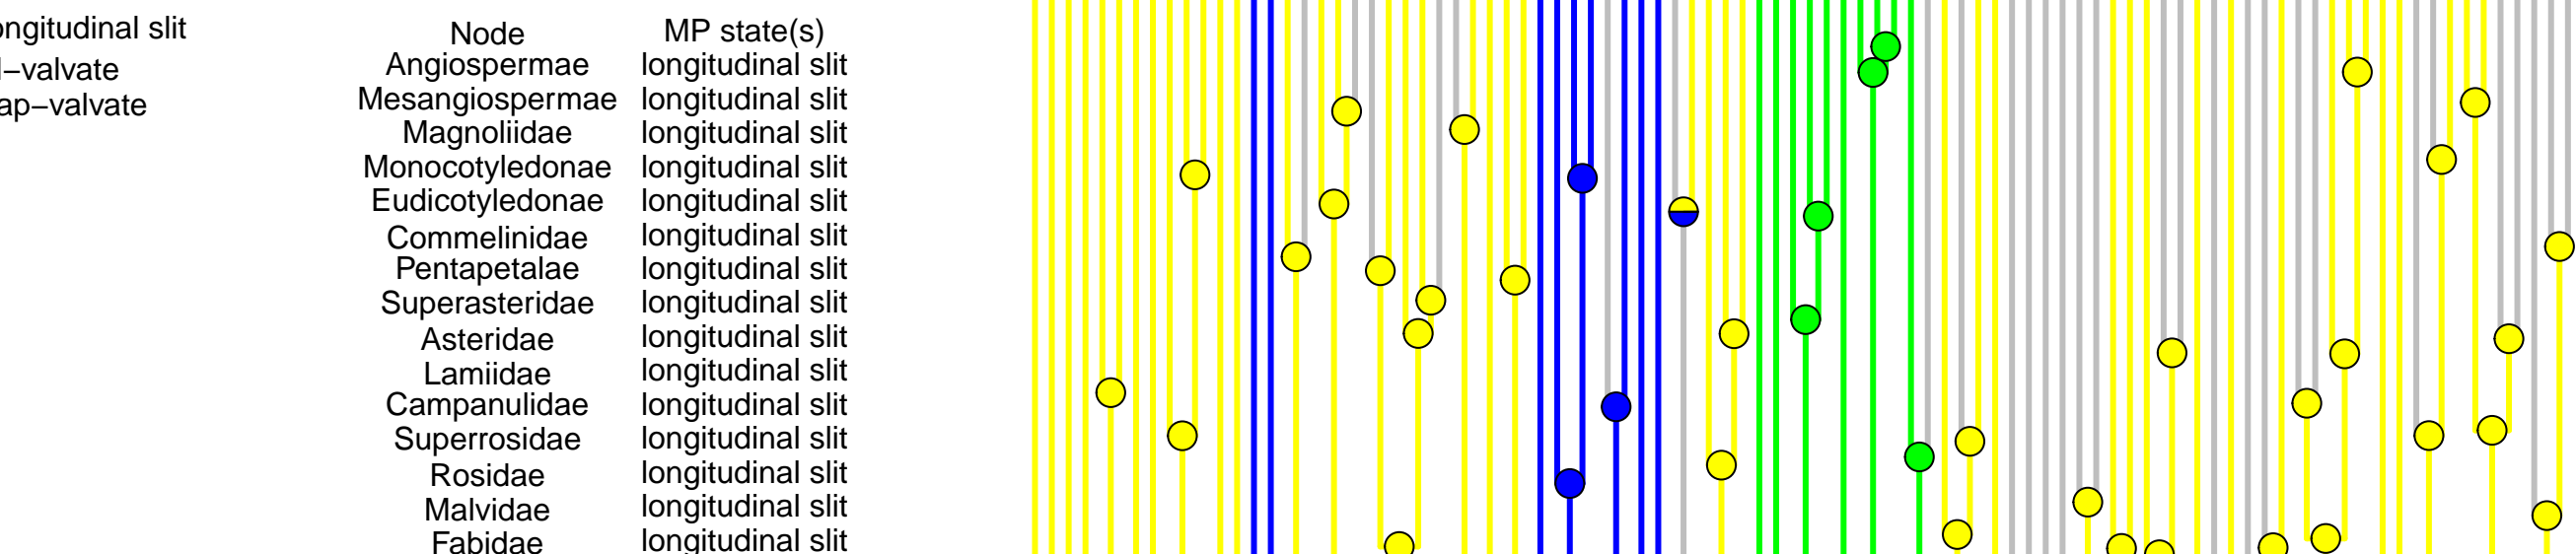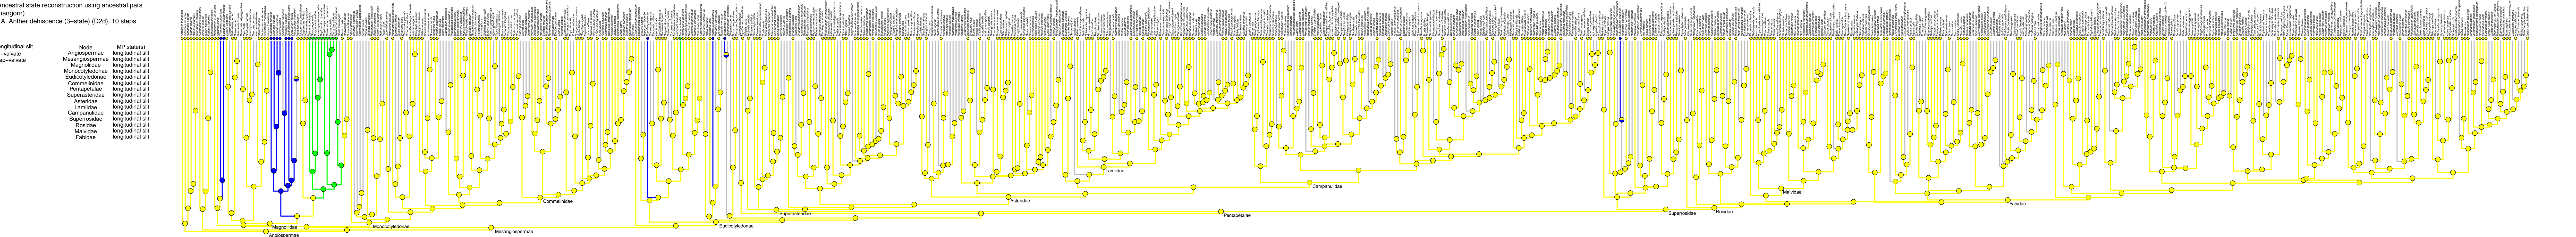

ML ancestral state reconstruction using rayDISC (R:corHMM)  
313\_A. Anther dehiscence (3-state) (D2d), ARDeq model

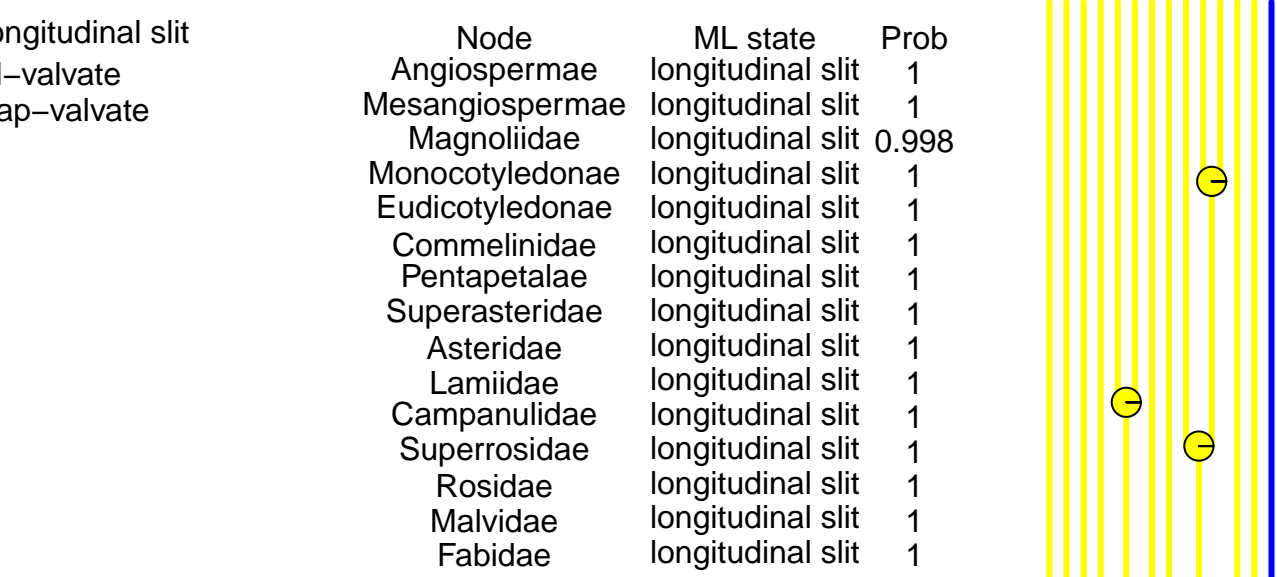

| Model  | LogL   | Npar | AIC    | AICc   | DeltaAICc | w    | q01   | ... |
|--------|--------|------|--------|--------|-----------|------|-------|-----|
| ARD    | -56.75 | 6    | 125.49 | 125.6  | 2         | 0.12 | 2e-04 | ... |
| ARDeq* | -55.65 | 6    | 123.29 | 123.4  | 0         | 0.36 | 2e-04 | ... |
| ER     | -61.26 | 1    | 124.52 | 124.52 | 1.12      | 0.21 | 2e-04 | ... |
| SYM    | -60.23 | 3    | 126.46 | 126.49 | 3.09      | 0.08 | 2e-04 | ... |
| SYMq   | -59.13 | 3    | 124.26 | 124.29 | 0.89      | 0.23 | 2e-04 | ... |

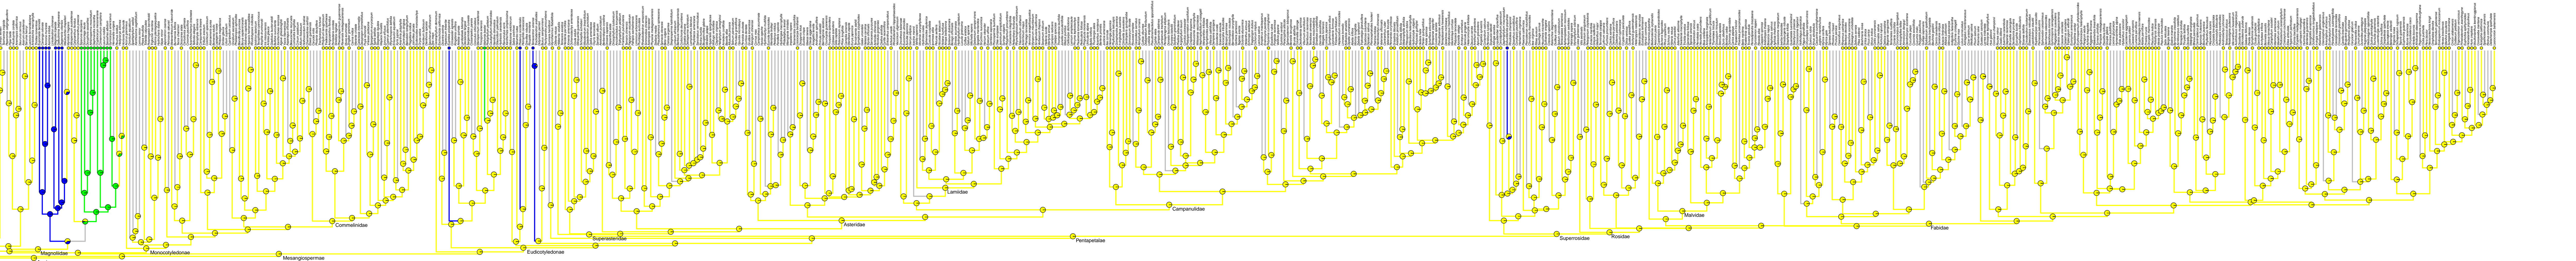

MP ancestral state reconstruction using ancestral.pars

(R:phangorn)  
401\_B. Number of structural carpels (5-state) (D2c), 187 steps

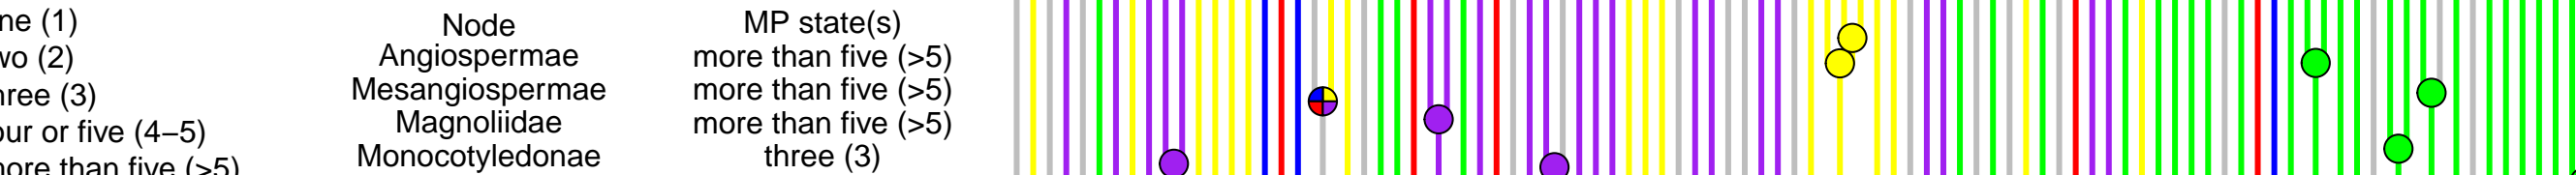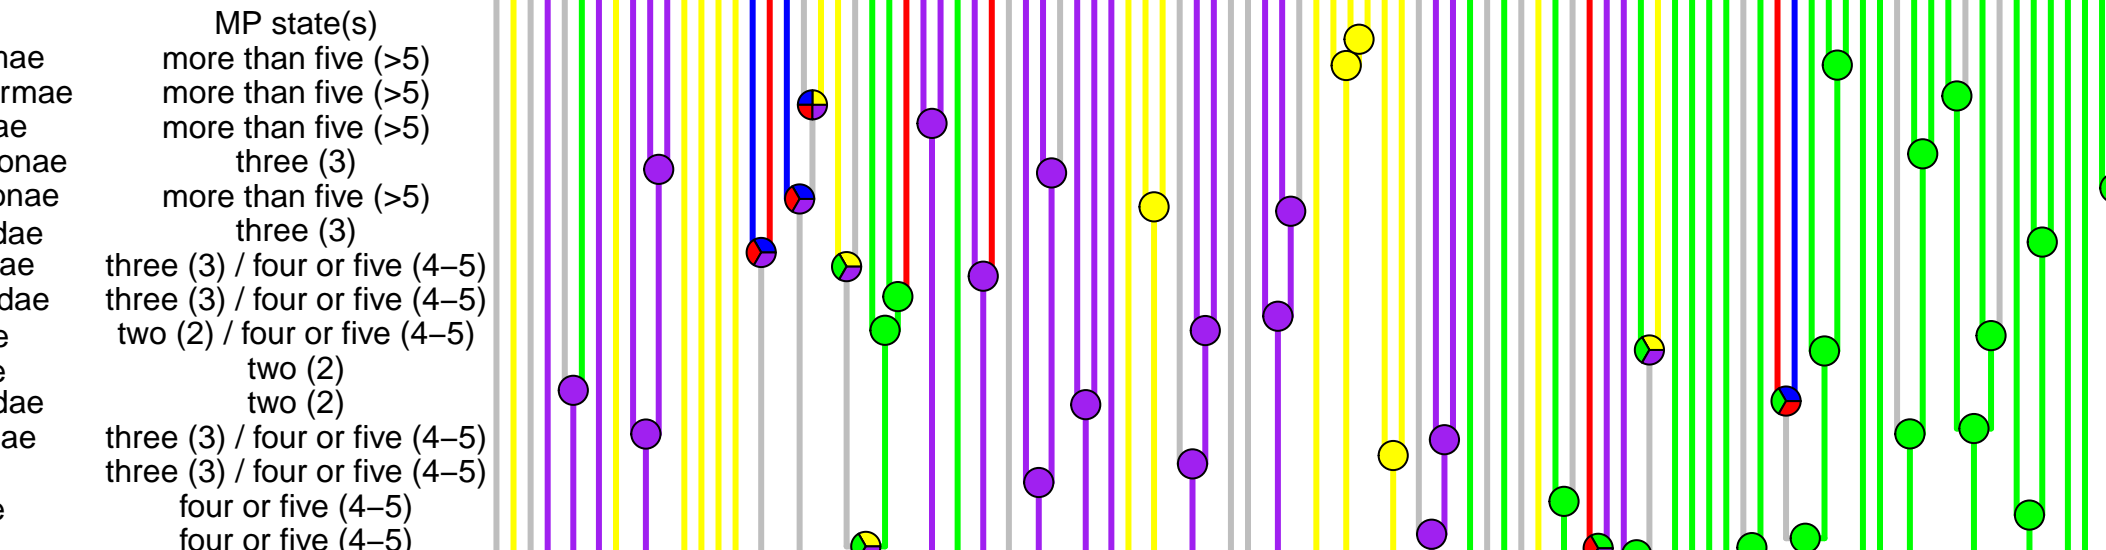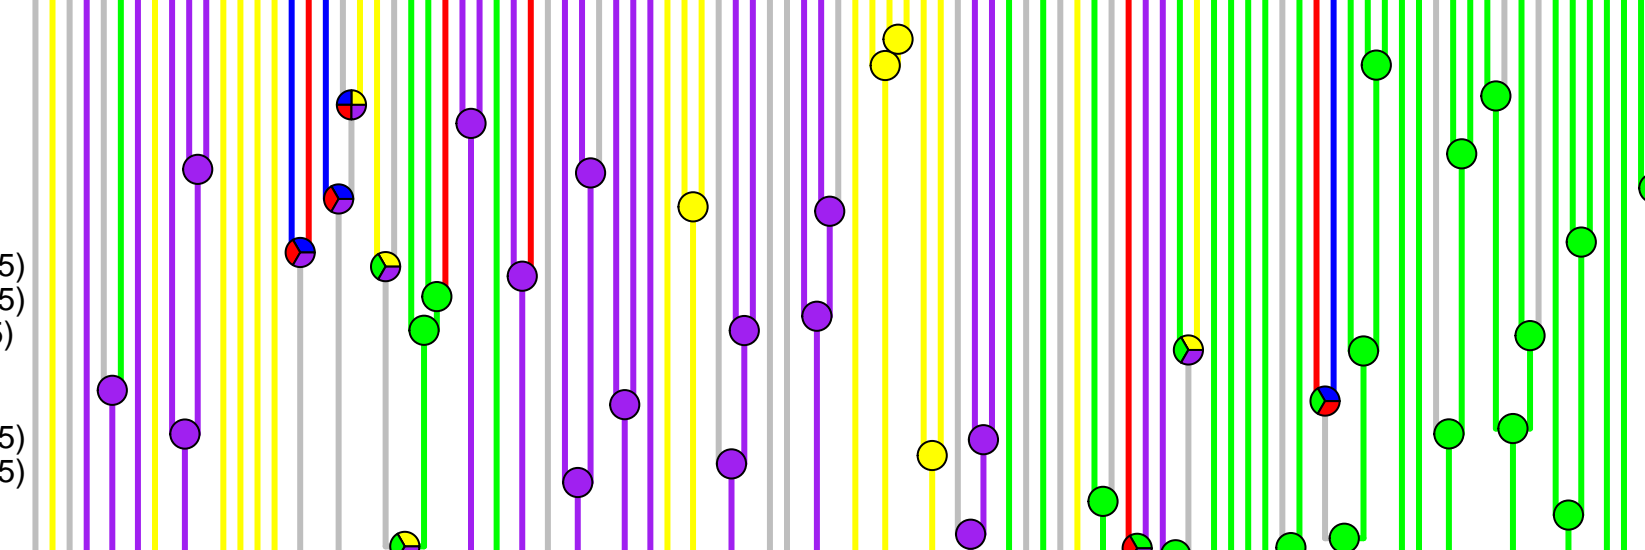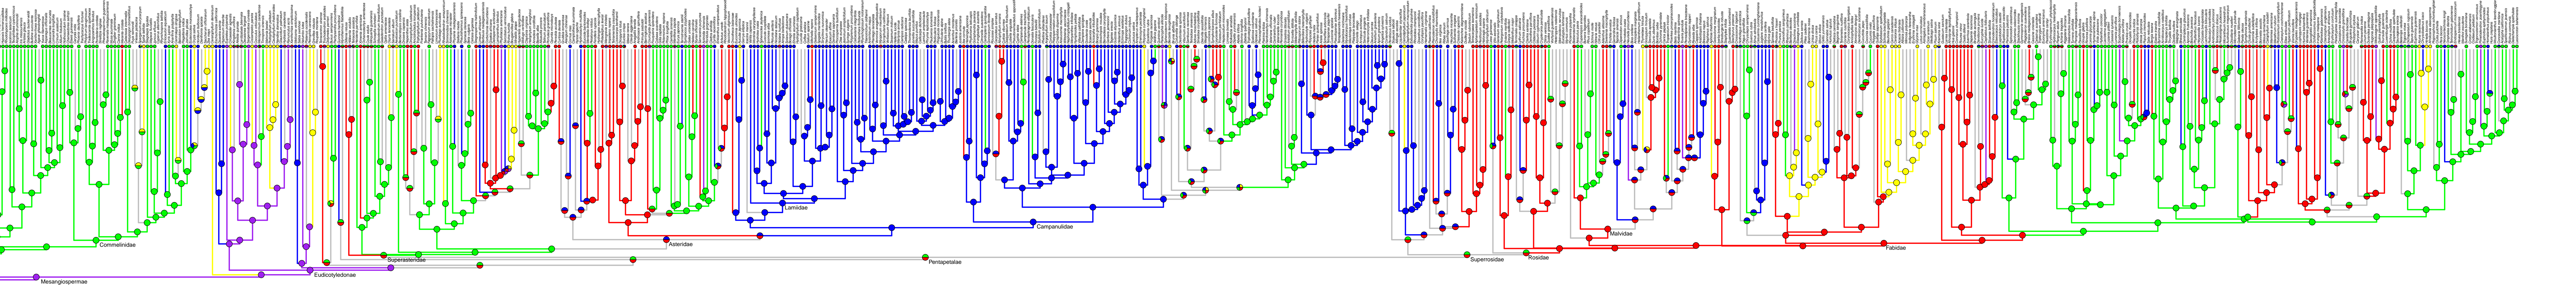

# ML ancestral state reconstruction using rayDISC (R:corHMM)

401\_B. Number of structural carpels (5-state) (D2c), ARDeq model

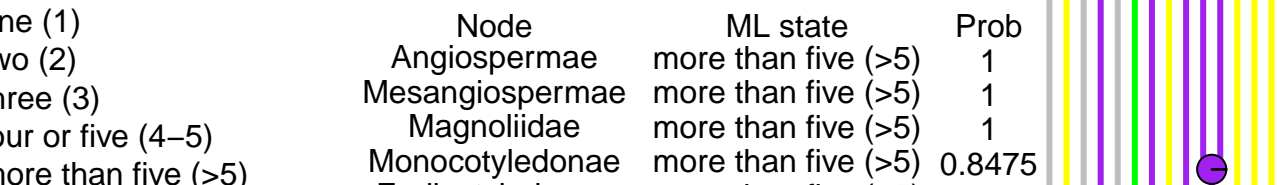

| Model   | LogL    | Npar | AIC     | AICc    | DeltaAICc | w    | q01    | ... |
|---------|---------|------|---------|---------|-----------|------|--------|-----|
| ARD     | -663.57 | 20   | 1367.15 | 1368.24 | 3.22      | 0.17 | 0.0017 | ... |
| ARDeq** | -661.96 | 20   | 1363.93 | 1365.02 | 0         | 0.83 | 0.0017 | ... |
| ER      | -717.57 | 1    | 1437.13 | 1437.14 | 72.12     | 0    | 0.0016 | ... |
| SYM     | -684.18 | 10   | 1385.36 | 1388.64 | 23.62     | 0    | 9e-04  | ... |
| SYMeq   | -682.63 | 10   | 1385.27 | 1385.55 | 20.53     | 0    | 9e-04  | ... |
| ORD     | -754.3  | 8    | 1524.61 | 1524.79 | 159.77    | 0    | 0      | ... |
| ORDeq   | -752.77 | 8    | 1521.54 | 1521.73 | 156.71    | 0    | 0      | ... |
| ORDSYM  | -760.49 | 4    | 1528.97 | 1529.03 | 164.01    | 0    | 0.0042 | ... |
| ORDSYMq | -759.02 | 4    | 1526.04 | 1526.09 | 161.07    | 0    | 0.0042 | ... |
| ORDER   | -765.92 | 1    | 1533.83 | 1533.84 | 168.82    | 0    | 0.0057 | ... |

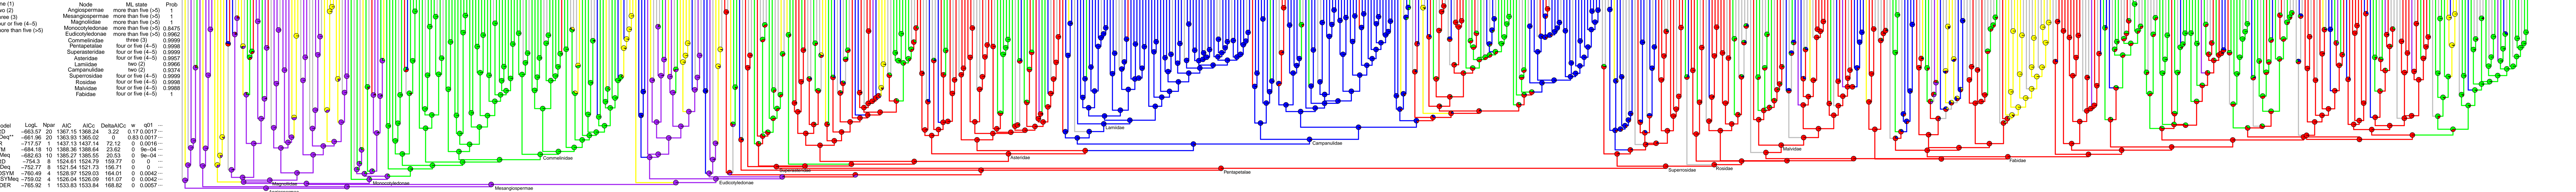

MP ancestral state reconstruction using *ancestral.pars*  
(R:phangorn)  
400\_A. Gynoecium phyllotaxy (D2d), 10 steps

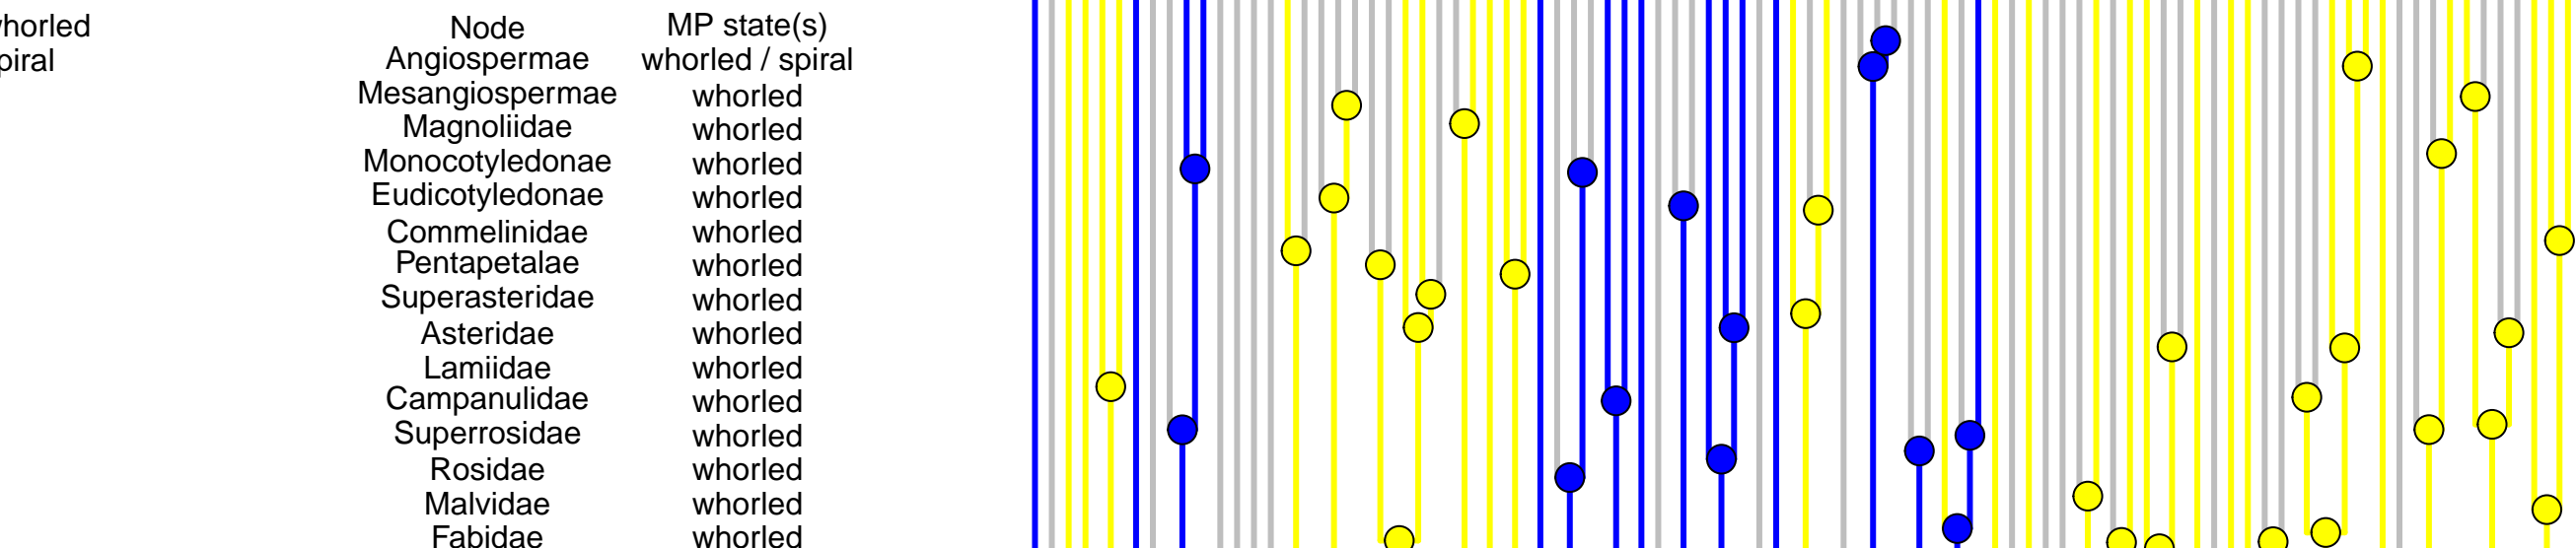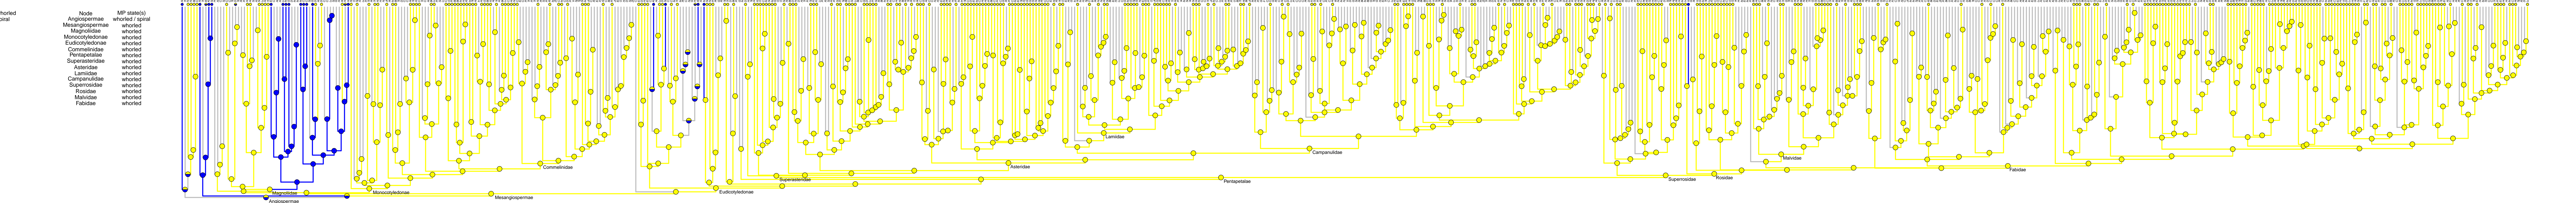

ML ancestral state reconstruction using rayDISC (R:corHMM)  
400\_A. Gynoecium phylotaxy (D2d), ARDeq model

● whorled  
● spiral

| Node            | ML state | Prob   |
|-----------------|----------|--------|
| Angiospermae    | spiral   | 1      |
| Mesangiospermae | spiral   | 1      |
| Magnoliidae     | spiral   | 0.9998 |
| Monocotyledonae | whorled  | 0.5472 |
| Eudicotyledonae | spiral   | 0.9997 |
| Commelinidae    | whorled  | 0.9997 |
| Pentapetalae    | whorled  | 0.9777 |
| Superasteridae  | whorled  | 0.9928 |
| Asteridae       | whorled  | 1      |
| Lamiidae        | whorled  | 1      |
| Campanulidae    | whorled  | 1      |
| Superrosidae    | whorled  | 0.9802 |
| Rosidae         | whorled  | 0.9804 |
| Malvidae        | whorled  | 1      |
| Fabidae         | whorled  | 1      |

| Model   | LogL   | Npar | AIC    | AICc   | DeltaAICc | w    | q01   | q10    |
|---------|--------|------|--------|--------|-----------|------|-------|--------|
| ARD     | -39.69 | 2    | 83.37  | 83.39  | 1.39      | 0.61 | 1e-04 | 0.0082 |
| ARDeq** | -38.99 | 2    | 81.98  | 82     | 0         | 0.63 | 1e-04 | 0.0082 |
| ER      | -51.09 | 1    | 104.18 | 104.19 | 22.19     | 0    | 4e-04 | 4e-04  |
| UNI01   | -52.93 | 1    | 107.85 | 107.86 | 25.86     | 0    | 4e-04 |        |
| UNI10   | -42.4  | 1    | 86.8   | 86.81  | 4.81      | 0.06 |       | 0.0096 |

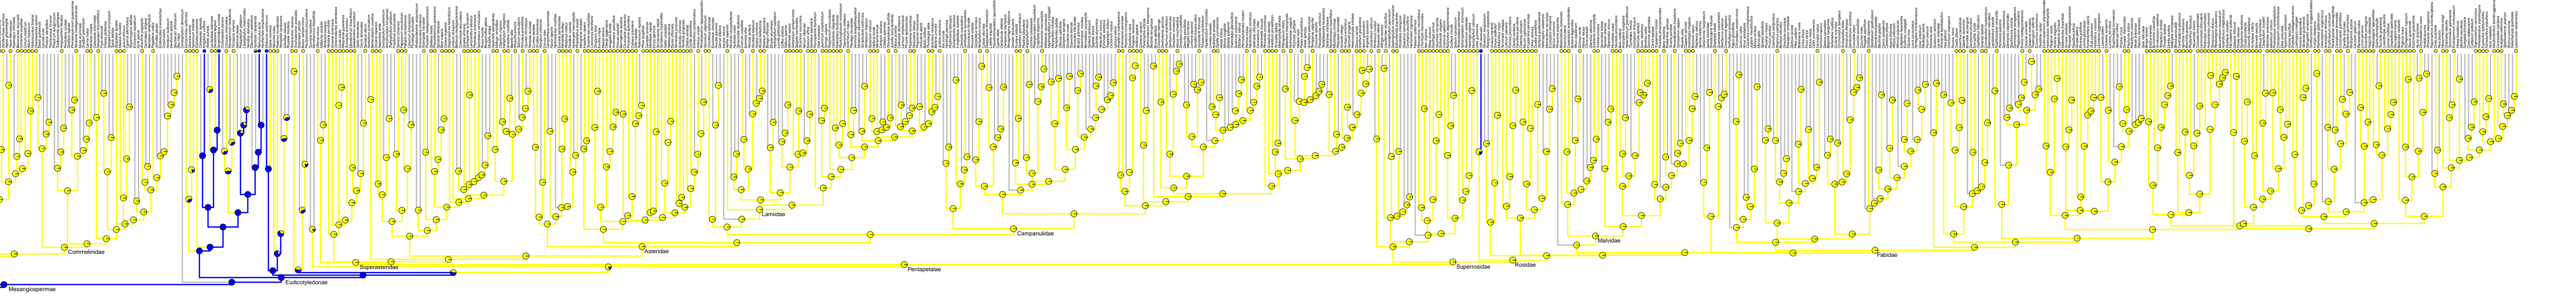

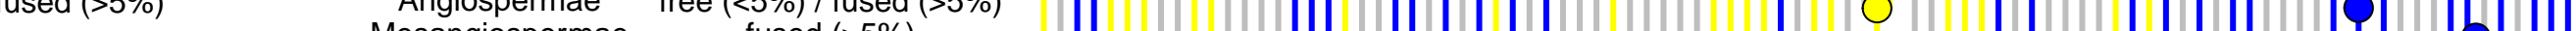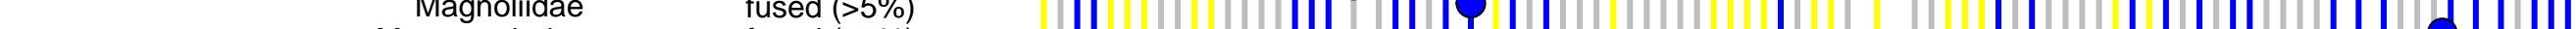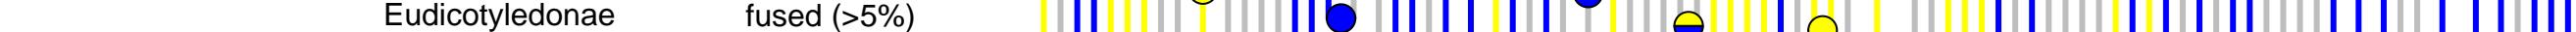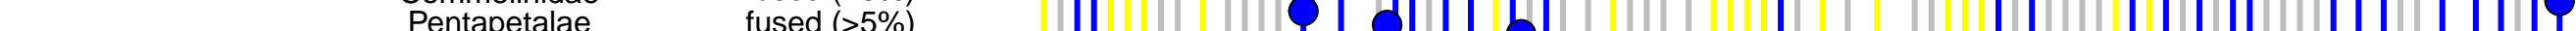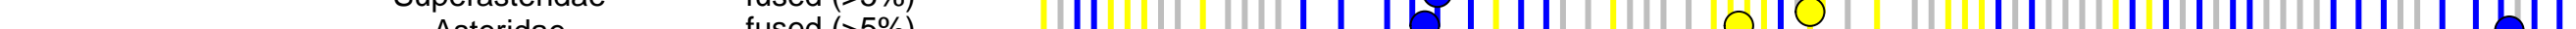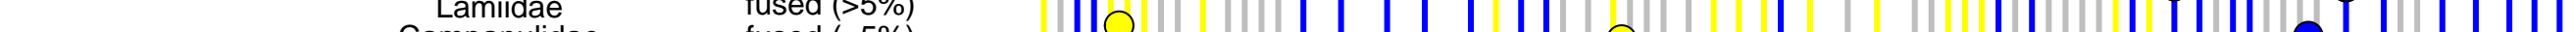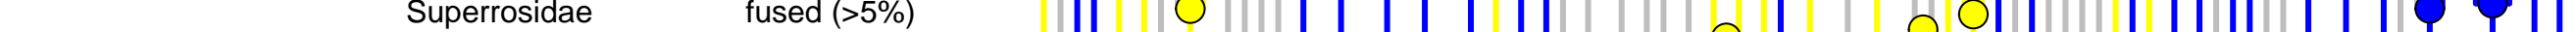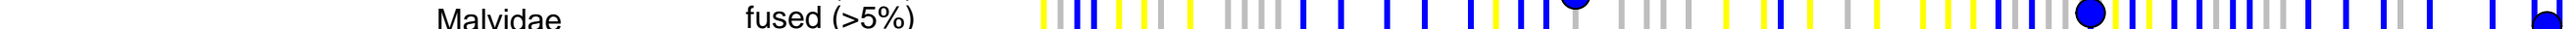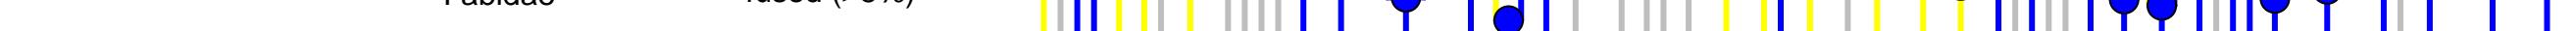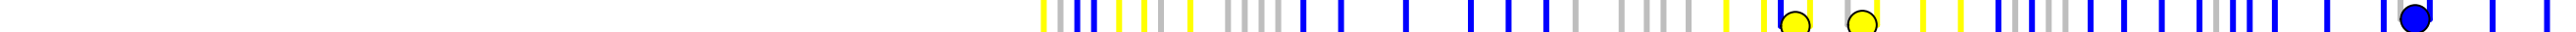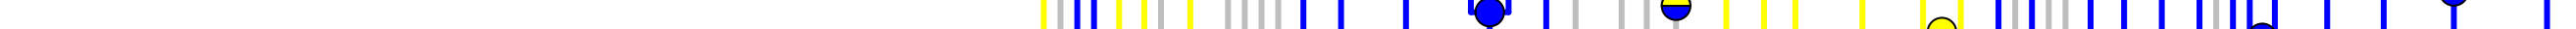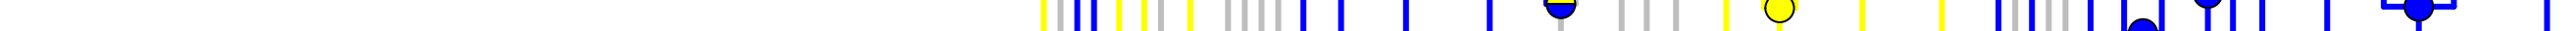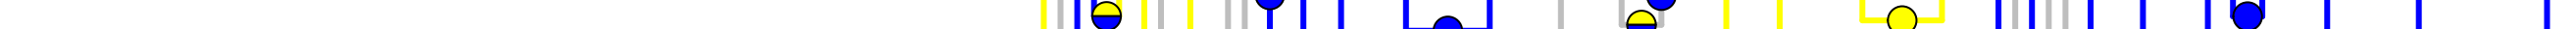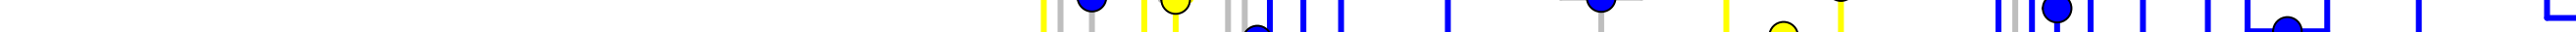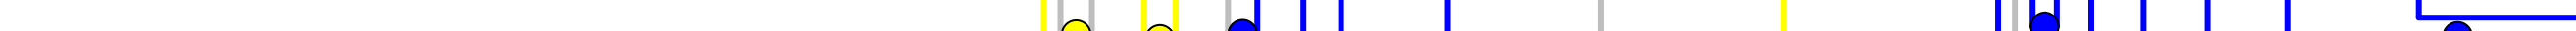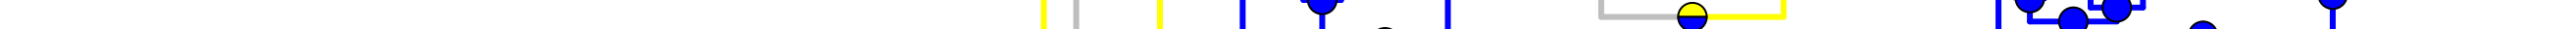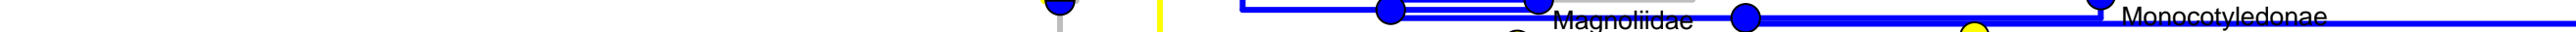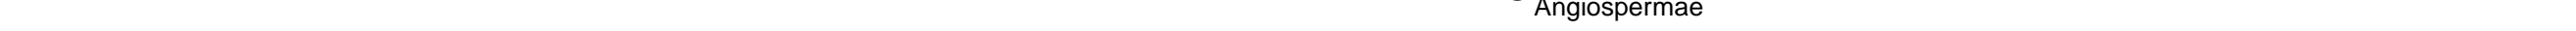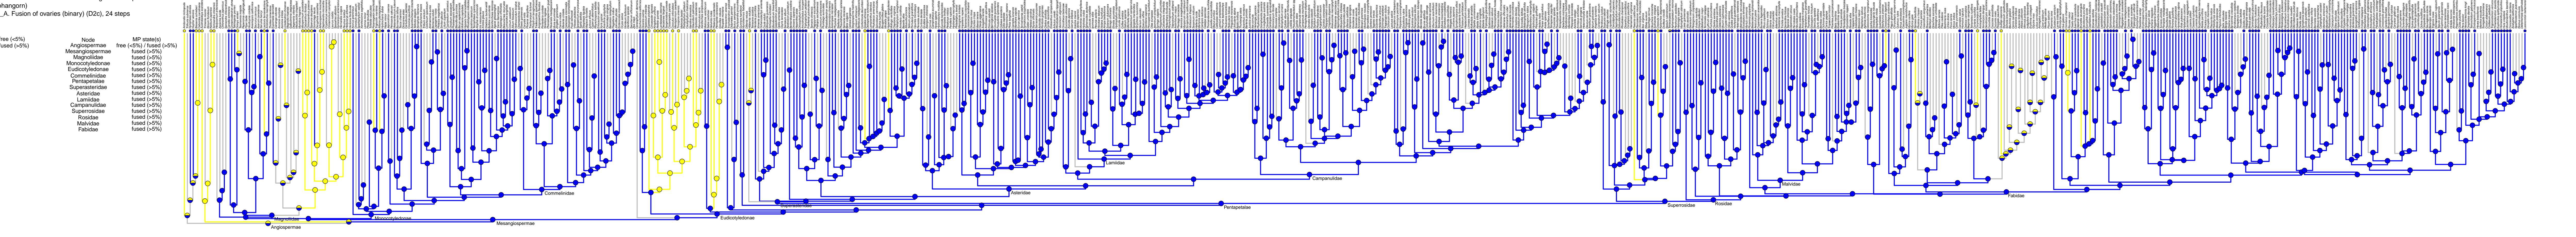



MP ancestral state reconstruction using ancestral.pars  
(R:phangorn)

411\_A. Number of ovules per functional carpel (3-state) (D2c), 120 steps

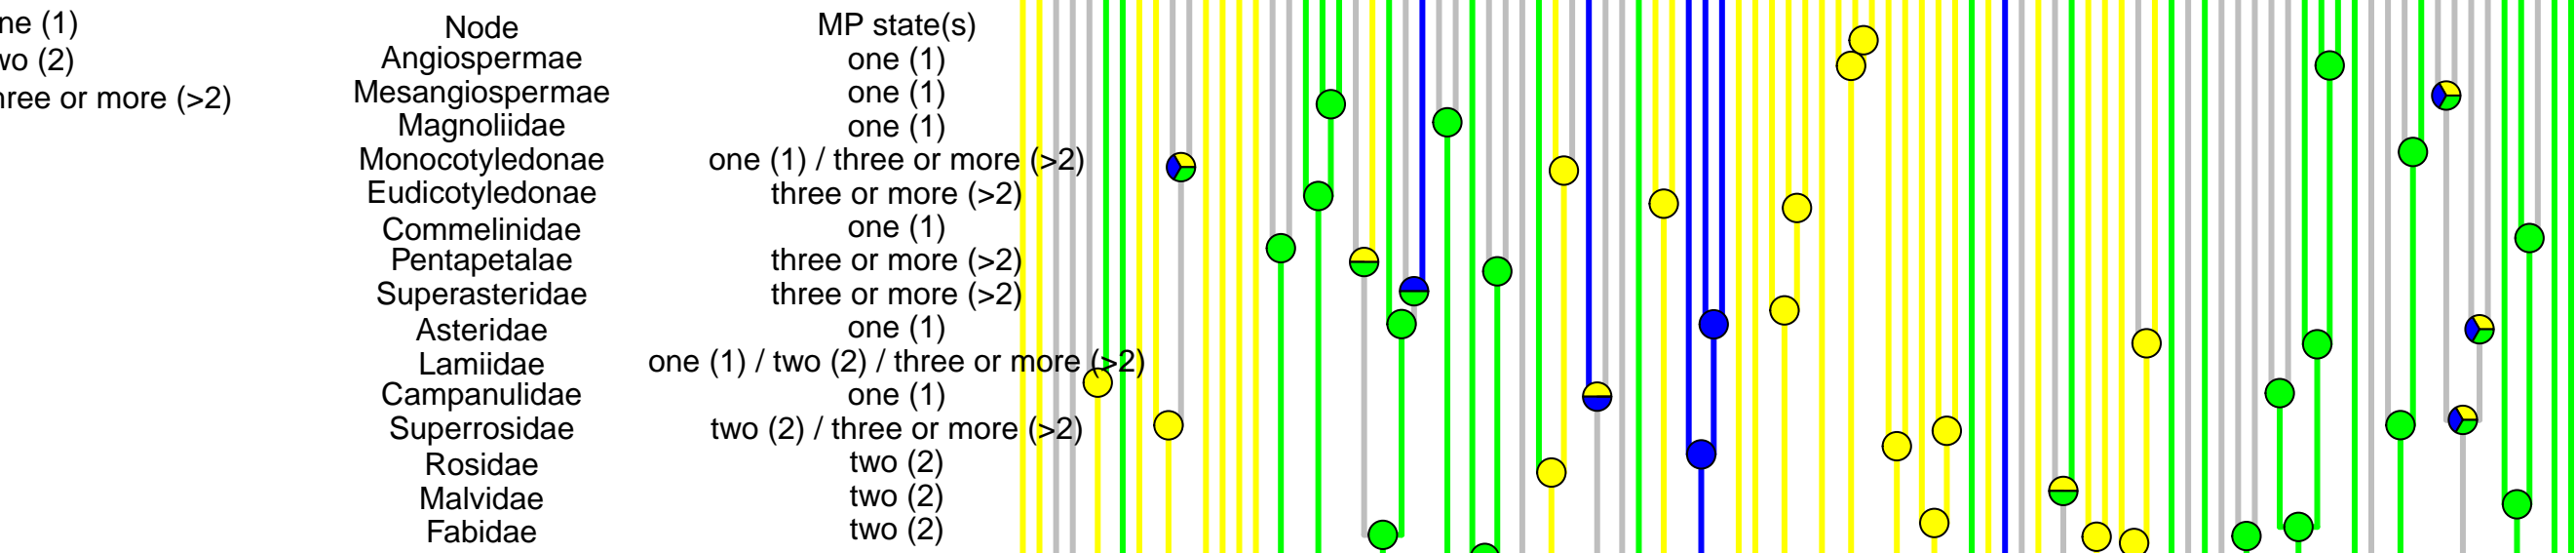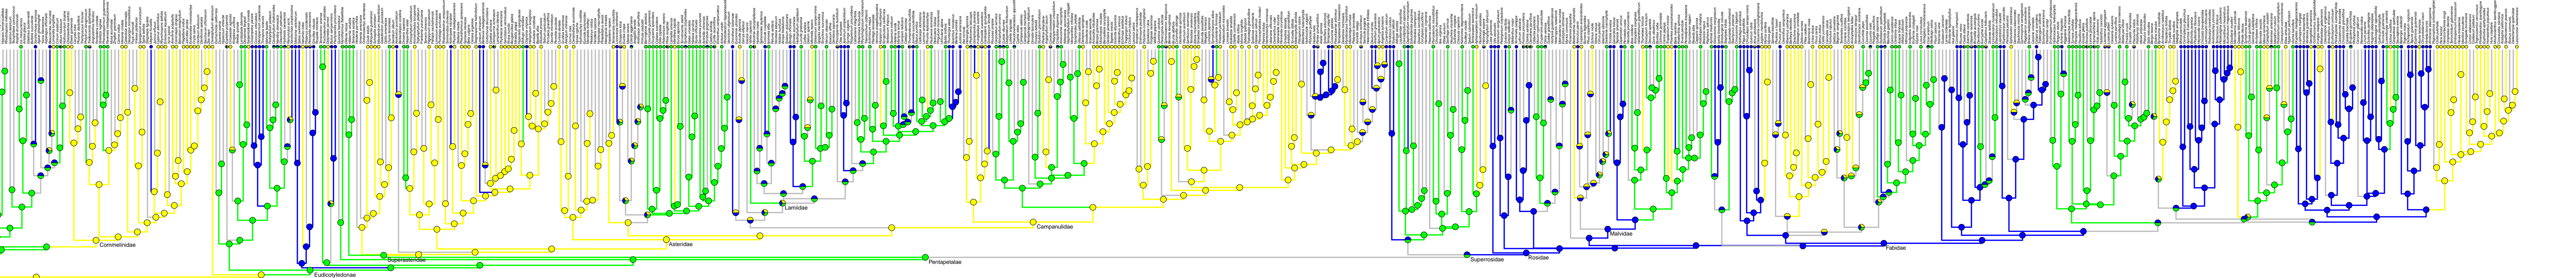

ML ancestral state reconstruction using rayDISC (R:corHMM)

411\_A. Number of ovules per functional carpel (3-state) (D2c), ARDeq model

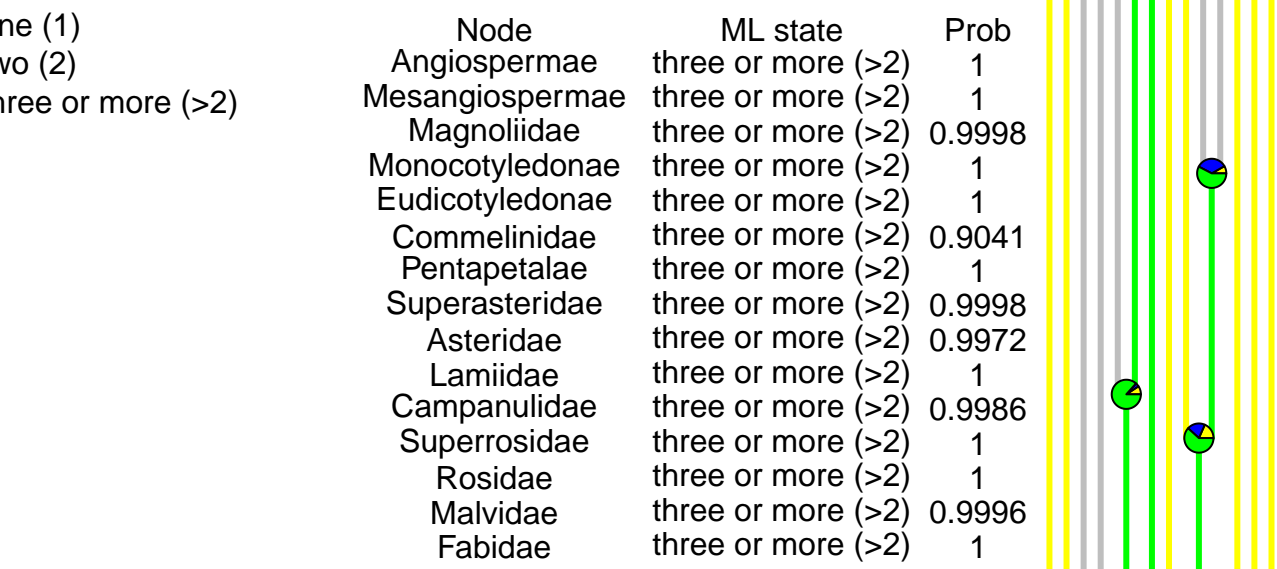

| Model    | LogL    | Npar | AIC    | AICc   | DeltaAICc | w    | q01    | ... |
|----------|---------|------|--------|--------|-----------|------|--------|-----|
| ARD      | -386.85 | 6    | 785.7  | 785.8  | 2.19      | 0.25 | 0.0013 | ... |
| ARDeq**  | -385.75 | 6    | 783.51 | 783.61 | 0         | 0.75 | 0.0013 | ... |
| ER       | -402.49 | 1    | 806.98 | 806.99 | 23.37     | 0    | 0.0028 | ... |
| SYM      | -401.96 | 3    | 809.92 | 809.95 | 26.34     | 0    | 0.0029 | ... |
| SYMeq    | -400.99 | 3    | 807.98 | 808.02 | 24.4      | 0    | 0.0025 | ... |
| ORD      | -398.93 | 4    | 805.86 | 805.91 | 22.3      | 0    | 5e-04  | ... |
| ORDeq    | -397.84 | 4    | 803.67 | 803.72 | 20.11     | 0    | 5e-04  | ... |
| ORDSYM   | -412.5  | 2    | 828.99 | 829.01 | 45.39     | 0    | 0.0054 | ... |
| ORDSYMeq | -411.57 | 2    | 827.14 | 827.15 | 43.54     | 0    | 0.0054 | ... |
| ORDER    | -413.51 | 1    | 829.02 | 829.03 | 45.41     | 0    | 0.0062 | ... |

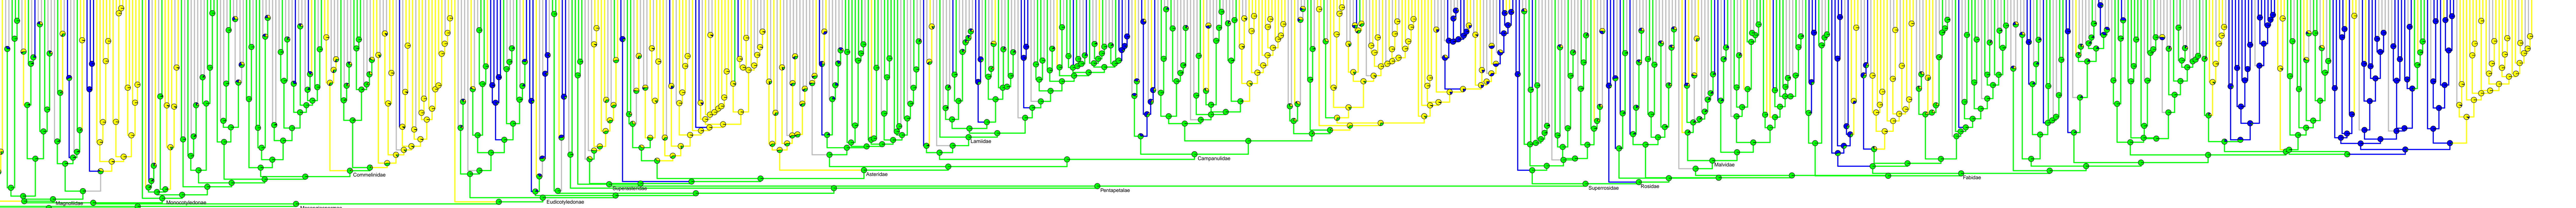

Supplement: Supplementary Data 15 [file ncomms16047-s16.pdf]
