# Supplementary material for: The ancestral flower of angiosperms and its early diversification
Source: Nat Commun. 2017 Aug 1;8:16047. doi: 10.1038/ncomms16047 (PMC5543309; doi:10.1038/ncomms16047)

MP ancestral state reconstruction using `ancestral.pars`  
(R:phangorn)  
100\_A. Functional sex of flowers (D2d), 98 steps

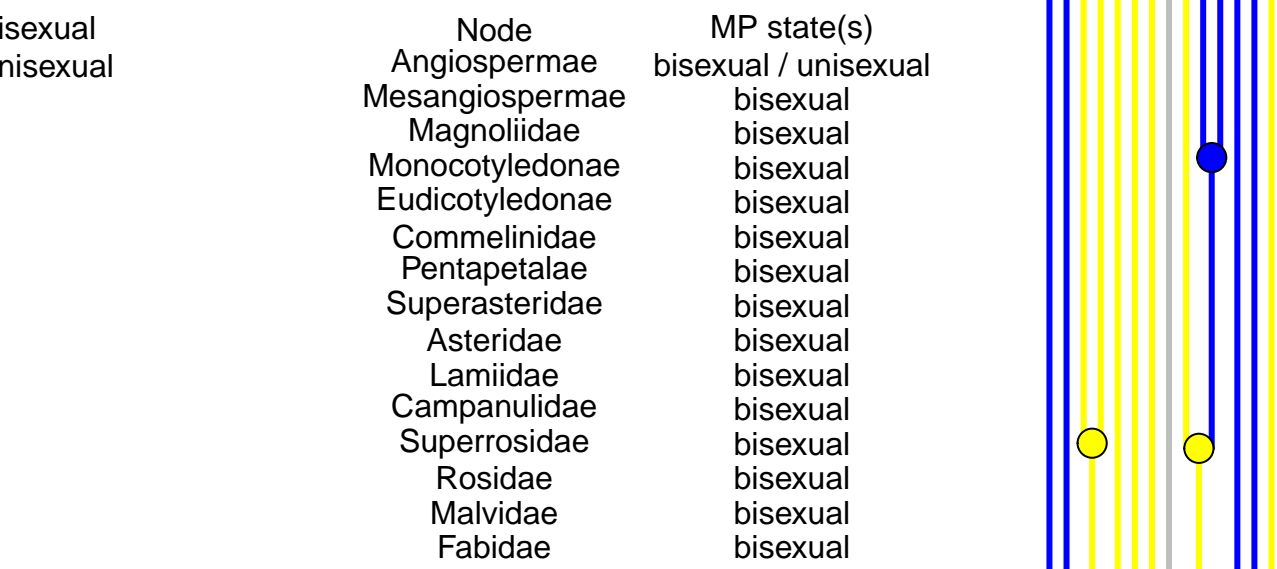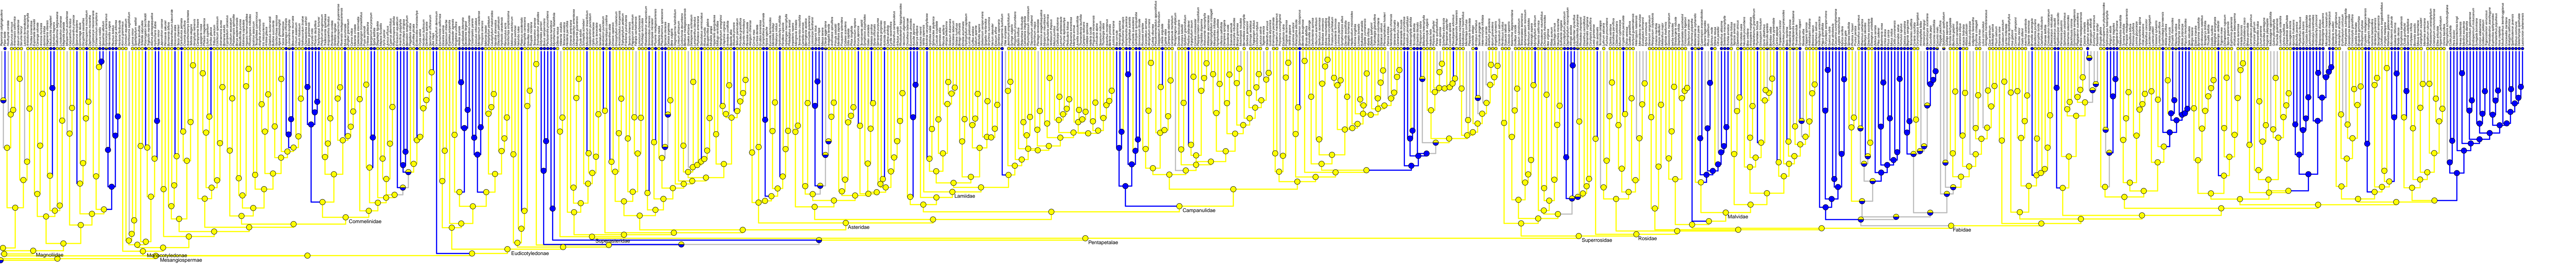





ML ancestral state reconstruction using rayDISC (R:corHMM)  
100\_B. Structural sex of flowers (D2d), ARDeq model

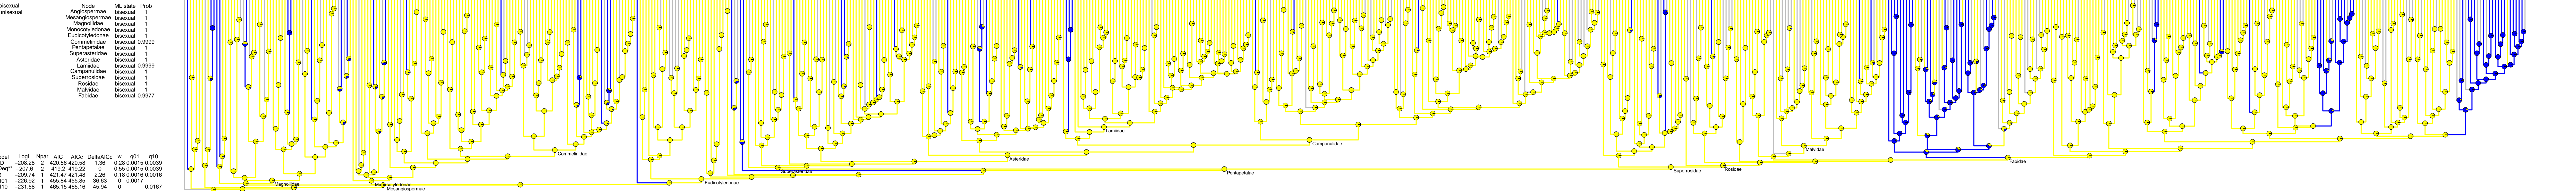







ML ancestral state reconstruction using rayDISC (R:corHMM)  
201\_A. Perianth presence (D2c). UNI10 model

● absent  
● present

| Node            | ML state | Prob |
|-----------------|----------|------|
| Angiospermae    | present  | 1    |
| Mesangiospermae | present  | 1    |
| Magnoliidae     | present  | 1    |
| Monocotyledonae | present  | 1    |
| Eudicotyledonae | present  | 1    |
| Commelinidae    | present  | 1    |
| Pentapetalae    | present  | 1    |
| Superasteridae  | present  | 1    |
| Asteridae       | present  | 1    |
| Lamiidae        | present  | 1    |
| Campanulidae    | present  | 1    |
| Superrosidae    | present  | 1    |
| Rosidae         | present  | 1    |
| Malvidae        | present  | 1    |
| Fabidae         | present  | 1    |

| Model  | LogL    | Npar | AIC    | AICc   | DeltaAICc | w    | q01    | q10   |
|--------|---------|------|--------|--------|-----------|------|--------|-------|
| ARD    | -96.83  | 2    | 197.67 | 197.69 | 2.01      | 0.13 | 0      | 5e-04 |
| ARDeq  | -96.14  | 2    | 196.28 | 196.3  | 0.62      | 0.26 | 0      | 5e-04 |
| ER     | -97.11  | 1    | 196.21 | 196.22 | 0.54      | 0.27 | 5e-04  | 5e-04 |
| UNI01  | -109.88 | 1    | 221.76 | 221.76 | 26.09     | 0    | 0.0224 |       |
| UNI10* | -96.83  | 1    | 195.67 | 195.67 | 0         | 0.35 |        | 5e-04 |

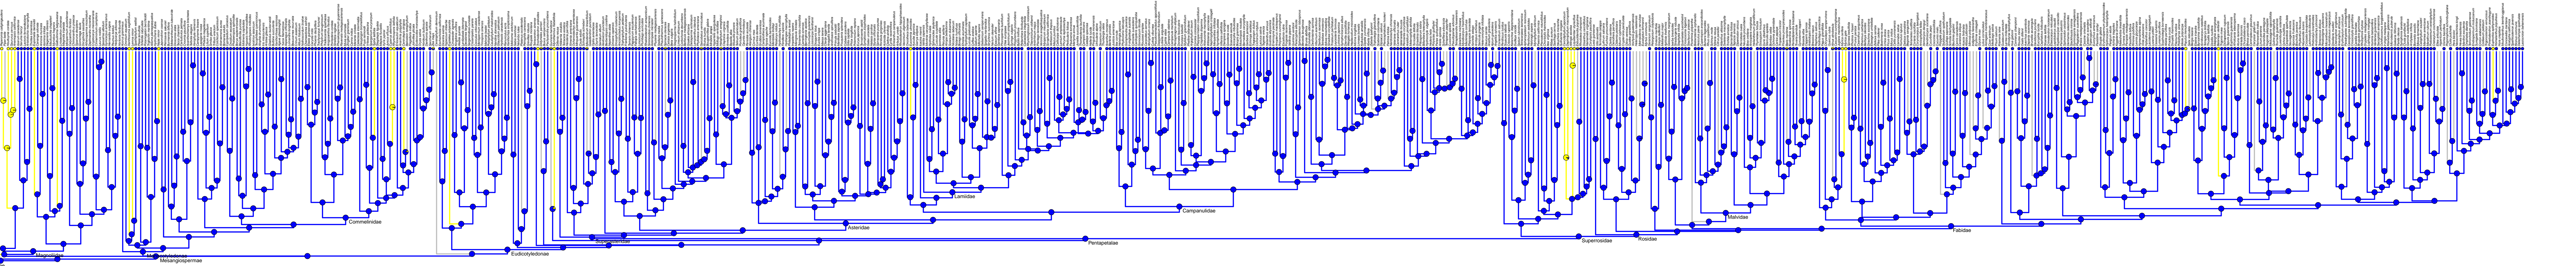

[illegible][illegible]

201 B Number of perianth parts (3-state) (D2c) ARDeg model

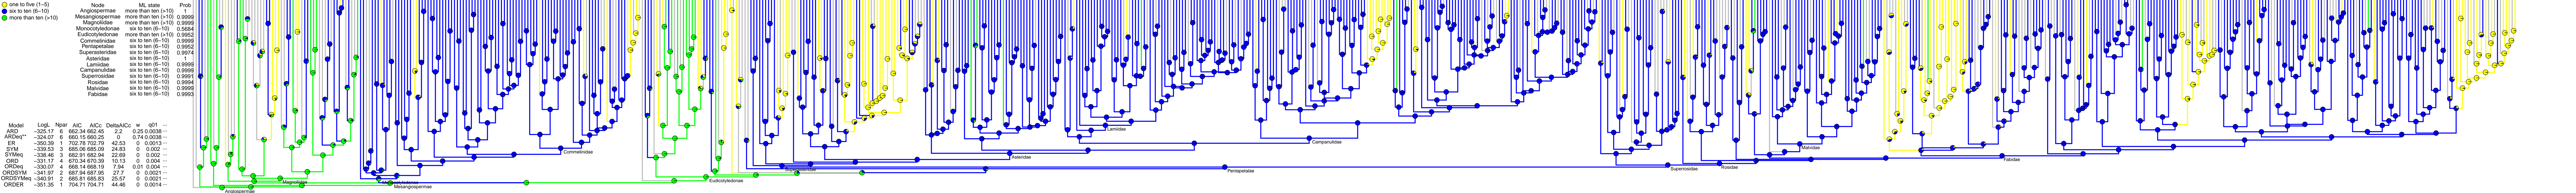

MP ancestral state reconstruction using ancestral.pars

(R:phangorn)

201\_C. Number of perianth parts (binary) (D2c), 69 steps

- one to six (1-6)  
● more than six (>6)

- Node  
Angiospermae  
Mesangiospermae  
Magnoliidae  
Monocotyledonae  
Eudicotyledonae  
Commelinidae  
Pentapetalae  
Superasteridae  
Asteridae  
Lamiidae  
Campanulidae  
Superrosidae  
Rosidae  
Malvidae  
Fabidae

- MP state(s)  
more than six (>6)  
one to six (1-6) / more than six (>6)  
one to six (1-6) / more than six (>6)  
one to six (1-6)  
one to six (1-6)  
more than six (>6)  
more than six (>6)

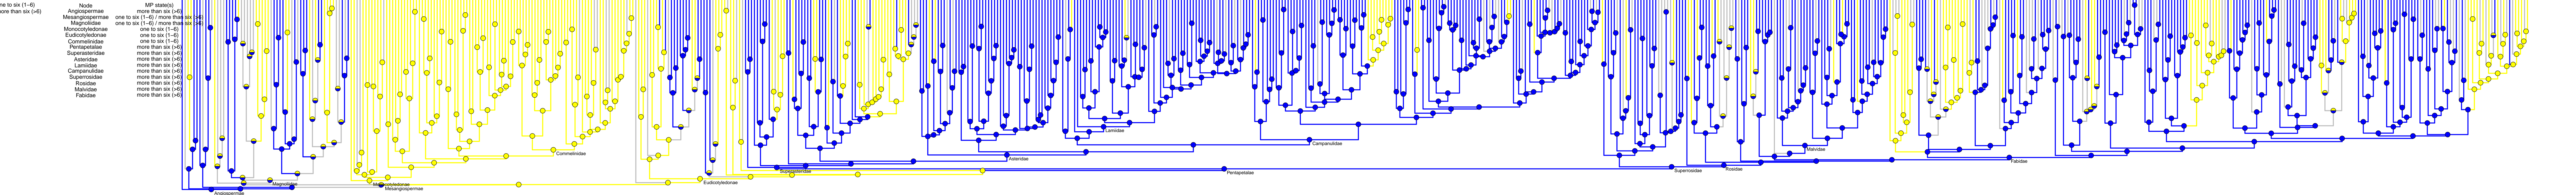

ML ancestral state reconstruction using rayDISC (R:corHMM)

201\_C. Number of perianth parts (binary) (D2c), ARDeq model

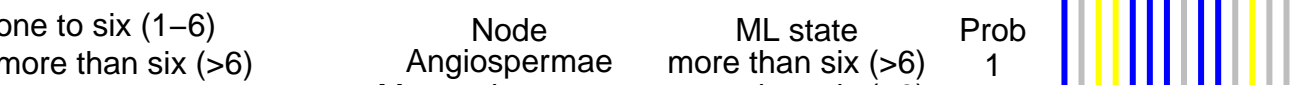

| Node            | ML state           |
|-----------------|--------------------|
| Angiospermae    | more than six (>6) |
| Mesangiospermae | more than six (>6) |
| Magnoliidae     | more than six (>6) |
| Monocotyledonae | one to six (1–6)   |
| Eudicotyledonae | more than six (>6) |
| Commelinidae    | one to six (1–6)   |
| Pentapetalae    | more than six (>6) |
| Superasteridae  | more than six (>6) |
| Asteridae       | more than six (>6) |
| Lamiidae        | more than six (>6) |
| Campanulidae    | more than six (>6) |
| Superrosidae    | more than six (>6) |
| Rosidae         | more than six (>6) |
| Malvidae        | more than six (>6) |
| Fabidae         | more than six (>6) |

| Model   | LogL    | Npar | AIC    | AICc   | DeltaAICc | w    | q01    | q10    |
|---------|---------|------|--------|--------|-----------|------|--------|--------|
| ARD     | -247.75 | 2    | 499.51 | 499.52 | 1.39      | 0.33 | 6e-04  | 0.0026 |
| ARDeq** | -247.06 | 2    | 498.12 | 498.14 | 0         | 0.66 | 6e-04  | 0.0026 |
| ER      | -254.33 | 1    | 510.67 | 510.67 | 12.54     | 0    | 0.0022 | 0.0022 |
| UNI01   | -323.73 | 1    | 649.45 | 649.46 | 151.32    | 0    | 0.0083 |        |
| UNI10   | -252.79 | 1    | 507.58 | 507.59 | 9.45      | 0.01 | 0.0029 |        |

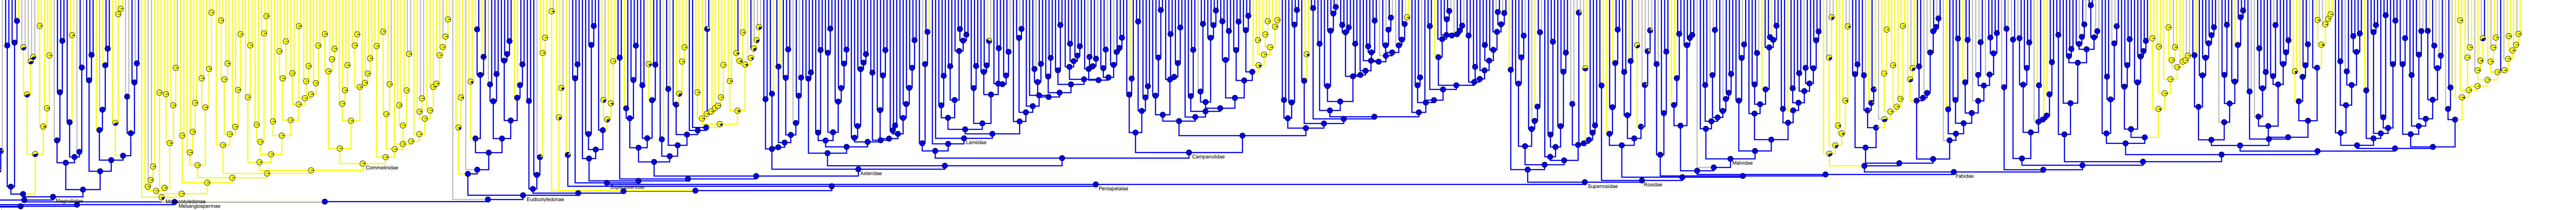

MP ancestral state reconstruction using ancestral.pars  
(R:phangorn)  
230\_A. Perianth phyllotaxy (binary) (D2d), 16 steps

● whorled  
● spiral

Node MP state(s)  
Angiospermae whorled / spiral  
Mesangiospermae whorled  
Magnoliidae whorled  
Monocotyledonae whorled  
Eudicotyledonae whorled  
Commelinidae whorled  
Pentapetalae whorled  
Superasteridae whorled  
Asteridae whorled  
Lamiidae whorled  
Campanulidae whorled  
Superosidae whorled  
Rosidae whorled  
Malvidae whorled  
Fabidae whorled

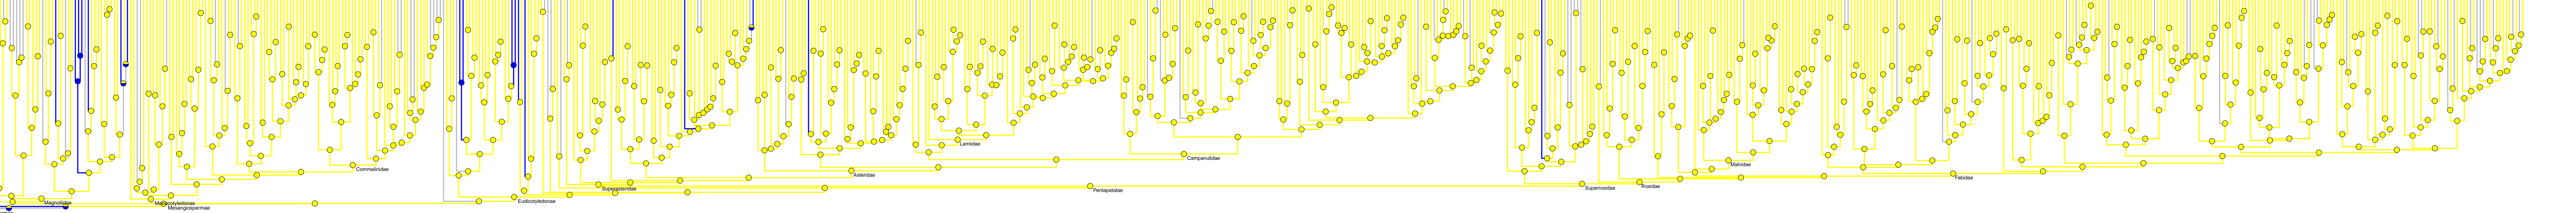

ML ancestral state reconstruction using rayDISC (R:corHMM)  
230\_A\_Perianth phyllotaxy (binary) (D2d), ARD model

|                 | Node    | ML state | Prob |
|-----------------|---------|----------|------|
| ● whorled       |         |          |      |
| ● spiral        |         |          |      |
| Angiospermae    | spiral  | 1        |      |
| Mesangiospermae | spiral  | 1        |      |
| Magnoliidae     | spiral  | 0.9997   |      |
| Monocotyledonae | spiral  | 0.5143   |      |
| Eudicotyledonae | spiral  | 0.9996   |      |
| Commelinidae    | whorled | 0.9998   |      |
| Pentapetalae    | whorled | 0.9804   |      |
| Superasteridae  | whorled | 0.9835   |      |
| Asteridae       | whorled | 0.9997   |      |
| Lamiidae        | whorled | 1        |      |
| Campanulidae    | whorled | 1        |      |
| Superrosidae    | whorled | 0.9919   |      |
| Rosidae         | whorled | 0.9951   |      |
| Malvidae        | whorled | 1        |      |
| Fabidae         | whorled | 1        |      |

| Model | LogL   | Npar | AIC    | AICc   | DeltaAICc | w    | q01   | q10    |
|-------|--------|------|--------|--------|-----------|------|-------|--------|
| ARD** | -70.06 | 2    | 144.12 | 144.13 | 0         | 0.99 | 2e-04 | 0.011  |
| ARDeq | -77.1  | 2    | 158.19 | 158.21 | 14.07     | 0    | 4e-04 | 5e-04  |
| ER    | -77.75 | 1    | 157.5  | 157.5  | 13.37     | 0    | 4e-04 | 4e-04  |
| UNI01 | -78    | 1    | 158    | 158.01 | 13.87     | 0    | 4e-04 |        |
| UNI10 | -76.04 | 1    | 154.08 | 154.08 | 9.95      | 0.01 |       | 0.0178 |

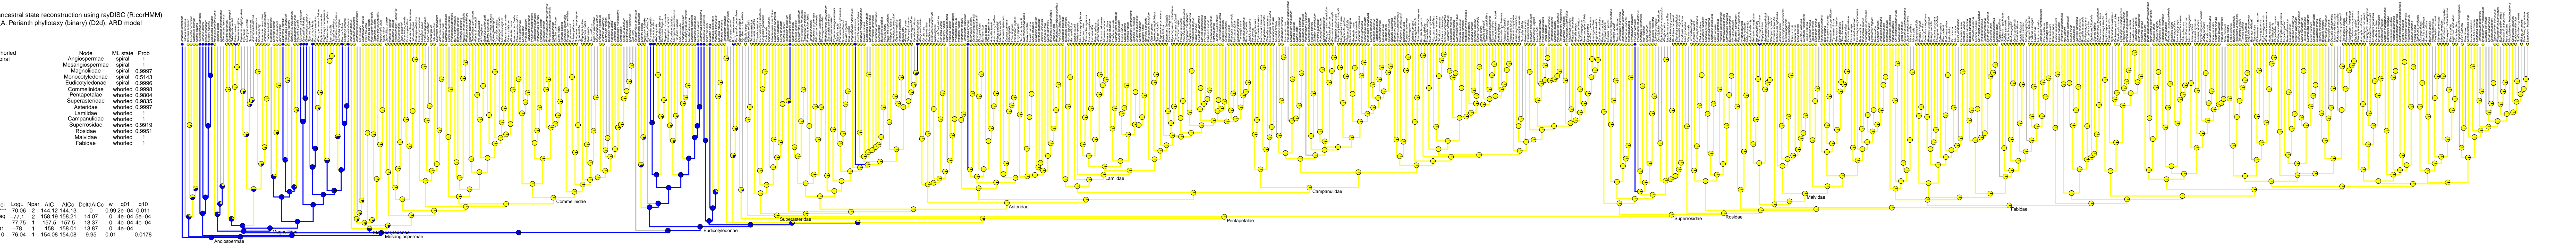



ML ancestral state reconstruction using rayDISC (R:corHMM)  
231\_A. Number of perianth whorls (D2c), ARDeq model

- one (1)  
● two (2)  
● more than two (>2)

| Model    | LogL    | Npar | AIC    | AICc   | DeltaAICc | w    | q01    | ... |
|----------|---------|------|--------|--------|-----------|------|--------|-----|
| ARD      | -269.95 | 6    | 551.91 | 552.02 | 2.2       | 0.25 | 0.0046 | ... |
| ARDeq**  | -268.86 | 6    | 549.71 | 549.82 | 0         | 0.75 | 0.0046 | ... |
| ER       | -311.23 | 1    | 624.46 | 624.46 | 74.64     | 0    | 0.001  | ... |
| SYM      | -292.92 | 3    | 591.85 | 591.88 | 42.06     | 0    | 0.0019 | ... |
| SYMeq    | -291.92 | 3    | 589.84 | 589.87 | 40.05     | 0    | 0.0019 | ... |
| ORD      | -277.05 | 4    | 562.1  | 562.15 | 12.33     | 0    | 0.0045 | ... |
| ORDeq    | -275.95 | 4    | 559.9  | 559.95 | 10.13     | 0    | 0.0045 | ... |
| ORDSYM   | -298.13 | 2    | 600.27 | 600.28 | 50.46     | 0    | 0.0019 | ... |
| ORDSYMeq | -297.05 | 2    | 598.1  | 598.12 | 48.3      | 0    | 0.0019 | ... |
| ORDER    | -313.56 | 1    | 629.13 | 629.13 | 79.32     | 0    | 0.0012 | ... |

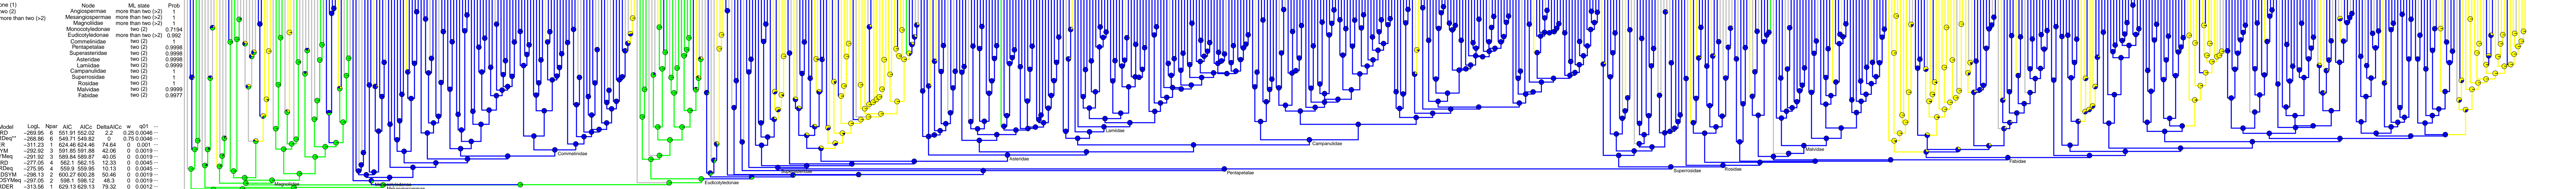

MP ancestral state reconstruction using ancestral.pars  
(R:phangorn)  
232\_A. Perianth merism (4-state) (D2c), 84 steps

● dimerous  
● trimerous  
● tetramerous  
● pentamerous

Node  
Angiospermae  
Mesangiospermae  
Magnoliidae  
Monocotyledonae  
Eudicotyledonae  
Commelinidae  
Pentapetalae  
Superasteridae  
Asteridae  
Lamiidae  
Campanulidae  
Superrosidae  
Rosidae  
Malvidae  
Fabidae

MP state(s)  
trimerous  
trimerous  
trimerous  
trimerous  
trimerous / trimerous  
trimerous  
pentamerous  
pentamerous  
pentamerous  
pentamerous  
pentamerous  
pentamerous  
pentamerous  
pentamerous  
pentamerous

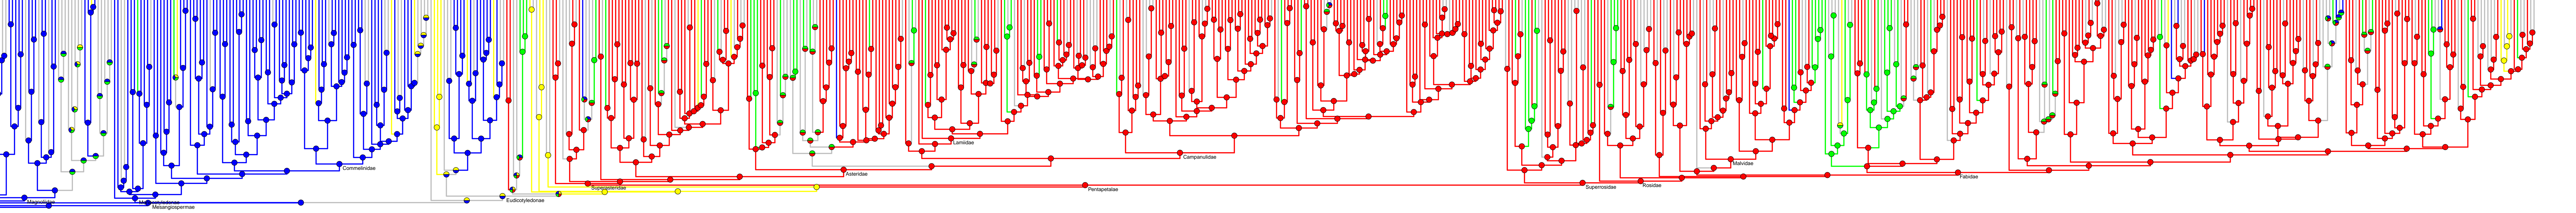

ML ancestral state reconstruction using rayDISC (R:corHMM)  
232\_A\_Perianth merism (4-state) (D2c), SYMeq model

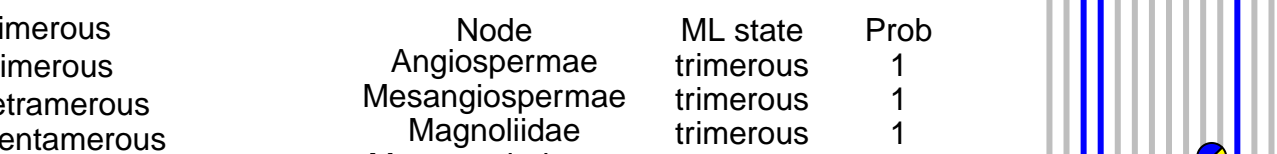

| Node            | ML state    | Prob   |
|-----------------|-------------|--------|
| Angiospermae    | trimerous   | 1      |
| Mesangiospermae | trimerous   | 1      |
| Magnoliidae     | trimerous   | 1      |
| Monocotyledonae | trimerous   | 1      |
| Eudicotyledonae | trimerous   | 0.9676 |
| Commelinidae    | trimerous   | 1      |
| Pentapetalae    | pentamerous | 0.9997 |
| Superasteridae  | pentamerous | 1      |
| Asteridae       | pentamerous | 1      |
| Lamiidae        | pentamerous | 1      |
| Campanulidae    | pentamerous | 1      |
| Superrosidae    | pentamerous | 1      |
| Rosidae         | pentamerous | 1      |
| Malvidae        | pentamerous | 1      |
| Fabidae         | pentamerous | 1      |

| Model    | LogL    | Npar | AIC    | AICc   | DeltaAICc | w    | q01    | ... |
|----------|---------|------|--------|--------|-----------|------|--------|-----|
| ARD      | -323.65 | 12   | 671.31 | 671.71 | 10.48     | 0    | 0      | ... |
| ARDeq    | -322.29 | 12   | 668.57 | 668.98 | 7.75      | 0.02 | 0      | ... |
| ER       | -360.68 | 1    | 723.35 | 723.36 | 62.13     | 0    | 8e-04  | ... |
| SYM      | -325.94 | 6    | 663.88 | 663.99 | 2.76      | 0.2  | 0.0013 | ... |
| SYMeq**  | -324.56 | 6    | 661.12 | 661.22 | 0         | 0.78 | 0.0013 | ... |
| ORD      | -336.72 | 6    | 685.43 | 685.54 | 24.32     | 0    | 0      | ... |
| ORDeq    | -335.4  | 6    | 682.81 | 682.92 | 21.69     | 0    | 0      | ... |
| ORDSYM   | -344.43 | 3    | 694.87 | 694.9  | 33.68     | 0    | 0.002  | ... |
| ORDSYMeq | -343.06 | 3    | 692.12 | 692.15 | 30.93     | 0    | 0.002  | ... |
| ORDER    | -345.97 | 1    | 693.93 | 693.94 | 32.71     | 0    | 0.0025 | ... |

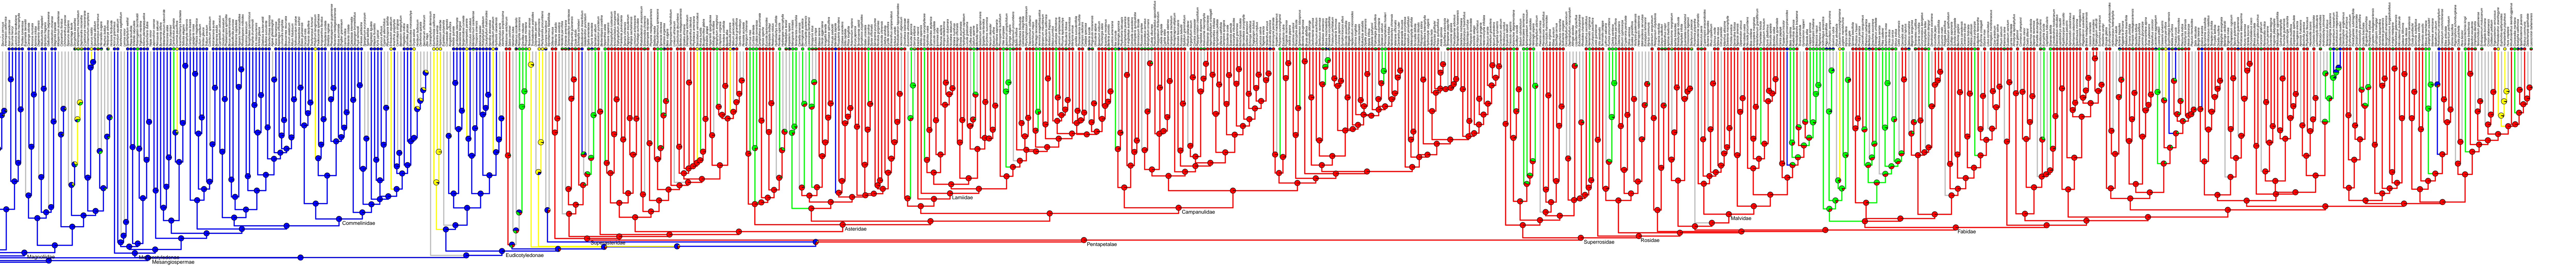

MP ancestral state reconstruction using ancestral.pars  
(R:phangorn)  
232\_B. Perianth merism (3-state) (D2c), 70 steps

● trimerous  
● tetramerous  
● pentamerous

Node  
Angiospermae  
Mesangiospermae  
Magnoliidae  
Monocotyledonae  
Eudicotyledonae  
Commelinidae  
Pentapetalae  
Superasteridae  
Asteridae  
Lamiidae  
Campanulidae  
Superrosidae  
Rosidae  
Malvidae  
Fabidae

MP state(s)  
trimerous  
trimerous  
trimerous  
trimerous  
trimerous  
trimerous  
pentamerous  
pentamerous  
pentamerous  
pentamerous  
pentamerous  
pentamerous  
pentamerous  
pentamerous  
pentamerous

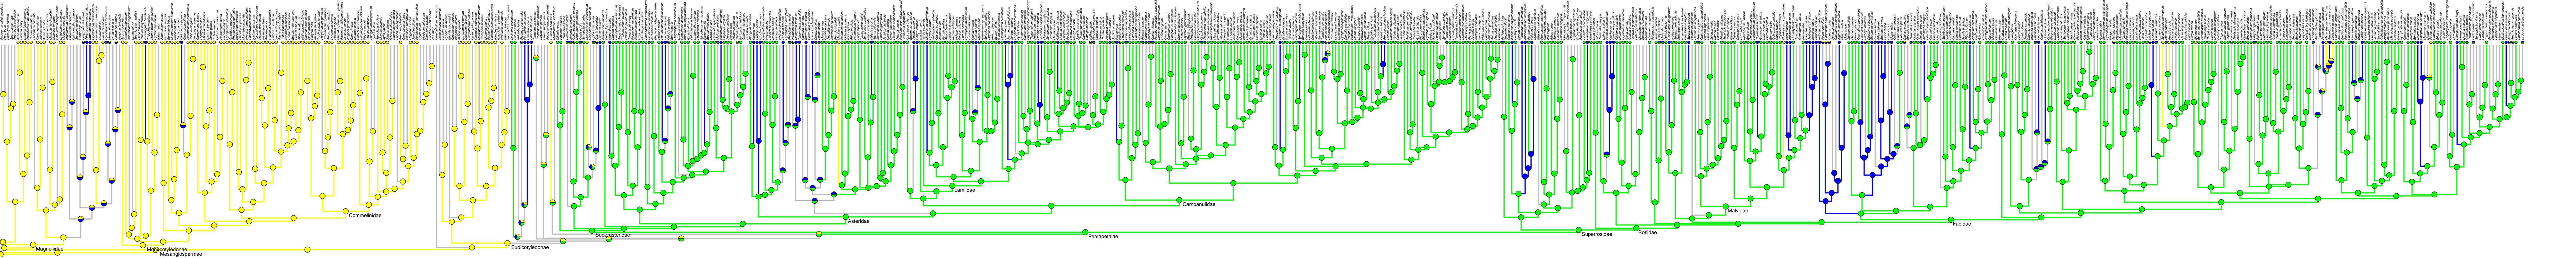



MP ancestral state reconstruction using ancestral.pars  
(R:phangorn)  
234\_A. Perianth differentiation (binary) (D2d), 63 steps

● undifferentiated  
● differentiated

- Node  
Angiospermae  
Mesangiospermae  
Magnoliidae  
Monocotyledonae  
Eudicotyledonae  
Commelinidae  
Pentapetalae  
Superasteridae  
Asteridae  
Lamiidae  
Campanulidae  
Superrosidae  
Rosidae  
Malvidae  
Fabidae

MP state(s)  
undifferentiated  
undifferentiated / differentiated  
undifferentiated  
undifferentiated  
undifferentiated  
differentiated  
differentiated  
differentiated  
differentiated  
differentiated  
differentiated  
differentiated

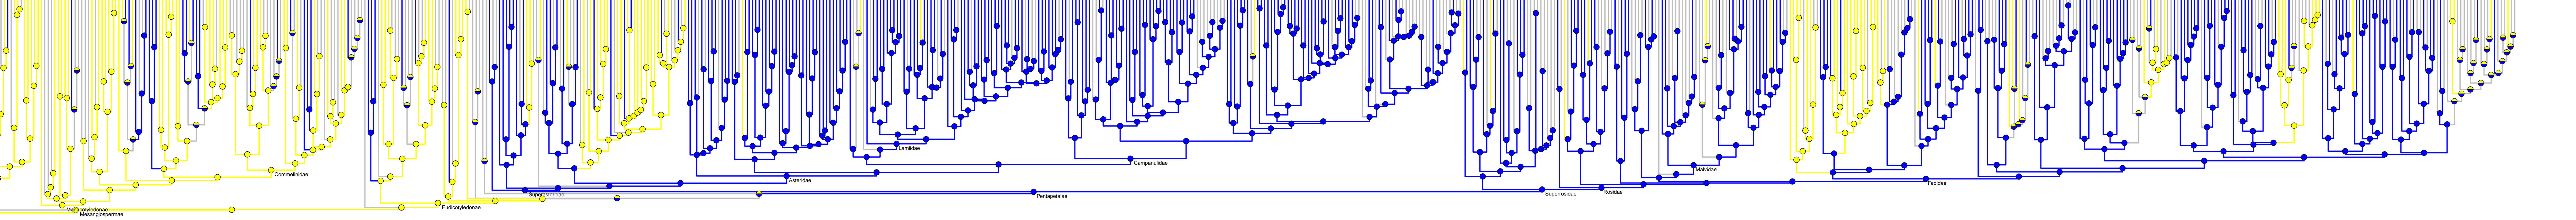

ML ancestral state reconstruction using rayDISC (R:corHMM)  
234\_A. Perianth differentiation (binary) (D2d), ARDeq model

● undifferentiated  
● differentiated

| Node            | ML state         | Prob   |
|-----------------|------------------|--------|
| Angiospermae    | undifferentiated | 1      |
| Mesangiospermae | undifferentiated | 0.9999 |
| Magnoliidae     | undifferentiated | 1      |
| Monocotyledonae | undifferentiated | 0.9899 |
| Eudicotyledonae | undifferentiated | 1      |
| Commelinidae    | undifferentiated | 0.9479 |
| Pentapetalae    | differentiated   | 0.9492 |
| Superasteridae  | differentiated   | 0.9982 |
| Asteridae       | differentiated   | 0.9999 |
| Lamiidae        | differentiated   | 1      |
| Campanulidae    | differentiated   | 0.9921 |
| Superrosidae    | differentiated   | 0.9953 |
| Rosidae         | differentiated   | 0.9989 |
| Malvidae        | differentiated   | 0.9872 |
| Fabidae         | differentiated   | 0.9872 |

| Model   | LogL    | Npar | AIC    | AICc   | DeltaAICc | w    | q01    | q10    |
|---------|---------|------|--------|--------|-----------|------|--------|--------|
| ARD     | -199.39 | 2    | 402.77 | 402.79 | 1.38      | 0.33 | 0.0045 | 0.0015 |
| ARDeq** | -198.69 | 2    | 401.39 | 401.4  | 0         | 0.67 | 0.0045 | 0.0015 |
| ER      | -208.5  | 1    | 419    | 419    | 17.6      | 0    | 0.0025 | 0.0025 |
| UNI01   | -225.54 | 1    | 453.09 | 453.09 | 51.69     | 0    | 0.0086 |        |
| UNI10   | -234.01 | 1    | 470.02 | 470.02 | 68.62     | 0    |        | 0.0034 |

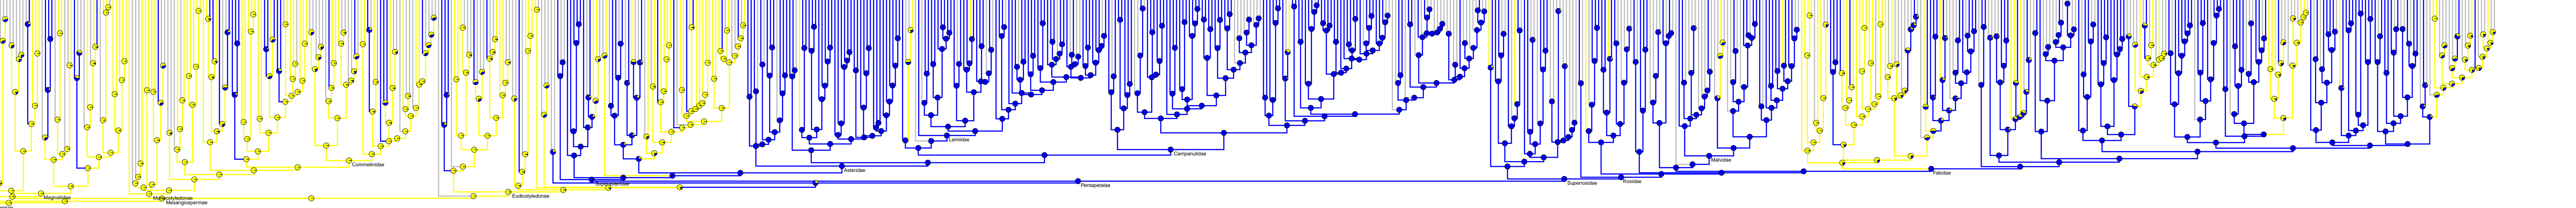

MP ancestral state reconstruction using ancestral.pars  
(R:phangorn)

204\_A. Fusion of perianth (D2c). 77 steps

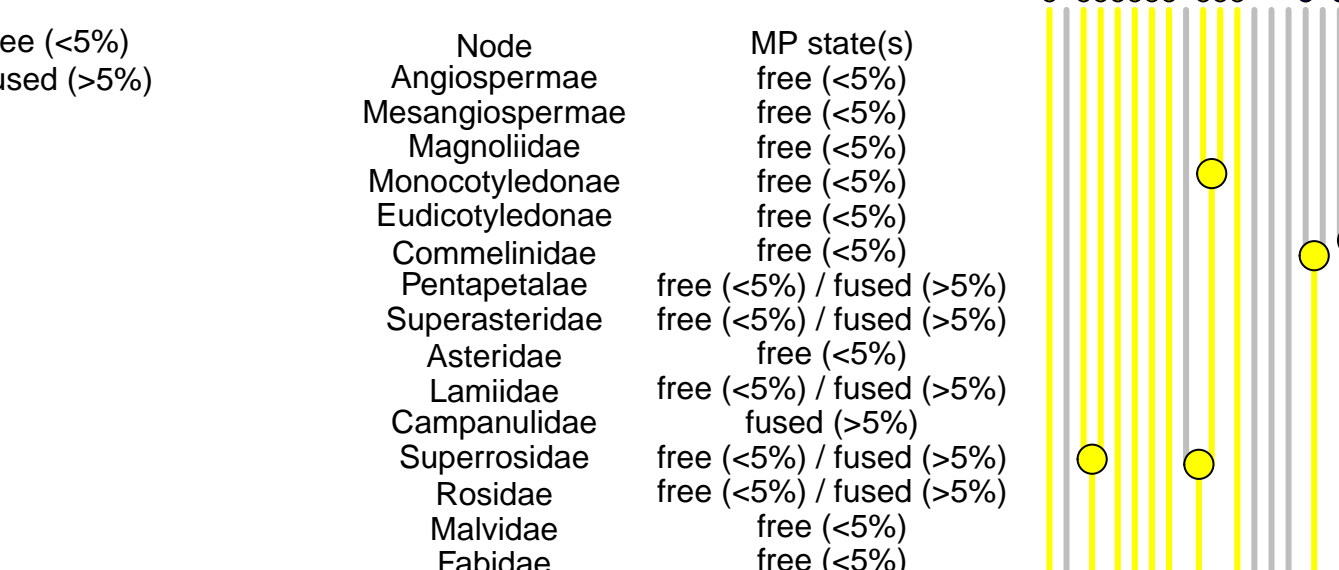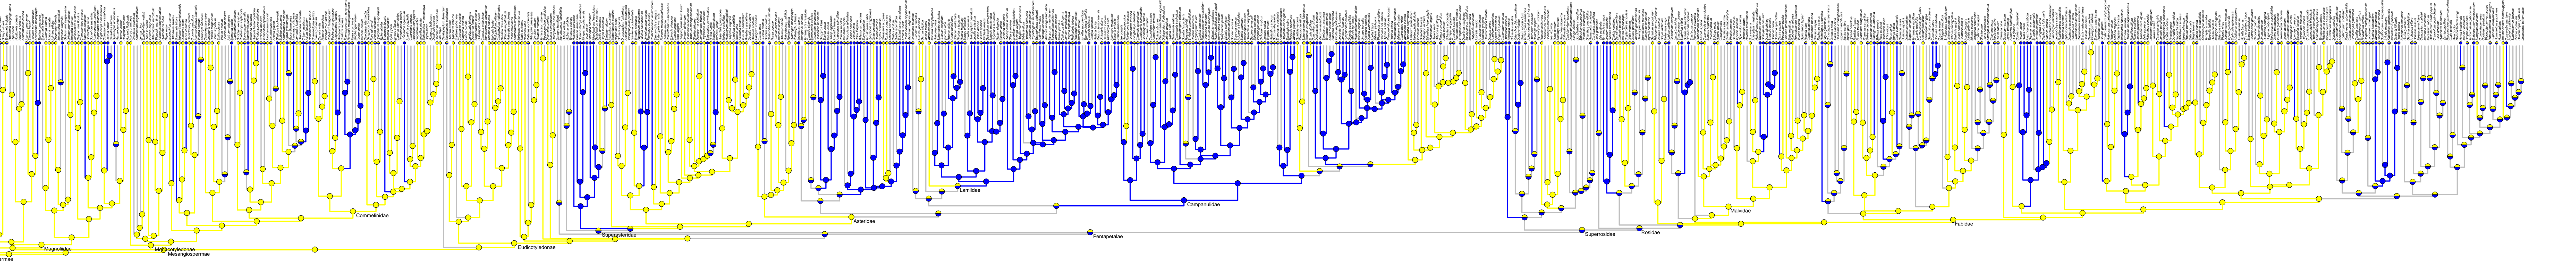



MP ancestral state reconstruction using ancestral.pars  
(R:phangorn)

207\_A. Symmetry of perianth (binary) (D2d), 55 steps

● actinomorphic  
● zygomorphic

| Node            | MP state(s)   |
|-----------------|---------------|
| Angiospermae    | actinomorphic |
| Mesangiospermae | actinomorphic |
| Magnoliidae     | actinomorphic |
| Monocotyledonae | actinomorphic |
| Eudicotyledonae | actinomorphic |
| Commelinidae    | actinomorphic |
| Pentapetalae    | actinomorphic |
| Superasteridae  | actinomorphic |
| Asteridae       | actinomorphic |
| Lamiidae        | actinomorphic |
| Campanulidae    | actinomorphic |
| Superrosidae    | actinomorphic |
| Rosidae         | actinomorphic |
| Malvidae        | actinomorphic |
| Fabidae         | actinomorphic |

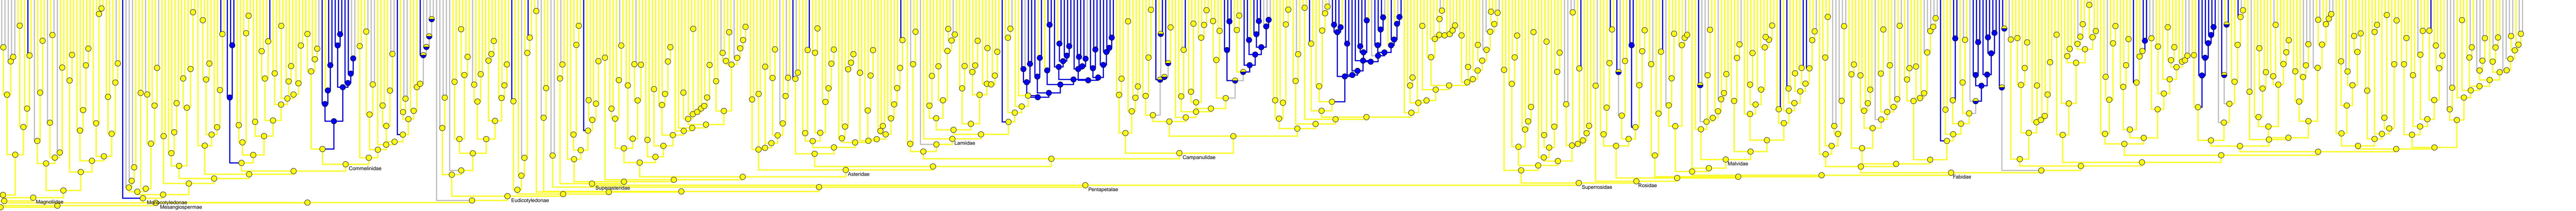

ML ancestral state reconstruction using rayDISC (R:corHMM)  
 207\_A. Symmetry of perianth (binary) (D2d), ARDeq model

● actinomorphic  
 ● zygomorphic

| Model   | LogL    | Npar | AIC     | AICc       | DeltaAICc  | w    | q01    | q10    |
|---------|---------|------|---------|------------|------------|------|--------|--------|
| ARD     | -211.59 | 2    | 427.17  | 427.19     | 1.37       | 0.33 | 0.0014 | 0.0062 |
| ARDeq** | -210.9  | 2    | 425.8   | 425.81     | 0          | 0.67 | 0.0014 | 0.0062 |
| ER      | -223.67 | 1    | 449.33  | 449.34     | 23.53      | 0    | 0.0019 | 0.0019 |
| UNI01   | -1e+06  | 1    | 2000002 | 2000002.01 | 1999576.19 | 0    | 0.0021 | 0      |
| UNI10   | -219.37 | 1    | 440.74  | 440.75     | 14.93      | 0    | 0.0167 | 0      |

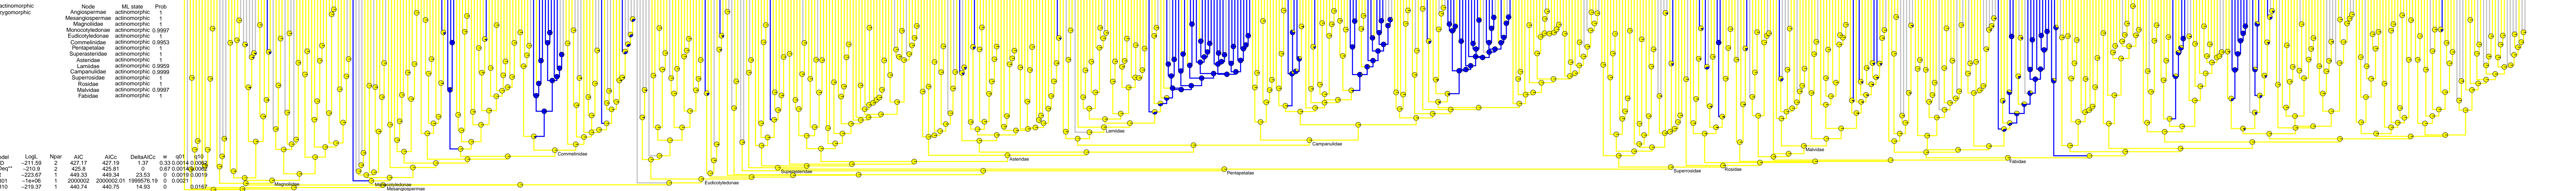

MP ancestral state reconstruction using ancestral.pars

(R:phangorn)

301\_B. Number of fertile stamens (3-state) (D2c), 156 steps

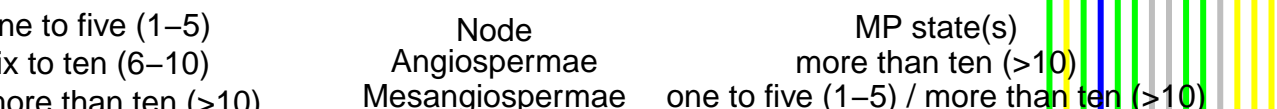

- Node
- Angiospermae
  - Mesangiospermae
  - Magnoliidae
  - Monocotyledonae
  - Eudicotyledonae
  - Commelinidae
  - Pentapetalae
  - Superasteridae
  - Asteridae
  - Lamiidae
  - Campanulidae
  - Superrosidae
  - Rosidae
  - Malvidae
  - Fabidae

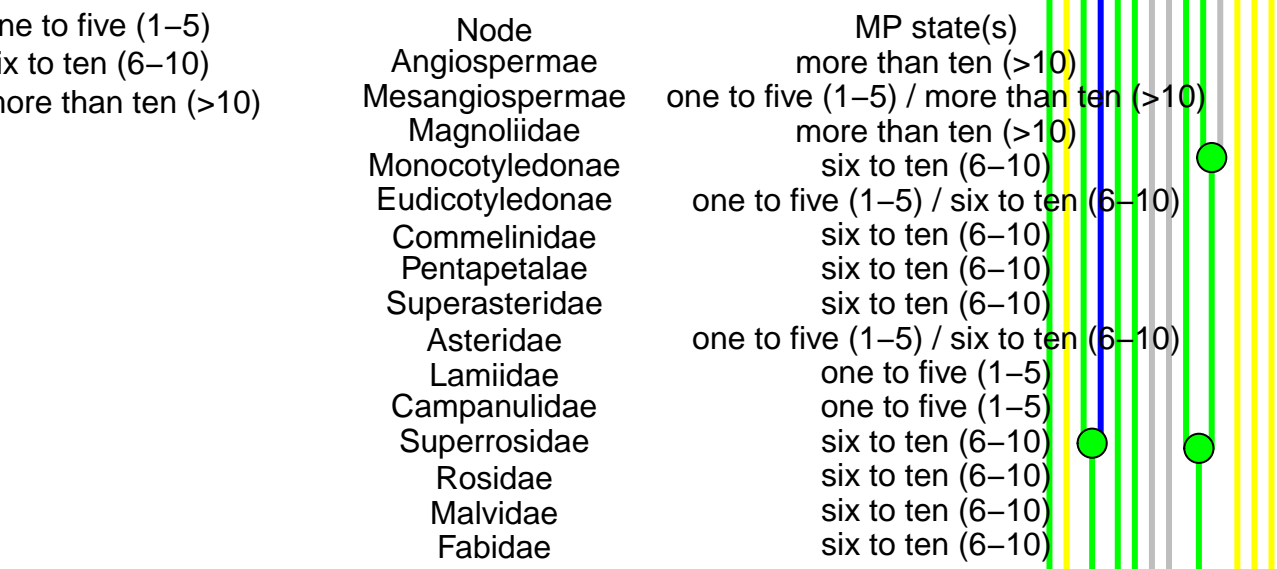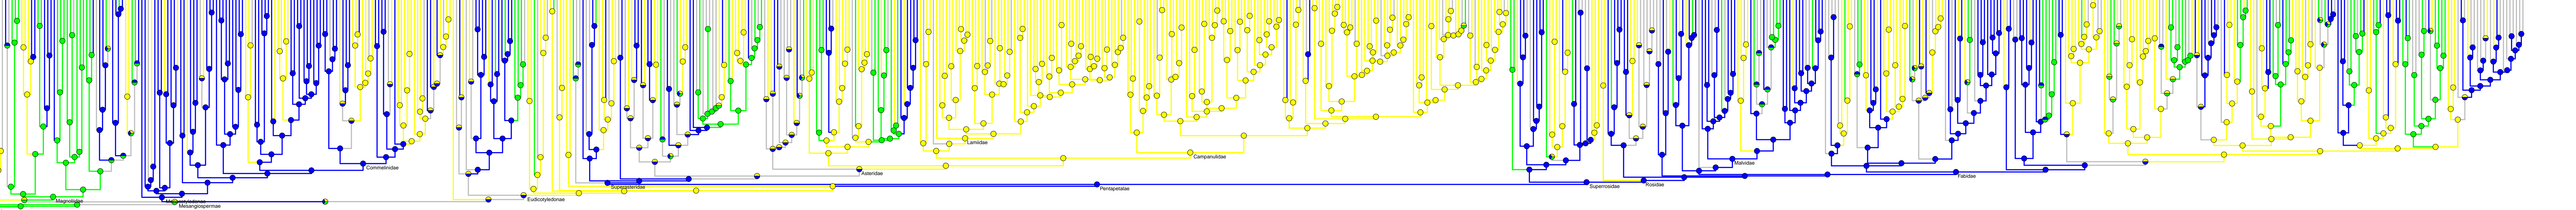



phangorn)

borella  
 unia si  
 enia s  
 omba  
 phae  
 thar ad  
 roba  
 enia n  
 um flo  
 sura j  
 sand  
 yosmu  
 erina  
 andra  
 andra

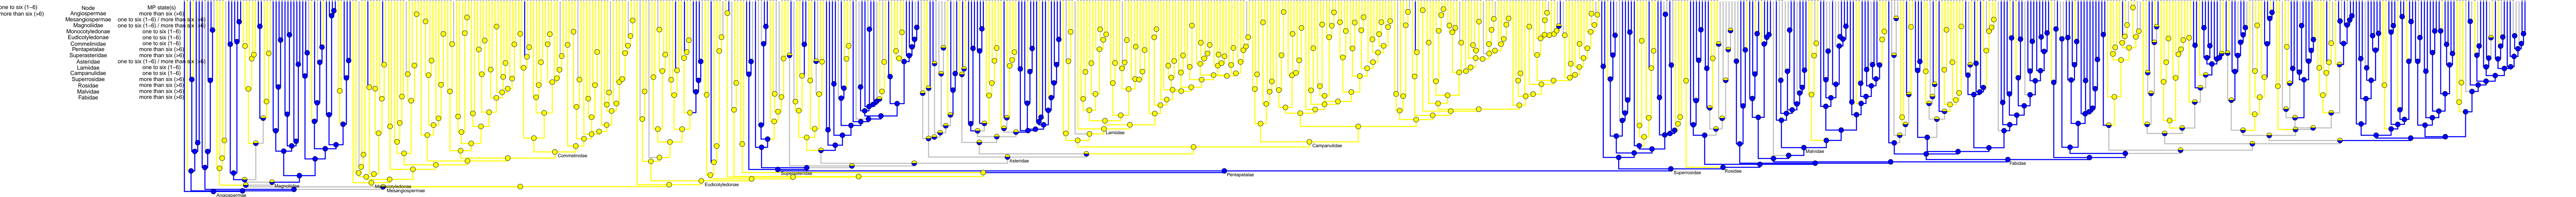

ML ancestral state reconstruction using rayDISC (R:corHMM)  
301\_C. Number of fertile stamens (binary) (D2c), ARDeq model

● one to six (1-6)  
● more than six (>6)

| Node            | ML state           | Prob   |
|-----------------|--------------------|--------|
| Angiospermae    | more than six (>6) | 1      |
| Mesangiospermae | more than six (>6) | 1      |
| Magnoliidae     | more than six (>6) | 1      |
| Monocotyledonae | more than six (>6) | 0.5725 |
| Eudicotyledonae | more than six (>6) | 0.9998 |
| Commelinidae    | one to six (1-6)   | 1      |
| Pentapetalae    | more than six (>6) | 1      |
| Superasteridae  | more than six (>6) | 1      |
| Asteridae       | more than six (>6) | 0.9999 |
| Lamiidae        | one to six (1-6)   | 0.9987 |
| Campanulidae    | one to six (1-6)   | 0.9926 |
| Superrosidae    | more than six (>6) | 1      |
| Rosidae         | more than six (>6) | 1      |
| Malvidae        | more than six (>6) | 1      |
| Fabidae         | more than six (>6) | 1      |

| Model   | LogL    | Npar | AIC    | AICc   | DeltaAICc | w    | q01    | q10    |
|---------|---------|------|--------|--------|-----------|------|--------|--------|
| ARD     | -288.16 | 2    | 580.33 | 580.34 | 1.39      | 0.33 | 5e-04  | 0.0059 |
| ARDeq** | -287.47 | 2    | 578.94 | 578.96 | 0         | 0.67 | 5e-04  | 0.0059 |
| ER      | -323.09 | 1    | 648.19 | 648.19 | 69.24     | 0    | 0.0031 | 0.0031 |
| UNI01   | -362.46 | 1    | 726.93 | 726.93 | 147.98    | 0    | 0.0046 |        |
| UNI10   | -327.51 | 1    | 657.02 | 657.02 | 78.07     | 0    | 0.0074 |        |

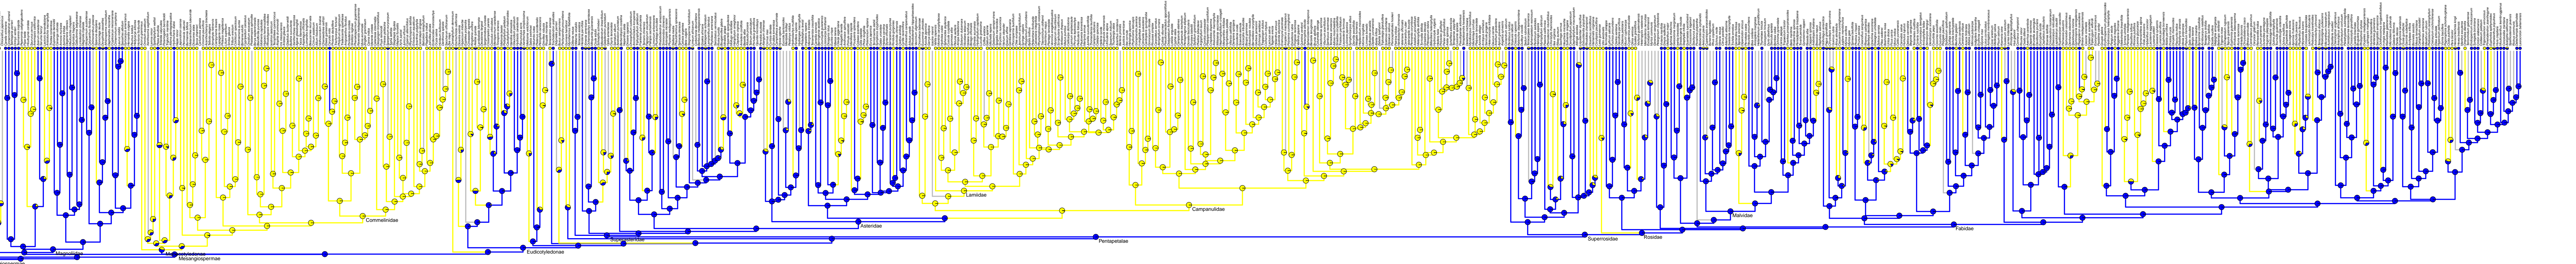

MP ancestral state reconstruction using ancestral.pars  
(R:phangorn)  
330\_A. Androecium structural phyllotaxy (binary) (D2d), 12 steps

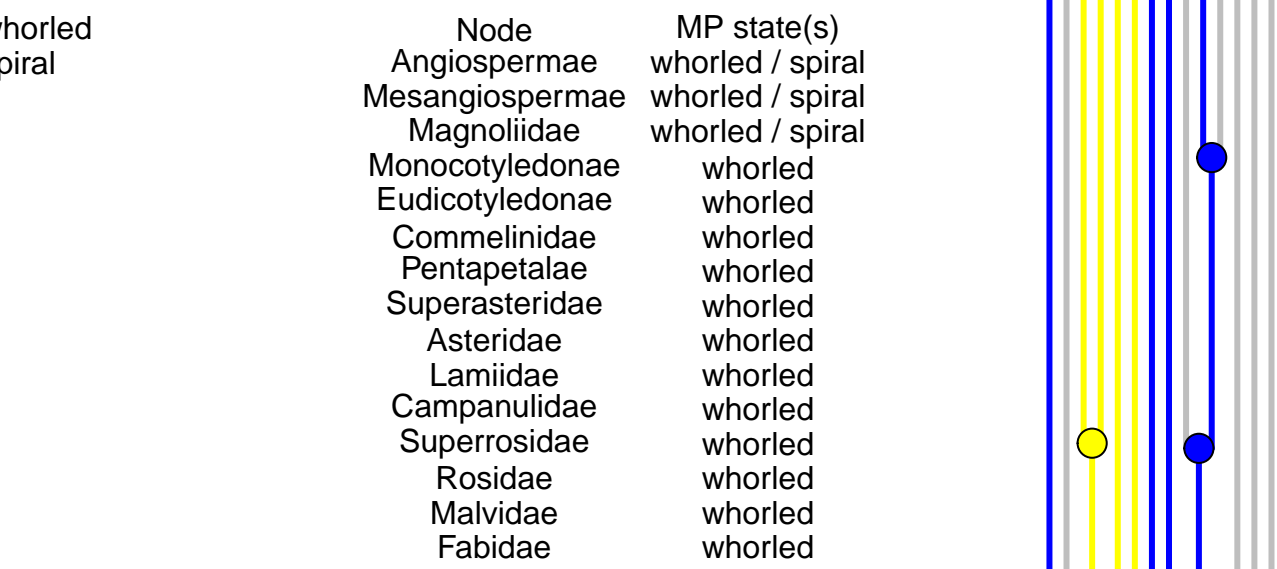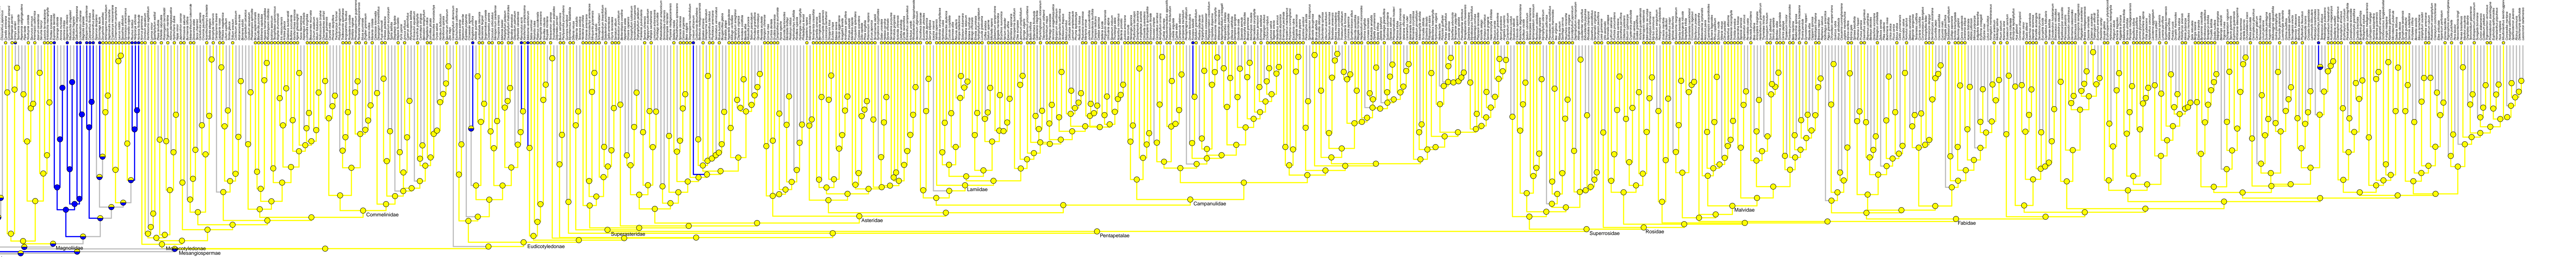

ML ancestral state reconstruction using rayDISC (R:corHMM)  
330\_A. Androecium structural phylotaxy (binary) (D2d), UNI01 model

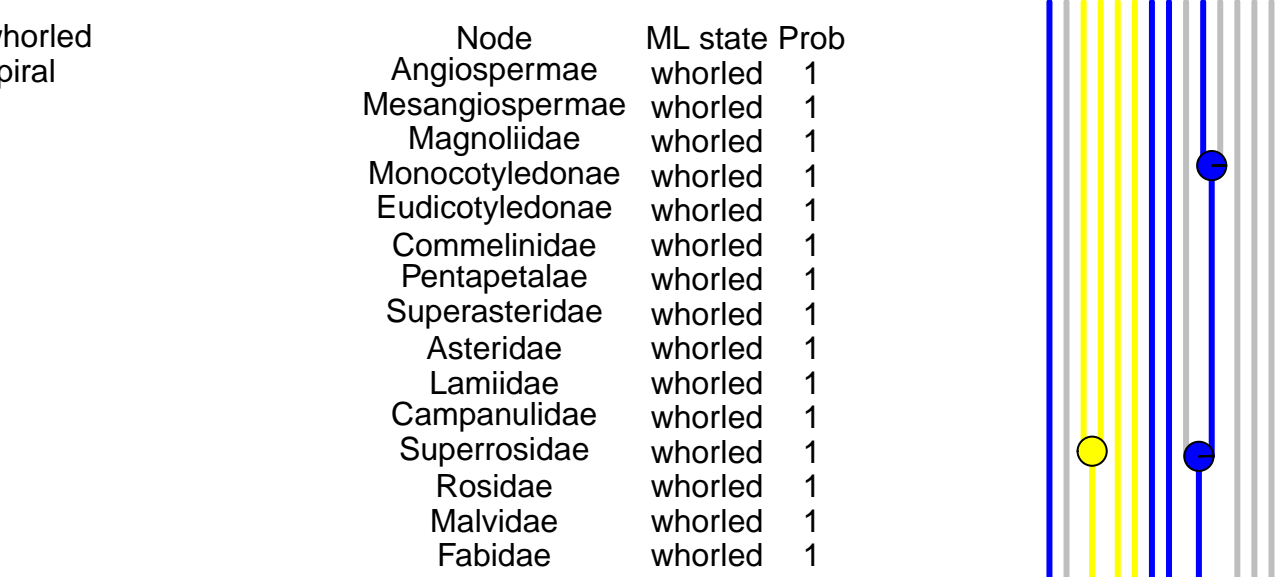

| Model  | LogL   | Npar | AIC    | AICc   | DeltaAICc | w    | q01   | q10    |
|--------|--------|------|--------|--------|-----------|------|-------|--------|
| ARD    | -60.11 | 2    | 124.23 | 124.24 | 2.01      | 0.13 | 4e-04 | 0      |
| ARDeq  | -59.42 | 2    | 122.84 | 122.86 | 0.62      | 0.25 | 4e-04 | 0      |
| ER     | -60.36 | 1    | 122.73 | 122.73 | 0.5       | 0.27 | 4e-04 | 4e-04  |
| UNI01* | -60.11 | 1    | 122.23 | 122.23 | 0         | 0.35 | 4e-04 | 0      |
| UNI01  | -76.39 | 1    | 154.79 | 154.79 | 32.56     | 0    |       | 0.0209 |

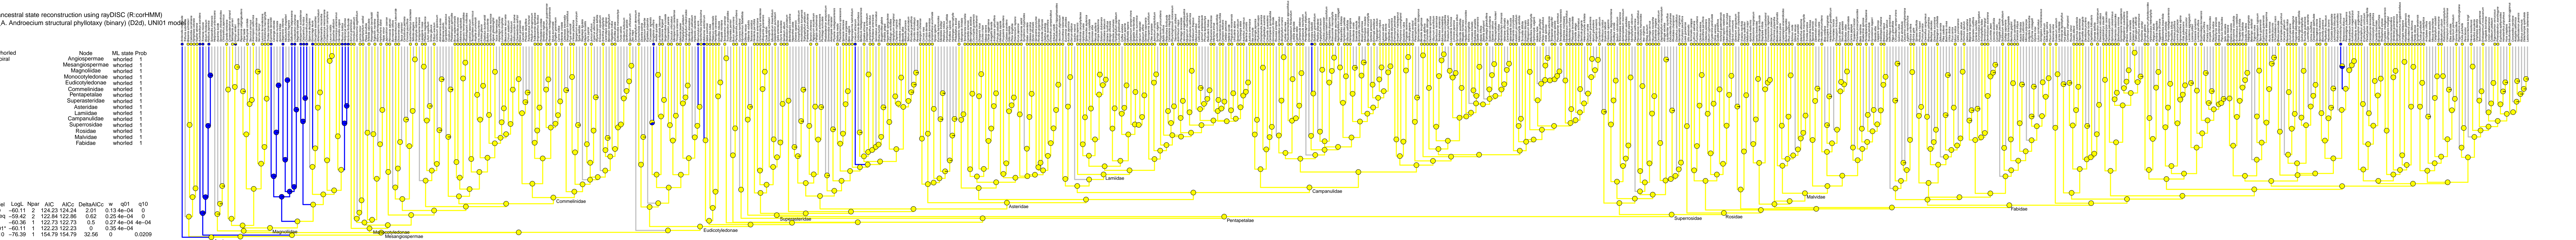

en

phangorn)

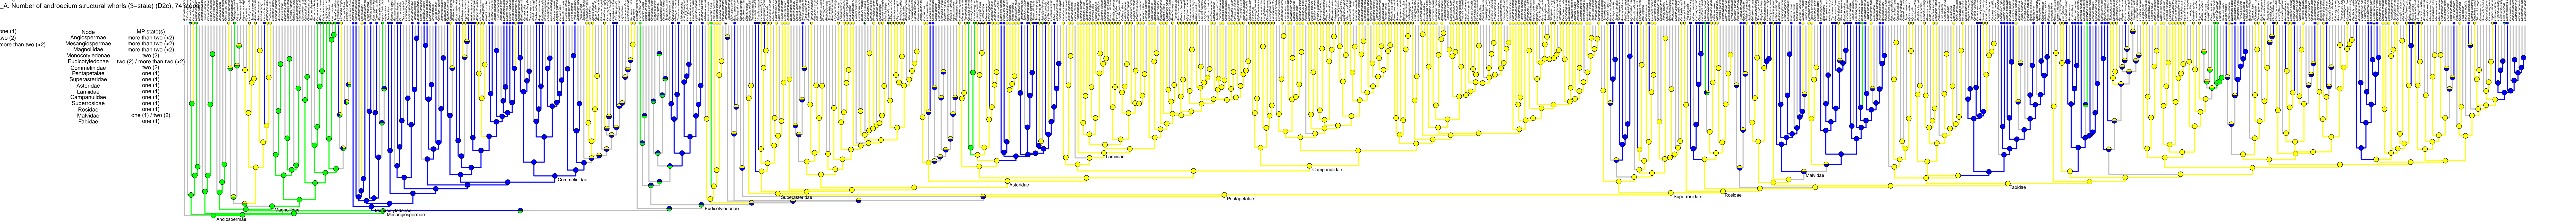

ML ancestral state reconstruction using rayDISC (R:corHMM)

331\_A. Number of androecium structural whorls (3-state) (D2c), ORDER model

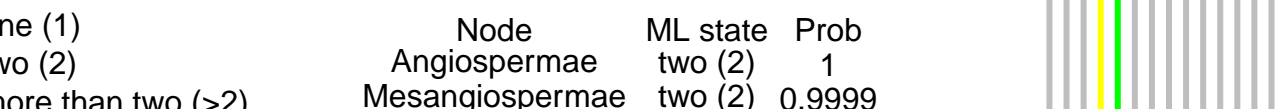

| Node            | ML state | Prob   |
|-----------------|----------|--------|
| Angiospermae    | two (2)  | 1      |
| Mesangiospermae | two (2)  | 0.9999 |
| Magnoliidae     | two (2)  | 0.9917 |
| Monocotyledonae | two (2)  | 1      |
| Eudicotyledonae | two (2)  | 1      |
| Commelinidae    | two (2)  | 1      |
| Pentapetalae    | two (2)  | 1      |
| Superasteridae  | two (2)  | 1      |
| Asteridae       | two (2)  | 1      |
| Lamiidae        | one (1)  | 0.9986 |
| Campanulidae    | one (1)  | 0.9916 |
| Superrosidae    | two (2)  | 1      |
| Rosidae         | two (2)  | 1      |
| Malvidae        | two (2)  | 1      |
| Fabidae         | two (2)  | 1      |

| Model    | LogL    | Npar | AIC    | AICc   | DeltaAICc | w    | q01    | ... |
|----------|---------|------|--------|--------|-----------|------|--------|-----|
| ARD      | -230.47 | 6    | 472.95 | 473.06 | 0.19      | 0.32 | 0      | ... |
| ARDeq    | -230.91 | 6    | 473.82 | 473.92 | 1.06      | 0.21 | 0      | ... |
| ER       | -280.24 | 1    | 562.49 | 562.49 | 89.63     | 0    | 0.0017 | ... |
| SYM      | -254.21 | 3    | 514.43 | 514.46 | 41.59     | 0    | 0.0035 | ... |
| SYMeq    | -253.16 | 3    | 512.33 | 512.36 | 39.49     | 0    | 0.0035 | ... |
| ORD      | -233.46 | 4    | 474.93 | 474.98 | 2.11      | 0.12 | 0      | ... |
| ORDeq*   | -232.41 | 4    | 472.82 | 472.87 | 0         | 0.35 | 0      | ... |
| ORDSYM   | -255.12 | 2    | 514.24 | 514.26 | 41.39     | 0    | 0.0036 | ... |
| ORDSYMeq | -254.05 | 2    | 512.09 | 512.11 | 39.24     | 0    | 0.0036 | ... |
| ORDER    | -260.45 | 1    | 522.9  | 522.9  | 50.04     | 0    | 0.0029 | ... |

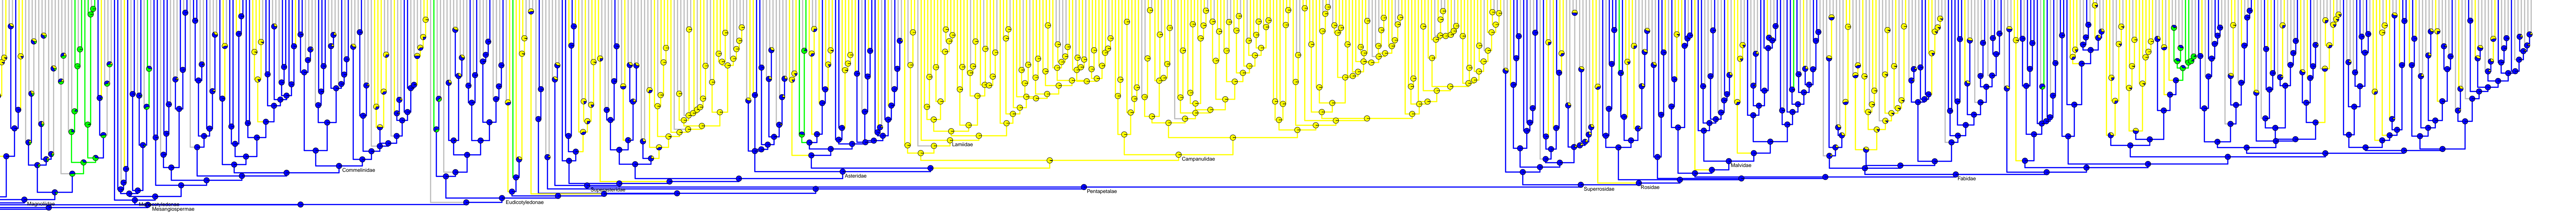

MP ancestral state reconstruction using ancestral.pars  
(R:phangorn)

332\_A. Androecium structural merism (4-state) (D2c), 58 steps

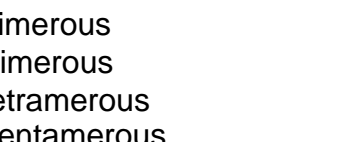

- Node
- Angiospermae
  - Mesangiospermae
  - Magnoliidae
  - Monocotyledonae
  - Eudicotyledonae
  - Commelinidae
  - Pentapetalae
  - Superasteridae
  - Asteridae
  - Lamiidae
  - Campanulidae
  - Superrosidae
  - Rosidae
  - Malvidae
  - Fabidae

MP state(s)

- trimerous
- trimerous
- trimerous
- trimerous
- trimerous
- trimerous / tetramerous / pentamerous
- trimerous
- pentamerous

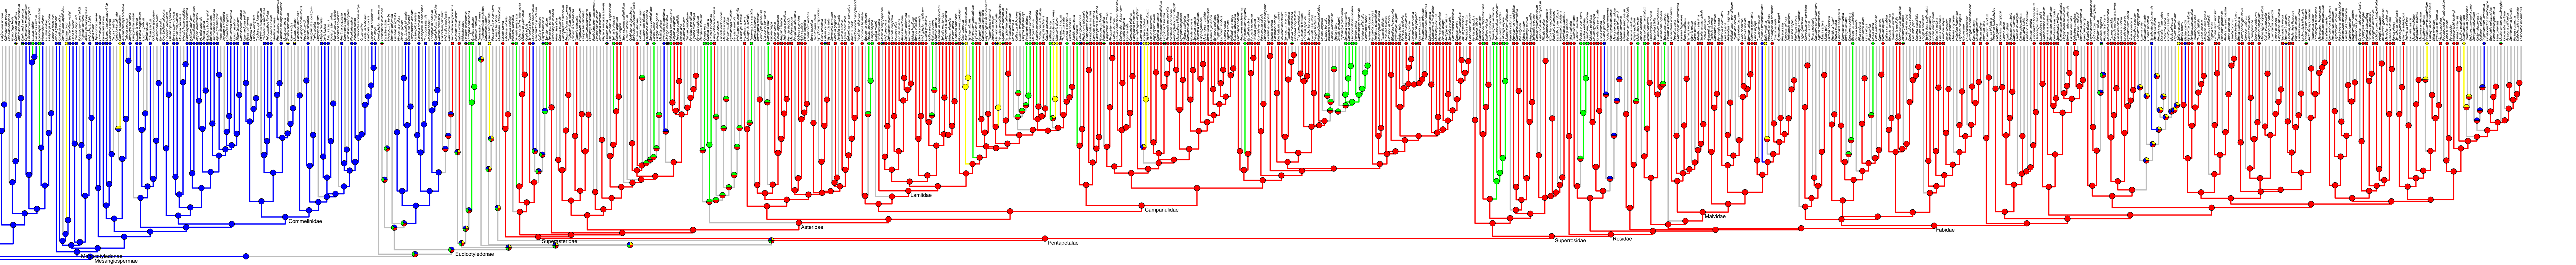

ML ancestral state reconstruction using rayDISC (R:corHMM)

332\_A. Androecium structural merism (4-state) (D2c), ORDeq model

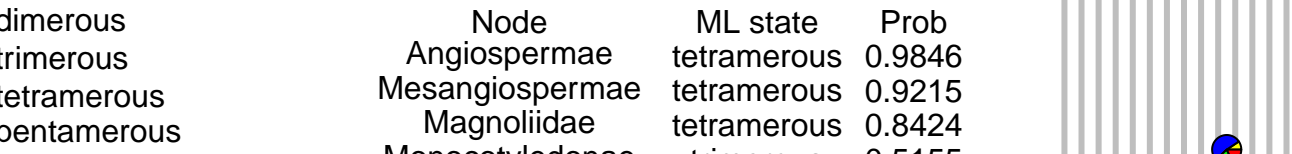

| Model   | LogL    | Npar | AIC    | AICc   | DeltaAICc | w    | q01    | ... |
|---------|---------|------|--------|--------|-----------|------|--------|-----|
| ARD     | -222.8  | 12   | 469.59 | 469.99 | 348.76    | 0    | 0.0071 | ... |
| ARDeq   | -221.46 | 12   | 466.92 | 467.32 | 346.09    | 0    | 0.0069 | ... |
| ER      | -236.77 | 1    | 475.53 | 475.54 | 354.3     | 0    | 9e-04  | ... |
| SYM     | -224.73 | 6    | 461.47 | 461.58 | 340.34    | 0    | 6e-04  | ... |
| SYMeq   | -223.36 | 6    | 458.72 | 458.82 | 337.59    | 0    | 6e-04  | ... |
| ORD     | -56.67  | 6    | 125.34 | 125.44 | 4.21      | 0.11 | 99.998 | ... |
| ORDSY** | -54.56  | 6    | 121.13 | 121.24 | 0         | 0.89 | 100    | ... |
| ORDSYM  | -256.73 | 3    | 519.46 | 519.49 | 398.26    | 0    | 0.0021 | ... |
| ORDSYMq | -255.4  | 3    | 516.8  | 516.83 | 395.59    | 0    | 0.0021 | ... |
| ORDER   | -257.49 | 1    | 516.97 | 516.98 | 395.74    | 0    | 0.0031 | ... |

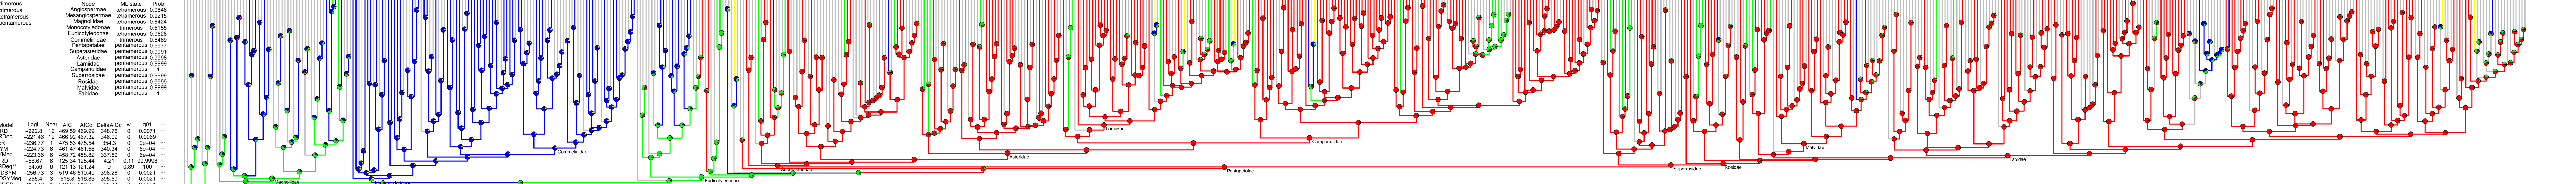

MP ancestral state reconstruction using ancestral.pars

(R:phangorn)

332\_B. Androecium structural merism (3-state) (D2c), 49 steps

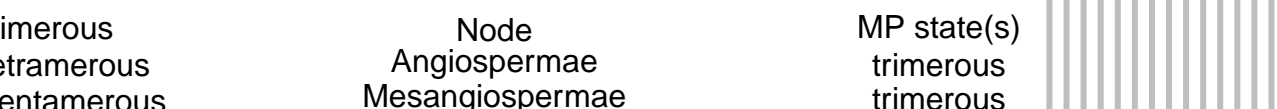

- Node
- Angiospermae
- Mesangiospermae
- Magnoliidae
- Monocotyledonae
- Eudicotyledonae
- Commelinidae
- Pentapetalae
- Superasteridae
- Asteridae
- Lamiidae
- Campanulidae
- Superrosidae
- Rosidae
- Malvidae
- Fabidae

MP state(s)

trimerous / tetramerous / pentamerous

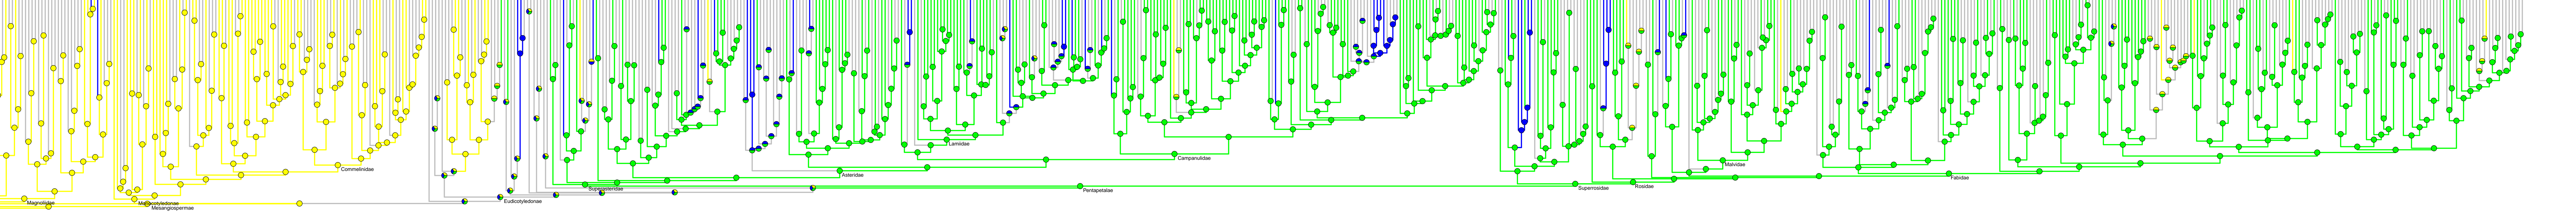

32. B. Andreuccio structural merism (3 states) (D3e). SYM<sub>3</sub> mod

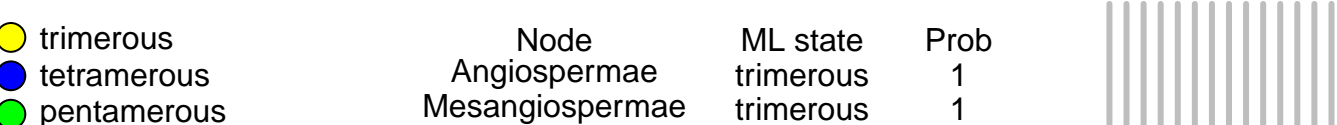

|               | Node            | ML state    | Prob   |
|---------------|-----------------|-------------|--------|
| ● trimerous   | Angiospermae    | trimerous   | 1      |
| ● tetramerous | Mesangiospermae | trimerous   | 1      |
| ● pentamerous | Magnoliidae     | trimerous   | 1      |
|               | Monocotyledonae | trimerous   | 1      |
|               | Eudicotyledonae | trimerous   | 0.8422 |
|               | Commelinidae    | trimerous   | 1      |
|               | Pentapetalae    | pentamerous | 0.9999 |
|               | Superasteridae  | pentamerous | 1      |
|               | Asteridae       | pentamerous | 0.9996 |
|               | Lamiidae        | pentamerous | 0.9999 |
|               | Campanulidae    | pentamerous | 1      |
|               | Superrosidae    | pentamerous | 1      |
|               | Rosidae         | pentamerous | 1      |
|               | Malvidae        | pentamerous | 1      |
|               | Fabidae         | pentamerous | 1      |

| Model    | LogL    | Npar | AIC    | AICc   | DeltaAIC | w    | q01    | ... |
|----------|---------|------|--------|--------|----------|------|--------|-----|
| ARD      | -176.73 | 6    | 365.46 | 365.57 | 7.87     | 0.01 | 5e-04  | ... |
| ARDeq    | -175.64 | 6    | 363.28 | 363.38 | 5.69     | 0.04 | 5e-04  | ... |
| ER       | -185.95 | 1    | 373.9  | 373.91 | 16.21    | 0    | 0.0011 | ... |
| SYM      | -176.92 | 3    | 359.85 | 359.88 | 2.18     | 0.22 | 5e-04  | ... |
| SYMeq**  | -175.83 | 3    | 357.66 | 357.69 | 0        | 0.65 | 5e-04  | ... |
| ORD      | -178.34 | 4    | 364.69 | 364.74 | 7.05     | 0.02 | 1e-04  | ... |
| ORDeq    | -177.27 | 4    | 362.54 | 362.59 | 4.9      | 0.06 | 1e-04  | ... |
| ORDSYM   | -185.89 | 2    | 375.78 | 375.79 | 18.1     | 0    | 0.002  | ... |
| ORDSYMeq | -184.81 | 2    | 373.62 | 373.64 | 15.94    | 0    | 0.002  | ... |
| ORDER    | -186.63 | 1    | 375.25 | 375.26 | 17.56    | 0    | 0.0027 | ... |

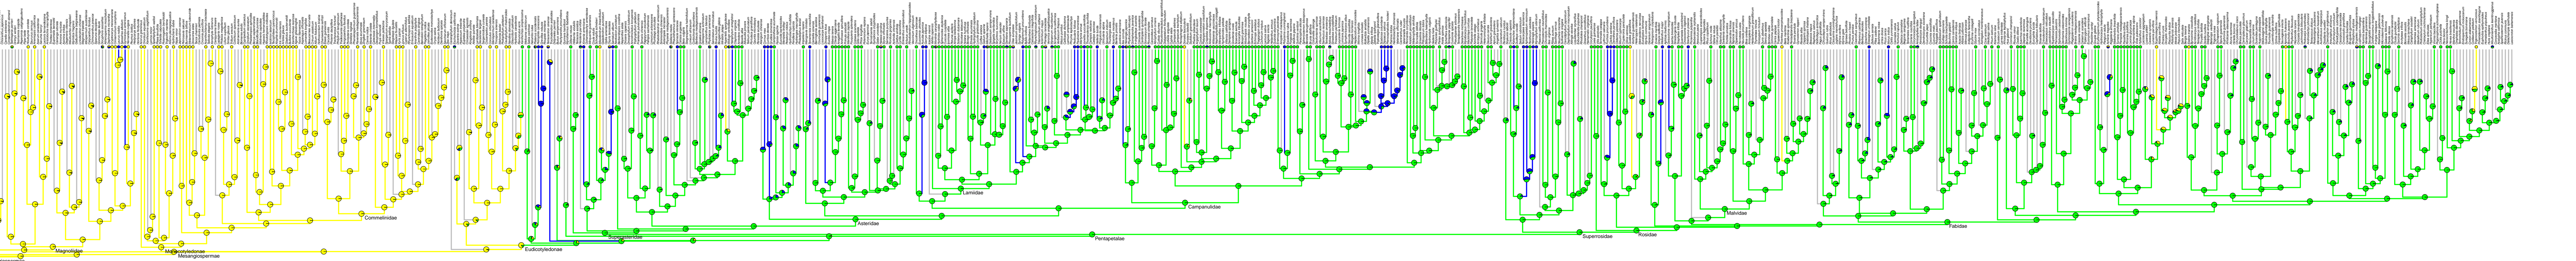

MP ancestral state reconstruction using ancestral.pars  
(R:phangorn)  
305\_A. Filament (binary) (D2d2), 52 steps

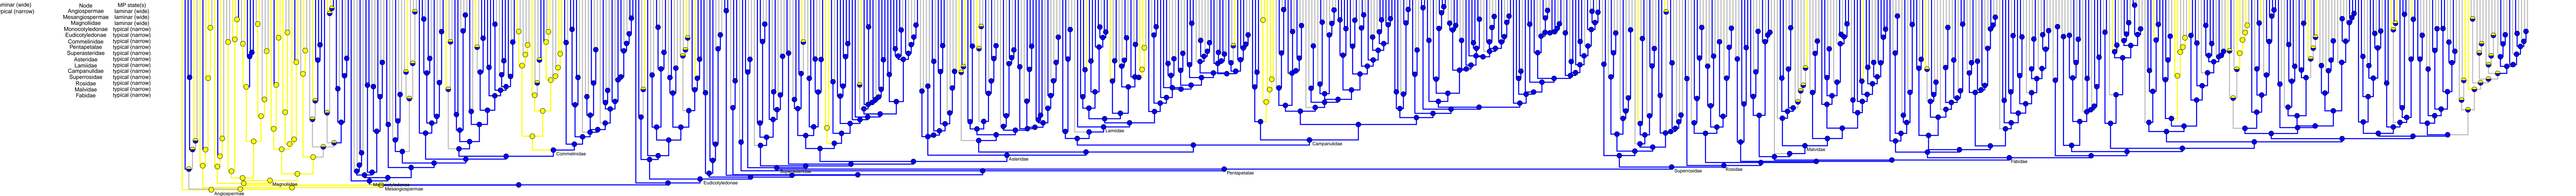

ML ancestral state reconstruction using rayDISC (R:corHMM)  
305\_A. Filament (binary) (D2d), ARDeq model

● laminar (wide)  
● typical (narrow)

| Node            | ML state         | Prob   |
|-----------------|------------------|--------|
| Angiospermae    | laminar (wide)   | 0.9999 |
| Mesangiospermae | laminar (wide)   | 0.9854 |
| Magnoliidae     | laminar (wide)   | 0.9976 |
| Monocotyledonae | laminar (wide)   | 0.564  |
| Eudicotyledonae | typical (narrow) | 0.7744 |
| Commelinidae    | typical (narrow) | 0.6606 |
| Pentapetalae    | typical (narrow) | 0.9996 |
| Superasteridae  | typical (narrow) | 0.9997 |
| Asteridae       | typical (narrow) | 0.9998 |
| Lamiidae        | typical (narrow) | 0.9985 |
| Campanulidae    | typical (narrow) | 0.9952 |
| Superrosidae    | typical (narrow) | 0.9998 |
| Rosidae         | typical (narrow) | 0.9998 |
| Malvidae        | typical (narrow) | 0.9979 |
| Fabidae         | typical (narrow) | 1      |

| Model   | LogL    | Npar | AIC    | AICc   | DeltaAICc | w    | q01    | q10    |
|---------|---------|------|--------|--------|-----------|------|--------|--------|
| ARD     | -172.12 | 2    | 348.25 | 348.26 | 1.2       | 0.35 | 0.008  | 0.0021 |
| ARDeq** | -171.52 | 2    | 347.04 | 347.06 | 0         | 0.64 | 0.002  | 0.0021 |
| ER      | -178.09 | 1    | 358.18 | 358.19 | 11.13     | 0    | 0.0024 | 0.0024 |
| UNI01   | -183.16 | 1    | 368.33 | 368.33 | 21.27     | 0    | 0.0147 |        |
| UNI10   | -188.67 | 1    | 379.34 | 379.35 | 32.29     | 0    |        | 0.0023 |

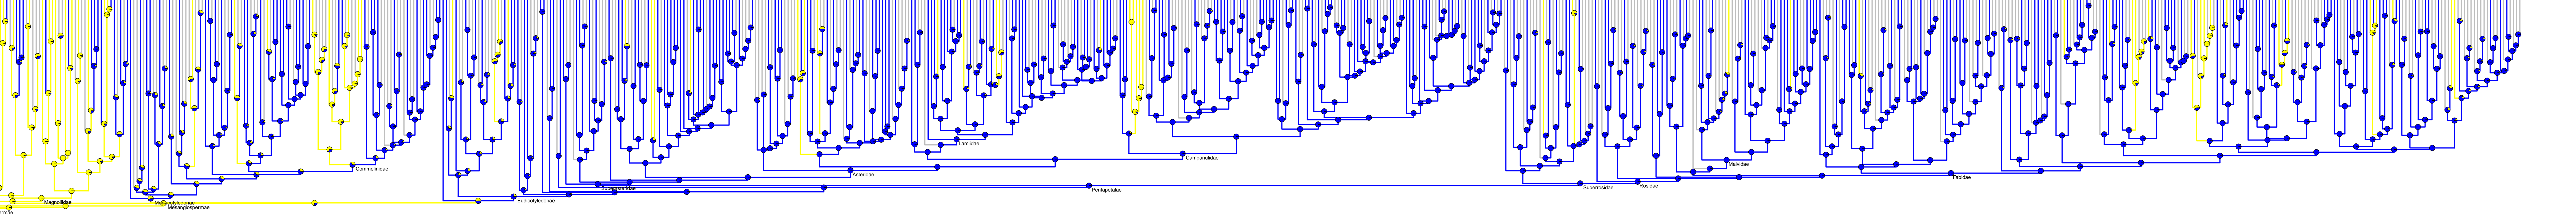

MP ancestral state reconstruction using ancestral.pars  
(R:phangorn)  
311\_A. Anther orientation (D2d), 108 steps

● introrse  
● latorse  
● extrorse

Node MP state(s)  
Angiospermae introrse / extrorse  
Mesangiospermae introrse / extrorse  
Magnoliidae introrse / extrorse  
Monocotyledonae introrse / extrorse  
Eudicotyledonae introrse / extrorse  
Commelinidae introrse / extrorse  
Pentapetalae introrse / extrorse  
Superasteridae introrse / extrorse  
Asteridae introrse / extrorse  
Lamiidae introrse / extrorse  
Campanulidae introrse / extrorse  
Superrosidae introrse / extrorse  
Rosidae introrse / extrorse  
Malvidae introrse / extrorse  
Fabidae introrse / extrorse

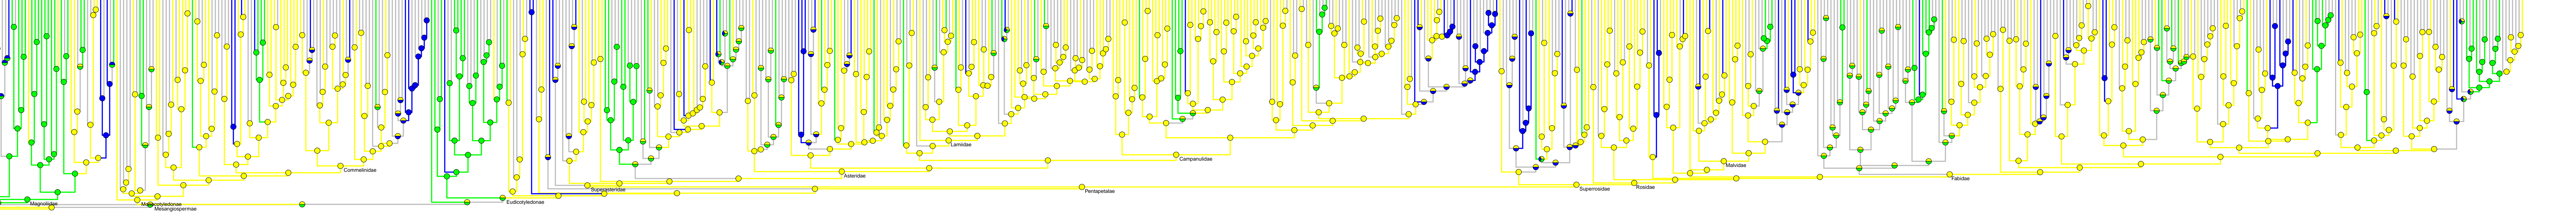

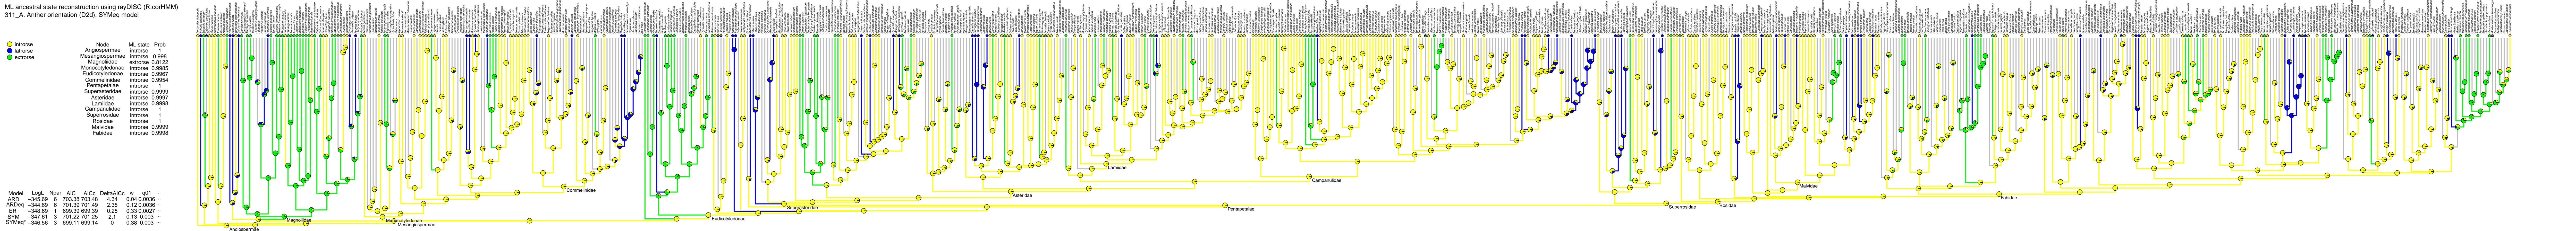





MP ancestral state reconstruction using ancestral.pars  
(R:phangorn)  
313\_A. Anther dehiscence (3-state) (D2d), 10 steps

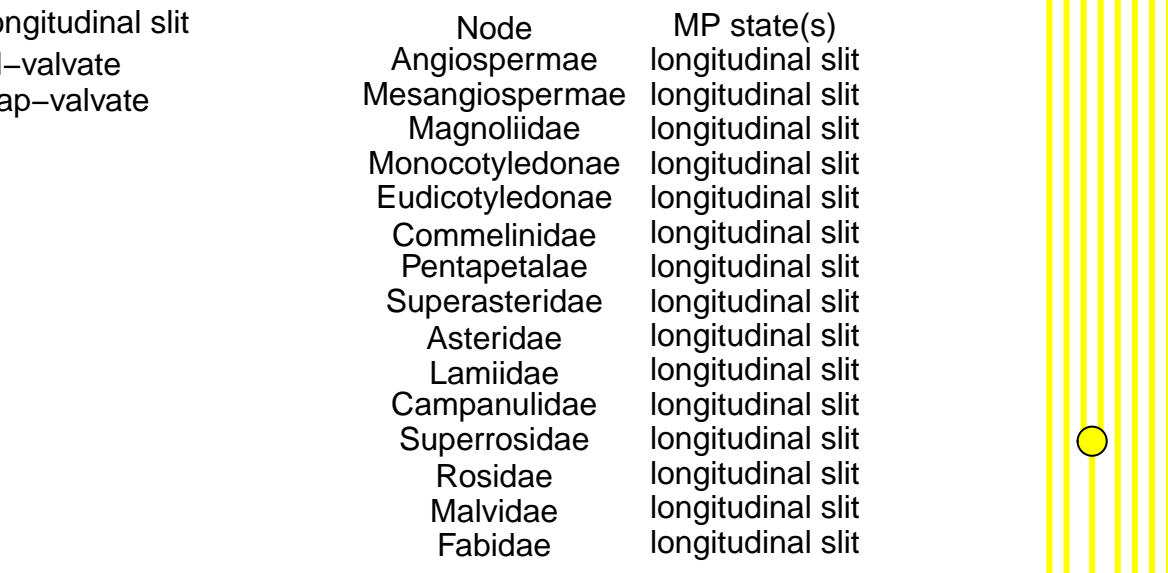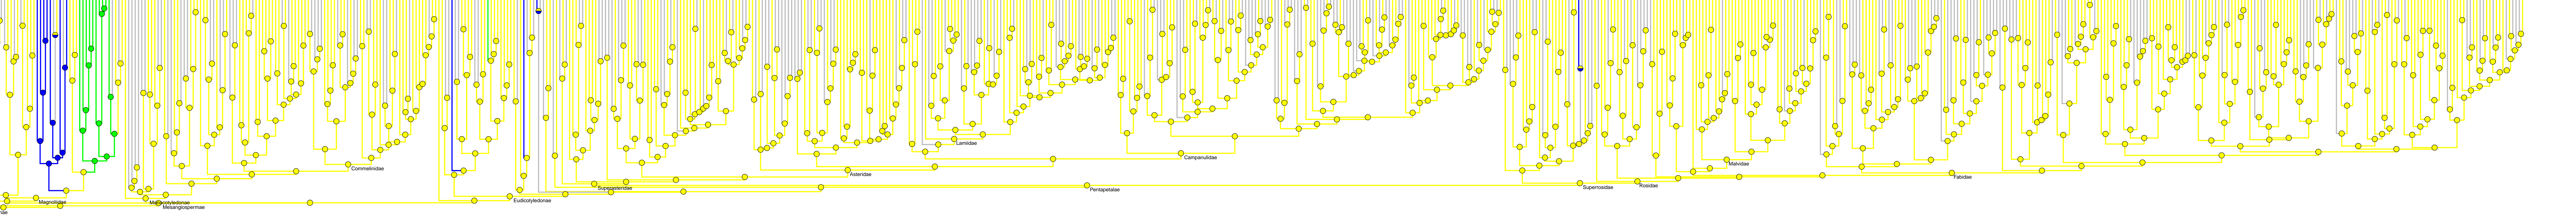

ML ancestral state reconstruction using rayDISC (R:corHMM)

313\_A. Anther dehiscence (3-state) (D2d), ARDeq model

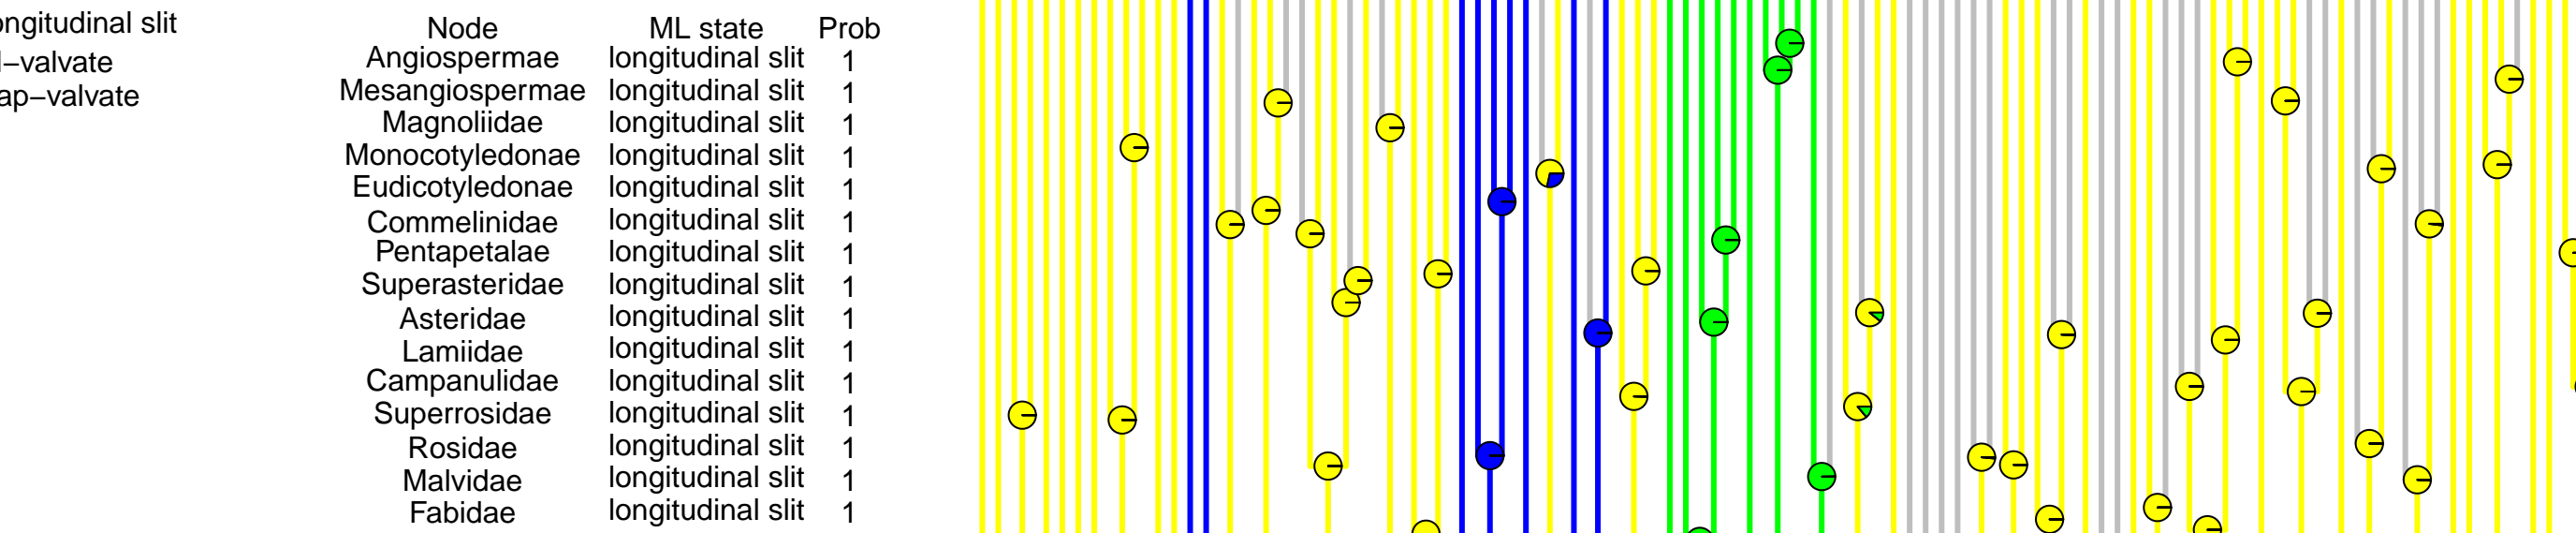

| Model  | LogL   | Npar | AIC    | AICc   | DeltaAICc | w    | q01   | ... |
|--------|--------|------|--------|--------|-----------|------|-------|-----|
| ARD    | -56.51 | 6    | 125.03 | 125.13 | 2.2       | 0.11 | 2e-04 | ... |
| ARDeq* | -55.41 | 6    | 122.83 | 122.94 | 0         | 0.32 | 2e-04 | ... |
| ER     | -60.8  | 1    | 123.6  | 123.61 | 0.67      | 0.23 | 2e-04 | ... |
| SYM    | -59.75 | 3    | 125.51 | 125.54 | 2.6       | 0.09 | 2e-04 | ... |
| SYMq   | -58.65 | 3    | 123.31 | 123.34 | 0.4       | 0.26 | 2e-04 | ... |

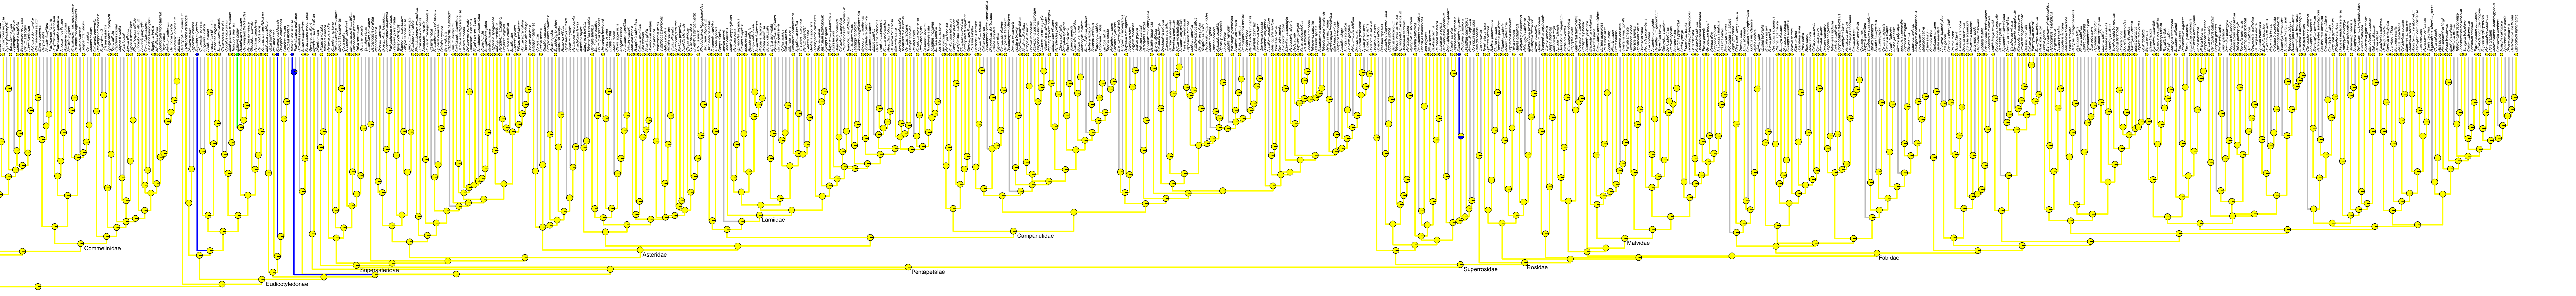

MP ancestral state reconstruction using ancestral.pars

(R:phangorn)

401\_B. Number of structural carpels (5-state) (D2c), 188 steps

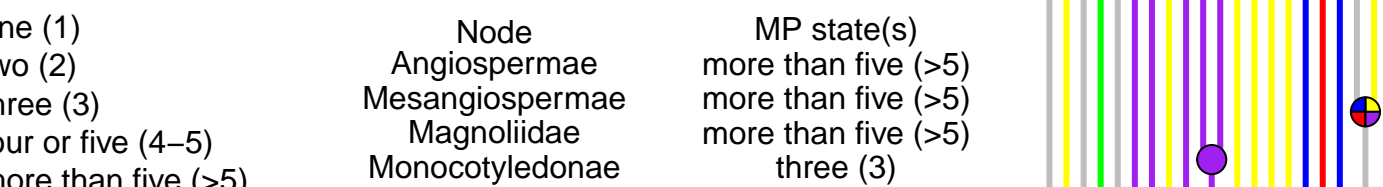

Node  
Angiospermae  
Mesangiospermae  
Magnoliidae  
Monocotyledonae  
Eudicotyledonae  
Commelinidae  
Pentapetalae  
Superasteridae  
Asteridae  
Lamiidae  
Campanulidae  
Superrosidae  
Rosidae  
Malvidae  
Fabidae

MP state(s)  
more than five (>5)  
more than five (>5)  
more than five (>5)  
three (3)  
more than five (>5)  
three (3)  
four or five (4-5)  
four or five (4-5)  
two (2) / four or five (4-5)  
two (2)  
two (2)  
four or five (4-5)  
four or five (4-5)  
four or five (4-5)  
four or five (4-5)

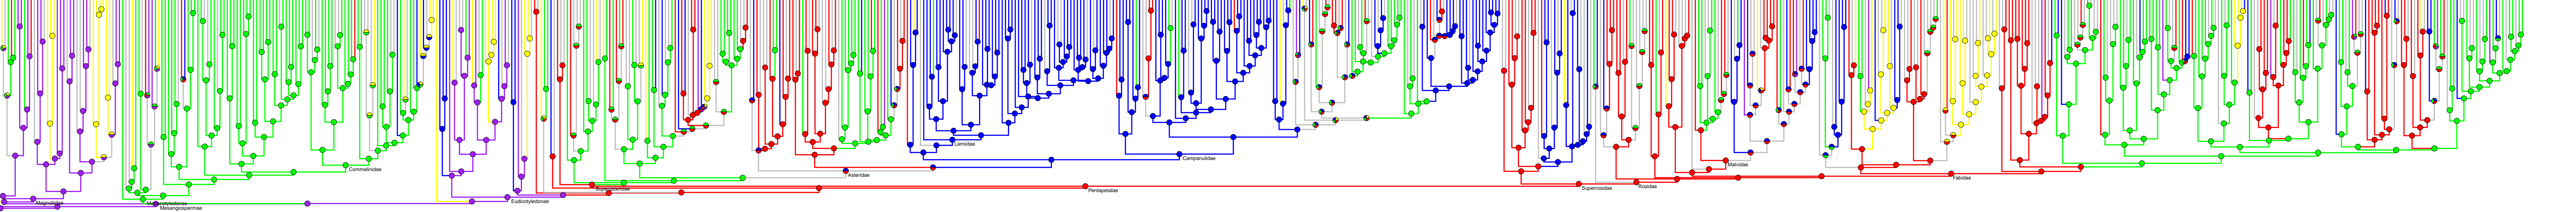

ML ancestral state reconstruction using rayDISC (R:corHMM)

401\_B. Number of structural carpels (5-state) (D2c), ARDeq model

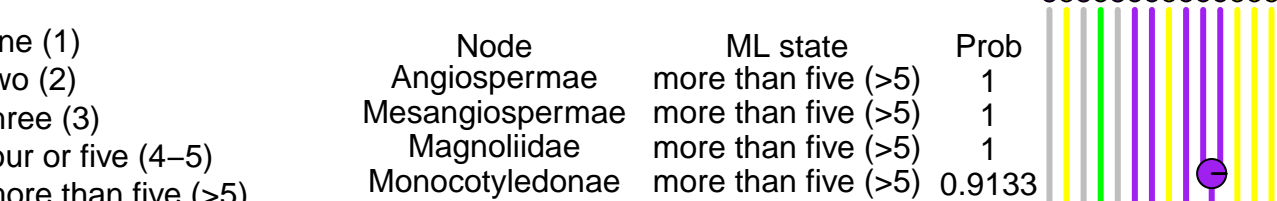

| Model   | LogL    | Npar | AIC     | AICc    | DeltaAICc | w    | q01    | ... |
|---------|---------|------|---------|---------|-----------|------|--------|-----|
| ARD     | -672.96 | 20   | 1385.91 | 1387    | 3.21      | 0.13 | 0.0018 | ... |
| ARDeq** | -671.35 | 20   | 1382.7  | 1383.79 | 0         | 0.63 | 0.0018 | ... |
| ER      | -717.6  | 1    | 1437.21 | 1437.21 | 53.43     | 0    | 0.0016 | ... |
| SYM     | -684.46 | 10   | 1388.93 | 1389.21 | 5.42      | 0.2  | 9e-04  | ... |
| SYMeq   | -682.93 | 10   | 1385.86 | 1386.14 | 2.35      | 0.4  | 9e-04  | ... |
| ORD     | -754.76 | 8    | 1525.53 | 1525.71 | 141.93    | 0    | 9e-04  | ... |
| ORDeq   | -753.24 | 8    | 1522.48 | 1522.66 | 138.88    | 0    | 9e-04  | ... |
| ORDSYM  | -759.21 | 4    | 1526.42 | 1526.47 | 142.68    | 0    | 0.0042 | ... |
| ORDSYMq | -757.77 | 4    | 1523.53 | 1523.58 | 139.8     | 0    | 0.0042 | ... |
| ORDER   | -764.51 | 1    | 1531.03 | 1531.03 | 147.25    | 0    | 0.0058 | ... |

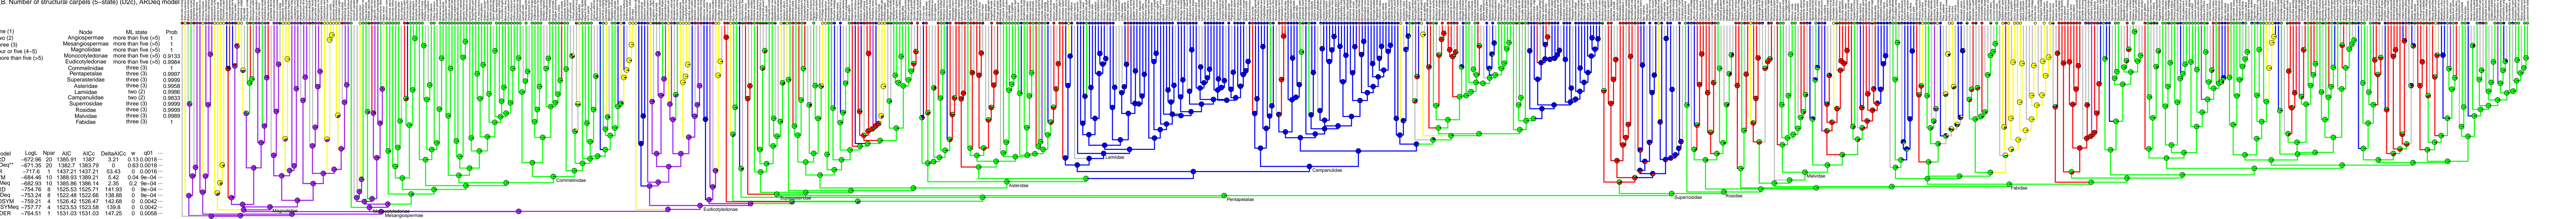

MP ancestral state reconstruction using ancestral.pars  
(R:phangorn)  
400\_A. Gynoecium phyllotaxy (D2d), 10 steps

● whorled  
● spiral

Node MP state(s)  
Angiospermae whorled / spiral  
Mesangiospermae whorled / spiral  
Magnoliidae whorled / spiral  
Monocotyledonae whorled  
Eudicotyledonae whorled  
Commelinidae whorled  
Pentapetalae whorled  
Superasteridae whorled  
Asteridae whorled  
Lamiidae whorled  
Campanulidae whorled  
Superosidae whorled  
Rosidae whorled  
Malvidae whorled  
Fabidae whorled

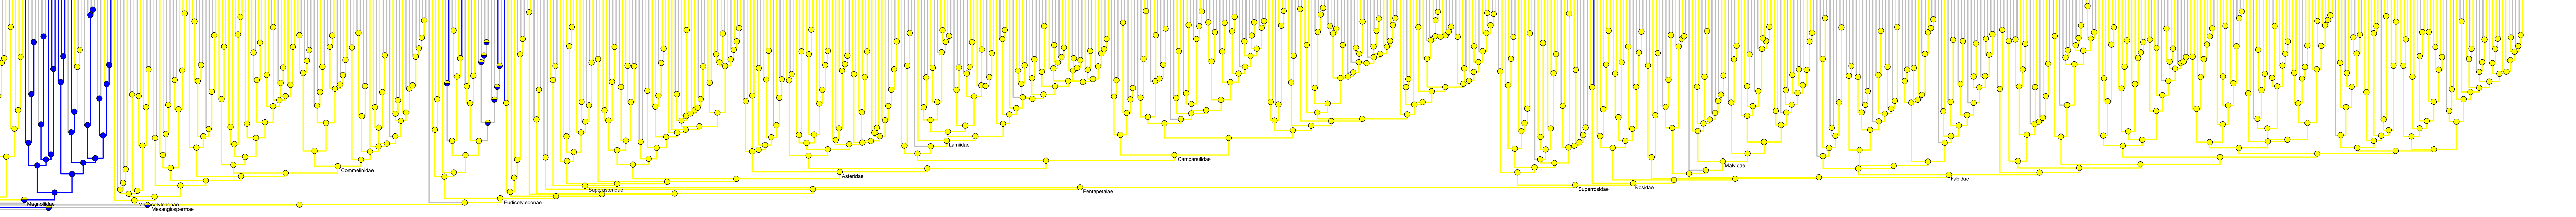

ML ancestral state reconstruction using rayDISC (R:corHMM)

400 A. Gynoeceum phyllotaxy (D2d). ARDeg model

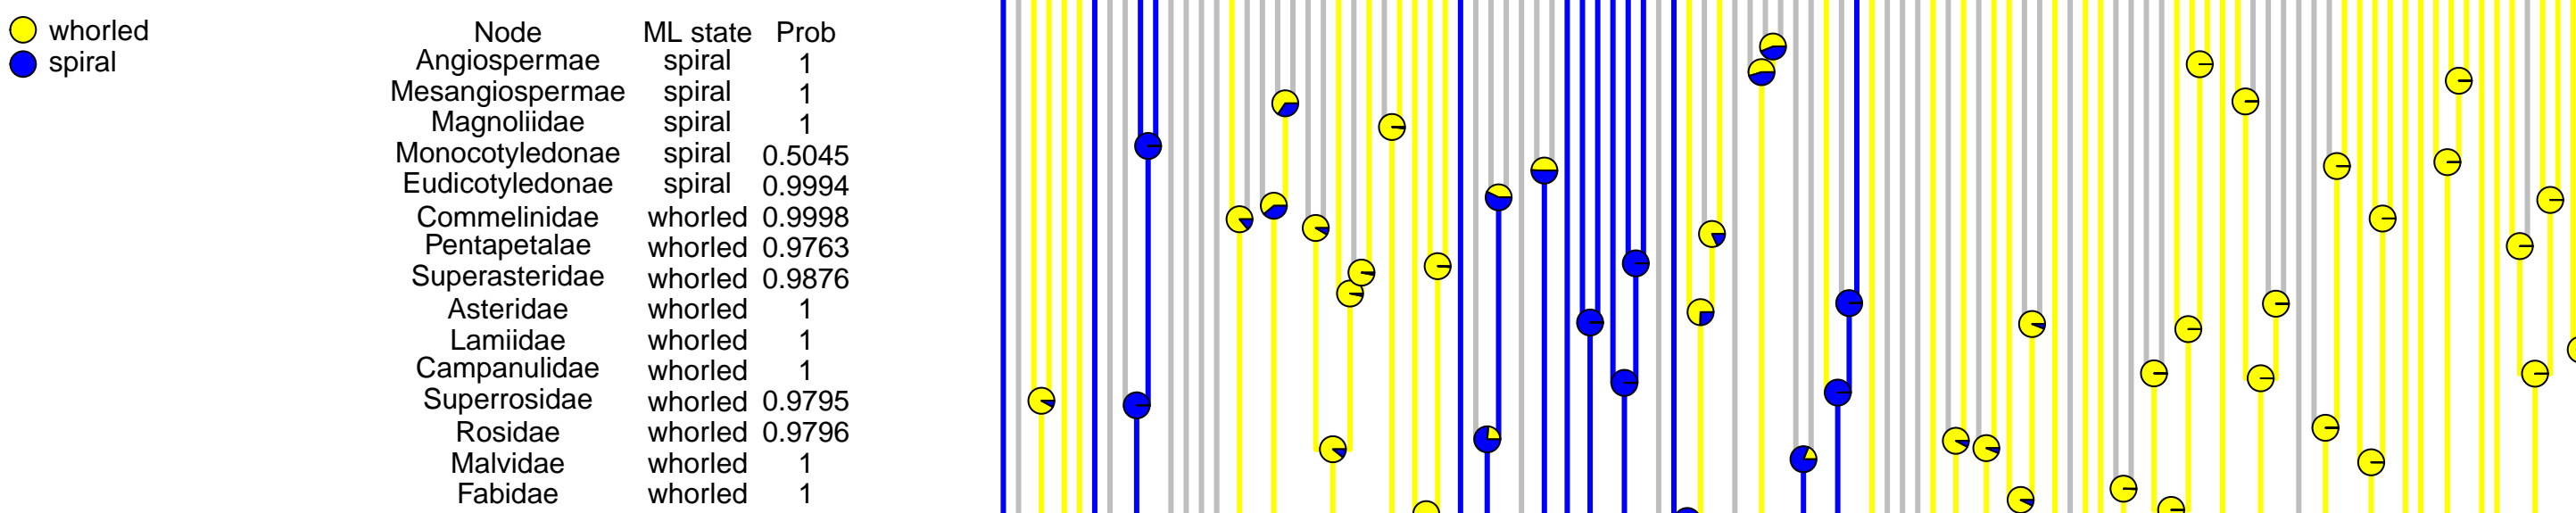

| Model   | LogL   | Npar | AIC    | AICc   | DeltaAICc | w    | q01   | q10    |
|---------|--------|------|--------|--------|-----------|------|-------|--------|
| ARD     | -39.93 | 2    | 83.86  | 83.87  | 1.39      | 0.31 | 1e-04 | 0.0084 |
| ARDeq** | -39.24 | 2    | 82.47  | 82.49  | 0         | 0.63 | 1e-04 | 0.0084 |
| ER      | -51.55 | 1    | 105.1  | 105.1  | 22.61     | 0    | 4e-04 | 4e-04  |
| UNI01   | -53.06 | 1    | 108.13 | 108.13 | 25.64     | 0    | 4e-04 |        |
| UNI10   | -42.6  | 1    | 87.21  | 87.21  | 4.73      | 0.06 |       | 0.0098 |

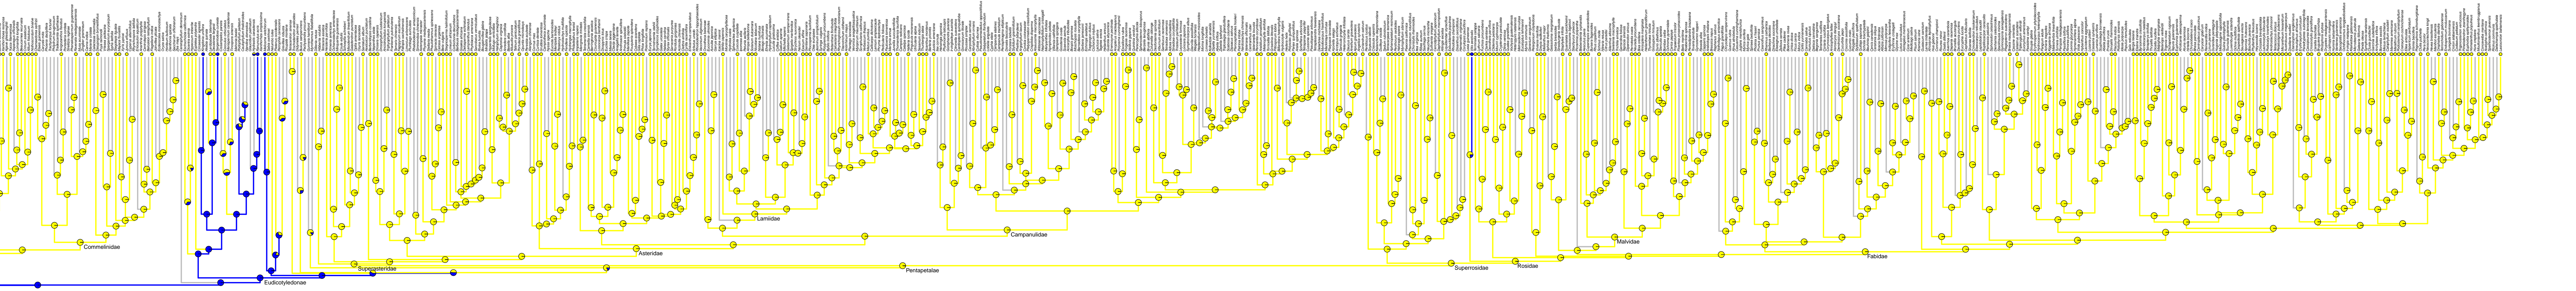

ancestral state reconstruction using ancestral.pars (phangorn)

1. A. Fusion of ovaries (binary) (D2c), 23 steps

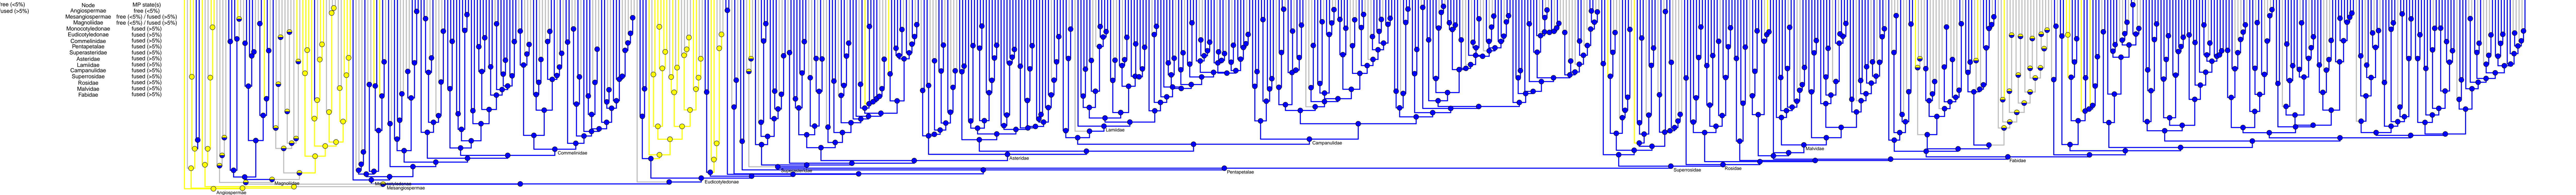

ML ancestral state reconstruction using rayDISC (R:corHMM)  
403\_A. Fusion of ovaries (binary) (D2c), ARD model

● free (<5%)  
● fused (>5%)

| Node            | ML state    | Prob   |
|-----------------|-------------|--------|
| Angiospermae    | free (<5%)  | 1      |
| Mesangiospermae | free (<5%)  | 1      |
| Magnoliidae     | free (<5%)  | 0.9999 |
| Monocotyledonae | free (<5%)  | 0.9461 |
| Eudicotyledonae | free (<5%)  | 0.9989 |
| Commelinidae    | fused (>5%) | 1      |
| Pentapetalae    | fused (>5%) | 0.9951 |
| Superasteridae  | fused (>5%) | 0.9953 |
| Asteridae       | fused (>5%) | 1      |
| Lamiidae        | fused (>5%) | 1      |
| Campanulidae    | fused (>5%) | 1      |
| Superrosidae    | fused (>5%) | 0.9995 |
| Rosidae         | fused (>5%) | 0.9998 |
| Malvidae        | fused (>5%) | 1      |
| Fabidae         | fused (>5%) | 0.9998 |

| Model | LogL    | Npar | AIC    | AICc   | DeltaAICc | w    | q01    | q10   |
|-------|---------|------|--------|--------|-----------|------|--------|-------|
| ARD** | -94.69  | 2    | 193.37 | 193.39 | 0         | 0.95 | 0.0053 | 5e-04 |
| ARDeq | -102.29 | 2    | 208.58 | 208.6  | 15.21     | 0    | 6e-04  | 8e-04 |
| ER    | -102.68 | 1    | 207.36 | 207.36 | 13.97     | 0    | 8e-04  | 8e-04 |
| UNI01 | -98.68  | 1    | 199.36 | 199.37 | 5.98      | 0.05 | 0.013  |       |
| UNI10 | -106.84 | 1    | 215.69 | 215.69 | 22.31     | 0    |        | 9e-04 |

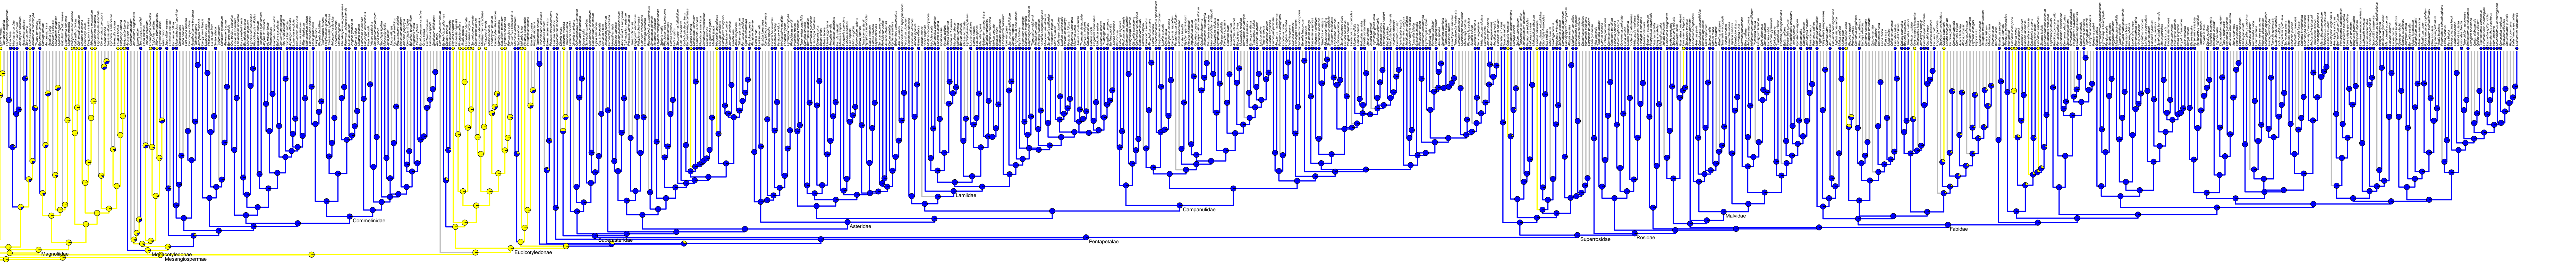



ML ancestral state reconstruction using rayDISC (R:corHMM)

411\_A. Number of ovules per functional carpel (3-state) (D2c), ARDeq model

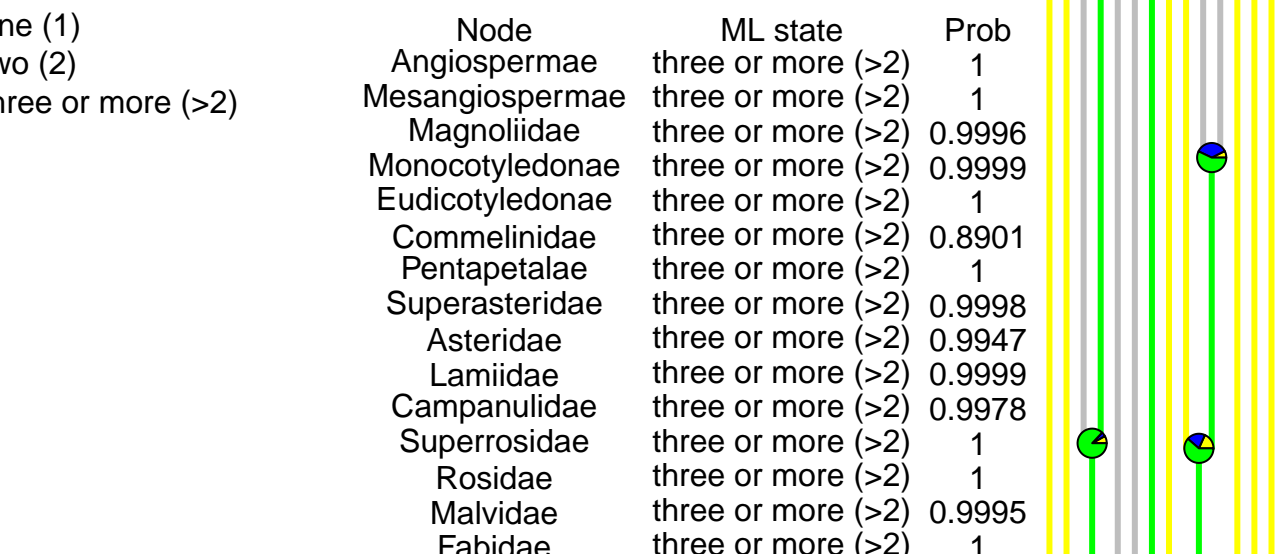

| Model    | LogL    | Npar | AIC    | AICc   | DeltaAICc | w    | q01    | ... |
|----------|---------|------|--------|--------|-----------|------|--------|-----|
| ARD      | -388.52 | 6    | 789.04 | 789.15 | 2.18      | 0.25 | 0.0013 | ... |
| ARDeq**  | -387.43 | 6    | 786.86 | 786.97 | 0         | 0.75 | 0.0013 | ... |
| ER       | -402.57 | 1    | 807.14 | 807.15 | 20.18     | 0    | 0.0029 | ... |
| SYM      | -402.09 | 3    | 810.19 | 810.22 | 23.25     | 0    | 0.0026 | ... |
| SYMeq    | -401.15 | 3    | 808.3  | 808.23 | 21.36     | 0    | 0.0026 | ... |
| ORD      | -399.49 | 4    | 806.99 | 807.04 | 20.07     | 0    | 0.0019 | ... |
| ORDeq    | -398.41 | 4    | 804.82 | 804.87 | 17.9      | 0    | 0.0019 | ... |
| ORDSYM   | -412.7  | 2    | 829.4  | 829.42 | 42.45     | 0    | 0.0055 | ... |
| ORDSYMeq | -411.82 | 2    | 827.63 | 827.65 | 40.68     | 0    | 0.0055 | ... |
| ORDER    | -413.67 | 1    | 829.34 | 829.34 | 42.38     | 0    | 0.0063 | ... |

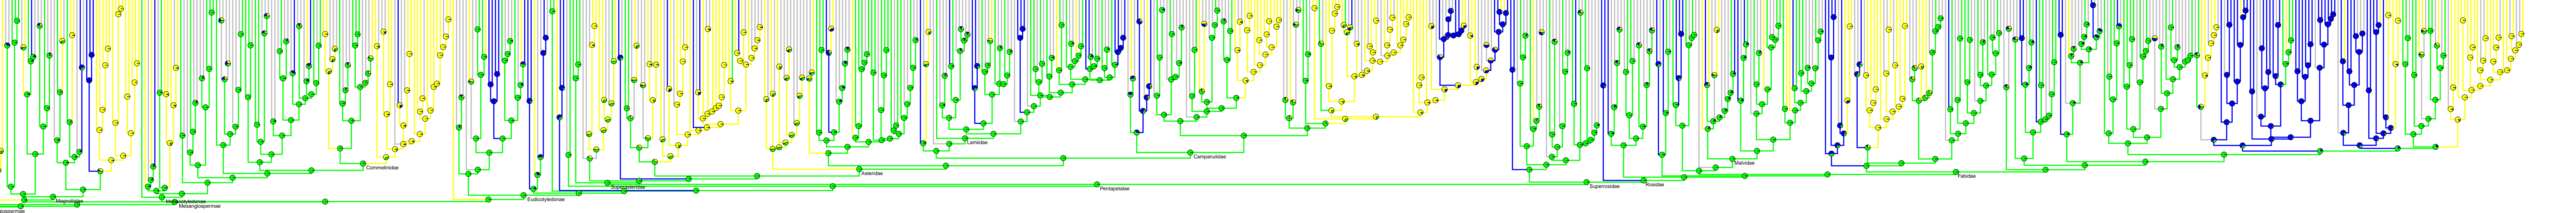

Supplement: Supplementary Data 16 [file ncomms16047-s17.pdf]
