# Supplementary material for: The ancestral flower of angiosperms and its early diversification
Source: Nat Commun. 2017 Aug 1;8:16047. doi: 10.1038/ncomms16047 (PMC5543309; doi:10.1038/ncomms16047)

MP ancestral state reconstruction using *ancestral.pars*  
(R:phangorn)  
100\_A. Functional sex of flowers (D2d), 98 steps

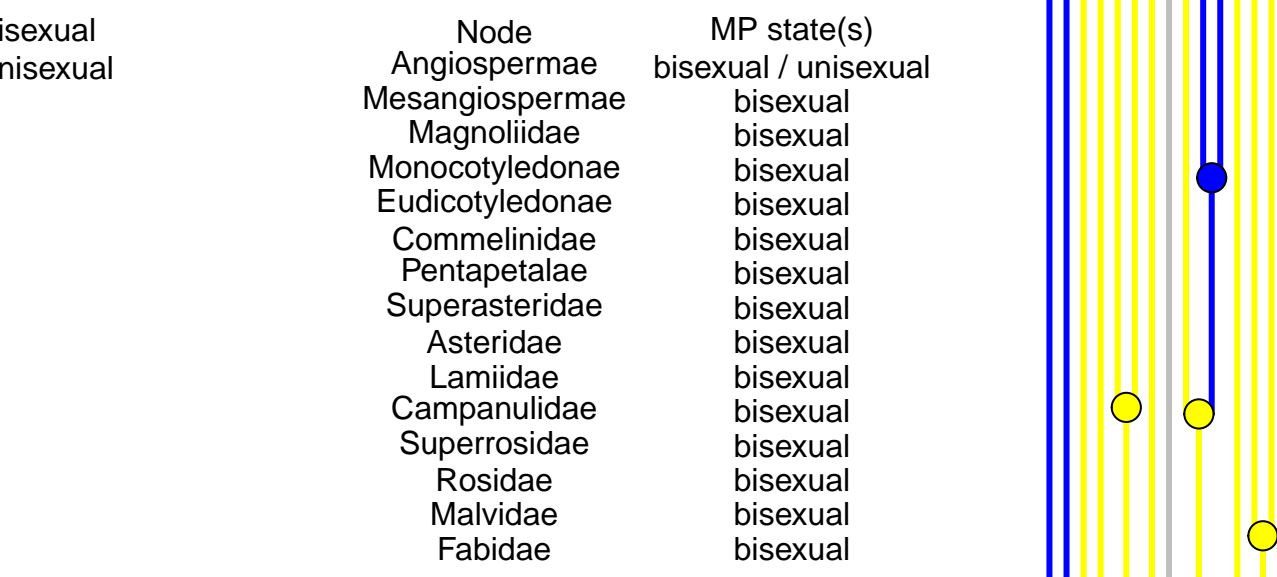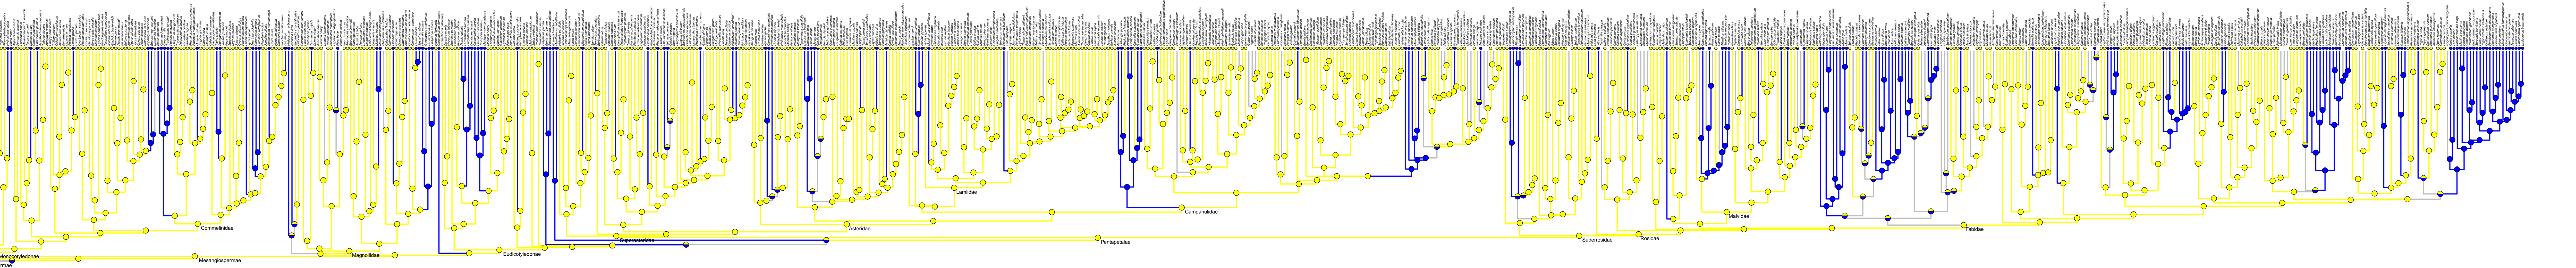







MP ancestral state reconstruction using ancestral.pars  
(R:phangorn)  
102\_B. Ovary position (binary) (D2d), 79 steps

● superior  
● inferior

Node  
Angiospermae  
Mesangiospermae  
Magnoliidae  
Monocotyledonae  
Eudicotyledonae  
Commelinidae  
Pentapetalae  
Superasteridae  
Asteridae  
Lamiidae  
Campanulidae  
Superrosidae  
Rosidae  
Malvidae  
Fabidae

MP state(s)  
superior  
superior / inferior  
superior  
superior  
superior

Angiospermae

Monocotyledonae

Mesangiospermae

Magnoliidae

Eudicotyledonae

Superasteridae

Asteridae

Campanulidae

Lamiidae

Superrosidae

Rosidae

Malvidae

Fabidae

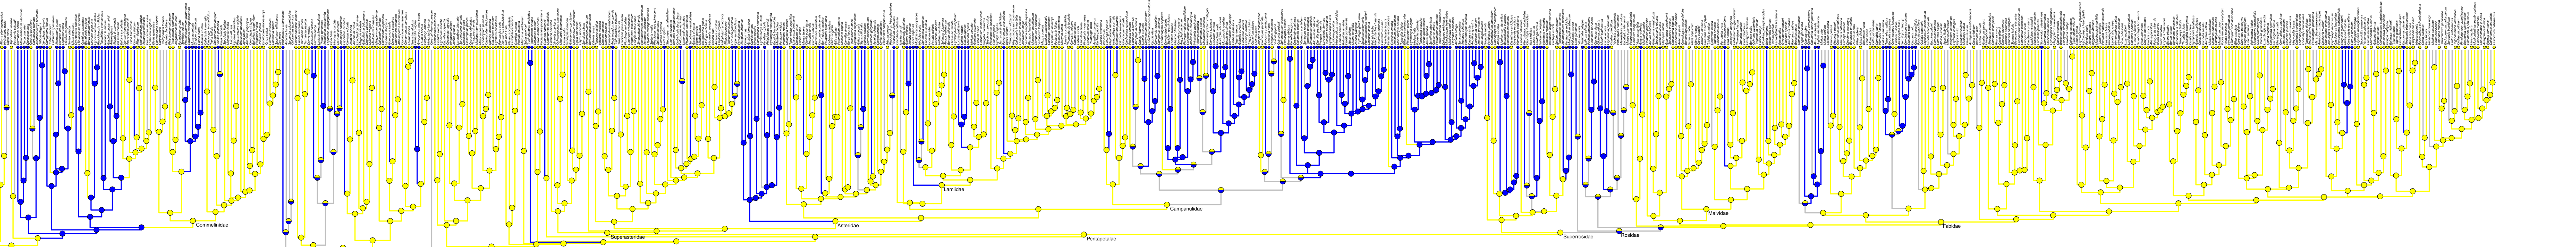

ML ancestral state reconstruction using rayDISC (R:corHMM)  
102\_B. Ovary position (binary) (D2d), ARDeq model

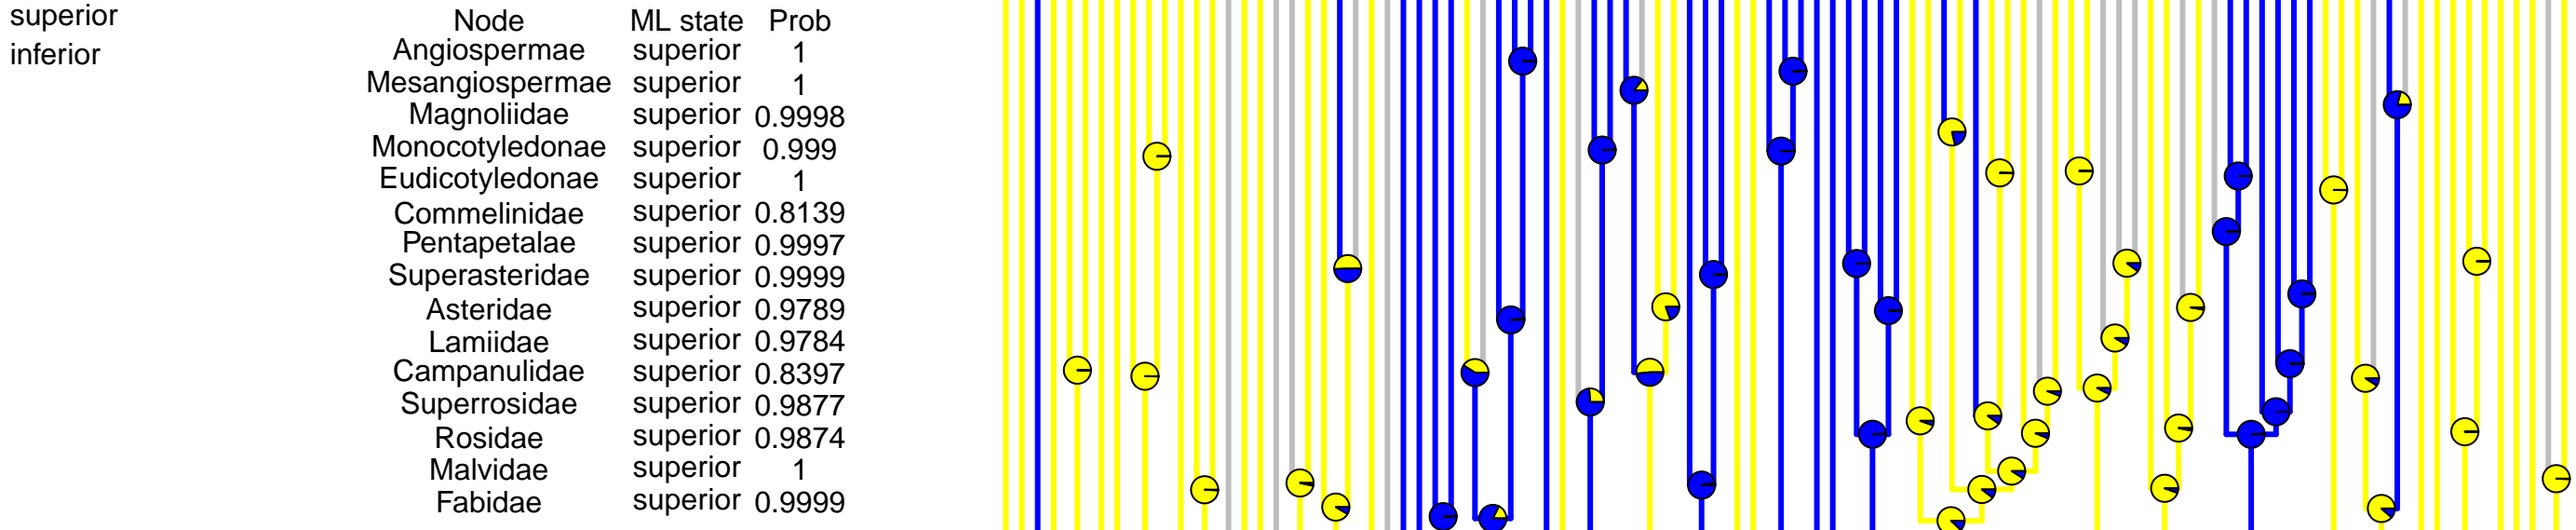

| Model  | LogL    | Npar | AIC    | AICc   | DeltaAICc | w    | q01    | q10    |
|--------|---------|------|--------|--------|-----------|------|--------|--------|
| ARD    | -270.92 | 2    | 545.84 | 545.85 | 1.38      | 0.22 | 0.0022 | 0.0034 |
| ARDeq* | -270.23 | 2    | 544.45 | 544.47 | 0         | 0.45 | 0.0022 | 0.0034 |
| ER     | -281.53 | 1    | 545.06 | 545.07 | 0.6       | 0.33 | 0.0024 | 0.0024 |
| UNI01  | -280.08 | 1    | 562.17 | 562.17 | 17.7      | 0    | 0      | 0.0027 |
| UNI10  | -294.52 | 1    | 591.04 | 591.05 | 46.58     | 0    | 0      | 0.0099 |

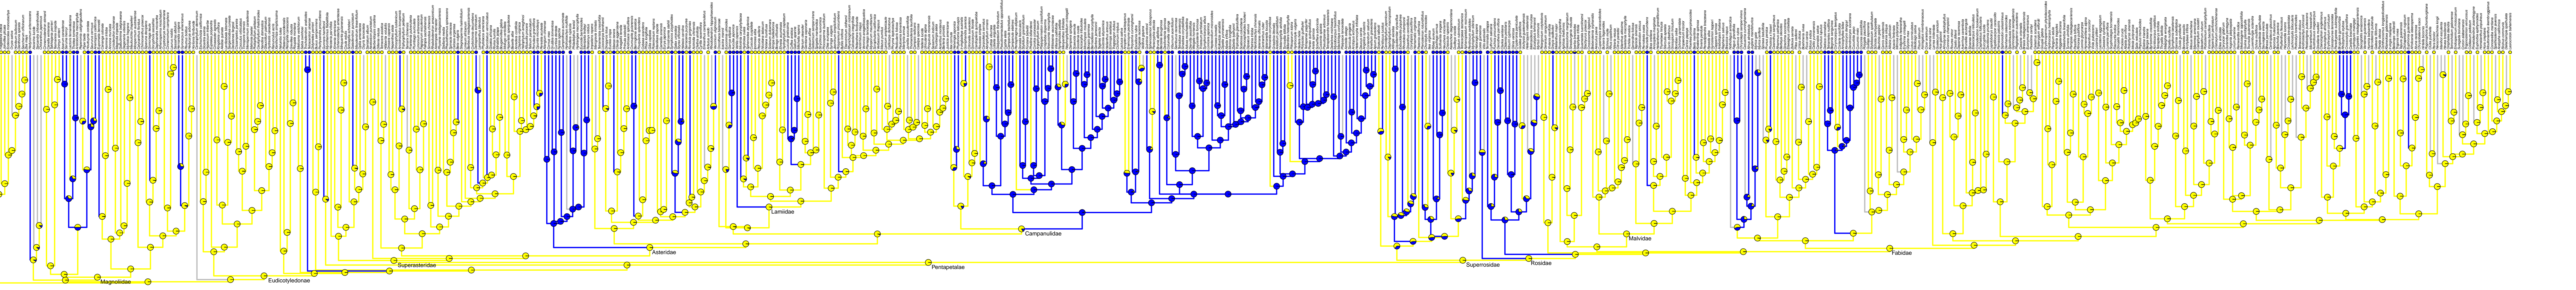







ML ancestral state reconstruction using rayDISC (R:corHMM)

201\_B. Number of perianth parts (3-state) (D2c), ARDeq model

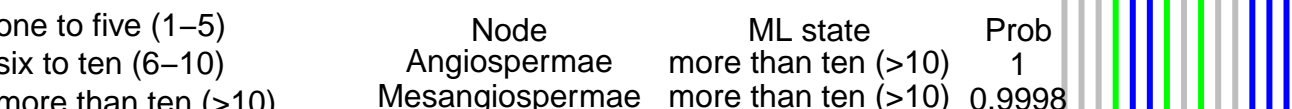

| Node            | ML state            | Prob   |
|-----------------|---------------------|--------|
| Angiospermae    | more than ten (>10) | 1      |
| Mesangiospermae | more than ten (>10) | 0.9998 |
| Magnoliidae     | more than ten (>10) | 0.9999 |
| Monocotyledonae | six to ten (6-10)   | 0.5866 |
| Eudicotyledonae | more than ten (>10) | 0.998  |
| Commelinidae    | six to ten (6-10)   | 0.9999 |
| Pentapetalae    | six to ten (6-10)   | 0.9963 |
| Superasteridae  | six to ten (6-10)   | 0.9982 |
| Asteridae       | six to ten (6-10)   | 1      |
| Lamiidae        | six to ten (6-10)   | 0.9998 |
| Campanulidae    | six to ten (6-10)   | 1      |
| Superrosidae    | six to ten (6-10)   | 0.9992 |
| Rosidae         | six to ten (6-10)   | 0.9994 |
| Malvidae        | six to ten (6-10)   | 0.9998 |
| Fabidae         | six to ten (6-10)   | 0.9993 |

| Model   | LogL    | Npar | AIC    | AICc   | DeltaAICc | w    | q01    | ... |
|---------|---------|------|--------|--------|-----------|------|--------|-----|
| ARD     | -324.73 | 6    | 661.47 | 661.57 | 2.2       | 0.25 | 0.004  | ... |
| ARDeq** | -323.64 | 6    | 659.27 | 659.38 | 0         | 0.74 | 0.004  | ... |
| ER      | -349.9  | 1    | 701.8  | 701.81 | 42.43     | 0    | 0.0013 | ... |
| SYM     | -339.09 | 3    | 684.18 | 684.21 | 24.83     | 0    | 0.002  | ... |
| SYMeq   | -338.02 | 3    | 682.03 | 682.06 | 22.68     | 0    | 0.002  | ... |
| ORD     | -331.17 | 4    | 670.33 | 670.39 | 11.01     | 0    | 0.0042 | ... |
| ORDeq   | -330.07 | 4    | 668.14 | 668.19 | 8.81      | 0.01 | 0.0042 | ... |
| ORDSYM  | -342.19 | 2    | 688.38 | 688.39 | 29.02     | 0    | 0.0021 | ... |
| ORDSYMq | -341.13 | 2    | 686.25 | 686.27 | 26.89     | 0    | 0.0021 | ... |
| ORDER   | -351.52 | 1    | 705.03 | 705.04 | 45.66     | 0    | 0.0014 | ... |

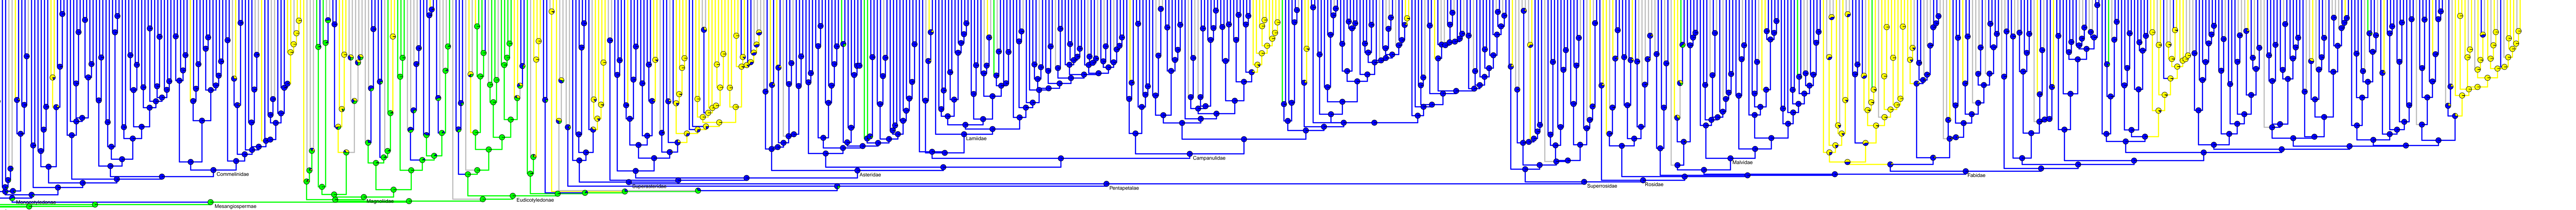



ML ancestral state reconstruction using rayDISC (R:corHMM)  
201\_C. Number of perianth parts (binary) (D2c), ARDeq model

● one to six (1–6)  
● more than six (>6)

| Node            | ML state           | Prob   |
|-----------------|--------------------|--------|
| Angiospermae    | more than six (>6) | 1      |
| Mesangiospermae | more than six (>6) | 0.9998 |
| Magnoliidae     | more than six (>6) | 1      |
| Monocotyledonae | one to six (1–6)   | 0.8013 |
| Eudicotyledonae | more than six (>6) | 1      |
| Commelinidae    | one to six (1–6)   | 1      |
| Pentapetalae    | more than six (>6) | 1      |
| Superasteridae  | more than six (>6) | 1      |
| Asteridae       | more than six (>6) | 1      |
| Lamiidae        | more than six (>6) | 1      |
| Campanulidae    | more than six (>6) | 1      |
| Superrosidae    | more than six (>6) | 1      |
| Rosidae         | more than six (>6) | 1      |
| Malvidae        | more than six (>6) | 1      |
| Fabidae         | more than six (>6) | 1      |

| Model   | LogL    | Npar | AIC    | AICc   | DeltaAICc | w    | q01    | q10    |
|---------|---------|------|--------|--------|-----------|------|--------|--------|
| ARD     | -247.89 | 2    | 499.77 | 499.79 | 1.39      | 0.32 | 6e-04  | 0.0026 |
| ARDeq** | -247.19 | 2    | 498.39 | 498.4  | 0         | 0.65 | 6e-04  | 0.0026 |
| ER      | -254.48 | 1    | 510.95 | 510.96 | 12.56     | 0    | 0.0022 | 0.0022 |
| UNI01   | -323.21 | 1    | 648.42 | 648.43 | 150.03    | 0    | 0.0081 |        |
| UNI10   | -251.44 | 1    | 504.87 | 504.88 | 6.48      | 0.03 |        | 0.0029 |

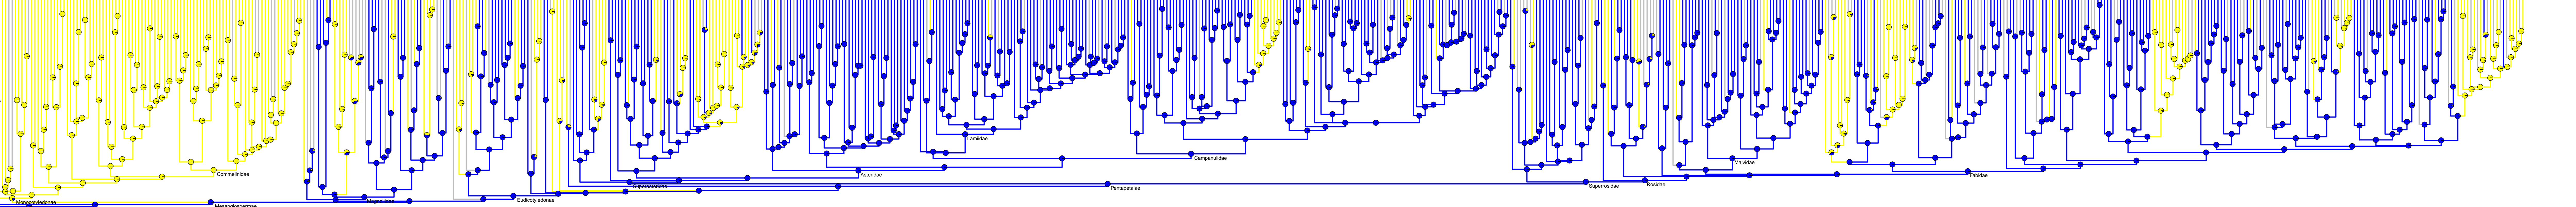



| Model | LogL   | Npar | AIC    | AICc   | DeltaAICc | w    | q01   | q10    |
|-------|--------|------|--------|--------|-----------|------|-------|--------|
| ARD** | -70.65 | 2    | 145.29 | 145.31 | 0         | 0.99 | 2e-04 | 0.0113 |
| ARDeq | -77.56 | 2    | 159.12 | 159.14 | 13.83     | 0    | 4e-04 | 8e-04  |
| ER    | -78.28 | 1    | 158.56 | 158.57 | 13.26     | 0    | 4e-04 | 4e-04  |
| UNI01 | -78.7  | 1    | 159.39 | 159.4  | 14.09     | 0    | 4e-04 |        |
| UNI10 | -76.92 | 1    | 155.84 | 155.84 | 10.53     | 0.01 |       | 0.0185 |

ML ancestral state reconstruction using rayDISC (R:corHMM)  
 230\_A. Perianth phyllotaxy (binary) (D2d), ARD model

● whorled

● spiral

| Node            | ML state | Prob   |
|-----------------|----------|--------|
| Angiospermae    | spiral   | 1      |
| Mesangiospermae | spiral   | 0.9999 |
| Magnoliidae     | spiral   | 0.9998 |
| Monocotyledonae | spiral   | 0.5013 |
| Eudicotyledonae | spiral   | 0.9997 |
| Commelinidae    | whorled  | 0.9996 |
| Pentapetalae    | whorled  | 0.9769 |
| Superasteridae  | whorled  | 0.9806 |
| Asteridae       | whorled  | 0.9995 |
| Lamiidae        | whorled  | 0.9999 |
| Campanulidae    | whorled  | 1      |
| Superrosidae    | whorled  | 0.9887 |
| Rosidae         | whorled  | 0.9926 |
| Malvidae        | whorled  | 1      |
| Fabidae         | whorled  | 1      |

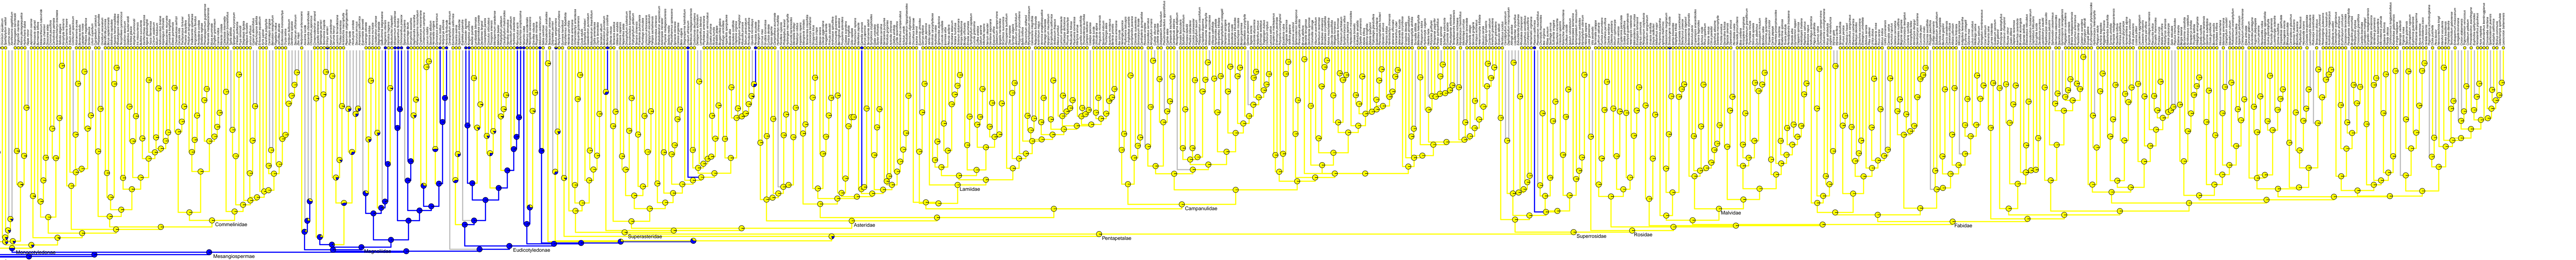

MP ancestral state reconstruction using ancestral.pars

(R:phangorn)  
231\_A. Number of perianth whorls (D2c), 73 steps

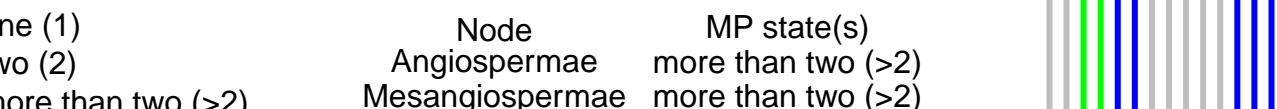

| Node            | MP state(s)        |
|-----------------|--------------------|
| Angiospermae    | more than two (>2) |
| Mesangiospermae | more than two (>2) |
| Magnoliidae     | more than two (>2) |
| Monocotyledonae | two (2)            |
| Eudicotyledonae | more than two (>2) |
| Commelinidae    | two (2)            |
| Pentapetalae    | two (2)            |
| Superasteridae  | two (2)            |
| Asteridae       | two (2)            |
| Lamiidae        | two (2)            |
| Campanulidae    | two (2)            |
| Superrosidae    | two (2)            |
| Rosidae         | two (2)            |
| Malvidae        | two (2)            |
| Fabidae         | two (2)            |

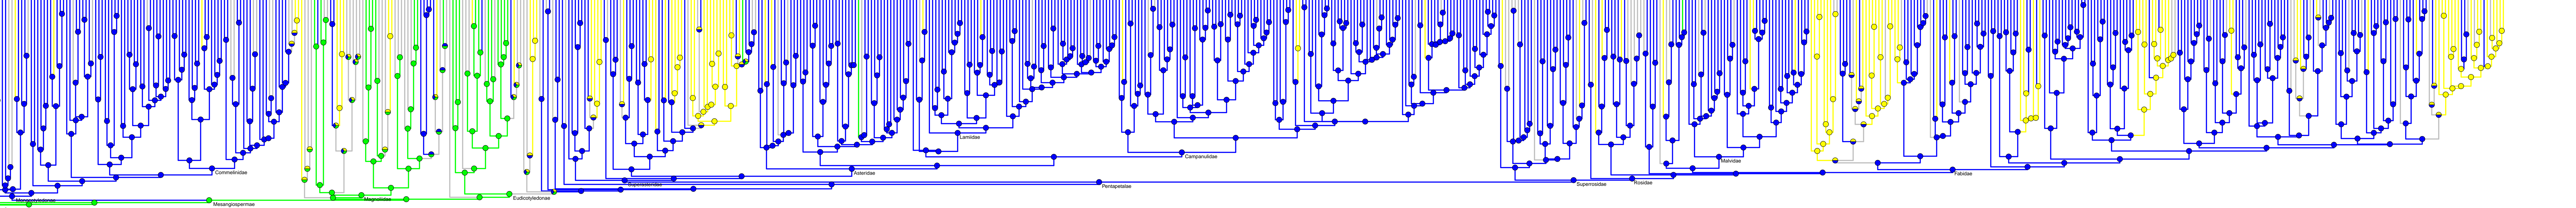

ML ancestral state reconstruction using rayDISC (R:corHMM)

231\_A. Number of perianth whorls (D2c), ARDeq model

- one (1)
- two (2)
- more than two (>2)

| Model   | LogL    | Npar | AIC    | AICc   | DeltaAICc | w    | q01    | ... |
|---------|---------|------|--------|--------|-----------|------|--------|-----|
| ARD     | -269.2  | 6    | 550.41 | 550.51 | 2.2       | 0.25 | 0.0048 | ... |
| ARDeq** | -268.1  | 6    | 548.21 | 548.32 | 0         | 0.75 | 0.0048 | ... |
| ER      | -311.61 | 1    | 625.22 | 625.23 | 76.91     | 0    | 0.001  | ... |
| SYM     | -293.84 | 3    | 593.67 | 593.7  | 45.39     | 0    | 0.0019 | ... |
| SYMeq   | -292.85 | 3    | 591.69 | 591.72 | 43.4      | 0    | 0.0019 | ... |
| ORD     | -277.03 | 4    | 562.06 | 562.11 | 13.79     | 0    | 0.0047 | ... |
| ORDeq   | -275.93 | 4    | 559.86 | 559.91 | 11.59     | 0    | 0.0047 | ... |
| ORDSYM  | -299.35 | 2    | 602.7  | 602.71 | 54.4      | 0    | 0.0019 | ... |
| ORDSYMq | -298.28 | 2    | 600.56 | 600.58 | 52.26     | 0    | 0.0019 | ... |
| ORDER   | -314.24 | 1    | 630.48 | 630.49 | 82.17     | 0    | 0.0012 | ... |

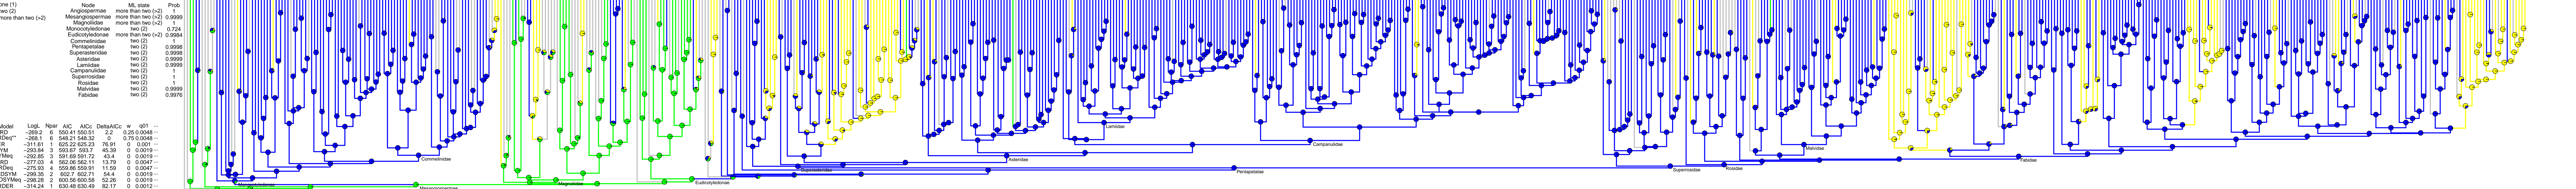



ML ancestral state reconstruction using rayDISC (R:corHMM)  
232\_A. Perianth merism (4-state) (D2c), SYMeq model

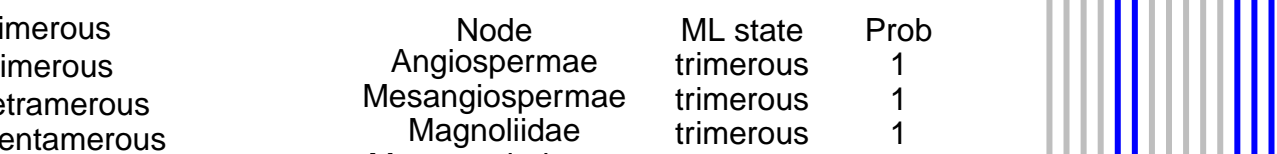

| Node            | ML state    | Prob   |
|-----------------|-------------|--------|
| Angiospermae    | trimerous   | 1      |
| Mesangiospermae | trimerous   | 1      |
| Magnoliidae     | trimerous   | 1      |
| Monocotyledonae | trimerous   | 1      |
| Eudicotyledonae | trimerous   | 0.9775 |
| Commelinidae    | trimerous   | 1      |
| Pentapetalae    | pentamerous | 0.9997 |
| Superasteridae  | pentamerous | 0.9999 |
| Asteridae       | pentamerous | 1      |
| Lamiidae        | pentamerous | 0.9999 |
| Campanulidae    | pentamerous | 1      |
| Superrosidae    | pentamerous | 1      |
| Rosidae         | pentamerous | 1      |
| Malvidae        | pentamerous | 1      |
| Fabidae         | pentamerous | 1      |

| Model    | LogL    | Npar | AIC    | AICc   | DeltaAICc | w    | q01    | ... |
|----------|---------|------|--------|--------|-----------|------|--------|-----|
| ARD      | -324.05 | 12   | 672.09 | 672.49 | 10.26     | 0    | 0      | ... |
| ARDeq    | -322.68 | 12   | 669.36 | 669.76 | 7.53      | 0.02 | 0      | ... |
| ER       | -360.93 | 1    | 723.86 | 723.87 | 61.64     | 0    | 8e-04  | ... |
| SYM      | -326.44 | 6    | 664.89 | 664.99 | 2.76      | 0.2  | 0.0013 | ... |
| SYMeq**  | -325.06 | 6    | 662.12 | 662.23 | 0         | 0.72 | 0.0013 | ... |
| ORD      | -337.09 | 6    | 686.19 | 686.29 | 24.06     | 0    | 0      | ... |
| ORDeq    | -335.78 | 6    | 683.56 | 683.66 | 21.43     | 0    | 0      | ... |
| ORDSYM   | -345.25 | 3    | 696.5  | 696.53 | 34.3      | 0    | 0.002  | ... |
| ORDSYMeq | -343.88 | 3    | 693.75 | 693.78 | 31.55     | 0    | 0.002  | ... |
| ORDER    | -346.93 | 1    | 695.87 | 695.87 | 33.64     | 0    | 0.0025 | ... |

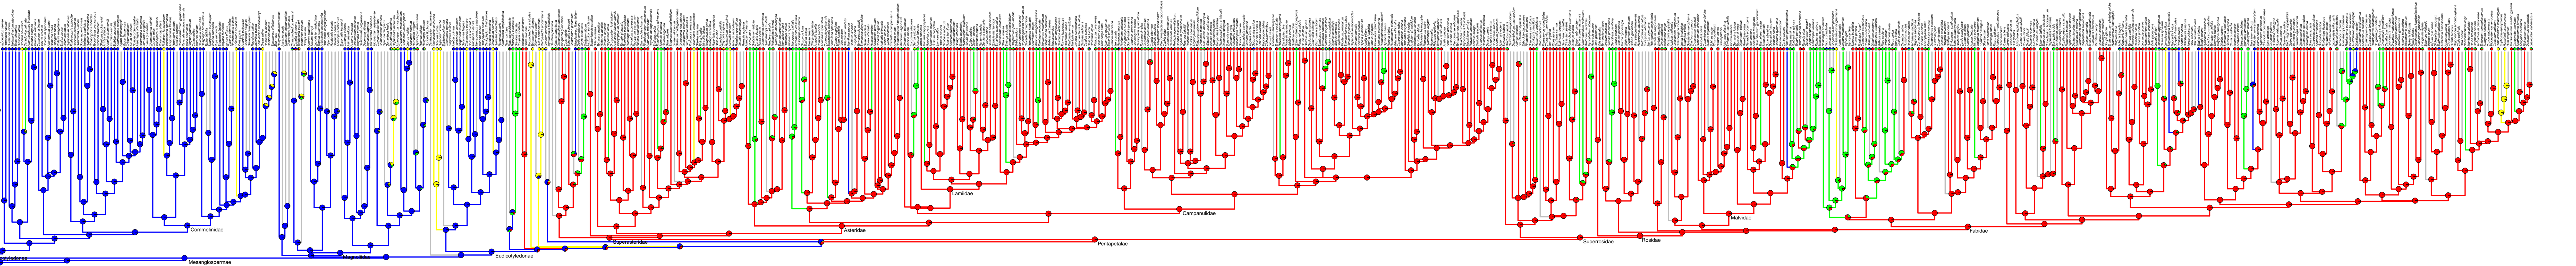

MP ancestral state reconstruction using ancestral.pars  
(R:phangorn)  
232\_B. Perianth merism (3-state) (D2c), 70 steps

● trimerous  
● tetramerous  
● pentamerous

Node  
Angiospermae  
Mesangiospermae  
Magnoliidae  
Monocotyledonae  
Eudicotyledonae  
Commelinidae  
Pentapetalae  
Superasteridae  
Asteridae  
Lamiidae  
Campanulidae  
Superrosidae  
Rosidae  
Malvidae  
Fabidae

MP state(s)  
trimerous  
trimerous  
trimerous  
trimerous  
trimerous  
trimerous  
pentamerous  
pentamerous  
pentamerous  
pentamerous  
pentamerous  
pentamerous  
pentamerous  
pentamerous  
pentamerous

Angiospermae

Monocotyledonae

Mesangiospermae

Magnoliidae

Eudicotyledonae

Superasteridae

Asteridae

Lamiidae

Campanulidae

Superrosidae

Rosidae

Malvidae

Commelinidae

Pentapetalae

Magnoliidae

Eudicotyledonae

Superasteridae

Asteridae

Lamiidae

Campanulidae

Superrosidae

Rosidae

Malvidae

Fabidae

Commelinidae

Pentapetalae

Magnoliidae

Eudicotyledonae

Superasteridae

Asteridae

Lamiidae

Campanulidae

Superrosidae

Rosidae

Malvidae

Fabidae

Commelinidae

Pentapetalae

Magnoliidae

Eudicotyledonae

Superasteridae

Asteridae

Lamiidae

Campanulidae

Superrosidae

Rosidae

Malvidae

Fabidae

Commelinidae

</





ML ancestral state reconstruction using rayDISC (R:corHMM)  
234\_A. Perianth differentiation (binary) (D2), ARDeq model

● undifferentiated  
● differentiated

| Node            | ML state         | Prob   |
|-----------------|------------------|--------|
| Angiospermae    | undifferentiated | 1      |
| Mesangiospermae | undifferentiated | 1      |
| Magnoliidae     | undifferentiated | 0.9999 |
| Monocotyledonae | undifferentiated | 1      |
| Eudicotyledonae | undifferentiated | 0.9914 |
| Commelinidae    | undifferentiated | 1      |
| Pentapetalae    | differentiated   | 0.9564 |
| Superasteridae  | differentiated   | 0.9576 |
| Asteridae       | differentiated   | 0.9986 |
| Lamiidae        | differentiated   | 0.9998 |
| Campanulidae    | differentiated   | 1      |
| Superrosidae    | differentiated   | 0.9917 |
| Rosidae         | differentiated   | 0.9947 |
| Malvidae        | differentiated   | 0.9989 |
| Fabidae         | differentiated   | 0.987  |

| Model   | LogL    | Npar | AIC    | AICc   | DeltaAICc | w    | q01    | q10    |
|---------|---------|------|--------|--------|-----------|------|--------|--------|
| ARD     | -199.62 | 2    | 403.23 | 403.25 | 1.38      | 0.33 | 0.0046 | 0.0015 |
| ARDeq** | -198.92 | 2    | 401.85 | 401.86 | 0         | 0.67 | 0.0046 | 0.0015 |
| ER      | -209.01 | 1    | 420.03 | 420.03 | 18.17     | 0    | 0.0025 | 0.0025 |
| UNI01   | -228.55 | 1    | 459.09 | 459.1  | 57.23     | 0    | 0.0089 |        |
| UNI10   | -237.12 | 1    | 476.25 | 476.25 | 74.39     | 0    | 0.0035 |        |

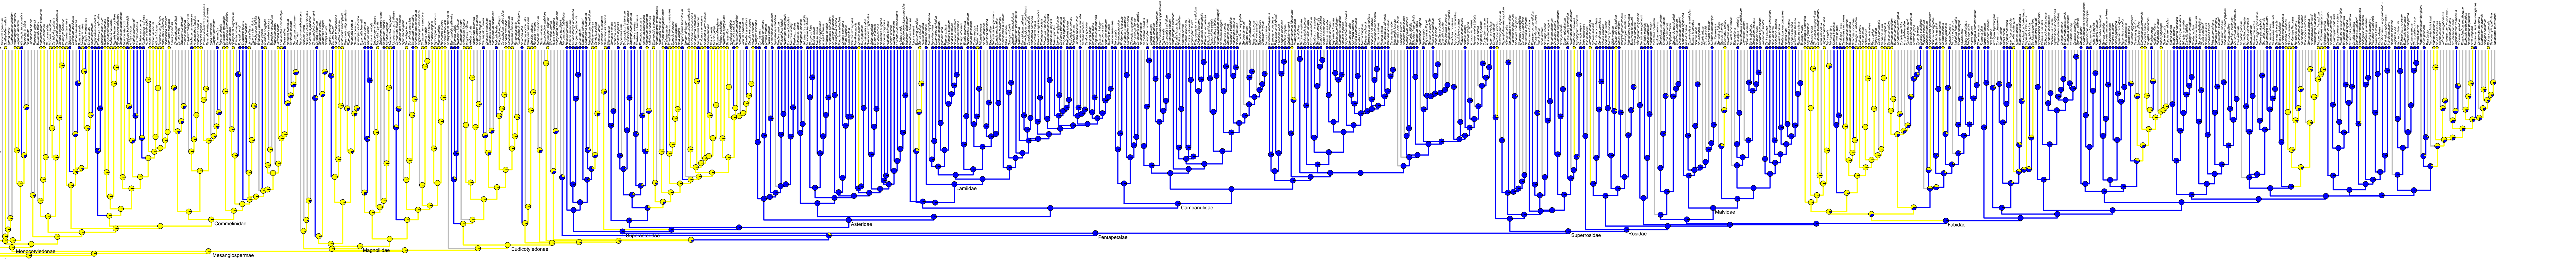

MP ancestral state reconstruction using ancestral.pars  
(R:phangorn)

204\_A. Fusion of perianth (D2c). 77 steps

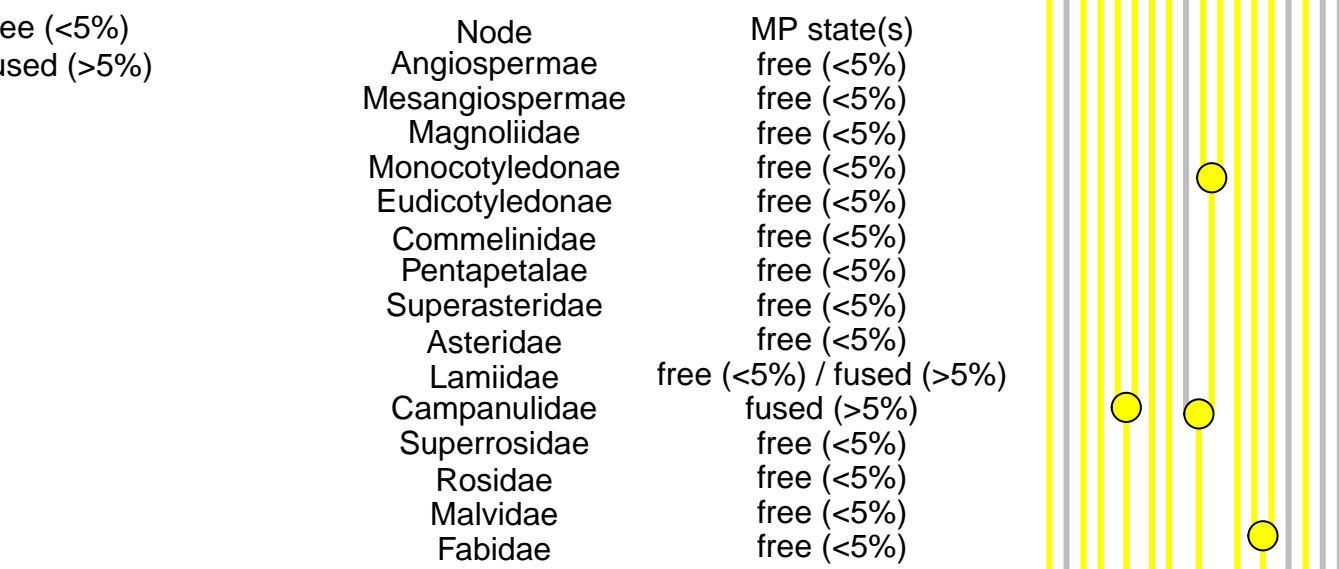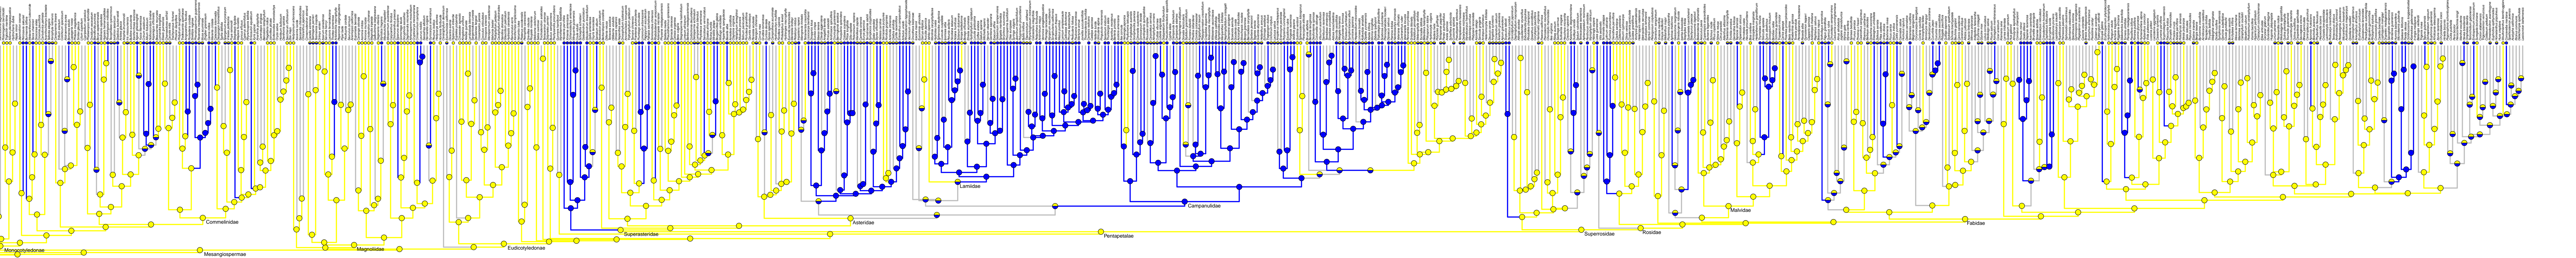

ML ancestral state reconstruction using rayDISC (R:corHMM)  
 204\_A. Fusion of perianth (D2c), ARDeq model

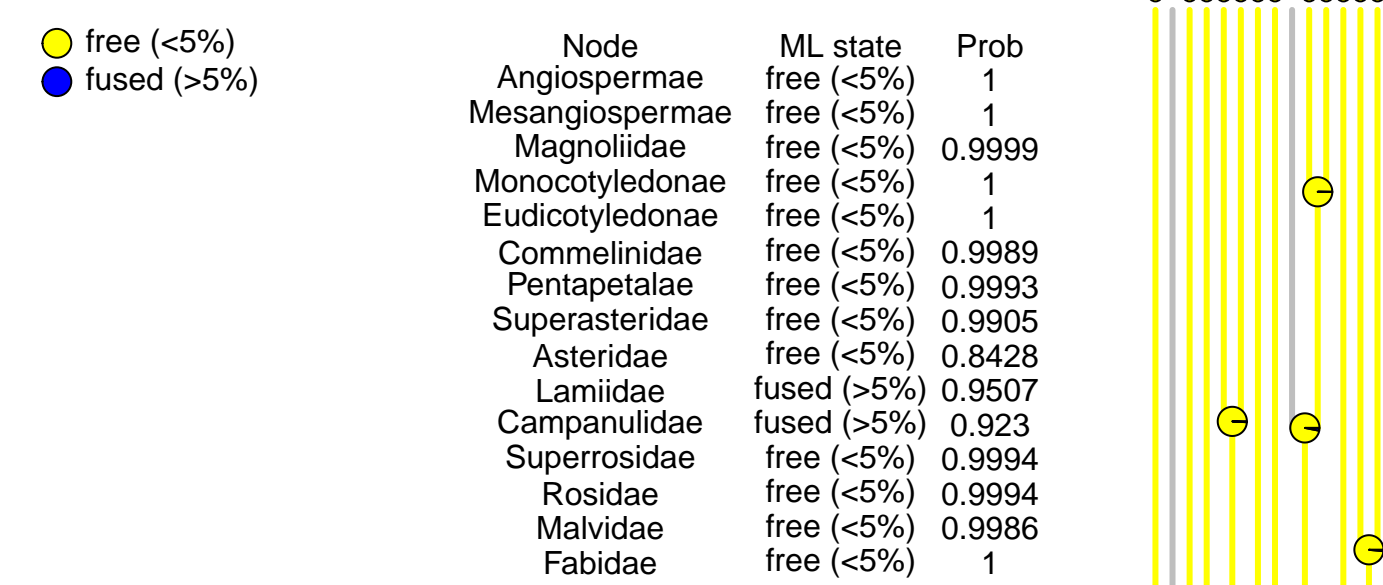

| Model  | LogL    | Npar | AIC    | AICc   | DeltaAICc | w    | q01    | q10    |
|--------|---------|------|--------|--------|-----------|------|--------|--------|
| ARD    | -225.31 | 2    | 454.62 | 454.63 | 1.38      | 0.21 | 0.0044 | 0.0035 |
| ARDeq* | -224.62 | 2    | 453.24 | 453.25 | 0         | 0.41 | 0.0044 | 0.0035 |
| ER     | -225.7  | 1    | 453.41 | 453.41 | 0.16      | 0.38 | 0.0042 | 0.0042 |
| UNI01  | -238.34 | 1    | 478.68 | 478.69 | 25.44     | 0    | 0.005  |        |
| UNI10  | -236.27 | 1    | 474.53 | 474.54 | 21.29     | 0    |        | 0.0081 |

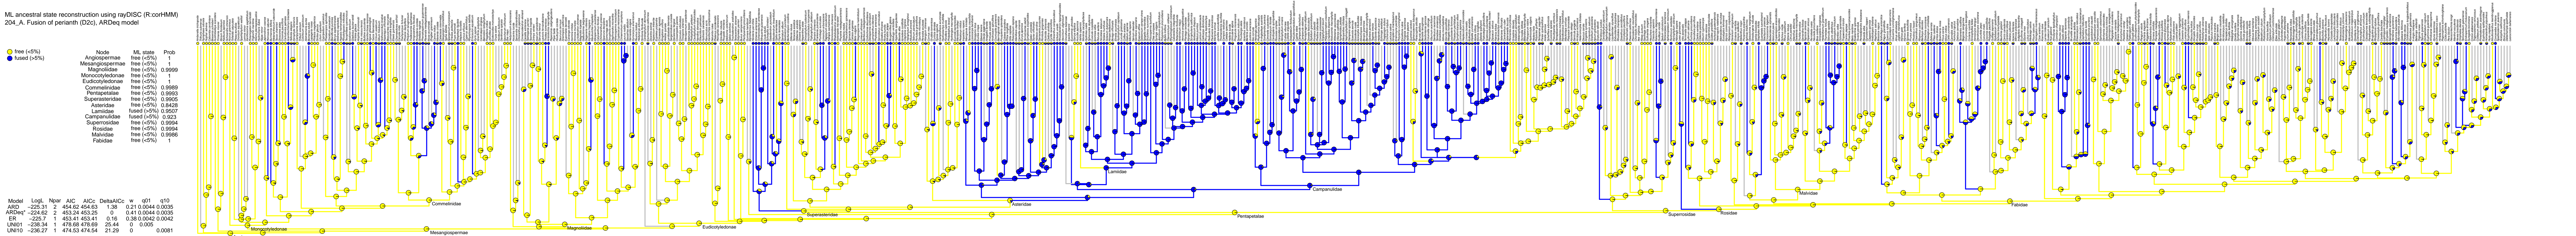



ML ancestral state reconstruction using rayDISC (R:corHMM)  
207\_A. Symmetry of perianth (binary) (D2d), ARDeq model

● actinomorphic  
● zygomorphic

| Node            | ML state      | Prob   |
|-----------------|---------------|--------|
| Angiospermae    | actinomorphic | 1      |
| Mesangiospermae | actinomorphic | 1      |
| Magnoliidae     | actinomorphic | 1      |
| Monocotyledonae | actinomorphic | 0.9998 |
| Eudicotyledonae | actinomorphic | 1      |
| Commelinidae    | actinomorphic | 0.9967 |
| Pentapetalae    | actinomorphic | 1      |
| Superasteridae  | actinomorphic | 1      |
| Asteridae       | actinomorphic | 1      |
| Lamiidae        | actinomorphic | 0.9965 |
| Campanulidae    | actinomorphic | 1      |
| Superrosidae    | actinomorphic | 1      |
| Rosidae         | actinomorphic | 1      |
| Malvidae        | actinomorphic | 0.9997 |
| Fabidae         | actinomorphic | 0.9999 |

| Model   | LogL    | Npar | AIC    | AICc   | DeltaAICc | w    | q01    | q10    |
|---------|---------|------|--------|--------|-----------|------|--------|--------|
| ARD     | -210.43 | 2    | 424.86 | 424.88 | 1.38      | 0.33 | 0.0014 | 0.0059 |
| ARDeq** | -209.74 | 2    | 423.48 | 423.5  | 0         | 0.66 | 0.0014 | 0.0059 |
| ER      | -218.72 | 1    | 439.44 | 439.45 | 15.95     | 0    | 0.0015 | 0.0015 |
| UNI01   | -261.41 | 1    | 524.82 | 524.82 | 101.33    | 0    | 0.0018 |        |
| UNI10   | -217.44 | 1    | 436.87 | 436.88 | 13.38     | 0    |        | 0.0166 |

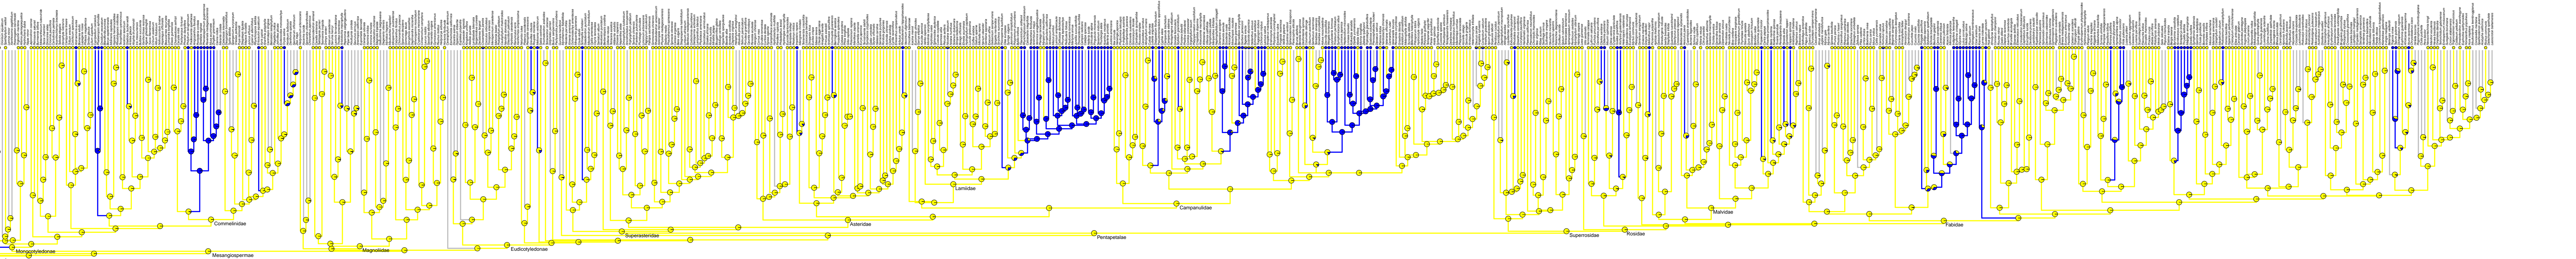



ML ancestral state reconstruction using rayDISC (R:corHMM)

301\_B. Number of fertile stamens (3-state) (D2c), ARDeq model

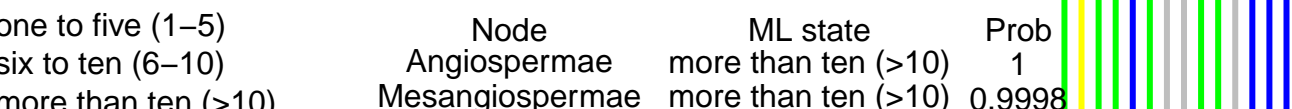

| Node            | ML state            | Prob   |
|-----------------|---------------------|--------|
| Angiospermae    | more than ten (>10) | 1      |
| Mesangiospermae | more than ten (>10) | 0.9998 |
| Magnoliidae     | more than ten (>10) | 1      |
| Monocotyledonae | six to ten (6-10)   | 0.5554 |
| Eudicotyledonae | more than ten (>10) | 1      |
| Commelinidae    | six to ten (6-10)   | 0.9996 |
| Pentapetalae    | more than ten (>10) | 1      |
| Superasteridae  | more than ten (>10) | 1      |
| Asteridae       | more than ten (>10) | 0.9994 |
| Lamiidae        | one to five (1-5)   | 0.9995 |
| Campanulidae    | one to five (1-5)   | 0.9966 |
| Superrosidae    | more than ten (>10) | 1      |
| Rosidae         | more than ten (>10) | 0.9999 |
| Malvidae        | more than ten (>10) | 0.9418 |
| Fabidae         | more than ten (>10) | 1      |

| Model   | LogL    | Npar | AIC     | AICc    | DeltaAICc | w    | q01    | ... |
|---------|---------|------|---------|---------|-----------|------|--------|-----|
| ARD     | -493.28 | 6    | 998.56  | 998.66  | 2.2       | 0.25 | 4e-04  | ... |
| ARDeq** | -492.18 | 6    | 996.36  | 996.47  | 0         | 0.75 | 4e-04  | ... |
| ER      | -538.35 | 1    | 1078.69 | 1078.7  | 82.23     | 0    | 0.0027 | ... |
| SYM     | -530.98 | 3    | 1067.96 | 1067.99 | 71.52     | 0    | 0.0039 | ... |
| SYMeq   | -530.13 | 3    | 1066.25 | 1066.28 | 69.82     | 0    | 0.0039 | ... |
| ORD     | -509.98 | 4    | 1027.96 | 1028.01 | 31.54     | 0    | 8e-04  | ... |
| ORDeq   | -509.41 | 4    | 1026.82 | 1026.87 | 30.4      | 0    | 8e-04  | ... |
| ORDSYM  | -534.65 | 2    | 1073.29 | 1073.31 | 76.84     | 0    | 0.0044 | ... |
| ORDSYMq | -533.73 | 2    | 1071.47 | 1071.49 | 75.02     | 0    | 0.0044 | ... |
| ORDER   | -534.68 | 1    | 1071.36 | 1071.37 | 74.9      | 0    | 0.0044 | ... |

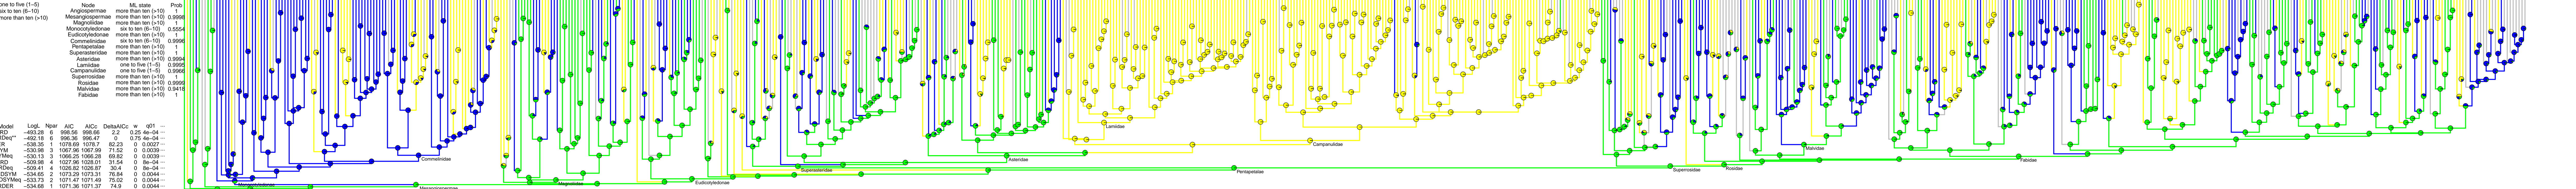

Supplement: Supplementary Data 17 [file ncomms16047-s18.pdf]
