# Supplementary material for: The ancestral flower of angiosperms and its early diversification
Source: Nat Commun. 2017 Aug 1;8:16047. doi: 10.1038/ncomms16047 (PMC5543309; doi:10.1038/ncomms16047)

ML ancestral state reconstruction using rayDISC (R:corHMM)  
 100\_A. Functional sex of flowers (D2d), ARDeq model

● bisexual
 ● unisexual

| Node            | ML state | Prob   |
|-----------------|----------|--------|
| Angiospermae    | bisexual | 1      |
| Mesangiospermae | bisexual | 1      |
| Magnoliidae     | bisexual | 1      |
| Monocotyledonae | bisexual | 1      |
| Eudicotyledonae | bisexual | 1      |
| Commelinidae    | bisexual | 1      |
| Pentapetalae    | bisexual | 1      |
| Superasteridae  | bisexual | 1      |
| Asteridae       | bisexual | 1      |
| Lamiidae        | bisexual | 1      |
| Campanulidae    | bisexual | 0.9996 |
| Superrosidae    | bisexual | 1      |
| Rosidae         | bisexual | 1      |

| Model            | LogL    | Npar | AIC    | AIC <sub>0.01</sub> | AIC <sub>0.05</sub> | AIC <sub>0.1</sub> | AIC <sub>0.2</sub> | AIC <sub>0.5</sub> | AIC <sub>1</sub> |
|------------------|---------|------|--------|---------------------|---------------------|--------------------|--------------------|--------------------|------------------|
| ARD              | -312.88 | 2    | 629.76 | 629.76              | 629.76              | 629.76             | 629.76             | 629.76             | 629.76           |
| ARD <sup>*</sup> | -312.25 | 2    | 628.49 | 628.49              | 628.49              | 628.49             | 628.49             | 628.49             | 628.49           |
| ER               | -315.45 | 1    | 632.9  | 632.91              | 632.91              | 632.91             | 632.91             | 632.91             | 632.91           |
| UNI01            | -313.53 | 1    | 629.06 | 629.07              | 629.07              | 629.07             | 629.07             | 629.07             | 629.07           |
| UNI10            | -360.51 | 1    | 723.01 | 723.02              | 723.02              | 723.02             | 723.02             | 723.02             | 723.02           |

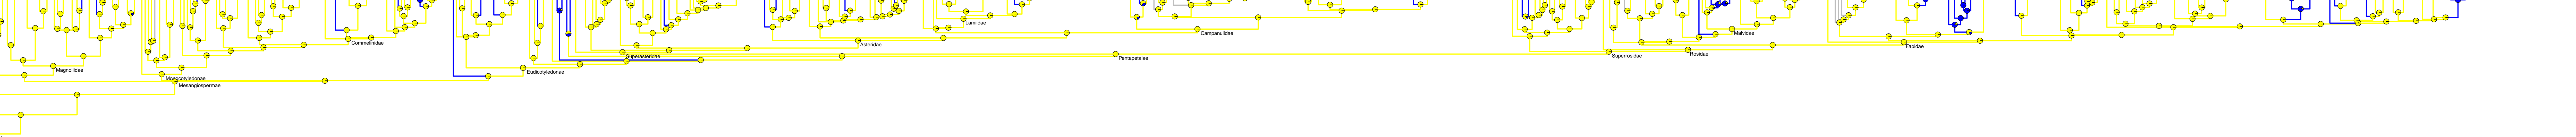



ML ancestral state reconstruction using rayDISC (R:corHMM)  
 100\_B. Structural sex of flowers (D2d), ARDeq model

● bisexual  
 ● unisexual

| Node            | ML state | Prob   |
|-----------------|----------|--------|
| Angiospermae    | bisexual | 0.9954 |
| Mesangiospermae | bisexual | 0.9997 |
| Magnoliidae     | bisexual | 0.9998 |
| Monocotyledonae | bisexual | 0.9998 |
| Eudicotyledonae | bisexual | 0.9999 |
| Commelinidae    | bisexual | 0.9999 |
| Pentapetalae    | bisexual | 1      |
| Superasteridae  | bisexual | 1      |
| Asteridae       | bisexual | 1      |
| Lamiidae        | bisexual | 0.9999 |
| Campanulidae    | bisexual | 1      |
| Superrosidae    | bisexual | 1      |
| Rosidae         | bisexual | 1      |

| Model   | LogL    | Npar | AIC    | AICc   | AICw   | AICd   | Bayes      | BF         |
|---------|---------|------|--------|--------|--------|--------|------------|------------|
| ARD     | -207.08 | 2    | 418.16 | 418.16 | 418.16 | 418.16 | 0.00000000 | 0.00000000 |
| ARDeq** | -206.68 | 2    | 417.35 | 417.37 | 417.37 | 417.37 | 0.55       | 0.0014     |
| ER      | -209.56 | 1    | 421.13 | 421.13 | 421.13 | 421.13 | 0.08       | 0.0015     |
| UNI01   | -224.83 | 1    | 451.65 | 451.66 | 451.66 | 451.66 | 34.29      | 0.0016     |
| UNI10   | -235.26 | 1    | 472.51 | 472.52 | 472.52 | 472.52 | 0          | 0.0155     |

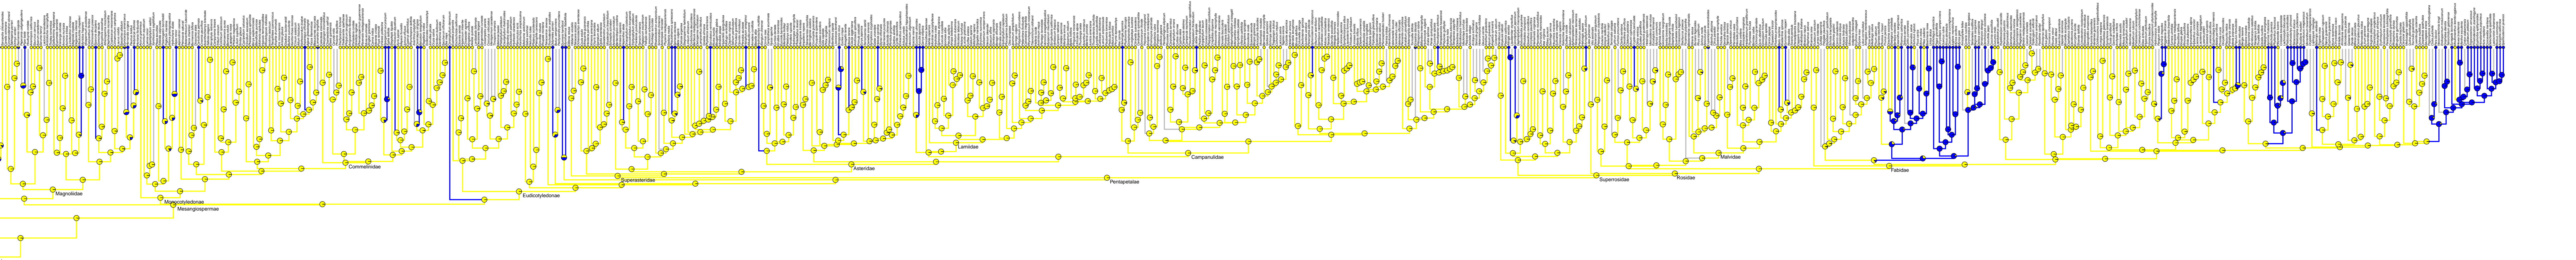



ML ancestral state reconstruction using rayDISC (R:corHMM)  
102\_B. Ovary position (binary) (D2d), ARDeq model

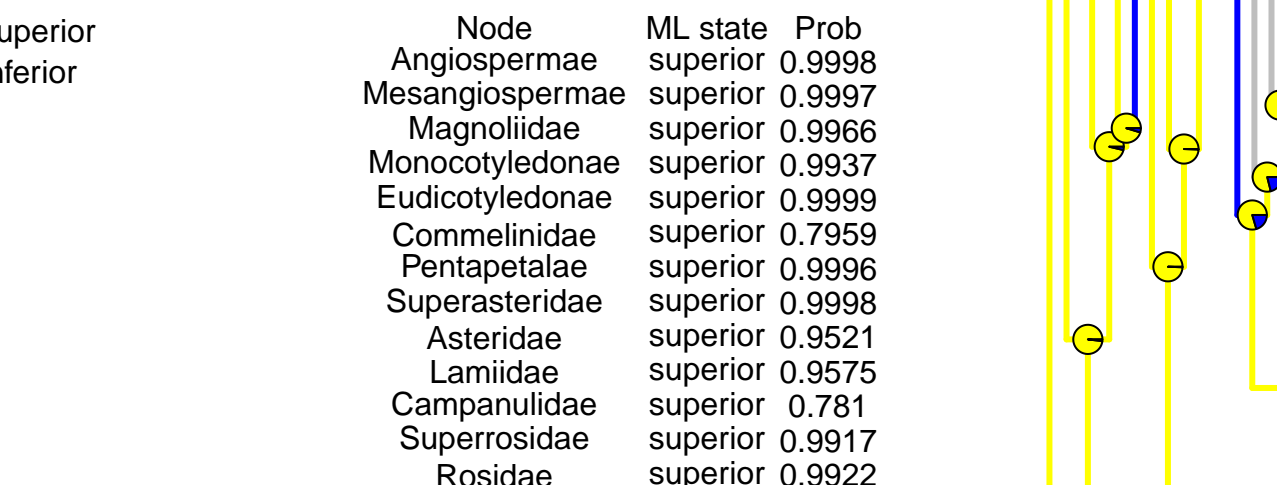

| Model   | LogL    | Npar | AIC    | ΔAIC   | Bayes factor | ΔAIC | Bayes factor |
|---------|---------|------|--------|--------|--------------|------|--------------|
| ARD     | -271.03 | 2    | 546.07 | 546.07 | 0            | 0.52 | 0.0019       |
| ARDeq** | -270.45 | 2    | 544.9  | 544.92 | 16           | 0.52 | 0.0019       |
| ER      | -272.51 | 1    | 547.03 | 547.03 | 2.12         | 0.18 | 0.0022       |
| UNI01   | -280.77 | 1    | 563.55 | 563.55 | 18.64        | 0    | 0.0025       |
| UNI10   | -298.66 | 1    | 599.33 | 599.33 | 54.41        | 0    | 0.0095       |

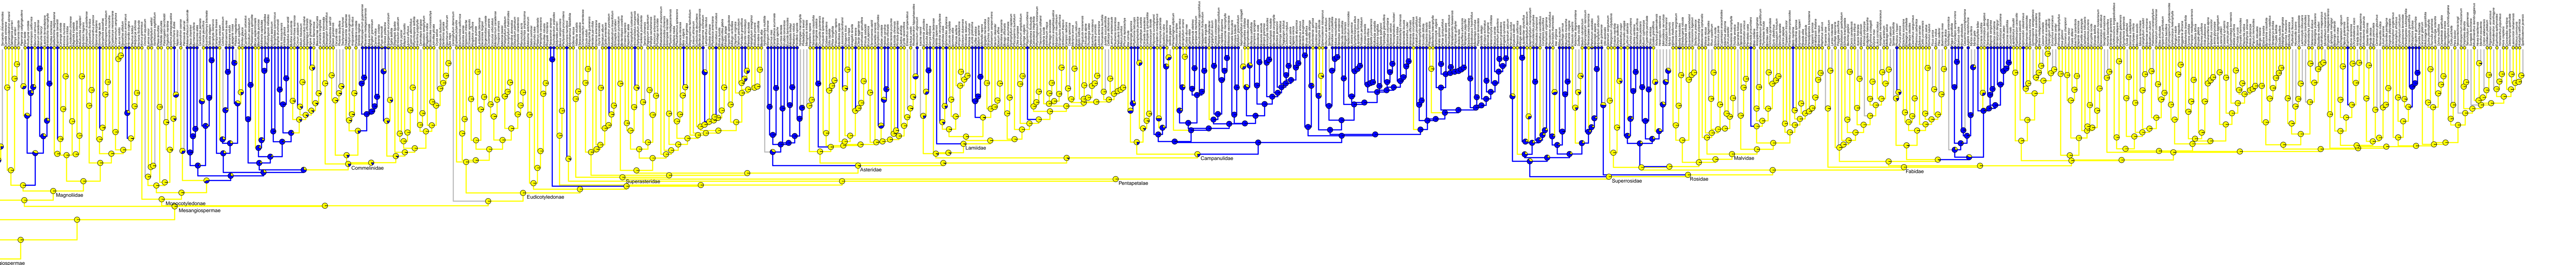



ML ancestral state reconstruction using rayDISC (R:corHMM)  
201\_A. Perianth presence (D2c), UNI10 model

● absent  
● present

| Node            | ML state | Prob |
|-----------------|----------|------|
| Angiospermae    | present  | 1    |
| Mesangiospermae | present  | 1    |
| Magnoliidae     | present  | 1    |
| Monocotyledonae | present  | 1    |
| Eudicotyledonae | present  | 1    |
| Commelinidae    | present  | 1    |
| Pentapetalae    | present  | 1    |
| Superasteridae  | present  | 1    |
| Asteridae       | present  | 1    |
| Lamiidae        | present  | 1    |
| Campanulidae    | present  | 1    |
| Superrosidae    | present  | 1    |
| Rosidae         | present  | 1    |

| Model             | LogL    | Npar | AIC    | AIC <sub>Δ</sub> | AIC <sub>Δ</sub> /IC | weight | IC <sub>95%</sub> |
|-------------------|---------|------|--------|------------------|----------------------|--------|-------------------|
| ARD               | -95.9   | 2    | 195.8  | 195.82           | 0.02                 | 0.99   | 5e-04             |
| ARD <sub>eq</sub> | -95.21  | 2    | 194.41 | 194.43           | 0.62                 | 0.25   | 5e-04             |
| ER                | -96.13  | 1    | 194.26 | 194.26           | 0.45                 | 0.28   | 5e-04             |
| UNI01             | -113.81 | 1    | 229.62 | 229.63           | 35.82                | 0      | 0.0201            |
| UNI01*            | -95.9   | 1    | 193.8  | 193.81           | 0                    | 0.35   | 5e-04             |

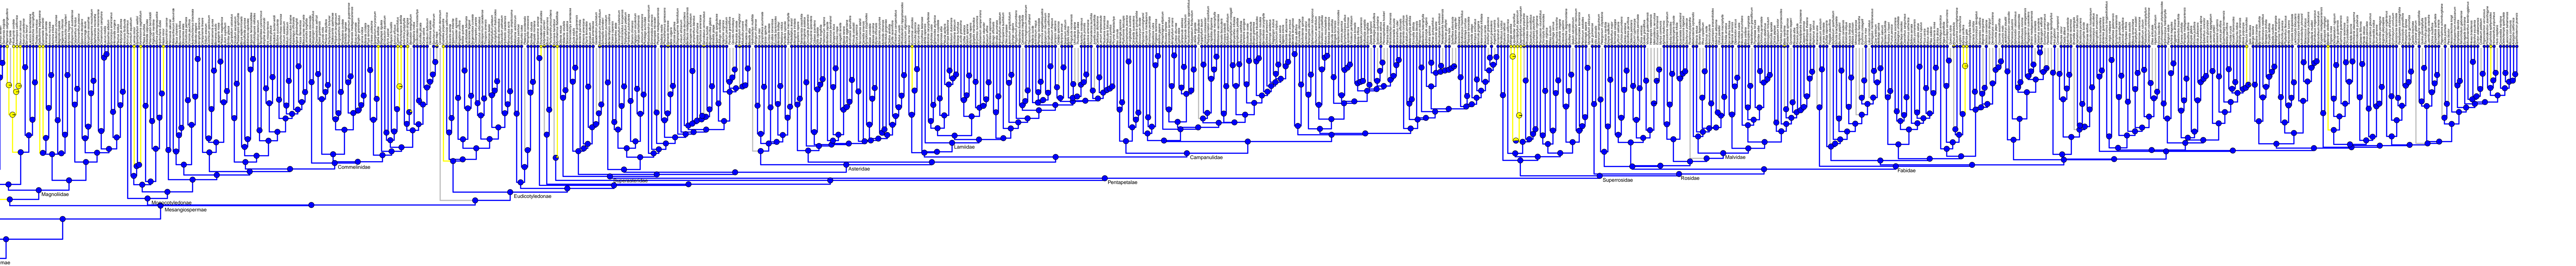



ML ancestral state reconstruction using rayDISC (R:corHMM)  
201\_B. Number of perianth parts (3-state) (D2c), ARDeq model

● one to five (1–5)  
● six to ten (6–10)  
● more than ten (>10)

|         | Node            | ML state            | Prob   |
|---------|-----------------|---------------------|--------|
|         | Angiospermae    | more than ten (>10) | 1      |
|         | Mesangiospermae | more than ten (>10) | 0.999  |
|         | Magnoliidae     | more than ten (>10) | 0.9994 |
|         | Monocotyledonae | six to ten (6–10)   | 0.5374 |
|         | Eudicotyledonae | more than ten (>10) | 0.9866 |
|         | Commelinidae    | six to ten (6–10)   | 0.9999 |
|         | Pentapetalae    | six to ten (6–10)   | 0.9931 |
|         | Superasteridae  | six to ten (6–10)   | 0.9966 |
| Model   | LogL            | Npar                | AIC    |
| ARD     | –330.02         | 6                   | 672.03 |
| ARDeq** | –328.96         | 6                   | 669.06 |
| ER      | –356.53         | 1                   | 715.05 |
| SYM     | –344.45         | 3                   | 694.89 |
| SYMeq   | –343.6          | 3                   | 693.19 |
| ORD     | –335.62         | 4                   | 679.25 |
| ORDeq   | –334.55         | 4                   | 677.11 |
| ORDSYM  | –347.04         | 2                   | 698.09 |
| ORDSYMq | –346.29         | 2                   | 696.57 |
| ORDER   | –357.37         | 1                   | 716.75 |

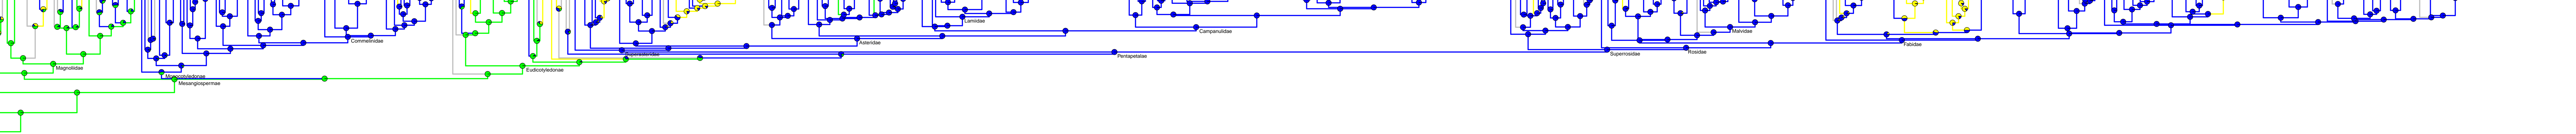



01\_C. Number of perianth parts (binary) (D2c), ARDeq model

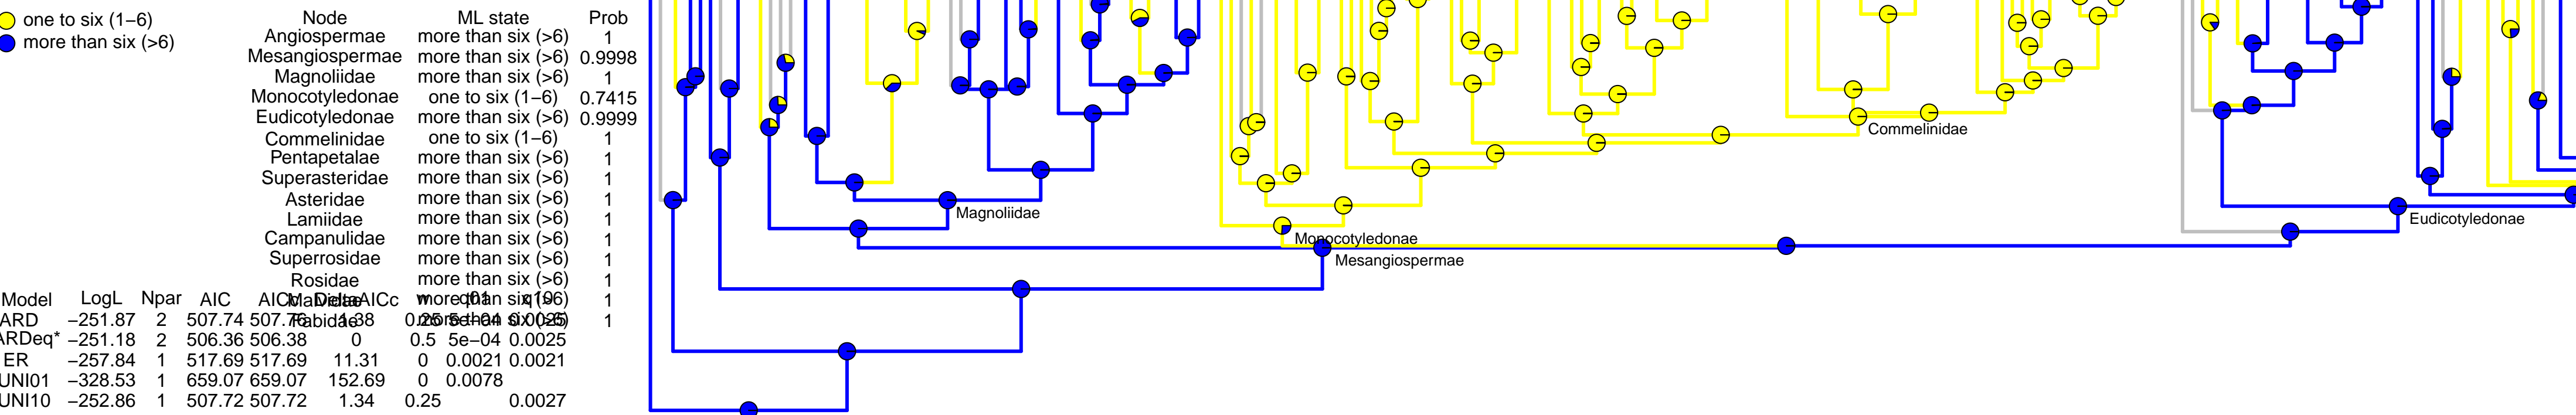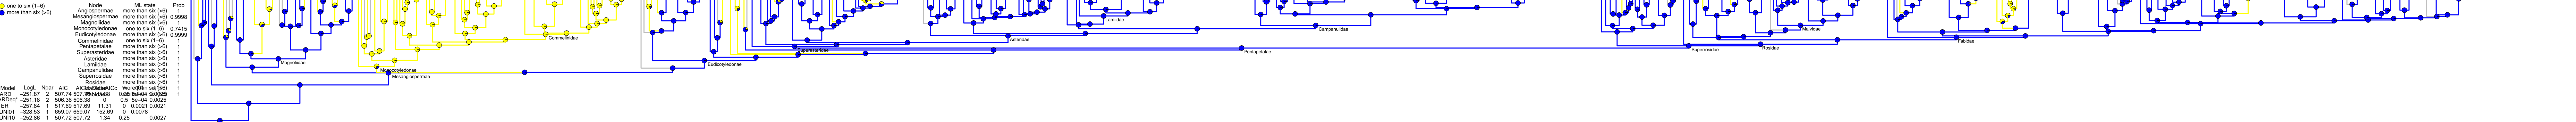



ML ancestral state reconstruction using rayDISC (R:corHMM)  
 230\_A. Perianth phyllotaxy (binary) (D2d), ARDeq model

● whorled  
 ● spiral

|                   | Node            | ML state | Prob   |  |
|-------------------|-----------------|----------|--------|--|
| whorled<br>spiral | Angiospermae    | spiral   | 1      |  |
|                   | Mesangiospermae | spiral   | 0.9997 |  |
|                   | Magnoliidae     | spiral   | 0.9975 |  |
|                   | Monocotyledonae | spiral   | 0.514  |  |
|                   | Eudicotyledonae | spiral   | 0.998  |  |
|                   | Commelinidae    | whorled  | 0.9999 |  |
|                   | Pentapetalae    | whorled  | 0.9876 |  |
|                   | Superasteridae  | whorled  | 0.9919 |  |
|                   | Asteridae       | whorled  | 0.9996 |  |
|                   | Lamiidae        | whorled  | 1      |  |
|                   | Campanulidae    | whorled  | 1      |  |
|                   | Superrosidae    | whorled  | 0.9943 |  |
|                   | Rosidae         | whorled  | 0.9963 |  |
|                   |                 |          |        |  |

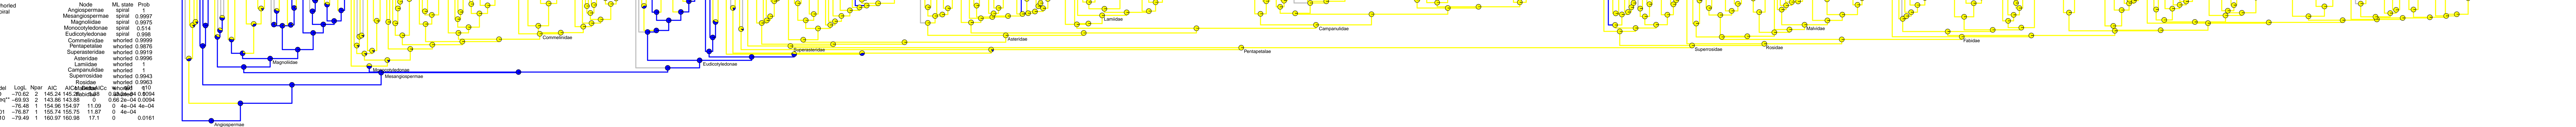



ML ancestral state reconstruction using rayDISC (R:corHMM)  
231\_A. Number of perianth whorls (D2c), ARDeq model

● one (1)  
● two (2)  
● more than two (>2)

| Model   | LogL    | Npar | AIC    | ΔAIC   | wt    | 0.1  | 0.2    | 0.5 | 1   |
|---------|---------|------|--------|--------|-------|------|--------|-----|-----|
| ARD     | -269.55 | 6    | 551.09 | 5.17   | 0.25  | 0.02 | 0.17   | ... | ... |
| ARD**   | -268.46 | 6    | 548.25 | 0.00   | 0.75  | 0.02 | 0.17   | ... | ... |
| ER      | -311.54 | 1    | 625.07 | 66.05  | 0.00  | 0.01 | ...    | ... | ... |
| SYM     | -292.58 | 3    | 591.16 | 33.01  | 0.00  | 0.19 | ...    | ... | ... |
| SYMeq   | -292.09 | 3    | 590.18 | 21.09  | 0.00  | 0.18 | ...    | ... | ... |
| ORD     | -277.79 | 4    | 563.58 | 14.6   | 0.00  | 0.04 | ...    | ... | ... |
| ORDeq   | -276.7  | 4    | 561.39 | 561.44 | 12.42 | 0    | 0.0018 | ... | ... |
| ORDSYM  | -300.34 | 2    | 604.69 | 604.7  | 55.68 | 0    | 0.0018 | ... | ... |
| ORDSYMq | -299.54 | 2    | 603.07 | 603.09 | 54.06 | 0    | 0.0018 | ... | ... |
| ORDER   | -316.28 | 1    | 634.55 | 634.56 | 85.53 | 0    | 0.0011 | ... | ... |

| Node            | ML state           | Prob   |
|-----------------|--------------------|--------|
| Angiospermae    | more than two (>2) | 1      |
| Mesangiospermae | more than two (>2) | 0.9994 |
| Magnoliidae     | more than two (>2) | 1      |
| Monocotyledonae | two (2)            | 0.6671 |
| Eudicotyledonae | more than two (>2) | 0.984  |
| Commelinidae    | two (2)            | 1      |
| Pentapetalae    | two (2)            | 0.996  |
| Superasteridae  | two (2)            | 0.993  |
| Aspladaceae     | two (2)            | 0.998  |
| Aspladaceae     | two (2)            | 0.999  |
| Aspladaceae     | two (2)            | 1      |

| Model   | LogL    | Npar | AIC    | ΔAIC   | wt    | 0.1  | 0.2    | 0.5 | 1   |
|---------|---------|------|--------|--------|-------|------|--------|-----|-----|
| ARD     | -269.55 | 6    | 551.09 | 5.17   | 0.25  | 0.02 | 0.17   | ... | ... |
| ARD**   | -268.46 | 6    | 548.25 | 0.00   | 0.75  | 0.02 | 0.17   | ... | ... |
| ER      | -311.54 | 1    | 625.07 | 66.05  | 0.00  | 0.01 | ...    | ... | ... |
| SYM     | -292.58 | 3    | 591.16 | 33.01  | 0.00  | 0.19 | ...    | ... | ... |
| SYMeq   | -292.09 | 3    | 590.18 | 21.09  | 0.00  | 0.18 | ...    | ... | ... |
| ORD     | -277.79 | 4    | 563.58 | 14.6   | 0.00  | 0.04 | ...    | ... | ... |
| ORDeq   | -276.7  | 4    | 561.39 | 561.44 | 12.42 | 0    | 0.0018 | ... | ... |
| ORDSYM  | -300.34 | 2    | 604.69 | 604.7  | 55.68 | 0    | 0.0018 | ... | ... |
| ORDSYMq | -299.54 | 2    | 603.07 | 603.09 | 54.06 | 0    | 0.0018 | ... | ... |
| ORDER   | -316.28 | 1    | 634.55 | 634.56 | 85.53 | 0    | 0.0011 | ... | ... |

Angiospermae

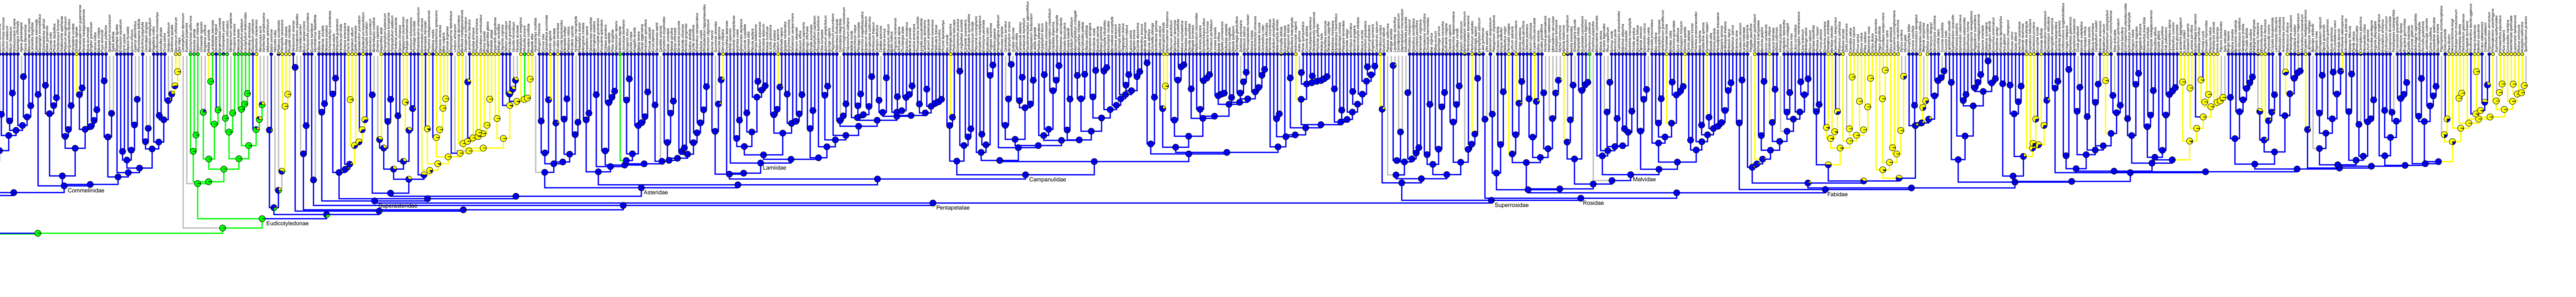



ML ancestral state reconstruction using rayDISC (R:corHMM)  
232\_A. Perianth merism (4-state) (D2c), SYMeq model

● dimerous  
● trimerous  
● tetramerous  
● pentamerous

| Model    | LogL    | Npar | AIC    | ΔAIC   | DeltaAIC | Penalty | Penalty | Penalty |
|----------|---------|------|--------|--------|----------|---------|---------|---------|
| ARD      | -322.95 | 12   | 669.89 | 670.24 | 5.92     | 0.0000  | 0.0000  | 0.0000  |
| ARDeq    | -321.84 | 12   | 667.68 | 668.03 | 5.71     | 0.0000  | 0.0000  | 0.0000  |
| ER       | -362.02 | 1    | 726.04 | 726.39 | 1.67     | 0.0000  | 0.0000  | 0.0000  |
| SYM      | -327.4  | 6    | 666.8  | 667.15 | 2.54     | 0.0000  | 0.0000  | 0.0000  |
| SYMeq**  | -326.13 | 6    | 664.26 | 664.61 | 0        | 0.0000  | 0.0000  | 0.0000  |
| ORD      | -337.6  | 6    | 687.2  | 687.55 | 22.9     | 0.0000  | 0.0000  | 0.0000  |
| ORDeq    | -336.69 | 6    | 685.38 | 685.73 | 21.11    | 0       | 0       | 0       |
| ORDSYM   | -346.2  | 3    | 698.39 | 698.42 | 34.05    | 0       | 0.0019  | ...     |
| ORDSYMeq | -345.06 | 3    | 696.11 | 696.14 | 31.77    | 0       | 0.0019  | ...     |
| ORDER    | -348.11 | 1    | 698.22 | 698.22 | 33.85    | 0       | 0.0024  | ...     |

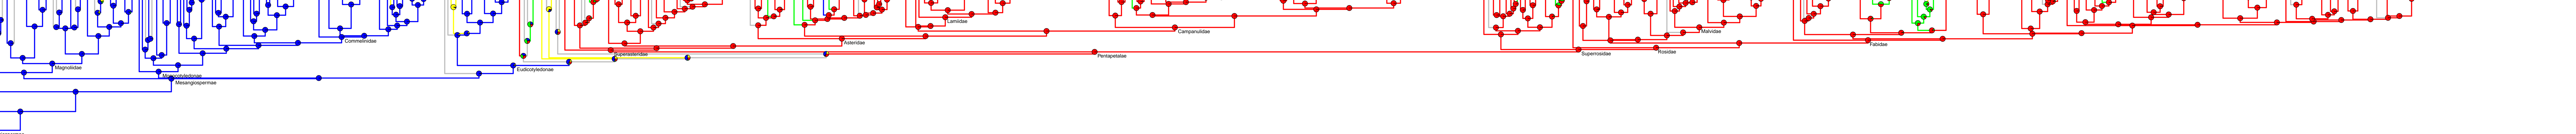

MP ancestral state reconstruction using ancestral.pars  
(R:phangorn)  
232\_B. Perianth merism (3-state) (D2c), 70 steps

- |                                                                                                     |                                                                                                                                                                                                                                                                                                                                                                               |                                                                                                                                                                                                                                                                                                                                              |
|-----------------------------------------------------------------------------------------------------|-------------------------------------------------------------------------------------------------------------------------------------------------------------------------------------------------------------------------------------------------------------------------------------------------------------------------------------------------------------------------------|----------------------------------------------------------------------------------------------------------------------------------------------------------------------------------------------------------------------------------------------------------------------------------------------------------------------------------------------|
| <div><div></div>trimerous</div> <div><div></div>tetramerous</div> <div><div></div>pentamerous</div> | <div>Node</div> <div>Angiospermae</div> <div>Mesangiospermae</div> <div>Magnoliidae</div> <div>Monocotyledonae</div> <div>Eudicotyledonae</div> <div>Commelinidae</div> <div>Pentapetalae</div> <div>Superasteridae</div> <div>Asteridae</div> <div>Lamiidae</div> <div>Campanulidae</div> <div>Superrosidae</div> <div>Rosidae</div> <div>Malvaceae</div> <div>Fabidae</div> | <div>MP state(s)</div> <div>trimerous</div> <div>trimerous</div> <div>trimerous</div> <div>trimerous</div> <div>trimerous</div> <div>trimerous</div> <div>pentamerous</div> <div>pentamerous</div> <div>pentamerous</div> <div>pentamerous</div> <div>pentamerous</div> <div>pentamerous</div> <div>pentamerous</div> <div>pentamerous</div> |
|-----------------------------------------------------------------------------------------------------|-------------------------------------------------------------------------------------------------------------------------------------------------------------------------------------------------------------------------------------------------------------------------------------------------------------------------------------------------------------------------------|----------------------------------------------------------------------------------------------------------------------------------------------------------------------------------------------------------------------------------------------------------------------------------------------------------------------------------------------|

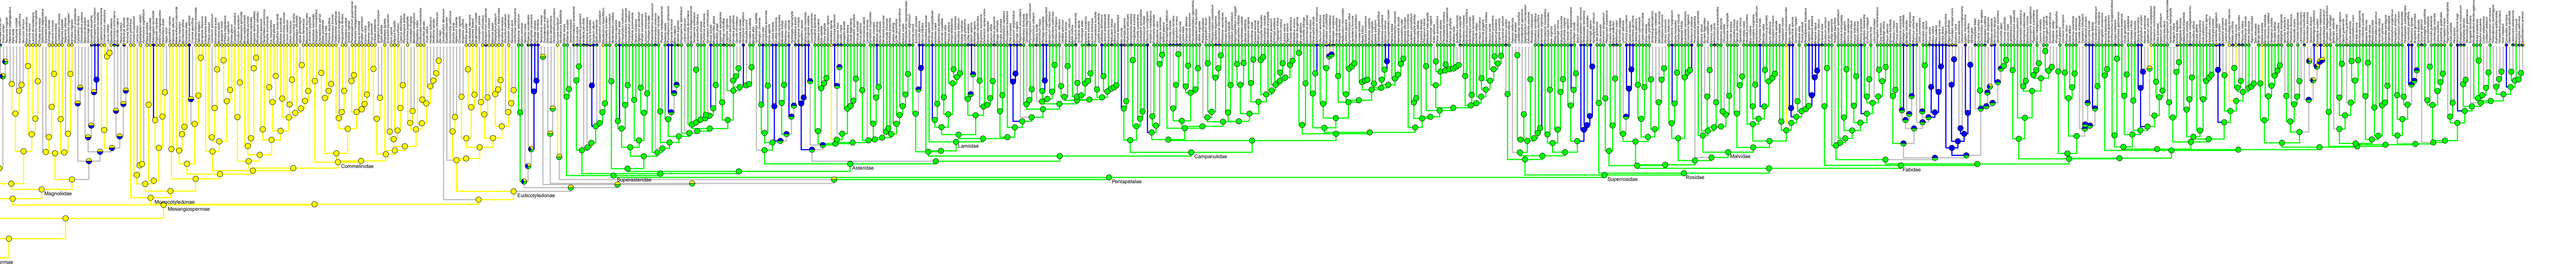

ML ancestral state reconstruction using rayDISC (R:corHMM)  
 232\_B. Perianth merism (3-state) (D2c), SYMeq model

● trimerous  
● tetramerous  
● pentamerous

| Node            | ML state    | Prob   |
|-----------------|-------------|--------|
| Angiospermae    | trimerous   | 1      |
| Mesangiospermae | trimerous   | 1      |
| Magnoliidae     | trimerous   | 1      |
| Monocotyledonae | trimerous   | 1      |
| Eudicotyledonae | trimerous   | 0.9574 |
| Commelinidae    | trimerous   | 1      |
| Pentapetalae    | pentamerous | 0.9996 |
| Superasteridae  | pentamerous | 0.9999 |

| Model    | LogL    | Npar | AIC    | Delta AIC | Bayes Factor | Posterior Prob |
|----------|---------|------|--------|-----------|--------------|----------------|
| ARD      | -256.75 | 6    | 525.5  | 5.5       | 1.0          | 0.999          |
| ARDeq    | -255.83 | 6    | 523.6  | 3.9       | 1.0          | 0.999          |
| ER       | -282.3  | 1    | 566.5  | 40.0      | 0.0          | 0.001          |
| SYM      | -257.93 | 3    | 519.8  | 5.7       | 2.06         | 0.954          |
| SYMeq*   | -256.9  | 3    | 521.8  | 4.9       | 0            | 0.954          |
| ORD      | -256.97 | 4    | 521.93 | 5.2       | 2.16         | 0.954          |
| ORDeq    | -256.08 | 4    | 520.15 | 3.4       | 0.28         | 0.994          |
| ORDSYM   | -260.53 | 2    | 525.05 | 9.5       | 5.24         | 0.0014         |
| ORDSYMeq | -259.53 | 2    | 523.06 | 7.5       | 3.25         | 0.0014         |
| ORDER    | -263.17 | 1    | 528.33 | 15.3      | 8.51         | 0.0023         |

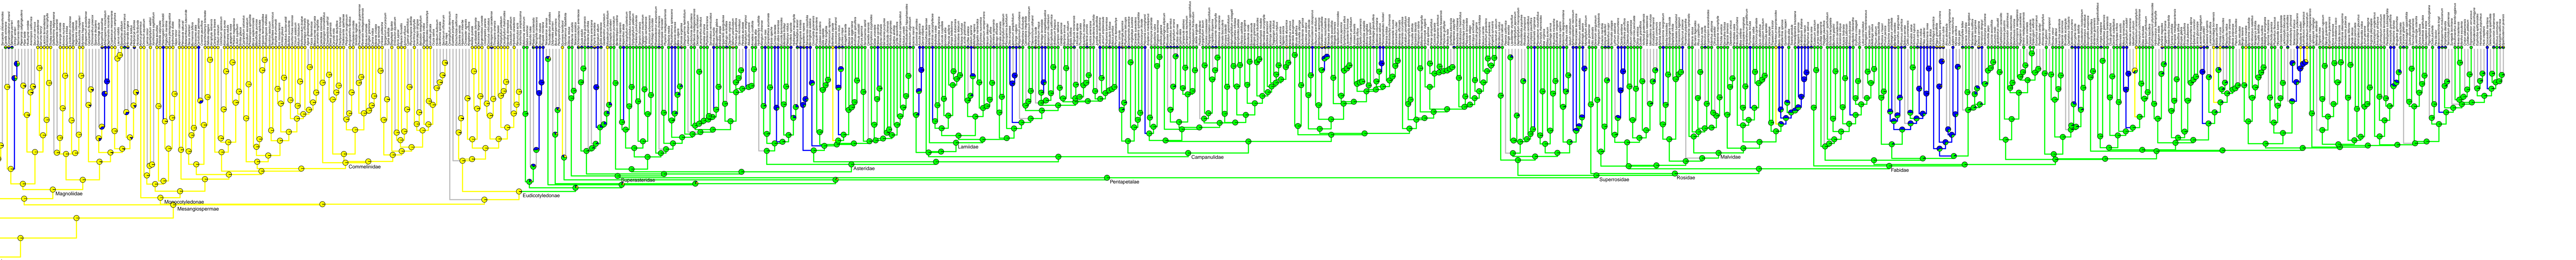



34\_A. Perianth differentiation (binary) (D2d), ARDeq model

| Model  | LogL    | Npar | AIC    | AICc   | AICc <sub>adj</sub> | AICc <sub>adj</sub> | Difference | Relative |
|--------|---------|------|--------|--------|---------------------|---------------------|------------|----------|
| ARD    | -198.71 | 2    | 401.43 | 401.43 | 401.43              | 0.0000              | 100.00     |          |
| RDeq** | -198.06 | 2    | 400.13 | 400.14 | 400.14              | 0.66                | 0.0041     |          |
| ER     | -207.3  | 1    | 416.59 | 416.6  | 416.6               | 16.46               | 0.0024     |          |
| UNI01  | -231.39 | 1    | 464.78 | 464.79 | 464.79              | 64.65               | 0.0083     |          |
| UNI10  | -233.32 | 1    | 468.64 | 468.65 | 468.65              | 68.51               | 0.0032     |          |

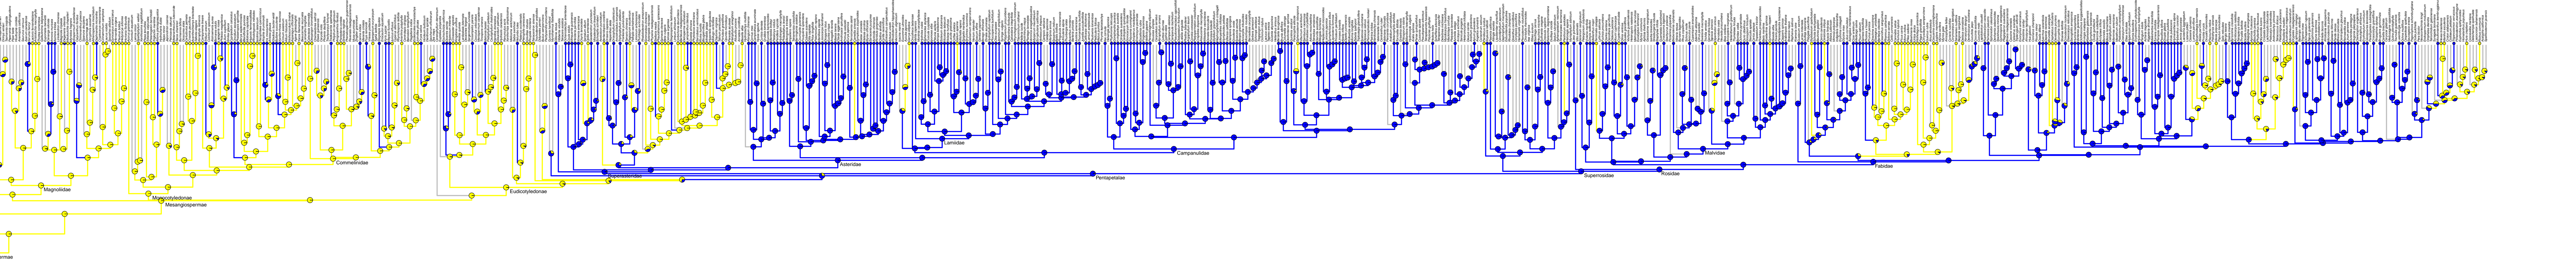

MP ancestral state reconstruction using ancestral.pars  
(R:phangorn)  
204\_A. Fusion of perianth (D2c), 76 steps

● free (<5%)  
● fused (>5%)

|                 |             |
|-----------------|-------------|
| Node            | MP state(s) |
| Angiospermae    | free (<5%)  |
| Mesangiospermae | free (<5%)  |
| Magnoliidae     | free (<5%)  |
| Monocotyledonae | free (<5%)  |
| Eudicotyledonae | free (<5%)  |
| Commelinidae    | free (<5%)  |
| Pentapetalae    | free (<5%)  |
| Superasteridae  | free (<5%)  |
| Asteridae       | free (<5%)  |
| Lamiidae        | free (<5%)  |
| Campanulidae    | fused (>5%) |
| Superrosidae    | free (<5%)  |
| Rosidae         | free (<5%)  |
| Malvaceae       | free (<5%)  |
| Fabidae         | free (<5%)  |

Magnoliidae

Monocotyledonae

Mesangiospermae

Commelinidae

Superasteridae

Asteridae

Lamiidae

Campanulidae

Superrosidae

Rosidae

Malvaceae

Fabidae

Superrosidae

Rosidae

Malvaceae

Fabidae

ML ancestral state reconstruction using rayDISC (R:corHMM)  
204\_A. Fusion of perianth (D2c), ER model

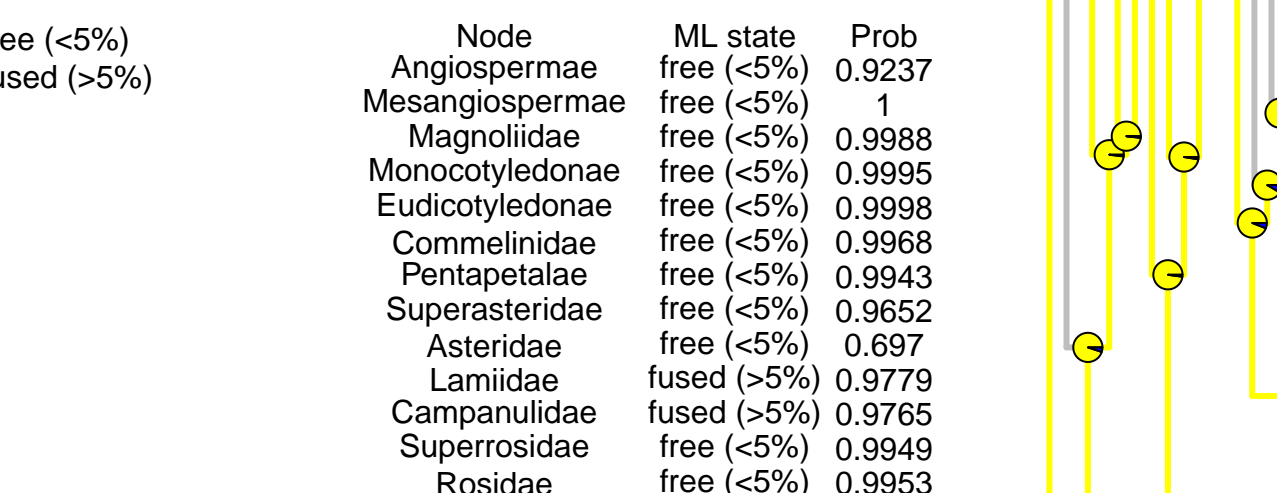

| Model             | LogL    | Npar | AIC    | AIC <sub>CM</sub> | AIC <sub>IC</sub> | ΔAIC <sub>CM</sub> | ΔAIC <sub>IC</sub> | ΔAIC <sub>IC</sub> | ΔAIC <sub>IC</sub> |
|-------------------|---------|------|--------|-------------------|-------------------|--------------------|--------------------|--------------------|--------------------|
| ARD               | -225.72 | 2    | 455.45 | 455.45            | 455.45            | 0.00               | 0.00               | 0.00               | 0.00               |
| ARD <sub>eq</sub> | -225.16 | 2    | 454.31 | 454.33            | 0.55              | 0.35               | 0.0041             | 0.0035             | 0.0035             |
| ER*               | -225.89 | 1    | 453.77 | 453.78            | 0                 | 0.46               | 0.004              | 0.004              | 0.004              |
| UNI01             | -241    | 1    | 484    | 484               | 30.23             | 0                  | 0.0046             |                    |                    |
| UNI10             | -237.57 | 1    | 477.15 | 477.15            | 23.38             | 0                  | 0.0078             |                    |                    |

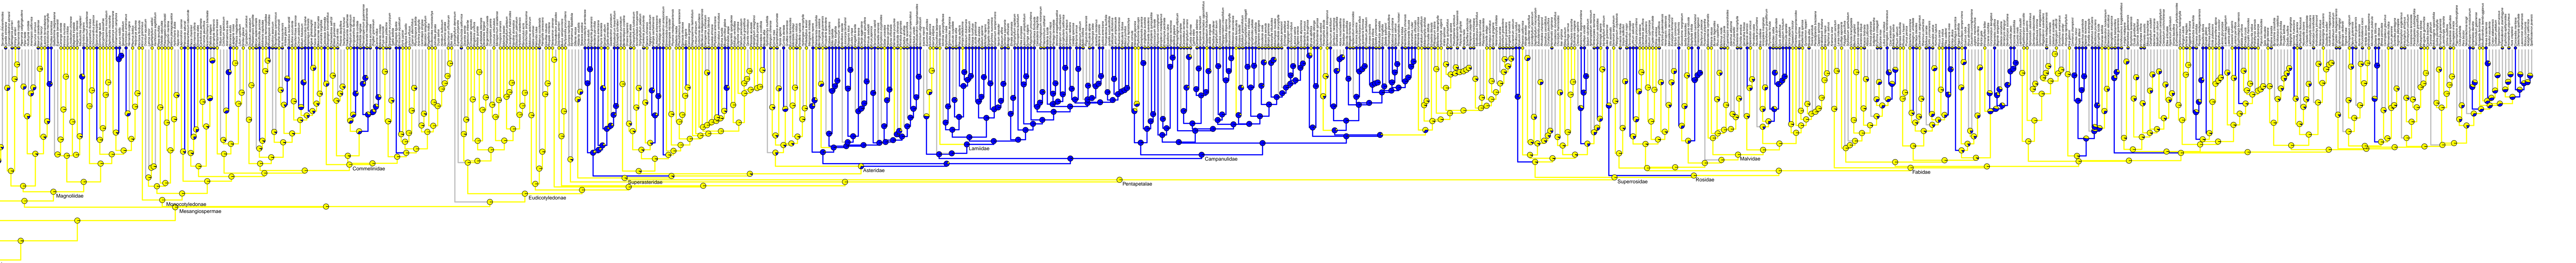





MP ancestral state reconstruction using ancestral.pars  
(301\_B. Number of fertile stamens (3-state) (D2c), 155 steps

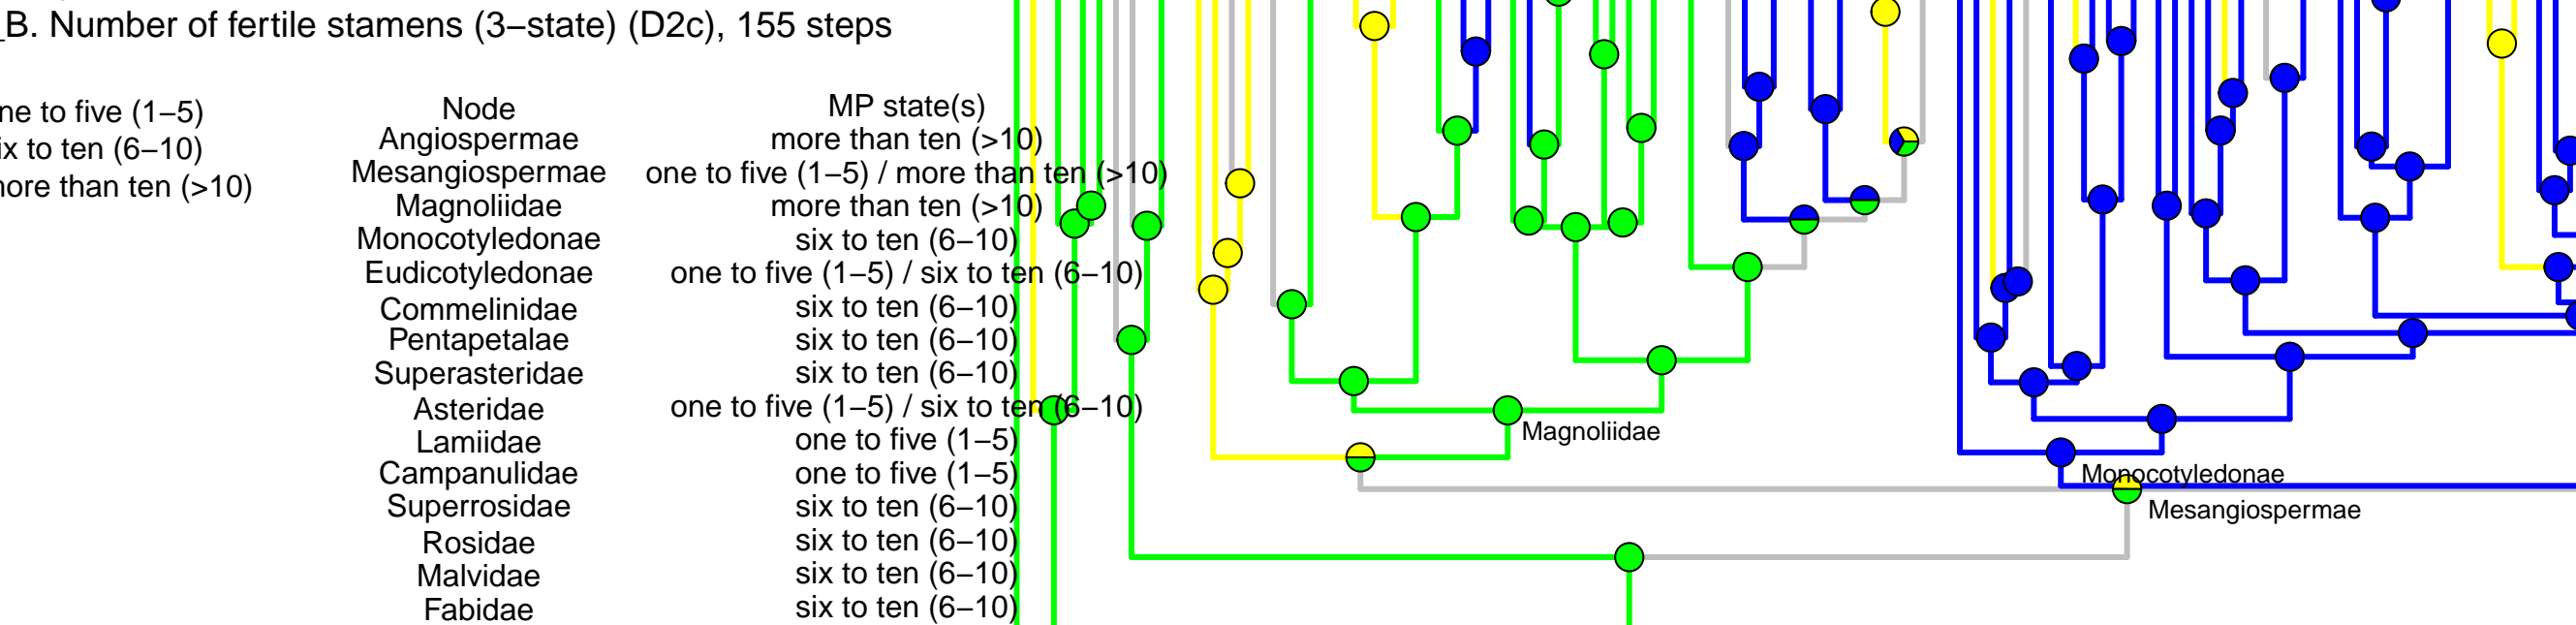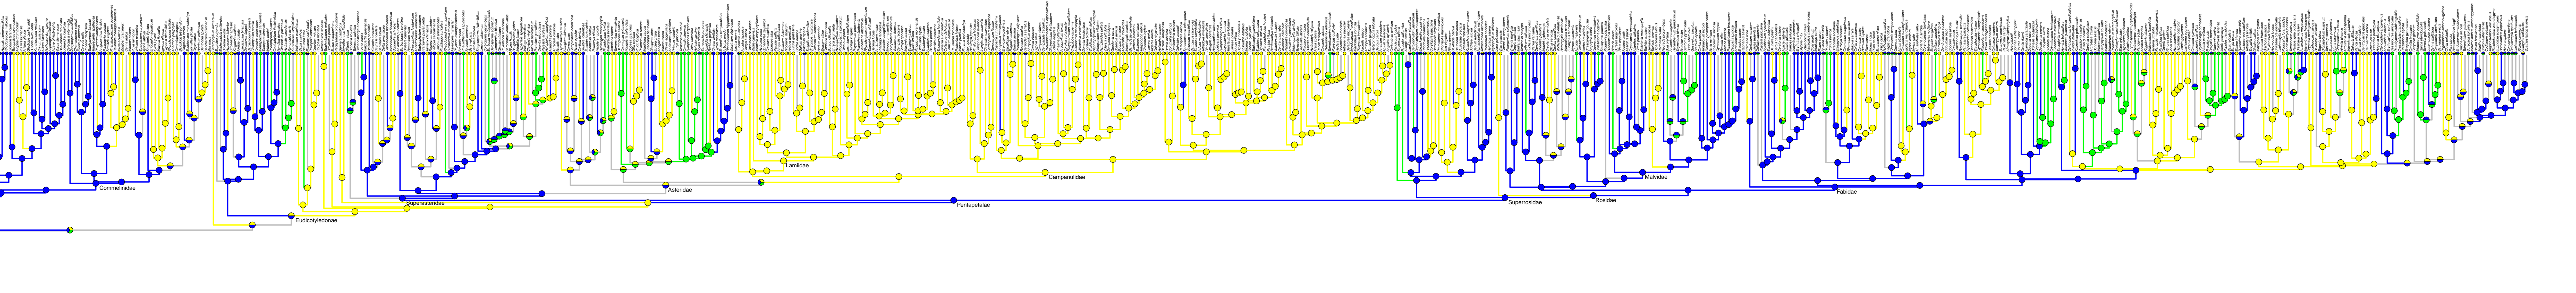

ML ancestral state reconstruction using rayDISC (R:corHMM)  
301\_B. Number of fertile stamens (3-state) (D2c), ARDeq model

● one to five (1–5)  
● six to ten (6–10)  
● more than ten (>10)

| Model    | LogL    | Npar | AIC     | AICc    | Delta AIC | Delta AICc | Prob   |
|----------|---------|------|---------|---------|-----------|------------|--------|
| ARD      | −495.2  | 6    | 1002.4  | 1002.6  | 2.16      | 0.02       | 0.9995 |
| ARD**    | −494.12 | 6    | 1002.3  | 1002.5  | 2.16      | 0.02       | 0.9995 |
| ER       | −533.11 | 1    | 1068.2  | 1068.2  | 67.90     | 0.00       | 1      |
| SYM      | −528.41 | 3    | 1062.8  | 1062.5  | 62.40     | 0.00       | 0.9999 |
| SYMeq    | −528.16 | 3    | 1062.3  | 1062.4  | 62.40     | 0.00       | 0.9453 |
| ORD      | −508.42 | 4    | 1024.8  | 1024.9  | 24.06     | 0.00       | 0.9999 |
| ORDeq    | −507.88 | 4    | 1023.75 | 1023.8  | 23.46     | 0          | 7e−04  |
| ORDSYM   | −532.73 | 2    | 1069.47 | 1069.48 | 69.14     | 0          | 0.0041 |
| ORDSYMeq | −532.73 | 2    | 1068.76 | 1068.77 | 68.44     | 0          | 0.0041 |
| ORDER    | −532.74 | 1    | 1067.48 | 1067.48 | 67.14     | 0          | 0.0042 |

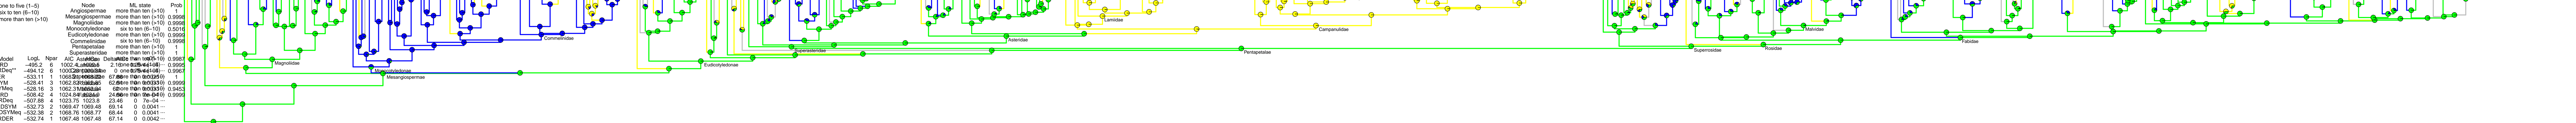



ML ancestral state reconstruction using rayDISC (R:corHMM)  
 301\_C. Number of fertile stamens (binary) (D2c), ARDeq model

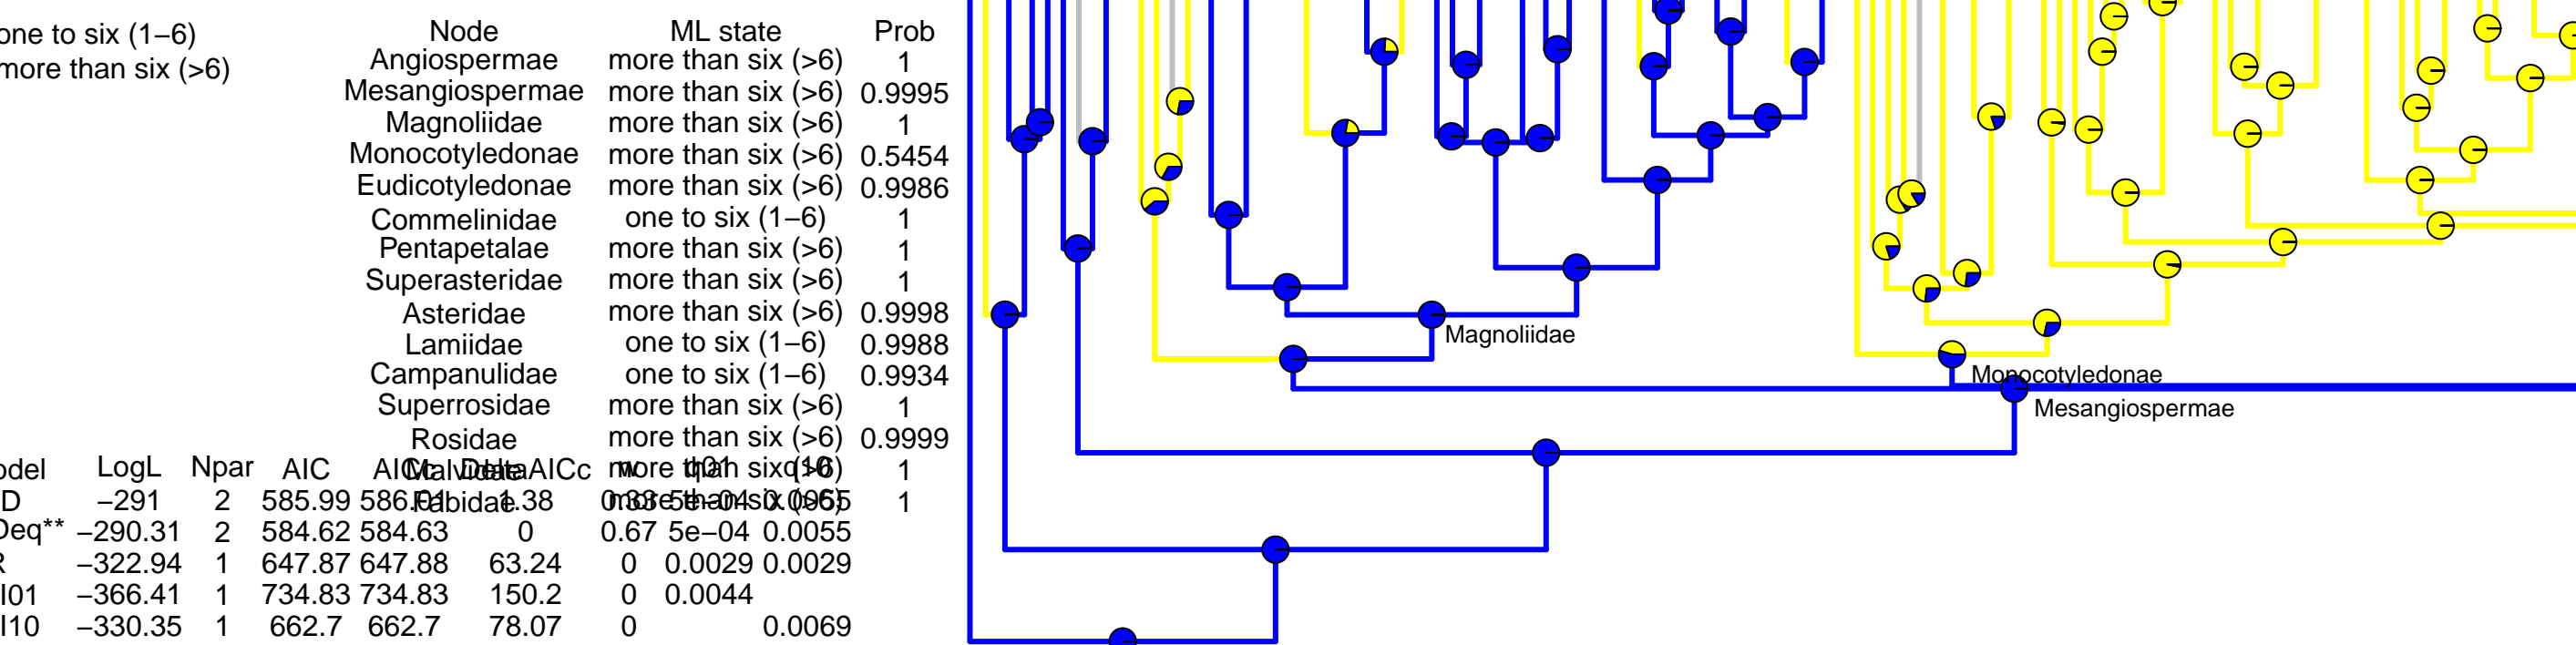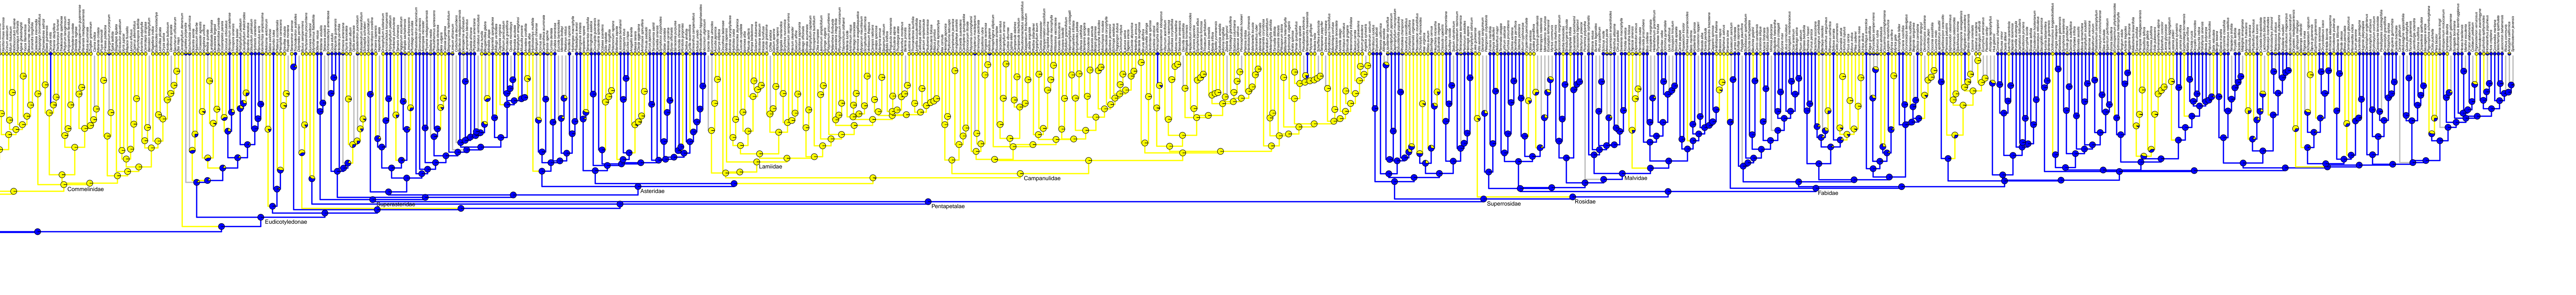



ML ancestral state reconstruction using rayDISC (R:corHMM)  
 330\_A. Androecium structural phyllotaxy (binary) (D2d), ARD model

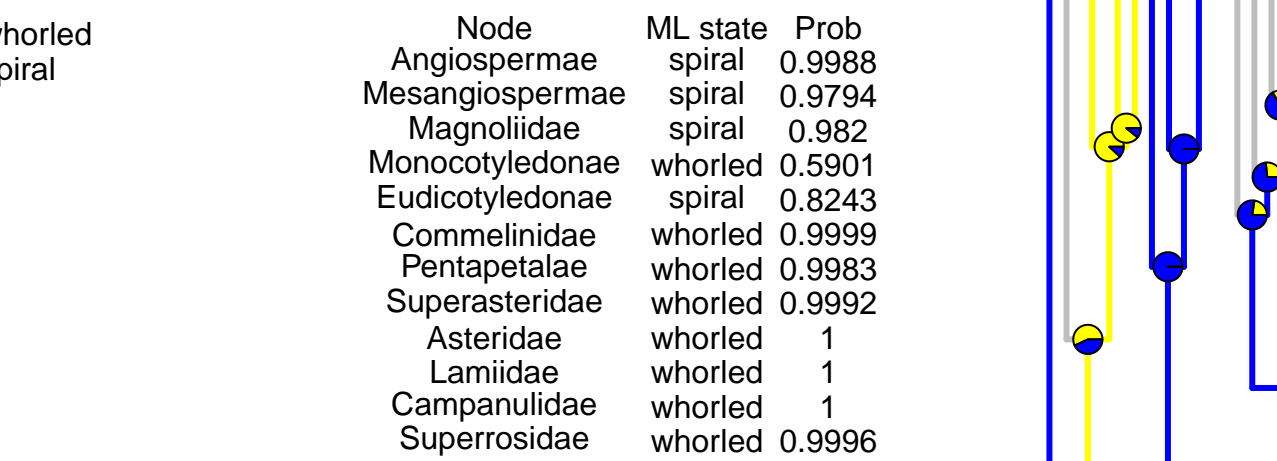

| Model | LogL   | Npar | AIC    | AICc   | ΔAIC  | ΔAICc | w     | q10    |
|-------|--------|------|--------|--------|-------|-------|-------|--------|
| ARD** | -54.43 | 2    | 112.86 | 112.87 | 0.01  | 0.00  | 0.89  | 0.0069 |
| ARD   | -57.81 | 2    | 119.62 | 119.64 | 6.76  | 0.03  | 4e-04 | 0      |
| ER    | -58.55 | 1    | 119.1  | 119.11 | 6.23  | 0.04  | 4e-04 | 4e-04  |
| UNI01 | -58.5  | 1    | 119.01 | 119.01 | 6.14  | 0.04  | 4e-04 | 0      |
| UNI10 | -79.63 | 1    | 161.25 | 161.26 | 48.38 | 0     |       | 0.0181 |

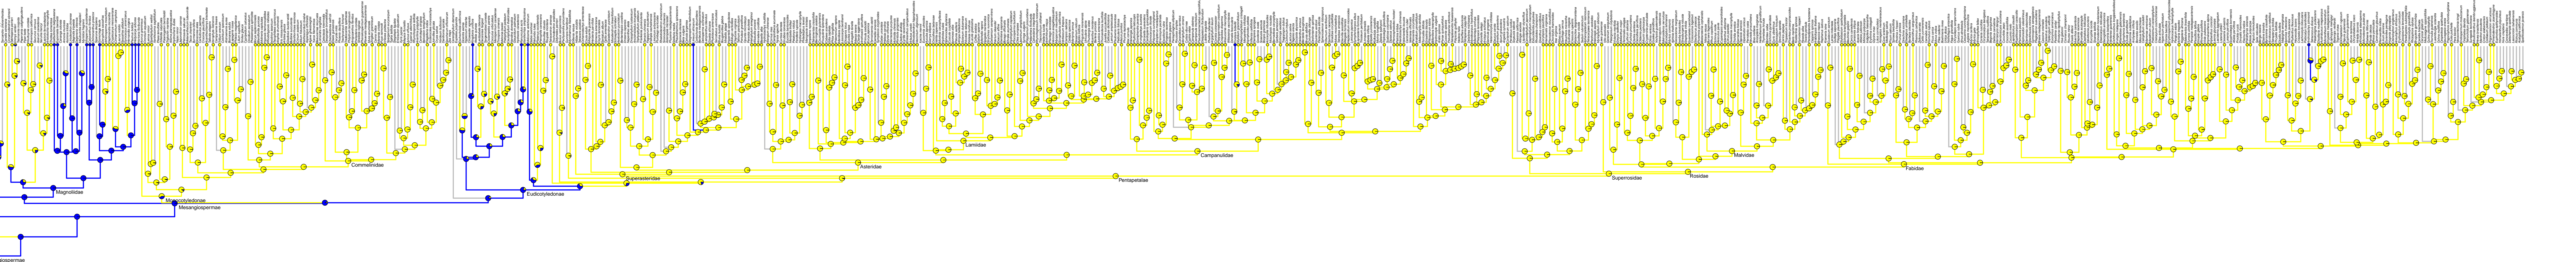



ML ancestral state reconstruction using rayDISC (R:corHMM)

331\_A. Number of androecium structural whorls (3-state) (D2c), ORDeq model

- one (1)
- two (2)
- more than two (>2)

| Model   | LogL    | Npar | AIC    | DeltaAIC | wtwot | q1   | q2     | q3     |
|---------|---------|------|--------|----------|-------|------|--------|--------|
| ARD     | -232.52 | 6    | 477.04 | 47.16    | 0.09  | 0.01 | 0.01   | 0.01   |
| ARDeq   | -231.47 | 6    | 474.94 | 45.06    | 0.27  | 0.01 | 0.01   | 0.01   |
| ER      | -279.55 | 1    | 561.56 | 84.52    | 0.00  | 0.01 | 0.01   | 0.01   |
| SYM     | -254.85 | 3    | 515.7  | 48.66    | 0.00  | 0.03 | 0.03   | 0.03   |
| SYMeq   | -254.19 | 3    | 514.37 | 47.37    | 0.00  | 0.03 | 0.03   | 0.03   |
| ORD     | -233.99 | 4    | 475.98 | 46.94    | 0.17  | 0.00 | 0.00   | 0.00   |
| ORDeq*  | -232.95 | 4    | 473.9  | 43.95    | 0     | 0.47 | 0      | 0      |
| ORDSYM  | -255.62 | 2    | 515.24 | 515.26   | 41.31 | 0    | 0.0034 | 0.0034 |
| ORDSYMq | -254.9  | 2    | 513.8  | 513.82   | 39.87 | 0    | 0.0034 | 0.0034 |
| ORDER   | -261.04 | 1    | 524.09 | 524.09   | 50.15 | 0    | 0.0027 | 0.0027 |

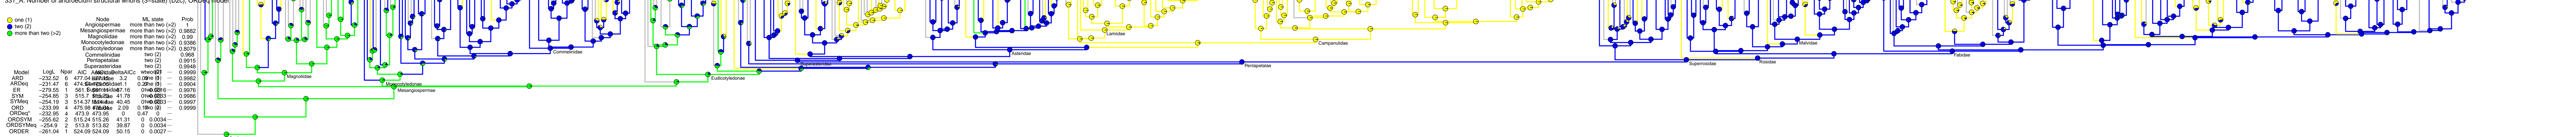

MP ancestral state reconstruction using ancestral.pars  
(R32\_A. Androecium structural merism (4-state) (D2c), 58 steps

- dimerous  
● trimerous  
● tetramerous  
● pentamerous

- Node  
Angiospermae  
Mesangiospermae  
Magnoliidae  
Monocotyledonae  
Eudicotyledonae  
Commelinidae  
Pentapetalae  
Superasteridae  
Asteridae  
Lamiidae  
Campanulidae  
Superrosidae  
Rosidae  
Malvaceae  
Fabidae

- MP state(s)  
trimerous  
trimerous  
trimerous  
trimerous  
trimerous / tetramerous / pentamerous  
trimerous  
trimerous  
pentamerous  
pentamerous  
pentamerous  
pentamerous  
pentamerous  
pentamerous  
pentamerous  
pentamerous

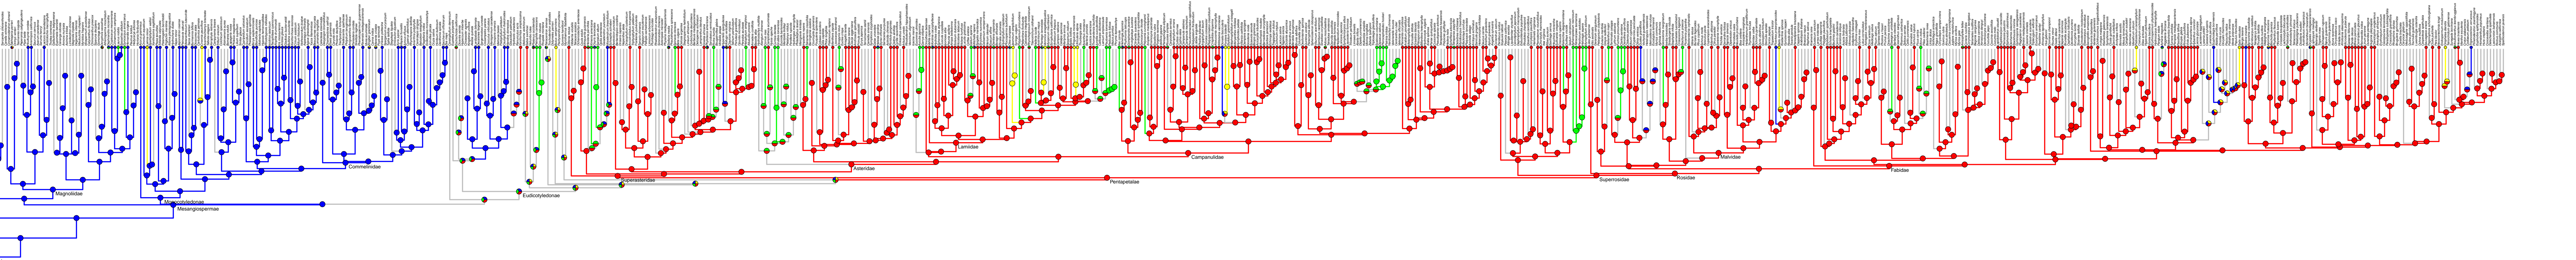

ML ancestral state reconstruction using rayDISC (R:corHMM)  
 332\_A. Androecium structural merism (4-state) (D2c), SYMeq model

● dimerous  
● trimerous  
● tetramerous  
● pentamerous

| Model    | LogL    | Npar | AIC    | DeltaAIC | Penalty | Posterior |
|----------|---------|------|--------|----------|---------|-----------|
| ARD      | -222.76 | 12   | 469.52 | 10.36    | 10.9993 | 1.0000    |
| ARDeq    | -221.86 | 12   | 467.24 | 8.55     | 10.9993 | 1.0000    |
| ER       | -237.93 | 1    | 477.50 | 18.83    | 10.9993 | 0.0000    |
| SYM      | -224.97 | 6    | 461.94 | 6.25     | 10.9993 | 1.0000    |
| SYMeq**  | -223.73 | 6    | 459.46 | 5.00     | 10.9993 | 1.0000    |
| ORD      | -236.95 | 6    | 485.39 | 485.00   | 10.9993 | 0.0000    |
| ORDeq    | -236.69 | 6    | 485.39 | 485.00   | 10.9993 | 0.0000    |
| ORDSYM   | -260.13 | 3    | 526.27 | 526.3    | 10.9993 | 0.0000    |
| ORDSYMeq | -259.23 | 3    | 524.47 | 524.5    | 10.9993 | 0.0000    |
| ORDER    | -261.09 | 1    | 524.18 | 524.18   | 10.9993 | 0.0000    |

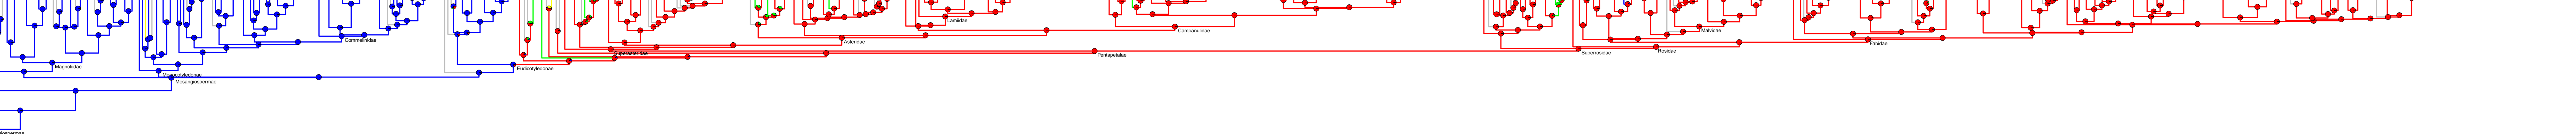

MP ancestral state reconstruction using ancestral.pars  
(R32\_B. Androeceium structural merism (3-state) (D2c), 49 steps

- trimerous
- tetramerous
- pentamerous

- Node
- Angiospermae
- Mesangiospermae
- Magnoliidae
- Monocotyledonae
- Commelinidae
- Eudicotyledonae
- Superasteridae
- Asteridae
- Lamiidae
- Campanulidae
- Superrosidae
- Rosidae
- Malvaceae
- Fabidae

- MP state(s)
- trimerous
- trimerous
- trimerous
- trimerous
- trimerous / tetramerous / pentamerous
- trimerous
- pentamerous

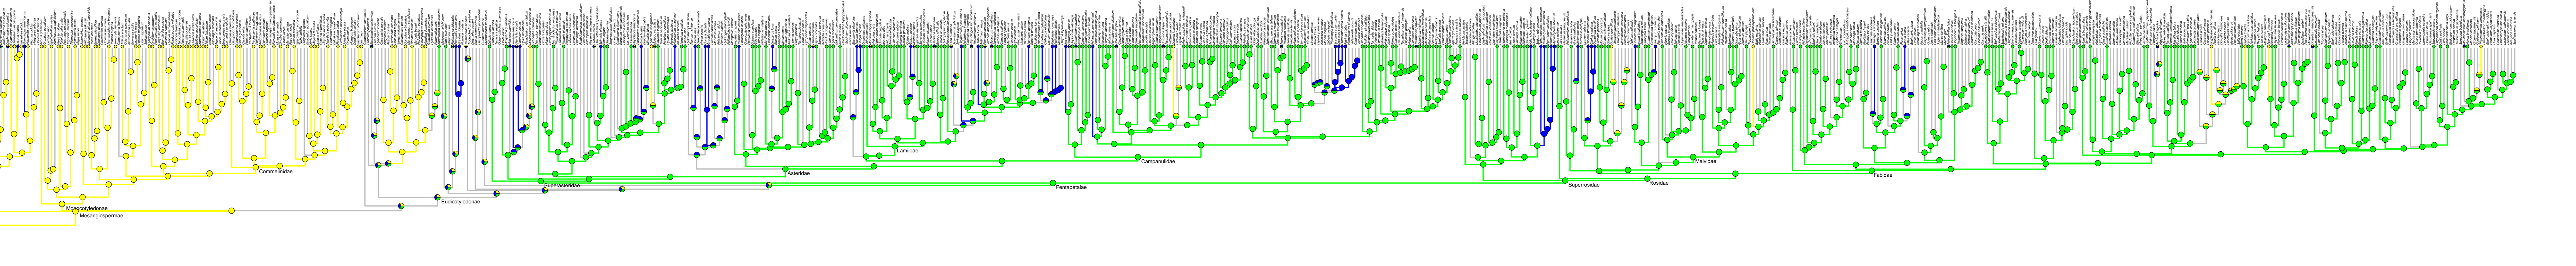

ML ancestral state reconstruction using rayDISC (R:corHMM)  
 332\_B. Androecium structural merism (3–state) (D2c), ARDeq model

● trimerous  
● tetramerous  
● pentamerous

| Node            | ML state    | Prob   |
|-----------------|-------------|--------|
| Angiospermae    | trimerous   | 0.9999 |
| Mesangiospermae | trimerous   | 1      |
| Magnoliidae     | trimerous   | 1      |
| Monocotyledonae | trimerous   | 1      |
| Eudicotyledonae | trimerous   | 0.8752 |
| Commelinidae    | trimerous   | 1      |
| Pentapetalae    | tetramerous | 0.9999 |
| Superasteridae  | tetramerous | 1      |

| Model    | LogL    | Npar | AIC    | DeltaAIC | Bayes | Posterior |
|----------|---------|------|--------|----------|-------|-----------|
| ARD      | -170.44 | 6    | 352.88 | 352.88   | 1.97  | 0.9919    |
| ARDeq**  | -169.46 | 6    | 350.06 | 2.82     | 0     | 0.9624    |
| ER       | -186.52 | 1    | 375.01 | 24.95    | 2.4   | 0.0611    |
| SYM      | -177    | 3    | 360.85 | 9.01     | 0.01  | 0.9994    |
| SYMeq    | -176    | 3    | 358.01 | 6.84     | 7.02  | 0.5774    |
| ORD      | -178.86 | 4    | 365.72 | 5.26     | 14.75 | 0.9474    |
| ORDeq    | -178.69 | 4    | 365.37 | 3.65     | 14.41 | 0.1e-04   |
| ORDSYM   | -186.31 | 2    | 376.62 | 376.64   | 25.62 | 0.0019    |
| ORDSYMeq | -185.41 | 2    | 374.83 | 374.84   | 23.82 | 0.0018    |
| ORDER    | -187.22 | 1    | 376.44 | 376.44   | 25.42 | 0.0026    |

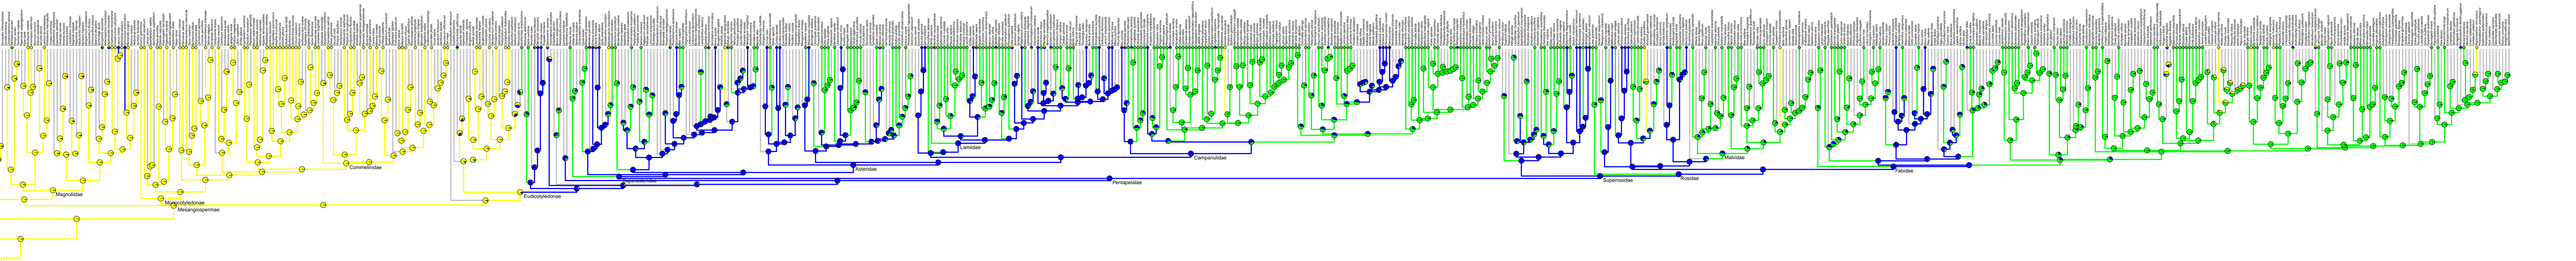

MP ancestral state reconstruction using ancestral.pars  
(R:phangorn)  
305\_A. Filament (binary) (D2d), 52 steps

- laminar (wide)  
● typical (narrow)
- | Node            | MP state(s)      |
|-----------------|------------------|
| Angiospermae    | laminar (wide)   |
| Mesangiospermae | laminar (wide)   |
| Magnoliidae     | laminar (wide)   |
| Monocotyledonae | typical (narrow) |
| Eudicotyledonae | typical (narrow) |
| Commelinidae    | typical (narrow) |
| Pentapetalae    | typical (narrow) |
| Superasteridae  | typical (narrow) |
| Asteridae       | typical (narrow) |
| Lamiidae        | typical (narrow) |
| Campanulidae    | typical (narrow) |
| Superrosidae    | typical (narrow) |
| Rosidae         | typical (narrow) |
| Malvaceae       | typical (narrow) |
| Fabidae         | typical (narrow) |

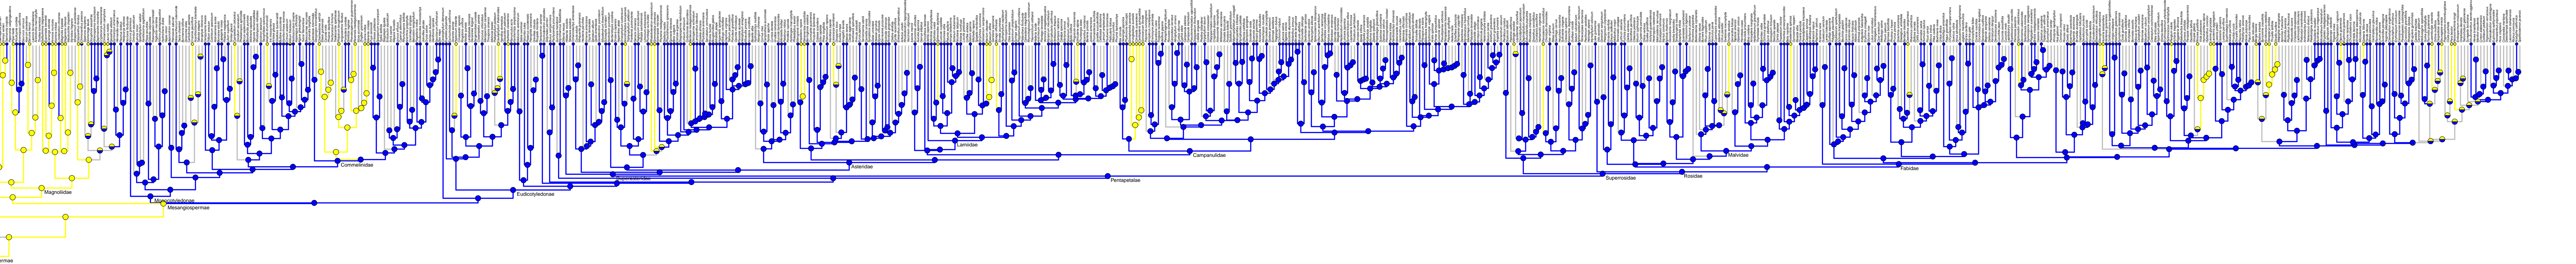

ML ancestral state reconstruction using rayDISC (R:corHMM)  
305\_A. Filament (binary) (D2d), ARdeq model

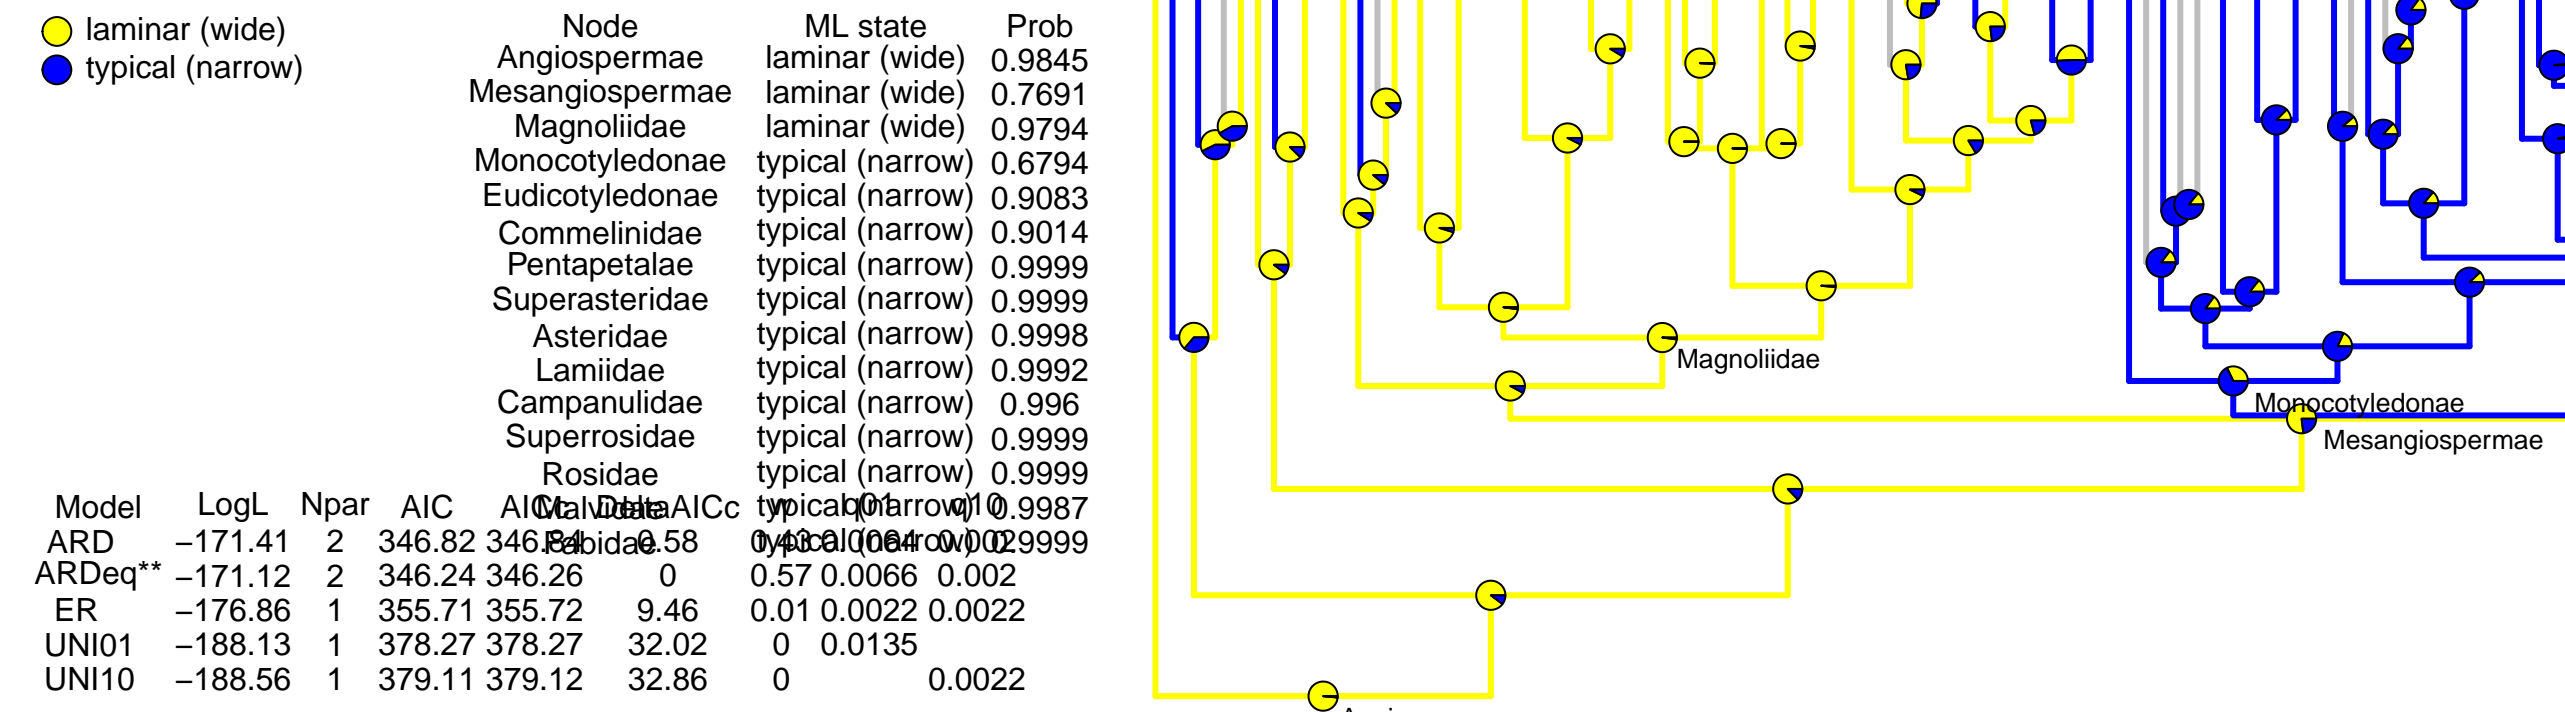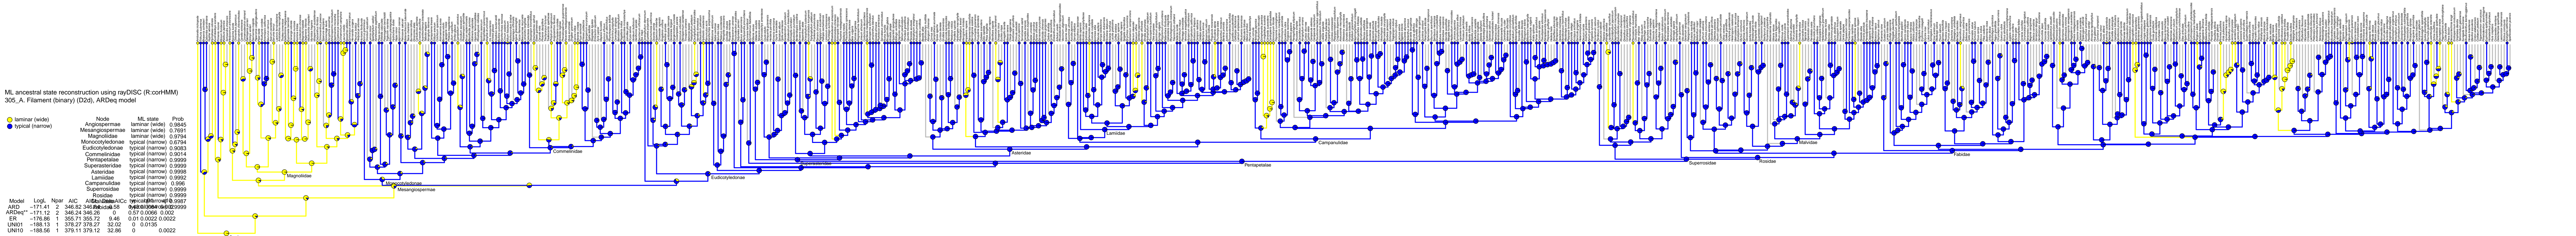

ancestral state reconstruction using ancestral.pars  
(phangorn)

\_A. Anther orientation (D2d), 110 steps

☐ Infratrose  
☐ Atrore  
☐ Extrorse

| Node            | MP state(s)         |
|-----------------|---------------------|
| Angiospermae    | introrse            |
| Angiospermae    | introrse / extrorse |
| Magnoliidae     | extrorse            |
| Monocotyledonae | introrse            |
| Eudicotyledonae | introrse / extrorse |
| Commelinidae    | introrse            |
| Pentapetalae    | introrse            |
| Superasteridae  | introrse            |
| Asteridae       | introrse            |
| Lamiidae        | introrse            |
| Campanulidae    | introrse            |
| Superrosidae    | introrse            |
| Rosidae         | introrse            |
| Malvidae        | introrse            |
| Fabidae         | introrse            |

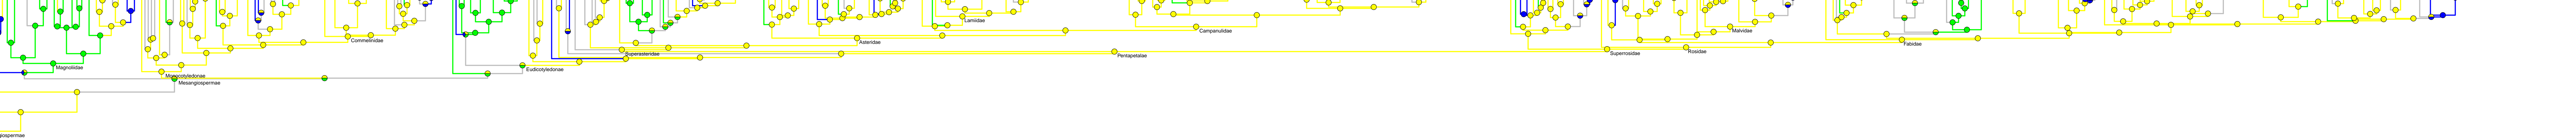

ML ancestral state reconstruction using rayDISC (R:corHMM)  
311\_A. Anther orientation (D2d), ER model

● introrse

● latrorse

● extrorse

Node

ML state

Prob

Angiospermae

introrse

0.8346

Mesangiospermae

introrse

0.9161

Magnoliidae

extrorse

0.9217

Monocotyledonae

introrse

0.9488

Eudicotyledonae

introrse

0.9321

Commelinidae

introrse

0.9939

Pentapetalae

introrse

1

Superasteridae

introrse

0.9998

Asteridae

introrse

0.9997

Lamiidae

introrse

0.9998

Campanulidae

introrse

1

Superrosidae

introrse

1

|       |         |      |        |                  |                  |                   |                    |
|-------|---------|------|--------|------------------|------------------|-------------------|--------------------|
| Model | LogL    | Npar | AIC    | AIC <sub>Δ</sub> | AIC <sub>C</sub> | W <sub>0.95</sub> | W <sub>0.999</sub> |
| ARD   | -344.54 | 6    | 701.08 | 701.19           | 1.61             | 0.14              | 0.9997             |
| ARDeq | -344.25 | 6    | 700.5  | 700.6            | 1.69             | 0.14              | 0.0036 ...         |
| ER*   | -348.5  | 1    | 698.99 | 699              | 0                | 0.32              | 0.0026 ...         |
| SYM   | -347.33 | 3    | 700.65 | 700.68           | 1.68             | 0.14              | 0.003 ...          |
| SYMq  | -346.55 | 3    | 699.11 | 699.14           | 0.14             | 0.3               | 0.0029 ...         |

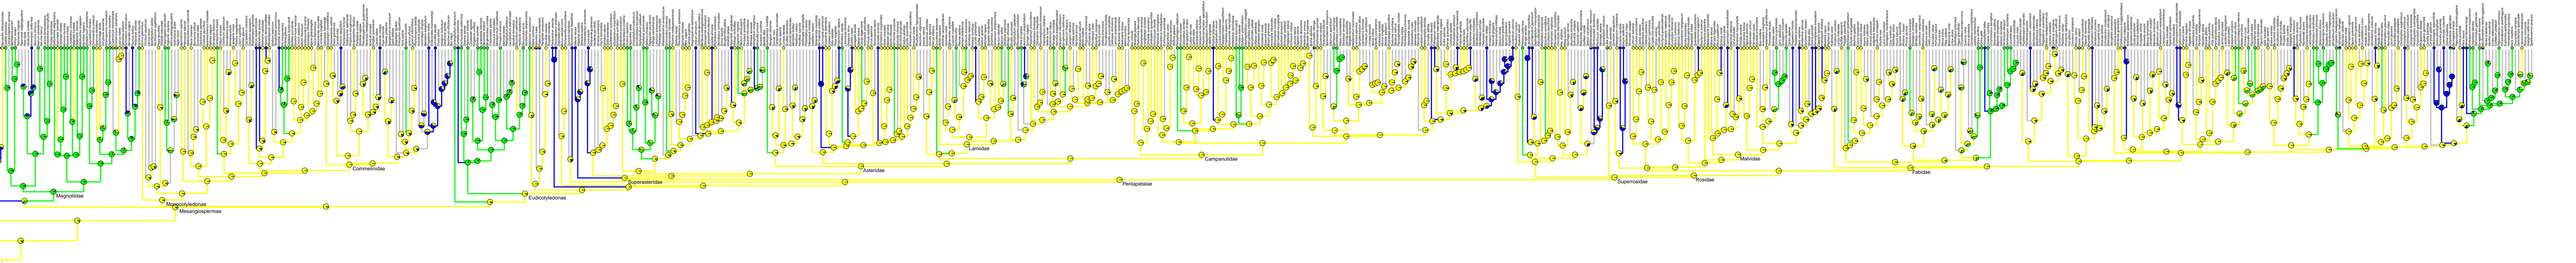



ML ancestral state reconstruction using rayDISC (R:corHMM)  
 312\_A. Anther attachment (binary) (D2d), ARDeq model

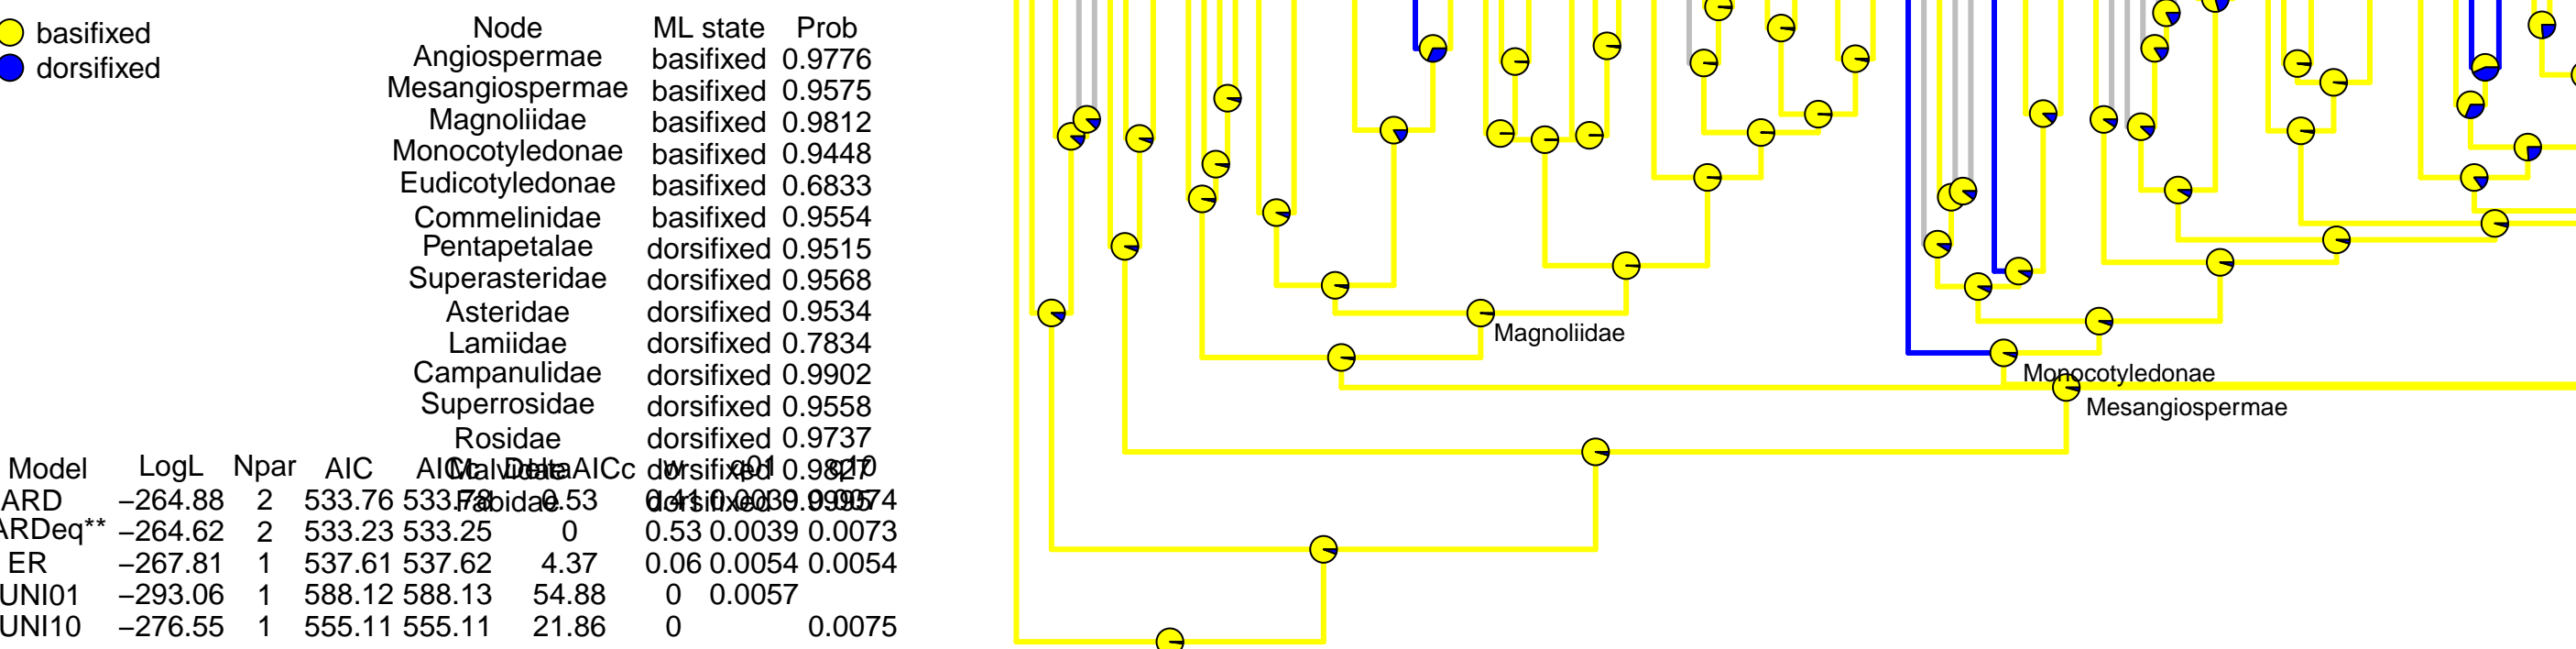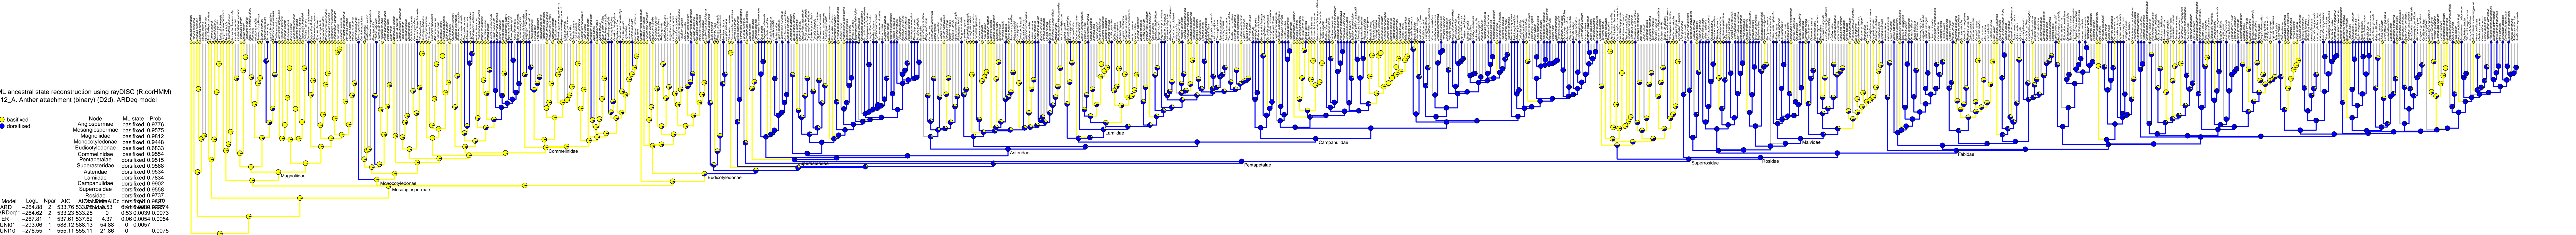



ML ancestral state reconstruction using rayDISC (R:corHMM)  
 313\_A. Anther dehiscence (3-state) (D2d), ARDeq model

● longitudinal slit

● H-valvate

● flap-valvate

| Node            | ML state          | Prob   |
|-----------------|-------------------|--------|
| Angiospermae    | longitudinal slit | 1      |
| Mesangiospermae | longitudinal slit | 0.9989 |
| Magnoliidae     | longitudinal slit | 0.9687 |
| Monocotyledonae | longitudinal slit | 1      |
| Eudicotyledonae | longitudinal slit | 1      |
| Commelinidae    | longitudinal slit | 1      |
| Pentapetalae    | longitudinal slit | 1      |
| Superasteridae  | longitudinal slit | 1      |
| Asteridae       | longitudinal slit | 1      |
| Lamiidae        | longitudinal slit | 1      |
| Campanulidae    | longitudinal slit | 1      |
| Superrosidae    | longitudinal slit | 1      |
| Rosidae         | longitudinal slit | 1      |
| Malvaceae       | longitudinal slit | 1      |
| Ericaceae       | longitudinal slit | 1      |

| Model  | LogL   | Npar | AIC    | AICCM  | AICCc | wong | 0.10  | 0.25  | 0.50 | 1.00 |
|--------|--------|------|--------|--------|-------|------|-------|-------|------|------|
| ARD    | -55.6  | 6    | 123.19 | 123.3  | 123.4 | 0    | 0.36  | 2e-04 | ...  | ...  |
| ARDeq* | -54.57 | 6    | 121.13 | 121.24 | 121.3 | 0    | 0.36  | 2e-04 | ...  | ...  |
| ER     | -60.2  | 1    | 122.39 | 122.4  | 1.16  | 0.2  | 1e-04 | ...   | ...  | ...  |
| SYM    | -59.16 | 3    | 122.32 | 124.35 | 3.11  | 0.08 | 2e-04 | ...   | ...  | ...  |
| SYMeq  | -58.06 | 3    | 122.13 | 122.16 | 0.92  | 0.23 | 2e-04 | ...   | ...  | ...  |

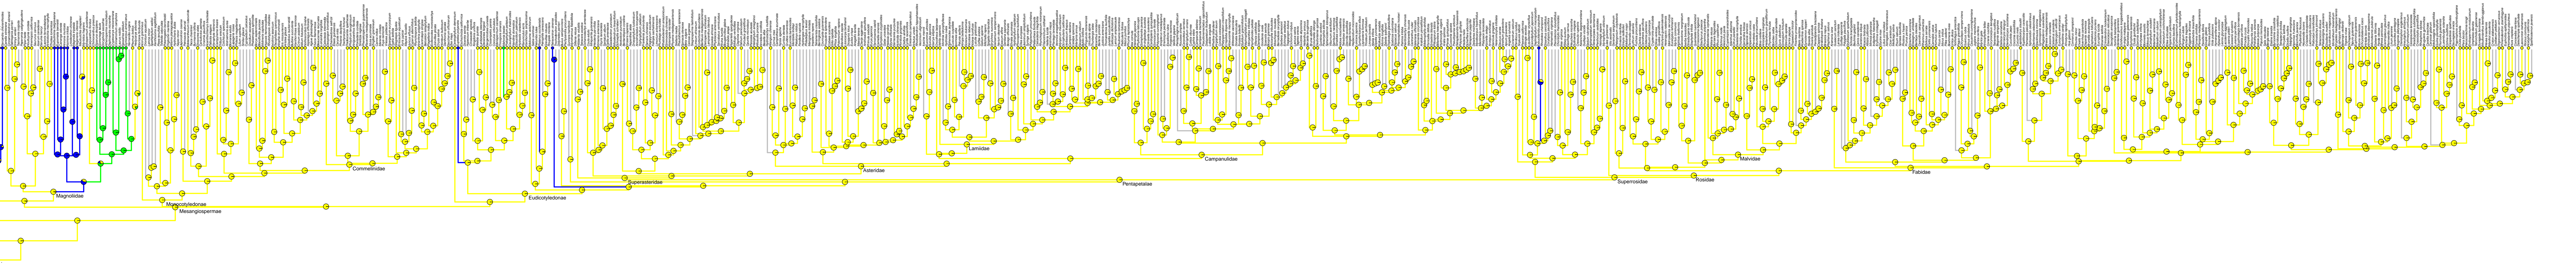



ML ancestral state reconstruction using rayDISC (R:corHMM)  
401\_B. Number of structural carpels (5-state) (D2c), ARDeq model

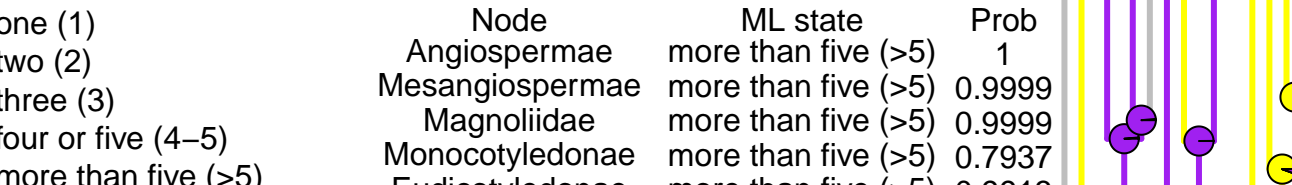

| Model   | LogL    | Npar | AIC     | Ast     | Delta  | AICc    | Delta  | AICc    | Delta  | OR     | ORDeq  | ORDSYM | ORDSYMeq | ORDER  |
|---------|---------|------|---------|---------|--------|---------|--------|---------|--------|--------|--------|--------|----------|--------|
| ARD     | -665.1  | 20   | 1370.21 | 1370.21 | 0      | 1370.21 | 0      | 1370.21 | 0      | 0.9831 | 0.9831 | 0.9831 | 0.9831   | 0.9831 |
| ARD*    | -663.53 | 20   | 1367.09 | 1367.09 | 3.13   | 1367.09 | 3.13   | 1367.09 | 3.13   | 0.9969 | 0.9969 | 0.9969 | 0.9969   | 0.9969 |
| ER      | -719.31 | 1    | 1440.51 | 1440.51 | 77.32  | 1440.51 | 77.32  | 1440.51 | 77.32  | 0.9995 | 0.9995 | 0.9995 | 0.9995   | 0.9995 |
| SYM     | -684.82 | 10   | 1389.65 | 1389.65 | 21.70  | 1389.65 | 21.70  | 1389.65 | 21.70  | 0.9994 | 0.9994 | 0.9994 | 0.9994   | 0.9994 |
| SYM*    | -683.52 | 10   | 1387.05 | 1387.05 | 19.70  | 1387.05 | 19.70  | 1387.05 | 19.70  | 0.9992 | 0.9992 | 0.9992 | 0.9992   | 0.9992 |
| ORD     | -757    | 8    | 1530.01 | 1530.01 | 162.14 | 1530.01 | 162.14 | 1530.01 | 162.14 | 0.9999 | 0.9999 | 0.9999 | 0.9999   | 0.9999 |
| ORD*    | -756.05 | 8    | 1528.11 | 1528.29 | 160.18 | 1528.11 | 160.18 | 1528.11 | 160.18 | 0.9999 | 0.9999 | 0.9999 | 0.9999   | 0.9999 |
| ORDSYM  | -762.95 | 4    | 1533.89 | 1533.94 | 165.79 | 1533.89 | 165.79 | 1533.89 | 165.79 | 0.0038 | 0.0038 | 0.0038 | 0.0038   | 0.0038 |
| ORDSYM* | -762.22 | 4    | 1532.44 | 1532.5  | 164.34 | 1532.44 | 164.34 | 1532.44 | 164.34 | 0.0038 | 0.0038 | 0.0038 | 0.0038   | 0.0038 |
| ORDER   | -768.94 | 1    | 1539.87 | 1539.88 | 171.73 | 1539.87 | 171.73 | 1539.87 | 171.73 | 0.0055 | 0.0055 | 0.0055 | 0.0055   | 0.0055 |

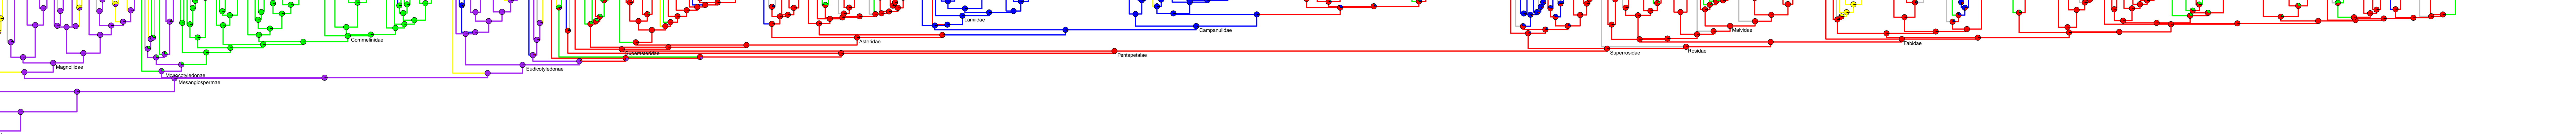

MP ancestral state reconstruction using ancestral.pars  
(R:phangorn)  
400\_A. Gynoecium phyllotaxy (D2d), 10 steps

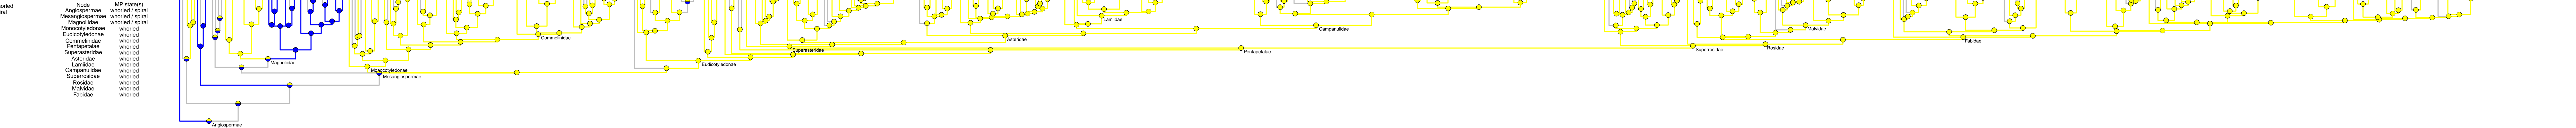

ML ancestral state reconstruction using rayDISC (R:corHMM)  
400\_A. Gynoecium phyllotaxy (D2d), ARDeq model

● whorled  
● spiral

| Node            | ML state | Prob   |
|-----------------|----------|--------|
| Angiospermae    | spiral   | 1      |
| Mesangiospermae | spiral   | 0.999  |
| Magnoliidae     | spiral   | 0.9997 |
| Monocotyledonae | whorled  | 0.5215 |
| Eudicotyledonae | spiral   | 0.9984 |
| Commelinidae    | whorled  | 1      |
| Pentapetalae    | whorled  | 0.9638 |
| Superasteridae  | whorled  | 0.984  |
| Asteridae       | whorled  | 1      |
| Lamiidae        | whorled  | 1      |
| Campanulidae    | whorled  | 1      |
| Superrosidae    | whorled  | 0.9668 |
| Rosidae         | whorled  | 0.967  |
| Malvaceae       | whorled  | 0.91   |
| Malvaceae       | whorled  | 0.9998 |
| ARD             | whorled  | 0.0068 |
| ARD**           | whorled  | 0.0068 |
| ER              | whorled  | 4e-04  |
| UNI01           | whorled  | 4e-04  |
| UNI10           | whorled  | 0.0079 |

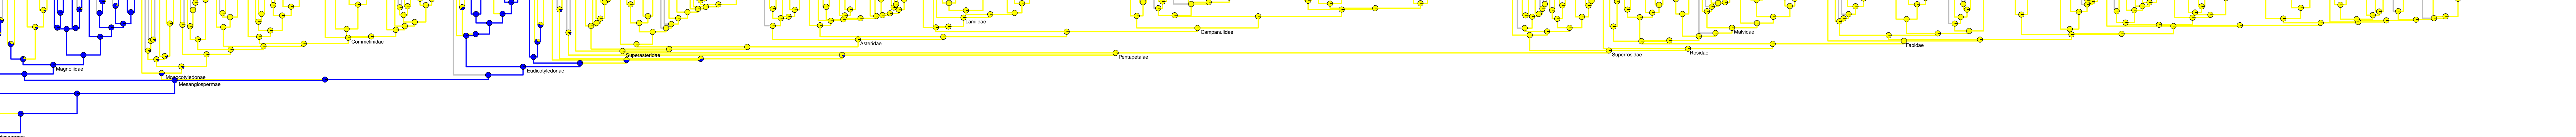



ML ancestral state reconstruction using rayDISC (R:corHMM)  
403\_A. Fusion of ovaries (binary) (D2c), ARDeq model

● free (<5%)  
● fused (>5%)

| Node            | ML state    | Prob   |
|-----------------|-------------|--------|
| Angiospermae    | free (<5%)  | 1      |
| Mesangiospermae | free (<5%)  | 0.9998 |
| Magnoliidae     | free (<5%)  | 0.9993 |
| Monocotyledonae | free (<5%)  | 0.9088 |
| Eudicotyledonae | free (<5%)  | 0.9971 |
| Commelinidae    | fused (>5%) | 1      |
| Pentapetalae    | fused (>5%) | 0.9955 |
| Superasteridae  | fused (>5%) | 0.9957 |
| Asteridae       | fused (>5%) | 1      |
| Lamiidae        | fused (>5%) | 1      |
| Campanulidae    | fused (>5%) | 1      |
| Superrosidae    | fused (>5%) | 0.9994 |
| Rosidae         | fused (>5%) | 0.9997 |

| Model   | LogL    | Npar | AIC    | AICc   | AICw   | AICd   | AICf   | AICg   | AICh   | AICI   | AICj   | AIk    | AICl   | AICm   | AICn   | AICo   | AICp   | AICq   | AICr   | AICs   | AICt   | AICu   | AICv   | AICw   | AICx   | AICy   | AICz   |
|---------|---------|------|--------|--------|--------|--------|--------|--------|--------|--------|--------|--------|--------|--------|--------|--------|--------|--------|--------|--------|--------|--------|--------|--------|--------|--------|--------|
| ARD     | -95.14  | 2    | 194.29 | 194.29 | 194.29 | 194.29 | 194.29 | 194.29 | 194.29 | 194.29 | 194.29 | 194.29 | 194.29 | 194.29 | 194.29 | 194.29 | 194.29 | 194.29 | 194.29 | 194.29 | 194.29 | 194.29 | 194.29 | 194.29 | 194.29 | 194.29 | 194.29 |
| ARDeq** | -94.45  | 2    | 192.91 | 192.91 | 192.91 | 192.91 | 192.91 | 192.91 | 192.91 | 192.91 | 192.91 | 192.91 | 192.91 | 192.91 | 192.91 | 192.91 | 192.91 | 192.91 | 192.91 | 192.91 | 192.91 | 192.91 | 192.91 | 192.91 | 192.91 | 192.91 | 192.91 |
| ER      | -102    | 1    | 206    | 206.01 | 206.01 | 206.01 | 206.01 | 206.01 | 206.01 | 206.01 | 206.01 | 206.01 | 206.01 | 206.01 | 206.01 | 206.01 | 206.01 | 206.01 | 206.01 | 206.01 | 206.01 | 206.01 | 206.01 | 206.01 | 206.01 | 206.01 | 206.01 |
| UNI01   | -102.29 | 1    | 206.58 | 206.59 | 206.59 | 206.59 | 206.59 | 206.59 | 206.59 | 206.59 | 206.59 | 206.59 | 206.59 | 206.59 | 206.59 | 206.59 | 206.59 | 206.59 | 206.59 | 206.59 | 206.59 | 206.59 | 206.59 | 206.59 | 206.59 | 206.59 | 206.59 |
| UNI10   | -107.41 | 1    | 216.81 | 216.82 | 216.82 | 216.82 | 216.82 | 216.82 | 216.82 | 216.82 | 216.82 | 216.82 | 216.82 | 216.82 | 216.82 | 216.82 | 216.82 | 216.82 | 216.82 | 216.82 | 216.82 | 216.82 | 216.82 | 216.82 | 216.82 | 216.82 | 216.82 |

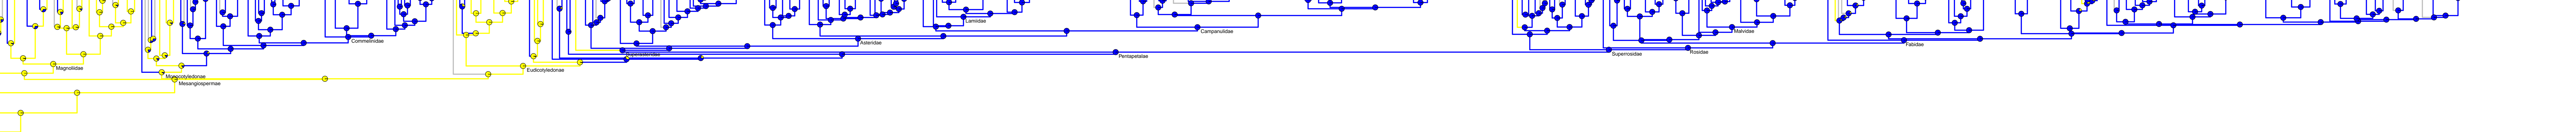

MP ancestral state reconstruction using ancestral.pars  
(R: phorn)

411\_A. Number of ovules per functional carpel (3-state) (D2c), 121 steps

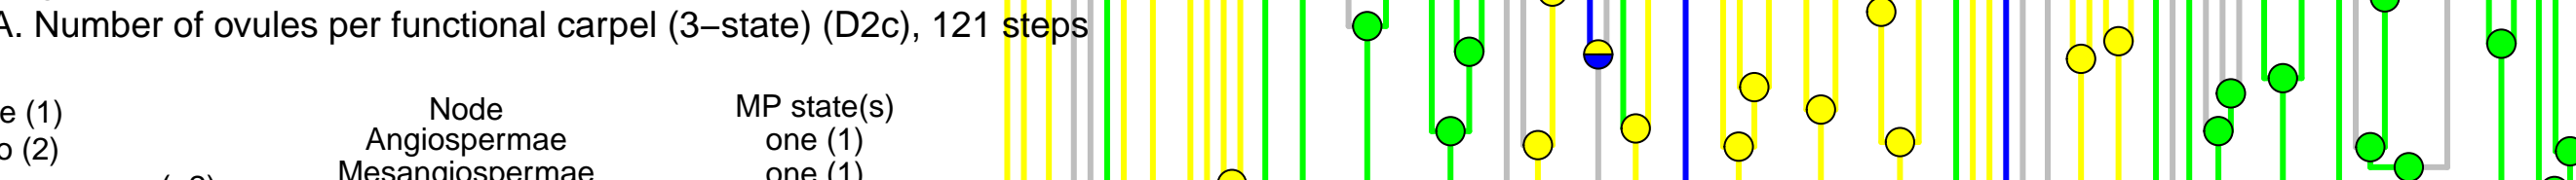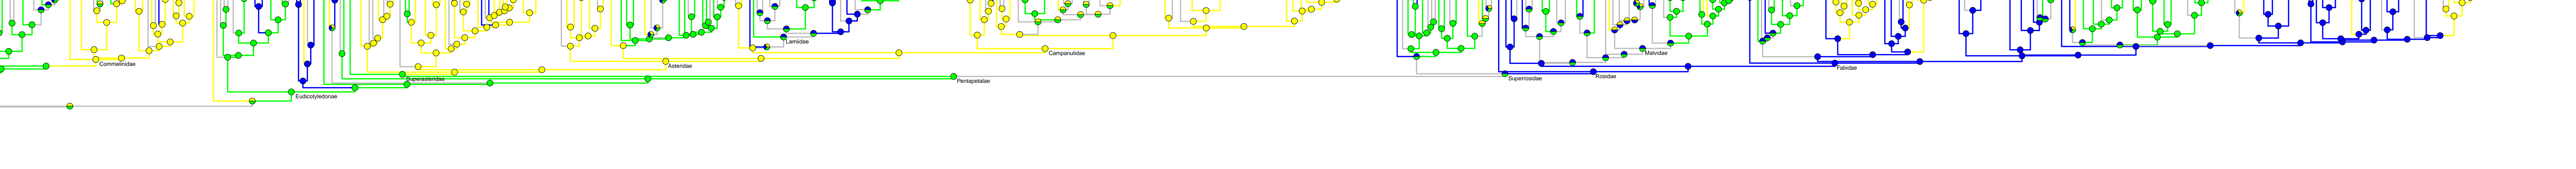

ML ancestral state reconstruction using rayDISC (R:corHMM)  
 411\_A. Number of ovules per functional carpel (3-state) (D2c), ARDeq mode

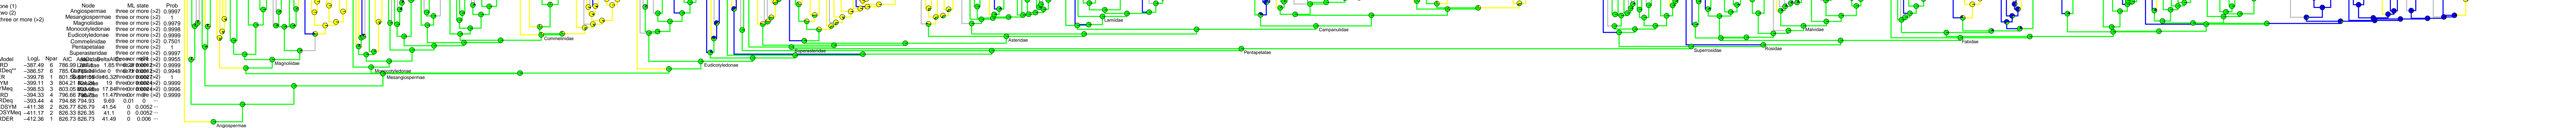

Supplement: Supplementary Data 19 [file ncomms16047-s20.pdf]
