# Supplementary material for: The ancestral flower of angiosperms and its early diversification
Source: Nat Commun. 2017 Aug 1;8:16047. doi: 10.1038/ncomms16047 (PMC5543309; doi:10.1038/ncomms16047)

MP ancestral state reconstruction using ancestral.pars  
(R:phangorn)  
100\_A. Functional sex of flowers (D2d), 98 steps

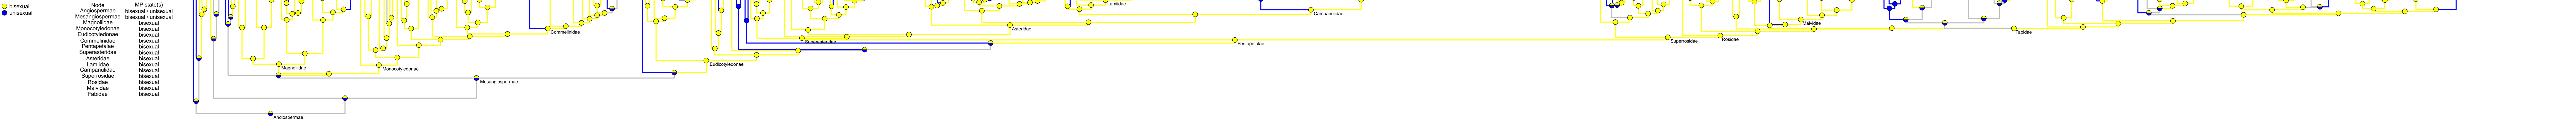

ML ancestral state reconstruction using rayDISC (R:corHMM)

100\_A. Functional sex of flowers (D2d), ARdeq model

● bisexual  
● unisexual

| Node            | ML state | Prob   |
|-----------------|----------|--------|
| Angiospermae    | bisexual | 1      |
| Mesangiospermae | bisexual | 1      |
| Magnoliidae     | bisexual | 1      |
| Monocotyledonae | bisexual | 0.9999 |
| Eudicotyledonae | bisexual | 1      |
| Commelinidae    | bisexual | 0.9996 |
| Pentapetalae    | bisexual | 1      |
| Superasteridae  | bisexual | 1      |
| Asteridae       | bisexual | 1      |
| Lamiidae        | bisexual | 1      |
| Campanulidae    | bisexual | 0.9978 |
| Superrosidae    | bisexual | 1      |
| Malvidae        | bisexual | 1      |
| Fabidae         | bisexual | 1      |
| Rosidae         | bisexual | 1      |
| Superosidae     | bisexual | 1      |
| Pentapetalae    | bisexual | 1      |
| Eudicotyledonae | bisexual | 1      |
| Commelinidae    | bisexual | 1      |
| Monocotyledonae | bisexual | 1      |
| Magnoliidae     | bisexual | 1      |
| Mesangiospermae | bisexual | 1      |
| Angiospermae    | bisexual | 1      |

| Model | LogL    | Npar | AIC    | AICc   | RobAICc | RobAICc | RobAICc | RobAICc | RobAICc |
|-------|---------|------|--------|--------|---------|---------|---------|---------|---------|
| ARD   | -313.91 | 2    | 631.81 | 631.81 | 631.81  | 631.81  | 631.81  | 631.81  | 631.81  |
| ARD*  | -313.24 | 2    | 630.48 | 630.48 | 630.48  | 630.48  | 630.48  | 630.48  | 630.48  |
| ER    | -315.34 | 1    | 632.69 | 632.69 | 632.69  | 632.69  | 632.69  | 632.69  | 632.69  |
| UNI01 | -315.41 | 1    | 632.82 | 632.82 | 632.82  | 632.82  | 632.82  | 632.82  | 632.82  |
| UNI10 | -364.24 | 1    | 730.49 | 730.49 | 730.49  | 730.49  | 730.49  | 730.49  | 730.49  |

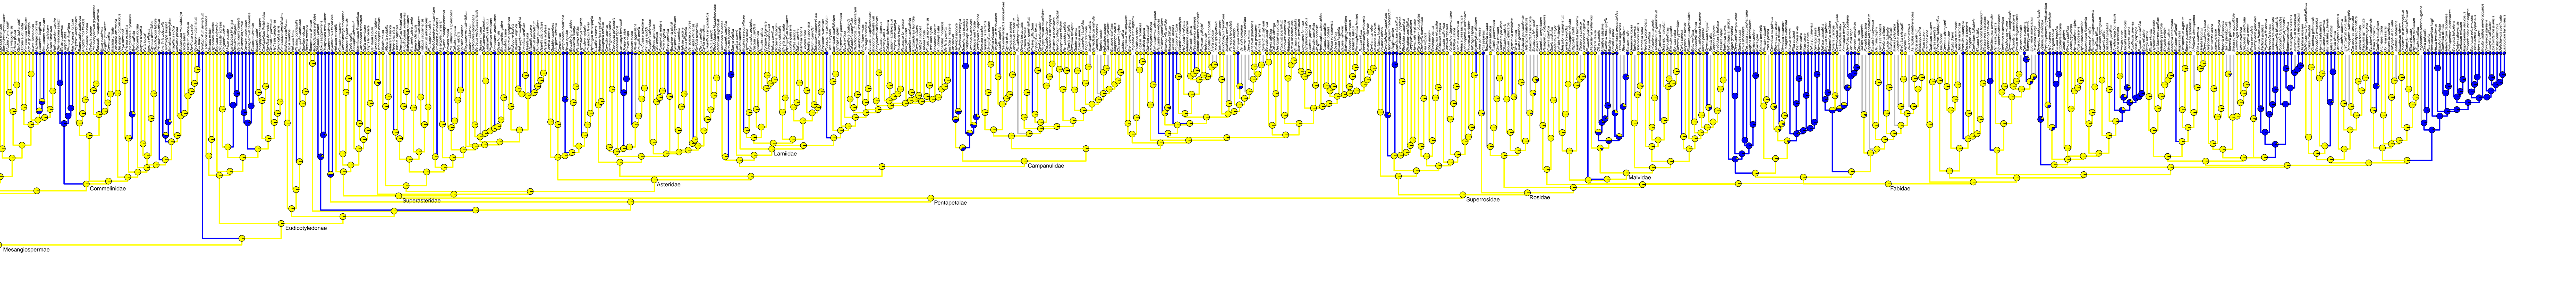

MP ancestral state reconstruction using ancestral.pars  
(R:phangorn)  
100\_B. Structural sex of flowers (D2d), 57 steps

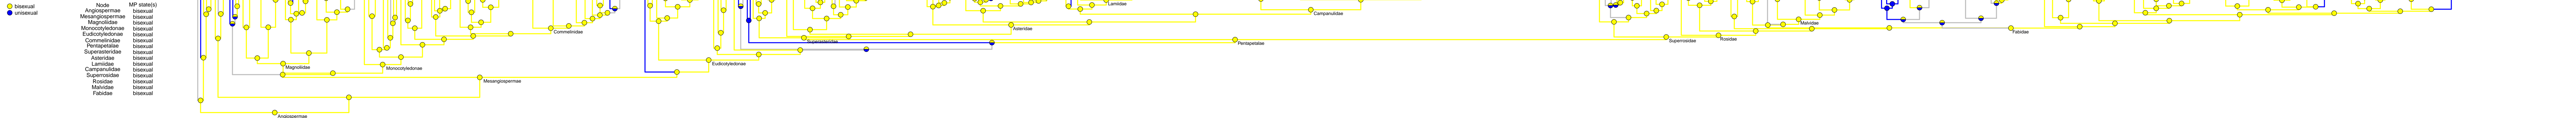

ML ancestral state reconstruction using rayDISC (R:corHMM)  
100\_B. Structural sex of flowers (D2d), ARDeq model

● bisexual  
● unisexual

| Node            | ML state | Prob   |
|-----------------|----------|--------|
| Angiospermae    | bisexual | 0.9949 |
| Mesangiospermae | bisexual | 0.9974 |
| Magnoliidae     | bisexual | 0.9995 |
| Monocotyledonae | bisexual | 0.9993 |
| Eudicotyledonae | bisexual | 0.999  |
| Commelinidae    | bisexual | 0.9999 |
| Pentapetalae    | bisexual | 0.9999 |
| Superasteridae  | bisexual | 1      |
| Asteridae       | bisexual | 1      |
| Lamiidae        | bisexual | 0.9999 |
| Campanulidae    | bisexual | 1      |
| Superrosidae    | bisexual | 1      |

| Model | LogL    | Npar | AIC    | AICc   | AICw   | AICB   | ΔAIC  | ΔAICc | ΔAICw | ΔAICB | BF     |
|-------|---------|------|--------|--------|--------|--------|-------|-------|-------|-------|--------|
| ARD   | -207.3  | 2    | 418.6  | 418.6  | 418.6  | 418.6  | 0     | 0     | 0     | 0     | 1      |
| ARD** | -206.91 | 2    | 417.81 | 417.81 | 417.81 | 417.81 | 0.79  | 0.79  | 0.79  | 0.79  | 0.0042 |
| ER    | -210.1  | 1    | 422.2  | 422.21 | 422.21 | 422.21 | 4.38  | 4.38  | 4.38  | 4.38  | 0.0015 |
| UNI01 | -229.29 | 1    | 460.59 | 460.59 | 460.59 | 460.59 | 42.76 | 42.76 | 42.76 | 42.76 | 0.0016 |
| UNI10 | -238.01 | 1    | 478.02 | 478.02 | 478.02 | 478.02 | 60.19 | 60.19 | 60.19 | 60.19 | 0.0149 |

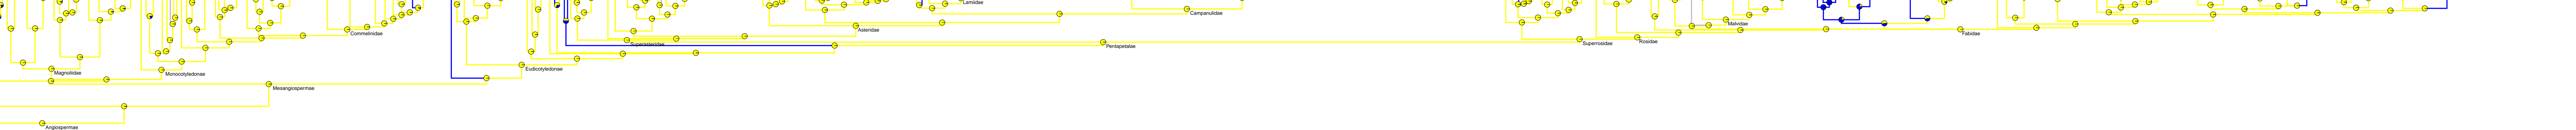

MP ancestral state reconstruction using ancestral.pars  
(R:phangorn)  
102\_B. Ovary position (binary) (D2d), 79 steps

superior

inferior

Node

Angiospermae

Mesangiospermae

Magnoliidae

Monocotyledonae

Eudicotyledonae

Commelinidae

Pentapetalae

Superasteridae

Asteridae

Lamiidae

Campanulidae

Superosidae

Rosidae

Malvidae

Fabidae

MP state(s)

superior

superior / inferior

superior / inferior

superior

superior

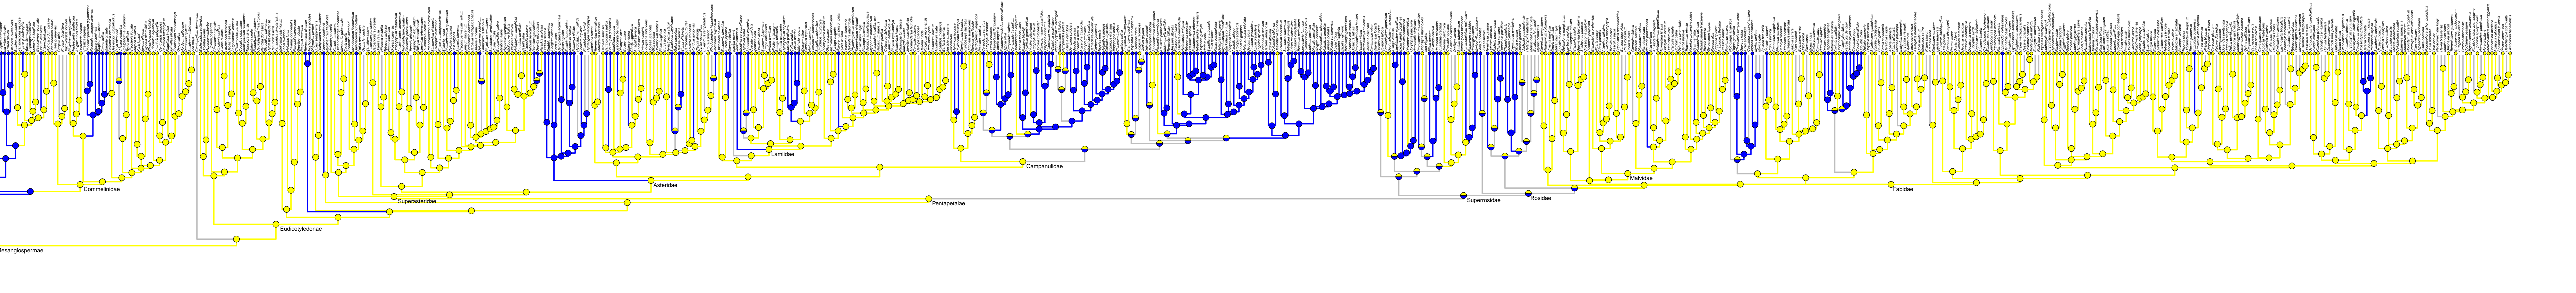

ML ancestral state reconstruction using rayDISC (R:corHMM)  
102\_B. Ovary position (binary) (D2d), ARDeq model

● superior  
● inferior

| Node            | ML state | Prob   |
|-----------------|----------|--------|
| Angiospermae    | superior | 1      |
| Mesangiospermae | superior | 0.9981 |
| Magnoliidae     | superior | 0.9939 |
| Monocotyledonae | superior | 0.9811 |
| Eudicotyledonae | superior | 0.9995 |
| Commelinidae    | superior | 0.6458 |
| Pentapetalae    | superior | 0.9926 |
| Superasteridae  | superior | 0.9968 |
| Asteridae       | superior | 0.9166 |
| Lamiidae        | superior | 0.9286 |
| Campanulidae    | superior | 0.6699 |
| Superosidae     | superior | 0.9225 |

| Model   | LogL    | Npar | AIC    | AICc   | AICw   | ΔAIC  | ΔAICc | ΔAICw | Posterior |
|---------|---------|------|--------|--------|--------|-------|-------|-------|-----------|
| ARD     | -270.17 | 2    | 544.35 | 544.49 | 544.25 | 0.00  | 0.00  | 0.00  | 0.0038    |
| ARDeq** | -269.55 | 2    | 543.09 | 543.33 | 543.09 | -1.26 | -0.40 | -1.26 | 0.99937   |
| ER      | -272.53 | 1    | 547.07 | 547.07 | 547.07 | 3.96  | 0.00  | 0.00  | 0.0022    |
| UNI01   | -287.14 | 1    | 576.28 | 576.28 | 576.28 | 33.17 | 0.00  | 0.00  | 0.0026    |
| UNI10   | -296.3  | 1    | 594.61 | 594.62 | 594.62 | 51.51 | 0.00  | 0.00  | 0.0092    |

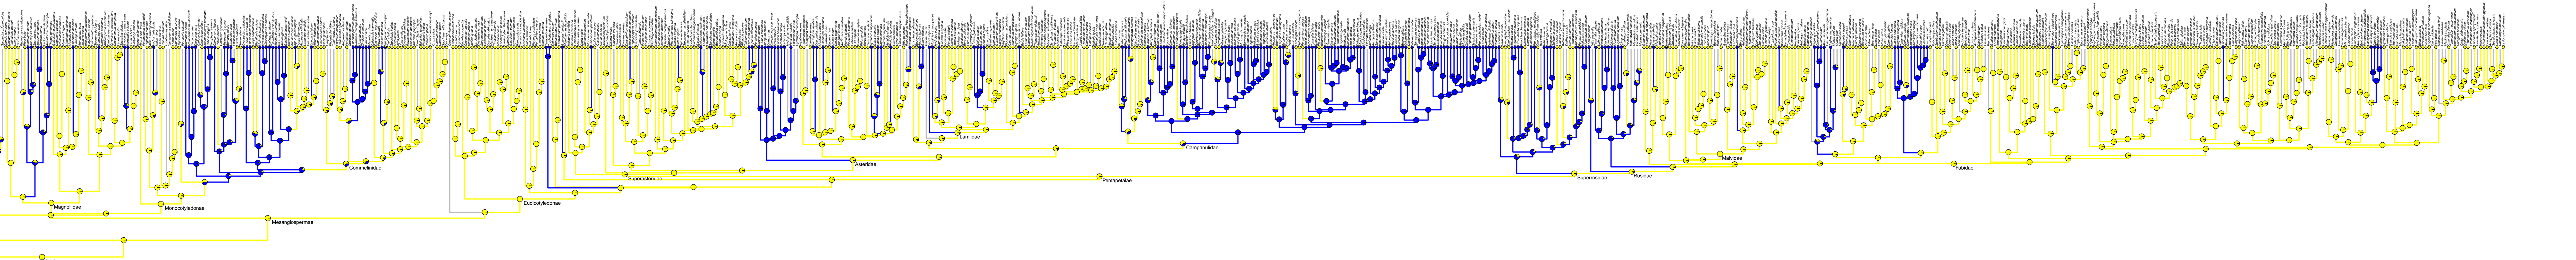

MP ancestral state reconstruction using ancestral.pars  
(R:phangorn)  
01\_A. Perianth presence (D2c), 21 steps

 absent  
 present

| Node        | MP state(s) |
|-------------|-------------|
| iospermae   | present     |
| ngiospermae | present     |
| gnoliidae   | present     |
| cotyledonae | present     |
| cotyledonae | present     |
| nmelinidae  | present     |
| tapetalae   | present     |
| erasteridae | present     |
| steridae    | present     |
| amiidae     | present     |
| panulidae   | present     |
| errosidae   | present     |
| Rosidae     | present     |
| Malvidae    | present     |
| Fabidae     | present     |

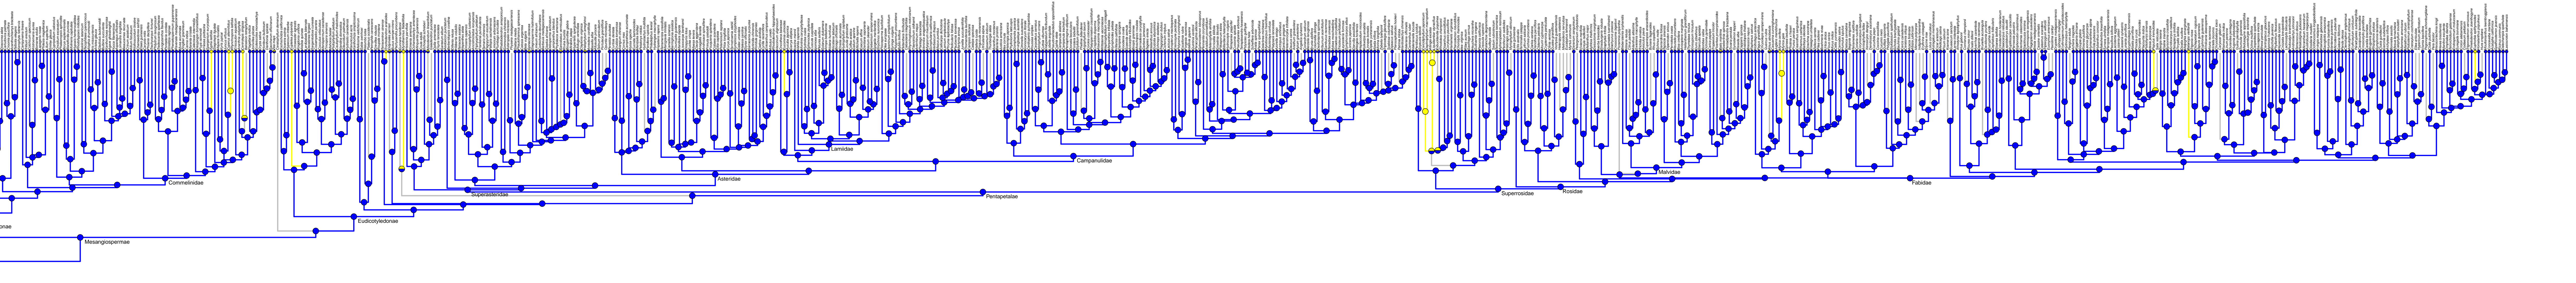

ML ancestral state reconstruction using rayDISC (R:corHMM)  
201\_A. Perianth presence (D2c), UNI10 model

● absent  
● present

| Node            | ML state | Prob |
|-----------------|----------|------|
| Angiospermae    | present  | 1    |
| Mesangiospermae | present  | 1    |
| Magnoliidae     | present  | 1    |
| Monocotyledonae | present  | 1    |
| Eudicotyledonae | present  | 1    |
| Commelinidae    | present  | 1    |
| Pentapetalae    | present  | 1    |
| Superasteridae  | present  | 1    |
| Asteridae       | present  | 1    |
| Lamiidae        | present  | 1    |
| Campanulidae    | present  | 1    |
| Superrosidae    | present  | 1    |

| Model  | LogL    | Npar | AIC    | AICc   | AICw   | ΔAIC  | Weight |
|--------|---------|------|--------|--------|--------|-------|--------|
| ARD    | -95.7   | 2    | 195.39 | 195.40 | 195.41 | 0.01  | 0.9999 |
| ARDq   | -95     | 2    | 194    | 194.01 | 194.02 | 0.01  | 0.9999 |
| ER     | -95.83  | 1    | 193.66 | 193.67 | 193.68 | 0.27  | 0.0001 |
| UNI01  | -117.13 | 1    | 236.26 | 236.27 | 236.28 | 42.87 | 0.0000 |
| UNI10* | -95.7   | 1    | 193.39 | 193.4  | 193.41 | 0     | 0.34   |

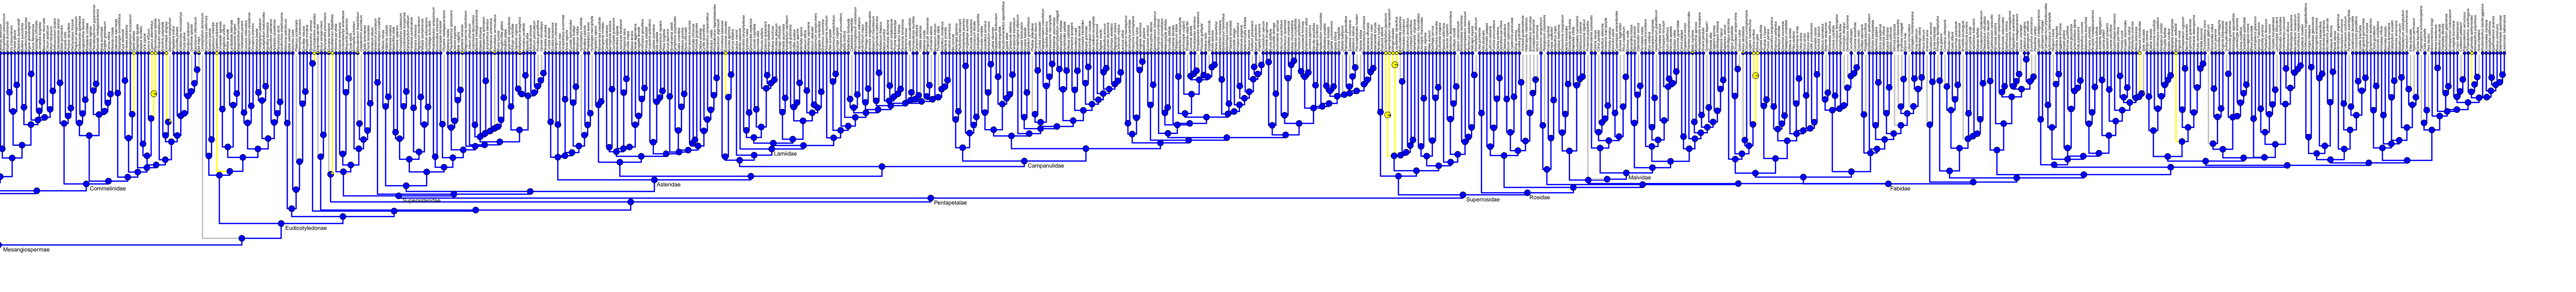

MP ancestral state reconstruction using ancestral.pars  
(R:phangorn)  
201\_B. Number of perianth parts (3–state) (D2c), 86 steps

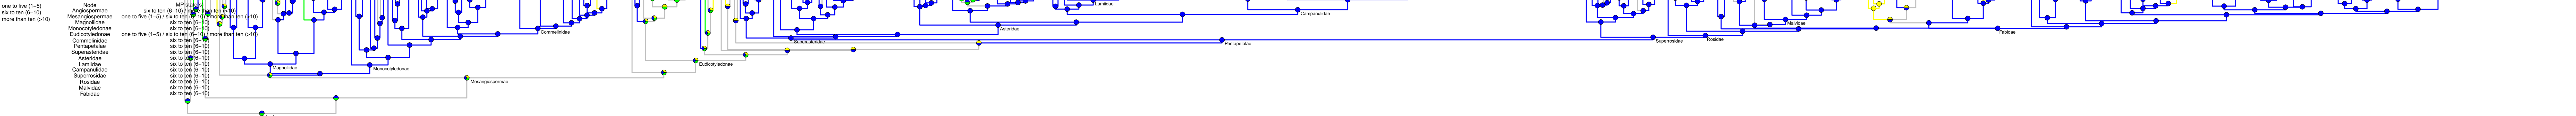

ML ancestral state reconstruction using rayDISC (R:corHMM)  
201\_B. Number of perianth parts (3–state) (D2c), ARDeq model

● one to five (1–5)  
● six to ten (6–10)  
● more than ten (>10)

|          | Node            | ML state            | Prob   |
|----------|-----------------|---------------------|--------|
|          | Angiospermae    | more than ten (>10) | 1      |
|          | Mesangiospermae | more than ten (>10) | 0.9985 |
|          | Magnoliidae     | more than ten (>10) | 0.9977 |
|          | Monocotyledonae | six to ten (6–10)   | 0.5596 |
|          | Eudicotyledonae | more than ten (>10) | 0.9825 |
|          | Commelinidae    | six to ten (6–10)   | 0.9999 |
|          | Pentapetalae    | six to ten (6–10)   | 0.9949 |
| Model    | LogL            | Npar                | AICc   |
| ARD      | –326.29         | 6                   | 664.57 |
| ARD**    | –325.2          | 6                   | 662.4  |
| ER       | –351.28         | 1                   | 704.5  |
| SYM      | –340.38         | 3                   | 686.7  |
| SYMeq    | –339.55         | 3                   | 685.09 |
| ORD      | –331.52         | 4                   | 671.05 |
| ORDeq    | –330.43         | 4                   | 668.87 |
| ORDSYM   | –343.51         | 2                   | 691.02 |
| ORDSYMeq | –342.81         | 2                   | 689.61 |
| ORDER    | –352.85         | 1                   | 707.7  |

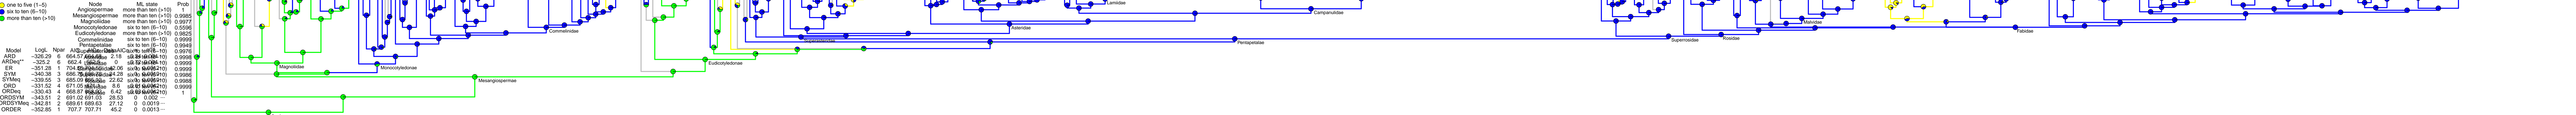



ML ancestral state reconstruction using rayDISC (R:corHMM)  
201\_C. Number of perianth parts (binary) (D2c), ARDeq model

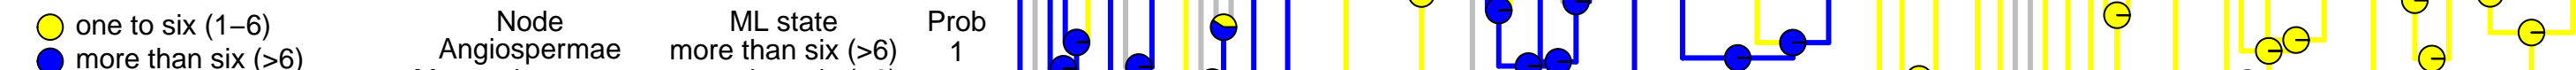

| Model   | LogL    | Npar | AIC    | AICc   | ML state           | Prob   |
|---------|---------|------|--------|--------|--------------------|--------|
| ARD     | -247.5  | 2    | 499    | 499.38 | more than six (>6) | 1      |
| ARDeq** | -246.81 | 2    | 497.61 | 497.61 | more than six (>6) | 0.9992 |
| ER      | -252.73 | 1    | 507.45 | 507.46 | more than six (>6) | 0.9986 |
| UNI01   | -330.51 | 1    | 663.03 | 663.03 | one to six (1-6)   | 0.7597 |
| UNI10   | -253.47 | 1    | 508.94 | 508.94 | more than six (>6) | 0.9996 |

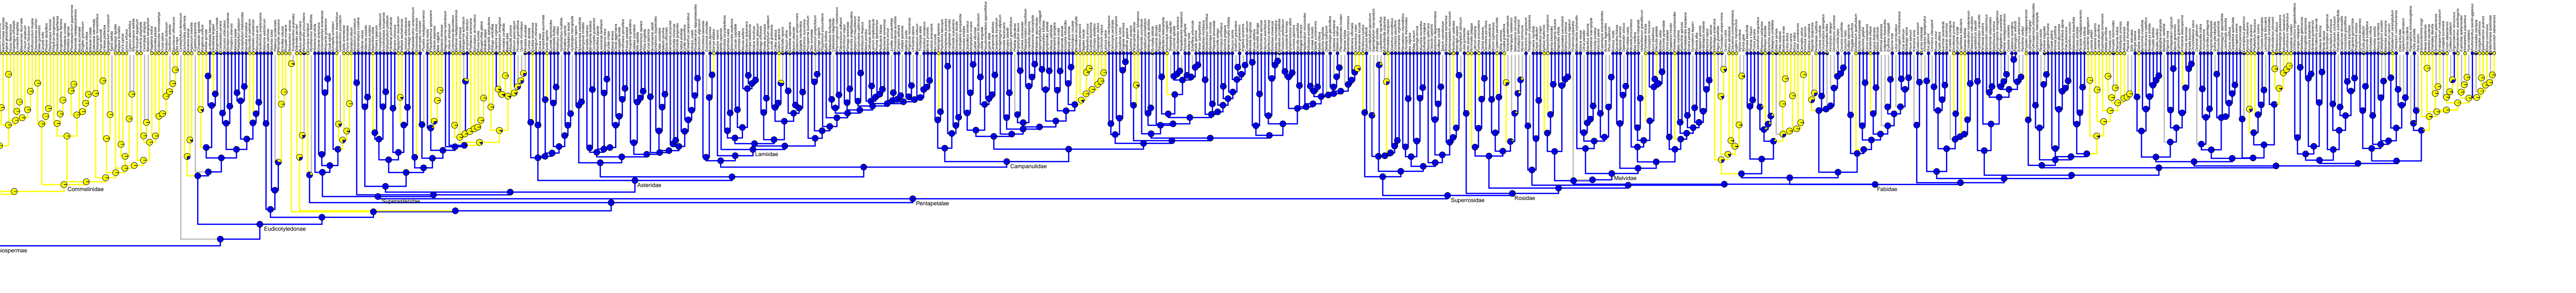

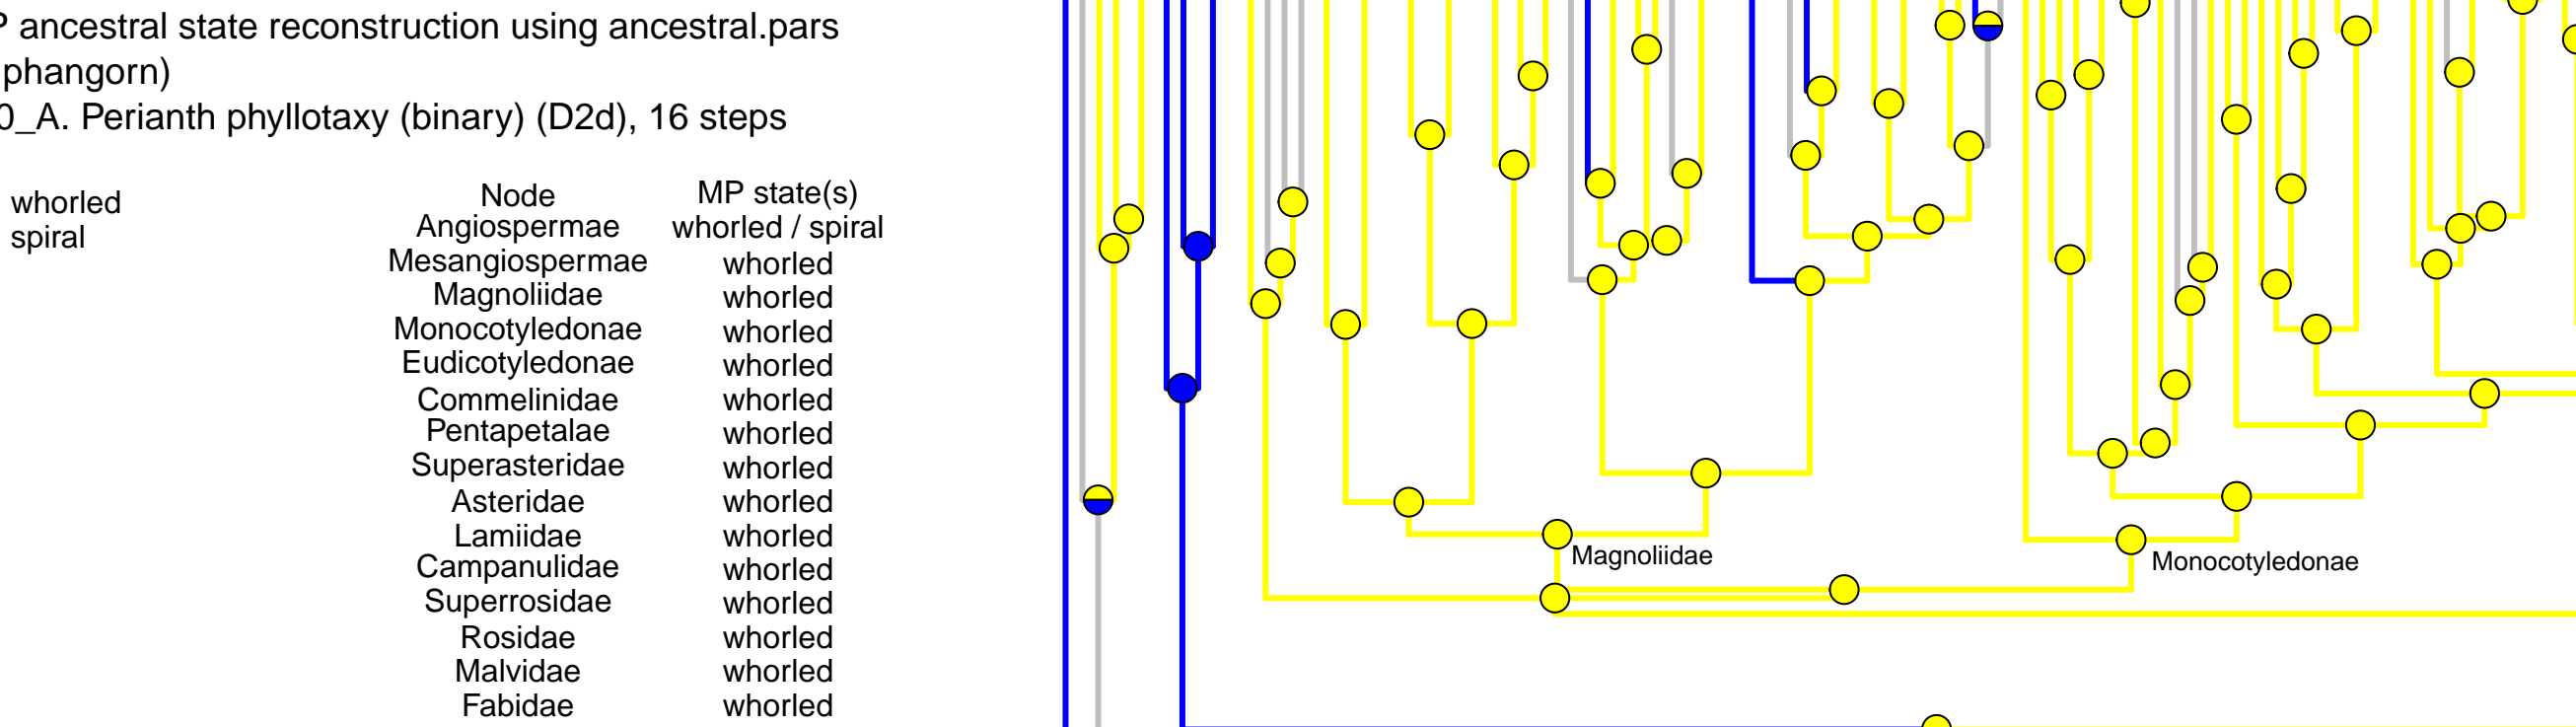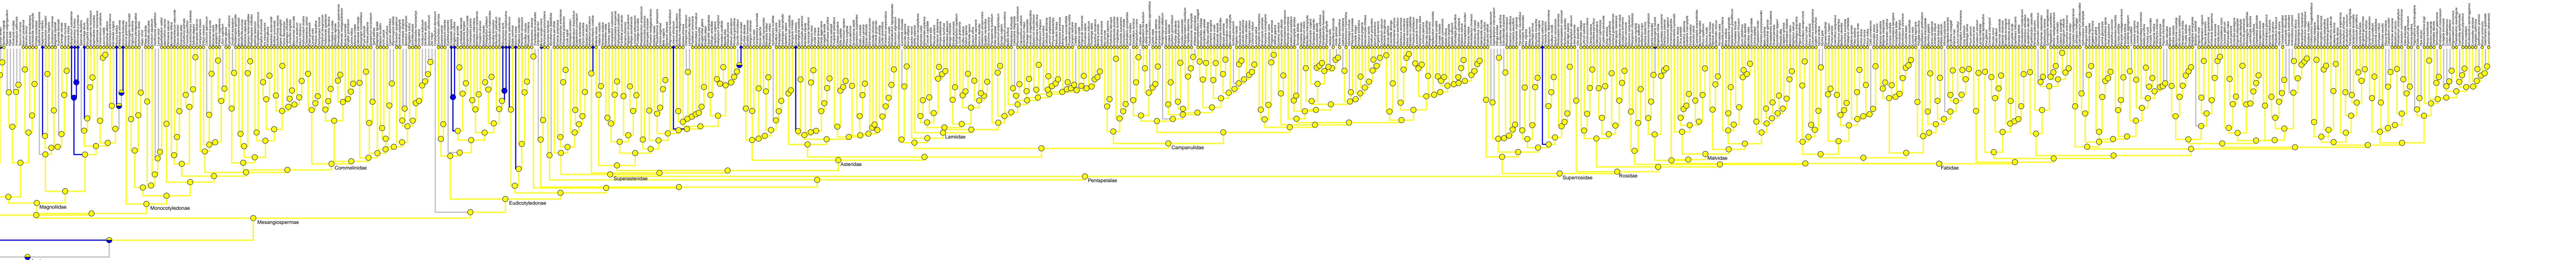



MP ancestral state reconstruction using ancestral.pars  
(R:phangorn)  
231\_A. Number of perianth whorls (D2c), 73 steps

- one (1)

● two (2)

● more than two (>2)

Node

Angiospermae

Mesangiospermae

Magnoliidae

Monocotyledonae

Eudicotyledonae

Commelinidae

Pentapetalae

Superasteridae

Asteridae

Lamiidae

Campanulidae

Superosidae

Rosidae

Malvidae

Fabidae

MP state(s)

more than two (>2)

more than two (>2)

more than two (>2)

two (2)

more than two (>2)

two (2)

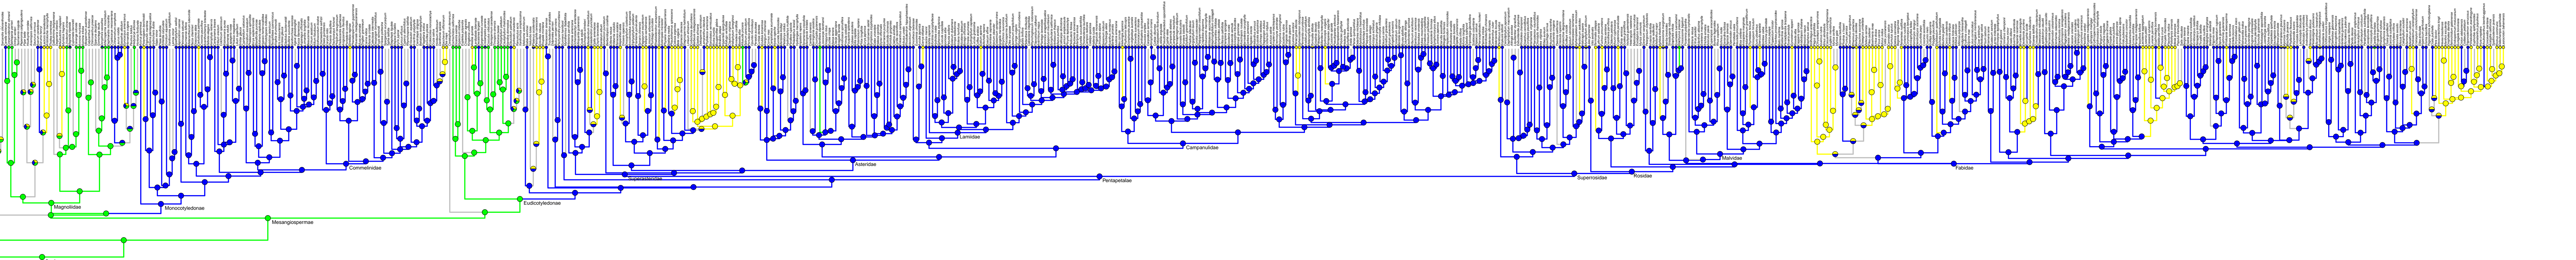

ML ancestral state reconstruction using rayDISC (R:corHMM)  
231\_A. Number of perianth whorls (D2c), ARDeq model

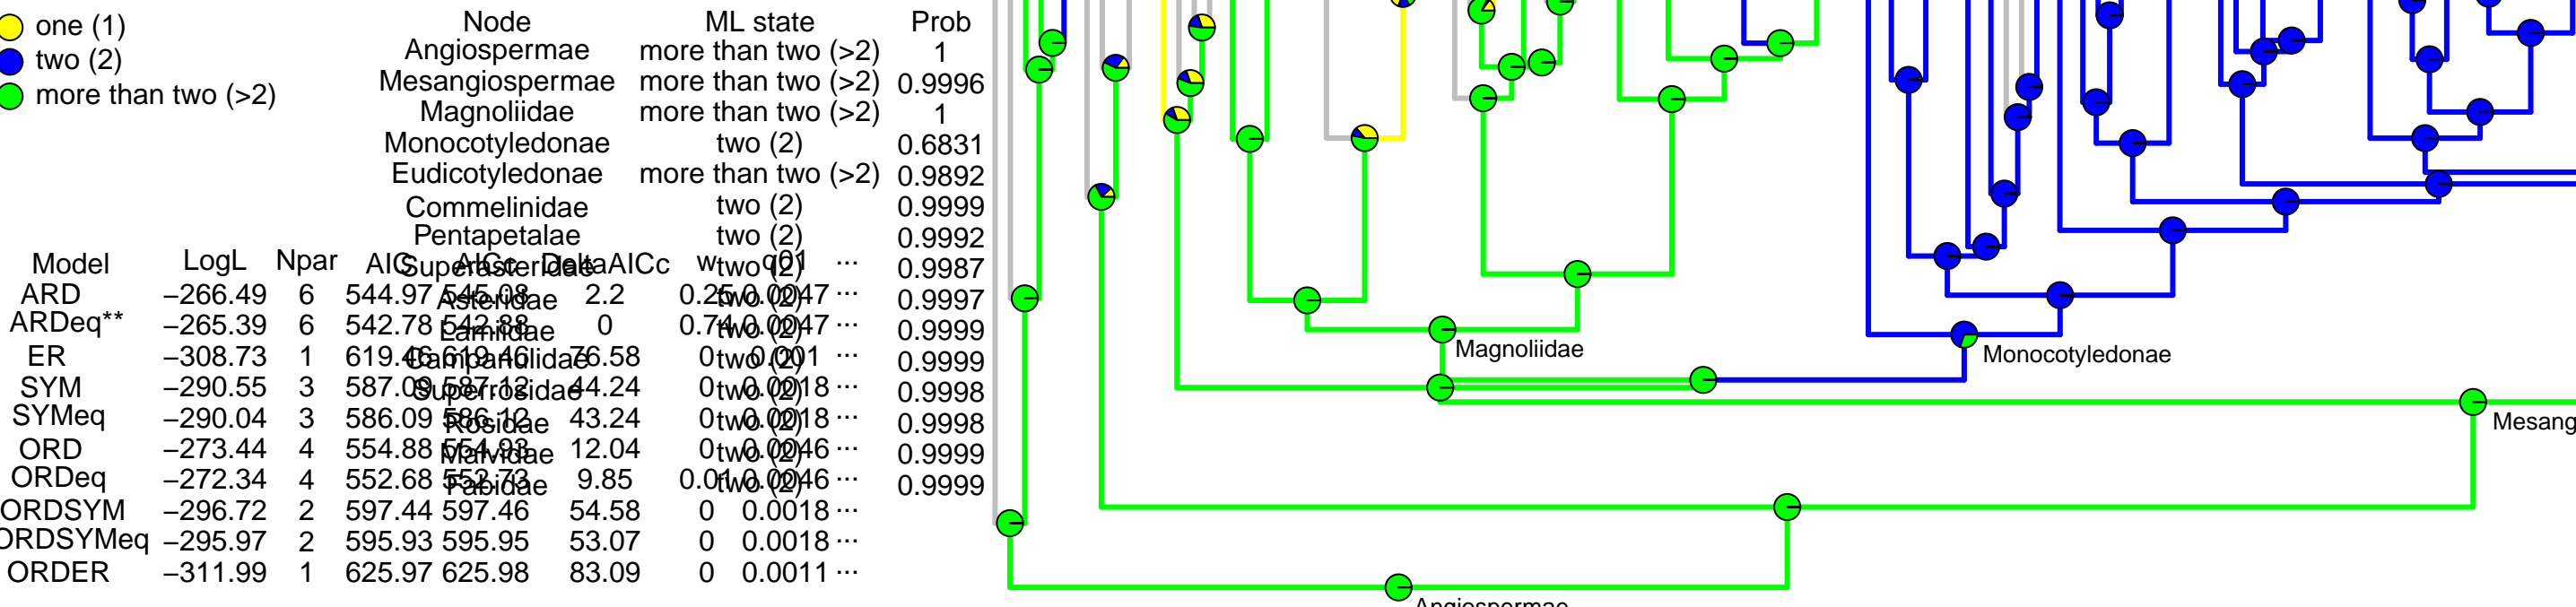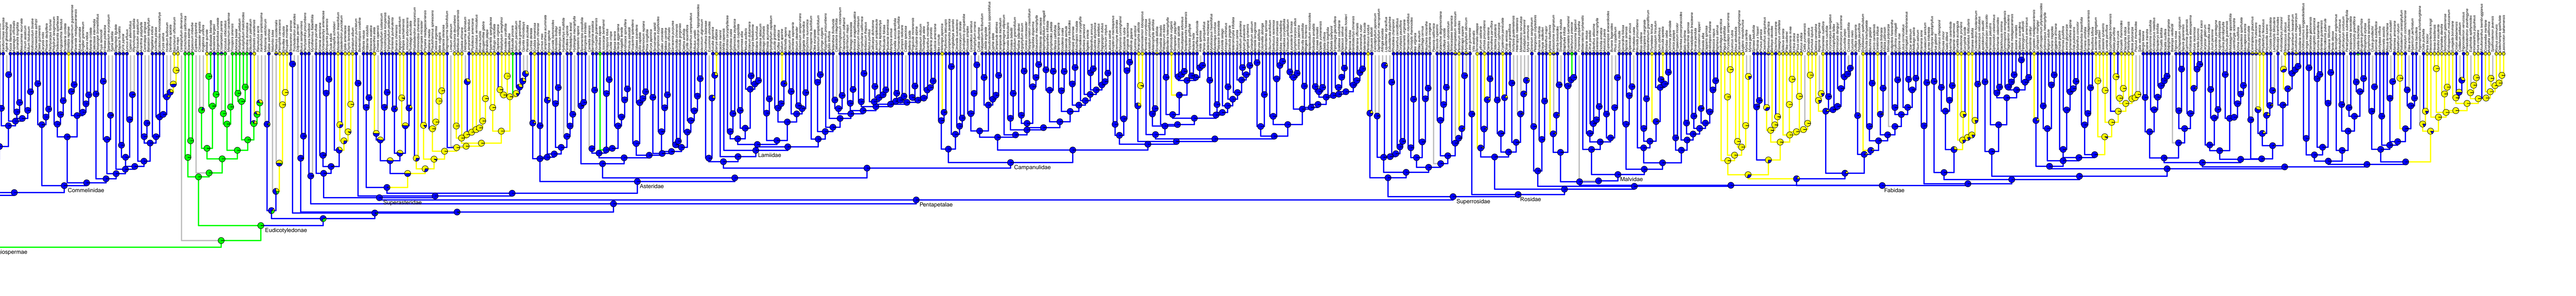



ML ancestral state reconstruction using rayDISC (R:corHMM)  
232\_A. Perianth merism (4-state) (D2c), SYMeq model

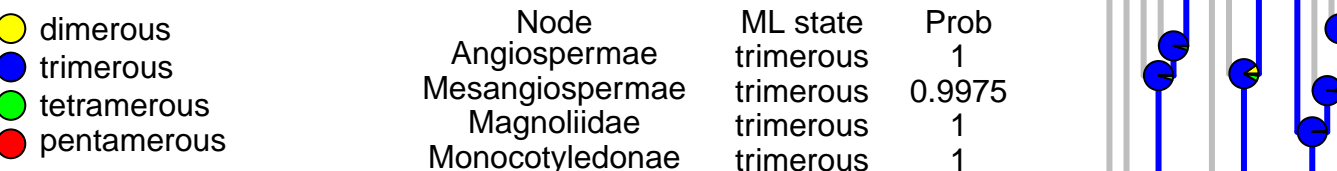

|  | Node            | ML state    | Prob   |
|--|-----------------|-------------|--------|
|  | Angiospermae    | trimerous   | 1      |
|  | Mesangiospermae | trimerous   | 0.9975 |
|  | Magnoliidae     | trimerous   | 1      |
|  | Monocotyledonae | trimerous   | 1      |
|  | Eudicotyledonae | trimerous   | 0.7223 |
|  | Commelinidae    | trimerous   | 1      |
|  | Pentapetalae    | pentamerous | 0.9991 |

| Model    | LogL    | Npar | AICc   | ΔAICc  | ΔAICc-wt | Posterior probability |
|----------|---------|------|--------|--------|----------|-----------------------|
| ARD      | -320.52 | 12   | 665.03 | 666.43 | 4.32     | 0.9997                |
| ARDeq    | -319.49 | 12   | 662.98 | 664.38 | 2.26     | 0.9997                |
| ER       | -361.07 | 1    | 724.13 | 725.53 | 63.00    | 0.0001                |
| SYM      | -325.81 | 6    | 663.03 | 664.43 | 2.61     | 0.9991                |
| SYMeq**  | -324.51 | 6    | 661.01 | 662.41 | 0.99     | 0.9991                |
| ORD      | -336.08 | 6    | 684.16 | 685.56 | 23.11    | 0.0001                |
| ORDeq    | -335.41 | 6    | 682.82 | 684.22 | 21.80    | 0.0001                |
| ORDSYM   | -345.1  | 3    | 696.2  | 696.23 | 35.11    | 0.0018                |
| ORDSYMeq | -343.87 | 3    | 693.75 | 693.78 | 32.66    | 0.0018                |
| ORDER    | -347.12 | 1    | 696.24 | 696.25 | 35.13    | 0.0023                |

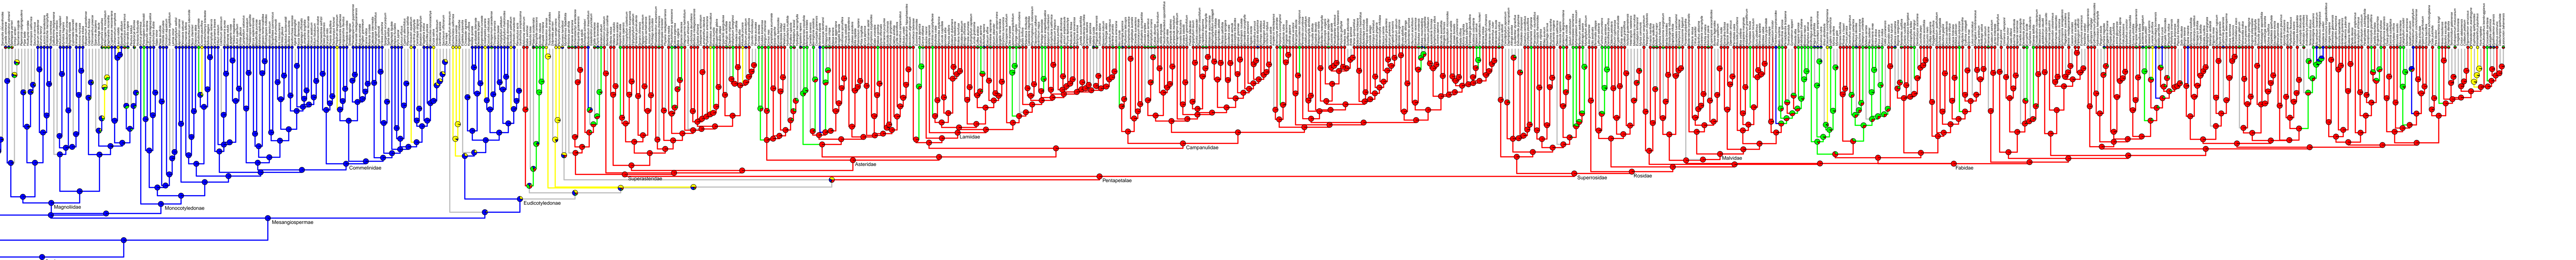



ML ancestral state reconstruction using rayDISC (R:corHMM)  
232\_B. Perianth merism (3-state) (D2c), ORD model

● trimerous  
● tetramerous  
● pentamerous

|          | Node            | ML state    | Prob   |
|----------|-----------------|-------------|--------|
|          | Angiospermae    | trimerous   | 0.8059 |
|          | Mesangiospermae | trimerous   | 0.8776 |
|          | Magnoliidae     | trimerous   | 0.9852 |
|          | Monocotyledonae | trimerous   | 0.9968 |
|          | Eudicotyledonae | trimerous   | 0.6132 |
|          | Commelinidae    | trimerous   | 1      |
|          | Pentapetalae    | pentamerous | 0.9857 |
| Model    | LogL            | Npar        | AICc   |
| ARD      | -253.8          | 6           | 519.6  |
| ARDeq    | -253.04         | 6           | 518.08 |
| ER       | -280.95         | 1           | 563.8  |
| SYM      | -255.96         | 3           | 517.3  |
| SYMeq    | -254.91         | 3           | 515.82 |
| ORD*     | -253.8          | 4           | 515.6  |
| ORDeq    | -254.1          | 4           | 516.2  |
| ORDSYM   | -257.57         | 2           | 519.14 |
| ORDSYMeq | -256.57         | 2           | 517.14 |
| ORDER    | -260.29         | 1           | 522.58 |

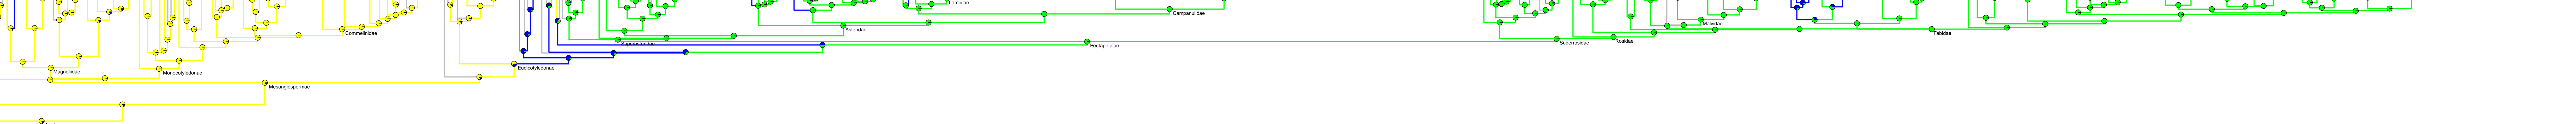

MP ancestral state reconstruction using ancestral.pars  
(R:phangorn)  
234\_A. Perianth differentiation (binary) (D2d), 64 steps

● undifferentiated

● differentiated

Node

Angiospermae

Mesangiospermae

Magnoliidae

Monocotyledonae

Eudicotyledonae

Commelinidae

Pentapetalae

Superasteridae

Asteridae

Lamiidae

Campanulidae

Superrosidae

Rosidae

Malvidae

Fabidae

MP state(s)

undifferentiated

undifferentiated

undifferentiated

undifferentiated

undifferentiated

undifferentiated

differentiated

differentiated

differentiated

differentiated

differentiated

differentiated

differentiated

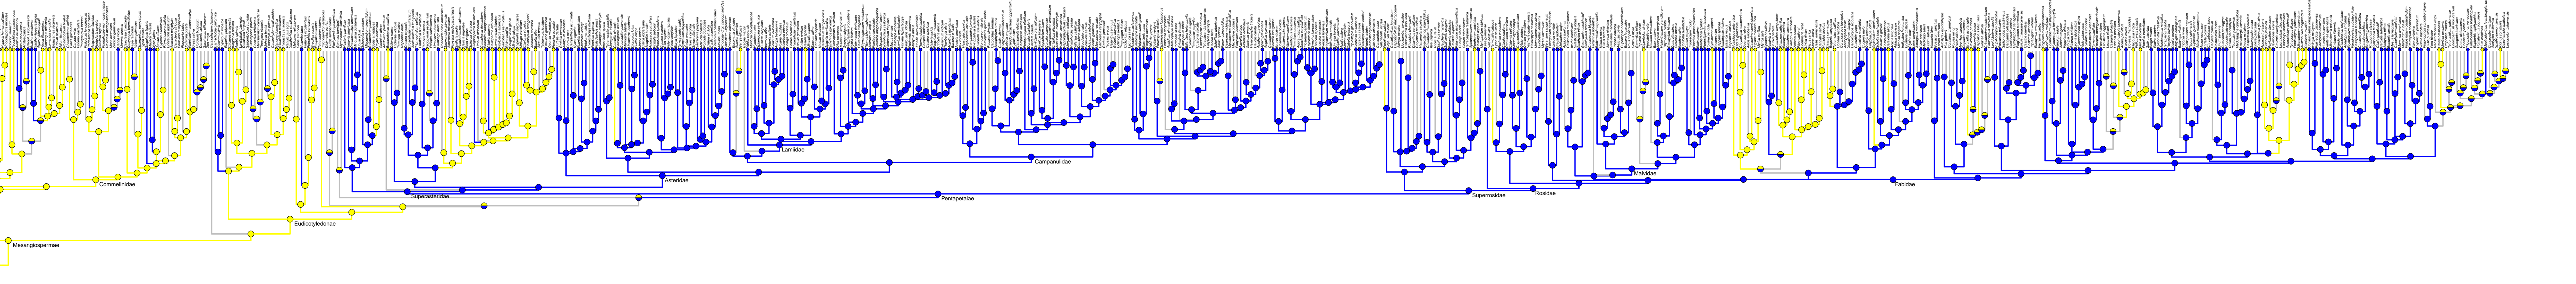

ML ancestral state reconstruction using rayDISC (R:corHMM)  
 234\_A. Perianth differentiation (binary) (D2d), ARDeq model

● undifferentiated  
 ● differentiated

| Node            | ML state         | Prob   |
|-----------------|------------------|--------|
| Angiospermae    | undifferentiated | 1      |
| Mesangiospermae | undifferentiated | 0.994  |
| Magnoliidae     | undifferentiated | 0.999  |
| Monocotyledonae | undifferentiated | 0.998  |
| Eudicotyledonae | undifferentiated | 0.9541 |
| Commelinidae    | undifferentiated | 0.998  |
| Pentapetalae    | undifferentiated | 0.9475 |
| Superasteridae  | differentiated   | 0.949  |
| Asteridae       | differentiated   | 0.9983 |
| Lamiidae        | differentiated   | 0.998  |
| Campanulidae    | differentiated   | 1      |
| Superosidae     | differentiated   | 0.9894 |

| Model | LogL    | Npar | AIC    | AICc   | AICw   | Diff. AIC | Diff. AICc | Diff. AICw | Weight |
|-------|---------|------|--------|--------|--------|-----------|------------|------------|--------|
| ARD   | -198.11 | 2    | 402.36 | 402.36 | 402.36 | 0.0000    | 0.0000     | 0.0000     | 0.9995 |
| ARD** | -198.51 | 2    | 401.02 | 401.02 | 401.02 | 0.0000    | 0.0000     | 0.0000     | 0.9994 |
| ER    | -206.88 | 1    | 415.76 | 415.76 | 415.76 | 14.72     | 0.0024     | 0.0024     | 0      |
| UNI01 | -230.87 | 1    | 463.74 | 463.75 | 463.75 | 62.71     | 0.0024     | 0.0024     | 0      |
| UNI10 | -232.79 | 1    | 467.58 | 467.58 | 467.58 | 66.54     | 0          | 0.0032     | 0      |

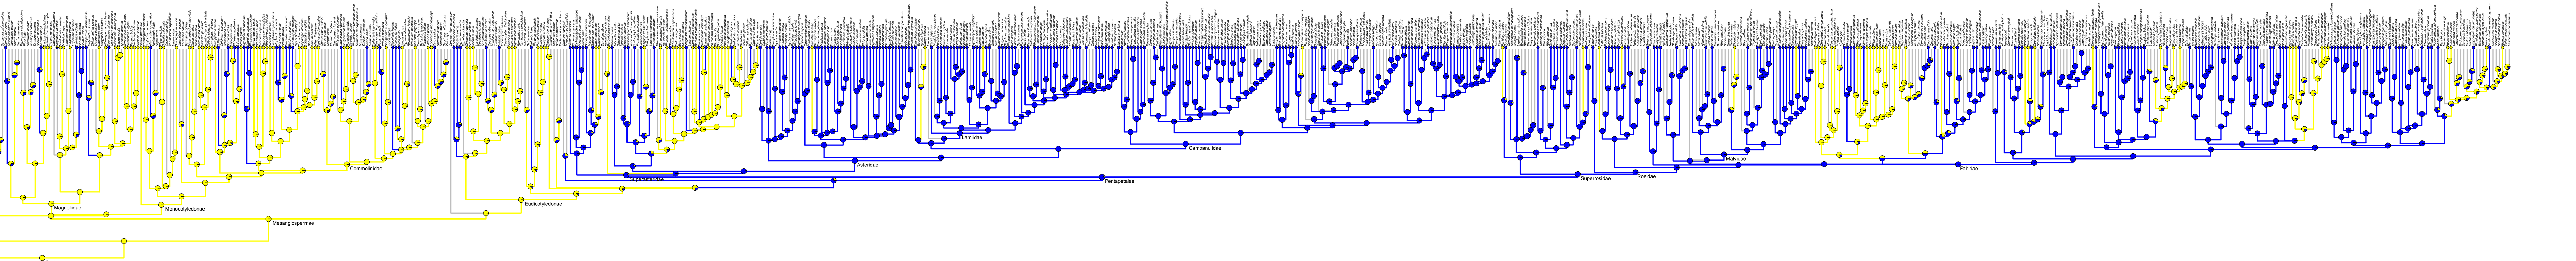

MP ancestral state reconstruction using ancestral.pars  
(R:phangorn)  
204\_A. Fusion of perianth (D2c), 77 steps

● free (<5%)  
● fused (>5%)

Node  
Angiospermae  
Mesangiospermae  
Magnoliidae  
Monocotyledonae  
Eudicotyledonae  
Commelinidae  
Pentapetalae  
Superasteridae  
Asteridae  
Lamiidae  
Campanulidae  
Superrosidae  
Rosidae  
Malvidae  
Fabidae

MP state(s)  
free (<5%)  
free (<5%) / fused (>5%)  
free (<5%) / fused (>5%)  
fused (>5%)  
free (<5%)  
free (<5%)  
free (<5%)  
free (<5%)

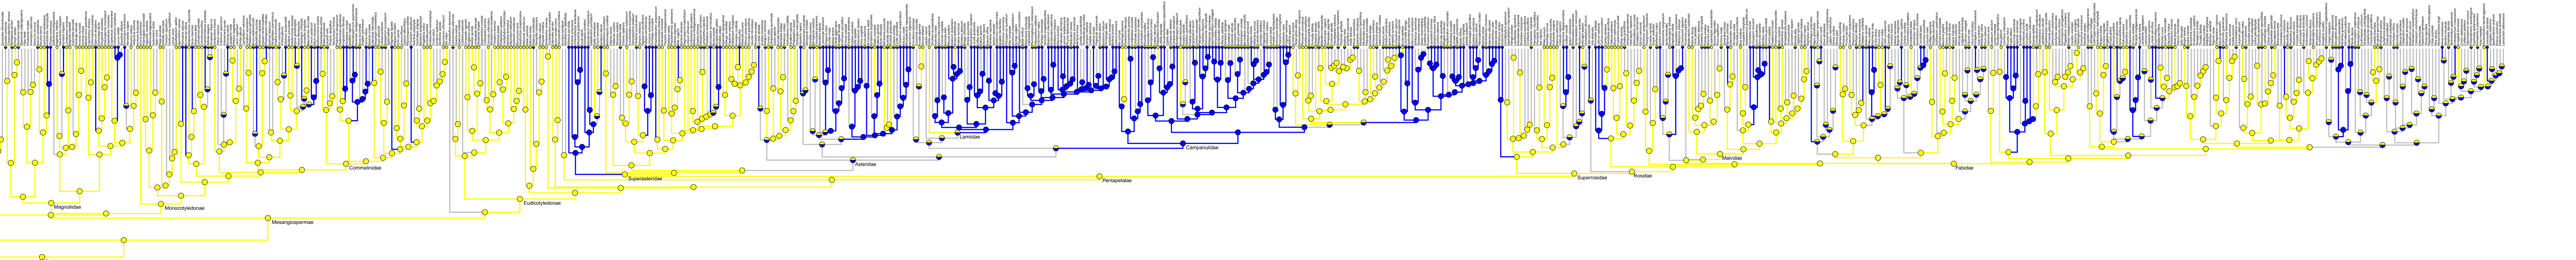

ML ancestral state reconstruction using rayDISC (R:corHMM)  
 204\_A. Fusion of perianth (D2c), ER model

| Node            | ML state    | Prob   |
|-----------------|-------------|--------|
| Angiospermae    | free (<5%)  | 0.9586 |
| Mesangiospermae | free (<5%)  | 0.9994 |
| Magnoliidae     | free (<5%)  | 0.9975 |
| Monocotyledonae | free (<5%)  | 0.9987 |
| Eudicotyledonae | free (<5%)  | 0.9992 |
| Commelinidae    | free (<5%)  | 0.9955 |
| Pentapetalae    | free (<5%)  | 0.9874 |
| Superasteridae  | free (<5%)  | 0.9606 |
| Asteridae       | free (<5%)  | 0.6657 |
| Lamiidae        | fused (>5%) | 0.9781 |
| Campanulidae    | fused (>5%) | 0.9789 |
| Superosidae     | free (<5%)  | 0.9886 |
| Rosidae         | free (<5%)  | 0.9895 |
| Fabidae         | free (<5%)  | 0.9967 |
| Malvidae        | free (<5%)  | 0.9967 |
| Superrosidae    | free (<5%)  | 0.9996 |
| Pentapetalae    | free (<5%)  | 0.9996 |
| Eudicotyledonae | free (<5%)  | 0.9996 |
| Commelinidae    | free (<5%)  | 0.9996 |
| Magnoliidae     | free (<5%)  | 0.9996 |
| Monocotyledonae | free (<5%)  | 0.9996 |
| Mesangiospermae | free (<5%)  | 0.9996 |

| Model | LogL    | Npar | AIC    | AICc   | AICw   | W     | Pre    | Post   | 0.0045 | 0.0075 |
|-------|---------|------|--------|--------|--------|-------|--------|--------|--------|--------|
| ARD   | -226.07 | 2    | 456.15 | 456.15 | 456.15 | 0.16  | 0.0045 | 0.0045 | 0.0045 | 0.0045 |
| ARD   | -225.46 | 2    | 454.92 | 454.92 | 454.92 | 0.39  | 0.0045 | 0.0045 | 0.0045 | 0.0045 |
| ER*   | -226.08 | 1    | 454.15 | 454.16 | 454.16 | 0     | 0.0045 | 0.0045 | 0.0045 | 0.0045 |
| UNI01 | -243.31 | 1    | 488.63 | 488.63 | 488.63 | 34.48 | 0      | 0.0045 | 0.0045 | 0.0045 |
| UNI10 | -234.89 | 1    | 471.78 | 471.79 | 471.79 | 17.63 | 0      | 0.0075 | 0.0075 | 0.0075 |

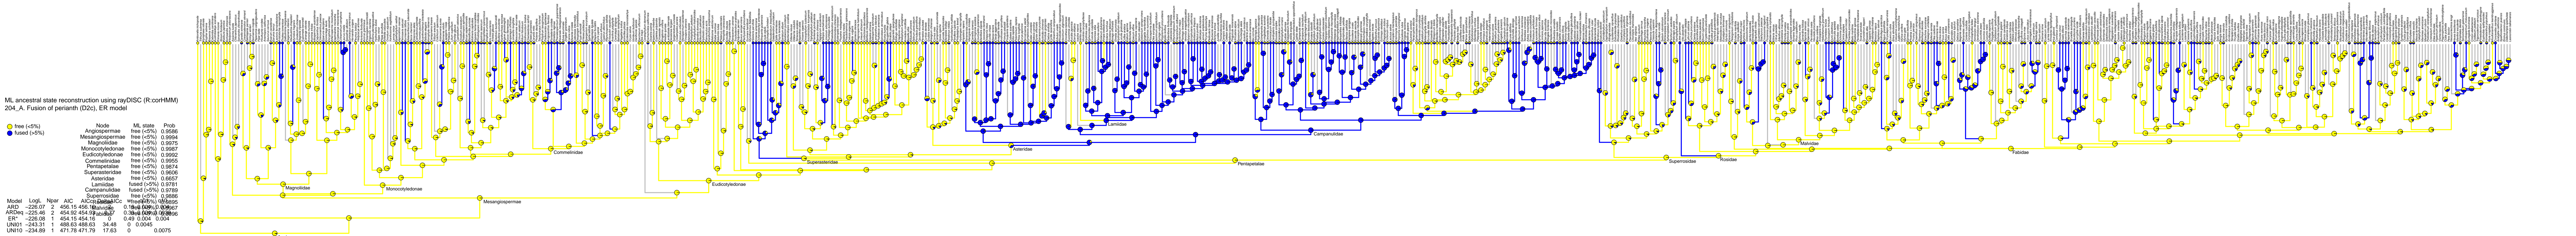

MP ancestral state reconstruction using ancestral.pars  
(R:phangorn)  
207\_A. Symmetry of perianth (binary) (D2d), 55 steps

● actinomorphic

● zygomorphic

Node

Angiospermae

Mesangiospermae

Magnoliidae

Monocotyledonae

Eudicotyledonae

Commelinidae

Pentapetalae

Superasteridae

Asteridae

Lamiidae

Campanulidae

Superosidae

Rosidae

Malvidae

Fabidae

MP state(s)

actinomorphic

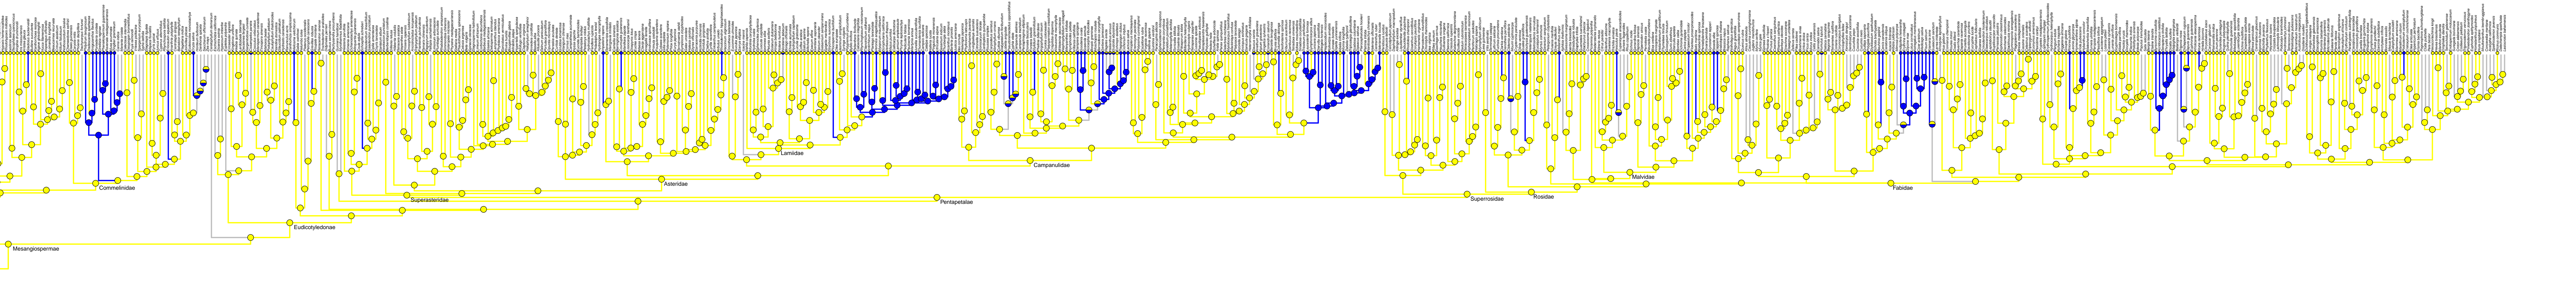

ML ancestral state reconstruction using rayDISC (R:corHMM)  
 207\_A. Symmetry of perianth (binary) (D2d), ARDeq model

● actinomorphic  
 ● zygomorphic

| Node            | ML state      | Prob   |
|-----------------|---------------|--------|
| Angiospermae    | actinomorphic | 0.9992 |
| Mesangiospermae | actinomorphic | 0.9995 |
| Magnoliidae     | actinomorphic | 0.9991 |
| Monocotyledonae | actinomorphic | 0.9964 |
| Eudicotyledonae | actinomorphic | 0.9988 |
| Commelinidae    | actinomorphic | 0.9948 |
| Pentapetalae    | actinomorphic | 1      |
| Superasteridae  | actinomorphic | 1      |
| Asteridae       | actinomorphic | 0.9999 |
| Lamiidae        | actinomorphic | 0.9976 |
| Campanulidae    | actinomorphic | 0.9999 |
| Superosidae     | actinomorphic | 1      |

| Model   | LogL    | Npar | AIC    | AICc   | AICw   | AICd   | Prob   |
|---------|---------|------|--------|--------|--------|--------|--------|
| ARD     | -209.71 | 2    | 423.41 | 423.39 | 423.40 | 0.0001 | 0.9999 |
| ARDeq** | -209.17 | 2    | 422.37 | 422.34 | 422.35 | 0.0001 | 0.9996 |
| ER      | -219.05 | 1    | 440.1  | 440.11 | 17.73  | 0      | 0.0015 |
| UNI01   | -263.15 | 1    | 528.3  | 528.3  | 105.92 | 0      | 0.0017 |
| UNI10   | -217.79 | 1    | 437.58 | 437.59 | 15.2   | 0      | 0.0151 |

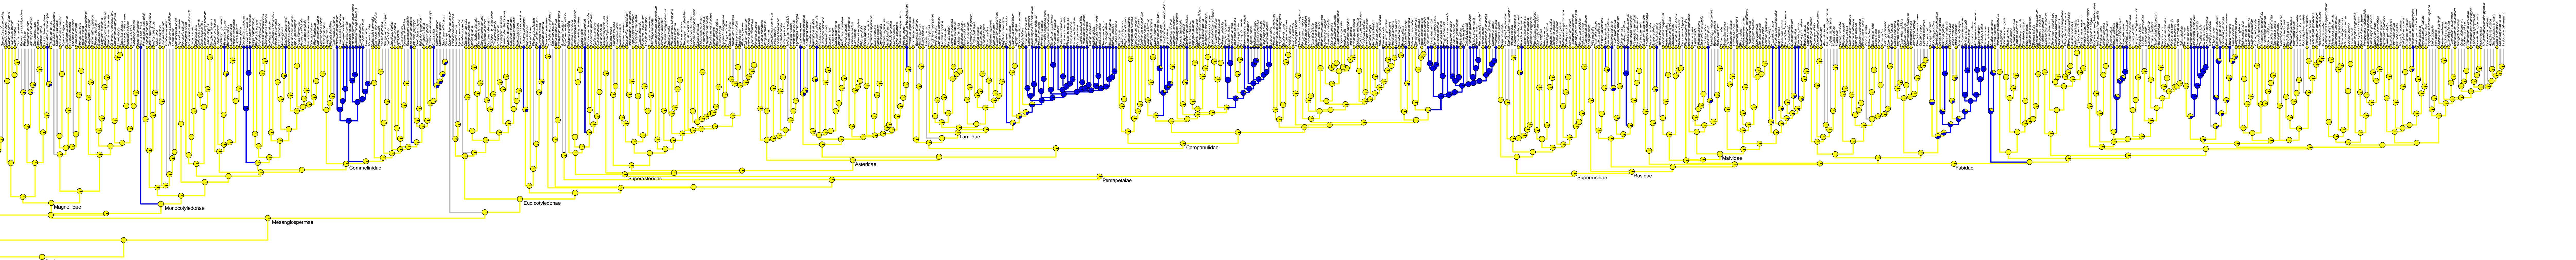

MP ancestral state reconstruction using ancestral.pars  
(R:phangorn)  
301\_B. Number of fertile stamens (3-state) (D2c), 155 steps

- one to five (1-5)
- six to ten (6-10)
- more than ten (>10)

- Node
- Angiospermae
- Mesangiospermae
- Magnoliidae
- Monocotyledonae
- Eudicotyledonae
- Commelinidae
- Pentapetalae
- Superasteridae
- Asteridae
- Lamiidae
- Campanulidae
- Superrosidae
- Rosidae
- Malvidae
- Fabidae

- MP state(s)
- more than ten (>10)
- one to five (1-5) / more than ten (>10)
- six to ten (6-10) / more than ten (>10)
- six to ten (6-10)
- one to five (1-5)
- six to ten (6-10)
- six to ten (6-10)
- six to ten (6-10)
- one to five (1-5) / six to ten (6-10)
- one to five (1-5)
- one to five (1-5)
- six to ten (6-10)

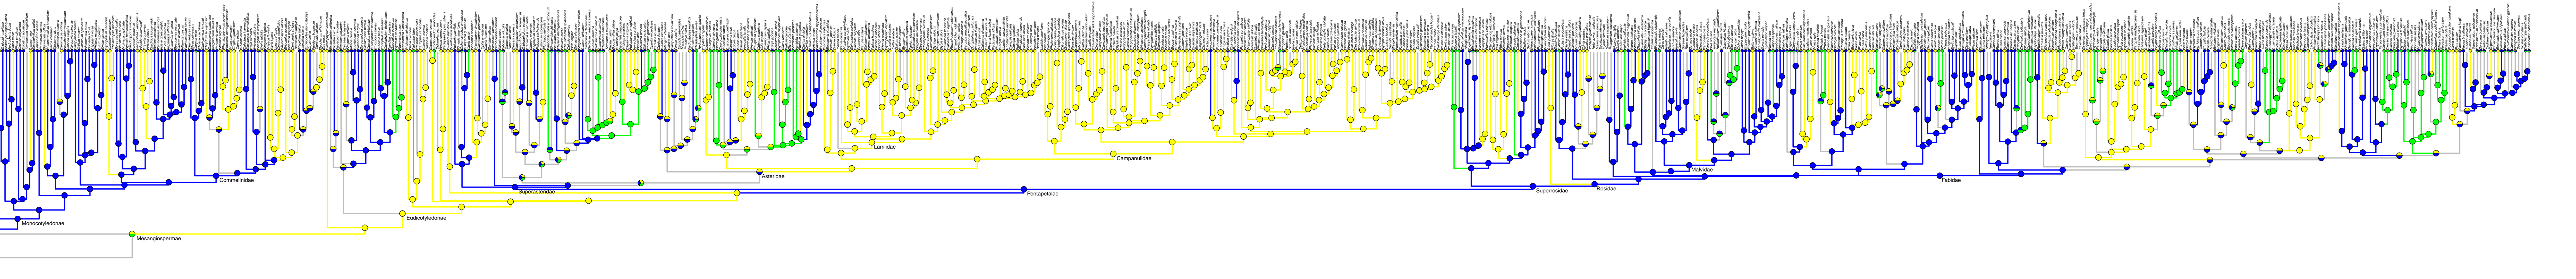





ML ancestral state reconstruction using rayDISC (R:corHMM)  
301\_C. Number of fertile stamens (binary) (D2c), ARDeq model

● one to six (1–6)  
● more than six (>6)

| Node            | ML state           | Prob   |
|-----------------|--------------------|--------|
| Angiospermae    | more than six (>6) | 1      |
| Mesangiospermae | more than six (>6) | 0.9988 |
| Magnoliidae     | more than six (>6) | 0.9997 |
| Monocotyledonae | more than six (>6) | 0.5053 |
| Eudicotyledonae | more than six (>6) | 0.9969 |
| Commelinidae    | one to six (1–6)   | 0.9999 |
| Pentapetalae    | more than six (>6) | 1      |
| Superasteridae  | more than six (>6) | 1      |
| Asteridae       | more than six (>6) | 0.9998 |
| Lamiidae        | one to six (1–6)   | 0.9992 |
| Campanulidae    | one to six (1–6)   | 0.9955 |
| Superrosidae    | more than six (>6) | 1      |
| Rosidae         | more than six (>6) | 0.9999 |

| Model   | LogL    | Npar | AIC    | AICc   | AICw   | AICc   | AICw   |
|---------|---------|------|--------|--------|--------|--------|--------|
| ARD     | -290.01 | 2    | 584.02 | 584.02 | 584.02 | 584.02 | 584.02 |
| ARDeq** | -289.32 | 2    | 582.63 | 582.63 | 582.63 | 582.63 | 582.63 |
| ER      | -319.76 | 1    | 641.51 | 641.52 | 58.87  | 0      | 0.0029 |
| UNI01   | -368.16 | 1    | 738.31 | 738.32 | 155.67 | 0      | 0.0043 |
| UNI10   | -327.03 | 1    | 656.07 | 656.07 | 73.43  | 0      | 0.0067 |

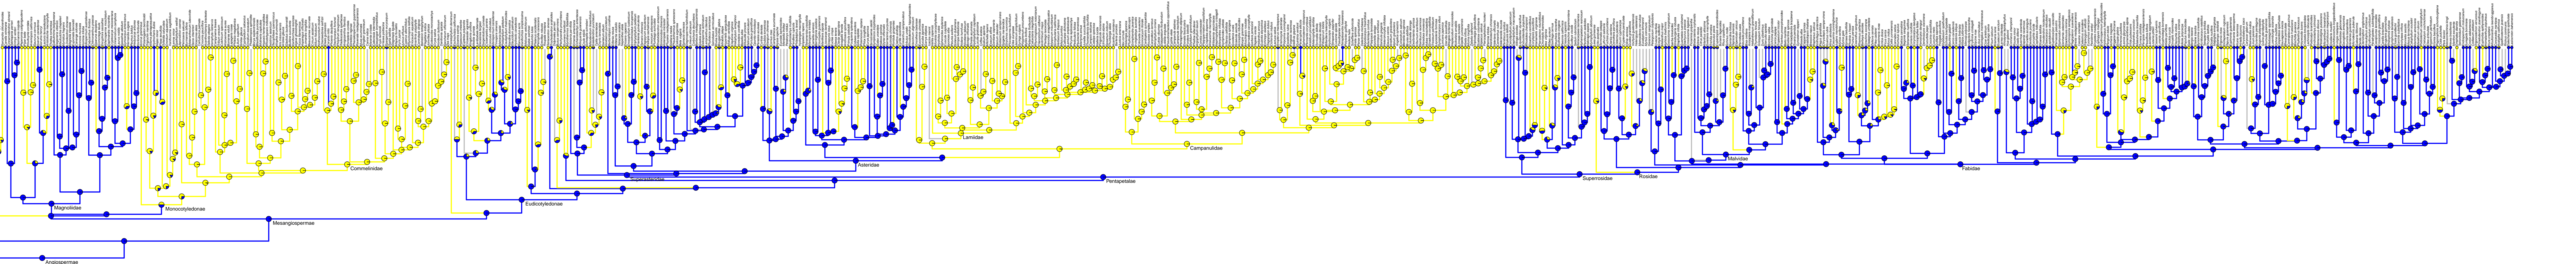



ML ancestral state reconstruction using rayDISC (R:corHMM)  
330 A. Androecium structural phyllotaxy (binary) (D2d), ARD model

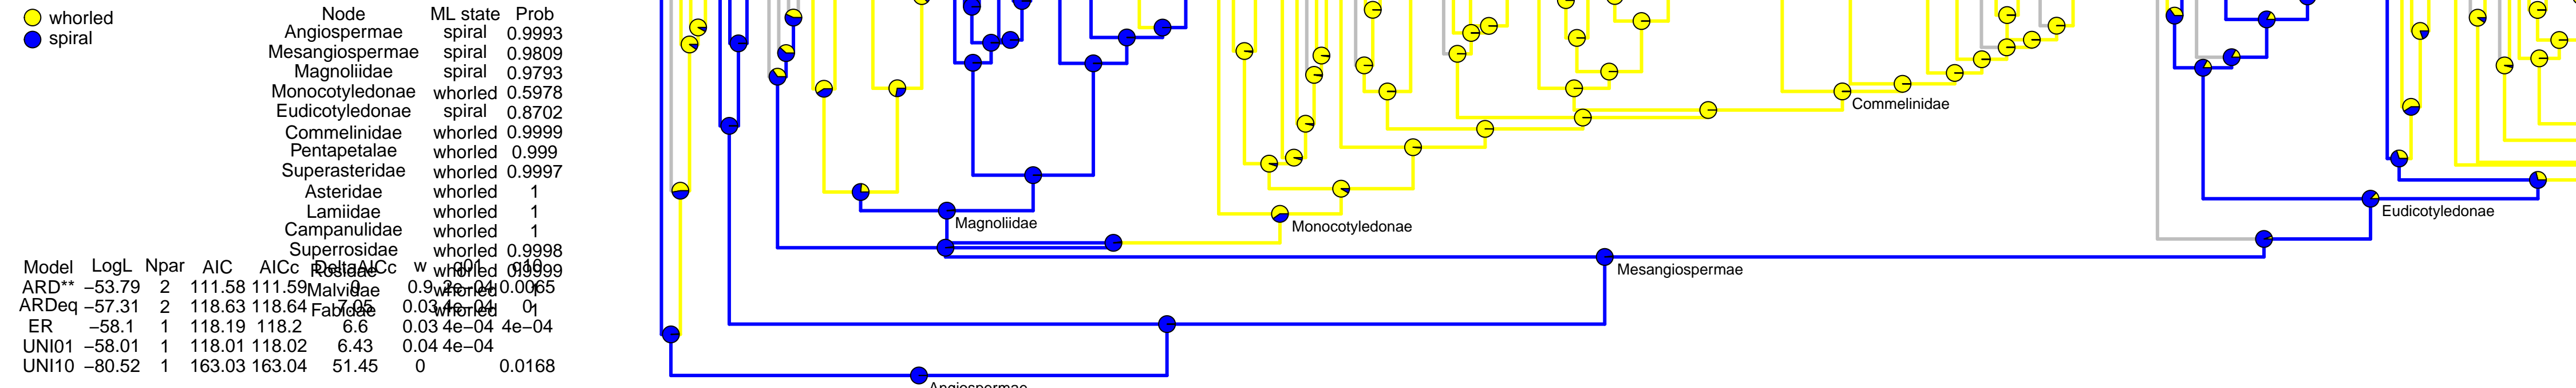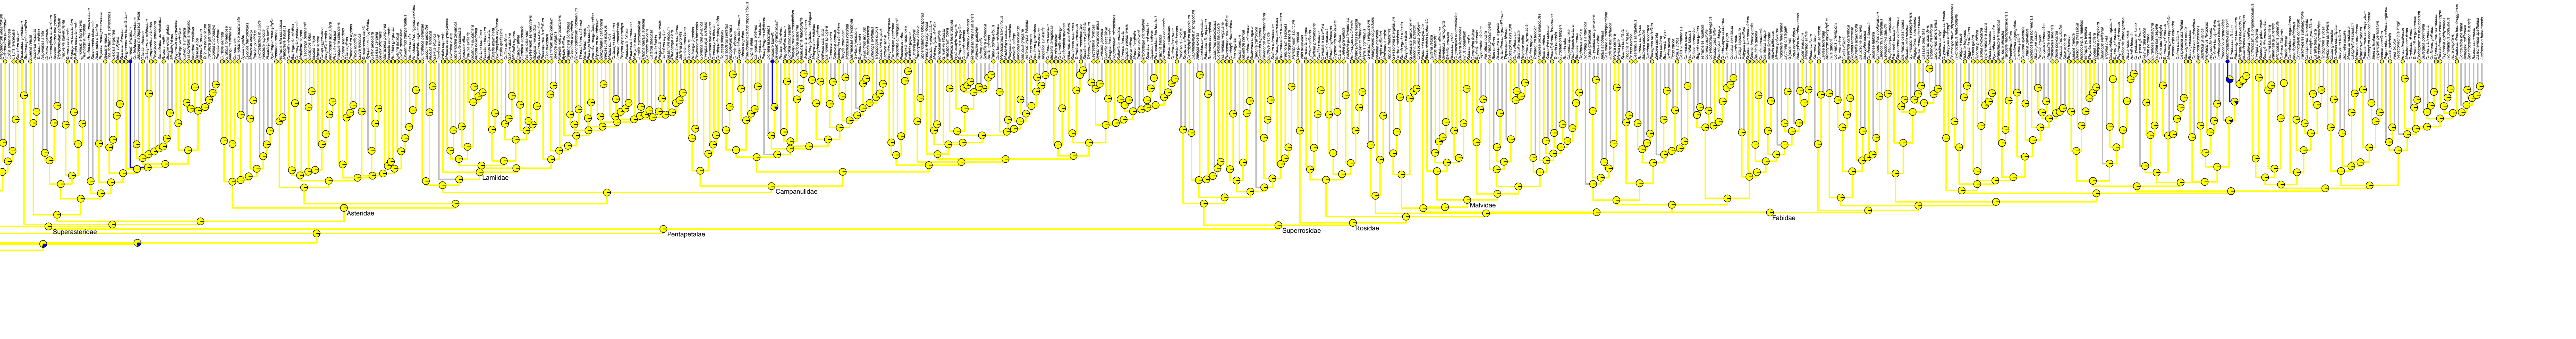

MP ancestral state reconstruction using ancestral.pars  
(R:phangorn)

- one (1)
- two (2)
- more than two (>2)

| Node            | MP state(s)        |
|-----------------|--------------------|
| Angiospermae    | more than two (>2) |
| Angiospermae    | more than two (>2) |
| Magnoliidae     | more than two (>2) |
| Monocotyledonae | two (2)            |
| Eudicotyledonae | more than two (>2) |
| Commelinidae    | two (2)            |
| Pentapetalae    | one (1)            |
| Superasteridae  | one (1)            |
| Asteridae       | one (1)            |
| Lamiidae        | one (1)            |
| Campanulidae    | one (1)            |
| Superrosidae    | one (1)            |
| Rosidae         | one (1)            |
| Malvidae        | one (1) / two (2)  |
| Fabidae         | one (1) / two (2)  |

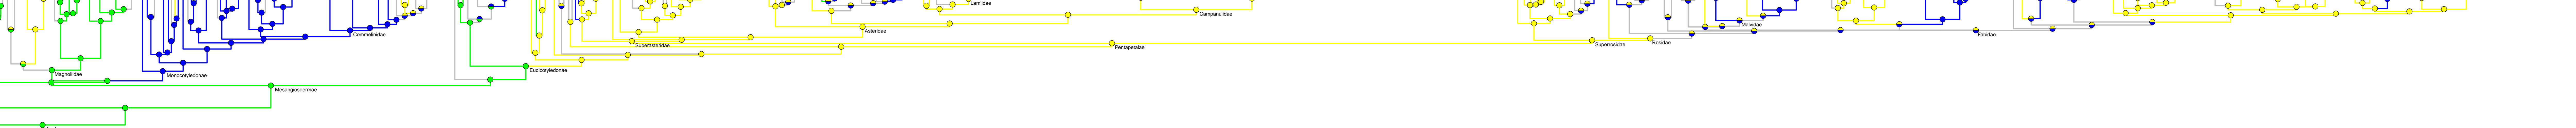





ML ancestral state reconstruction using rayDISC (R:corHMM)  
332\_A. Androecium structural merism (4–state) (D2c), SYMeq model

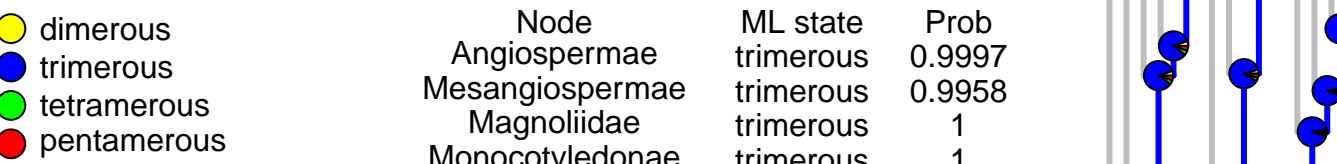

| Model   | LogL    | Npar | AICc   | ΔAICc  | Bayes factor | Posterior probability |
|---------|---------|------|--------|--------|--------------|-----------------------|
| ARD     | -222.22 | 12   | 468.43 | 168.33 | 8.74         | 0.999                 |
| ARDeq   | -221.44 | 12   | 466.88 | 166.78 | 7.19         | 0.999                 |
| ER      | -238.12 | 1    | 478.25 | 183.11 | 8.1          | 0.999                 |
| SYM     | -225.17 | 6    | 462.35 | 164.82 | 3.35         | 0.999                 |
| SYMeq** | -223.99 | 6    | 459.98 | 162.45 | 2.35         | 0.999                 |
| ORD     | -235.11 | 6    | 482.23 | 185.14 | 22.2         | 0.999                 |
| ORDeq   | -235.28 | 6    | 482.57 | 185.48 | 22.5         | 0.999                 |
| ORDSYM  | -258.34 | 3    | 522.68 | 522.71 | 62.62        | 0.0019                |
| ORDSYMq | -257.5  | 3    | 520.99 | 521.02 | 60.93        | 0.0019                |
| ORDER   | -259.3  | 1    | 520.59 | 520.6  | 60.51        | 0.0029                |

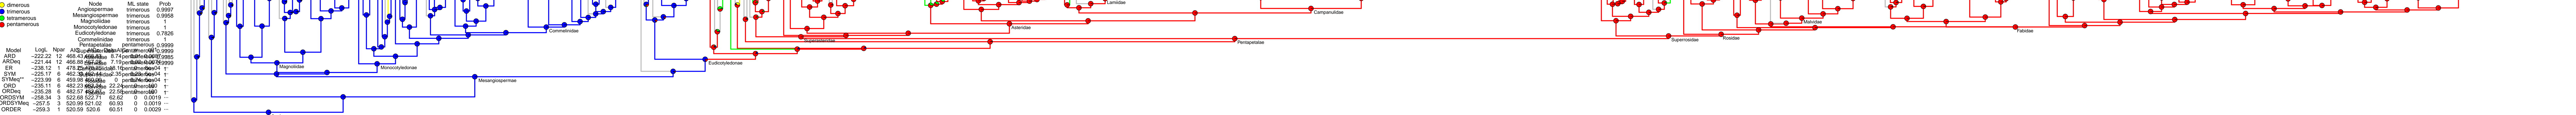

ancestral state reconstruction using ancestral.pars  
(phangorn)

trimerous  
tetramerous  
pentamerous

| Node            | MP state(s)                           |
|-----------------|---------------------------------------|
| Angiospermae    | trimerous / tetramerous / pentamerous |
| Mesangiospermae | trimerous / tetramerous / pentamerous |
| Magnoliidae     | trimerous                             |
| Monocotyledonae | trimerous                             |
| Eudicotyledonae | trimerous / tetramerous / pentamerous |
| Commelinidae    | trimerous                             |
| Pentapetalae    | pentamerous                           |
| Superasteridae  | pentamerous                           |
| Asteridae       | pentamerous                           |
| Lamiidae        | pentamerous                           |
| Campanulidae    | pentamerous                           |
| Superrosidae    | pentamerous                           |
| Rosidae         | pentamerous                           |
| Malvidae        | pentamerous                           |
| Fabidae         | pentamerous                           |

A phylogenetic tree with yellow branches and nodes. A specific node is highlighted with a blue circle. The label "Magnoliidae" is placed next to this node. The tree shows a complex branching pattern with several other nodes marked by yellow circles.

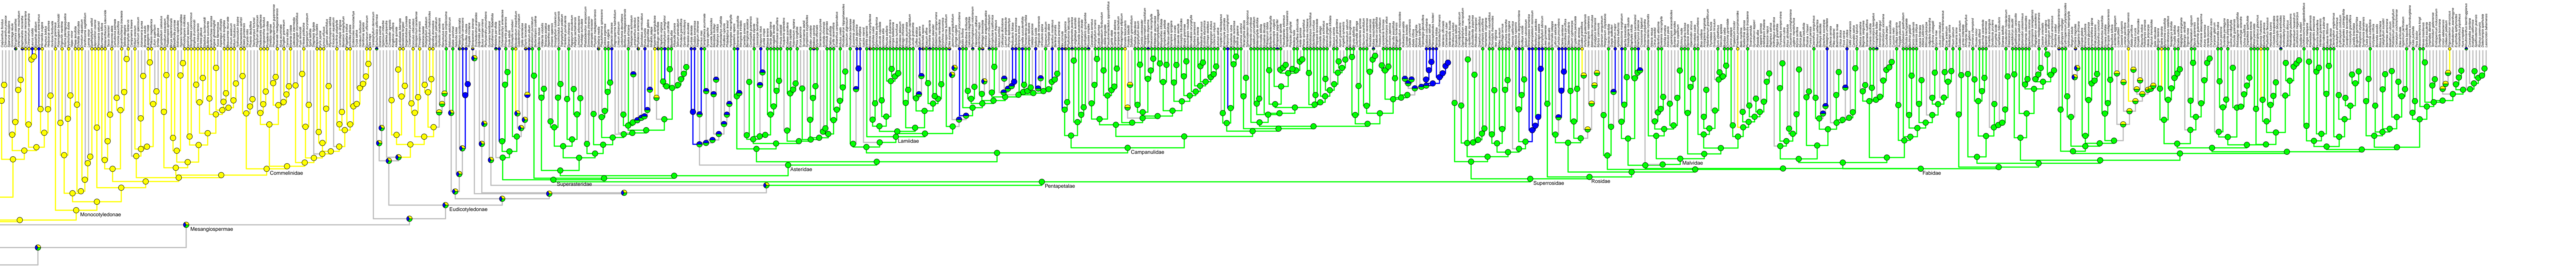







MP ancestral state reconstruction using ancestral.pars  
(R:phangorn)  
311\_A. Anther orientation (D2d), 107 steps

- introrse
- latorse
- extrorse

| Node            | MP state(s)         |
|-----------------|---------------------|
| Angiospermae    | introrse            |
| Angiospermae    | introrse / extrorse |
| Magnoliidae     | extrorse            |
| Monocotyledonae | introrse            |
| Dicotyledonae   | introrse / extrorse |
| Commelinidae    | introrse            |
| Pentapetalae    | introrse            |
| Superasteridae  | introrse            |
| Asteridae       | introrse            |
| Lamiidae        | introrse            |
| Campanulidae    | introrse            |
| Superrosidae    | introrse            |
| Rosidae         | introrse            |
| Malvidae        | introrse            |
| Fabidae         | introrse            |

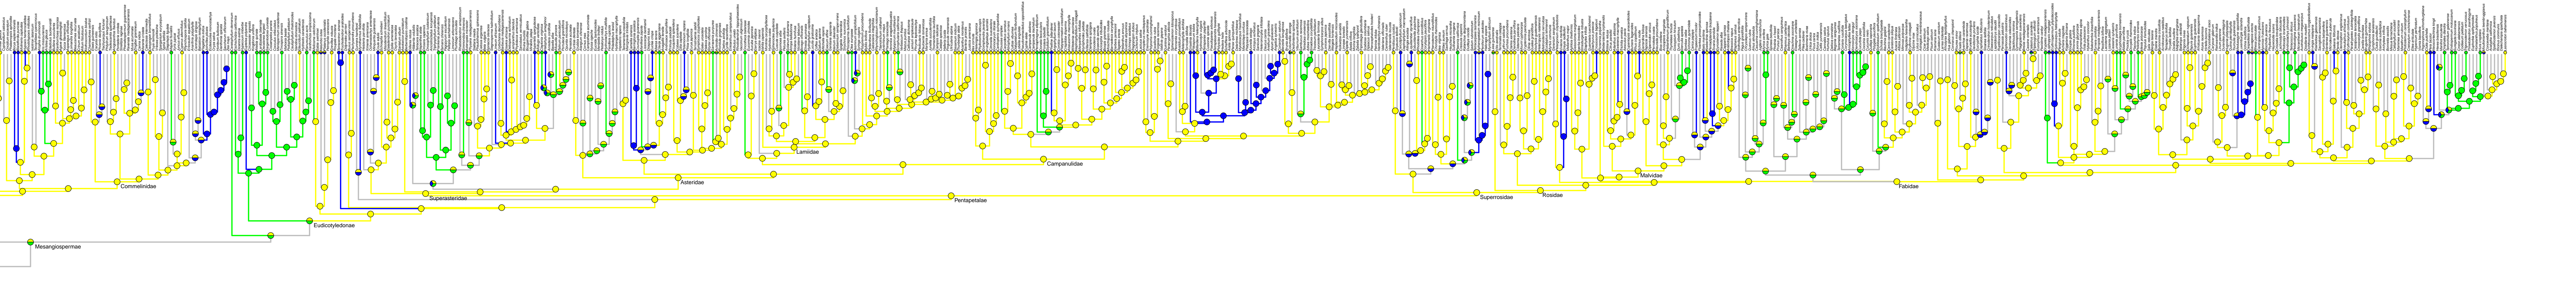

ML ancestral state reconstruction using rayDISC (R:corHMM)  
 311\_A. Anther orientation (D2d), ER model

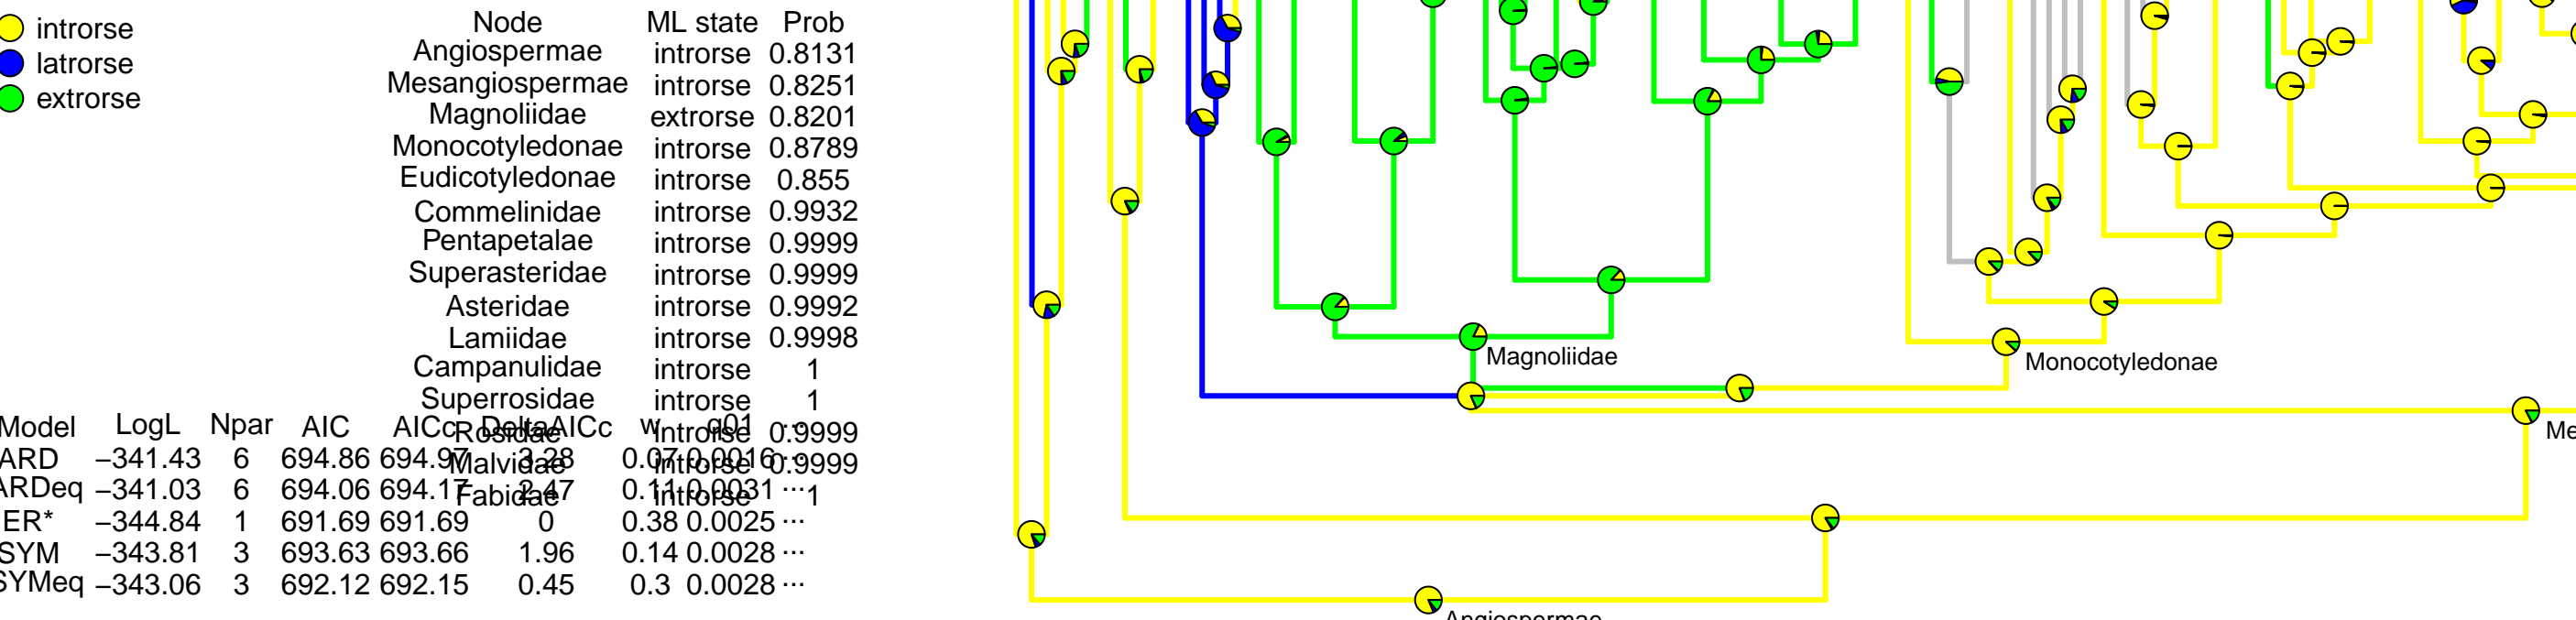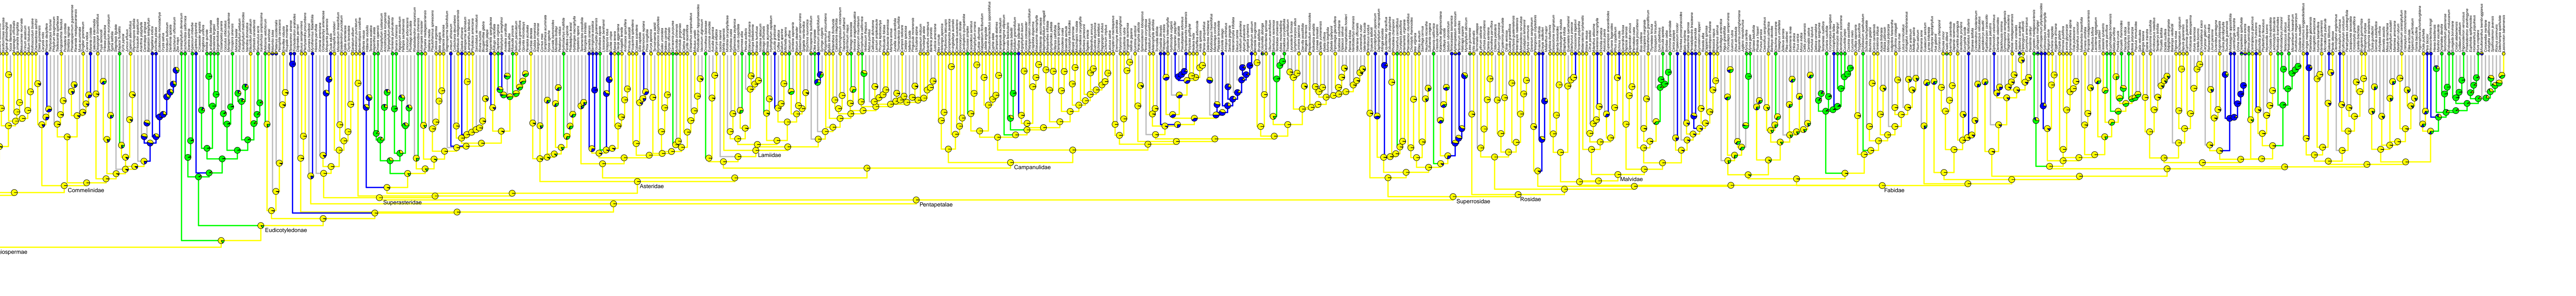

MP ancestral state reconstruction using ancestral.pars  
R:phangorn)  
12\_A. Anther attachment (binary) (D2d), 97 steps

| Node            | MP state(s)            |
|-----------------|------------------------|
| Angiospermae    | basifixed              |
| Mesangiospermae | basifixed              |
| Magnoliidae     | basifixed              |
| Monocotyledonae | basifixed              |
| Eudicotyledonae | basifixed              |
| Commelinidae    | basifixed              |
| Pentapetalae    | basifixed              |
| Superasteridae  | basifixed              |
| Asteridae       | basifixed              |
| Lamiidae        | basifixed              |
| Campanulidae    | basifixed / dorsifixed |
| Superrosidae    | basifixed              |
| Rosidae         | dorsifixed             |
| Malvidae        | dorsifixed             |
| Fabidae         | dorsifixed             |

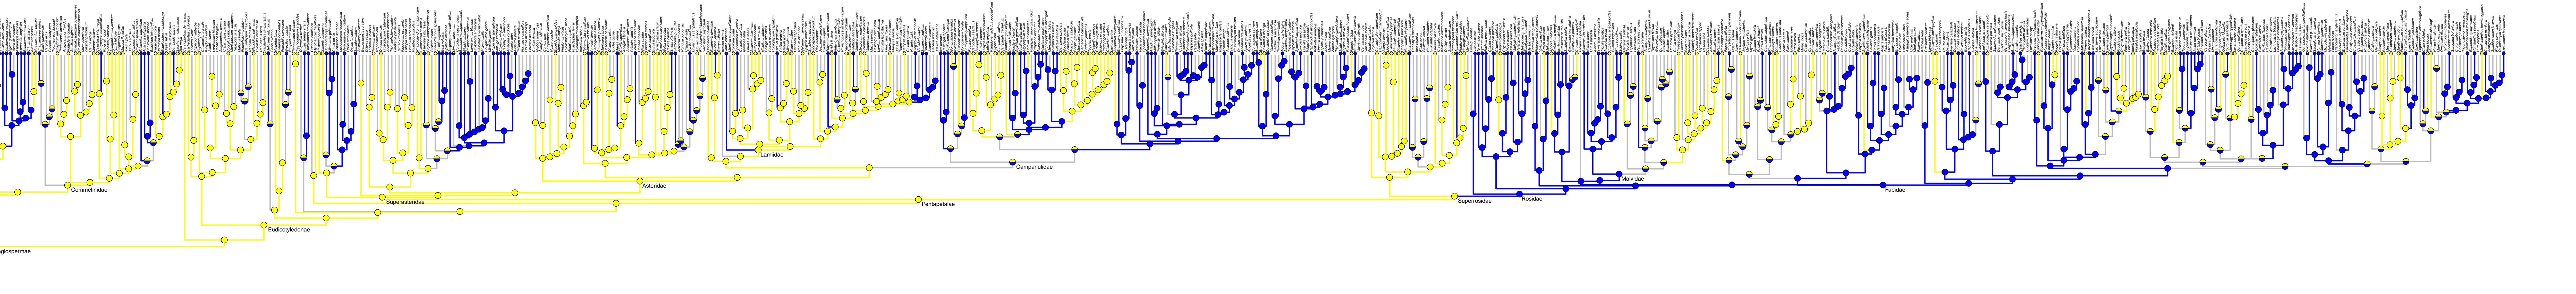



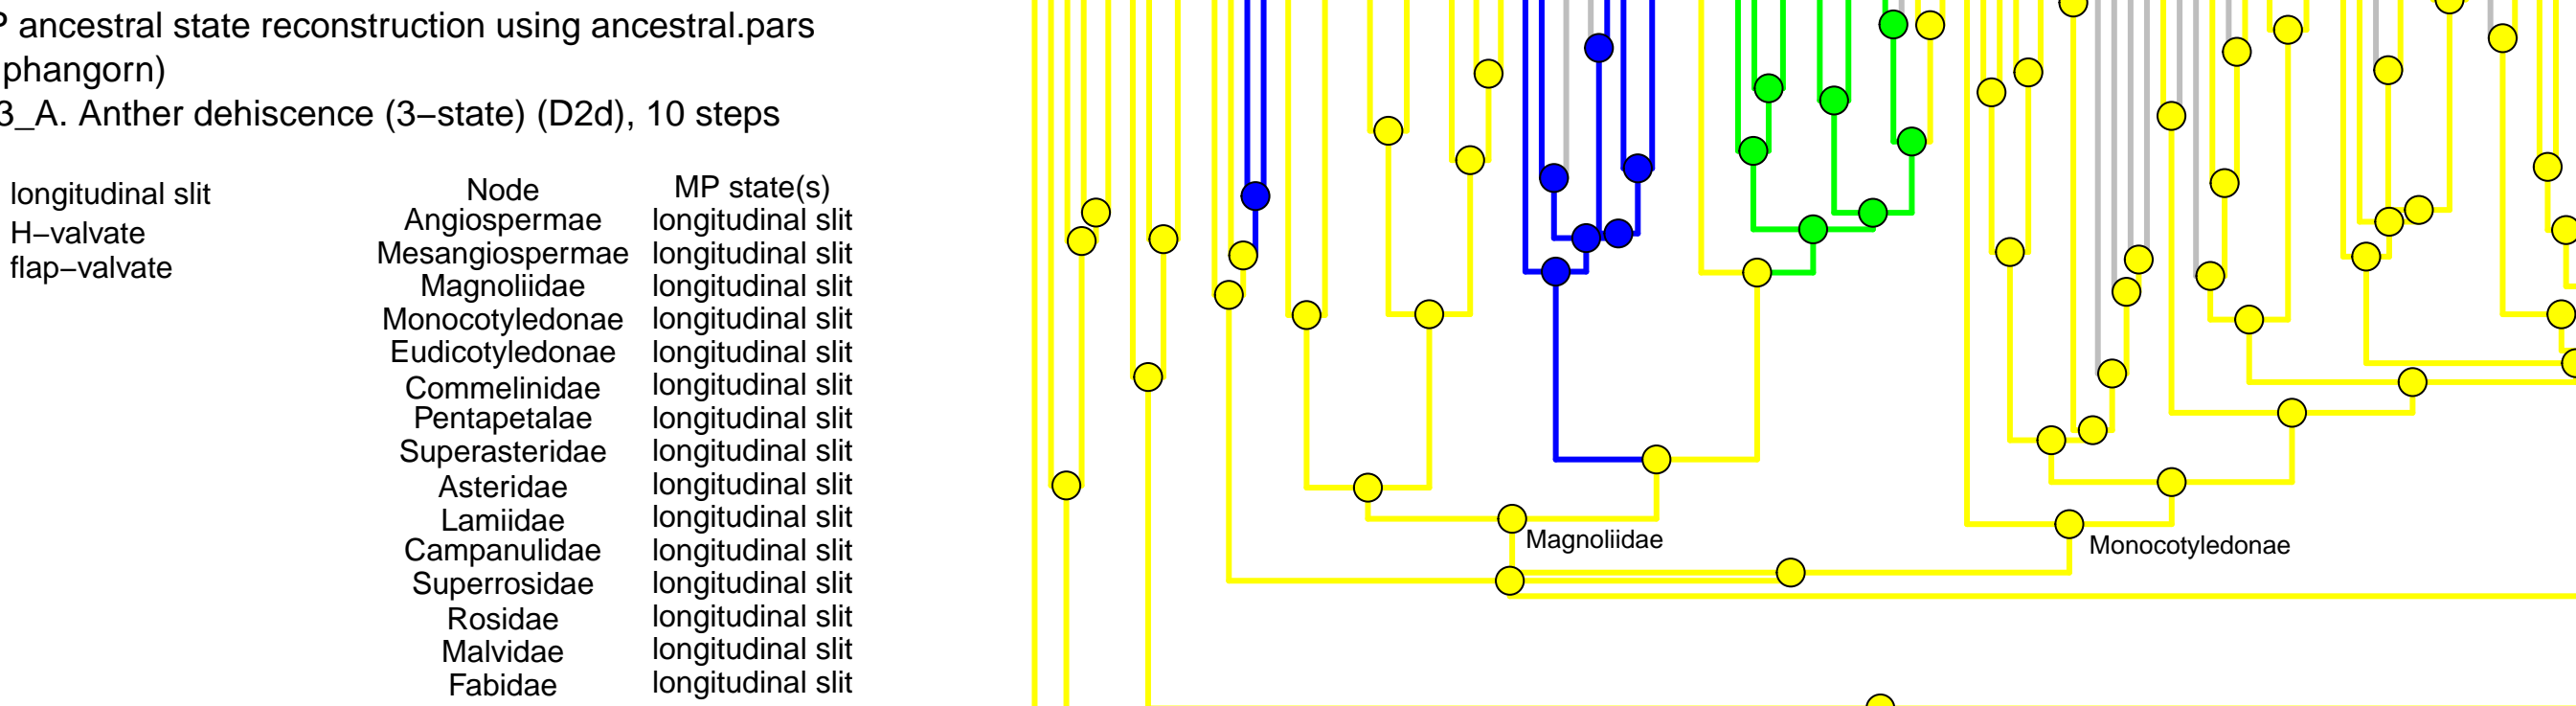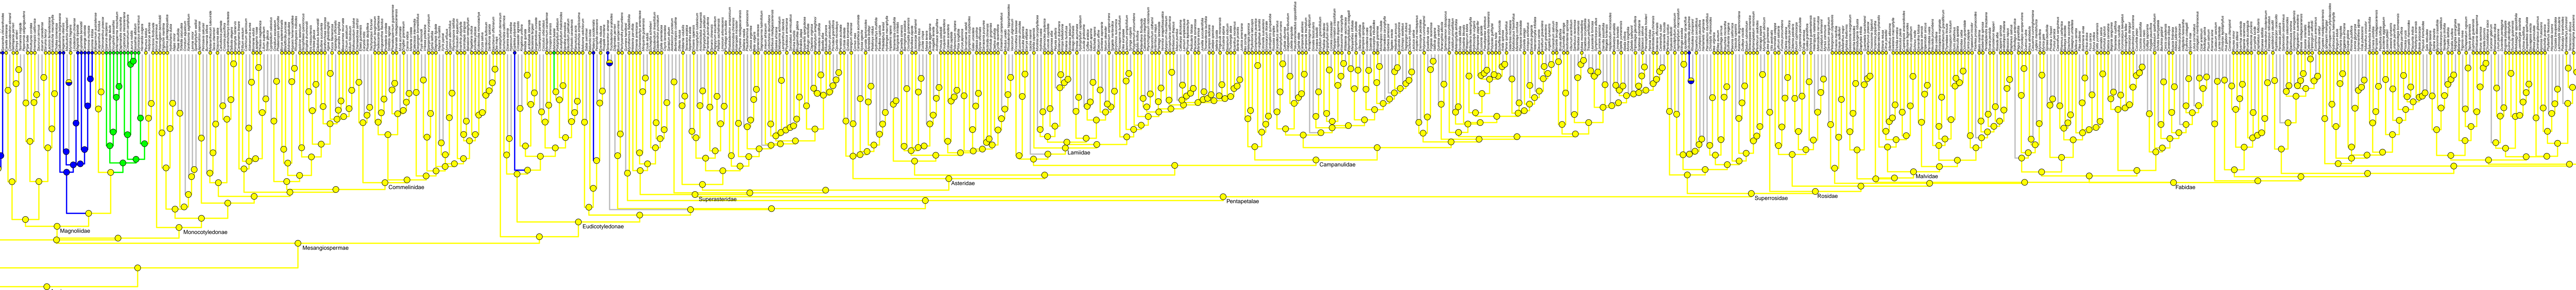

ML ancestral state reconstruction using rayDISC (R:corHMM)  
 313\_A. Anther dehiscence (3-state) (D2d), ARdeq model

● longitudinal slit  
● H-valvate  
● flap-valvate

| Node            | ML state          | Prob   |
|-----------------|-------------------|--------|
| Angiospermae    | longitudinal slit | 1      |
| Mesangiospermae | longitudinal slit | 1      |
| Magnoliidae     | longitudinal slit | 0.992  |
| Monocotyledonae | longitudinal slit | 0.9999 |
| Eudicotyledonae | longitudinal slit | 1      |
| Commelinidae    | longitudinal slit | 1      |
| Pentapetalae    | longitudinal slit | 1      |
| Superasteridae  | longitudinal slit | 1      |
| Asteridae       | longitudinal slit | 1      |
| Lamiidae        | longitudinal slit | 1      |
| Campanulidae    | longitudinal slit | 1      |
| Superosidae     | longitudinal slit | 1      |
| Rosidae         | longitudinal slit | 1      |
| Fabidae         | longitudinal slit | 1      |
| Malvidae        | longitudinal slit | 1      |
| Superasteridae  | longitudinal slit | 1      |
| Pentapetalae    | longitudinal slit | 1      |
| Eudicotyledonae | longitudinal slit | 1      |
| Magnoliidae     | longitudinal slit | 1      |
| Monocotyledonae | longitudinal slit | 1      |
| Mesangiospermae | longitudinal slit | 1      |
| Angiospermae    | longitudinal slit | 1      |

| Model | LogL   | Npar | AIC    | AICc   | BIC    | Wong       | IC  |
|-------|--------|------|--------|--------|--------|------------|-----|
| ARD   | -55.17 | 6    | 122.33 | 122.44 | 122.44 | 0.16 2e-04 | 1   |
| ARD*  | -54.09 | 6    | 120.18 | 120.29 | 120.29 | 0.42 2e-04 | 1   |
| ER    | -60.31 | 1    | 122.62 | 122.63 | 2.34   | 0.15 1e-04 | ... |
| SYM   | -59.3  | 3    | 124.61 | 124.64 | 4.35   | 0.05 2e-04 | ... |
| SYMq  | -58.21 | 3    | 122.41 | 122.44 | 2.15   | 0.16 2e-04 | ... |

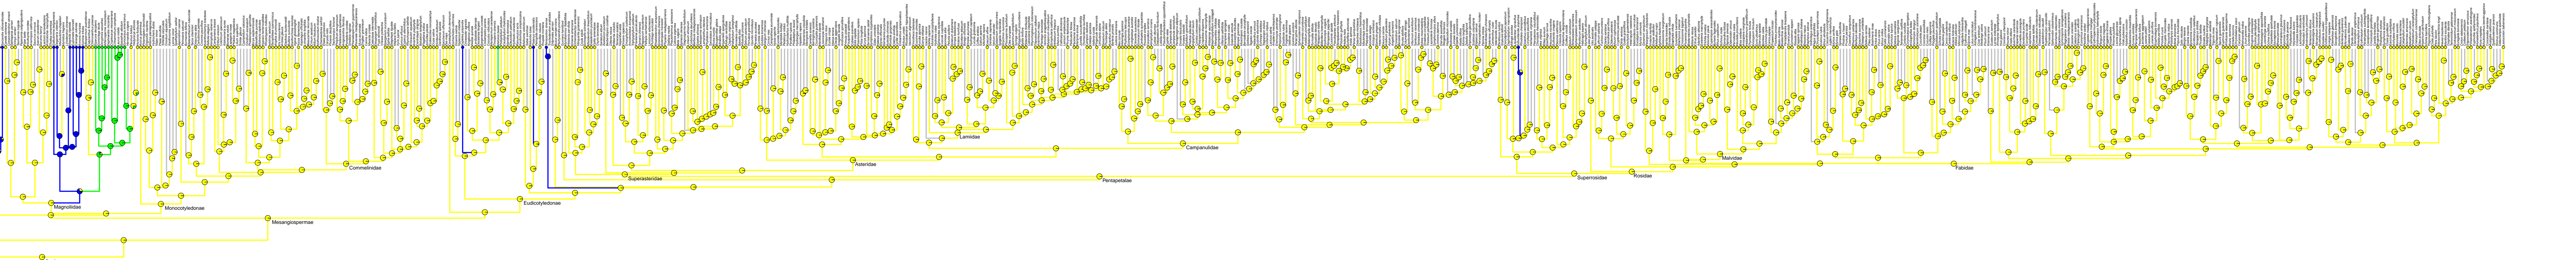

MP ancestral state reconstruction using ancestral.pars  
(R:phangorn)  
401\_B. Number of structural carpels (5-state) (D2c), 188 steps

- one (1)
- two (2)
- three (3)
- four or five (4-5)
- more than five (>5)

- |                 |                     |
|-----------------|---------------------|
| Node            | MP state(s)         |
| Angiospermae    | more than five (>5) |
| Mesangiospermae | more than five (>5) |
| Magnoliidae     | more than five (>5) |
| Monocotyledonae | three (3)           |
| Eudicotyledonae | more than five (>5) |
| Commelinidae    | three (3)           |
| Pentapetalae    | three (3)           |
| Superasteridae  | three (3)           |
| Asteridae       | four or five (4-5)  |
| Lamiidae        | two (2)             |
| Campanulidae    | two (2)             |
| Superrosidae    | three (3)           |
| Rosidae         | three (3)           |
| Malvidae        | four or five (4-5)  |
| Fabidae         | four or five (4-5)  |

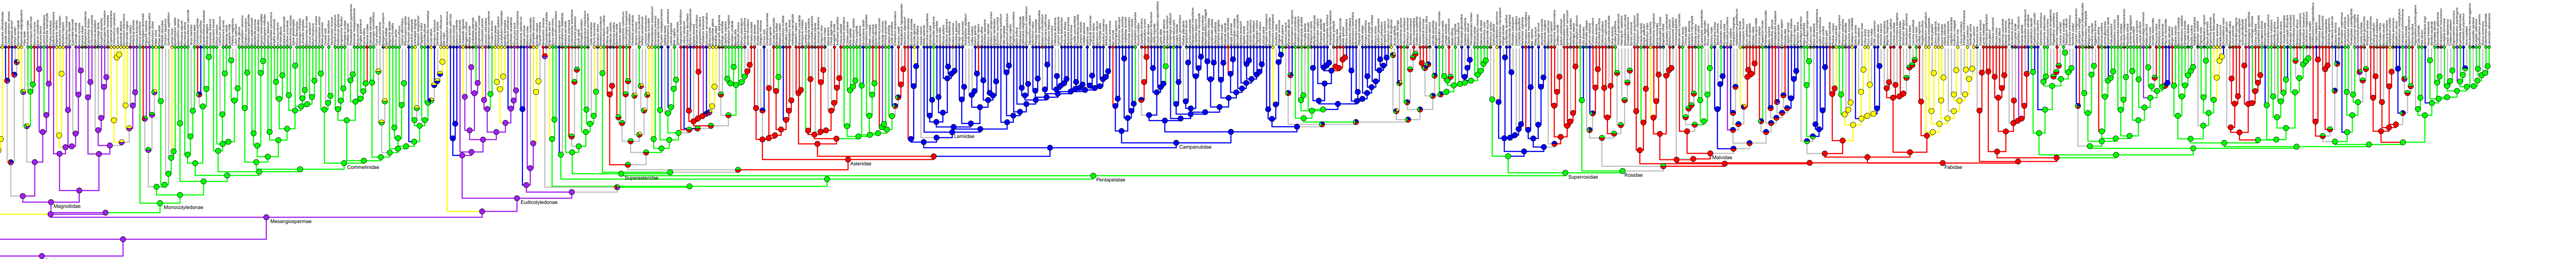

ML ancestral state reconstruction using rayDISC (R:corHMM)  
401\_B. Number of structural carpels (5–state) (D2c), ARDeq model

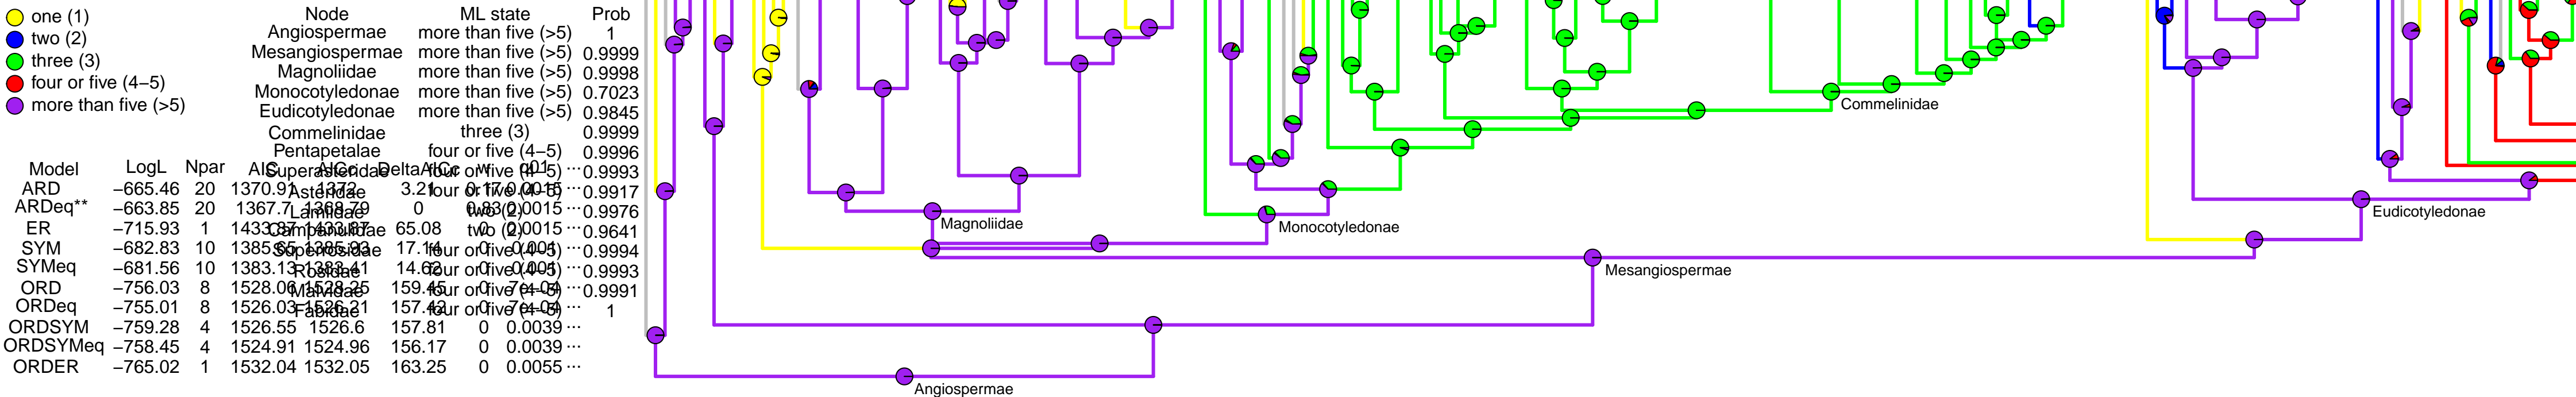

MP ancestral state reconstruction using ancestral.pars  
(R:phangorn)  
400\_A. Gynoecium phyllotaxy (D2d), 10 steps

whorled

spiral

Node

Angiospermae

Mesangiospermae

Magnoliidae

Monocotyledonae

Eudicotyledonae

Commelinidae

Pentapetalae

Superasteridae

Asteridae

Lamiidae

Campanulidae

Superrosidae

Rosidae

Malvidae

Fabidae

MP state(s)

whorled / spiral

whorled

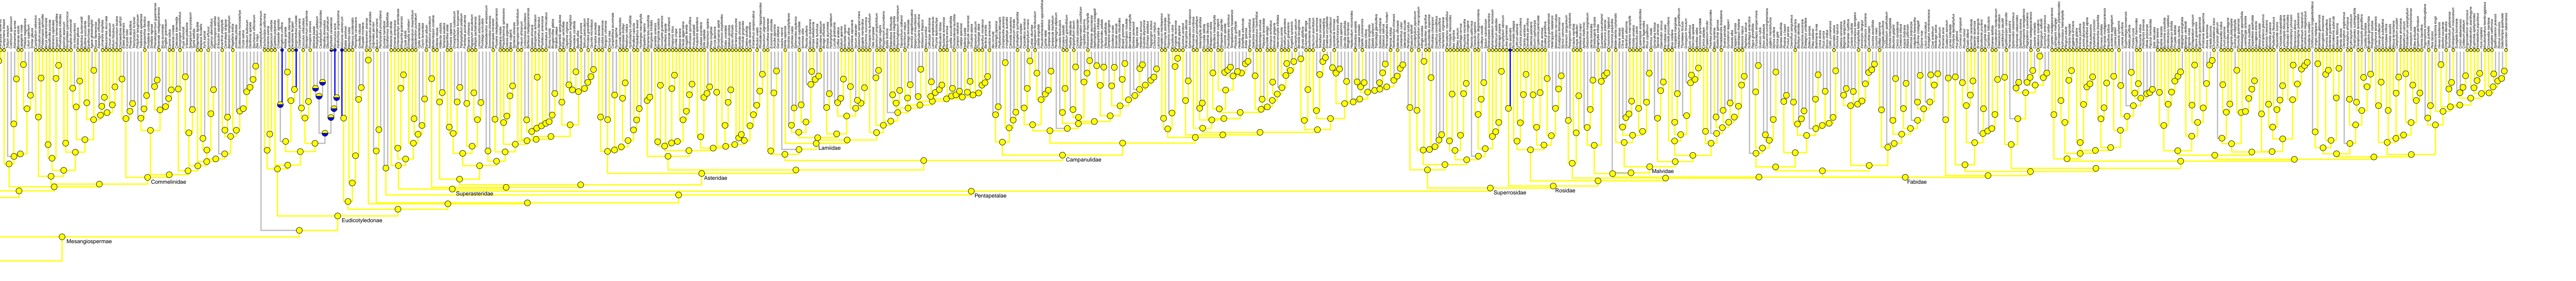





ML ancestral state reconstruction using rayDISC (R:corHMM)  
403\_A. Fusion of ovaries (binary) (D2c, ARDeq model)

● free (<5%)  
● fused (>5%)

|       | Node            | ML state    | Prob   |
|-------|-----------------|-------------|--------|
| Model | Angiospermae    | free (<5%)  | 1      |
|       | Mesangiospermae | free (<5%)  | 0.9995 |
|       | Magnoliidae     | free (<5%)  | 0.998  |
|       | Monocotyledonae | free (<5%)  | 0.8807 |
|       | Eudicotyledonae | free (<5%)  | 0.9935 |
|       | Commelinidae    | fused (>5%) | 0.9999 |
|       | Pentapetalae    | fused (>5%) | 0.9996 |
|       | Superasteridae  | fused (>5%) | 0.9999 |
|       | Asteridae       | fused (>5%) | 1      |
|       | Lamiidae        | fused (>5%) | 1      |
| ARD   | Campanulidae    | fused (>5%) | 1      |
|       | Superasteridae  | fused (>5%) | 1      |
|       | Asteridae       | fused (>5%) | 1      |
|       | Lamiidae        | fused (>5%) | 1      |
|       | Campanulidae    | fused (>5%) | 1      |
|       | Superasteridae  | fused (>5%) | 1      |
|       | Asteridae       | fused (>5%) | 1      |
|       | Lamiidae        | fused (>5%) | 1      |
|       | Campanulidae    | fused (>5%) | 1      |
|       | Superasteridae  | fused (>5%) | 1      |
| ER    | Angiospermae    | free (<5%)  | 0.9995 |
|       | Mesangiospermae | free (<5%)  | 0.998  |
|       | Magnoliidae     | free (<5%)  | 0.8807 |
|       | Monocotyledonae | free (<5%)  | 0.9935 |
|       | Eudicotyledonae | free (<5%)  | 0.9999 |
|       | Commelinidae    | fused (>5%) | 0.9996 |
|       | Pentapetalae    | fused (>5%) | 0.9999 |
|       | Superasteridae  | fused (>5%) | 1      |
|       | Asteridae       | fused (>5%) | 1      |
|       | Lamiidae        | fused (>5%) | 1      |
| UNI01 | Angiospermae    | free (<5%)  | 0.9995 |
|       | Mesangiospermae | free (<5%)  | 0.998  |
|       | Magnoliidae     | free (<5%)  | 0.8807 |
|       | Monocotyledonae | free (<5%)  | 0.9935 |
|       | Eudicotyledonae | free (<5%)  | 0.9999 |
|       | Commelinidae    | fused (>5%) | 0.9996 |
|       | Pentapetalae    | fused (>5%) | 0.9999 |
|       | Superasteridae  | fused (>5%) | 1      |
|       | Asteridae       | fused (>5%) | 1      |
|       | Lamiidae        | fused (>5%) | 1      |
| UNI10 | Angiospermae    | free (<5%)  | 0.9995 |
|       | Mesangiospermae | free (<5%)  | 0.998  |
|       | Magnoliidae     | free (<5%)  | 0.8807 |
|       | Monocotyledonae | free (<5%)  | 0.9935 |
|       | Eudicotyledonae | free (<5%)  | 0.9999 |
|       | Commelinidae    | fused (>5%) | 0.9996 |
|       | Pentapetalae    | fused (>5%) | 0.9999 |
|       | Superasteridae  | fused (>5%) | 1      |
|       | Asteridae       | fused (>5%) | 1      |
|       | Lamiidae        | fused (>5%) | 1      |

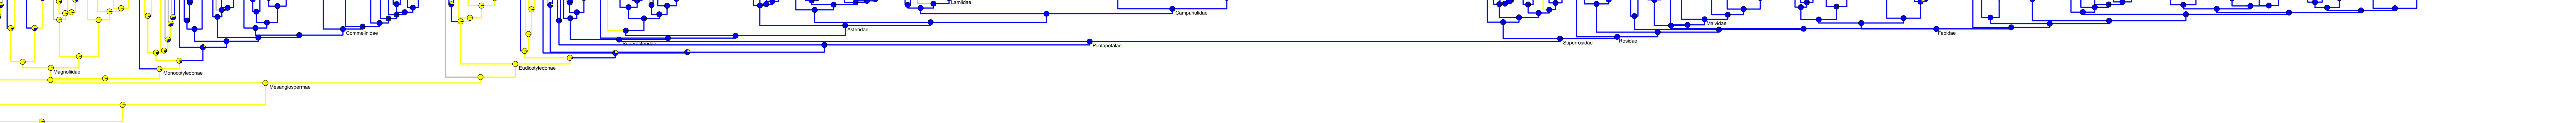



ML ancestral state reconstruction using rayDISC (R:corHMM)  
411\_A. Number of ovules per functional carpel (3–state) (D2c), ARDeq model

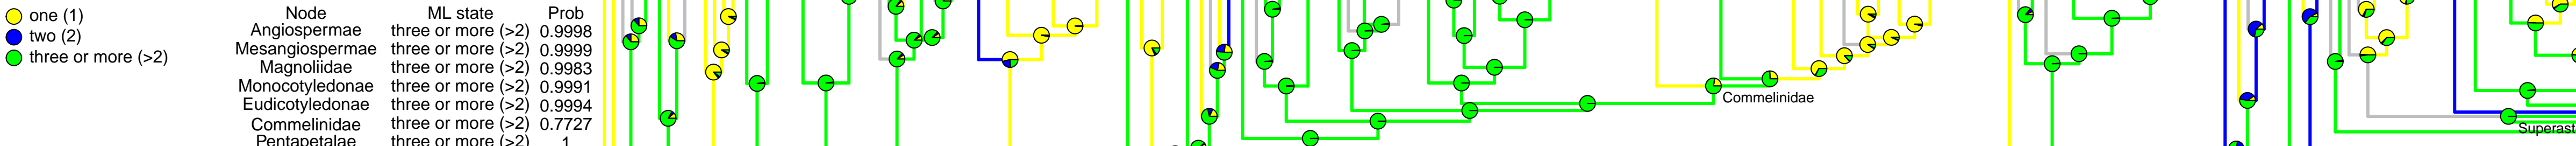

| Model    | LogL    | Npar   | AICc   | Order Data               | Alc Order Data | For more (>2) | p-value    |
|----------|---------|--------|--------|--------------------------|----------------|---------------|------------|
| -389.27  | 6       | 790.54 | 790.66 | 1.91 three or more (>2)  | 0.0003 (<2)    | 0.9985        |            |
| ARD      | -388.32 | 6      | 788.63 | 1.91 three or more (>2)  | 0.0003 (<2)    | 0.9968        |            |
| ARDeq**  | -388.32 | 6      | 788.63 | 1.91 three or more (>2)  | 0.0003 (<2)    | 0.9999        |            |
| ER       | -400.17 | 1      | 802.33 | 3.6 three or more (>2)   | 0.0027 (<2)    | 0.9924        |            |
| SYM      | -399.58 | 3      | 805.13 | 6.46 three or more (>2)  | 0.0027 (<2)    | 1             |            |
| SYMeq    | -398.85 | 3      | 803.69 | 6.46 three or more (>2)  | 0.0027 (<2)    | 0.9999        |            |
| ORD      | -397.11 | 4      | 802.22 | 13.53 three or more (>2) | 0.0027 (<2)    | 0.9995        |            |
| ORDeq    | -400.66 | 4      | 809.32 | 20.63 three or more (>2) | 0.0027 (<2)    | 1             |            |
| ORDSYM   | -410.87 | 2      | 825.75 | 825.76                   | 37.02          | 0             | 0.0052 ... |
| ORDSYMeq | -410.62 | 2      | 825.24 | 825.26                   | 36.52          | 0             | 0.0052 ... |
| ORDER    | -411.98 | 1      | 825.95 | 825.96                   | 37.22          | 0             | 0.006 ...  |

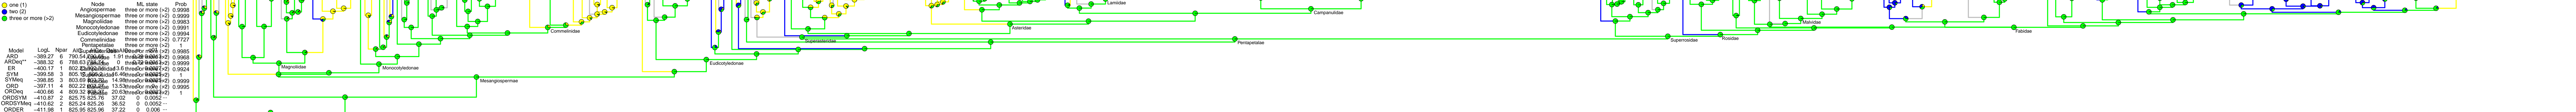

Supplement: Supplementary Data 20 [file ncomms16047-s21.pdf]
