# Supplementary material for: The ancestral flower of angiosperms and its early diversification
Source: Nat Commun. 2017 Aug 1;8:16047. doi: 10.1038/ncomms16047 (PMC5543309; doi:10.1038/ncomms16047)

00\_A. Functional sex of flowers (D2d), ARDeq model

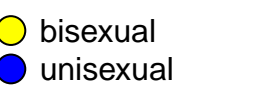

| Node           | ML state | Prob   |
|----------------|----------|--------|
| Angiospermae   | bisexual | 0.9999 |
| Angiospermae   | bisexual | 1      |
| Magnoliidae    | bisexual | 1      |
| Mecotyledonae  | bisexual | 1      |
| Mecotyledonae  | bisexual | 1      |
| Mecotyledonae  | bisexual | 0.9998 |
| Commelinidae   | bisexual | 1      |
| Pentapetalae   | bisexual | 1      |
| Superasteridae | bisexual | 1      |
| Asteridae      | bisexual | 1      |
| Lamiidae       | bisexual | 1      |
| Campanulidae   | bisexual | 0.9995 |
| Superrosidae   | bisexual | 1      |

| Model  | LogL    | Npar | AIC    | AICc   | DeltaAICc | Wsex   | 90% CI | 95% CI |
|--------|---------|------|--------|--------|-----------|--------|--------|--------|
| ARD    | -314.26 | 2    | 632.51 | 632.55 | 0         | 0.9997 | 0.9997 | 1.0000 |
| ARDeq* | -313.64 | 2    | 631.28 | 631.3  | 0         | 0.47   | 0.0028 | 0.0028 |
| ER     | -316.61 | 1    | 635.21 | 635.22 | 3.92      | 0.07   | 0.0027 | 0.0027 |
| UNI01  | -315.43 | 1    | 632.86 | 632.86 | 1.57      | 0.21   | 0.0029 |        |
| UNI10  | -361.08 | 1    | 724.16 | 724.16 | 92.87     | 0      |        | 0.011  |

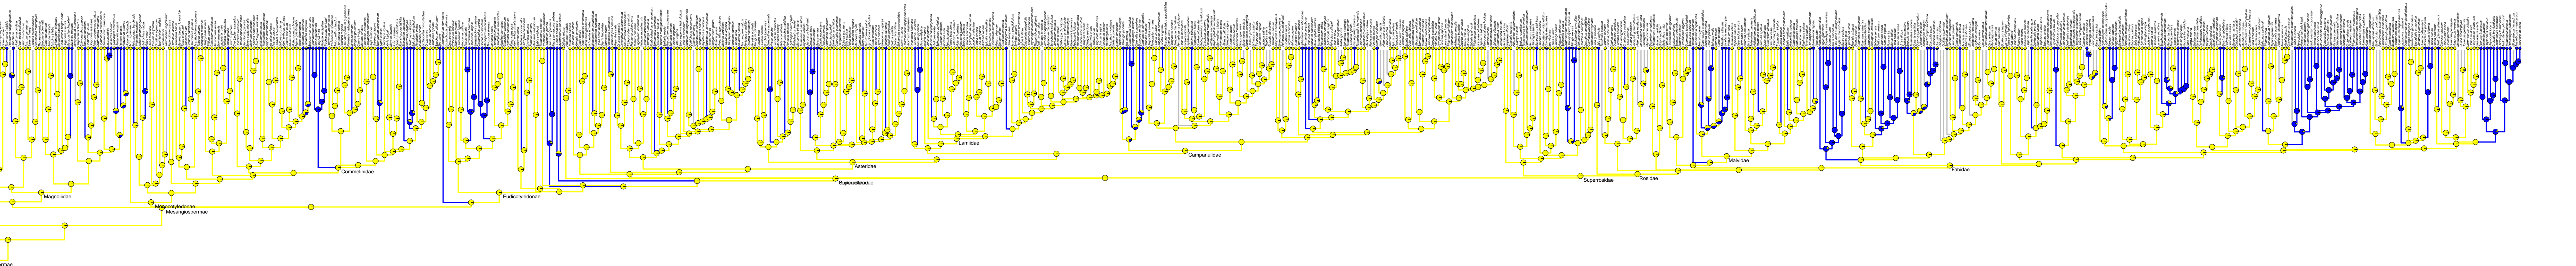





ancestral state reconstruction using ancestral.pars  
(phangorn)

2\_B. Ovary position (binary) (D2d), 81 steps

|          | Node            | MP state(s)         |
|----------|-----------------|---------------------|
| superior | Angiospermae    | superior            |
| inferior | Mesangiospermae | superior            |
|          | Magnoliidae     | superior            |
|          | Monocotyledonae | superior            |
|          | Eudicotyledonae | superior            |
|          | Commelinidae    | superior            |
|          | Pentapetalae    | superior            |
|          | Superasteridae  | superior            |
|          | Asteridae       | superior            |
|          | Lamiidae        | superior            |
|          | Campanulidae    | superior / inferior |
|          | Superrosidae    | superior / inferior |
|          | Rosidae         | superior / inferior |
|          | Malvidae        | superior            |
|          | Fabidae         | superior            |

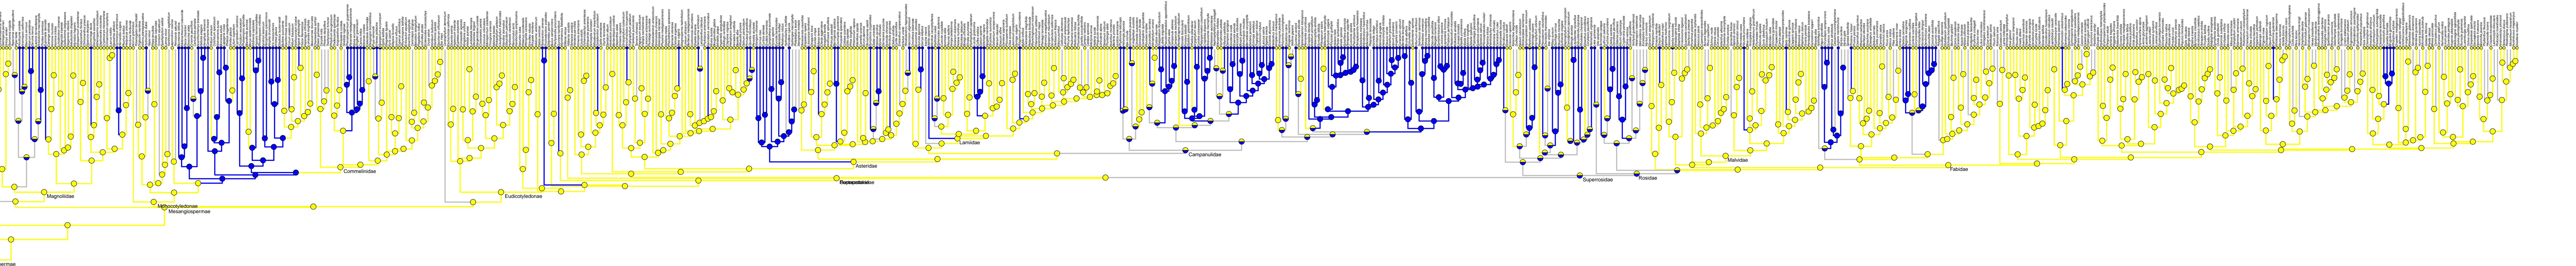

02\_B. Ovary position (binary) (D2d), ARDeq model

| Model   | LogL    | Npar | AIC    | AICc   | RAICc | superDP | p.9/24 |
|---------|---------|------|--------|--------|-------|---------|--------|
| ARD     | -271.79 | 2    | 547.58 | 547.58 | 14    | 0.9     | 0.0037 |
| ARDeq** | -271.22 | 2    | 546.44 | 546.46 | 0     | 0.53    | 0.0019 |
| ER      | -273.41 | 1    | 548.82 | 548.83 | 2.37  | 0.16    | 0.0023 |
| UNI01   | -285.14 | 1    | 572.28 | 572.28 | 25.83 | 0       | 0.0026 |
| UNI10   | -295.89 | 1    | 593.77 | 593.78 | 47.32 | 0       | 0.0093 |

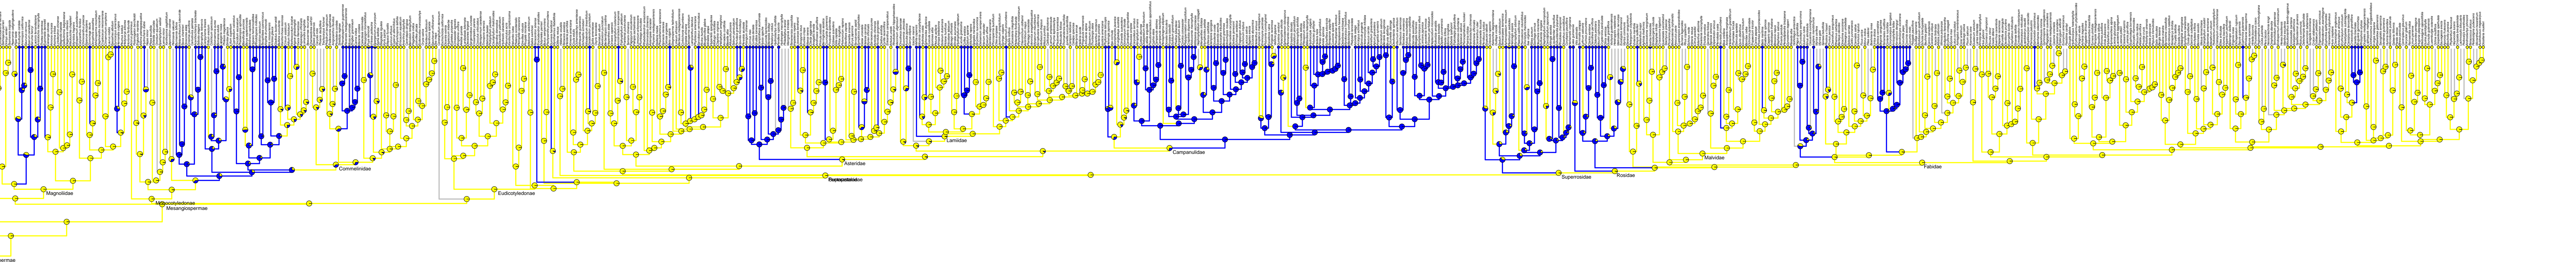













80 A. Perianth phyllotaxy (binary) (D2d). 16 steps

● whorled      Node      MP state(s)  
● spiral      Angiospermae      whorled / spiral

Phylogenetic tree of angiosperms showing relationships between various families. The tree is rooted on the left and branches out to the right. Families listed on the left include Mesangiospermae, Magnoliidae, Monocotyledonae, Eudicotyledonae, Commelinidae, Pentapetalae, Superasteridae, Asteridae, Lamiidae, Campanulidae, Superrosidae, Rosidae, Malvidae, and Fabidae. The tree shows a clear division between Magnoliidae and the rest of the angiosperms, with the latter further divided into Monocotyledonae and Eudicotyledonae. The Eudicotyledonae clade includes Commelinidae, Pentapetalae, Superasteridae, Asteridae, Lamiidae, Campanulidae, Superrosidae, Rosidae, Malvidae, and Fabidae. The tree is color-coded with yellow and blue lines.

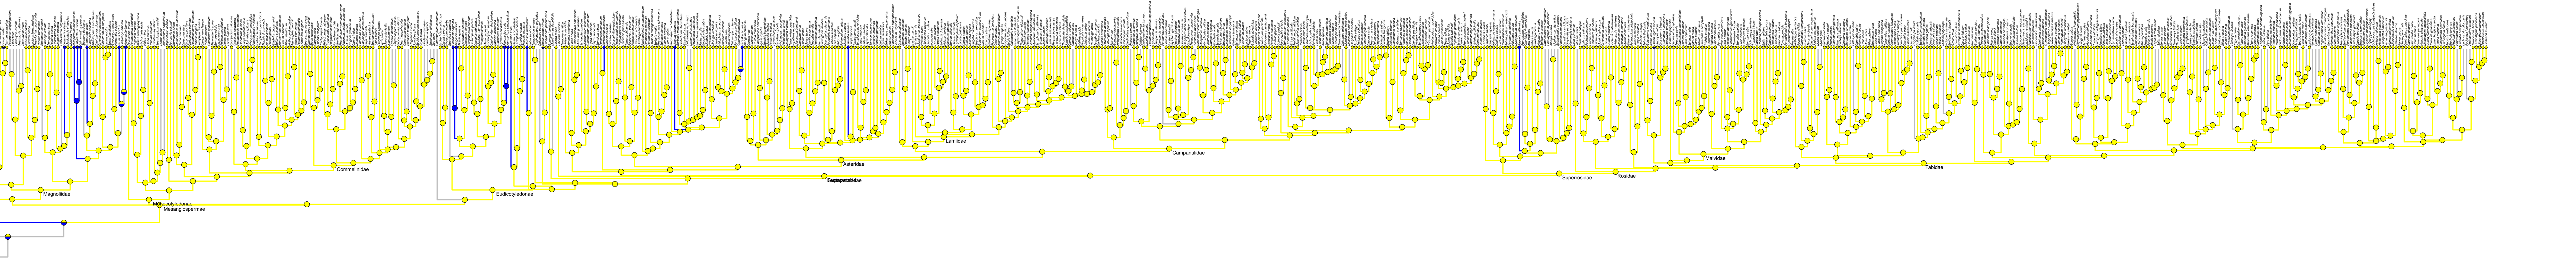

30\_A. Perianth phyllotaxy (binary) (D2d, ARDeq model)

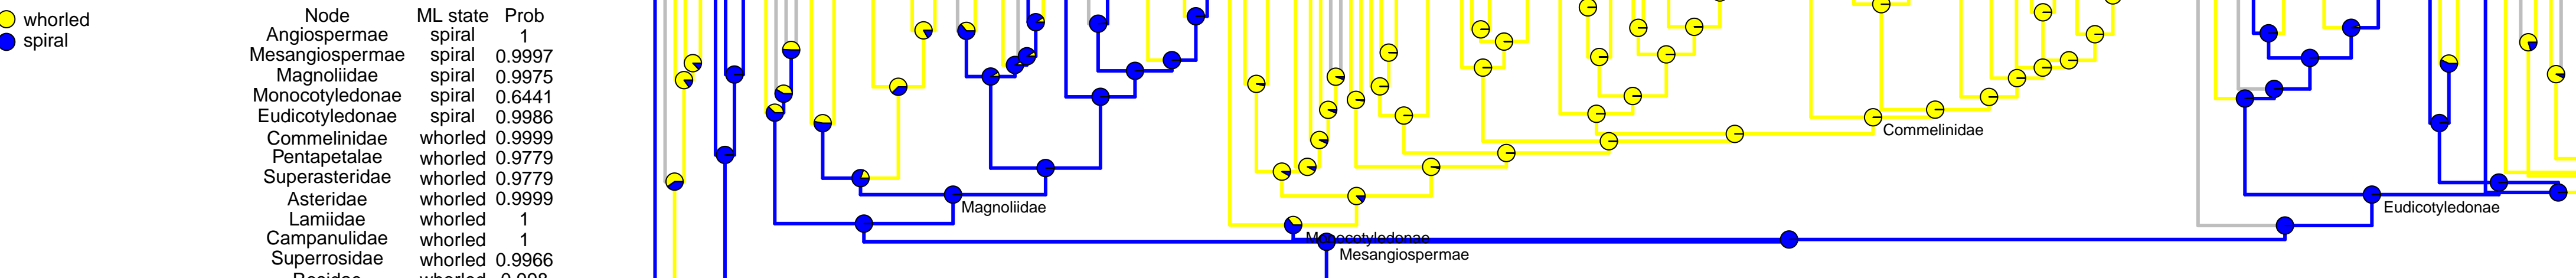

| Model   | LogL   | Npar | AIC    | AICc   | R <sup>2</sup> Obs | Wholed | Wholed | Wholed |
|---------|--------|------|--------|--------|--------------------|--------|--------|--------|
| ARD     | -70.42 | 2    | 144.85 | 144.85 | 0.38               | 0.0092 | 0.0092 | 0.0092 |
| ARDeq** | -69.73 | 2    | 143.46 | 143.48 | 0                  | 0.0092 | 0.0092 | 0.0092 |
| ER      | -76.67 | 1    | 155.35 | 155.36 | 11.88              | 0      | 4e-04  | 4e-04  |
| UNI01   | -77.07 | 1    | 156.15 | 156.15 | 12.67              | 0      | 4e-04  | 4e-04  |
| UNI10   | -80.22 | 1    | 162.44 | 162.44 | 18.96              | 0      | 0.0161 | 0.0161 |

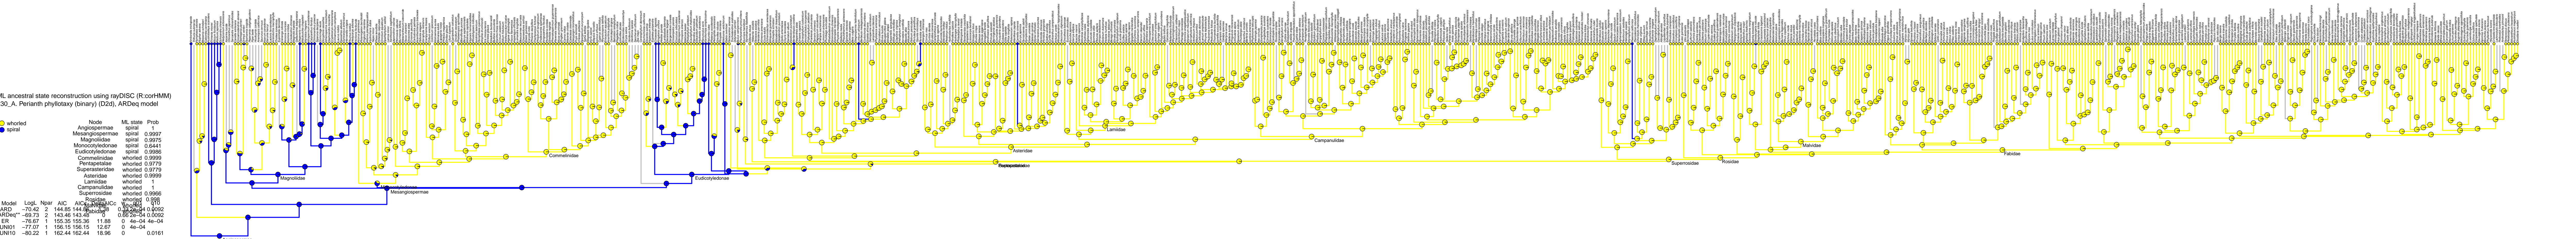



ML ancestral state reconstruction using rayDISC (R:corHMM)  
231\_A. Number of perianth whorls (D2c), ARDeq model

● one (1)  
● two (2)  
● more than two (>2)

| Model    | LogL    | Npar | AIC    | AICc   | DeltaAICc | w    | 95% CI     |
|----------|---------|------|--------|--------|-----------|------|------------|
| ARD      | -268.31 | 6    | 548.61 | 548.61 | 2.17      | 0.26 | 0.065 ...  |
| ARD**    | -267.22 | 6    | 546.44 | 546.44 | 0         | 0.74 | 0.065 ...  |
| ER       | -308.97 | 1    | 619.98 | 619.98 | 71.37     | 0.00 | 0.001 ...  |
| SYM      | -291.07 | 3    | 588.13 | 588.13 | 41.62     | 0.00 | 0.001 ...  |
| SYMeq    | -290.62 | 3    | 587.24 | 587.24 | 40.72     | 0.00 | 0.001 ...  |
| ORD      | -274.98 | 4    | 557.96 | 557.96 | 11.46     | 0.00 | 0.004 ...  |
| ORDeq    | -273.88 | 4    | 555.77 | 555.82 | 9.27      | 0.01 | 0.003 ...  |
| ORDSYM   | -297.42 | 2    | 598.83 | 598.85 | 52.3      | 0    | 0.0018 ... |
| ORDSYMeq | -296.69 | 2    | 597.39 | 597.4  | 50.86     | 0    | 0.0018 ... |
| ORDER    | -312.18 | 1    | 626.36 | 626.36 | 79.82     | 0    | 0.0011 ... |

| Node            | ML state           | Prob   |
|-----------------|--------------------|--------|
| Angiospermae    | more than two (>2) | 1      |
| Mesangiospermae | more than two (>2) | 0.9995 |
| Magnoliidae     | more than two (>2) | 1      |
| Monocotyledonae | two (2)            | 0.4988 |
| Eudicotyledonae | more than two (>2) | 0.9846 |
| Commelinidae    | two (2)            | 1      |
| Pentapetalae    | two (2)            | 0.9992 |
| Superasteridae  | two (2)            | 0.9992 |
| Superrosidae    | two (2)            | 0.9998 |
| Supermalvaceae  | two (2)            | 0.9999 |

| Model    | LogL    | Npar | AIC    | AICc   | DeltaAICc | w    | 95% CI     |
|----------|---------|------|--------|--------|-----------|------|------------|
| ARD      | -268.31 | 6    | 548.61 | 548.61 | 2.17      | 0.26 | 0.065 ...  |
| ARD**    | -267.22 | 6    | 546.44 | 546.44 | 0         | 0.74 | 0.065 ...  |
| ER       | -308.97 | 1    | 619.98 | 619.98 | 71.37     | 0.00 | 0.001 ...  |
| SYM      | -291.07 | 3    | 588.13 | 588.13 | 41.62     | 0.00 | 0.001 ...  |
| SYMeq    | -290.62 | 3    | 587.24 | 587.24 | 40.72     | 0.00 | 0.001 ...  |
| ORD      | -274.98 | 4    | 557.96 | 557.96 | 11.46     | 0.00 | 0.004 ...  |
| ORDeq    | -273.88 | 4    | 555.77 | 555.82 | 9.27      | 0.01 | 0.003 ...  |
| ORDSYM   | -297.42 | 2    | 598.83 | 598.85 | 52.3      | 0    | 0.0018 ... |
| ORDSYMeq | -296.69 | 2    | 597.39 | 597.4  | 50.86     | 0    | 0.0018 ... |
| ORDER    | -312.18 | 1    | 626.36 | 626.36 | 79.82     | 0    | 0.0011 ... |

Angiospermae

Mesangiospermae

Monocotyledonae

Eudicotyledonae

Commelinidae

Pentapetalae

Superasteridae

Superrosidae

Supermalvaceae

Malvaceae

Rosidae

Fabidae

Campanulidae

Asteridae

Lamiidae



ML ancestral state reconstruction using rayDISC (R:corHMM)  
232\_A. Perianth merism (4-state) (D2c), SYMeq model

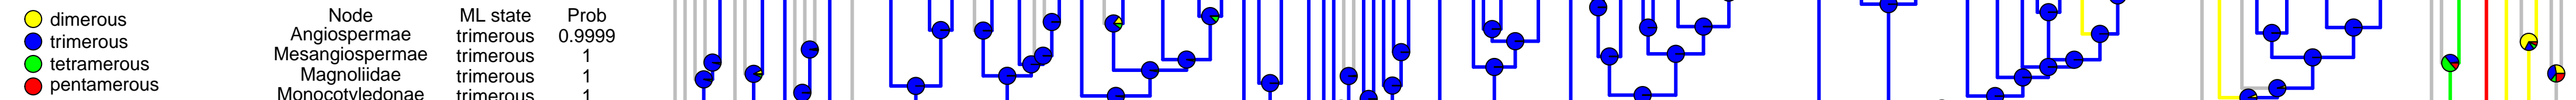

| Model    | LogL    | Npar | AIC    | Cup    | AIC   | DeltaAIC | penalty | mer | ord | 0.999 |
|----------|---------|------|--------|--------|-------|----------|---------|-----|-----|-------|
| ARD      | -320.01 | 12   | 664.02 | 681.84 | 5.05  | 0.081    | 1       | 1   | 1   | 1     |
| ARDeq    | -318.98 | 12   | 661.97 | 681.84 | 3     | 0.004    | 1       | 1   | 1   | 1     |
| ER       | -359.78 | 1    | 721.56 | 681.84 | 62.2  | 0.004    | 1       | 1   | 1   | 1     |
| SYM      | -324.89 | 6    | 661.78 | 681.84 | 2.51  | 0.011    | 1       | 1   | 1   | 1     |
| SYMeq**  | -323.63 | 6    | 659.26 | 681.84 | 0     | 0.011    | 1       | 1   | 1   | 1     |
| ORD      | -334.77 | 6    | 681.55 | 681.84 | 22.25 | 0.004    | 1       | 1   | 1   | 1     |
| ORDeq    | -334.31 | 6    | 680.62 | 681.84 | 21.36 | 0        | 1       | 1   | 1   | 1     |
| ORDSYM   | -342.93 | 3    | 691.86 | 691.89 | 32.52 | 0        | 0.0018  | ... | ... | ...   |
| ORDSYMeq | -341.81 | 3    | 689.61 | 689.64 | 30.27 | 0        | 0.0018  | ... | ... | ...   |
| ORDER    | -344.71 | 1    | 691.41 | 691.42 | 32.05 | 0        | 0.0023  | ... | ... | ...   |

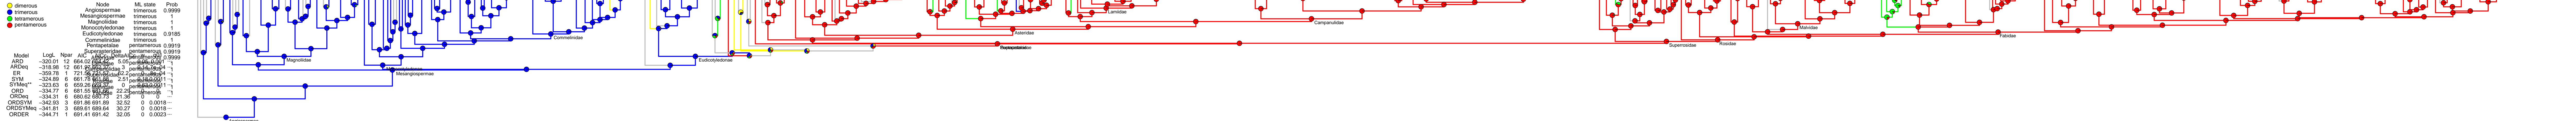

ancestral state reconstruction using ancestral.pars  
(phangorn)

2\_B. Perianth merism (3-state) (D2c), 70 steps

Node MP state(s)

Angiospermae trimerous

Mesangiospermae trimerous

Magnoliidae trimerous

Monocotyledonae trimerous

Eudicotyledonae trimerous

Comelinidae trimerous

Pentapetalae pentamerous

Superasteridae pentamerous

Asterales pentamerous

Lamiales pentamerous

Campanulidae pentamerous

Superrosidae pentamerous

Rosidae pentamerous

Malvidae pentamerous

Fabidae pentamerous

Magnoliidae

Monocotyledonae

Mesangiospermae

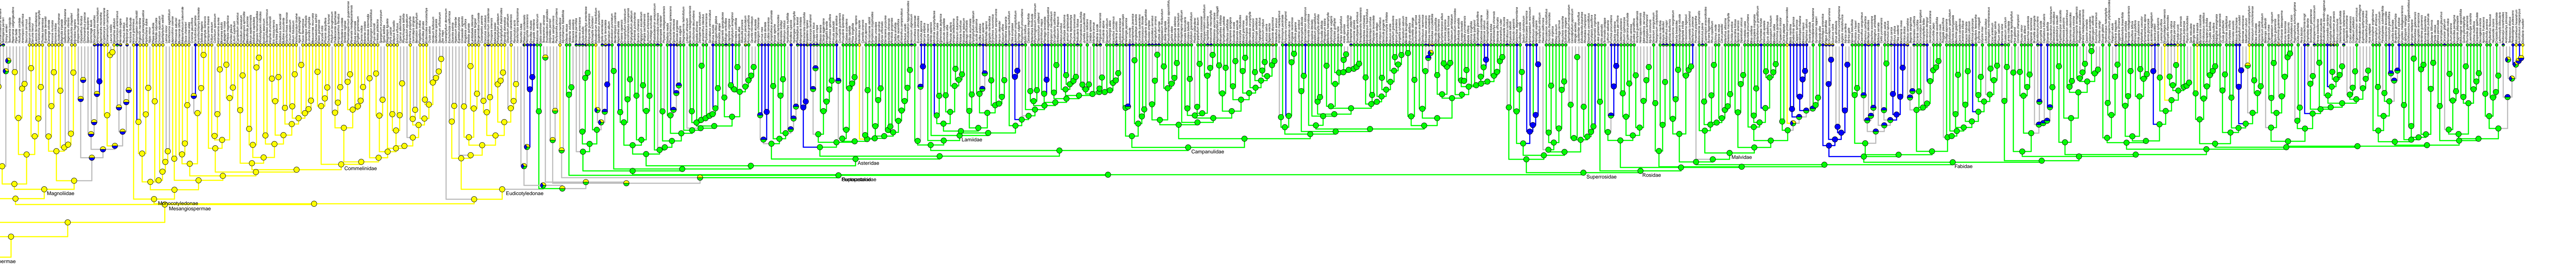

ML ancestral state reconstruction using rayDISC (R:corHMM)  
 232\_B. Perianth merism (3-state) (D2c), SYMeq model

● trimerous  
● tetramerous  
● pentamerous

|  | Node            | ML state    | Prob   |
|--|-----------------|-------------|--------|
|  | Angiospermae    | trimerous   | 1      |
|  | Mesangiospermae | trimerous   | 1      |
|  | Magnoliidae     | trimerous   | 1      |
|  | Monocotyledonae | trimerous   | 1      |
|  | Eudicotyledonae | trimerous   | 0.9492 |
|  | Commelinidae    | trimerous   | 1      |
|  | Pentapetalae    | pentamerous | 0.9966 |
|  | Superasteridae  | pentamerous | 0.9966 |
|  | Asplundae       | pentamerous | 0.9999 |

| Model    | LogL    | Npar | AIC    | ΔAIC   | ΔBIC  | ΔAIC <sub>0.95</sub> | ΔBIC <sub>0.95</sub> |
|----------|---------|------|--------|--------|-------|----------------------|----------------------|
| ARD      | -254.79 | 6    | 521.58 | 5.12   | 5.12  | 0.9999               | 0.9999               |
| ARDeq    | -253.96 | 6    | 519.92 | 3.46   | 4.46  | 0.9999               | 0.9999               |
| ER       | -280.85 | 1    | 563.79 | 42.21  | 42.21 | 0.9999               | 0.9999               |
| SYM      | -256.29 | 3    | 518.59 | 2.05   | 2.05  | 0.9999               | 0.9999               |
| SYMeq*   | -255.27 | 3    | 516.54 | 0      | 0     | 0.9999               | 0.9999               |
| ORD      | -255.18 | 4    | 518.36 | 1.84   | 1.84  | 0.9999               | 0.9999               |
| ORDeq    | -254.33 | 4    | 516.65 | 0.13   | 0.13  | 0.9999               | 0.9999               |
| ORDSYM   | -258.55 | 2    | 521.11 | 521.12 | 4.55  | 0.03                 | 0.0014               |
| ORDSYMeq | -257.56 | 2    | 519.12 | 519.14 | 2.57  | 0.08                 | 0.0014               |
| ORDER    | -261.27 | 1    | 524.54 | 524.55 | 7.98  | 0.01                 | 0.0023               |

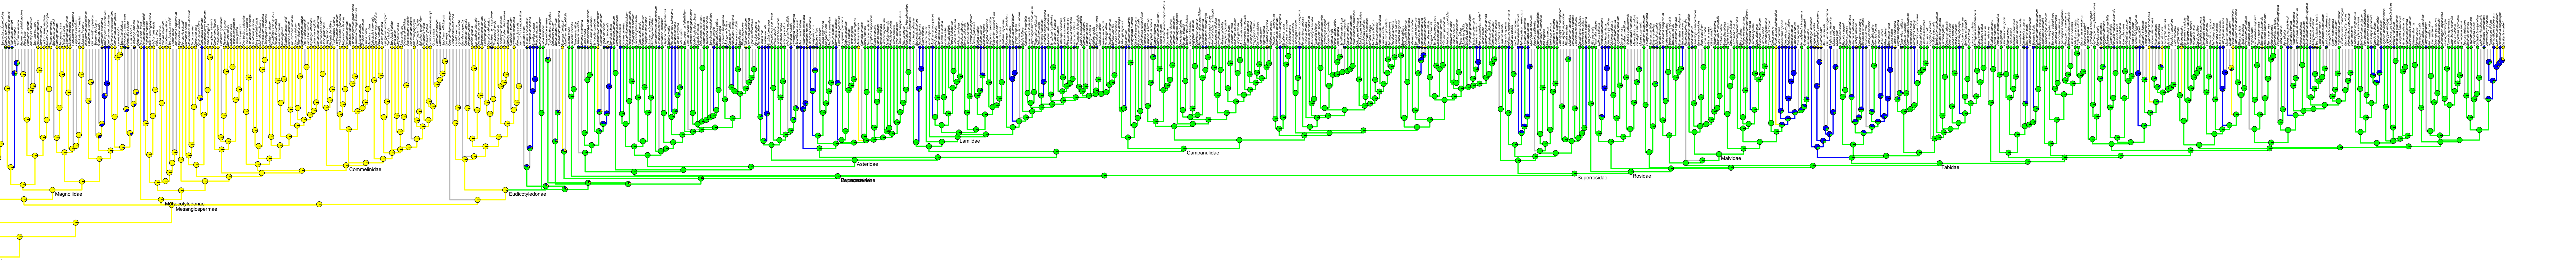



ML ancestral state reconstruction using rayDISC (R:corHMM)  
234\_A. Perianth differentiation (binary) (D2d), ARDeq model

● undifferentiated  
● differentiated

| Node            | ML state         | Prob   |
|-----------------|------------------|--------|
| Angiospermae    | undifferentiated | 1      |
| Mesangiospermae | undifferentiated | 1      |
| Magnoliidae     | undifferentiated | 0.9992 |
| Monocotyledonae | undifferentiated | 0.9999 |
| Eudicotyledonae | undifferentiated | 0.978  |
| Commelinidae    | undifferentiated | 0.9998 |
| Pentapetalae    | differentiated   | 0.9441 |
| Superasteridae  | differentiated   | 0.9441 |
| Asteridae       | differentiated   | 0.999  |
| Lamiidae        | differentiated   | 0.9999 |
| Campanulidae    | differentiated   | 1      |
| Superrosidae    | differentiated   | 0.9949 |

| Model | LogL    | Npar | AIC    | AICc   | AICw   | AICd   |
|-------|---------|------|--------|--------|--------|--------|
| ARD   | -199.02 | 2    | 402.04 | 402.04 | 0.0000 | 0.0000 |
| ARD** | -198.37 | 2    | 400.74 | 400.75 | 0.0000 | 0.0000 |
| ER    | -207.02 | 1    | 416.04 | 416.05 | 15.29  | 0.0024 |
| UNI01 | -231.24 | 1    | 464.48 | 464.48 | 63.73  | 0.0082 |
| UNI10 | -231.65 | 1    | 465.3  | 465.3  | 64.55  | 0.0032 |

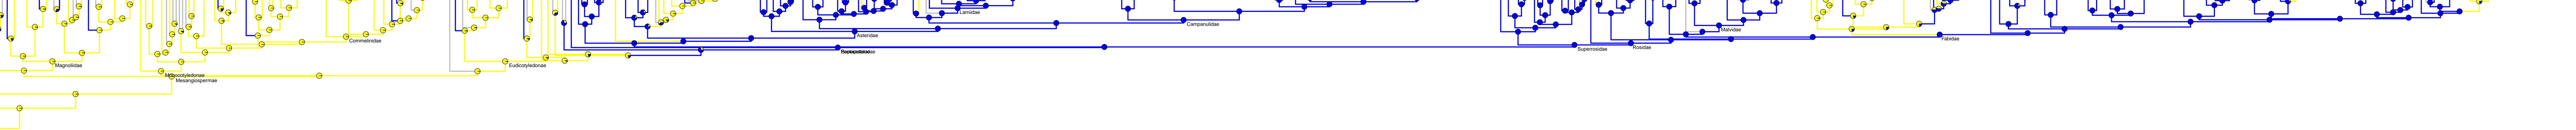

MP ancestral state reconstruction using ancestral.pars  
(R:phangorn)  
204\_A. Fusion of perianth (D2c), 78 steps

- free (<5%)

● fused (>5%)

Node

Angiospermae

Mesangiospermae

Magnoliidae

Monocotyledonae

Eudicotyledonae

Commelinidae

Pentapetalae

Superasteridae

Asteridae

Lamiidae

Campanulidae

Superrosidae

Rosidae

Malvidae

Fabidae
- MP state(s)

free (<5%)

free (<5%)

free (<5%)

free (<5%)

free (<5%)

free (<5%)

free (<5%) / fused (>5%)

free (<5%) / fused (>5%)

free (<5%)

free (<5%) / fused (>5%)

free (<5%)

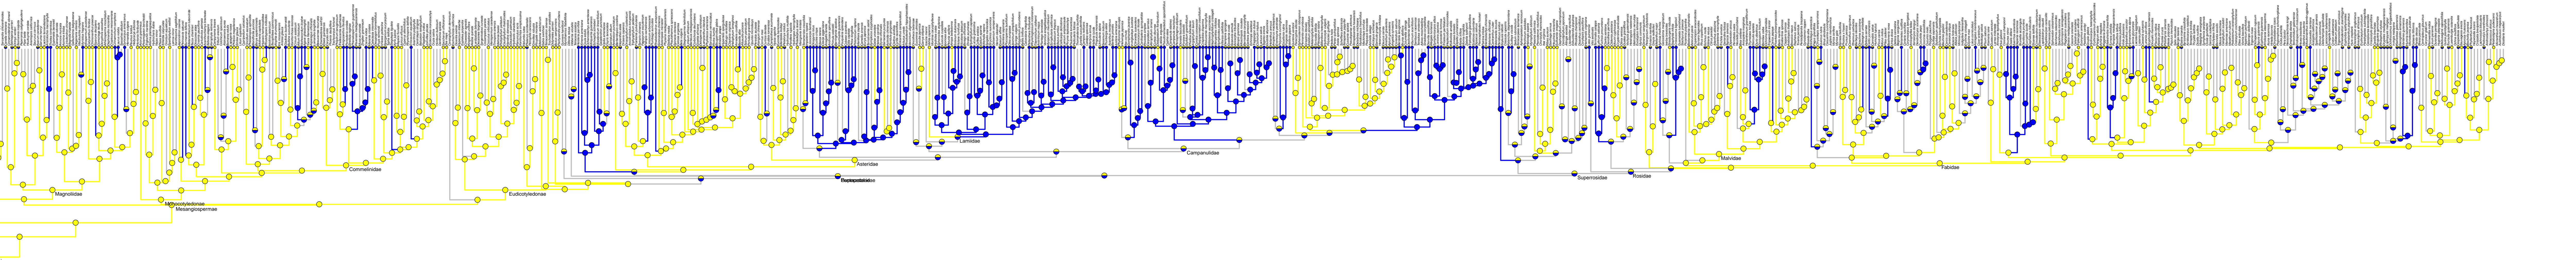

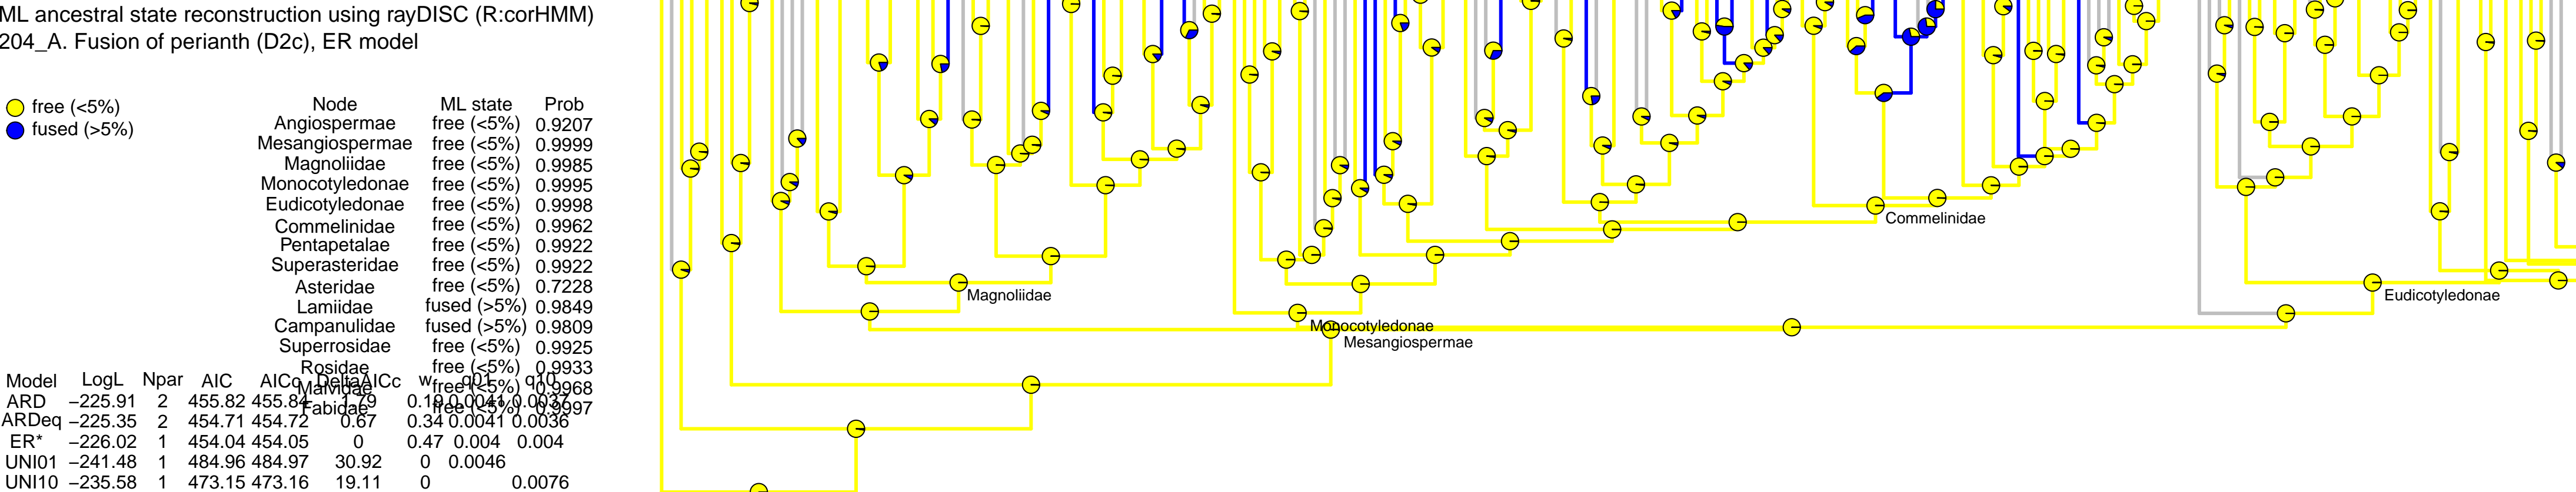

MP ancestral state reconstruction using ancestral.pars  
(R:phangorn)  
207\_A. Symmetry of perianth (binary) (D2d), 55 steps

- actinomorphic

● zygomorphic

Node

Angiospermae

Mesangiospermae

Magnoliidae

Monocotyledonae

Eudicotyledonae

Commelinidae

Pentapetalae

Superasteridae

Asteridae

Lamiidae

Campanulidae

Superrosidae

Rosidae

Malvidae

Fabidae

MP state(s)

actinomorphic

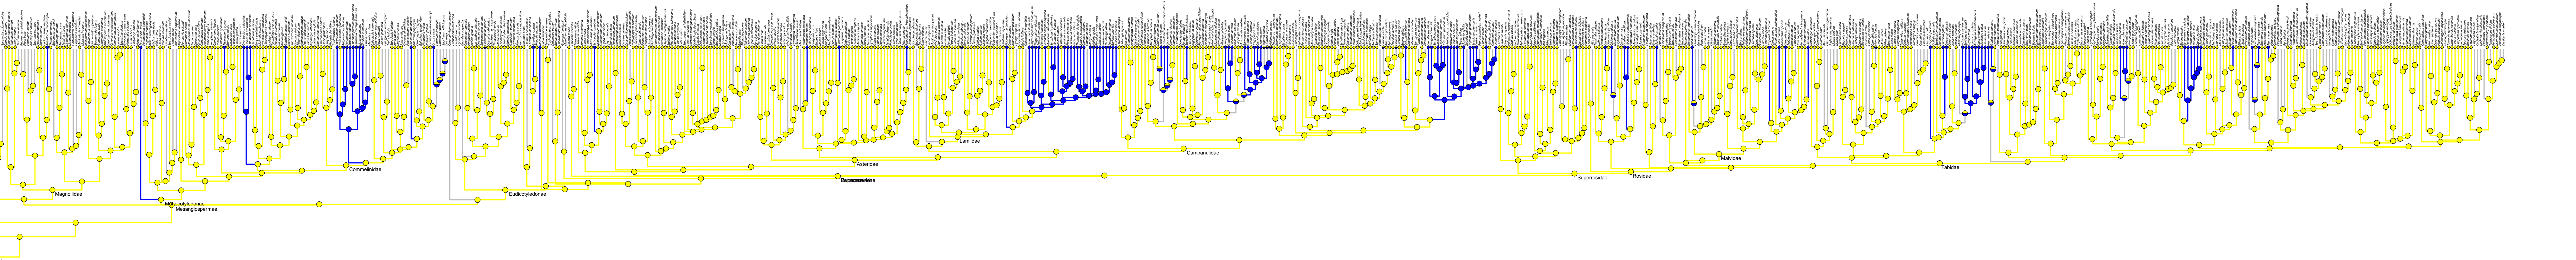





ML ancestral state reconstruction using rayDISC (R:corHMM)  
301\_B. Number of fertile stamens (3–state) (D2c), ARDeq model

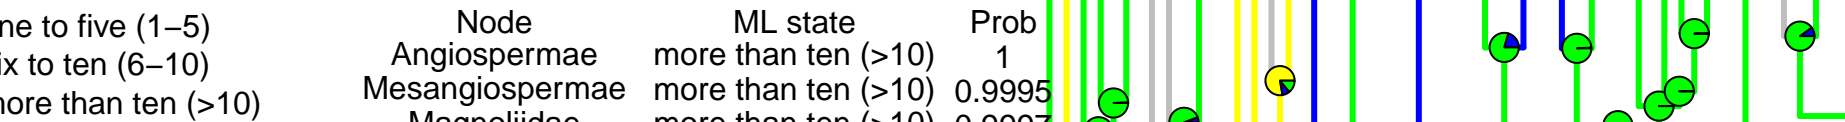

| Model   | LogL    | Npar | AIC     | AICc    | Delta AIC | Delta AICc | Prob   |
|---------|---------|------|---------|---------|-----------|------------|--------|
| ARD     | –492.9  | 6    | 997.8   | 997.8   | 2.15      | 0.76       | 0.998  |
| ARDeq** | –491.83 | 6    | 995.6   | 995.6   | 0         | 0          | 0.9997 |
| ER      | –533.13 | 1    | 1068.9  | 1068.9  | 72.3      | 72.1       | 0.9971 |
| SYM     | –527.27 | 3    | 1060.5  | 1060.5  | 64.6      | 64.4       | 0.9998 |
| SYMeq   | –526.96 | 3    | 1059.9  | 1059.9  | 64        | 63.9       | 0.9996 |
| ORD     | –506.84 | 4    | 1021.6  | 1021.6  | 25.1      | 25         | 0.9999 |
| ARDeq   | –506.26 | 4    | 1020.52 | 1020.52 | 24.81     | 24.8       | 0.9999 |
| ORDSYM  | –531.45 | 2    | 1066.89 | 1066.91 | 71.15     | 71         | 0.0041 |
| ORDSYMq | –531.09 | 2    | 1066.19 | 1066.2  | 70.44     | 70         | 0.0041 |
| ORDER   | –531.46 | 1    | 1064.92 | 1064.92 | 69.16     | 69         | 0.0041 |

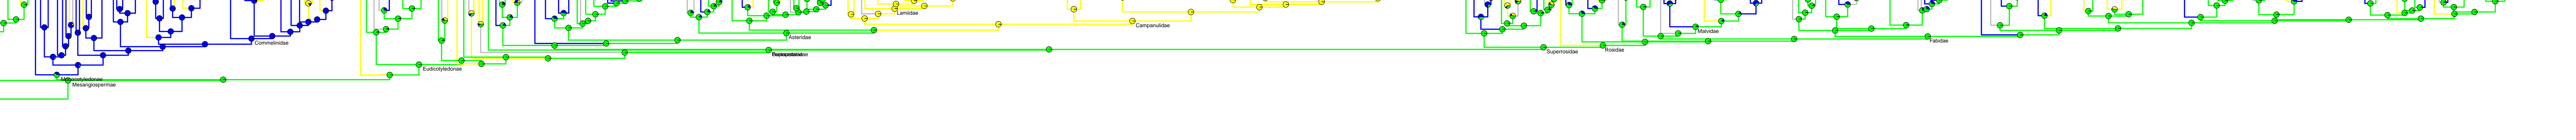



01\_C. Number of fertile stamens (binary) (D2c), ARDeq model

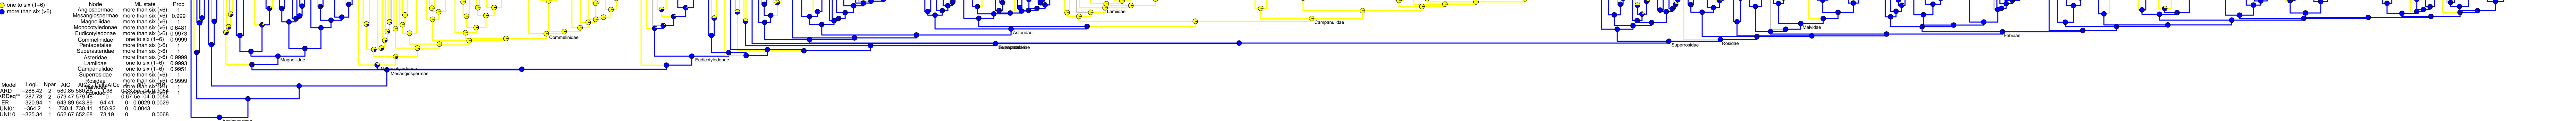



ML ancestral state reconstruction using rayDISC (R:corHMM)  
330\_A. Androecium structural phyllotaxy (binary) (D2d), ARD model

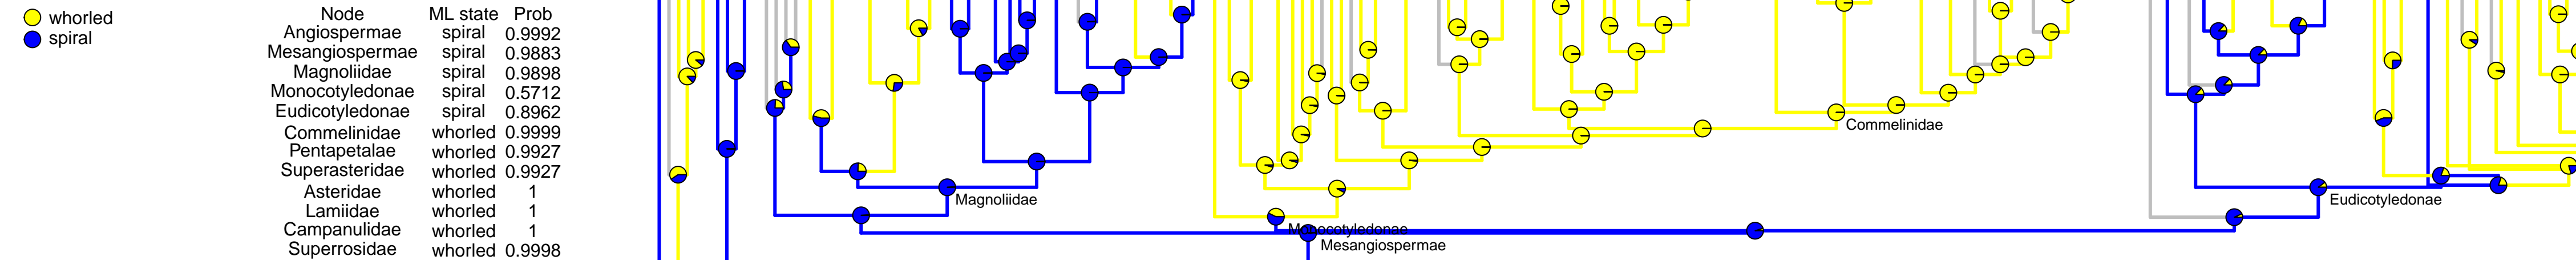

| Model | LogL   | Npar | AIC    | AICc   | Rosidae<br>Mantel<br>Cc | whorled<br>q10 | 0.9999 |
|-------|--------|------|--------|--------|-------------------------|----------------|--------|
| ARD** | -54.27 | 2    | 112.53 | 112.55 | 0.92                    | 0.007          |        |
| ARDeq | -57.95 | 2    | 119.9  | 119.92 | 0.02                    | 4e-04          |        |
| ER    | -58.67 | 1    | 119.34 | 119.34 | 6.8                     | 0.03           | 4e-04  |
| UNI01 | -58.64 | 1    | 119.29 | 119.29 | 6.75                    | 0.03           | 4e-04  |
| UNI10 | -80.64 | 1    | 163.29 | 163.29 | 50.75                   | 0              | 0.0186 |

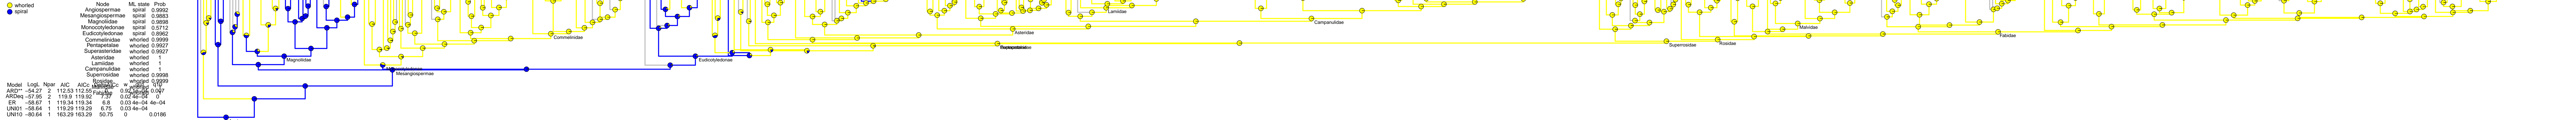



ML ancestral state reconstruction using rayDISC (R:corHMM)  
331\_A. Number of androecium structural whorls (3–state) (D2c), ORDeq model

● one (1)  
● two (2)  
● more than two (>2)

| Model   | LogL    | Npar | AIC    | ΔAIC   | ΔAICc | w     | 2w     | ... |
|---------|---------|------|--------|--------|-------|-------|--------|-----|
| ARD     | -232.39 | 6    | 476.78 | 3.72   | 0.08  | 0.999 | ...    | ... |
| ARDeq   | -231.35 | 6    | 474.69 | 1.64   | 0.23  | 0.999 | ...    | ... |
| ER      | -278.37 | 1    | 558.72 | 55.59  | 0.23  | 0.993 | ...    | ... |
| SYM     | -252.62 | 3    | 513.24 | 40.11  | 0.23  | 0.993 | ...    | ... |
| SYMeq   | -253.55 | 3    | 511.91 | 38.78  | 0.23  | 0.993 | ...    | ... |
| ORD     | -233.59 | 4    | 475.19 | 2.08   | 0.10  | 0.999 | ...    | ... |
| ORDeq** | -232.55 | 4    | 473.11 | 473.16 | 0     | 0.51  | 0      | ... |
| ORDSYM  | -254.21 | 2    | 512.42 | 512.43 | 39.27 | 0     | 0.0034 | ... |
| ORDSYMq | -253.49 | 2    | 510.99 | 511    | 37.84 | 0     | 0.0033 | ... |
| ORDER   | -259.57 | 1    | 521.15 | 521.15 | 47.99 | 0     | 0.0027 | ... |

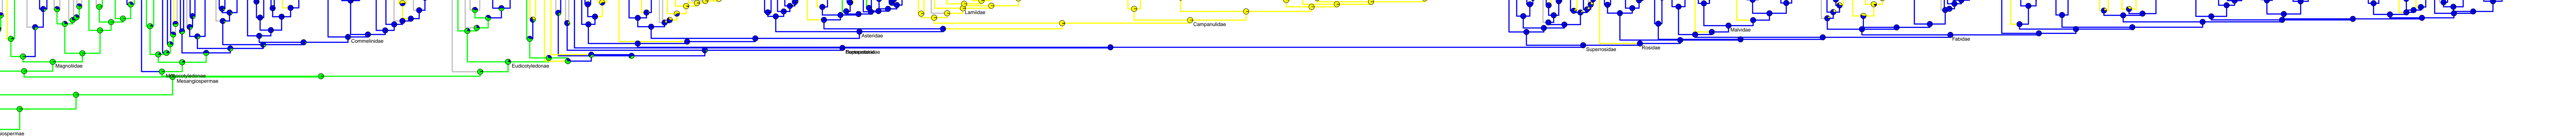



ML ancestral state reconstruction using rayDISC (R:corHMM)  
 332\_A. Androecium structural merism (4-state) (D2c), ORDeq model

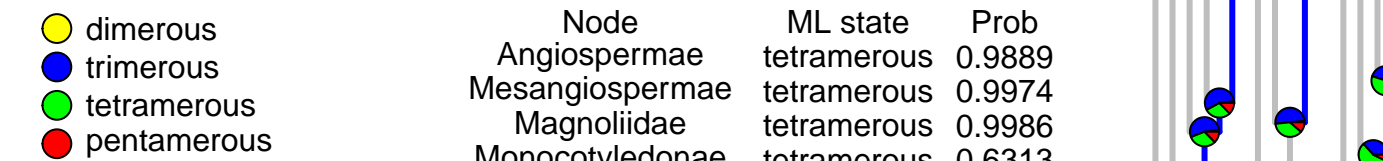

| Model   | LogL    | Npar | AIC    | ΔAIC   | ΔBIC   | ΔLRT  | ORDeq  | ORDeq** | ORDSYM | ORDSYMq | ORDER |
|---------|---------|------|--------|--------|--------|-------|--------|---------|--------|---------|-------|
| ARD     | -222.05 | 12   | 468.11 | 289.11 | 289.11 | 0.000 | 0.999  | 0.999   | 0.000  | 0.000   | ...   |
| ARDeq   | -221.23 | 12   | 466.47 | 287.47 | 287.47 | 0.000 | 0.997  | 0.997   | 0.000  | 0.000   | ...   |
| ER      | -236.89 | 1    | 475.75 | 296.75 | 296.75 | 0.000 | 0.004  | 0.004   | 0.000  | 0.000   | ...   |
| SYM     | -224.29 | 6    | 460.58 | 281.58 | 281.58 | 0.000 | 0.004  | 0.004   | 0.000  | 0.000   | ...   |
| SYMeq   | -223.05 | 6    | 458.1  | 278.1  | 278.1  | 0.000 | 0.004  | 0.004   | 0.000  | 0.000   | ...   |
| ORD     | -84.47  | 6    | 180.94 | 179.94 | 179.94 | 0.000 | 0.945  | 0.945   | 0.000  | 0.000   | ...   |
| ORDeq** | -83.65  | 6    | 179.3  | 179.3  | 179.3  | 0.000 | 0.946  | 0.946   | 0.000  | 0.000   | ...   |
| ORDSYM  | -258.07 | 3    | 522.13 | 522.16 | 522.16 | 0.000 | 0.0019 | 0.0019  | 0.000  | 0.000   | ...   |
| ORDSYMq | -257.18 | 3    | 520.36 | 520.39 | 520.39 | 0.000 | 0.0019 | 0.0019  | 0.000  | 0.000   | ...   |
| ORDER   | -258.96 | 1    | 519.92 | 519.93 | 519.93 | 0.000 | 0.0029 | 0.0029  | 0.000  | 0.000   | ...   |

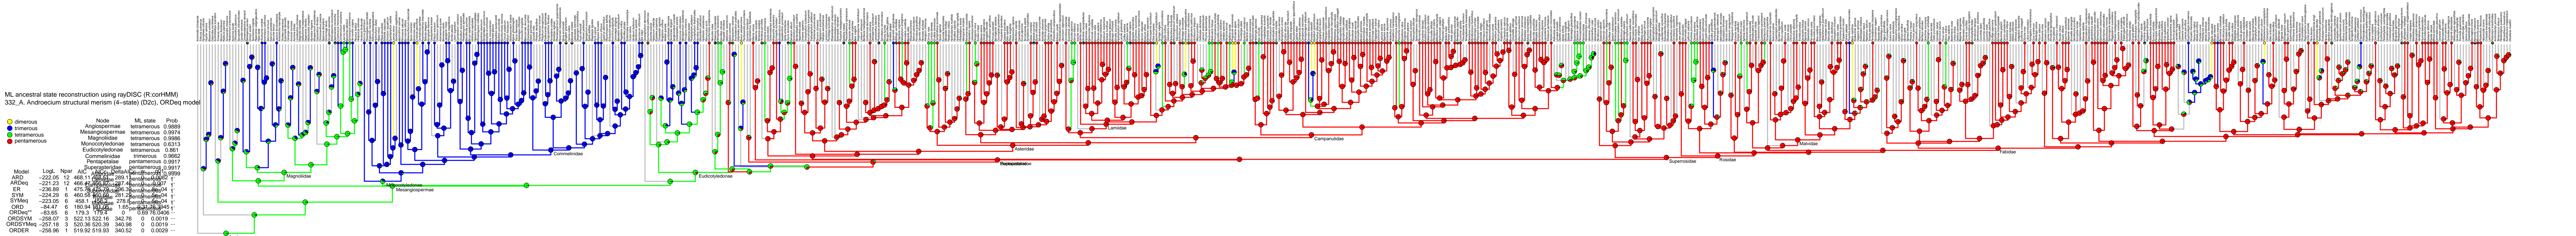



ML ancestral state reconstruction using rayDISC (R:corHMM)  
 332\_B. Androecium structural merism (3–state) (D2c), ARDeq model

● trimerous  
● tetramerous  
● pentamerous

| Model    | LogL    | Npar | AIC    | ΔAIC   | ΔAIC <sub>2</sub> | ML state    | Prob   |
|----------|---------|------|--------|--------|-------------------|-------------|--------|
| ARD      | -170.56 | 6    | 353.12 | 1.96   | 0.04              | tetramerous | 0.9999 |
| ARDeq**  | -169.58 | 6    | 351.16 | 0      | 0.9929            | tetramerous | 1      |
| ER       | -185.95 | 1    | 373.86 | 22.69  | 0.967             | tetramerous | 0.9999 |
| SYM      | -176.38 | 3    | 358.76 | 6.64   | 0.9996            | tetramerous | 0.9999 |
| SYMeq    | -175.38 | 3    | 356.77 | 5.53   | 0.9994            | tetramerous | 0.9999 |
| ORD      | -177.5  | 4    | 363.01 | 11.78  | 0.9589            | tetramerous | 0.9999 |
| ORDeq    | -177.35 | 4    | 362.7  | 11.48  | 0.9589            | tetramerous | 0.9999 |
| ORDSYM   | -185.19 | 2    | 374.38 | 374.39 | 23.12             | 0           | 0.0018 |
| ORDSYMeq | -184.29 | 2    | 372.57 | 372.59 | 21.32             | 0           | 0.0018 |
| ORDER    | -186.13 | 1    | 374.26 | 374.26 | 23                | 0           | 0.0026 |

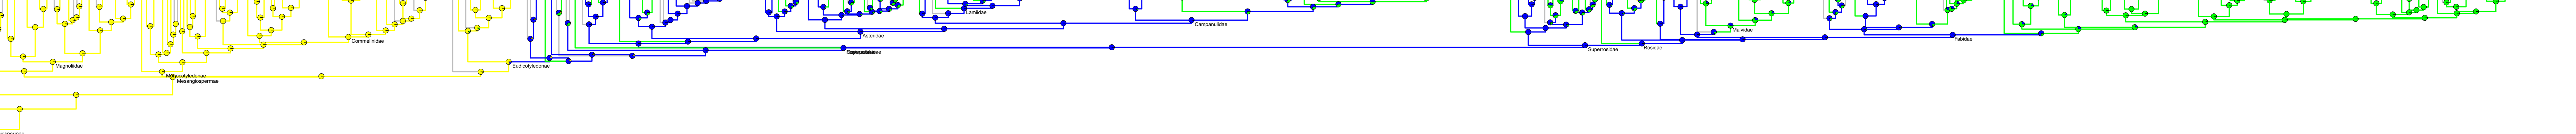





ancestral state reconstruction using ancestral.pars  
(phangorn)

A. Anther orientation (D2d), 109 steps

|          | Node            | MP state(s)         |
|----------|-----------------|---------------------|
| introrse | Angiospermae    | introrse            |
| atrorse  | Mesangiospermae | introrse / extrorse |
| extrorse | Magnoliidae     | extrorse            |
|          | Monocotyledonae | introrse            |
|          | Eudicotyledonae | introrse / extrorse |
|          | Commelinidae    | introrse            |
|          | Pentapetalae    | introrse / latrorse |
|          | Superasteridae  | introrse / latrorse |
|          | Asteridae       | introrse            |
|          | Lamiidae        | introrse            |
|          | Campanulidae    | introrse            |
|          | Superrosidae    | introrse            |
|          | Rosidae         | introrse            |
|          | Malvidae        | introrse            |
|          | Fabidae         | introrse            |

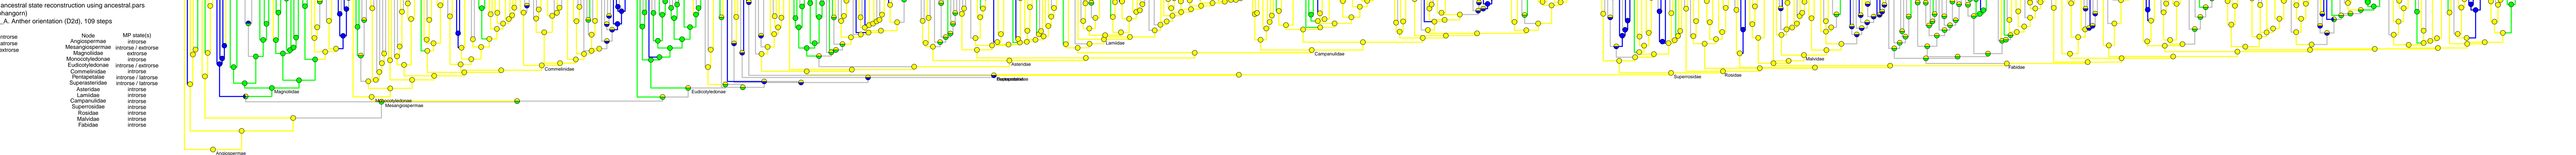



MP ancestral state reconstruction using ancestral.pars  
(R:phangorn)  
312\_A. Anther attachment (binary) (D2d, 97 steps)

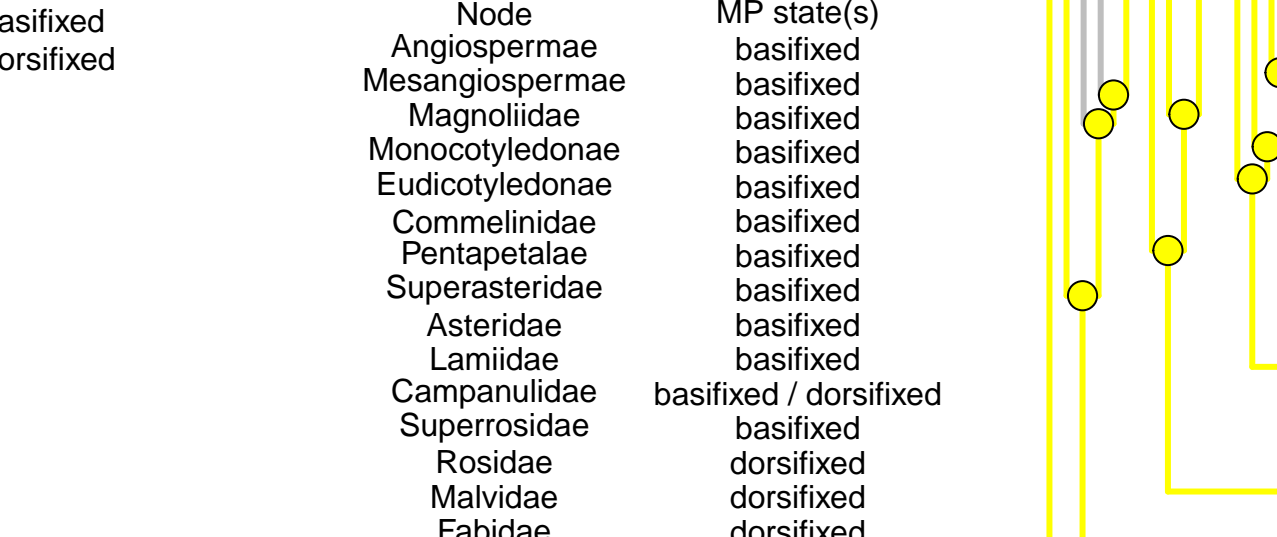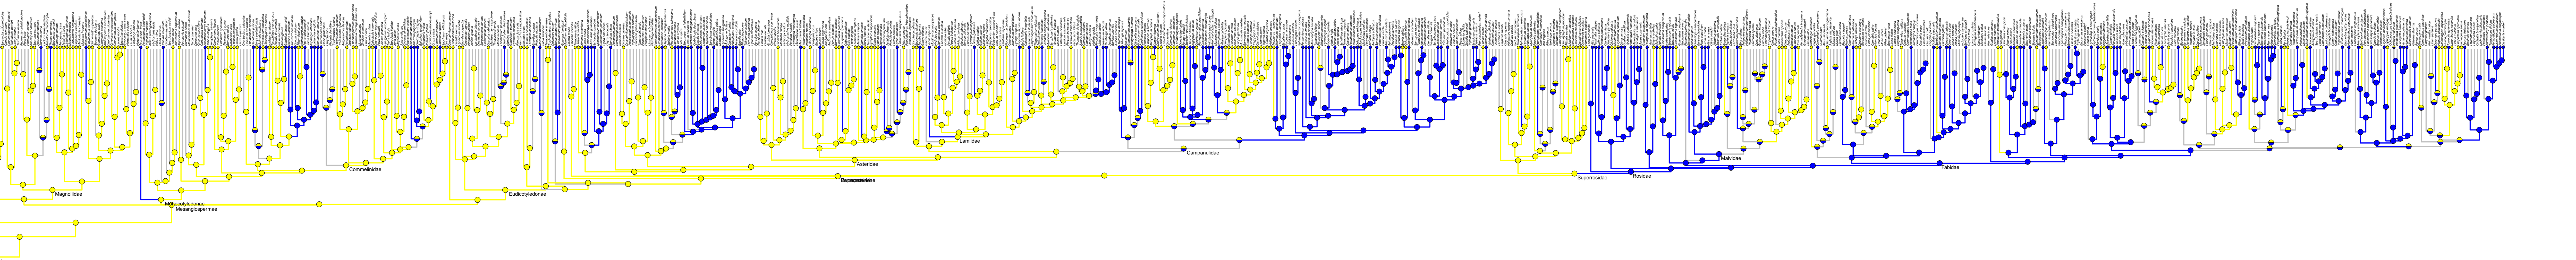

12\_A. Anther attachment (binary) (D2d, ARDeq model)

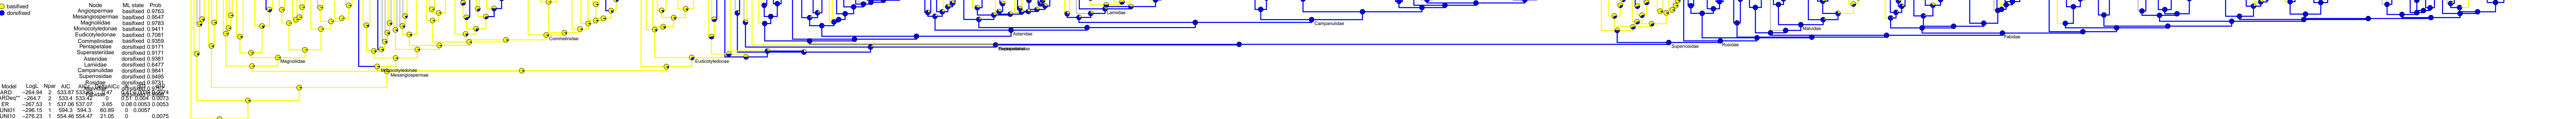





MP ancestral state reconstruction using ancestral.pars  
(R:phangorn)

401\_B. Number of structural carpels (5-state) (D2c, 187 steps)

- one (1)
- two (2)
- three (3)
- four or five (4-5)
- more than five (>5)

- | Node            | MP state(s)         |
|-----------------|---------------------|
| Angiospermae    | more than five (>5) |
| Mesangiospermae | more than five (>5) |
| Magnoliidae     | more than five (>5) |
| Monocotyledonae | three (3)           |
| Eudicotyledonae | more than five (>5) |
| Commelinidae    | three (3)           |
| Pentapetalae    | four or five (4-5)  |
| Superasteridae  | four or five (4-5)  |
| Asteridae       | four or five (4-5)  |
| Lamiidae        | two (2)             |
| Campanulidae    | two (2)             |
| Superrosidae    | four or five (4-5)  |
| Rosidae         | four or five (4-5)  |
| Malvidae        | four or five (4-5)  |
| Fabidae         | four or five (4-5)  |

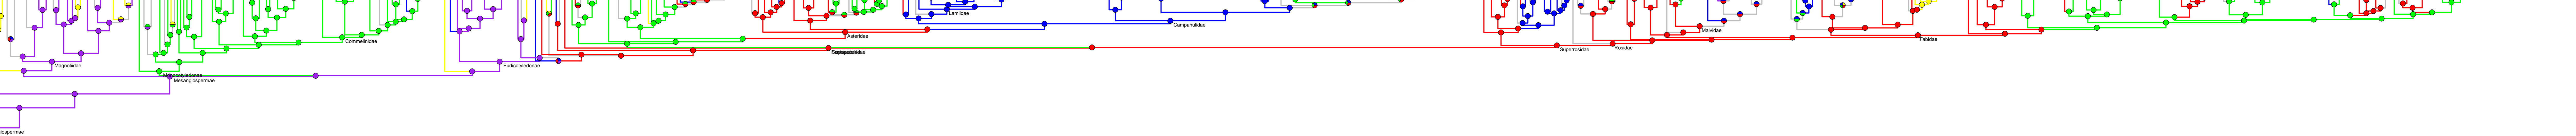

ML ancestral state reconstruction using rayDISC (R:corHMM)  
401\_B. Number of structural carpels (5–state) (D2c), ARDeq model

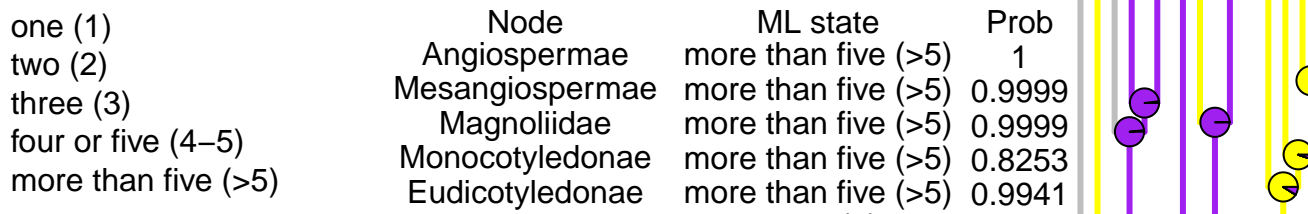

| Model   | LogL    | Npar | AIC     | Delta AIC | Prob   |
|---------|---------|------|---------|-----------|--------|
| ARD     | -664.41 | 20   | 1368.8  | 3.12      | 0.994  |
| ARDeq** | -662.85 | 20   | 1365.2  | 0         | 0.9985 |
| ER      | -718.48 | 1    | 1438.5  | 72.68     | 0.9659 |
| SYM     | -688    | 10   | 1396.5  | 27.68     | 0.9999 |
| SYMeq   | -686.76 | 10   | 1393.5  | 29.4      | 0.9991 |
| ORD     | -756.87 | 8    | 1529.7  | 161.31    | 1      |
| ORDeq   | -755.95 | 8    | 1527.91 | 163.4     | 0.9999 |
| ORDSYM  | -760.38 | 4    | 1528.77 | 162.03    | 0.0038 |
| ORDSYMq | -759.68 | 4    | 1527.35 | 160.61    | 0.0038 |
| ORDER   | -766.45 | 1    | 1534.89 | 168.11    | 0.0055 |

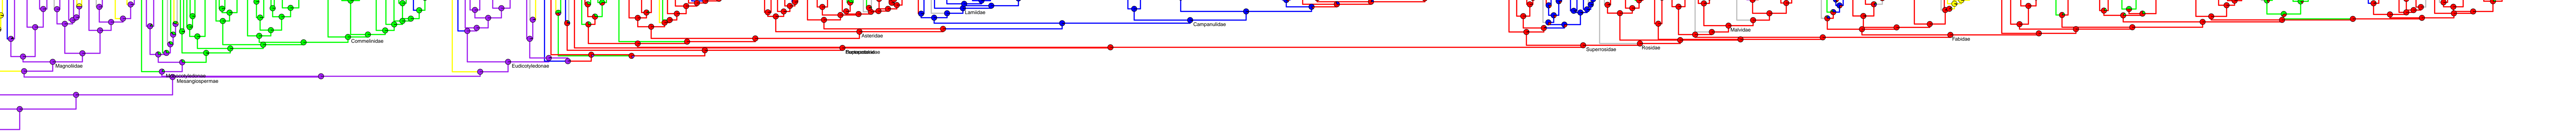



ML ancestral state reconstruction using rayDISC (R:corHMM)  
400\_A. Gynoecium phyllotaxy (D2d), ARDeq model

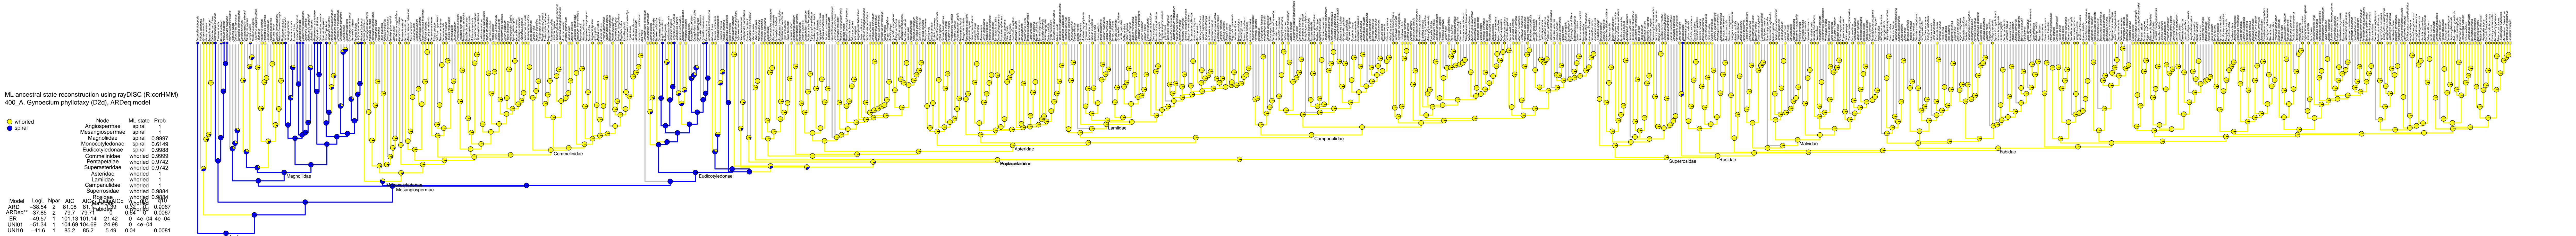



ML ancestral state reconstruction using rayDISC (R:corHMM)  
403\_A. Fusion of ovaries (binary) (D2c), ER model

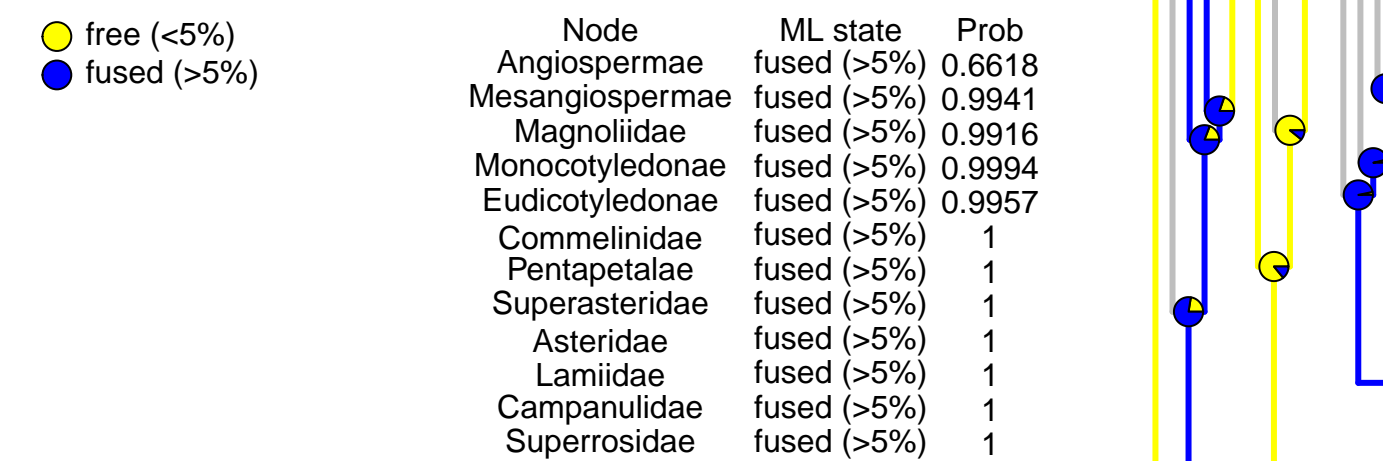

| Model | LogL    | Npar | AIC    | AICc   | Russell | MAIS | CC     | Wused  | 01.0%  | 01.0%  | 1      |
|-------|---------|------|--------|--------|---------|------|--------|--------|--------|--------|--------|
| ARD   | -100.54 | 2    | 205.08 | 205.15 | 0.88    | 0.88 | 0.88   | 0.88   | 0.88   | 0.88   | 0.88   |
| ARDeg | -100.52 | 2    | 205.03 | 205.05 | 1.68    | 0.21 | 9e-04  | 7e-04  | 7e-04  | 7e-04  | 7e-04  |
| ER*   | -100.68 | 1    | 203.36 | 203.37 | 0       | 0.49 | 7e-04  | 7e-04  | 7e-04  | 7e-04  | 7e-04  |
| UNI01 | -102.29 | 1    | 206.59 | 206.59 | 3.22    | 0.1  | 0.0101 | 0.0101 | 0.0101 | 0.0101 | 0.0101 |
| UNI10 | -105.94 | 1    | 213.88 | 213.89 | 10.52   | 0    | 8e-04  | 8e-04  | 8e-04  | 8e-04  | 8e-04  |

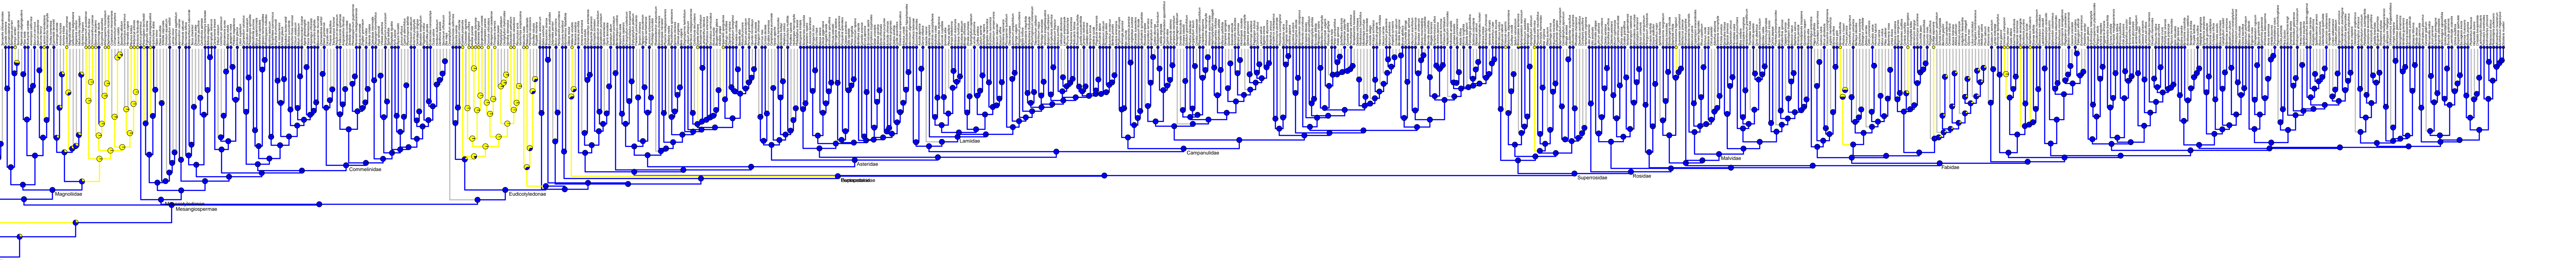



ancestral state reconstruction using rayDISC (R:corHMM)  
1\_A. Number of ovules per functional carpel (3-state) (D2c), ARDeq model

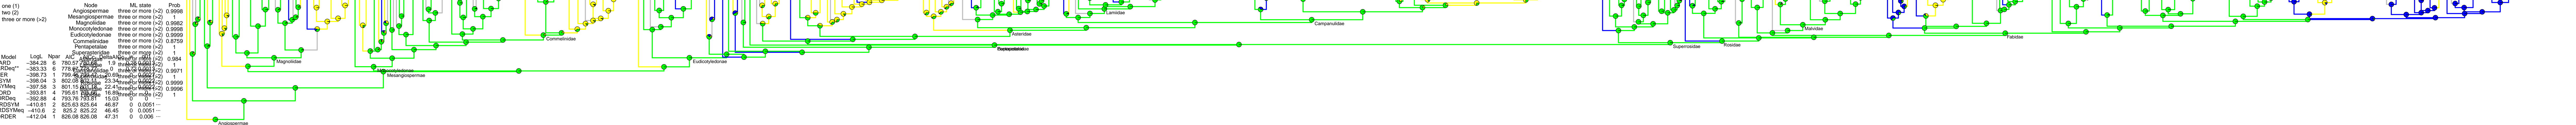

Supplement: Supplementary Data 21 [file ncomms16047-s22.pdf]
