# Supplementary material for: The ancestral flower of angiosperms and its early diversification
Source: Nat Commun. 2017 Aug 1;8:16047. doi: 10.1038/ncomms16047 (PMC5543309; doi:10.1038/ncomms16047)

ML ancestral state reconstruction using rayDISC (R:corHMM)  
100\_A. Functional sex of flowers (D2d), ARdeq model

● bisexual

● unisexual

Node

ML state

Prob

Angiospermae

bisexual

1

Mesangiospermae

bisexual

1

Magnoliidae

bisexual

1

Monocotyledonae

bisexual

1

Eudicotyledonae

bisexual

1

Commelinidae

bisexual

0.9997

Pentapetalae

bisexual

1

Superasteridae

bisexual

1

Asteridae

bisexual

1

Lamiidae

bisexual

1

Campanulidae

bisexual

0.9991

Superrosidae

bisexual

1

Rosidae

bisexual

1

|        |         |      |        |        |        |        |        |        |
|--------|---------|------|--------|--------|--------|--------|--------|--------|
| Model  | LogL    | Npar | AIC    | AICc   | MAICc  | MAICc  | MAICc  | MAICc  |
| ARD    | -311.75 | 2    | 627.5  | 627.5  | 0.0028 | 0.0028 | 8e-04  | 0.0028 |
| ARDeq* | -311.12 | 2    | 626.24 | 626.25 | 0      | 0.45   | 0.0028 | 7e-04  |
| ER     | -312.19 | 1    | 630.38 | 630.38 | 4.13   | 0.06   | 0.0027 | 0.0027 |
| UNI01  | -312.72 | 1    | 627.44 | 627.45 | 1.19   | 0.25   | 0.0028 | 0.0028 |
| UNI10  | -358.95 | 1    | 719.9  | 719.9  | 93.65  | 0      | 0.011  | 0.011  |

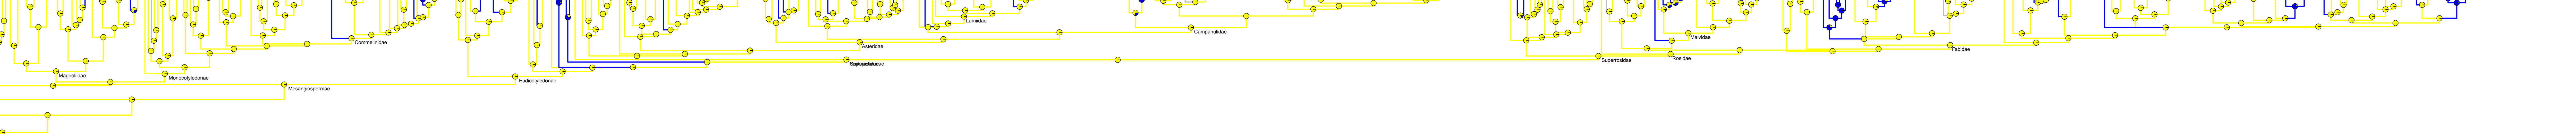

MP ancestral state reconstruction using ancestral.pars  
(R:phangorn)  
100\_B. Structural sex of flowers (D2d), 54 steps

[illegible]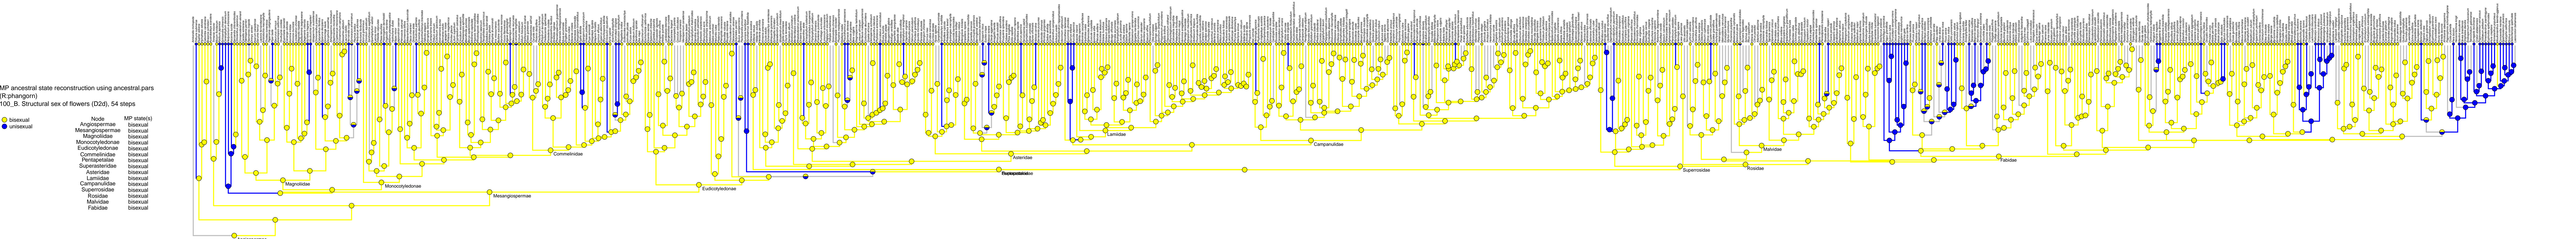

ML ancestral state reconstruction using rayDISC (R:corHMM)  
 100\_B. Structural sex of flowers (D2d), ARDeq model

● bisexual  
 ● unisexual

| Node            | ML state | Prob   |
|-----------------|----------|--------|
| Angiospermae    | bisexual | 0.9972 |
| Mesangiospermae | bisexual | 0.9992 |
| Magnoliidae     | bisexual | 0.9999 |
| Monocotyledonae | bisexual | 0.9998 |
| Eudicotyledonae | bisexual | 0.9999 |
| Commelinidae    | bisexual | 1      |
| Pentapetalae    | bisexual | 1      |
| Superasteridae  | bisexual | 1      |
| Asteridae       | bisexual | 1      |
| Lamiidae        | bisexual | 0.9999 |
| Campanulidae    | bisexual | 1      |
| Superrosidae    | bisexual | 1      |
| Rosidae         | bisexual | 1      |

| Model  | LogL    | Npar | AIC    | AICc   | MAIC   | MAICc  |
|--------|---------|------|--------|--------|--------|--------|
| ARD    | -207.51 | 2    | 419.02 | 419.05 | 0.9999 | 0.9999 |
| ARDeq* | -207.07 | 2    | 418.14 | 418.15 | 0.48   | 0.0035 |
| ER     | -208.89 | 1    | 419.78 | 419.78 | 1.63   | 0.0015 |
| UNI01  | -227.23 | 1    | 456.47 | 456.47 | 38.32  | 0.0016 |
| UNI10  | -234.16 | 1    | 470.31 | 470.32 | 52.17  | 0.0152 |

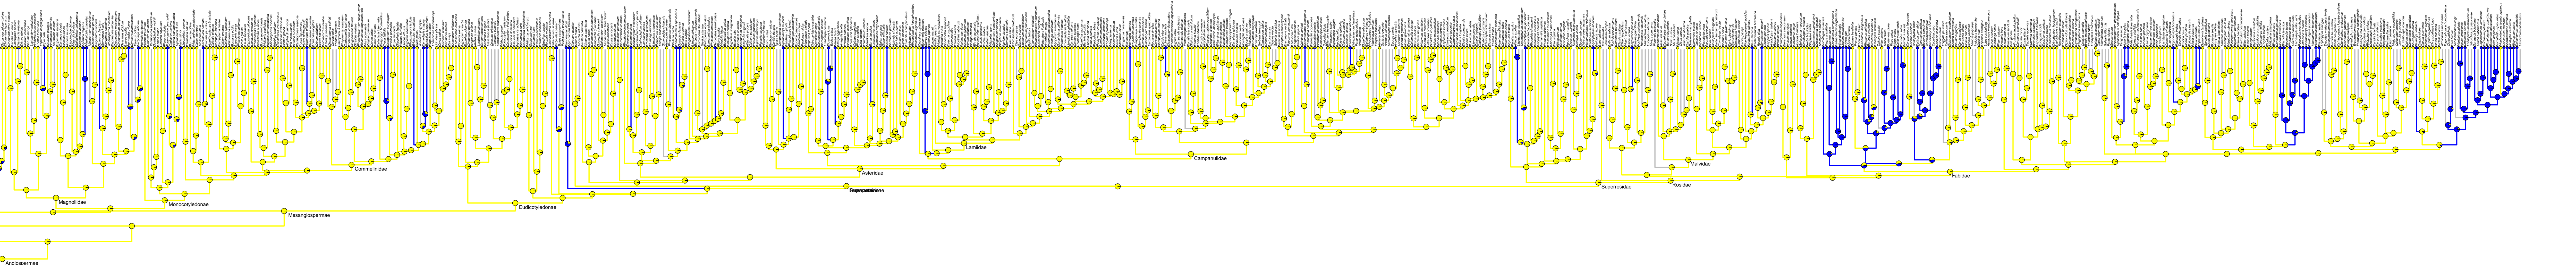

MP ancestral state reconstruction using ancestral.pars  
R:phangorn)  
02\_B. Ovary position (binary) (D2d), 78 steps

|            | Node            | MP state(s) |
|------------|-----------------|-------------|
| ● superior | Angiospermae    | superior    |
|            | Mesangiospermae | superior    |
| ● inferior | Magnoliidae     | superior    |
|            | Monocotyledonae | superior    |
| ● superior | Eudicotyledonae | superior    |
|            | Commelinidae    | superior    |
| ● superior | Pentapetalae    | superior    |
|            | Superasteridae  | superior    |
| ● superior | Asteridae       | superior    |
|            | Lamiidae        | superior    |
| ● superior | Campanulidae    | superior    |
|            | Superrosidae    | superior    |
| ● superior | Rosidae         | superior    |
|            | Malvidae        | superior    |
| ● superior | Fabidae         | superior    |

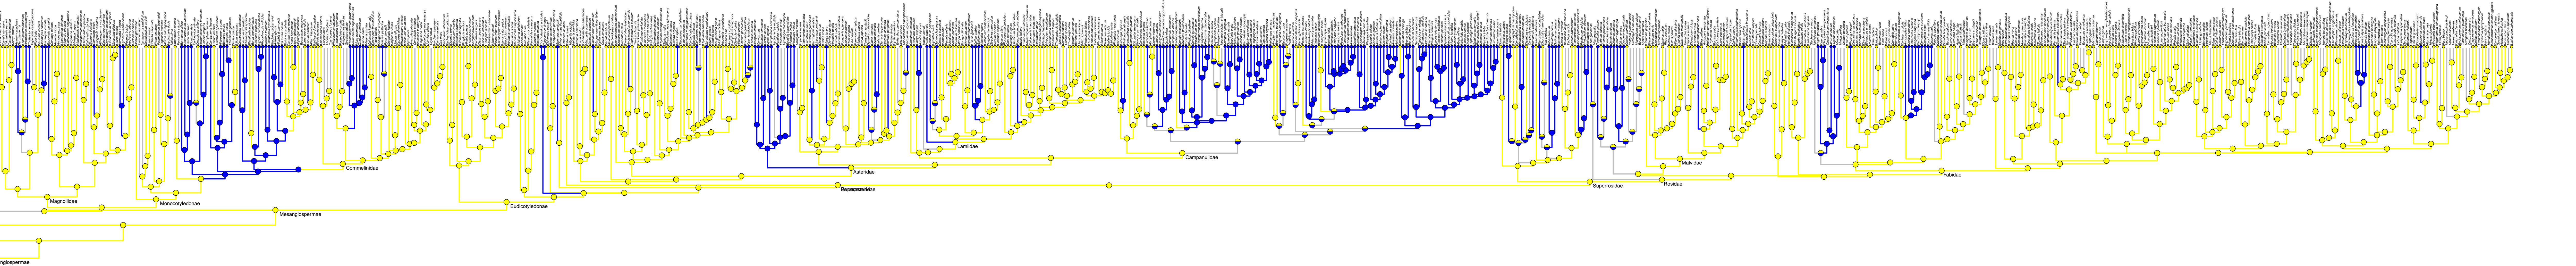

02\_B. Ovary position (binary) (D2d), ARDeq model

● superior  
● inferior

| Node            | ML state | Prob   |
|-----------------|----------|--------|
| Angiospermae    | superior | 0.9999 |
| Nonangiospermae | superior | 0.9999 |
| Magnoliidae     | superior | 0.999  |
| Monocotyledonae | superior | 0.9948 |
| Eudicotyledonae | superior | 0.9999 |
| Commelinidae    | superior | 0.787  |
| Pentapetalae    | superior | 0.9998 |
| Superasteridae  | superior | 0.9998 |
| Asteridae       | superior | 0.9636 |
| Lamiidae        | superior | 0.9708 |
| Campanulidae    | superior | 0.7795 |
| Superrosidae    | superior | 0.991  |

| Model  | LogL    | Npar | AIC    | AIC <sub>Mardia</sub> | AIC <sub>C</sub> | superior to | p-value |
|--------|---------|------|--------|-----------------------|------------------|-------------|---------|
| ARD    | -270.5  | 2    | 545    | 545.0                 | 546.21           | 0.9990      | 0.9990  |
| ARDeq* | -269.9  | 2    | 543.79 | 543.81                | 0                | 0.49        | 0.0019  |
| ER     | -271.63 | 1    | 545.26 | 545.27                | 1.46             | 0.24        | 0.0022  |
| UNI01  | -279.19 | 1    | 560.39 | 560.39                | 16.58            | 0           | 0.0025  |
| UNI10  | -296.05 | 1    | 594.09 | 594.1                 | 50.29            | 0           | 0.0091  |

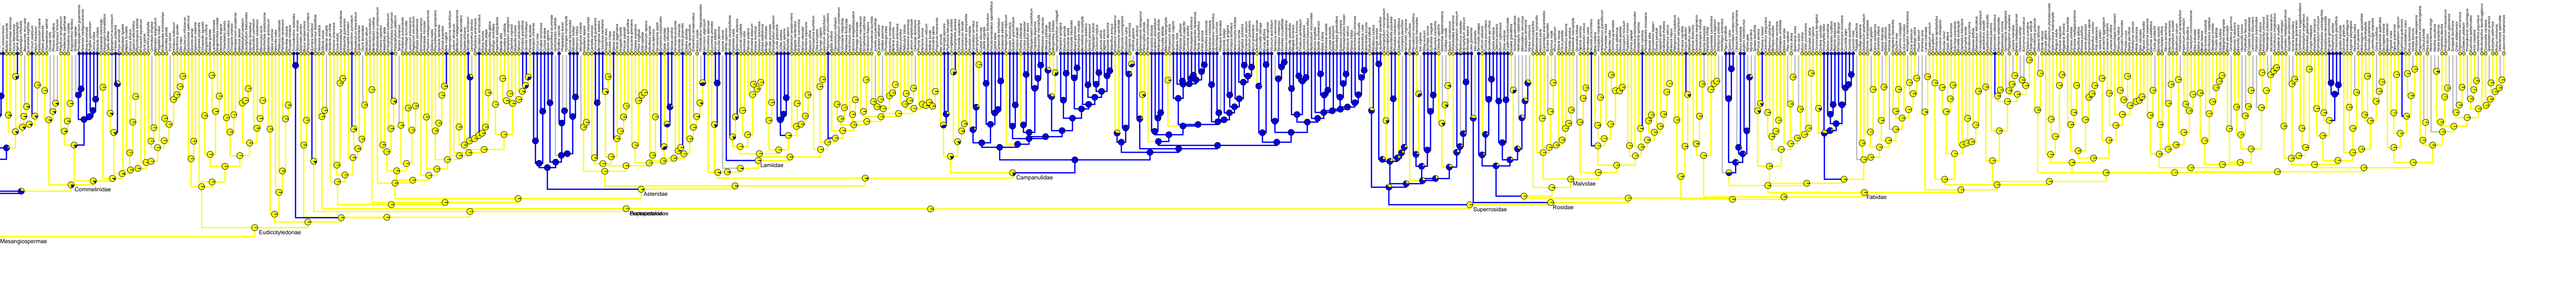

ancestral state reconstruction using ancestral.pars  
(phangorn)

\_A. Perianth presence (D2c), 20 steps

absent  
present

| Node        | MP state(s) |
|-------------|-------------|
| iospermae   | present     |
| ngiospermae | present     |
| gnoliidae   | present     |
| cotyledonae | present     |
| cotyledonae | present     |
| nmelinidae  | present     |
| tapetalae   | present     |
| erasteridae | present     |
| steridae    | present     |
| amiidae     | present     |
| npanulidae  | present     |
| berrosidae  | present     |
| rosidae     | present     |
| malvidae    | present     |
| fabidae     | present     |

A diagram showing a 2D lattice structure. It consists of several vertical blue lines. A single yellow line runs vertically through the center. Blue circles are placed at the intersections of the lines: one on the yellow line, and two on the blue lines to its right.

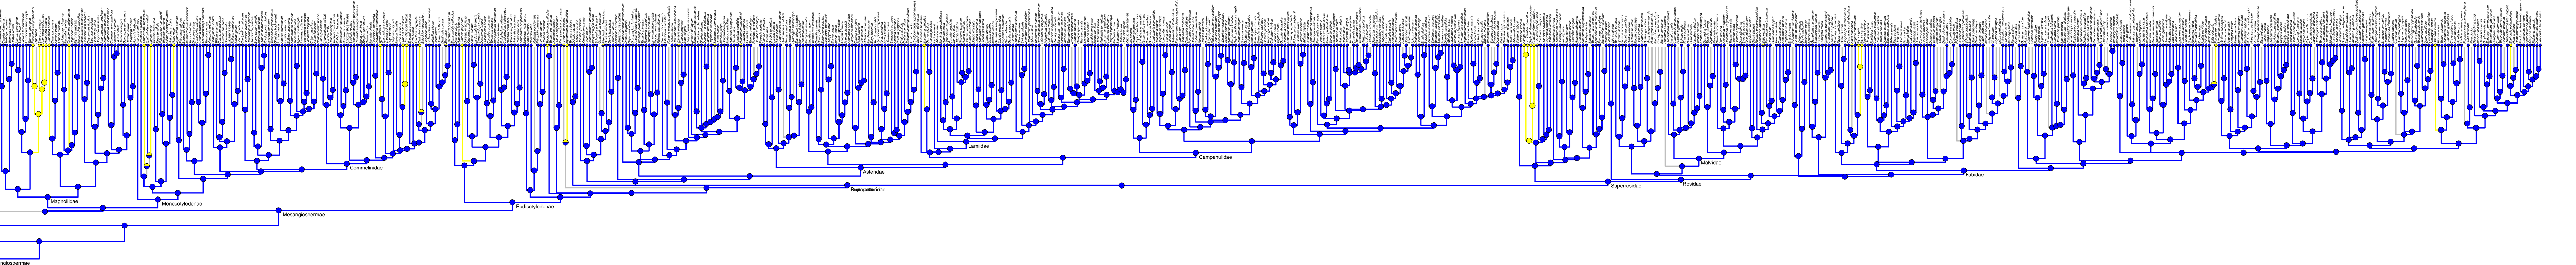

ML ancestral state reconstruction using rayDISC (R:corHMM)  
201\_A. Perianth presence (D2c), UNI10 model

● absent  
● present

| Node            | ML state | Prob |
|-----------------|----------|------|
| Angiospermae    | present  | 1    |
| Mesangiospermae | present  | 1    |
| Magnoliidae     | present  | 1    |
| Monocotyledonae | present  | 1    |
| Eudicotyledonae | present  | 1    |
| Commelinidae    | present  | 1    |
| Pentapetalae    | present  | 1    |
| Superasteridae  | present  | 1    |
| Asteridae       | present  | 1    |
| Lamiidae        | present  | 1    |
| Campanulidae    | present  | 1    |
| Superrosidae    | present  | 1    |
| Rosidae         | present  | 1    |

| Model  | LogL    | Npar | AIC    | AICc   | BayesAICc | Present | 1 q10  |
|--------|---------|------|--------|--------|-----------|---------|--------|
| ARD    | -95.31  | 2    | 194.62 | 194.62 | 0.62      | 0.25    | 5e-04  |
| ARDq   | -95.42  | 2    | 193.24 | 193.25 | 0.62      | 0.25    | 5e-04  |
| ER     | -95.51  | 1    | 193.03 | 193.03 | 0.4       | 0.28    | 5e-04  |
| UNI01  | -112.16 | 1    | 226.32 | 226.32 | 33.69     | 0       | 0.0193 |
| UNI01* | -95.31  | 1    | 192.62 | 192.63 | 0         | 0.34    | 5e-04  |

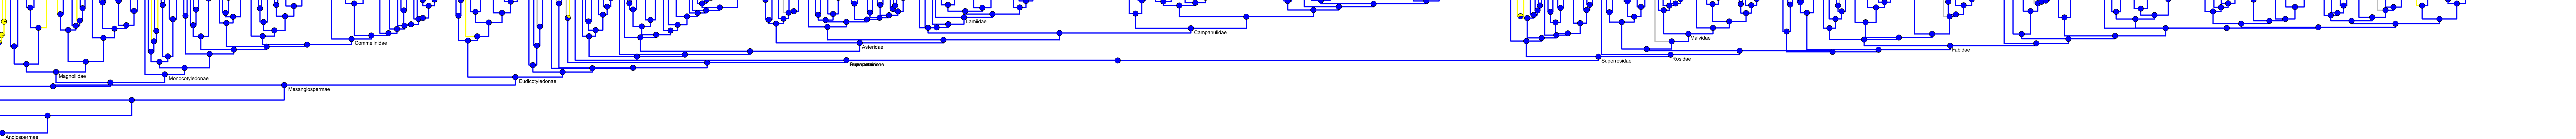

MP ancestral state reconstruction using ancestral.pars  
(R:phangorn)  
201\_B. Number of perianth parts (3-state) (D2c), 86 steps

- one to five (1-5)
- six to ten (6-10)
- more than ten (>10)

- Node
- Angiospermae
- Mesangiospermae
- Magnoliidae
- Monocotyledonae
- Eudicotyledonae
- Commelinidae
- Pentapetalae
- Superasteridae
- Asteridae
- Lamiidae
- Campanulidae
- Superrosidae
- Rosidae
- Malvidae
- Fabidae

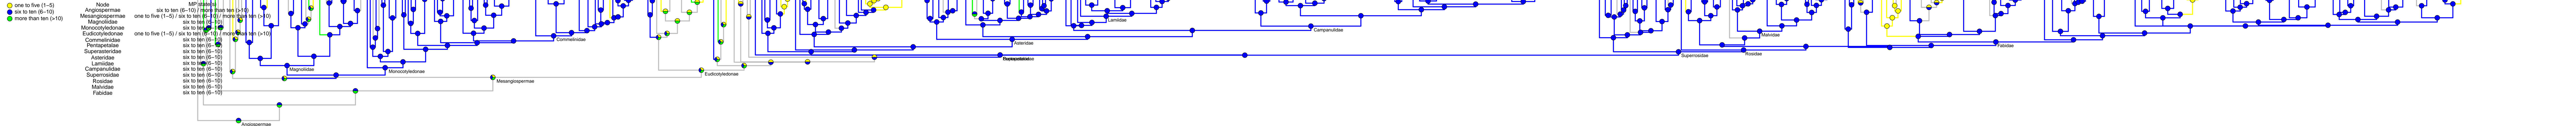

ML ancestral state reconstruction using rayDISC (R:corHMM)  
201\_B. Number of perianth parts (3-state) (D2c), ARDeq model

● one to five (1-5)  
● six to ten (6-10)  
● more than ten (>10)

| Model                | LogL    | Npar | AIC    | AICc   | DeltaAIC | ML state            | Prob       |
|----------------------|---------|------|--------|--------|----------|---------------------|------------|
| ARD                  | -326.67 | 6    | 665.35 | 665.35 | 2.13     | more than ten (>10) | 0.9992     |
| ARD <sup>eq</sup>    | -325.61 | 6    | 663.28 | 663.28 | 0        | more than ten (>10) | 0.9989     |
| ER                   | -351.86 | 1    | 705.59 | 705.59 | 42.41    | six to ten (6-10)   | 0.6009     |
| SYM                  | -340.65 | 3    | 687.31 | 687.31 | 24.02    | more than ten (>10) | 0.9931     |
| SYM <sup>eq</sup>    | -339.82 | 3    | 685.63 | 685.63 | 22.34    | more than ten (>10) | 0.9931     |
| ORD                  | -332.94 | 4    | 673.88 | 673.88 | 10.61    | six to ten (6-10)   | 0.9938     |
| ORD <sup>eq</sup>    | -331.86 | 4    | 671.73 | 671.73 | 8.61     | six to ten (6-10)   | 0.9938     |
| ORDSYM               | -344.09 | 2    | 692.17 | 692.17 | 28.86    | six to ten (6-10)   | 0.002 ...  |
| ORDSYM <sup>eq</sup> | -343.35 | 2    | 690.71 | 690.72 | 27.4     | six to ten (6-10)   | 0.002 ...  |
| ORDER                | -353.58 | 1    | 709.15 | 709.16 | 45.84    | six to ten (6-10)   | 0.0013 ... |

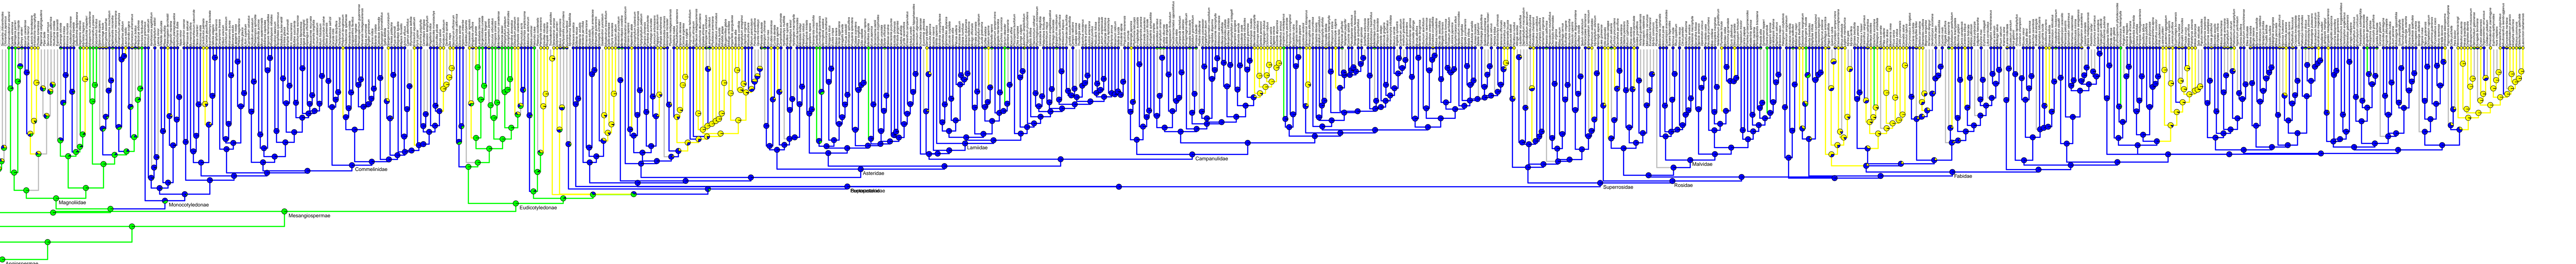



01\_C. Number of perianth parts (binary) (D2c), ARDeq model

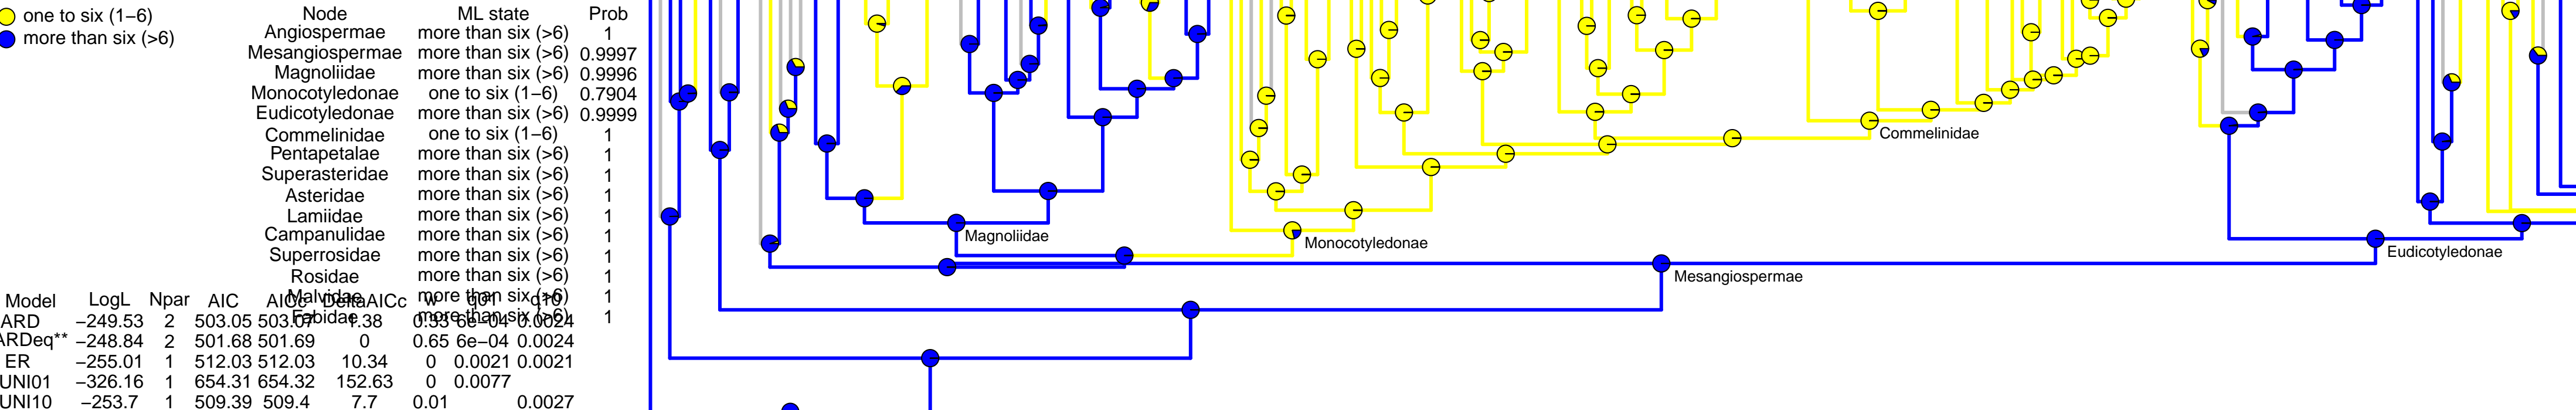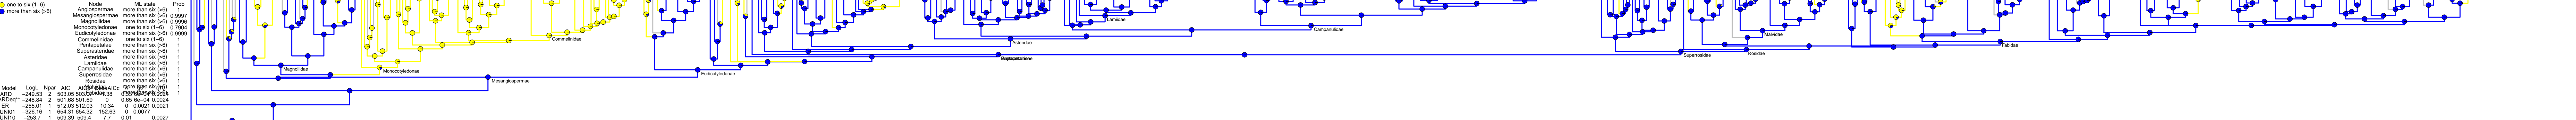



30\_A. Perianth phyllotaxy (binary) (D2d), ARDeg model

● whorled

| Node        | ML state | Prob   |
|-------------|----------|--------|
| iospermae   | spiral   | 1      |
| ngiospermae | spiral   | 0.9997 |
| agnoliidae  | spiral   | 0.9947 |
| cotyledonae | whorled  | 0.5446 |
| cotyledonae | spiral   | 0.9989 |
| nnelinidae  | whorled  | 0.9999 |
| atapetalae  | whorled  | 0.9734 |
| erasteridae | whorled  | 0.9734 |
| steridae    | whorled  | 0.9995 |
| amiidae     | whorled  | 1      |
| npanulidae  | whorled  | 1      |
| errosidae   | whorled  | 0.9914 |

| Model                | LogL   | Npar | AIC    | AICc   | AIC <sub>Bayes</sub> | AIC <sub>ICc</sub> | whorled | whorled d10 |
|----------------------|--------|------|--------|--------|----------------------|--------------------|---------|-------------|
| ARD                  | -70.45 | 2    | 144.9  | 144.92 | 144.92               | 0.0093             | 0.0093  | 0.0093      |
| ARD <sub>eq</sub> ** | -69.76 | 2    | 143.52 | 143.53 | 0                    | 0.662e-04          | 0.0093  | 0.0093      |
| ER                   | -76.8  | 1    | 155.6  | 155.6  | 12.07                | 0                  | 4e-04   | 4e-04       |
| UNI01                | -77.3  | 1    | 156.6  | 156.61 | 13.07                | 0                  | 4e-04   | 4e-04       |
| UNI10                | -78.74 | 1    | 159.48 | 159.48 | 15.95                | 0                  | 0.0154  | 0.0154      |

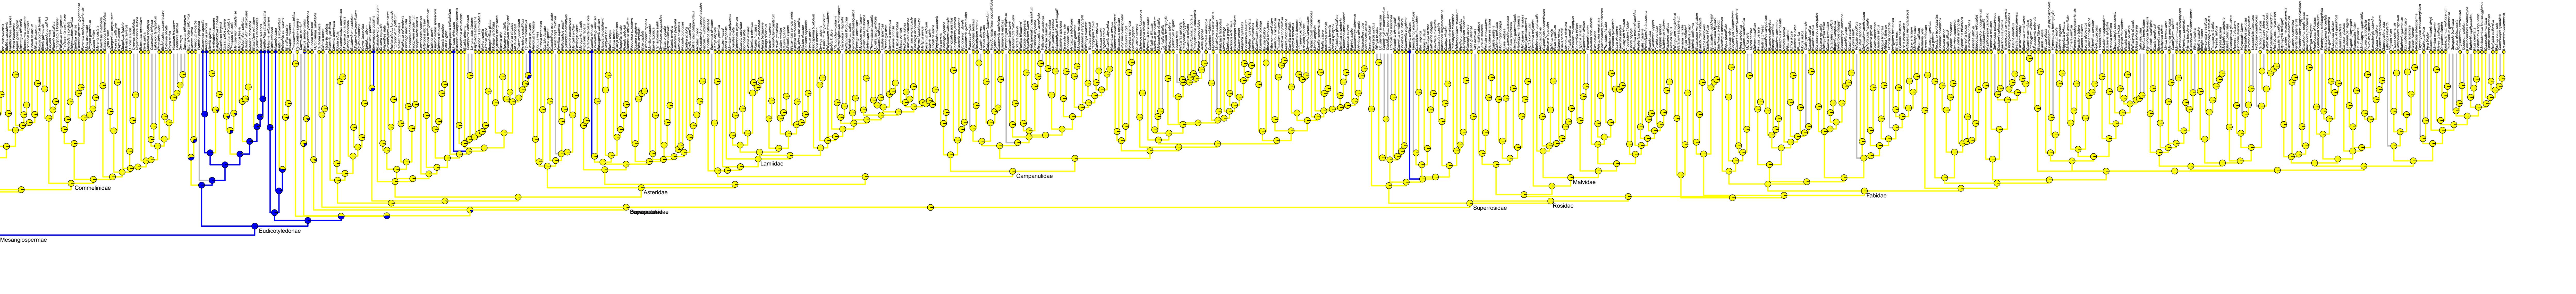



ML ancestral state reconstruction using rayDISC (R:corHMM)  
231\_A. Number of perianth whorls (D2c), ARDeq model

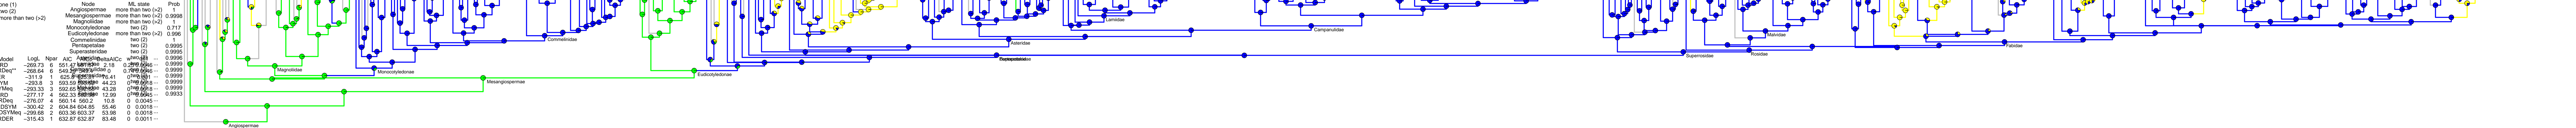

MP ancestral state reconstruction using ancestral.pars  
(R:phangorn)  
232\_A. Perianth merism (4-state) (D2c), 84 steps

● dimerous  
● trimerous  
● tetramerous  
● pentamerous

Node  
Angiospermae  
Mesangiospermae  
Magnoliidae  
Monocotyledonae  
Eudicotyledonae  
Commelinidae  
Pentapetalae  
Superasteridae  
Asteridae  
Lamiidae  
Campanulidae  
Superrosidae  
Rosidae  
Malvidae  
Fabidae

MP state(s)  
trimerous  
trimerous  
trimerous  
trimerous  
trimerous / trimerous  
trimerous  
pentamerous  
pentamerous  
pentamerous  
pentamerous  
pentamerous  
pentamerous  
pentamerous  
pentamerous  
pentamerous

Magnoliidae

Monocotyledonae

Commelinidae

Eudicotyledonae

Superrosidae

Rosidae

Malvidae

Fabidae

Campanulidae

Lamiidae

Asteridae

Superasteridae

Pentapetalae

Commelinidae

Eudicotyledonae

Monocotyledonae

Magnoliidae

Mesangiospermae

Angiospermae

ML ancestral state reconstruction using rayDISC (R:corHMM)  
232\_A. Perianth merism (4-state) (D2c), SYMeq model

● dimerous  
● trimerous  
● tetramerous  
● pentamerous

| Model    | LogL    | Npar | AIC    | AICc   | DeltaAIC | DeltaAICc | Prob   |
|----------|---------|------|--------|--------|----------|-----------|--------|
| ARD      | -320.86 | 12   | 665.72 | 665.72 | 6.74     | 6.74      | 0.999  |
| ARDeq    | -319.73 | 12   | 663.48 | 663.48 | 4.99     | 4.99      | 0.999  |
| ER       | -359.5  | 1    | 721.81 | 721.81 | 16.09    | 16.09     | 0.001  |
| SYM      | -324.91 | 6    | 661.81 | 661.81 | 2.55     | 2.55      | 0.999  |
| SYMeq**  | -323.63 | 6    | 659.27 | 659.27 | 0.99     | 0.99      | 0.999  |
| ORD      | -335.27 | 6    | 682.53 | 682.53 | 23.22    | 23.22     | 0.999  |
| ORDeq    | -334.85 | 6    | 681.71 | 681.81 | 22.44    | 0         | 0.999  |
| ORDSYM   | -343.28 | 3    | 692.56 | 692.59 | 33.21    | 0         | 0.0019 |
| ORDSYMeq | -342.13 | 3    | 690.25 | 690.28 | 30.91    | 0         | 0.0019 |
| ORDER    | -344.83 | 1    | 691.66 | 691.66 | 32.29    | 0         | 0.0023 |

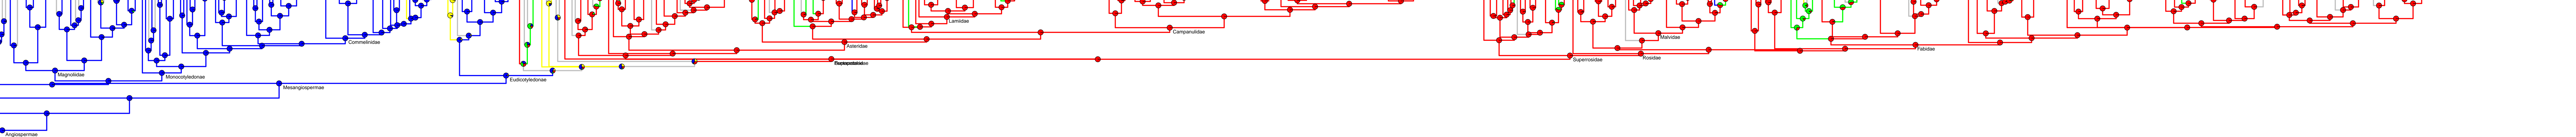



ML ancestral state reconstruction using rayDISC (R:corHMM)  
232\_B. Perianth merism (3-state) (D2c), SYMeq model

● trimerous  
● tetramerous  
● pentamerous

| Node            | ML state    | Prob   |
|-----------------|-------------|--------|
| Angiospermae    | trimerous   | 1      |
| Mesangiospermae | trimerous   | 1      |
| Magnoliidae     | trimerous   | 0.9999 |
| Monocotyledonae | trimerous   | 1      |
| Eudicotyledonae | trimerous   | 0.9728 |
| Commelinidae    | trimerous   | 1      |
| Pentapetalae    | pentamerous | 0.9997 |
| Superasteridae  | pentamerous | 0.9997 |

| Model    | LogL    | Npar | AIC    | AICc   | DeltaAIC | DeltaAICc | Bayes factor |
|----------|---------|------|--------|--------|----------|-----------|--------------|
| ARD      | -255.06 | 6    | 522.11 | 522.11 | 0.00     | 0.00      | 1.00         |
| ARDeq    | -254.14 | 6    | 520.59 | 520.59 | 1.52     | 1.52      | 0.12         |
| ER       | -280.33 | 1    | 562.08 | 562.08 | 40.00    | 40.00     | <0.001       |
| SYM      | -256.14 | 3    | 518.28 | 518.28 | 3.92     | 3.92      | 0.0001       |
| SYMeq*   | -255.11 | 3    | 516.22 | 516.22 | 1.96     | 1.96      | 0.0001       |
| ORD      | -255.36 | 4    | 518.73 | 518.73 | 3.62     | 3.62      | 0.0001       |
| ORDeq    | -254.47 | 4    | 516.94 | 516.94 | 1.83     | 1.83      | 0.0001       |
| ORDSYM   | -258.31 | 2    | 520.61 | 520.63 | 4.38     | 0.04      | 0.0014       |
| ORDSYMeq | -257.3  | 2    | 518.6  | 518.61 | 2.37     | 0.1       | 0.0014       |
| ORDER    | -260.61 | 1    | 523.22 | 523.23 | 6.98     | 0.01      | 0.0022       |

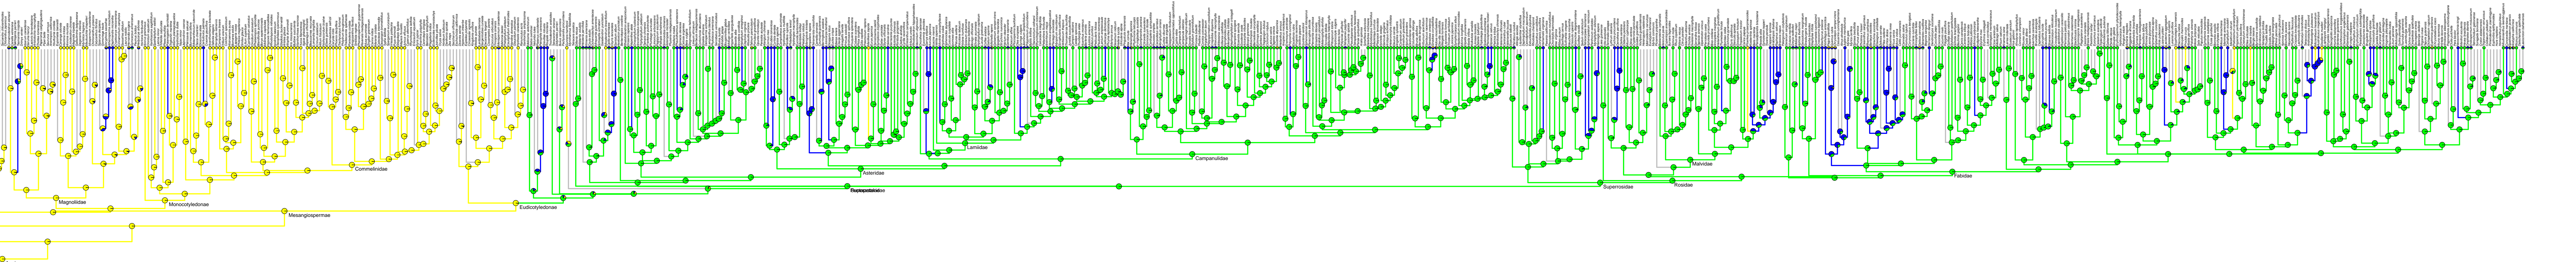



ML ancestral state reconstruction using rayDISC (R:corHMM)  
234\_A. Perianth differentiation (binary) (D2d), ARDeq model

|                    | Node          | ML state         | Prob   |
|--------------------|---------------|------------------|--------|
| ● undifferentiated | Angiospermae  | undifferentiated | 1      |
| ● differentiated   | Magnoliopsida | differentiated   | 0.9999 |

| Model   | LogL    | Npar | AIC    | AICc   | BayesAICc | differen- | rated  | 10.9981 |
|---------|---------|------|--------|--------|-----------|-----------|--------|---------|
| ARD     | -200.06 | 2    | 404.12 | 404.12 | 32        | 0         | 0.0000 | 0.0655  |
| ARDeg** | -199.4  | 2    | 402.8  | 402.82 | 0         | 0.66      | 0.0043 | 0.0014  |
| ER      | -209.3  | 1    | 420.59 | 420.6  | 17.78     | 0         | 0.0024 | 0.0024  |
| UNI01   | -228.15 | 1    | 458.29 | 458.3  | 55.48     | 0         | 0.0081 |         |
| UNI10   | -234.54 | 1    | 471.09 | 471.09 | 68.28     | 0         |        | 0.0032  |

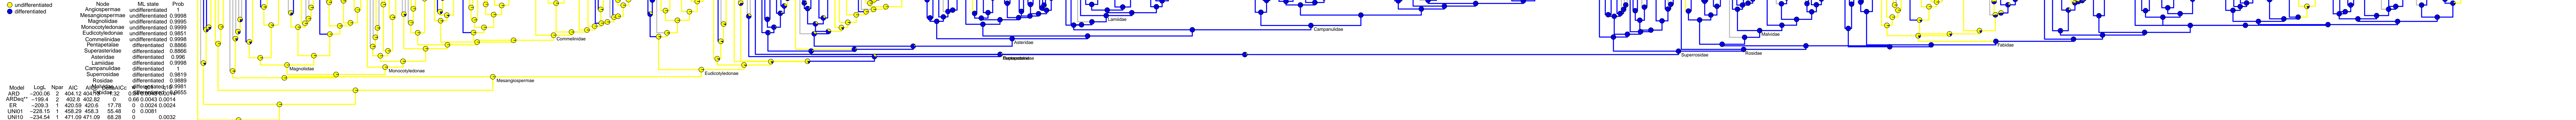

MP ancestral state reconstruction using ancestral.pars  
(R:phangorn)  
204\_A. Fusion of perianth (D2c), 76 steps

● free (<5%)  
● fused (>5%)

Node  
Angiospermae  
Mesangiospermae  
Magnoliidae  
Monocotyledonae  
Eudicotyledonae  
Commelinidae  
Pentapetalae  
Superasteridae  
Asteridae  
Lamiidae  
Campanulidae  
Superrosidae  
Rosidae  
Malvidae  
Fabidae

MP state(s)  
free (<5%)  
free (<5%) / fused (>5%)  
fused (>5%)  
free (<5%)  
free (<5%)  
free (<5%)  
free (<5%)

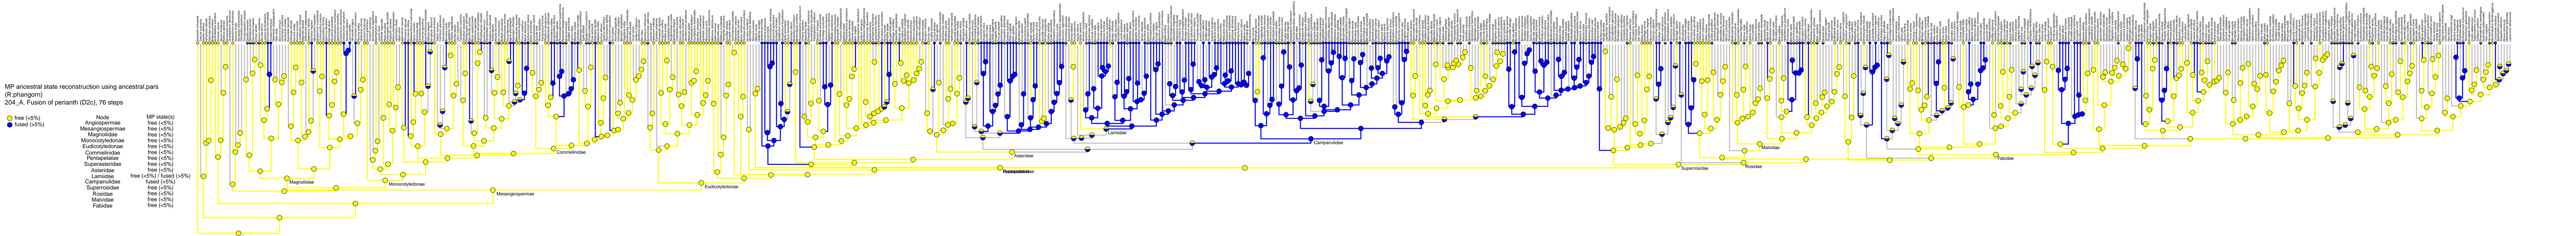

ML ancestral state reconstruction using rayDISC (R:corHMM)  
204\_A. Fusion of perianth (D2c), ER model

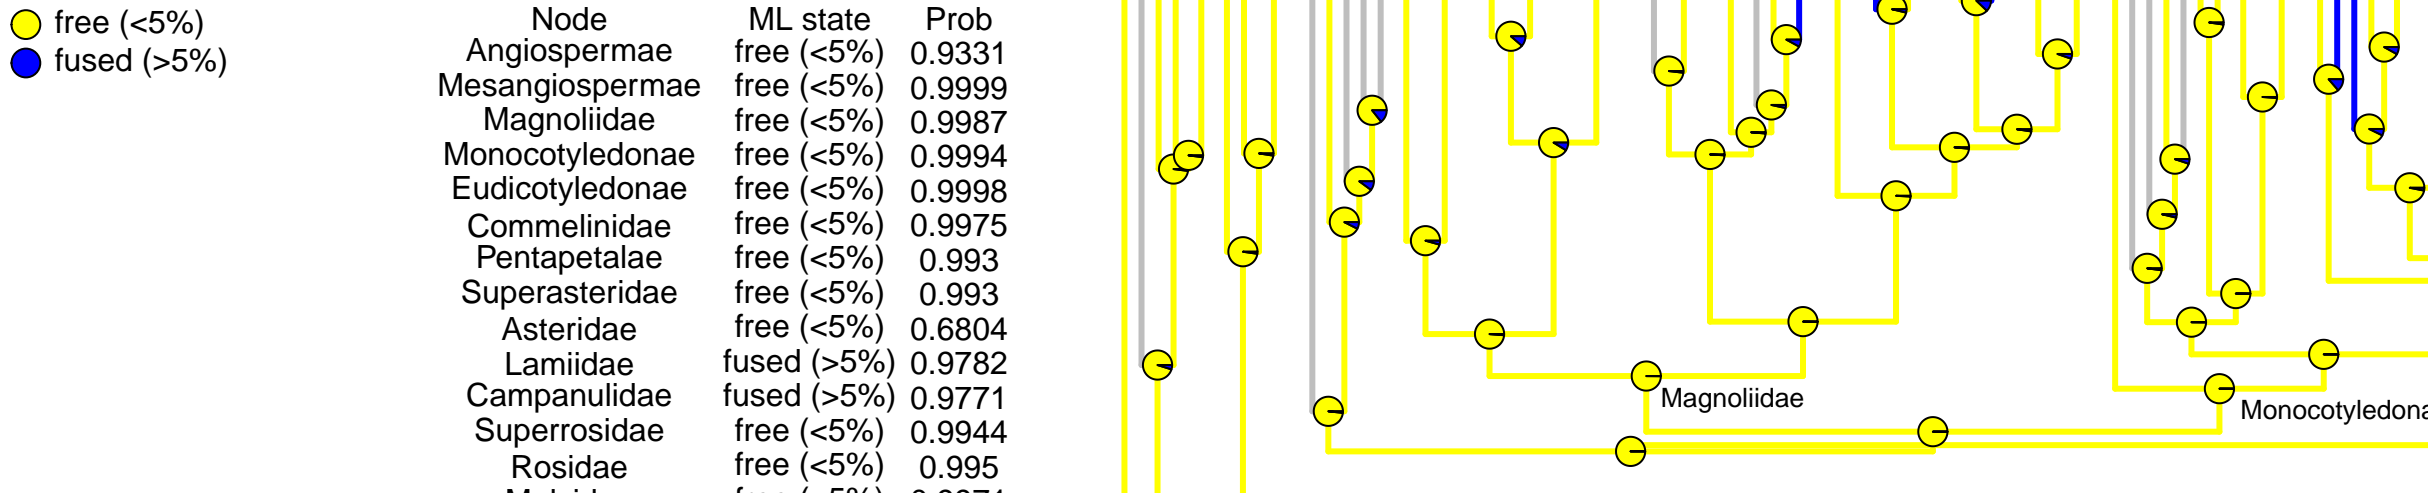

| Model | LogL    | Npar | AIC    | AICc   | ΔAICc | Weight | Prob   |
|-------|---------|------|--------|--------|-------|--------|--------|
| ARD   | -225.17 | 2    | 455.51 | 455.52 | 0.01  | 0.9971 | 0.9993 |
| ARD   | -225.75 | 2    | 454.34 | 454.35 | 0.48  | 0.35   | 0.0041 |
| ER*   | -225.93 | 1    | 453.87 | 453.87 | 0     | 0.45   | 0.004  |
| UNI01 | -239.31 | 1    | 480.61 | 480.62 | 26.74 | 0      | 0.0045 |
| UNI10 | -237.05 | 1    | 476.1  | 476.11 | 22.23 | 0      | 0.0076 |

| Node            | ML state    | Prob   |
|-----------------|-------------|--------|
| Angiospermae    | free (<5%)  | 0.9331 |
| Mesangiospermae | free (<5%)  | 0.9999 |
| Magnoliidae     | free (<5%)  | 0.9987 |
| Monocotyledonae | free (<5%)  | 0.9994 |
| Eudicotyledonae | free (<5%)  | 0.9998 |
| Comelinidae     | free (<5%)  | 0.9975 |
| Pentapetalae    | free (<5%)  | 0.993  |
| Superasteridae  | free (<5%)  | 0.993  |
| Asteridae       | free (<5%)  | 0.6804 |
| Lamiales        | fused (>5%) | 0.9782 |
| Campanulidae    | fused (>5%) | 0.9771 |
| Superrosidae    | free (<5%)  | 0.9944 |
| Rosidae         | free (<5%)  | 0.995  |

| Model | LogL    | Npar | AIC    | AICc   | ΔAICc | Weight | Prob   |
|-------|---------|------|--------|--------|-------|--------|--------|
| ARD   | -225.17 | 2    | 455.51 | 455.52 | 0.01  | 0.9971 | 0.9993 |
| ARD   | -225.75 | 2    | 454.34 | 454.35 | 0.48  | 0.35   | 0.0041 |
| ER*   | -225.93 | 1    | 453.87 | 453.87 | 0     | 0.45   | 0.004  |
| UNI01 | -239.31 | 1    | 480.61 | 480.62 | 26.74 | 0      | 0.0045 |
| UNI10 | -237.05 | 1    | 476.1  | 476.11 | 22.23 | 0      | 0.0076 |

MP ancestral state reconstruction using ancestral.pars  
(R:phangorn)  
207\_A. Symmetry of perianth (binary) (D2d), 55 steps

● actinomorphic  
● zygomorphic

| Node            | MP state(s)   |
|-----------------|---------------|
| Angiospermae    | actinomorphic |
| Mesangiospermae | actinomorphic |
| Magnoliidae     | actinomorphic |
| Monocotyledonae | actinomorphic |
| Eudicotyledonae | actinomorphic |
| Commelinidae    | actinomorphic |
| Pentapetalae    | actinomorphic |
| Superasteridae  | actinomorphic |
| Asteridae       | actinomorphic |
| Lamiidae        | actinomorphic |
| Campanulidae    | actinomorphic |
| Superrosidae    | actinomorphic |
| Rosidae         | actinomorphic |
| Malvidae        | actinomorphic |
| Fabidae         | actinomorphic |

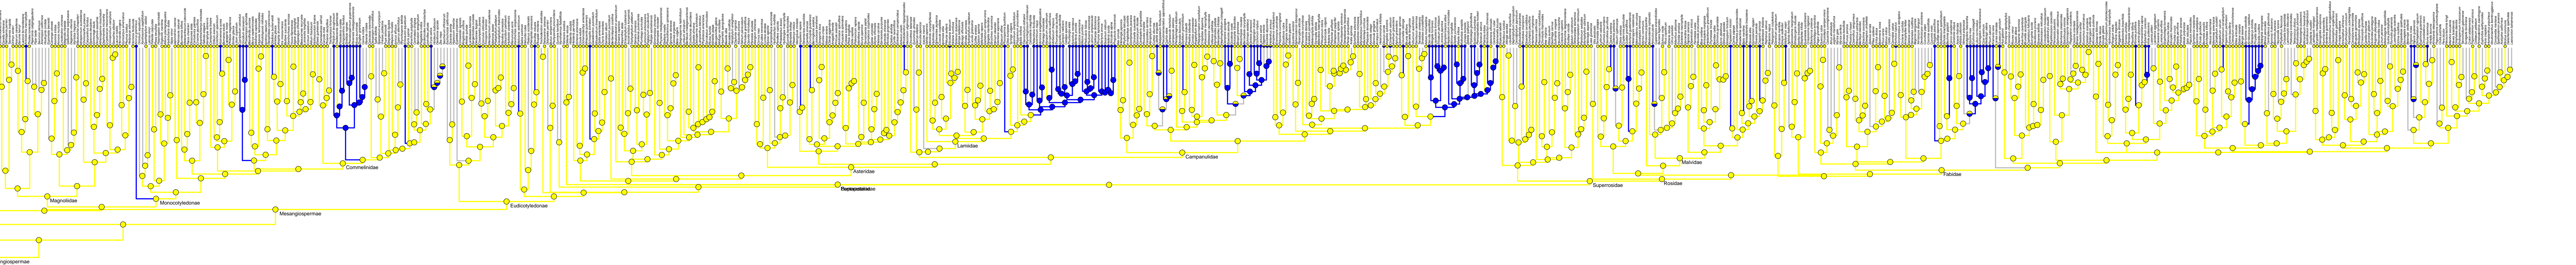

ML ancestral state reconstruction using rayDISC (R:corHMM)

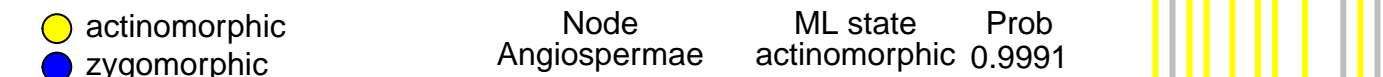

|                 | Node            | ML state      | Prob   |
|-----------------|-----------------|---------------|--------|
| ● actinomorphic | Angiospermae    | actinomorphic | 0.9991 |
| ● zygomorphic   | Mesangiospermae | actinomorphic | 1      |
|                 | Magnoliadae     | actinomorphic | 0.9998 |
|                 | Monocotyledonae | actinomorphic | 0.9981 |
|                 | Eudicotyledonae | actinomorphic | 0.9998 |
|                 | Commelinidae    | actinomorphic | 0.9979 |
|                 | Pentapetalae    | actinomorphic | 1      |
|                 | Superasteridae  | actinomorphic | 1      |
|                 | Asteridae       | actinomorphic | 1      |
|                 | Lamiidae        | actinomorphic | 0.9982 |
|                 | Campanulidae    | actinomorphic | 0.9999 |
|                 | Superrosidae    | actinomorphic | 1      |

| Model   | LogL    | Npar | AIC    | AICc   | Maldev | Bayes  | AICc   | aginom | morphic | 0.0997 |
|---------|---------|------|--------|--------|--------|--------|--------|--------|---------|--------|
| ARD     | -209.93 | 2    | 423.87 | 423.87 | 0.03   | 0.0001 | 0.0001 | 0.0001 | 0.0001  | 0.0001 |
| ARDeq** | -209.92 | 2    | 422.84 | 422.86 | 0      | 0.63   | 0.0012 | 0.0053 | 0.0053  | 0.0053 |
| ER      | -217.33 | 1    | 436.66 | 436.66 | 13.81  | 0      | 0.0015 | 0.0015 | 0.0015  | 0.0015 |
| UNI01   | -261.66 | 1    | 525.32 | 525.33 | 102.47 | 0      | 0.0018 |        |         |        |
| UNI10   | -219.78 | 1    | 441.57 | 441.57 | 18.72  | 0      |        | 0.0152 |         |        |

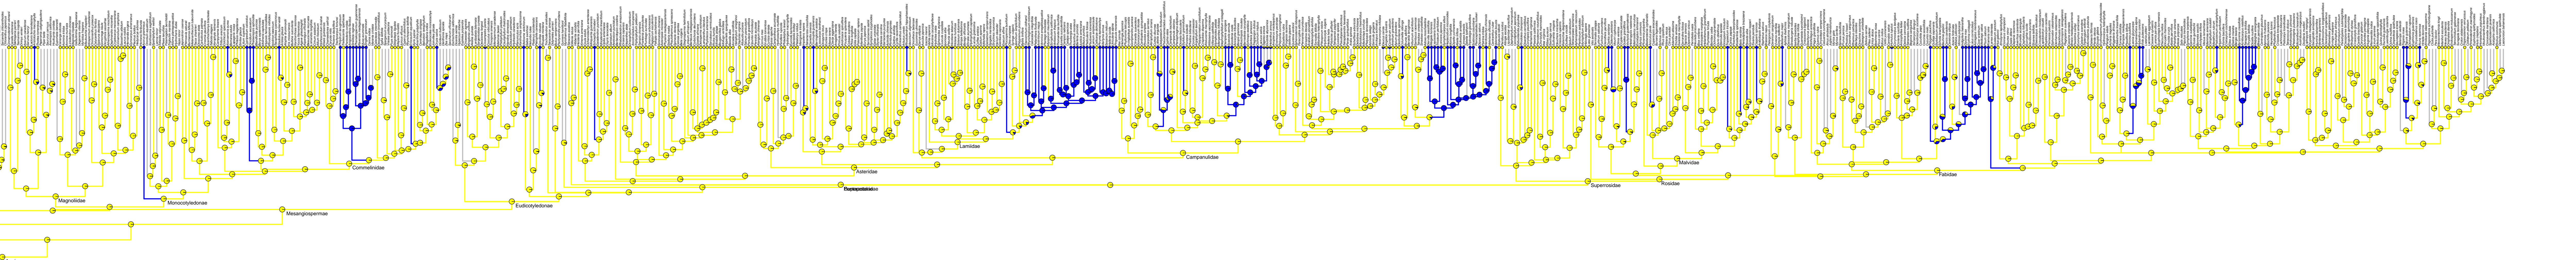

MP ancestral state reconstruction using ancestral.pars  
(R:phangorn)  
301\_B. Number of fertile stamens (3-state) (D2c), 156 steps

● one to five (1–5)      Node  
● six to ten (6–10)      Angiospermae  
● more than ten (>10)      Mesangiospermae

MP state(s)  
more than ten (>10)  
one to five (1–5) / six to ten (6–10)

| Family          | Number of species                            |
|-----------------|----------------------------------------------|
| Monocotyledonae | six to ten (6–10)                            |
| Eudicotyledonae | one to five (1–5) / six to ten (6–10)        |
| Commelinidae    | six to ten (6–10)                            |
| Pentapetalae    | one to five (1–5) / six to ten (6–10) / more |
| Superasteridae  | one to five (1–5) / six to ten (6–10) / more |
| Asteridae       | one to five (1–5) / six to ten (6–10)        |
| Lamiidae        | one to five (1–5)                            |
| Campanulidae    | one to five (1–5)                            |
| Superrosidae    | six to ten (6–10)                            |
| Rosidae         | six to ten (6–10)                            |
| Malvidae        | six to ten (6–10)                            |
| Fabidae         | six to ten (6–10)                            |

Figure 1. Schematic diagram of the experimental setup. The subject is seated in a chair and views the screen through a mirror. The screen displays the target (a red dot) and the starting position (a green dot). The subject's hand is positioned at the starting position. The subject is instructed to move the hand to the target position. The distance between the starting position and the target is 10 cm. The subject is instructed to move the hand to the target position as quickly and accurately as possible. The subject is instructed to move the hand to the target position as quickly and accurately as possible. The subject is instructed to move the hand to the target position as quickly and accurately as possible.

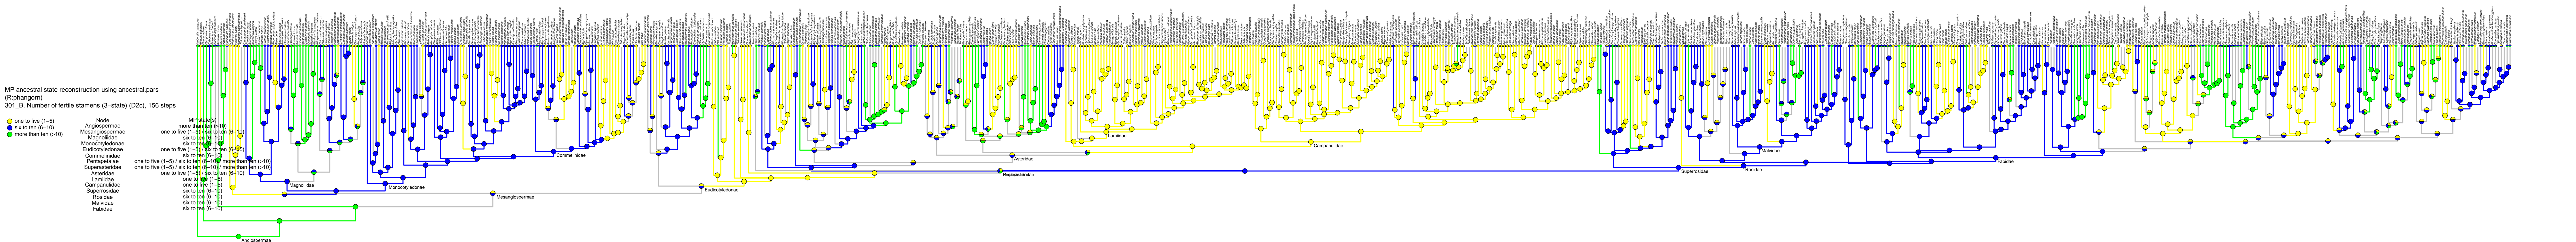













ML ancestral state reconstruction using rayDISC (R:corHMM)  
331\_A. Number of androecium structural whorls (3–state) (D2c), ORDeq model

● one (1)  
● two (2)  
● more than two (>2)

| Model   | LogL    | Npar | AIC    | AICc   | ΔAIC  | ΔAICc | w      | prob   |
|---------|---------|------|--------|--------|-------|-------|--------|--------|
| ARD     | -231.92 | 6    | 475.83 | 475.83 | 2.64  | 2.64  | 0.19   | 0.9985 |
| ARDeq   | -230.86 | 6    | 473.79 | 473.79 | 0.52  | 0.52  | 0.39   | 0.9912 |
| ER      | -279.95 | 1    | 561.05 | 561.05 | 88.61 | 88.61 | 0.0000 | 0.9981 |
| SYM     | -254.19 | 3    | 514.38 | 514.38 | 41.11 | 41.11 | 0.0000 | 0.999  |
| SYMq    | -253.53 | 3    | 513.05 | 513.05 | 39.78 | 39.78 | 0.0000 | 0.9996 |
| ORD     | -233.68 | 4    | 475.36 | 475.36 | 2.11  | 2.11  | 0.19   | 1      |
| ORDeq*  | -232.62 | 4    | 473.25 | 473.3  | 0     | 0     | 0.42   | 0      |
| ORDSYM  | -255.31 | 2    | 514.61 | 514.63 | 41.33 | 41.33 | 0      | 0.0034 |
| ORDSYMq | -254.58 | 2    | 513.16 | 513.17 | 39.87 | 39.87 | 0      | 0.0034 |
| ORDER   | -260.61 | 1    | 523.22 | 523.22 | 49.92 | 49.92 | 0      | 0.0028 |

| Node            | ML state           | Prob   |
|-----------------|--------------------|--------|
| Angiospermae    | more than two (>2) | 1      |
| Mesangiospermae | more than two (>2) | 0.9916 |
| Magnoliidae     | more than two (>2) | 0.9928 |
| Monocotyledonae | more than two (>2) | 0.9342 |
| Eudicotyledonae | more than two (>2) | 0.9035 |
| Commelinidae    | two (2)            | 0.9803 |
| Pentapetalae    | two (2)            | 0.9893 |
| Superasteridae  | two (2)            | 0.9893 |

| Node         | ML state           | Prob   |
|--------------|--------------------|--------|
| Angiospermae | one (1)            | 0.9999 |
| Angiospermae | two (2)            | 0.9985 |
| Angiospermae | more than two (>2) | 0.9912 |
| Angiospermae | one (1)            | 0.9981 |
| Angiospermae | two (2)            | 0.999  |
| Angiospermae | more than two (>2) | 0.9996 |
| Angiospermae | one (1)            | 1      |
| Angiospermae | two (2)            | 0      |
| Angiospermae | more than two (>2) | 0      |
| Angiospermae | one (1)            | 0      |
| Angiospermae | two (2)            | 0      |
| Angiospermae | more than two (>2) | 0      |

Angiospermae



ML ancestral state reconstruction using rayDISC (R:corHMM)  
332\_A. Androecium structural merism (4-state) (D2c), SYMEq model

● dimerous  
● trimerous  
● tetramerous  
● pentamerous

| Model   | LogL    | Npar | Asymptotic  | ARD        | ARDeq      | ER    | SYM    | SYMEq** | ORD    | ORDeq | ORDSYM | ORDSYMq |
|---------|---------|------|-------------|------------|------------|-------|--------|---------|--------|-------|--------|---------|
| ARD     | -222.17 | 12   | 4891.9999   | 0.01       | 0.0073     | 0.01  | 0.0064 | 0.01    | 0.0073 | 0.01  | 0.0064 | 0.01    |
| ARDeq   | -221.32 | 12   | 4891.9999   | 0.01       | 0.0064     | 0.01  | 0.0064 | 0.01    | 0.0064 | 0.01  | 0.0064 | 0.01    |
| ER      | -237.54 | 1    | 4891.9999   | 0.01       | 0.0064     | 0.01  | 0.0064 | 0.01    | 0.0064 | 0.01  | 0.0064 | 0.01    |
| SYM     | -223.59 | 6    | 4891.9999   | 0.01       | 0.0064     | 0.01  | 0.0064 | 0.01    | 0.0064 | 0.01  | 0.0064 | 0.01    |
| SYMEq** | -223.41 | 6    | 4891.9999   | 0.01       | 0.0064     | 0.01  | 0.0064 | 0.01    | 0.0064 | 0.01  | 0.0064 | 0.01    |
| ORD     | -1e+06  | 6    | 2000002.1   | 1999553.18 | 0          | 9e-04 | ...    | ...     | ...    | ...   | ...    | ...     |
| ORDeq   | -1e+06  | 6    | 2000002.1   | 1999553.18 | 0          | 9e-04 | ...    | ...     | ...    | ...   | ...    | ...     |
| ORDSYM  | -1e+06  | 3    | 20000006.03 | 1999547.1  | 0          | 9e-04 | ...    | ...     | ...    | ...   | ...    | ...     |
| ORDSYMq | -1e+06  | 3    | 20000006.03 | 1999547.1  | 0          | 9e-04 | ...    | ...     | ...    | ...   | ...    | ...     |
| ORDER   | -1e+06  | 1    | 20000002    | 2000002.01 | 1999543.08 | 0     | 9e-04  | ...     | ...    | ...   | ...    | ...     |

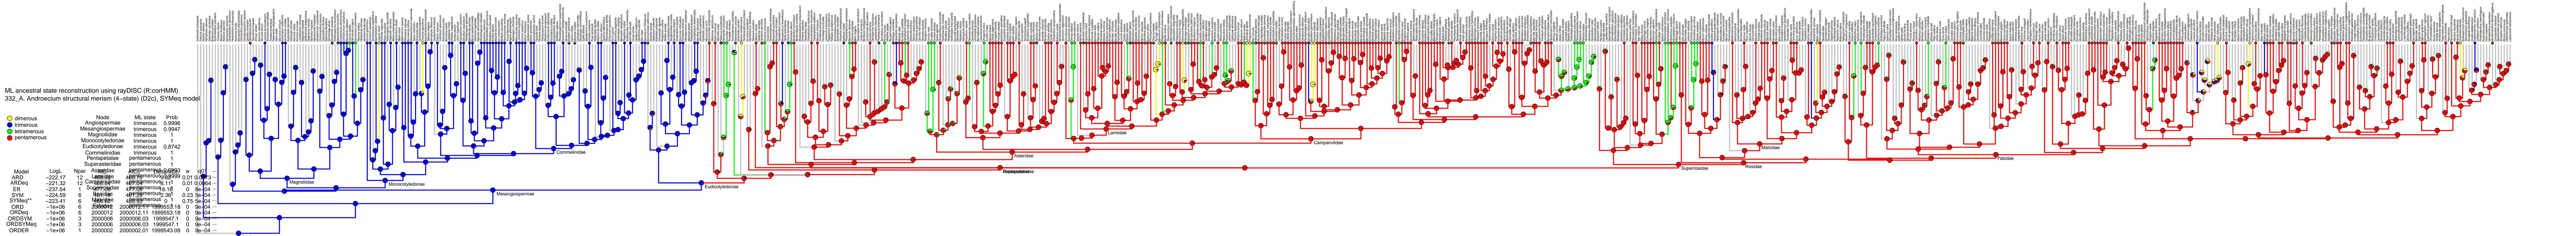



ML ancestral state reconstruction using rayDISC (R:corHMM)  
332\_B. Androecium structural merism (3-state) (D2c), ARDeq model

● trimerous  
● tetramerous  
● pentamerous

| Model    | LogL    | Npar | AIC    | AICc   | DeltaAIC | DeltaAICc | Bayes factor |
|----------|---------|------|--------|--------|----------|-----------|--------------|
| ARD      | -171.34 | 6    | 354.69 | 354.69 | 0        | 0         | 0.9839       |
| ARDeq**  | -170.34 | 6    | 352.69 | 352.69 | 0        | 0         | 0.989        |
| ER       | -185.92 | 1    | 373.39 | 373.39 | 21.05    | 21.05     | 0.9997       |
| SYM      | -176.7  | 3    | 359.39 | 359.39 | 6.63     | 6.63      | 0.9975       |
| SYMeq    | -175.77 | 3    | 357.54 | 357.54 | 4.77     | 4.77      | 0.9989       |
| ORD      | -178.11 | 4    | 364.21 | 364.21 | 11.47    | 11.47     | 0.9084       |
| ORDeq    | -177.63 | 4    | 363.26 | 363.32 | 10.52    | 0         | 4e-04 ...    |
| ORDSYM   | -185.37 | 2    | 374.74 | 374.75 | 21.96    | 0         | 0.0019 ...   |
| ORDSYMeq | -184.59 | 2    | 373.17 | 373.19 | 20.39    | 0         | 0.0018 ...   |
| ORDER    | -186.18 | 1    | 374.37 | 374.37 | 21.58    | 0         | 0.0026 ...   |

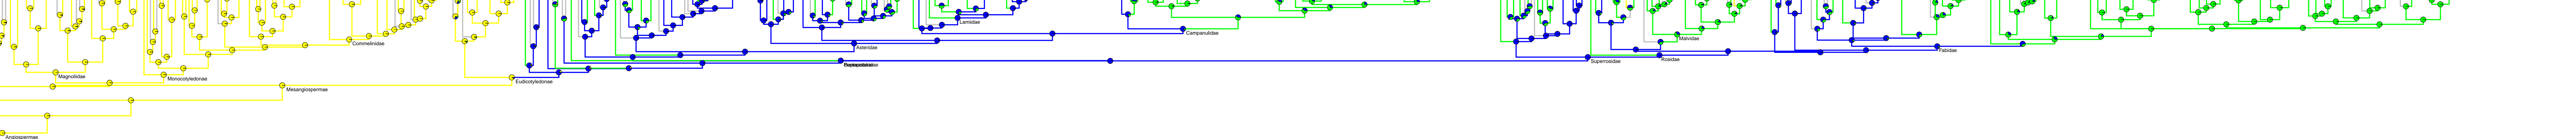



05\_A. Filament (binary) (D2d), ARdeg model

| Node            | ML state       | Prob   |
|-----------------|----------------|--------|
| Angiospermae    | laminar (wide) | 0.9954 |
| Mesangiospermae | laminar (wide) | 0.8659 |

Eudicotyledonae  
 Magnoliidae (wide) 0.5375  
 typical (narrow) 0.8082  
 Commelinidae typical (narrow) 0.7232  
 Pentapetalae typical (narrow) 0.9989  
 Superasteridae typical (narrow) 0.9989  
 Asteridae typical (narrow) 0.9995  
 Lamiales typical (narrow) 0.9986  
 Campanulidae typical (narrow) 0.9934  
 Superrosidae typical (narrow) 0.9995  
 Magnoliidae  
 Monocotyledonae

| Model    | LogL    | Npar | AIC    | AIC <sub>Malvinas</sub> | AIC <sub>Canarias</sub> | AIC <sub>Canarias</sub> | typical error | 95% CI |
|----------|---------|------|--------|-------------------------|-------------------------|-------------------------|---------------|--------|
| ARD      | -173.1  | 2    | 350.2  | 350.2                   | 349.79                  | 0.41                    | 0.0095        | 0.0021 |
| ARDdeq** | -172.7  | 2    | 349.4  | 349.42                  | 0                       | 0.59                    | 0.0077        | 0.0021 |
| ER       | -178.42 | 1    | 358.83 | 358.84                  | 9.42                    | 0.01                    | 0.0023        | 0.0023 |
| UNI01    | -189.11 | 1    | 380.22 | 380.23                  | 30.81                   | 0                       | 0.0134        |        |
| UNI10    | -189.85 | 1    | 381.69 | 381.7                   | 32.28                   | 0                       | 0.0022        |        |

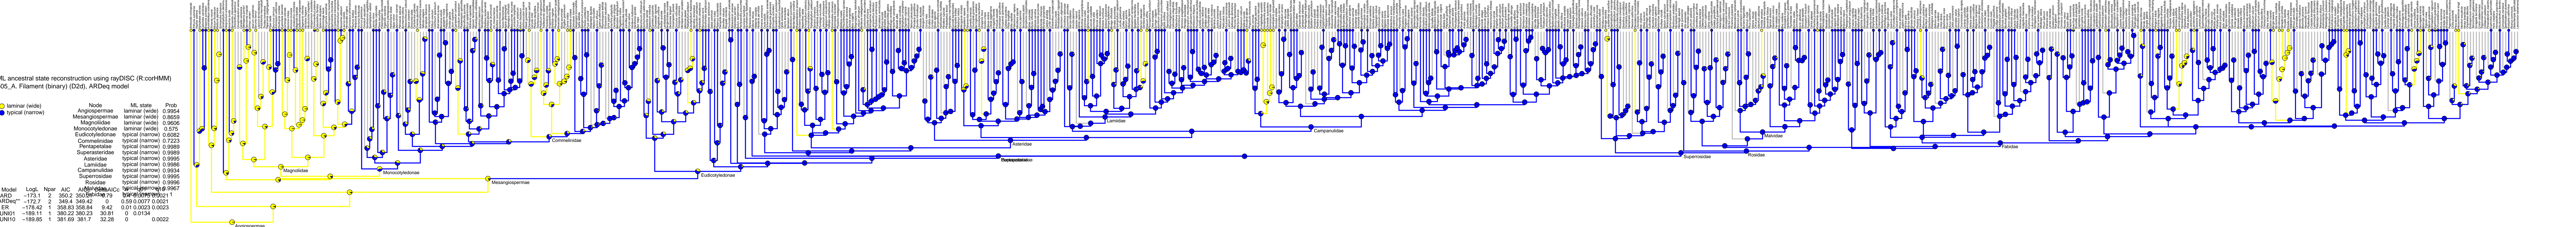

MP ancestral state reconstruction using ancestral.pars  
(R:phangorn)  
311\_A. Anther orientation (D2d), 109 steps

- introrse
- latrorse
- extrorse

| Node            | MP state(s)         |
|-----------------|---------------------|
| Angiospermae    | introrse            |
| Mesangiospermae | introrse / extrorse |
| Magnoliidae     | extrorse            |
| Monocotyledonae | introrse            |
| Eudicotyledonae | introrse / extrorse |
| Commelinidae    | introrse            |
| Pentapetalae    | introrse / latrorse |
| Superasteridae  | introrse / latrorse |
| Asteridae       | introrse            |
| Lamiidae        | introrse            |
| Campanulidae    | introrse            |
| Superosidae     | introrse            |
| Rosidae         | introrse            |
| Malvidae        | introrse            |
| Fabidae         | introrse            |

| Node            | MP state(s)         |
|-----------------|---------------------|
| Angiospermae    | introrse            |
| Mesangiospermae | introrse / extrorse |
| Magnoliidae     | extrorse            |
| Monocotyledonae | introrse            |
| Eudicotyledonae | introrse / extrorse |
| Commelinidae    | introrse            |
| Pentapetalae    | introrse / latrorse |
| Superasteridae  | introrse / latrorse |
| Asteridae       | introrse            |
| Lamiidae        | introrse            |
| Campanulidae    | introrse            |
| Superosidae     | introrse            |
| Rosidae         | introrse            |
| Malvidae        | introrse            |
| Fabidae         | introrse            |

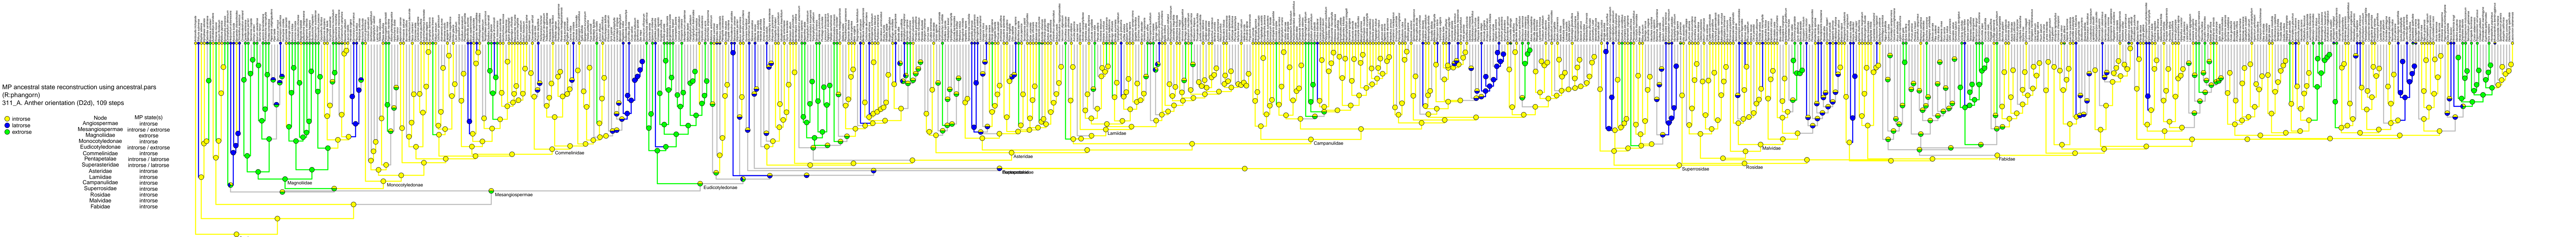



MP ancestral state reconstruction using ancestral.pars  
(R:phangorn)  
312\_A. Anther attachment (binary) (D2d), 98 steps

● basifixed  
● dorsifixed

Node  
Angiospermae  
Mesangiospermae  
Magnoliidae  
Monocotyledonae  
Eudicotyledonae  
Commelinidae  
Pentapetalae  
Superasteridae  
Asteridae  
Lamiidae  
Campanulidae  
Superrosidae  
Rosidae  
Malvidae  
Fabidae

MP state(s)  
basifixed  
basifixed / dorsifixed  
basifixed  
dorsifixed  
dorsifixed  
dorsifixed

Magnoliidae

Monocotyledonae

Commelinidae

Eudicotyledonae

Mesangiospermae

Lamiidae

Campanulidae

Superrosidae

Rosidae

Malvidae

Fabidae

Angiospermae

Magnoliidae

Monocotyledonae

Commelinidae

Eudicotyledonae

Mesangiospermae

Lamiidae

Campanulidae

Superrosidae

Rosidae

Malvidae

Fabidae

Angiospermae

Magnoliidae

Monocotyledonae

Commelinidae

Eudicotyledonae

Mesangiospermae

Lamiidae

Campanulidae

Superrosidae

Rosidae

Malvidae

Fabidae

Angiospermae

Magnoliidae

Monocotyledonae

Commelinidae

Eudicotyledonae

Mesangiospermae

Lamiidae

Campanulidae

Superrosidae

Rosidae

Malvidae

Fabidae

Angiospermae

Magnoliidae

Monocotyledonae

Magnoliidae

Monocotyledonae

Commelinidae

Eudicotyledonae

Mesangiospermae

Lamiidae

Campanulidae

Superrosidae

Rosidae

Malvidae

Fabidae

Angiospermae

Magnoliidae

Monocotyledonae

Commelinidae

Eudicotyledonae

Mesangiospermae

Lamiidae

Campanulidae

Superrosidae

Rosidae

Malvidae

Fabidae

Angiospermae

Magnoliidae

Monocotyledonae

Commelinidae

Eudicotyledonae

Mesangiospermae

Lamiidae

Campanulidae

Superrosidae

Rosidae

Malvidae

Fabidae

Angiospermae

Magnoliidae

Monocotyledonae

Commelinidae

Eudicotyledonae

Mesangiospermae

Lamiidae

Campanulidae

Superrosidae

Rosidae

Malvidae

Fabidae

Angiospermae

Magnoliidae

Monocotyledonae

ML ancestral state reconstruction using rayDISC (R:corHMM)  
312\_A. Anther attachment (binary) (D2t), ARDeq model

● basifixed  
● dorsifixed

Node ML state Prob

Angiospermae basifixed 0.9811

Mesangiospermae basifixed 0.9548

Magnoliidae basifixed 0.9737

Monocotyledonae basifixed 0.9514

Eudicotyledonae basifixed 0.7772

Commelinidae basifixed 0.953

Pentapetalae dorsifixed 0.9184

Superasteridae dorsifixed 0.9184

Asteridae dorsifixed 0.9073

Lamiidae dorsifixed 0.6674

Campanulidae dorsifixed 0.9732

Superrosidae dorsifixed 0.9312

Rosidae dorsifixed 0.9626

| Model   | LogL    | Npar | AIC    | AICc   | ΔAIC  | ΔAICc | Bayes  | OR     | OR95%  |
|---------|---------|------|--------|--------|-------|-------|--------|--------|--------|
| ARD     | -264.58 | 2    | 533.16 | 533.16 | 0     | 0     | 0.999  | 0.999  | 0.999  |
| ARDeq** | -264.29 | 2    | 532.57 | 532.59 | 0     | 0     | 0.52   | 0.004  | 0.0073 |
| ER      | -266.96 | 1    | 535.92 | 535.92 | 3.33  | 0.1   | 0.0053 | 0.0053 |        |
| UNI01   | -295.76 | 1    | 593.52 | 593.52 | 60.93 | 0     | 0.0057 |        |        |
| UNI10   | -274.75 | 1    | 551.51 | 551.51 | 18.92 | 0     | 0.0075 |        |        |

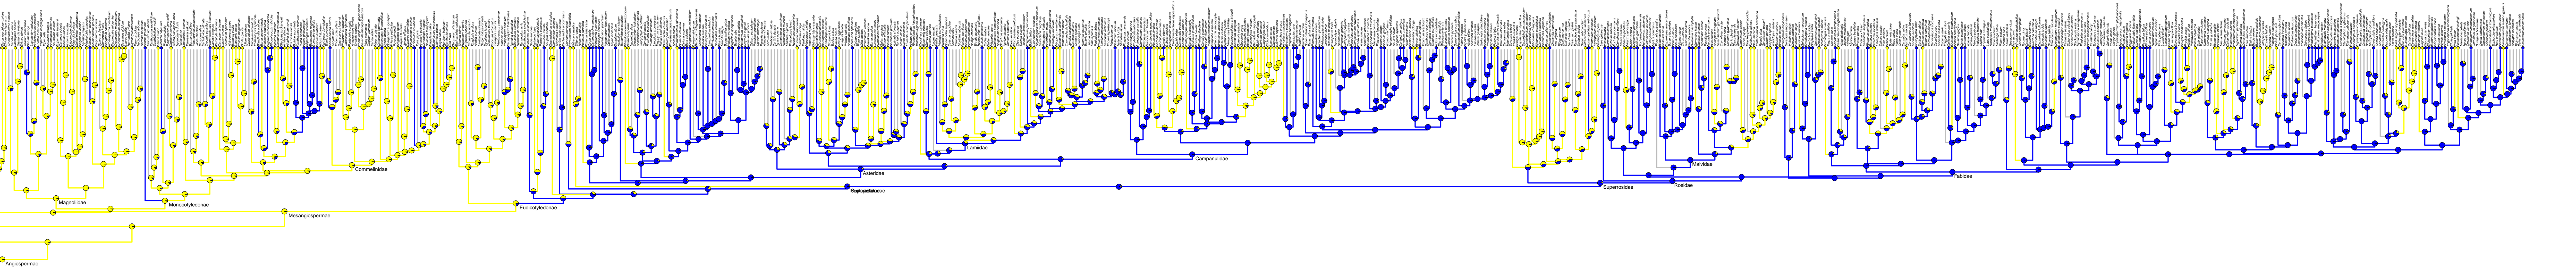



ML ancestral state reconstruction using rayDISC (R:corHMM)  
313\_A. Anther dehiscence (3-state) (D2d), ARDeq model

● longitudinal slit  
● H-valvate  
● flap-valvate

| Node            | ML state          | Prob   |
|-----------------|-------------------|--------|
| Angiospermae    | longitudinal slit | 1      |
| Mesangiospermae | longitudinal slit | 1      |
| Magnoliidae     | longitudinal slit | 0.9914 |
| Monocotyledonae | longitudinal slit | 1      |
| Eudicotyledonae | longitudinal slit | 1      |
| Commelinidae    | longitudinal slit | 1      |
| Pentapetalae    | longitudinal slit | 1      |
| Superasteridae  | longitudinal slit | 1      |
| Asteridae       | longitudinal slit | 1      |
| Lamiidae        | longitudinal slit | 1      |
| Campanulidae    | longitudinal slit | 1      |
| Superrosidae    | longitudinal slit | 1      |
| Rosidae         | longitudinal slit | 1      |
| Angiospermae    | longitudinal slit | 1      |

| Model  | LogL   | Npar | AIC    | AICc   | Delta AICc | Weight         |
|--------|--------|------|--------|--------|------------|----------------|
| ARD    | -55.29 | 6    | 122.59 | 122.65 | 0.00       | 0.39 2e-04 ... |
| ARDeq* | -54.26 | 6    | 120.52 | 120.62 | 0          | 0.19 2e-04 ... |
| ER     | -60.04 | 1    | 122.08 | 122.09 | 1.46       | 0.19 2e-04 ... |
| SYM    | -59.03 | 3    | 124.05 | 124.08 | 3.46       | 0.07 2e-04 ... |
| SYMeq  | -57.93 | 3    | 121.85 | 121.89 | 1.26       | 0.21 2e-04 ... |

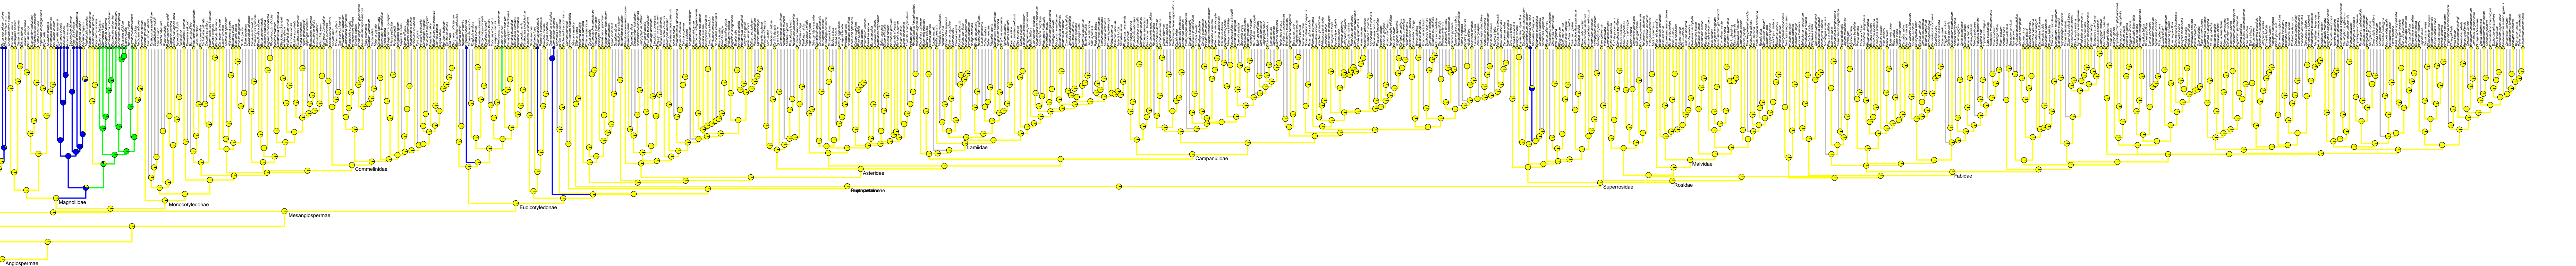



ML ancestral state reconstruction using rayDISC (R:corHMM)  
401\_B. Number of structural carpels (5–state) (D2c), ARDeq model

● one (1)  
● two (2)  
● three (3)  
● four or five (4–5)  
● more than five (>5)

| Model   | LogL    | Npar | AIC     | AstAIC  | DeltaAIC | Pr     | Pr     |
|---------|---------|------|---------|---------|----------|--------|--------|
| ARD     | -663.93 | 20   | 1367.87 | 1368.05 | 3.14     | 0.0016 | 0.9979 |
| ARD**   | -662.36 | 20   | 1364.80 | 1365.02 | 0        | 0.0016 | 0.9675 |
| ER      | -713.39 | 1    | 1428.99 | 1428.99 | 62.19    | 0.0016 | 0.9995 |
| SYM     | -681.59 | 10   | 1383.16 | 1383.36 | 17.29    | 0.0016 | 0.9995 |
| SYM*    | -680.38 | 10   | 1380.72 | 1380.94 | 15.22    | 0.0016 | 0.9981 |
| ORD     | -755.81 | 8    | 1527.62 | 1527.68 | 161.98   | 0.0016 | 0.9999 |
| ARDeq   | -754.85 | 8    | 1525.69 | 1525.88 | 160.06   | 0      | 0      |
| ORDSYM  | -760.05 | 4    | 1528.09 | 1528.14 | 162.33   | 0      | 0.0038 |
| ORDSYM* | -759.29 | 4    | 1526.57 | 1526.62 | 160.81   | 0      | 0.0038 |
| ORDER   | -765.96 | 1    | 1533.91 | 1533.92 | 168.1    | 0      | 0.0055 |

| Node            | ML state            | Prob   |
|-----------------|---------------------|--------|
| Angiospermae    | more than five (>5) | 1      |
| Mesangiospermae | more than five (>5) | 0.9999 |
| Magnoliidae     | more than five (>5) | 0.9998 |
| Monocotyledonae | more than five (>5) | 0.7232 |
| Eudicotyledonae | more than five (>5) | 0.9906 |
| Commelinidae    | three (3)           | 0.9999 |
| Pentapetalae    | four or five (4–5)  | 0.9998 |
| Superasteridae  | four or five (4–5)  | 0.9998 |

| Node            | ML state            | Prob   |
|-----------------|---------------------|--------|
| Angiospermae    | more than five (>5) | 0.9999 |
| Magnoliidae     | more than five (>5) | 0.9998 |
| Monocotyledonae | more than five (>5) | 0.7232 |
| Eudicotyledonae | more than five (>5) | 0.9906 |
| Commelinidae    | three (3)           | 0.9999 |
| Pentapetalae    | four or five (4–5)  | 0.9998 |
| Superasteridae  | four or five (4–5)  | 0.9998 |

Angiospermae



ML ancestral state reconstruction using rayDISC (R:corHMM)  
400\_A. Gynoecium phyllotaxy (D2d), ARDeq model

● whorled  
● spiral

| Node            | ML state | Prob   |
|-----------------|----------|--------|
| Angiospermae    | spiral   | 1      |
| Mesangiospermae | spiral   | 0.9999 |
| Magnoliidae     | spiral   | 0.9991 |
| Monocotyledonae | whorled  | 0.5674 |
| Eudicotyledonae | spiral   | 0.9992 |
| Commelinidae    | whorled  | 0.9999 |
| Pentapetalae    | whorled  | 0.9753 |
| Superasteridae  | whorled  | 0.9753 |
| Asteridae       | whorled  | 1      |
| Lamiidae        | whorled  | 1      |
| Campanulidae    | whorled  | 1      |
| Superrosidae    | whorled  | 0.9791 |
| Rosidae         | whorled  | 0.9792 |
| Malvaceae       | whorled  | 0.9791 |
| Fabidae         | whorled  | 0.9791 |

| Model  | LogL   | Npar | AIC   | AICc  | MAIC  | MAICc | MAICd  |
|--------|--------|------|-------|-------|-------|-------|--------|
| ARD    | -39.19 | 2    | 82.38 | 82.41 | 0     | 0.62  | 0.0069 |
| ARDq** | -38.5  | 2    | 80.99 | 81.01 | 0     | 0.62  | 1e-04  |
| ER     | -50.1  | 1    | 102   | 102   | 20.99 | 0     | 4e-04  |
| UNI01  | -51.85 | 1    | 105.7 | 105.7 | 24.69 | 0     | 4e-04  |
| UNI10  | -41.79 | 1    | 85.58 | 85.58 | 4.57  | 0.06  | 0.0082 |

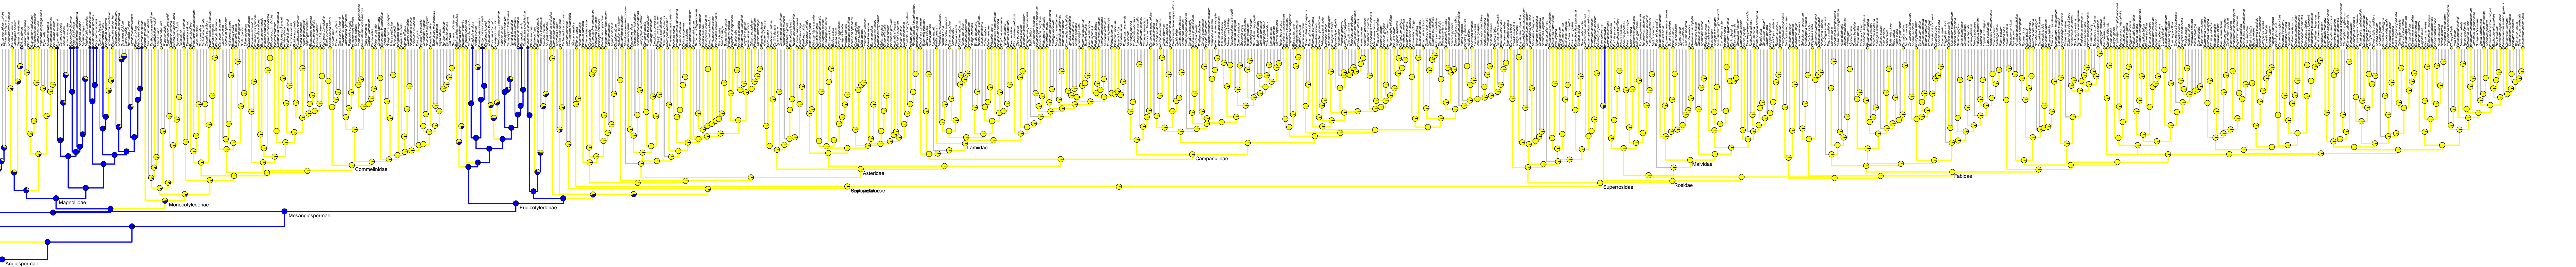



03\_A. Fusion of ovaries (binary) (D2c), ARDeq model

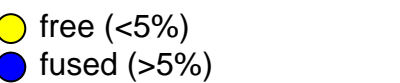

| Node        | ML state    | Prob   |
|-------------|-------------|--------|
| iospermae   | free (<5%)  | 1      |
| iospermae   | free (<5%)  | 0.9998 |
| ngnoliidae  | free (<5%)  | 0.9991 |
| cotyledonae | free (<5%)  | 0.9043 |
| cotyledonae | free (<5%)  | 0.9975 |
| nmelinidae  | fused (>5%) | 0.9999 |
| atapelae    | fused (>5%) | 0.9864 |
| erasteridae | fused (>5%) | 0.9864 |
| steridae    | fused (>5%) | 1      |
| amiidae     | fused (>5%) | 1      |
| npanulidae  | fused (>5%) | 1      |
| perrosidae  | fused (>5%) | 0.9986 |

| Model   | LogL    | Npar | AIC    | AICc   | Malindang | BayesAICc | fixed (5%) | q10   |
|---------|---------|------|--------|--------|-----------|-----------|------------|-------|
| ARD     | -94.59  | 2    | 193.19 | 193.20 | 0.38      | 0.59      | 0.0047     | 4e-04 |
| ARDeq** | -93.9   | 2    | 191.81 | 191.82 | 0         | 0.65      | 0.0047     | 4e-04 |
| ER      | -100.62 | 1    | 203.23 | 203.24 | 11.42     | 0         | 7e-04      | 7e-04 |
| UNI01   | -98.42  | 1    | 198.84 | 198.85 | 7.02      | 0.02      | 0.0098     |       |
| UNI10   | -105.87 | 1    | 213.73 | 213.74 | 21.91     | 0         | 8e-04      |       |

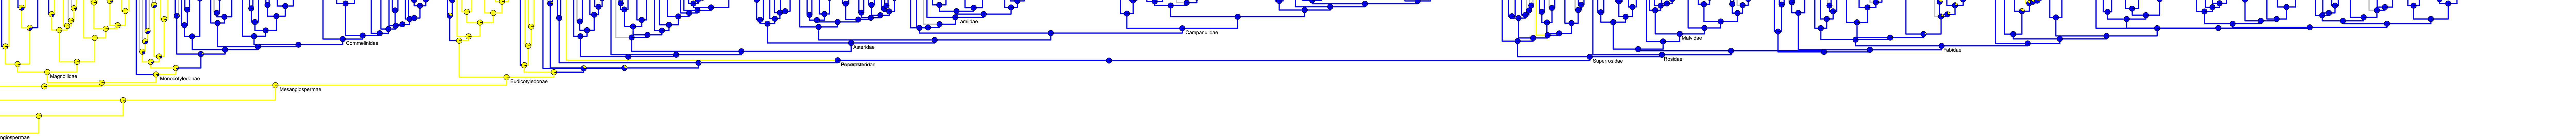

MP ancestral state reconstruction using ancestral.pars  
(R:phangorn)

411\_A. Number of ovules per functional carpel (3-state) (D2c), 119 steps

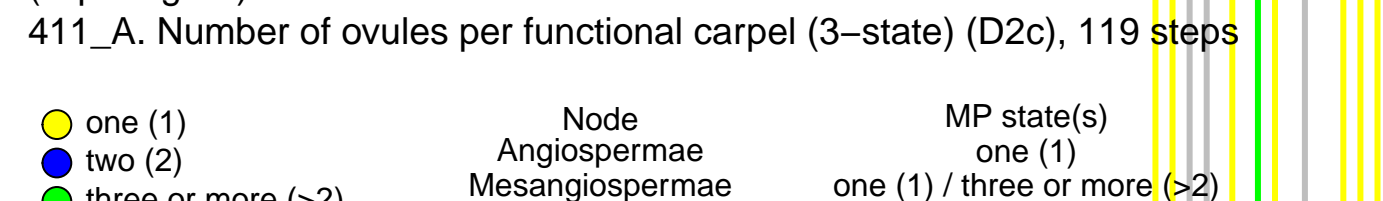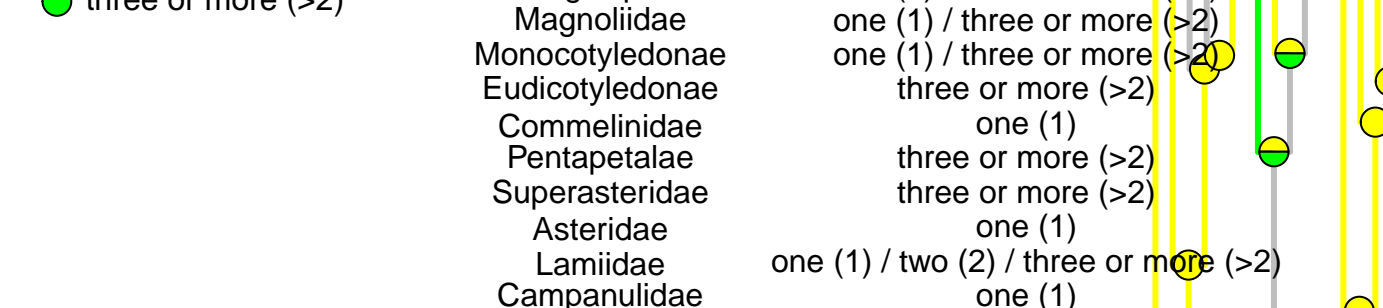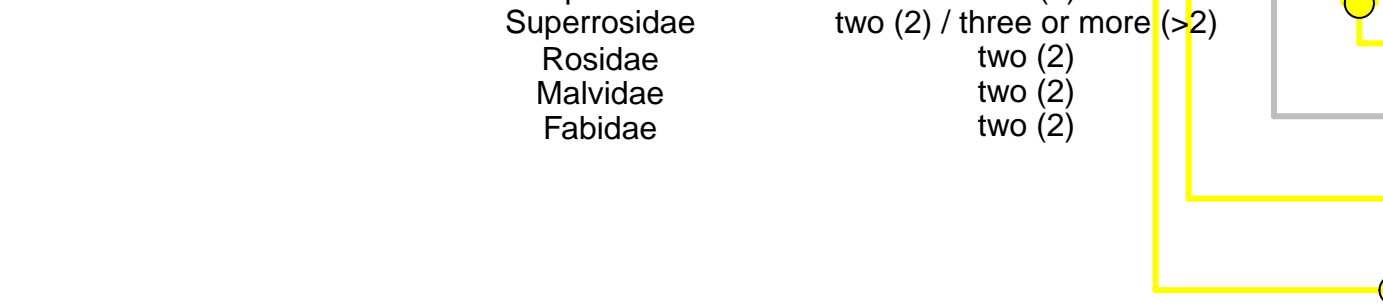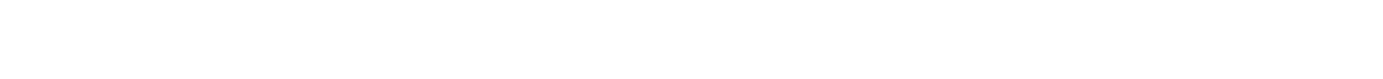

ML ancestral state reconstruction using rayDISC (R:corHMM)  
411\_A. Number of ovules per functional carpel (3-state) (D2c), ARDeq mode

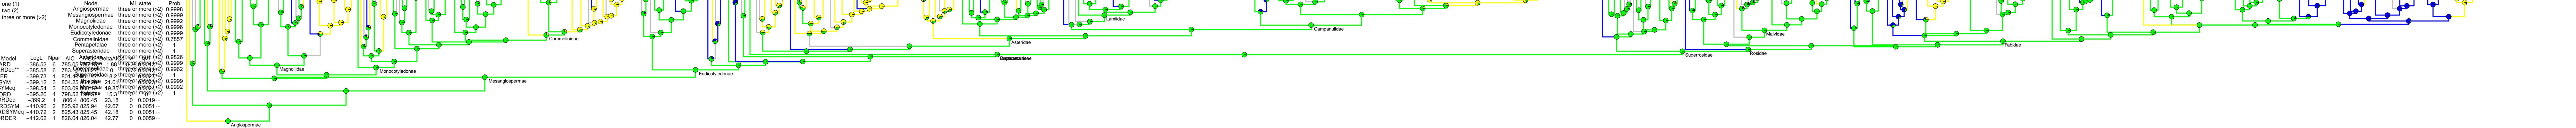

Supplement: Supplementary Data 23 [file ncomms16047-s24.pdf]
