# Supplementary material for: The ancestral flower of angiosperms and its early diversification
Source: Nat Commun. 2017 Aug 1;8:16047. doi: 10.1038/ncomms16047 (PMC5543309; doi:10.1038/ncomms16047)
Supplement: Supplementary Data 1 [file ncomms16047-s2.xlsx]

## Sheet: Caption
Supplementary Table 2. Summary of reconstructed ancestral states for 15 key nodes of angiosperms across 27 floral traits, according to three methods (MP, ML, rjMCMC) and 10 series of analyses differing by their input trees. Each tab corresponds to a series of analyses.
Maximum parsimony (MP)
Most parsimonious state(s) reconstructed on the MCC tree from the BEAST analysis.
Maximum likelihood (ML)
Most likely state (i.e., state with highest marginal likelihood) and associated 'probability' (proportional likelihood) reconstructed on the MCC tree from the BEAST analysis, using the best-fit model. For each trait, five to ten models were fitted, differing by the number of free transition rate parameters, transition rate parameters set to zero, and root state prior assumption. The best-fit mode…
Reversible-jump Markov Chain Monte Carlo (rjMCMC)
Most probable state (i.e., state with highest mean posterior 'probability') reconstructed from a Bayesian analysis that explores model space while sampling trees from the posterior of the BEAST analysis. The results thus account for model, parameter (transition rate), tree, and dating uncertainty. For each node, we report the mean and the lower and upper bound of the 95% highest posterior density…
Confidence score
To help visualize result consistency across the three methods, we computed a confidence score for each trait-node combination as follows:
***	reconstructed state identical across the three methods and lower bound of the 95% HPD of the rjMCMC analysis > 0.95
**	reconstructed state identical across the three methods and lower bound of the 95% HPD of the rjMCMC analysis > 0.5
	or reconstructed state identical across ML and rjMCMC and lower bound of the 95% HPD of the rjMCMC analysis > 0.95
*	otherwise
Cross-series comparisons
To help visualize result consistency across series of analyses, all reconstructed ancestral states and best model differences in comparison to a reference series are marked in boldface in subsequent tabs. For the B, C, D, E, and A200 series, the reference series is A. For the B200, C200, D200, and E200 series, the reference series are B, C, D, and E, respectively.

## Sheet: Confidence
A	100_A	100_B	102_B	201_A	201_B	201_C	230_A	231_A	232_A	232_B	234_A	204_A	207_A	301_B	301_C	330_A	331_A	332_A	332_B	305_A	311_A	312_A	313_A	401_B	400_A	403_A	411_A		*	**	***	avg score			A200	100_A	100_B	102_B	201_A	201_B	201_C	230_A	231_A	232_A	232_B	234_A	204_A	207_A	301_B
Angiospermae	**	***	***	***	*	***	*	**	***	***	***	***	***	*	***	*	*	*	*	*	**	***	*	***	**	*	**		10	5	12	2.07407			Angiospermae	*	**	**	***	*	***	*	*	**	**	**	**	**	*
Mesangiospermae	***	***	***	***	*	**	*	**	***	***	***	***	***	*	**	*	*	*	*	*	*	***	*	***	*	*	**		12	4	11	1.96296			Mesangiospermae	***	***	***	***	*	**	*	*	***	***	***	***	***	*
Magnoliidae	***	***	***	***	*	**	*	**	**	***	*	***	***	**	**	*	*	**	*	**	***	***	*	***	**	*	*		9	8	10	2.03704			Magnoliidae	***	***	***	***	*	**	*	**	**	***	*	**	**	**
Monocotyledoneae	***	***	***	***	**	***	*	***	***	***	***	***	**	***	*	***	*	*	***	*	***	**	**	*	*	*	**		8	5	14	2.22222			Monocotyledoneae	***	***	***	***	**	***	*	***	***	***	***	***	**	***
Eudicotyledoneae	***	***	***	***	*	**	*	*	*	*	*	***	***	*	**	***	*	*	*	***	*	**	*	*	*	*	**		15	4	8	1.74074			Eudicotyledoneae	***	***	***	***	*	**	*	*	*	*	*	***	**	*
Commelinidae	***	***	***	***	**	***	***	***	***	***	**	**	*	**	***	***	***	**	***	*	**	**	**	***	**	***	*		3	9	15	2.44444			Commelinidae	***	***	***	***	**	***	***	***	***	***	**	**	*	***
Pentapetalae	***	***	***	***	*	***	***	***	***	***	***	**	***	*	***	***	**	*	*	***	***	*	*	*	***	***	***		7	2	18	2.40741			Pentapetalae	***	***	***	***	**	***	***	***	***	***	***	**	***	*
Superasteridae	***	***	***	***	*	***	***	**	***	***	**	*	***	*	***	***	**	*	*	***	***	*	***	*	***	**	***		7	4	16	2.33333			Superasteridae	***	***	***	***	**	***	***	**	***	***	**	*	***	*
Asteridae	***	***	**	***	***	***	***	***	***	***	***	*	***	*	***	***	*	*	*	***	***	*	***	*	***	***	**		7	2	18	2.40741			Asteridae	***	***	**	***	***	***	***	***	***	***	***	*	***	*
Lamiidae	***	***	**	***	***	***	***	***	***	***	***	*	**	***	***	***	***	*	*	**	***	*	**	***	***	***	*		5	4	18	2.48148			Lamiidae	***	***	**	***	***	***	***	***	***	***	***	*	**	***
Campanulidae	**	***	*	***	**	***	***	***	***	***	***	**	**	***	***	***	***	*	*	**	***	**	**	*	**	***	*		5	8	14	2.33333			Campanulidae	**	***	*	***	***	***	***	***	***	***	***	***	**	***
Superrosidae	***	***	*	***	**	***	***	***	***	***	***	***	***	*	***	***	**	*	*	***	***	*	*	*	**	***	*		8	3	16	2.2963			Superrosidae	***	***	*	***	**	***	***	***	***	***	***	**	***	*
Rosidae	***	***	**	***	*	***	***	***	***	***	***	***	**	*	***	***	**	*	*	***	***	***	**	*	*	***	*		7	4	16	2.33333			Rosidae	***	***	*	***	**	***	***	***	***	***	***	**	**	*
Malvidae	**	***	***	***	***	***	***	***	***	***	**	**	**	*	***	***	**	**	**	**	***	*	**	*	***	***	*		4	9	14	2.37037			Malvidae	**	***	***	***	***	***	***	***	***	***	***	**	**	*
Fabidae	***	***	***	***	*	***	***	**	***	***	*	***	**	*	***	***	**	*	*	***	***	**	***	*	***	*	*		8	4	15	2.25926			Fabidae	***	***	***	***	*	***	***	**	***	***	*	***	**	*
*	0	0	2	0	8	0	5	1	1	1	3	3	1	10	1	3	6	12	12	4	2	6	6	10	4	6	8		115						*	1	0	3	0	5	0	5	3	1	1	3	3	1	10
**	3	0	3	0	4	3	0	5	1	0	3	4	6	2	3	0	6	3	1	4	2	5	6	0	5	1	5			75					**	2	1	3	0	6	3	0	3	2	1	3	7	9	1
***	12	15	10	15	3	12	10	9	13	14	9	8	8	3	11	12	3	0	2	7	11	4	3	5	6	8	2				215				***	12	14	9	15	4	12	10	9	12	13	9	5	5	4
avg score	2.8	3	2.53333	3	1.66667	2.8	2.33333	2.53333	2.8	2.86667	2.4	2.33333	2.46667	1.53333	2.66667	2.6	1.8	1.2	1.33333	2.2	2.6	1.86667	1.8	1.66667	2.13333	2.13333	1.6					2.24691			avg score	2.73333	2.93333	2.4	3	1.93333	2.8	2.33333	2.4	2.73333	2.8	2.4	2.13333	2.26667	1.6
B	100_A	100_B	102_B	201_A	201_B	201_C	230_A	231_A	232_A	232_B	234_A	204_A	207_A	301_B	301_C	330_A	331_A	332_A	332_B	305_A	311_A	312_A	313_A	401_B	400_A	403_A	411_A		*	**	***	avg score			B200	100_A	100_B	102_B	201_A	201_B	201_C	230_A	231_A	232_A	232_B	234_A	204_A	207_A	301_B
Angiospermae	**	***	***	***	*	**	*	***	**	*	***	***	***	*	***	*	*	*	*	*	**	**	*	***	**	*	*		12	6	9	1.88889			Angiospermae	*	**	***	***	*	**	*	**	*	**	**	**	**	*
Mesangiospermae	***	***	***	***	*	*	*	***	**	*	***	***	***	*	**	*	*	*	*	*	*	***	*	**	*	*	**		14	4	9	1.81481			Mesangiospermae	**	***	***	***	*	*	*	**	*	**	**	***	***	*
Magnoliidae	***	***	***	***	*	**	*	***	**	*	*	***	***	**	**	*	*	**	*	**	**	***	*	***	**	*	*		10	8	9	1.96296			Magnoliidae	***	***	***	***	*	*	*	**	**	***	**	**	**	*
Monocotyledoneae	***	***	***	***	***	***	*	***	***	*	***	***	**	***	**	***	*	*	***	*	***	**	**	*	**	*	**		7	6	14	2.25926			Monocotyledoneae	***	***	**	***	**	***	**	**	***	***	***	**	**	**
Eudicotyledoneae	***	***	***	***	*	*	*	**	*	*	*	***	***	*	**	*	*	*	*	***	*	**	*	*	*	*	**		16	4	7	1.66667			Eudicotyledoneae	***	***	***	***	*	*	*	*	*	*	*	***	**	*
Commelinidae	**	***	***	***	**	***	***	***	***	***	**	**	*	*	***	***	***	**	***	*	**	**	**	***	**	***	*		4	9	14	2.37037			Commelinidae	**	***	***	***	***	***	***	***	***	***	**	**	*	**
Pentapetalae	***	***	***	***	***	***	*	***	***	***	*	**	***	*	***	***	**	*	***	***	***	*	*	**	***	***	***		6	3	18	2.44444			Pentapetalae	***	***	***	***	***	***	***	***	***	***	***	**	***	*
Superasteridae	***	***	***	***	**	***	*	**	***	***	*	*	***	*	***	***	**	*	***	***	***	*	**	*	***	**	***		7	5	15	2.2963			Superasteridae	***	***	***	***	**	***	**	**	***	***	**	*	***	*
Asteridae	***	***	**	***	***	***	*	***	***	***	*	*	***	*	***	***	*	*	***	***	***	*	***	*	***	***	**		8	2	17	2.33333			Asteridae	***	***	**	***	***	***	***	***	***	***	***	*	***	*
Lamiidae	***	***	**	***	***	***	***	***	***	***	*	*	**	***	***	***	*	*	***	**	***	*	**	***	***	***	*		6	4	17	2.40741			Lamiidae	***	***	**	***	***	***	***	***	***	***	***	*	**	***
Campanulidae	**	***	*	***	***	***	***	***	***	***	*	***	**	***	***	***	*	*	***	**	***	*	**	**	**	***	*		6	6	15	2.33333			Campanulidae	*	***	*	***	***	***	***	***	***	***	***	***	**	***
Superrosidae	***	***	*	***	**	***	*	***	***	***	*	**	***	*	***	***	**	*	***	***	***	*	*	*	**	***	*		9	4	14	2.18519			Superrosidae	***	***	*	***	***	***	***	***	***	***	***	**	***	*
Rosidae	***	***	**	***	**	***	*	***	***	***	*	***	***	*	***	***	**	*	***	***	***	***	**	*	*	***	*		7	4	16	2.33333			Rosidae	***	***	*	***	**	***	***	***	***	***	***	**	**	*
Malvidae	**	***	***	***	***	***	***	***	***	***	*	**	**	*	***	***	**	**	***	**	***	*	**	**	**	***	*		4	9	14	2.37037			Malvidae	**	***	***	***	***	***	***	***	***	***	***	**	**	*
Fabidae	**	***	***	***	*	***	***	*	***	***	*	***	**	*	***	***	**	*	***	***	**	**	***	**	***	*	*		7	6	14	2.25926			Fabidae	***	***	***	***	**	***	***	**	***	***	*	***	**	*
*	0	0	2	0	5	2	10	1	1	5	11	3	1	11	0	4	8	12	4	4	2	7	6	6	3	6	9		123						*	2	0	3	0	4	3	4	1	3	1	2	3	1	11
**	5	0	3	0	4	2	0	2	3	0	1	4	5	1	4	0	6	3	0	4	4	5	7	5	7	1	4			80					**	3	1	3	0	4	1	2	6	1	2	5	8	9	2
***	10	15	10	15	6	11	5	12	11	10	3	8	9	3	11	11	1	0	11	7	9	3	2	4	5	8	2				202				***	10	14	9	15	7	11	9	8	11	12	8	4	5	2
avg score	2.66667	3	2.53333	3	2.06667	2.6	1.66667	2.73333	2.66667	2.33333	1.46667	2.33333	2.53333	1.46667	2.73333	2.46667	1.53333	1.2	2.46667	2.2	2.46667	1.73333	1.73333	1.86667	2.13333	2.13333	1.53333					2.19506			avg score	2.53333	2.93333	2.4	3	2.2	2.53333	2.33333	2.46667	2.53333	2.73333	2.4	2.06667	2.26667	1.4
C	100_A	100_B	102_B	201_A	201_B	201_C	230_A	231_A	232_A	232_B	234_A	204_A	207_A	301_B	301_C	330_A	331_A	332_A	332_B	305_A	311_A	312_A	313_A	401_B	400_A	403_A	411_A		*	**	***	avg score			C200	100_A	100_B	102_B	201_A	201_B	201_C	230_A	231_A	232_A	232_B	234_A	204_A	207_A	301_B
Angiospermae	**	***	***	***	*	**	*	**	***	***	***	***	***	*	***	*	*	*	*	*	**	***	*	***	**	*	**		10	6	11	2.03704			Angiospermae	*	**	**	***	*	**	*	**	**	**	**	**	**	*
Mesangiospermae	***	***	***	***	*	*	*	**	***	***	***	***	***	*	**	*	*	*	*	*	*	***	*	**	*	*	**		13	4	10	1.88889			Mesangiospermae	***	***	***	***	*	*	*	**	***	***	***	***	***	*
Magnoliidae	***	***	***	***	*	**	*	**	**	***	*	***	***	**	**	*	*	*	*	**	***	***	*	***	**	*	*		10	7	10	2			Magnoliidae	***	***	***	***	*	*	*	***	**	***	*	**	**	**
Monocotyledoneae	***	***	***	***	*	***	*	***	***	***	***	***	**	***	*	***	**	**	***	*	***	**	**	*	*	*	**		7	6	14	2.25926			Monocotyledoneae	***	***	**	***	*	***	*	**	***	***	***	**	**	*
Eudicotyledoneae	***	***	***	***	*	*	*	*	*	*	*	***	***	*	**	***	*	*	*	***	*	**	*	*	*	*	**		16	3	8	1.7037			Eudicotyledoneae	***	***	***	***	*	*	*	*	*	*	*	***	***	*
Commelinidae	**	***	***	***	*	***	***	***	***	***	**	**	*	**	***	***	***	**	***	*	**	**	**	***	**	***	*		4	9	14	2.37037			Commelinidae	**	***	***	***	***	***	***	***	***	***	**	**	*	**
Pentapetalae	***	***	***	***	**	***	***	***	***	***	**	*	***	*	***	***	**	*	*	***	***	*	*	*	***	**	***		7	4	16	2.33333			Pentapetalae	***	***	***	***	***	***	***	***	***	***	***	*	***	*
Superasteridae	***	***	***	***	*	***	**	**	***	***	*	*	***	*	***	***	**	*	*	***	***	*	**	*	***	**	***		8	5	14	2.22222			Superasteridae	***	***	***	***	**	***	**	***	***	***	**	*	***	*
Asteridae	***	***	**	***	*	***	***	***	***	***	***	*	***	*	**	***	**	*	*	***	***	*	**	*	***	***	**		7	5	15	2.2963			Asteridae	***	***	**	***	***	***	***	***	***	***	***	*	***	*
Lamiidae	***	***	**	***	*	***	***	***	***	***	***	*	**	***	***	***	***	*	*	**	***	*	**	***	***	***	*		6	4	17	2.40741			Lamiidae	***	***	**	***	***	***	***	***	***	***	***	*	**	***
Campanulidae	**	***	*	***	*	***	***	***	***	***	***	**	***	***	***	***	***	*	*	**	***	*	**	*	**	***	*		7	5	15	2.2963			Campanulidae	**	***	*	***	***	***	***	***	***	***	***	**	***	***
Superrosidae	***	***	**	***	*	***	***	***	***	***	***	**	***	*	***	***	**	*	*	***	***	*	*	*	**	***	*		8	4	15	2.25926			Superrosidae	***	***	*	***	***	***	***	***	***	***	***	*	***	*
Rosidae	***	***	*	***	*	***	***	***	***	***	**	**	***	*	***	***	**	*	*	***	***	***	**	*	*	***	*		8	4	15	2.25926			Rosidae	***	***	*	***	**	***	***	***	***	***	***	*	**	*
Malvidae	**	***	***	***	*	***	***	***	***	***	**	**	**	*	***	***	**	**	**	**	***	*	**	*	**	***	*		5	10	12	2.25926			Malvidae	**	***	***	***	***	***	***	***	***	***	**	**	**	*
Fabidae	**	***	***	***	*	***	***	*	***	***	*	***	**	*	***	***	**	*	*	***	**	**	***	*	***	*	*		9	5	13	2.14815			Fabidae	**	***	***	***	*	***	***	**	***	***	*	***	**	*
*	0	0	2	0	14	2	5	2	1	1	4	4	1	10	1	3	4	12	12	4	2	7	6	10	4	6	8		125						*	1	0	3	0	6	3	5	1	1	1	3	6	1	11
**	5	0	3	0	1	2	1	4	1	0	4	5	4	2	4	0	8	3	1	4	3	4	8	1	6	2	5			81					**	4	1	4	0	2	1	1	4	2	1	4	6	7	2
***	10	15	10	15	0	11	9	9	13	14	7	6	10	3	10	12	3	0	2	7	10	4	1	4	5	7	2				199				***	10	14	8	15	7	11	9	10	12	13	8	3	7	2
avg score	2.66667	3	2.53333	3	1.06667	2.6	2.26667	2.46667	2.8	2.86667	2.2	2.13333	2.6	1.53333	2.6	2.6	1.93333	1.2	1.33333	2.2	2.53333	1.8	1.66667	1.6	2.06667	2.06667	1.6					2.18272			avg score	2.6	2.93333	2.33333	3	2.06667	2.53333	2.26667	2.6	2.73333	2.8	2.33333	1.8	2.4	1.4
D	100_A	100_B	102_B	201_A	201_B	201_C	230_A	231_A	232_A	232_B	234_A	204_A	207_A	301_B	301_C	330_A	331_A	332_A	332_B	305_A	311_A	312_A	313_A	401_B	400_A	403_A	411_A		*	**	***	avg score			D200	100_A	100_B	102_B	201_A	201_B	201_C	230_A	231_A	232_A	232_B	234_A	204_A	207_A	301_B
Angiospermae	**	***	***	***	*	**	*	***	***	***	***	***	***	*	***	*	*	*	*	*	**	***	*	***	**	*	**		10	5	12	2.07407			Angiospermae	*	**	**	***	*	**	*	**	**	**	**	**	**	*
Mesangiospermae	***	***	***	***	*	*	*	***	***	***	***	***	***	*	*	**	*	*	*	*	**	***	*	**	*	*	**		12	4	11	1.96296			Mesangiospermae	***	***	***	***	*	*	*	**	***	***	**	***	***	*
Magnoliidae	***	***	***	***	*	*	*	***	**	***	*	***	***	**	**	*	*	**	*	**	**	***	*	**	**	*	*		10	8	9	1.96296			Magnoliidae	***	***	***	***	*	*	*	***	**	***	*	**	**	*
Monocotyledoneae	***	***	***	***	**	***	*	***	***	***	***	***	**	***	*	***	*	*	***	*	***	**	**	*	**	*	***		7	5	15	2.2963			Monocotyledoneae	***	***	**	***	**	***	**	**	***	***	***	**	**	***
Eudicotyledoneae	***	***	***	***	*	*	*	**	*	*	*	***	***	*	**	**	*	*	*	**	*	**	*	*	*	*	*		16	5	6	1.62963			Eudicotyledoneae	***	***	***	***	*	*	*	*	*	*	*	***	**	*
Commelinidae	**	***	***	***	**	***	***	***	***	***	**	**	*	*	***	***	**	**	***	*	**	**	**	***	**	***	*		4	10	13	2.33333			Commelinidae	**	***	***	***	***	***	***	***	***	***	**	**	*	***
Pentapetalae	***	***	***	***	*	***	***	***	***	***	***	**	***	*	***	***	**	*	*	***	***	*	*	**	***	***	**		6	4	17	2.40741			Pentapetalae	***	***	***	***	***	***	***	***	***	***	***	**	***	*
Superasteridae	***	***	***	***	*	***	**	**	***	***	**	*	***	*	***	***	**	*	*	***	***	*	*	*	***	**	**		8	6	13	2.18519			Superasteridae	***	***	***	***	***	***	***	***	***	***	**	*	***	*
Asteridae	***	***	**	***	**	***	***	***	***	***	***	*	***	*	**	***	*	*	*	***	***	*	**	*	***	***	**		7	5	15	2.2963			Asteridae	***	***	**	***	***	***	***	***	***	***	***	*	***	*
Lamiidae	***	***	**	***	***	***	***	***	***	***	***	*	**	***	***	***	***	*	*	**	***	*	**	***	***	***	*		5	4	18	2.48148			Lamiidae	***	***	**	***	***	***	***	***	***	***	***	*	**	***
Campanulidae	**	***	*	***	**	***	***	***	***	***	***	**	**	***	***	***	***	*	*	**	***	*	**	*	**	***	*		6	7	14	2.2963			Campanulidae	**	***	*	***	***	***	***	***	***	***	***	**	***	***
Superrosidae	***	***	**	***	*	***	***	***	***	***	***	***	***	*	***	***	**	*	*	***	***	*	*	*	**	***	*		8	3	16	2.2963			Superrosidae	***	***	*	***	***	***	***	***	***	***	***	**	***	*
Rosidae	***	***	*	***	*	***	***	***	***	***	**	***	***	*	***	***	**	*	*	***	***	***	**	**	*	***	*		7	4	16	2.33333			Rosidae	***	***	*	***	**	***	***	***	***	***	***	**	**	*
Malvidae	**	***	***	***	***	***	***	***	***	***	**	**	**	*	***	***	**	**	***	**	***	*	**	**	**	***	*		3	10	14	2.40741			Malvidae	**	***	***	***	***	***	***	***	***	***	**	**	**	*
Fabidae	**	***	***	***	*	***	***	*	***	***	*	***	**	*	***	***	**	*	*	***	***	**	***	**	***	*	*		8	5	14	2.22222			Fabidae	**	***	***	***	**	***	***	**	***	***	*	***	**	*
*	0	0	2	0	9	3	5	1	1	1	3	3	1	11	2	2	6	12	12	4	1	7	7	6	3	6	9		117						*	1	0	3	0	4	3	4	1	1	1	3	3	1	11
**	5	0	3	0	4	1	1	2	1	0	4	4	5	1	3	2	7	3	0	5	4	4	7	6	7	1	5			85					**	4	1	4	0	3	1	1	4	2	1	5	9	8	0
***	10	15	10	15	2	11	9	12	13	14	8	8	9	3	10	11	2	0	3	6	10	4	1	3	5	8	1				203				***	10	14	8	15	8	11	10	10	12	13	7	3	6	4
avg score	2.66667	3	2.53333	3	1.53333	2.53333	2.26667	2.73333	2.8	2.86667	2.33333	2.33333	2.53333	1.46667	2.53333	2.6	1.73333	1.2	1.4	2.13333	2.6	1.8	1.6	1.8	2.13333	2.13333	1.46667					2.21235			avg score	2.6	2.93333	2.33333	3	2.26667	2.53333	2.4	2.6	2.73333	2.8	2.26667	2	2.33333	1.53333
E	100_A	100_B	102_B	201_A	201_B	201_C	230_A	231_A	232_A	232_B	234_A	204_A	207_A	301_B	301_C	330_A	331_A	332_A	332_B	305_A	311_A	312_A	313_A	401_B	400_A	403_A	411_A		*	**	***	avg score			E200	100_A	100_B	102_B	201_A	201_B	201_C	230_A	231_A	232_A	232_B	234_A	204_A	207_A	301_B
Angiospermae	**	***	***	***	*	**	*	***	**	***	***	***	***	*	***	*	*	*	*	*	**	***	*	***	**	*	**		10	6	11	2.03704			Angiospermae	*	**	***	***	*	**	*	**	**	**	**	**	**	*
Mesangiospermae	***	***	***	***	*	*	*	***	**	***	***	***	***	*	**	*	*	*	*	*	*	***	*	**	*	*	**		13	4	10	1.88889			Mesangiospermae	***	***	***	***	*	*	*	**	**	**	**	***	***	*
Magnoliidae	***	***	***	***	*	*	*	***	**	***	*	***	***	*	**	*	*	**	*	**	**	***	*	***	**	*	*		11	6	10	1.96296			Magnoliidae	***	***	***	***	*	*	*	***	**	**	*	**	**	*
Monocotyledoneae	***	***	***	***	**	***	***	***	***	***	***	***	**	***	*	***	**	*	***	*	***	**	**	*	**	*	**		5	7	15	2.37037			Monocotyledoneae	***	***	***	***	**	***	**	**	***	***	***	**	**	***
Eudicotyledoneae	***	***	***	***	*	*	*	**	*	*	*	***	***	*	**	*	*	*	*	***	*	**	*	*	*	*	**		16	4	7	1.66667			Eudicotyledoneae	***	***	***	***	*	*	*	**	*	*	*	***	**	*
Commelinidae	**	***	***	***	**	***	***	***	***	***	**	**	*	***	***	***	***	**	***	*	**	**	**	***	**	***	*		3	9	15	2.44444			Commelinidae	**	***	***	***	***	***	***	***	***	***	**	**	*	*
Pentapetalae	***	***	***	***	*	***	***	***	***	***	***	**	***	*	***	***	**	*	***	***	***	*	*	**	***	**	***		5	4	18	2.48148			Pentapetalae	***	***	***	***	***	***	***	***	***	***	***	**	***	*
Superasteridae	***	***	***	***	*	***	**	**	***	***	**	*	***	*	***	***	**	*	***	***	***	*	**	*	***	**	***		6	6	15	2.33333			Superasteridae	***	***	***	***	***	***	***	***	***	***	**	*	***	*
Asteridae	***	***	*	***	***	***	***	***	***	***	***	*	***	*	***	***	*	*	***	**	***	*	***	*	***	***	**		7	2	18	2.40741			Asteridae	***	***	**	***	***	***	***	***	***	***	***	*	***	*
Lamiidae	***	***	**	***	***	***	***	***	***	***	***	*	**	***	***	***	***	*	***	**	***	**	**	***	***	***	*		3	5	19	2.59259			Lamiidae	***	***	**	***	***	***	***	***	***	***	***	*	**	***
Campanulidae	**	***	*	***	**	***	***	***	***	***	***	***	***	***	***	***	***	*	***	**	***	*	**	*	**	***	*		5	5	17	2.44444			Campanulidae	**	***	*	***	***	***	***	***	***	***	***	**	***	***
Superrosidae	***	***	*	***	*	***	***	***	***	***	***	**	***	*	***	***	**	*	***	***	***	*	*	*	**	***	**		7	4	16	2.33333			Superrosidae	***	***	**	***	***	***	***	***	***	***	***	**	***	*
Rosidae	***	***	*	***	*	***	***	***	***	***	**	***	***	*	***	***	**	*	***	***	***	***	**	**	*	***	*		6	4	17	2.40741			Rosidae	***	***	**	***	**	***	***	***	***	***	**	**	***	*
Malvidae	**	***	***	***	***	***	***	***	***	***	**	**	**	*	***	***	**	**	***	**	***	*	**	**	**	***	*		3	10	14	2.40741			Malvidae	**	***	***	***	***	***	***	***	***	***	**	**	**	*
Fabidae	**	***	***	***	*	***	***	*	***	***	*	***	**	*	***	***	**	*	***	***	**	**	***	**	***	*	*		7	6	14	2.25926			Fabidae	**	**	***	***	**	***	***	**	***	***	*	***	**	*
*	0	0	4	0	9	3	4	1	1	1	3	3	1	11	1	4	5	12	4	4	2	6	6	6	3	6	7		107						*	1	0	1	0	4	3	4	0	1	1	3	3	1	12
**	5	0	1	0	3	1	1	2	3	0	4	4	4	0	3	0	7	3	0	5	4	5	7	5	7	2	6			82					**	4	2	4	0	3	1	1	5	3	3	6	9	7	0
***	10	15	10	15	3	11	10	12	11	14	8	8	10	4	11	11	3	0	11	6	9	4	2	4	5	7	2				216				***	10	13	10	15	8	11	10	10	11	11	6	3	7	3
avg score	2.66667	3	2.4	3	1.6	2.53333	2.4	2.73333	2.66667	2.86667	2.33333	2.33333	2.6	1.53333	2.66667	2.46667	1.86667	1.2	2.46667	2.13333	2.46667	1.86667	1.73333	1.86667	2.13333	2.06667	1.66667					2.26914			avg score	2.6	2.86667	2.6	3	2.26667	2.53333	2.4	2.66667	2.66667	2.66667	2.2	2	2.4	1.4
[truncated: 17 more columns]

## Sheet: Nodes
	A								B								C								D								E								A200								B200
Character	Node	MP state(s)	ML state	Prob	rjMCMC state	Prob (mean and 95% HPD)	Confidence		Node	MP state(s)	ML state	Prob	rjMCMC state	Prob (mean and 95% HPD)	Confidence		Node	MP state(s)	ML state	Prob	rjMCMC state	Prob (mean and 95% HPD)	Confidence		Node	MP state(s)	ML state	Prob	rjMCMC state	Prob (mean and 95% HPD)	Confidence		Node	MP state(s)	ML state	Prob	rjMCMC state	Prob (mean and 95% HPD)	Confidence		Node	MP state(s)	ML state	Prob	rjMCMC state	Prob (mean and 95% HPD)	Confidence		Node
100_A. Functional sex of flowers (D2d)	Angiospermae	bisexual / unisexual	bisexual	1	bisexual	0.9982 (0.9899-1.0000)	**		Angiospermae	bisexual / unisexual	bisexual	1	bisexual	0.9994 (0.9964-1.0000)	**		Angiospermae	bisexual / unisexual	bisexual	1	bisexual	0.9967 (0.9901-1.0000)	**		Angiospermae	bisexual / unisexual	bisexual	1	bisexual	0.9961 (0.9888-1.0000)	**		Angiospermae	bisexual / unisexual	bisexual	1	bisexual	0.9986 (0.9907-1.0000)	**		Angiospermae	bisexual / unisexual	bisexual	1	bisexual	0.9725 (0.849-1.000)	*		Angiospermae
100_B. Structural sex of flowers (D2d)	Angiospermae	bisexual	bisexual	1	bisexual	0.9987 (0.9975-0.9997)	***		Angiospermae	bisexual	bisexual	1	bisexual	0.9995 (0.9993-0.9998)	***		Angiospermae	bisexual	bisexual	1	bisexual	0.9988 (0.9978-0.9997)	***		Angiospermae	bisexual	bisexual	1	bisexual	0.9987 (0.9975-0.9997)	***		Angiospermae	bisexual	bisexual	1	bisexual	0.9987 (0.9977-0.9997)	***		Angiospermae	bisexual	bisexual	0.9954	bisexual	0.963 (0.9309-0.9940)	**		Angiospermae
102_B. Ovary position (binary) (D2d)	Angiospermae	superior	superior	1	superior	0.9995 (0.9988-1.0000)	***		Angiospermae	superior	superior	1	superior	0.9996 (0.9997-1.0000)	***		Angiospermae	superior	superior	1	superior	0.9996 (0.9991-1.0000)	***		Angiospermae	superior	superior	1	superior	0.9995 (0.9989-1.0000)	***		Angiospermae	superior	superior	1	superior	0.9995 (0.9991-0.9999)	***		Angiospermae	superior	superior	0.9998	superior	0.9736 (0.9437-0.9954)	**		Angiospermae
201_A. Perianth presence (D2c)	Angiospermae	present	present	1	present	0.9993 (0.9999-1.0000)	***		Angiospermae	present	present	1	present	0.9999 (0.9988-1.0000)	***		Angiospermae	present	present	1	present	1 (0.9999-1.0000)	***		Angiospermae	present	present	1	present	1 (0.9999-1.0000)	***		Angiospermae	present	present	1	present	1 (0.9999-1.0000)	***		Angiospermae	present	present	1	present	0.9989 (0.9969-1.0000)	***		Angiospermae
201_B. Number of perianth parts (3-state) (D2c)	Angiospermae	six to ten (6-10) / more than ten (>10)	more than ten (>10)	1	more than ten (>10)	0.9605 (0.8343-1.0000)	*		Angiospermae	six to ten (6-10) / more than ten (>10)	more than ten (>10)	1	more than ten (>10)	0.954 (0.833-1.000)	*		Angiospermae	six to ten (6-10) / more than ten (>10)	more than ten (>10)	1	more than ten (>10)	0.94 (0.751-1.000)	*		Angiospermae	six to ten (6-10) / more than ten (>10)	more than ten (>10)	1	more than ten (>10)	0.9408 (0.6543-1.0000)	*		Angiospermae	six to ten (6-10) / more than ten (>10)	more than ten (>10)	1	more than ten (>10)	0.9682 (0.8839-1.0000)	*		Angiospermae	six to ten (6-10) / more than ten (>10)	more than ten (>10)	1	more than ten (>10)	0.8802 (0.6834-0.9972)	*		Angiospermae
201_C. Number of perianth parts (binary) (D2c)	Angiospermae	more than six (>6)	more than six (>6)	1	more than six (>6)	0.9989 (1-1)	***		Angiospermae	more than six (>6)	more than six (>6)	1	more than six (>6)	0.9879 (0.916-1.000)	**		Angiospermae	more than six (>6)	more than six (>6)	1	more than six (>6)	0.9897 (0.9345-1.0000)	**		Angiospermae	more than six (>6)	more than six (>6)	1	more than six (>6)	0.9801 (0.8749-1.0000)	**		Angiospermae	more than six (>6)	more than six (>6)	1	more than six (>6)	0.9845 (0.9412-1.0000)	**		Angiospermae	more than six (>6)	more than six (>6)	1	more than six (>6)	0.9965 (1-1)	***		Angiospermae
230_A. Perianth phyllotaxy (binary) (D2d)	Angiospermae	whorled / spiral	spiral	1	whorled	0.7743 (0-1)	*		Angiospermae	whorled / spiral	spiral	1	whorled	0.706 (0-1)	*		Angiospermae	whorled / spiral	spiral	1	whorled	0.8107 (0-1)	*		Angiospermae	whorled / spiral	spiral	1	whorled	0.7472 (0-1)	*		Angiospermae	whorled / spiral	spiral	1	whorled	0.7307 (0-1)	*		Angiospermae	whorled / spiral	spiral	1	whorled	0.716 (0.0009-1.0000)	*		Angiospermae
231_A. Number of perianth whorls (D2c)	Angiospermae	two (2) / more than two (>2)	more than two (>2)	1	more than two (>2)	0.9981 (0.9961-0.9997)	**		Angiospermae	more than two (>2)	more than two (>2)	1	more than two (>2)	0.9988 (0.9963-1.0000)	***		Angiospermae	two (2) / more than two (>2)	more than two (>2)	1	more than two (>2)	0.9989 (0.9973-0.9998)	**		Angiospermae	more than two (>2)	more than two (>2)	1	more than two (>2)	0.998 (0.9962-0.9997)	***		Angiospermae	more than two (>2)	more than two (>2)	1	more than two (>2)	0.9984 (0.9969-0.9997)	***		Angiospermae	two (2) / more than two (>2)	more than two (>2)	1	more than two (>2)	0.9474 (0.9001-0.9917)	*		Angiospermae
232_A. Perianth merism (4-state) (D2c)	Angiospermae	trimerous	trimerous	1	trimerous	0.9738 (0.9599-0.9905)	***		Angiospermae	trimerous	trimerous	1	trimerous	0.9129 (0.8312-0.9950)	**		Angiospermae	trimerous	trimerous	1	trimerous	0.9792 (0.9701-0.9917)	***		Angiospermae	trimerous	trimerous	1	trimerous	0.9789 (0.9698-0.9907)	***		Angiospermae	trimerous	trimerous	1	trimerous	0.9177 (0.857-0.988)	**		Angiospermae	trimerous	trimerous	1	trimerous	0.7949 (0.6997-0.9388)	**		Angiospermae
232_B. Perianth merism (3-state) (D2c)	Angiospermae	trimerous	trimerous	1	trimerous	0.9894 (0.9905-0.9969)	***		Angiospermae	trimerous	trimerous	1	trimerous	0.9014 (0.000-0.991)	*		Angiospermae	trimerous	trimerous	1	trimerous	0.992 (0.9917-0.9970)	***		Angiospermae	trimerous	trimerous	1	trimerous	0.9914 (0.9916-0.9971)	***		Angiospermae	trimerous	trimerous	1	trimerous	0.9802 (0.9642-0.9960)	***		Angiospermae	trimerous	trimerous	1	trimerous	0.9072 (0.8646-0.9734)	**		Angiospermae
234_A. Perianth differentiation (binary) (D2d)	Angiospermae	undifferentiated	undifferentiated	1	undifferentiated	0.9986 (0.996-1.000)	***		Angiospermae	undifferentiated	undifferentiated	1	undifferentiated	0.9977 (0.9952-1.0000)	***		Angiospermae	undifferentiated	undifferentiated	1	undifferentiated	0.9991 (0.9969-1.0000)	***		Angiospermae	undifferentiated	undifferentiated	1	undifferentiated	0.9988 (0.9959-1.0000)	***		Angiospermae	undifferentiated	undifferentiated	1	undifferentiated	0.9984 (0.9947-1.0000)	***		Angiospermae	undifferentiated	undifferentiated	1	undifferentiated	0.9606 (0.9065-0.9978)	**		Angiospermae
204_A. Fusion of perianth (D2c)	Angiospermae	free (<5%)	free (<5%)	0.9984	free (<5%)	0.9978 (0.9950-0.9997)	***		Angiospermae	free (<5%)	free (<5%)	1	free (<5%)	0.9964 (0.9789-0.9999)	***		Angiospermae	free (<5%)	free (<5%)	1	free (<5%)	0.9981 (0.9961-0.9998)	***		Angiospermae	free (<5%)	free (<5%)	1	free (<5%)	0.9982 (0.9961-0.9997)	***		Angiospermae	free (<5%)	free (<5%)	1	free (<5%)	0.9979 (0.9957-0.9997)	***		Angiospermae	free (<5%)	free (<5%)	0.9237	free (<5%)	0.923 (0.8519-0.9917)	**		Angiospermae
207_A. Symmetry of perianth (binary) (D2d)	Angiospermae	actinomorphic	actinomorphic	1	actinomorphic	0.9952 (0.9894-1.0000)	***		Angiospermae	actinomorphic	actinomorphic	1	actinomorphic	0.995 (0.9773-1.0000)	***		Angiospermae	actinomorphic	actinomorphic	1	actinomorphic	0.998 (0.993-1.000)	***		Angiospermae	actinomorphic	actinomorphic	1	actinomorphic	0.9962 (0.9902-1.0000)	***		Angiospermae	actinomorphic	actinomorphic	1	actinomorphic	0.9985 (0.9941-1.0000)	***		Angiospermae	actinomorphic	actinomorphic	0.9974	actinomorphic	0.8839 (0.7555-1.0000)	**		Angiospermae
301_B. Number of fertile stamens (3-state) (D2c)	Angiospermae	more than ten (>10)	more than ten (>10)	1	more than ten (>10)	0.9346 (0.1423-1.0000)	*		Angiospermae	more than ten (>10)	more than ten (>10)	1	more than ten (>10)	0.7921 (0.104-1.000)	*		Angiospermae	more than ten (>10)	more than ten (>10)	1	more than ten (>10)	0.8374 (0.107-1.000)	*		Angiospermae	more than ten (>10)	more than ten (>10)	1	more than ten (>10)	0.7988 (0.0951-1.0000)	*		Angiospermae	more than ten (>10)	more than ten (>10)	1	more than ten (>10)	0.5853 (0.0971-1.0000)	*		Angiospermae	more than ten (>10)	more than ten (>10)	1	more than ten (>10)	0.8728 (0.3423-1.0000)	*		Angiospermae
301_C. Number of fertile stamens (binary) (D2c)	Angiospermae	more than six (>6)	more than six (>6)	1	more than six (>6)	1 (0.9999-1.0000)	***		Angiospermae	more than six (>6)	more than six (>6)	1	more than six (>6)	1 (1-1)	***		Angiospermae	more than six (>6)	more than six (>6)	1	more than six (>6)	1 (0.9999-1.0000)	***		Angiospermae	more than six (>6)	more than six (>6)	1	more than six (>6)	1 (0.9999-1.0000)	***		Angiospermae	more than six (>6)	more than six (>6)	1	more than six (>6)	1 (0.9999-1.0000)	***		Angiospermae	more than six (>6)	more than six (>6)	1	more than six (>6)	0.9978 (0.9924-1.0000)	***		Angiospermae
330_A. Androecium structural phyllotaxy (binary) (D2d)	Angiospermae	whorled / spiral	whorled	1	whorled	0.9236 (0.0089-1.0000)	*		Angiospermae	whorled / spiral	spiral	1	whorled	0.9378 (0.2501-1.0000)	*		Angiospermae	whorled / spiral	whorled	1	whorled	0.9267 (0.0184-1.0000)	*		Angiospermae	whorled / spiral	whorled	1	whorled	0.9262 (0.0027-1.0000)	*		Angiospermae	whorled / spiral	spiral	1	whorled	0.9072 (0.0005-1.0000)	*		Angiospermae	whorled / spiral	spiral	0.9988	whorled	0.8283 (0.7075-1.0000)	*		Angiospermae
331_A. Number of androecium structural whorls (3-state) (D2c)	Angiospermae	more than two (>2)	more than two (>2)	1	more than two (>2)	0.5651 (0.0000-0.9988)	*		Angiospermae	more than two (>2)	more than two (>2)	0.9965	two (2)	0.5189 (0.0009-1.0000)	*		Angiospermae	more than two (>2)	two (2)	1	more than two (>2)	0.626 (0.0000-0.9992)	*		Angiospermae	more than two (>2)	more than two (>2)	1	more than two (>2)	0.542 (0.0000-0.9988)	*		Angiospermae	more than two (>2)	two (2)	1	more than two (>2)	0.5957 (0.0000-0.9989)	*		Angiospermae	more than two (>2)	more than two (>2)	1	more than two (>2)	0.5035 (0.0556-0.9974)	*		Angiospermae
332_A. Androecium structural merism (4-state) (D2c)	Angiospermae	trimerous	trimerous	1	trimerous	0.8964 (0.3518-0.9993)	*		Angiospermae	trimerous / pentamerous	trimerous	1	trimerous	0.8353 (0.1856-0.9993)	*		Angiospermae	trimerous	tetramerous	0.9846	trimerous	0.9218 (0.7064-0.9989)	*		Angiospermae	trimerous	dimerous	0.4999	trimerous	0.8733 (0.1990-0.9992)	*		Angiospermae	trimerous / tetramerous / pentamerous	tetramerous	0.6864	trimerous	0.8517 (0.2407-0.9990)	*		Angiospermae	trimerous	trimerous	1	trimerous	0.7355 (0.4819-0.9980)	*		Angiospermae
332_B. Androecium structural merism (3-state) (D2c)	Angiospermae	trimerous	trimerous	1	trimerous	0.6983 (0.0000-0.9979)	*		Angiospermae	trimerous / tetramerous / pentamerous	trimerous	1	pentamerous	1 (1-1)	*		Angiospermae	trimerous	trimerous	1	trimerous	0.4622 (0.0000-0.9976)	*		Angiospermae	trimerous	trimerous	1	pentamerous	0.8908 (0.0116-1.0000)	*		Angiospermae	trimerous / tetramerous / pentamerous	trimerous	0.9999	pentamerous	1 (1-1)	*		Angiospermae	trimerous	trimerous	0.9999	pentamerous	0.9024 (0.1446-1.0000)	*		Angiospermae
305_A. Filament (binary) (D2d)	Angiospermae	laminar (wide)	laminar (wide)	0.9999	typical (narrow)	0.7986 (0.0313-0.9828)	*		Angiospermae	laminar (wide) / typical (narrow)	laminar (wide)	1	typical (narrow)	0.8019 (0.0078-0.9882)	*		Angiospermae	laminar (wide)	laminar (wide)	0.9999	typical (narrow)	0.7193 (0.0103-0.9776)	*		Angiospermae	laminar (wide) / typical (narrow)	laminar (wide)	1	typical (narrow)	0.8117 (0.0093-0.9873)	*		Angiospermae	laminar (wide) / typical (narrow)	laminar (wide)	1	typical (narrow)	0.8325 (0.0099-0.9849)	*		Angiospermae	laminar (wide)	laminar (wide)	0.9845	typical (narrow)	0.6961 (0.1794-0.9088)	*		Angiospermae
311_A. Anther orientation (D2d)	Angiospermae	introrse	introrse	1	introrse	0.9707 (0.909-1.000)	**		Angiospermae	introrse	introrse	1	introrse	0.9572 (0.8759-1.0000)	**		Angiospermae	introrse	introrse	1	introrse	0.9633 (0.8982-1.0000)	**		Angiospermae	introrse	introrse	1	introrse	0.969 (0.9228-1.0000)	**		Angiospermae	introrse	introrse	1	introrse	0.9611 (0.8948-1.0000)	**		Angiospermae	introrse	introrse	0.8346	introrse	0.8724 (0.7694-0.9765)	**		Angiospermae
312_A. Anther attachment (binary) (D2d)	Angiospermae	basifixed	basifixed	1	basifixed	0.9957 (0.9908-0.9995)	***		Angiospermae	basifixed	basifixed	1	basifixed	0.9901 (0.9491-0.9998)	**		Angiospermae	basifixed	basifixed	1	basifixed	0.9957 (0.9913-0.9993)	***		Angiospermae	basifixed	basifixed	1	basifixed	0.9966 (0.9924-0.9994)	***		Angiospermae	basifixed	basifixed	1	basifixed	0.9952 (0.9902-0.9991)	***		Angiospermae	basifixed	basifixed	0.9776	basifixed	0.8715 (0.7578-0.9876)	**		Angiospermae
313_A. Anther dehiscence (3-state) (D2d)	Angiospermae	longitudinal slit	longitudinal slit	1	longitudinal slit	0.8243 (0-1)	*		Angiospermae	longitudinal slit	longitudinal slit	1	longitudinal slit	0.8108 (0-1)	*		Angiospermae	longitudinal slit	longitudinal slit	1	longitudinal slit	0.7253 (0-1)	*		Angiospermae	longitudinal slit	longitudinal slit	1	longitudinal slit	0.5693 (0-1)	*		Angiospermae	longitudinal slit	longitudinal slit	1	longitudinal slit	0.8676 (0-1)	*		Angiospermae	longitudinal slit	longitudinal slit	1	longitudinal slit	0.8135 (0-1)	*		Angiospermae
401_B. Number of structural carpels (5-state) (D2c)	Angiospermae	more than five (>5)	more than five (>5)	1	more than five (>5)	0.9957 (0.9976-1.0000)	***		Angiospermae	more than five (>5)	more than five (>5)	1	more than five (>5)	0.9916 (0.9956-1.0000)	***		Angiospermae	more than five (>5)	more than five (>5)	1	more than five (>5)	0.9937 (0.9944-0.9999)	***		Angiospermae	more than five (>5)	more than five (>5)	1	more than five (>5)	0.9831 (0.9924-1.0000)	***		Angiospermae	more than five (>5)	more than five (>5)	1	more than five (>5)	0.9862 (0.9947-1.0000)	***		Angiospermae	more than five (>5)	more than five (>5)	1	more than five (>5)	0.9515 (0.8703-0.9999)	**		Angiospermae
400_A. Gynoecium phyllotaxy (D2d)	Angiospermae	whorled / spiral	spiral	1	spiral	0.9677 (0.9991-1.0000)	**		Angiospermae	whorled / spiral	spiral	1	spiral	0.9696 (0.9895-1.0000)	**		Angiospermae	whorled / spiral	spiral	1	spiral	0.9715 (0.9994-1.0000)	**		Angiospermae	whorled / spiral	spiral	1	spiral	0.9692 (0.9993-1.0000)	**		Angiospermae	whorled / spiral	spiral	1	spiral	0.9711 (0.9994-1.0000)	**		Angiospermae	whorled / spiral	spiral	1	spiral	0.918 (0.175-1.000)	*		Angiospermae
403_A. Fusion of ovaries (binary) (D2c)	Angiospermae	free (<5%)	free (<5%)	1	free (<5%)	0.7734 (0.0927-1.0000)	*		Angiospermae	free (<5%) / fused (>5%)	free (<5%)	1	free (<5%)	0.6037 (0.0671-1.0000)	*		Angiospermae	free (<5%)	free (<5%)	1	free (<5%)	0.7259 (0.0931-1.0000)	*		Angiospermae	free (<5%) / fused (>5%)	free (<5%)	1	free (<5%)	0.6456 (0.0655-1.0000)	*		Angiospermae	free (<5%) / fused (>5%)	free (<5%)	1	free (<5%)	0.6544 (0.0736-1.0000)	*		Angiospermae	free (<5%)	free (<5%)	1	free (<5%)	0.5406 (0.2569-1.0000)	*		Angiospermae
411_A. Number of ovules per functional carpel (3-state) (D2c)	Angiospermae	one (1)	three or more (>2)	1	three or more (>2)	0.9965 (0.9909-1.0000)	**		Angiospermae	one (1)	three or more (>2)	1	three or more (>2)	0.9869 (0.9476-1.0000)	*		Angiospermae	one (1)	three or more (>2)	1	three or more (>2)	0.9973 (0.9911-1.0000)	**		Angiospermae	one (1)	three or more (>2)	1	three or more (>2)	0.9928 (0.9906-1.0000)	**		Angiospermae	one (1)	three or more (>2)	1	three or more (>2)	0.9949 (0.9887-1.0000)	**		Angiospermae	one (1)	three or more (>2)	0.9997	three or more (>2)	0.9699 (0.81-1.00)	*		Angiospermae
100_A. Functional sex of flowers (D2d)	Mesangiospermae	bisexual	bisexual	1	bisexual	1 (1-1)	***		Mesangiospermae	bisexual	bisexual	1	bisexual	1 (0.9999-1.0000)	***		Mesangiospermae	bisexual	bisexual	1	bisexual	1 (1-1)	***		Mesangiospermae	bisexual	bisexual	1	bisexual	1 (1-1)	***		Mesangiospermae	bisexual	bisexual	1	bisexual	0.9998 (0.9985-1.0000)	***		Mesangiospermae	bisexual	bisexual	1	bisexual	1 (0.9997-1.0000)	***		Mesangiospermae
100_B. Structural sex of flowers (D2d)	Mesangiospermae	bisexual	bisexual	1	bisexual	1 (1-1)	***		Mesangiospermae	bisexual	bisexual	1	bisexual	0.9999 (0.9999-1.0000)	***		Mesangiospermae	bisexual	bisexual	1	bisexual	1 (1-1)	***		Mesangiospermae	bisexual	bisexual	1	bisexual	1 (1-1)	***		Mesangiospermae	bisexual	bisexual	1	bisexual	0.9989 (0.9961-1.0000)	***		Mesangiospermae	bisexual	bisexual	0.9997	bisexual	0.9999 (0.9998-1.0000)	***		Mesangiospermae
102_B. Ovary position (binary) (D2d)	Mesangiospermae	superior	superior	1	superior	1 (0.9999-1.0000)	***		Mesangiospermae	superior	superior	1	superior	0.9999 (0.9999-1.0000)	***		Mesangiospermae	superior	superior	1	superior	1 (1-1)	***		Mesangiospermae	superior	superior	1	superior	0.9999 (0.9999-1.0000)	***		Mesangiospermae	superior	superior	1	superior	0.9995 (0.9976-1.0000)	***		Mesangiospermae	superior	superior	0.9997	superior	0.9995 (0.9988-1.0000)	***		Mesangiospermae
201_A. Perianth presence (D2c)	Mesangiospermae	present	present	1	present	0.9993 (1-1)	***		Mesangiospermae	present	present	1	present	1 (0.9999-1.0000)	***		Mesangiospermae	present	present	1	present	1 (1-1)	***		Mesangiospermae	present	present	1	present	1 (1-1)	***		Mesangiospermae	present	present	1	present	0.9955 (0.98-1.00)	***		Mesangiospermae	present	present	1	present	0.9999 (0.9997-1.0000)	***		Mesangiospermae
201_B. Number of perianth parts (3-state) (D2c)	Mesangiospermae	six to ten (6-10)	more than ten (>10)	0.9999	more than ten (>10)	0.7536 (0.0518-0.9999)	*		Mesangiospermae	six to ten (6-10)	more than ten (>10)	1	more than ten (>10)	0.5604 (0.0522-1.0000)	*		Mesangiospermae	six to ten (6-10)	more than ten (>10)	0.9999	more than ten (>10)	0.5619 (0.0209-1.0000)	*		Mesangiospermae	six to ten (6-10)	more than ten (>10)	0.9998	more than ten (>10)	0.6896 (0.0311-0.9999)	*		Mesangiospermae	one to five (1-5) / six to ten (6-10) / more than ten (>10)	more than ten (>10)	1	more than ten (>10)	0.7399 (0.0754-1.0000)	*		Mesangiospermae	six to ten (6-10)	more than ten (>10)	0.999	more than ten (>10)	0.6079 (0.0000-0.9882)	*		Mesangiospermae
201_C. Number of perianth parts (binary) (D2c)	Mesangiospermae	one to six (1-6) / more than six (>6)	more than six (>6)	1	more than six (>6)	0.9869 (1-1)	**		Mesangiospermae	one to six (1-6)	more than six (>6)	1	more than six (>6)	0.8553 (0.1033-1.0000)	*		Mesangiospermae	one to six (1-6) / more than six (>6)	more than six (>6)	1	more than six (>6)	0.8405 (0.153-1.000)	*		Mesangiospermae	one to six (1-6)	more than six (>6)	0.9998	more than six (>6)	0.8232 (0.0635-1.0000)	*		Mesangiospermae	one to six (1-6)	more than six (>6)	1	more than six (>6)	0.631 (0.1514-1.0000)	*		Mesangiospermae	one to six (1-6) / more than six (>6)	more than six (>6)	0.9998	more than six (>6)	0.9831 (1-1)	**		Mesangiospermae
230_A. Perianth phyllotaxy (binary) (D2d)	Mesangiospermae	whorled	spiral	1	whorled	0.7957 (0.0004-1.0000)	*		Mesangiospermae	whorled	spiral	1	whorled	0.7239 (0.0003-1.0000)	*		Mesangiospermae	whorled	spiral	1	whorled	0.8331 (0.0005-1.0000)	*		Mesangiospermae	whorled	spiral	0.9999	whorled	0.7668 (0.0018-1.0000)	*		Mesangiospermae	whorled	spiral	1	whorled	0.7514 (0.0003-1.0000)	*		Mesangiospermae	whorled	spiral	0.9997	whorled	0.8533 (0.0013-1.0000)	*		Mesangiospermae
231_A. Number of perianth whorls (D2c)	Mesangiospermae	two (2) / more than two (>2)	more than two (>2)	1	more than two (>2)	0.9903 (0.9743-0.9999)	**		Mesangiospermae	more than two (>2)	more than two (>2)	1	more than two (>2)	0.9945 (0.9866-0.9999)	***		Mesangiospermae	two (2) / more than two (>2)	more than two (>2)	1	more than two (>2)	0.9961 (0.9876-0.9999)	**		Mesangiospermae	more than two (>2)	more than two (>2)	0.9999	more than two (>2)	0.992 (0.9798-0.9995)	***		Mesangiospermae	more than two (>2)	more than two (>2)	1	more than two (>2)	0.9952 (0.9876-0.9998)	***		Mesangiospermae	two (2) / more than two (>2)	more than two (>2)	0.9994	more than two (>2)	0.9573 (0.8675-0.9996)	*		Mesangiospermae
232_A. Perianth merism (4-state) (D2c)	Mesangiospermae	trimerous	trimerous	1	trimerous	0.9954 (0.9923-1.0000)	***		Mesangiospermae	trimerous	trimerous	1	trimerous	0.9211 (0.8193-1.0000)	**		Mesangiospermae	trimerous	trimerous	1	trimerous	0.997 (0.9947-1.0000)	***		Mesangiospermae	trimerous	trimerous	1	trimerous	0.9972 (0.9948-1.0000)	***		Mesangiospermae	trimerous	trimerous	1	trimerous	0.9411 (0.8785-1.0000)	**		Mesangiospermae	trimerous	trimerous	1	trimerous	0.9796 (0.9589-0.9999)	***		Mesangiospermae
232_B. Perianth merism (3-state) (D2c)	Mesangiospermae	trimerous	trimerous	1	trimerous	0.9945 (0.9975-0.9998)	***		Mesangiospermae	trimerous	trimerous	1	trimerous	0.8927 (0.0000-0.9885)	*		Mesangiospermae	trimerous	trimerous	1	trimerous	0.9967 (0.9979-0.9998)	***		Mesangiospermae	trimerous	trimerous	1	trimerous	0.9963 (0.9982-0.9999)	***		Mesangiospermae	trimerous	trimerous	1	trimerous	0.9792 (0.9540-0.9999)	***		Mesangiospermae	trimerous	trimerous	1	trimerous	0.9807 (0.9790-0.9996)	***		Mesangiospermae
234_A. Perianth differentiation (binary) (D2d)	Mesangiospermae	undifferentiated	undifferentiated	1	undifferentiated	0.9982 (0.991-1.000)	***		Mesangiospermae	undifferentiated	undifferentiated	1	undifferentiated	0.9936 (0.9645-1.0000)	***		Mesangiospermae	undifferentiated	undifferentiated	1	undifferentiated	0.9984 (0.9911-1.0000)	***		Mesangiospermae	undifferentiated	undifferentiated	1	undifferentiated	0.9983 (0.9901-1.0000)	***		Mesangiospermae	undifferentiated	undifferentiated	1	undifferentiated	0.9936 (0.9709-1.0000)	***		Mesangiospermae	undifferentiated	undifferentiated	1	undifferentiated	0.99 (0.9639-1.0000)	***		Mesangiospermae
204_A. Fusion of perianth (D2c)	Mesangiospermae	free (<5%)	free (<5%)	1	free (<5%)	1 (0.9999-1.0000)	***		Mesangiospermae	free (<5%)	free (<5%)	1	free (<5%)	0.9999 (0.9998-1.0000)	***		Mesangiospermae	free (<5%)	free (<5%)	1	free (<5%)	1 (0.9999-1.0000)	***		Mesangiospermae	free (<5%)	free (<5%)	1	free (<5%)	0.9999 (0.9998-1.0000)	***		Mesangiospermae	free (<5%)	free (<5%)	1	free (<5%)	0.9997 (0.9989-1.0000)	***		Mesangiospermae	free (<5%)	free (<5%)	1	free (<5%)	0.9994 (0.9982-1.0000)	***		Mesangiospermae
207_A. Symmetry of perianth (binary) (D2d)	Mesangiospermae	actinomorphic	actinomorphic	1	actinomorphic	0.9988 (0.999-1.000)	***		Mesangiospermae	actinomorphic	actinomorphic	1	actinomorphic	0.9986 (0.9992-1.0000)	***		Mesangiospermae	actinomorphic	actinomorphic	1	actinomorphic	0.9999 (0.9997-1.0000)	***		Mesangiospermae	actinomorphic	actinomorphic	1	actinomorphic	0.9986 (0.9985-1.0000)	***		Mesangiospermae	actinomorphic	actinomorphic	1	actinomorphic	0.9997 (0.9988-1.0000)	***		Mesangiospermae	actinomorphic	actinomorphic	0.9999	actinomorphic	0.9946 (0.9813-1.0000)	***		Mesangiospermae
301_B. Number of fertile stamens (3-state) (D2c)	Mesangiospermae	one to five (1-5) / more than ten (>10)	more than ten (>10)	1	more than ten (>10)	0.9245 (0.0023-1.0000)	*		Mesangiospermae	one to five (1-5) / more than ten (>10)	more than ten (>10)	1	more than ten (>10)	0.7642 (0.0008-1.0000)	*		Mesangiospermae	one to five (1-5) / more than ten (>10)	more than ten (>10)	1	more than ten (>10)	0.8152 (0.0011-1.0000)	*		Mesangiospermae	one to five (1-5) / six to ten (6-10) / more than ten (>10)	more than ten (>10)	0.9998	more than ten (>10)	0.7627 (0.0006-1.0000)	*		Mesangiospermae	one to five (1-5) / six to ten (6-10)	more than ten (>10)	1	more than ten (>10)	0.5292 (0.0005-1.0000)	*		Mesangiospermae	one to five (1-5) / more than ten (>10)	more than ten (>10)	0.9998	more than ten (>10)	0.8062 (0.0038-1.0000)	*		Mesangiospermae
301_C. Number of fertile stamens (binary) (D2c)	Mesangiospermae	one to six (1-6) / more than six (>6)	more than six (>6)	1	more than six (>6)	0.9898 (0.9558-1.0000)	**		Mesangiospermae	one to six (1-6)	more than six (>6)	1	more than six (>6)	0.9919 (0.9656-1.0000)	**		Mesangiospermae	one to six (1-6) / more than six (>6)	more than six (>6)	1	more than six (>6)	0.9892 (0.9525-1.0000)	**		Mesangiospermae	one to six (1-6)	more than six (>6)	0.9999	more than six (>6)	0.98 (0.9392-1.0000)	*		Mesangiospermae	one to six (1-6)	more than six (>6)	1	more than six (>6)	0.9923 (0.9678-1.0000)	**		Mesangiospermae	one to six (1-6) / more than six (>6)	more than six (>6)	0.9995	more than six (>6)	0.9876 (0.9447-1.0000)	*		Mesangiospermae
330_A. Androecium structural phyllotaxy (binary) (D2d)	Mesangiospermae	whorled / spiral	whorled	1	whorled	0.9622 (0.8742-1.0000)	*		Mesangiospermae	whorled	spiral	0.999	whorled	0.9656 (0.9965-1.0000)	*		Mesangiospermae	whorled / spiral	whorled	1	whorled	0.9627 (0.9209-1.0000)	*		Mesangiospermae	whorled	whorled	1	whorled	0.9563 (0.6913-1.0000)	**		Mesangiospermae	whorled	spiral	0.9992	whorled	0.9476 (0.3523-1.0000)	*		Mesangiospermae	whorled / spiral	spiral	0.9794	whorled	0.9807 (0.9999-1.0000)	*		Mesangiospermae
331_A. Number of androecium structural whorls (3-state) (D2c)	Mesangiospermae	more than two (>2)	more than two (>2)	0.9993	two (2)	0.5857 (0.0123-1.0000)	*		Mesangiospermae	more than two (>2)	more than two (>2)	0.9961	two (2)	0.6499 (0.0119-1.0000)	*		Mesangiospermae	more than two (>2)	two (2)	0.9999	two (2)	0.517 (0.0081-1.0000)	*		Mesangiospermae	more than two (>2)	more than two (>2)	0.9994	two (2)	0.6088 (0.0122-1.0000)	*		Mesangiospermae	more than two (>2)	two (2)	0.9999	two (2)	0.563 (0.0116-1.0000)	*		Mesangiospermae	more than two (>2)	more than two (>2)	0.9882	two (2)	0.6891 (0.0222-1.0000)	*		Mesangiospermae
332_A. Androecium structural merism (4-state) (D2c)	Mesangiospermae	trimerous	trimerous	1	trimerous	0.9134 (0.3421-1.0000)	*		Mesangiospermae	trimerous / pentamerous	trimerous	0.9993	trimerous	0.8502 (0.1793-1.0000)	*		Mesangiospermae	trimerous	tetramerous	0.9215	trimerous	0.9384 (0.7262-1.0000)	*		Mesangiospermae	trimerous	trimerous	0.5059	trimerous	0.8928 (0.192-1.000)	*		Mesangiospermae	trimerous / tetramerous / pentamerous	tetramerous	0.6945	trimerous	0.8687 (0.2302-1.0000)	*		Mesangiospermae	trimerous	trimerous	1	trimerous	0.8708 (0.4366-1.0000)	*		Mesangiospermae
332_B. Androecium structural merism (3-state) (D2c)	Mesangiospermae	trimerous	trimerous	1	trimerous	0.7009 (0-1)	*		Mesangiospermae	trimerous / tetramerous / pentamerous	trimerous	0.9992	pentamerous	1 (1-1)	*		Mesangiospermae	trimerous	trimerous	1	trimerous	0.464 (0-1)	*		Mesangiospermae	trimerous	trimerous	1	pentamerous	0.8895 (0.0004-1.0000)	*		Mesangiospermae	trimerous / tetramerous / pentamerous	trimerous	0.9985	pentamerous	1 (1-1)	*		Mesangiospermae	trimerous	trimerous	1	pentamerous	0.8864 (0.0025-1.0000)	*		Mesangiospermae
305_A. Filament (binary) (D2d)	Mesangiospermae	laminar (wide)	laminar (wide)	0.9823	typical (narrow)	0.9 (0.3224-1.0000)	*		Mesangiospermae	laminar (wide) / typical (narrow)	laminar (wide)	0.9923	typical (narrow)	0.8653 (0.1022-0.9994)	*		Mesangiospermae	laminar (wide)	laminar (wide)	0.9854	typical (narrow)	0.8426 (0.1629-0.9985)	*		Mesangiospermae	laminar (wide) / typical (narrow)	laminar (wide)	0.9926	typical (narrow)	0.8797 (0.1255-0.9995)	*		Mesangiospermae	laminar (wide) / typical (narrow)	laminar (wide)	0.9953	typical (narrow)	0.8869 (0.1119-0.9995)	*		Mesangiospermae	laminar (wide)	laminar (wide)	0.7691	typical (narrow)	0.9164 (0.5701-0.9982)	*		Mesangiospermae
311_A. Anther orientation (D2d)	Mesangiospermae	introrse / extrorse	introrse	0.9986	introrse	0.8192 (0.5722-1.0000)	*		Mesangiospermae	introrse / extrorse	introrse	0.9984	introrse	0.7815 (0.4853-1.0000)	*		Mesangiospermae	introrse / extrorse	introrse	0.998	introrse	0.7743 (0.536-1.000)	*		Mesangiospermae	introrse	introrse	0.9985	introrse	0.7724 (0.5636-1.0000)	**		Mesangiospermae	introrse / extrorse	introrse	0.9985	introrse	0.756 (0.5037-1.0000)	*		Mesangiospermae	introrse / extrorse	introrse	0.9161	introrse	0.8002 (0.6205-0.9904)	*		Mesangiospermae
312_A. Anther attachment (binary) (D2d)	Mesangiospermae	basifixed	basifixed	0.9991	basifixed	0.9989 (0.9971-1.0000)	***		Mesangiospermae	basifixed	basifixed	0.9986	basifixed	0.9981 (0.9949-1.0000)	***		Mesangiospermae	basifixed	basifixed	0.9991	basifixed	0.999 (0.9975-1.0000)	***		Mesangiospermae	basifixed	basifixed	0.9995	basifixed	0.9991 (0.9981-1.0000)	***		Mesangiospermae	basifixed	basifixed	0.9994	basifixed	0.9989 (0.9968-1.0000)	***		Mesangiospermae	basifixed	basifixed	0.9575	basifixed	0.9901 (0.9691-1.0000)	***		Mesangiospermae
313_A. Anther dehiscence (3-state) (D2d)	Mesangiospermae	longitudinal slit	longitudinal slit	1	longitudinal slit	0.8233 (0-1)	*		Mesangiospermae	longitudinal slit	longitudinal slit	1	longitudinal slit	0.8099 (0-1)	*		Mesangiospermae	longitudinal slit	longitudinal slit	1	longitudinal slit	0.7242 (0-1)	*		Mesangiospermae	longitudinal slit	longitudinal slit	1	longitudinal slit	0.5687 (0-1)	*		Mesangiospermae	longitudinal slit	longitudinal slit	1	longitudinal slit	0.8667 (0-1)	*		Mesangiospermae	longitudinal slit	longitudinal slit	0.9999	longitudinal slit	0.8111 (0-1)	*		Mesangiospermae
401_B. Number of structural carpels (5-state) (D2c)	Mesangiospermae	more than five (>5)	more than five (>5)	1	more than five (>5)	0.987 (0.9545-1.0000)	***		Mesangiospermae	more than five (>5)	more than five (>5)	1	more than five (>5)	0.9733 (0.8823-1.0000)	**		Mesangiospermae	more than five (>5)	more than five (>5)	1	more than five (>5)	0.9694 (0.9044-1.0000)	**		Mesangiospermae	more than five (>5)	more than five (>5)	1	more than five (>5)	0.9451 (0.7781-1.0000)	**		Mesangiospermae	more than five (>5)	more than five (>5)	1	more than five (>5)	0.9668 (0.8777-1.0000)	**		Mesangiospermae	more than five (>5)	more than five (>5)	0.9999	more than five (>5)	0.9599 (0.8325-1.0000)	**		Mesangiospermae
400_A. Gynoecium phyllotaxy (D2d)	Mesangiospermae	whorled / spiral	spiral	1	spiral	0.9412 (0.6466-1.0000)	*		Mesangiospermae	whorled	spiral	1	spiral	0.9448 (0.7013-1.0000)	*		Mesangiospermae	whorled / spiral	spiral	1	spiral	0.947 (0.7232-1.0000)	*		Mesangiospermae	whorled	spiral	1	spiral	0.9448 (0.7226-1.0000)	*		Mesangiospermae	whorled	spiral	1	spiral	0.9473 (0.7276-1.0000)	*		Mesangiospermae	whorled / spiral	spiral	0.9999	spiral	0.8781 (0.0001-1.0000)	*		Mesangiospermae
403_A. Fusion of ovaries (binary) (D2c)	Mesangiospermae	free (<5%) / fused (>5%)	free (<5%)	1	free (<5%)	0.7244 (0-1)	*		Mesangiospermae	fused (>5%)	free (<5%)	1	free (<5%)	0.5446 (0-1)	*		Mesangiospermae	free (<5%) / fused (>5%)	free (<5%)	1	free (<5%)	0.6667 (0-1)	*		Mesangiospermae	free (<5%) / fused (>5%)	free (<5%)	1	free (<5%)	0.594 (0.0000-0.9996)	*		Mesangiospermae	fused (>5%)	free (<5%)	1	free (<5%)	0.6008 (0-1)	*		Mesangiospermae	free (<5%) / fused (>5%)	free (<5%)	0.9998	fused (>5%)	0.7471 (0.0005-1.0000)	*		Mesangiospermae
411_A. Number of ovules per functional carpel (3-state) (D2c)	Mesangiospermae	one (1)	three or more (>2)	1	three or more (>2)	0.9977 (0.9987-1.0000)	**		Mesangiospermae	one (1)	three or more (>2)	1	three or more (>2)	0.9919 (0.9977-1.0000)	**		Mesangiospermae	one (1)	three or more (>2)	1	three or more (>2)	0.9994 (0.9986-1.0000)	**		Mesangiospermae	one (1)	three or more (>2)	1	three or more (>2)	0.9965 (0.9985-1.0000)	**		Mesangiospermae	one (1) / three or more (>2)	three or more (>2)	1	three or more (>2)	0.9986 (0.9965-1.0000)	**		Mesangiospermae	one (1)	three or more (>2)	1	three or more (>2)	0.993 (0.9928-1.0000)	**		Mesangiospermae
100_A. Functional sex of flowers (D2d)	Magnoliidae	bisexual	bisexual	1	bisexual	0.9998 (0.9989-1.0000)	***		Magnoliidae	bisexual	bisexual	1	bisexual	0.9998 (0.999-1.000)	***		Magnoliidae	bisexual	bisexual	1	bisexual	0.9995 (0.9984-1.0000)	***		Magnoliidae	bisexual	bisexual	1	bisexual	0.9995 (0.9983-1.0000)	***		Magnoliidae	bisexual	bisexual	1	bisexual	0.9998 (0.999-1.000)	***		Magnoliidae	bisexual	bisexual	1	bisexual	0.9995 (0.9969-1.0000)	***		Magnoliidae
100_B. Structural sex of flowers (D2d)	Magnoliidae	bisexual	bisexual	1	bisexual	0.9999 (0.9999-1.0000)	***		Magnoliidae	bisexual	bisexual	1	bisexual	0.9999 (0.9999-1.0000)	***		Magnoliidae	bisexual	bisexual	1	bisexual	0.9999 (0.9999-1.0000)	***		Magnoliidae	bisexual	bisexual	1	bisexual	0.9999 (0.9999-1.0000)	***		Magnoliidae	bisexual	bisexual	1	bisexual	0.9999 (0.9999-1.0000)	***		Magnoliidae	bisexual	bisexual	0.9998	bisexual	0.9996 (0.9992-1.0000)	***		Magnoliidae
102_B. Ovary position (binary) (D2d)	Magnoliidae	superior	superior	0.9997	superior	0.9956 (0.9914-0.9987)	***		Magnoliidae	superior	superior	0.9997	superior	0.9953 (0.9910-0.9989)	***		Magnoliidae	superior	superior	0.9997	superior	0.9961 (0.9921-0.9995)	***		Magnoliidae	superior	superior	0.9998	superior	0.9944 (0.9898-0.9988)	***		Magnoliidae	superior	superior	0.9999	superior	0.9951 (0.9915-0.9986)	***		Magnoliidae	superior	superior	0.9966	superior	0.9893 (0.9778-0.9977)	***		Magnoliidae
201_A. Perianth presence (D2c)	Magnoliidae	present	present	1	present	0.9994 (1-1)	***		Magnoliidae	present	present	1	present	1 (1-1)	***		Magnoliidae	present	present	1	present	1 (1-1)	***		Magnoliidae	present	present	1	present	1 (1-1)	***		Magnoliidae	present	present	1	present	1 (1-1)	***		Magnoliidae	present	present	1	present	1 (0.9999-1.0000)	***		Magnoliidae
201_B. Number of perianth parts (3-state) (D2c)	Magnoliidae	six to ten (6-10)	more than ten (>10)	0.9999	more than ten (>10)	0.9277 (0.8073-1.0000)	*		Magnoliidae	six to ten (6-10)	more than ten (>10)	0.9998	more than ten (>10)	0.9102 (0.8225-0.9999)	*		Magnoliidae	six to ten (6-10)	more than ten (>10)	0.9999	more than ten (>10)	0.9012 (0.7668-1.0000)	*		Magnoliidae	six to ten (6-10)	more than ten (>10)	0.9999	more than ten (>10)	0.9027 (0.7259-1.0000)	*		Magnoliidae	six to ten (6-10)	more than ten (>10)	0.9997	more than ten (>10)	0.928 (0.8235-1.0000)	*		Magnoliidae	six to ten (6-10)	more than ten (>10)	0.9994	more than ten (>10)	0.8636 (0.4387-1.0000)	*		Magnoliidae
201_C. Number of perianth parts (binary) (D2c)	Magnoliidae	one to six (1-6) / more than six (>6)	more than six (>6)	1	more than six (>6)	0.9996 (1-1)	**		Magnoliidae	one to six (1-6) / more than six (>6)	more than six (>6)	0.9998	more than six (>6)	0.9957 (0.9702-1.0000)	**		Magnoliidae	one to six (1-6) / more than six (>6)	more than six (>6)	1	more than six (>6)	0.9938 (0.9624-1.0000)	**		Magnoliidae	one to six (1-6) / more than six (>6)	more than six (>6)	1	more than six (>6)	0.9907 (0.9382-1.0000)	*		Magnoliidae	one to six (1-6) / more than six (>6)	more than six (>6)	0.9999	more than six (>6)	0.9831 (0.9496-1.0000)	*		Magnoliidae	one to six (1-6) / more than six (>6)	more than six (>6)	1	more than six (>6)	0.9988 (1-1)	**		Magnoliidae
230_A. Perianth phyllotaxy (binary) (D2d)	Magnoliidae	whorled	spiral	0.9997	whorled	0.7925 (0.0046-1.0000)	*		Magnoliidae	whorled	spiral	1	whorled	0.7193 (0.0041-1.0000)	*		Magnoliidae	whorled	spiral	0.9997	whorled	0.831 (0.0053-1.0000)	*		Magnoliidae	whorled	spiral	0.9998	whorled	0.7627 (0.0044-1.0000)	*		Magnoliidae	whorled	spiral	0.9985	whorled	0.7479 (0.0044-1.0000)	*		Magnoliidae	whorled	spiral	0.9975	whorled	0.8494 (0.0094-1.0000)	*		Magnoliidae
231_A. Number of perianth whorls (D2c)	Magnoliidae	one (1) / two (2) / more than two (>2)	more than two (>2)	1	more than two (>2)	0.9914 (0.9812-0.9995)	**		Magnoliidae	more than two (>2)	more than two (>2)	1	more than two (>2)	0.9905 (0.9808-0.9995)	***		Magnoliidae	one (1) / two (2) / more than two (>2)	more than two (>2)	1	more than two (>2)	0.9936 (0.9855-0.9997)	**		Magnoliidae	more than two (>2)	more than two (>2)	1	more than two (>2)	0.9915 (0.9803-0.9996)	***		Magnoliidae	more than two (>2)	more than two (>2)	1	more than two (>2)	0.9922 (0.9806-0.9995)	***		Magnoliidae	one (1) / two (2) / more than two (>2)	more than two (>2)	1	more than two (>2)	0.9815 (0.9620-0.9988)	**		Magnoliidae
232_A. Perianth merism (4-state) (D2c)	Magnoliidae	trimerous	trimerous	1	trimerous	0.9636 (0.9285-0.9923)	**		Magnoliidae	trimerous	trimerous	1	trimerous	0.9559 (0.9085-0.9960)	**		Magnoliidae	trimerous	trimerous	1	trimerous	0.9589 (0.9121-0.9892)	**		Magnoliidae	trimerous	trimerous	1	trimerous	0.9677 (0.9276-0.9915)	**		Magnoliidae	trimerous	trimerous	1	trimerous	0.9693 (0.9381-0.9915)	**		Magnoliidae	trimerous	trimerous	1	trimerous	0.9279 (0.8569-0.9830)	**		Magnoliidae
232_B. Perianth merism (3-state) (D2c)	Magnoliidae	trimerous	trimerous	1	trimerous	0.9861 (0.9856-0.9967)	***		Magnoliidae	trimerous	trimerous	1	trimerous	0.9112 (0.000-0.995)	*		Magnoliidae	trimerous	trimerous	1	trimerous	0.9868 (0.9857-0.9961)	***		Magnoliidae	trimerous	trimerous	1	trimerous	0.9895 (0.9896-0.9975)	***		Magnoliidae	trimerous	trimerous	1	trimerous	0.9867 (0.9867-0.9974)	***		Magnoliidae	trimerous	trimerous	1	trimerous	0.9723 (0.9737-0.9951)	***		Magnoliidae
234_A. Perianth differentiation (binary) (D2d)	Magnoliidae	undifferentiated / differentiated	undifferentiated	0.9999	undifferentiated	0.9793 (0.9324-0.9998)	*		Magnoliidae	undifferentiated / differentiated	undifferentiated	0.9999	undifferentiated	0.9812 (0.9195-1.0000)	*		Magnoliidae	undifferentiated / differentiated	undifferentiated	0.9999	undifferentiated	0.9798 (0.9212-0.9999)	*		Magnoliidae	undifferentiated / differentiated	undifferentiated	0.9999	undifferentiated	0.9811 (0.9238-0.9999)	*		Magnoliidae	undifferentiated / differentiated	undifferentiated	1	undifferentiated	0.9776 (0.9221-0.9999)	*		Magnoliidae	undifferentiated / differentiated	undifferentiated	0.9993	undifferentiated	0.9536 (0.8817-0.9991)	*		Magnoliidae
204_A. Fusion of perianth (D2c)	Magnoliidae	free (<5%)	free (<5%)	0.9998	free (<5%)	0.9805 (0.9600-0.9964)	***		Magnoliidae	free (<5%)	free (<5%)	0.9999	free (<5%)	0.9853 (0.9696-0.9971)	***		Magnoliidae	free (<5%)	free (<5%)	0.9999	free (<5%)	0.9828 (0.9646-0.9973)	***		Magnoliidae	free (<5%)	free (<5%)	0.9999	free (<5%)	0.9849 (0.9680-0.9974)	***		Magnoliidae	free (<5%)	free (<5%)	0.9999	free (<5%)	0.9825 (0.9639-0.9961)	***		Magnoliidae	free (<5%)	free (<5%)	0.9988	free (<5%)	0.9772 (0.9455-0.9972)	**		Magnoliidae
207_A. Symmetry of perianth (binary) (D2d)	Magnoliidae	actinomorphic	actinomorphic	1	actinomorphic	0.9872 (0.9576-1.0000)	***		Magnoliidae	actinomorphic	actinomorphic	1	actinomorphic	0.9924 (0.9708-1.0000)	***		Magnoliidae	actinomorphic	actinomorphic	1	actinomorphic	0.9955 (0.9792-1.0000)	***		Magnoliidae	actinomorphic	actinomorphic	1	actinomorphic	0.9931 (0.9728-1.0000)	***		Magnoliidae	actinomorphic	actinomorphic	1	actinomorphic	0.9958 (0.9794-1.0000)	***		Magnoliidae	actinomorphic	actinomorphic	0.9997	actinomorphic	0.9768 (0.9202-1.0000)	**		Magnoliidae
301_B. Number of fertile stamens (3-state) (D2c)	Magnoliidae	more than ten (>10)	more than ten (>10)	1	more than ten (>10)	0.9697 (0.6231-1.0000)	**		Magnoliidae	more than ten (>10)	more than ten (>10)	0.9999	more than ten (>10)	0.8974 (0.5384-1.0000)	**		Magnoliidae	more than ten (>10)	more than ten (>10)	1	more than ten (>10)	0.9195 (0.544-1.000)	**		Magnoliidae	more than ten (>10)	more than ten (>10)	1	more than ten (>10)	0.9054 (0.5606-1.0000)	**		Magnoliidae	six to ten (6-10)	more than ten (>10)	0.9999	more than ten (>10)	0.7756 (0.4792-1.0000)	*		Magnoliidae	more than ten (>10)	more than ten (>10)	0.9998	more than ten (>10)	0.9225 (0.5789-1.0000)	**		Magnoliidae
301_C. Number of fertile stamens (binary) (D2c)	Magnoliidae	one to six (1-6) / more than six (>6)	more than six (>6)	1	more than six (>6)	1 (0.9998-1.0000)	**		Magnoliidae	one to six (1-6) / more than six (>6)	more than six (>6)	1	more than six (>6)	0.9999 (0.9995-1.0000)	**		Magnoliidae	one to six (1-6) / more than six (>6)	more than six (>6)	1	more than six (>6)	0.9999 (0.9997-1.0000)	**		Magnoliidae	one to six (1-6) / more than six (>6)	more than six (>6)	1	more than six (>6)	0.9999 (0.9998-1.0000)	**		Magnoliidae	one to six (1-6) / more than six (>6)	more than six (>6)	1	more than six (>6)	0.9999 (0.9997-1.0000)	**		Magnoliidae	one to six (1-6) / more than six (>6)	more than six (>6)	1	more than six (>6)	0.9999 (0.9998-1.0000)	**		Magnoliidae
330_A. Androecium structural phyllotaxy (binary) (D2d)	Magnoliidae	whorled / spiral	whorled	1	whorled	0.9174 (0.0209-1.0000)	*		Magnoliidae	whorled	spiral	0.9982	whorled	0.912 (0.0682-1.0000)	*		Magnoliidae	whorled / spiral	whorled	1	whorled	0.924 (0.0274-1.0000)	*		Magnoliidae	whorled	whorled	1	whorled	0.9278 (0.0137-1.0000)	*		Magnoliidae	whorled	spiral	0.9982	whorled	0.895 (0.0087-1.0000)	*		Magnoliidae	whorled / spiral	spiral	0.982	whorled	0.9089 (0.8213-1.0000)	*		Magnoliidae
331_A. Number of androecium structural whorls (3-state) (D2c)	Magnoliidae	more than two (>2)	more than two (>2)	0.9991	more than two (>2)	0.7957 (0.0000-0.9964)	*		Magnoliidae	more than two (>2)	more than two (>2)	0.9963	more than two (>2)	0.6979 (0.0000-0.9968)	*		Magnoliidae	more than two (>2)	two (2)	0.9917	more than two (>2)	0.8254 (0.0000-0.9974)	*		Magnoliidae	more than two (>2)	more than two (>2)	0.9991	more than two (>2)	0.8167 (0.0000-0.9967)	*		Magnoliidae	more than two (>2)	two (2)	0.9917	more than two (>2)	0.8273 (0.0000-0.9971)	*		Magnoliidae	more than two (>2)	more than two (>2)	0.99	more than two (>2)	0.5151 (0.0059-0.9975)	*		Magnoliidae
332_A. Androecium structural merism (4-state) (D2c)	Magnoliidae	trimerous	trimerous	1	trimerous	0.8785 (0.6656-1.0000)	**		Magnoliidae	trimerous	trimerous	1	trimerous	0.843 (0.6559-0.9999)	**		Magnoliidae	trimerous	tetramerous	0.8424	trimerous	0.9063 (0.6716-1.0000)	*		Magnoliidae	trimerous	trimerous	0.5057	trimerous	0.8396 (0.6548-0.9999)	**		Magnoliidae	trimerous	trimerous	0.678	trimerous	0.8738 (0.6601-0.9999)	**		Magnoliidae	trimerous	trimerous	1	trimerous	0.8298 (0.6264-1.0000)	**		Magnoliidae
332_B. Androecium structural merism (3-state) (D2c)	Magnoliidae	trimerous	trimerous	1	trimerous	0.7007 (0.0000-0.9998)	*		Magnoliidae	trimerous	trimerous	1	tetramerous	0.9005 (0.8459-0.9491)	*		Magnoliidae	trimerous	trimerous	1	tetramerous	0.4912 (0.0000-0.9881)	*		Magnoliidae	trimerous	trimerous	1	tetramerous	0.906 (0.8507-0.9949)	*		Magnoliidae	trimerous	trimerous	1	tetramerous	0.9035 (0.8437-0.9517)	*		Magnoliidae	trimerous	trimerous	1	tetramerous	0.8915 (0.8412-0.9943)	*		Magnoliidae
305_A. Filament (binary) (D2d)	Magnoliidae	laminar (wide)	laminar (wide)	0.9971	laminar (wide)	0.9476 (0.8963-0.9998)	**		Magnoliidae	laminar (wide)	laminar (wide)	0.9985	laminar (wide)	0.9527 (0.9024-1.0000)	**		Magnoliidae	laminar (wide)	laminar (wide)	0.9976	laminar (wide)	0.9563 (0.9057-1.0000)	**		Magnoliidae	laminar (wide)	laminar (wide)	0.9985	laminar (wide)	0.9476 (0.896-1.000)	**		Magnoliidae	laminar (wide)	laminar (wide)	0.9978	laminar (wide)	0.9404 (0.8808-1.0000)	**		Magnoliidae	laminar (wide)	laminar (wide)	0.9794	laminar (wide)	0.9458 (0.8943-0.9995)	**		Magnoliidae
311_A. Anther orientation (D2d)	Magnoliidae	extrorse	extrorse	0.8271	extrorse	0.9669 (0.9601-1.0000)	***		Magnoliidae	extrorse	extrorse	0.6989	extrorse	0.9446 (0.5782-0.9999)	**		Magnoliidae	extrorse	extrorse	0.8122	extrorse	0.9692 (0.9522-0.9999)	***		Magnoliidae	extrorse	extrorse	0.7688	extrorse	0.9675 (0.6873-0.9999)	**		Magnoliidae	extrorse	extrorse	0.7251	extrorse	0.9542 (0.5336-0.9999)	**		Magnoliidae	extrorse	extrorse	0.9217	extrorse	0.9944 (0.9895-0.9999)	***		Magnoliidae
312_A. Anther attachment (binary) (D2d)	Magnoliidae	basifixed	basifixed	0.9989	basifixed	0.9797 (0.9559-0.9962)	***		Magnoliidae	basifixed	basifixed	0.999	basifixed	0.9771 (0.9535-0.9947)	***		Magnoliidae	basifixed	basifixed	0.9989	basifixed	0.9764 (0.9522-0.9941)	***		Magnoliidae	basifixed	basifixed	0.999	basifixed	0.9803 (0.9603-0.9954)	***		Magnoliidae	basifixed	basifixed	0.9993	basifixed	0.9765 (0.9531-0.9944)	***		Magnoliidae	basifixed	basifixed	0.9812	basifixed	0.9617 (0.9097-0.9961)	**		Magnoliidae
313_A. Anther dehiscence (3-state) (D2d)	Magnoliidae	longitudinal slit	longitudinal slit	1	longitudinal slit	0.8004 (0.0000-0.9999)	*		Magnoliidae	longitudinal slit	longitudinal slit	0.998	longitudinal slit	0.7801 (0.0000-0.9999)	*		Magnoliidae	longitudinal slit	longitudinal slit	1	longitudinal slit	0.7004 (0.0000-0.9999)	*		Magnoliidae	longitudinal slit	longitudinal slit	0.9992	longitudinal slit	0.5489 (0.0000-0.9999)	*		Magnoliidae	longitudinal slit	longitudinal slit	0.9994	longitudinal slit	0.8292 (0.0000-0.9999)	*		Magnoliidae	longitudinal slit	longitudinal slit	0.9687	longitudinal slit	0.7776 (0.0000-0.9998)	*		Magnoliidae
401_B. Number of structural carpels (5-state) (D2c)	Magnoliidae	more than five (>5)	more than five (>5)	1	more than five (>5)	0.9907 (0.9787-1.0000)	***		Magnoliidae	more than five (>5)	more than five (>5)	1	more than five (>5)	0.9837 (0.9643-0.9998)	***		Magnoliidae	more than five (>5)	more than five (>5)	1	more than five (>5)	0.983 (0.9562-0.9999)	***		Magnoliidae	more than five (>5)	more than five (>5)	1	more than five (>5)	0.9726 (0.9300-0.9997)	**		Magnoliidae	more than five (>5)	more than five (>5)	1	more than five (>5)	0.9798 (0.9594-0.9998)	***		Magnoliidae	more than five (>5)	more than five (>5)	0.9999	more than five (>5)	0.9753 (0.9165-1.0000)	**		Magnoliidae
400_A. Gynoecium phyllotaxy (D2d)	Magnoliidae	whorled / spiral	spiral	1	spiral	0.974 (0.9849-1.0000)	**		Magnoliidae	whorled	spiral	0.9998	spiral	0.9765 (0.9859-1.0000)	**		Magnoliidae	whorled / spiral	spiral	1	spiral	0.9767 (0.9861-1.0000)	**		Magnoliidae	whorled	spiral	1	spiral	0.9755 (0.9869-1.0000)	**		Magnoliidae	whorled	spiral	0.9997	spiral	0.9768 (0.9871-1.0000)	**		Magnoliidae	whorled / spiral	spiral	0.9997	spiral	0.935 (0.389-1.000)	*		Magnoliidae
403_A. Fusion of ovaries (binary) (D2c)	Magnoliidae	free (<5%) / fused (>5%)	free (<5%)	0.9999	free (<5%)	0.7785 (0.1413-1.0000)	*		Magnoliidae	fused (>5%)	free (<5%)	0.9999	free (<5%)	0.6366 (0.1289-1.0000)	*		Magnoliidae	free (<5%) / fused (>5%)	free (<5%)	0.9999	free (<5%)	0.7356 (0.1395-1.0000)	*		Magnoliidae	free (<5%) / fused (>5%)	free (<5%)	0.9999	free (<5%)	0.6757 (0.1395-1.0000)	*		Magnoliidae	fused (>5%)	free (<5%)	0.9999	free (<5%)	0.6825 (0.1257-1.0000)	*		Magnoliidae	free (<5%) / fused (>5%)	free (<5%)	0.9993	fused (>5%)	0.5934 (0.0000-0.8856)	*		Magnoliidae
411_A. Number of ovules per functional carpel (3-state) (D2c)	Magnoliidae	one (1)	three or more (>2)	0.9997	three or more (>2)	0.9718 (0.7997-1.0000)	*		Magnoliidae	one (1)	three or more (>2)	0.9998	three or more (>2)	0.9315 (0.7469-1.0000)	*		Magnoliidae	one (1)	three or more (>2)	0.9996	three or more (>2)	0.9454 (0.7791-1.0000)	*		Magnoliidae	one (1)	three or more (>2)	0.9998	three or more (>2)	0.8874 (0.7406-1.0000)	*		Magnoliidae	one (1) / three or more (>2)	three or more (>2)	1	three or more (>2)	0.9194 (0.8017-1.0000)	*		Magnoliidae	one (1)	three or more (>2)	0.9979	three or more (>2)	0.9602 (0.7309-1.0000)	*		Magnoliidae
100_A. Functional sex of flowers (D2d)	Monocotyledoneae	bisexual	bisexual	1	bisexual	0.9992 (0.9956-1.0000)	***		Monocotyledoneae	bisexual	bisexual	1	bisexual	0.9995 (0.997-1.000)	***		Monocotyledoneae	bisexual	bisexual	1	bisexual	0.9983 (0.995-1.000)	***		Monocotyledoneae	bisexual	bisexual	1	bisexual	0.9986 (0.9961-1.0000)	***		Monocotyledoneae	bisexual	bisexual	1	bisexual	0.9995 (0.9967-1.0000)	***		Monocotyledoneae	bisexual	bisexual	1	bisexual	0.9981 (0.9883-1.0000)	***		Monocotyledoneae
100_B. Structural sex of flowers (D2d)	Monocotyledoneae	bisexual	bisexual	1	bisexual	0.9991 (0.9983-0.9997)	***		Monocotyledoneae	bisexual	bisexual	1	bisexual	0.9991 (0.9984-0.9997)	***		Monocotyledoneae	bisexual	bisexual	1	bisexual	0.9991 (0.9983-0.9997)	***		Monocotyledoneae	bisexual	bisexual	1	bisexual	0.9992 (0.9985-0.9997)	***		Monocotyledoneae	bisexual	bisexual	1	bisexual	0.9992 (0.9987-0.9997)	***		Monocotyledoneae	bisexual	bisexual	0.9998	bisexual	0.9975 (0.9948-0.9997)	***		Monocotyledoneae
102_B. Ovary position (binary) (D2d)	Monocotyledoneae	superior	superior	0.999	superior	0.9891 (0.9781-0.9972)	***		Monocotyledoneae	superior	superior	0.9987	superior	0.9911 (0.9827-0.9979)	***		Monocotyledoneae	superior	superior	0.9983	superior	0.9901 (0.9791-0.9972)	***		Monocotyledoneae	superior	superior	0.999	superior	0.9911 (0.9818-0.9977)	***		Monocotyledoneae	superior	superior	0.9994	superior	0.9943 (0.9883-0.9982)	***		Monocotyledoneae	superior	superior	0.9937	superior	0.9733 (0.9513-0.9927)	***		Monocotyledoneae
201_A. Perianth presence (D2c)	Monocotyledoneae	present	present	1	present	0.9993 (0.9998-1.0000)	***		Monocotyledoneae	present	present	1	present	0.9999 (0.9998-1.0000)	***		Monocotyledoneae	present	present	1	present	0.9999 (0.9998-1.0000)	***		Monocotyledoneae	present	present	1	present	0.9999 (0.9999-1.0000)	***		Monocotyledoneae	present	present	1	present	0.9999 (0.9998-1.0000)	***		Monocotyledoneae	present	present	1	present	0.9998 (0.9994-1.0000)	***		Monocotyledoneae
201_B. Number of perianth parts (3-state) (D2c)	Monocotyledoneae	six to ten (6-10)	six to ten (6-10)	0.5214	six to ten (6-10)	0.9769 (0.9398-0.9987)	**		Monocotyledoneae	six to ten (6-10)	six to ten (6-10)	0.6087	six to ten (6-10)	0.985 (0.9583-0.9983)	***		Monocotyledoneae	six to ten (6-10)	six to ten (6-10)	0.5684	six to ten (6-10)	0.861 (0.4936-0.9981)	*		Monocotyledoneae	six to ten (6-10)	six to ten (6-10)	0.5866	six to ten (6-10)	0.9769 (0.9293-0.9991)	**		Monocotyledoneae	six to ten (6-10)	six to ten (6-10)	0.5913	six to ten (6-10)	0.9759 (0.9389-0.9986)	**		Monocotyledoneae	six to ten (6-10)	six to ten (6-10)	0.5374	six to ten (6-10)	0.9594 (0.8867-0.9973)	**		Monocotyledoneae
201_C. Number of perianth parts (binary) (D2c)	Monocotyledoneae	one to six (1-6)	one to six (1-6)	0.7668	one to six (1-6)	0.9977 (0.9961-0.9991)	***		Monocotyledoneae	one to six (1-6)	one to six (1-6)	0.813	one to six (1-6)	0.9979 (0.9963-0.9993)	***		Monocotyledoneae	one to six (1-6)	one to six (1-6)	0.7998	one to six (1-6)	0.9979 (0.9964-0.9992)	***		Monocotyledoneae	one to six (1-6)	one to six (1-6)	0.8013	one to six (1-6)	0.9979 (0.9965-0.9992)	***		Monocotyledoneae	one to six (1-6)	one to six (1-6)	0.8097	one to six (1-6)	0.9984 (0.9971-0.9994)	***		Monocotyledoneae	one to six (1-6)	one to six (1-6)	0.7415	one to six (1-6)	0.9939 (0.9881-0.9984)	***		Monocotyledoneae
230_A. Perianth phyllotaxy (binary) (D2d)	Monocotyledoneae	whorled	spiral	0.5628	whorled	0.9907 (0.9431-1.0000)	*		Monocotyledoneae	whorled	spiral	0.6562	whorled	0.9901 (0.9505-1.0000)	*		Monocotyledoneae	whorled	spiral	0.5143	whorled	0.993 (0.9522-1.0000)	*		Monocotyledoneae	whorled	spiral	0.5013	whorled	0.991 (0.9498-1.0000)	*		Monocotyledoneae	whorled	whorled	0.5128	whorled	0.991 (0.9521-1.0000)	***		Monocotyledoneae	whorled	spiral	0.514	whorled	0.9889 (0.918-1.000)	*		Monocotyledoneae
231_A. Number of perianth whorls (D2c)	Monocotyledoneae	two (2)	two (2)	0.6869	two (2)	0.9948 (0.9846-0.9993)	***		Monocotyledoneae	two (2)	two (2)	0.739	two (2)	0.9953 (0.9864-0.9993)	***		Monocotyledoneae	two (2)	two (2)	0.7194	two (2)	0.9953 (0.9875-0.9993)	***		Monocotyledoneae	two (2)	two (2)	0.724	two (2)	0.9946 (0.9854-0.9992)	***		Monocotyledoneae	two (2)	two (2)	0.7319	two (2)	0.9943 (0.9858-0.9992)	***		Monocotyledoneae	two (2)	two (2)	0.6671	two (2)	0.9833 (0.9518-0.9986)	***		Monocotyledoneae
232_A. Perianth merism (4-state) (D2c)	Monocotyledoneae	trimerous	trimerous	1	trimerous	0.9966 (0.9929-0.9994)	***		Monocotyledoneae	trimerous	trimerous	1	trimerous	0.9965 (0.9933-0.9993)	***		Monocotyledoneae	trimerous	trimerous	1	trimerous	0.9973 (0.9944-0.9994)	***		Monocotyledoneae	trimerous	trimerous	1	trimerous	0.9974 (0.9950-0.9993)	***		Monocotyledoneae	trimerous	trimerous	1	trimerous	0.9968 (0.9940-0.9993)	***		Monocotyledoneae	trimerous	trimerous	1	trimerous	0.99 (0.9793-0.9987)	***		Monocotyledoneae
232_B. Perianth merism (3-state) (D2c)	Monocotyledoneae	trimerous	trimerous	1	trimerous	0.994 (0.9965-0.9994)	***		Monocotyledoneae	trimerous	trimerous	1	trimerous	0.9188 (0.0000-0.9989)	*		Monocotyledoneae	trimerous	trimerous	1	trimerous	0.9962 (0.9972-0.9994)	***		Monocotyledoneae	trimerous	trimerous	1	trimerous	0.9958 (0.9975-0.9994)	***		Monocotyledoneae	trimerous	trimerous	1	trimerous	0.9948 (0.9974-0.9994)	***		Monocotyledoneae	trimerous	trimerous	1	trimerous	0.9843 (0.9895-0.9990)	***		Monocotyledoneae
234_A. Perianth differentiation (binary) (D2d)	Monocotyledoneae	undifferentiated	undifferentiated	1	undifferentiated	0.9986 (0.9963-0.9998)	***		Monocotyledoneae	undifferentiated	undifferentiated	1	undifferentiated	0.9988 (0.9969-1.0000)	***		Monocotyledoneae	undifferentiated	undifferentiated	1	undifferentiated	0.9986 (0.9966-0.9999)	***		Monocotyledoneae	undifferentiated	undifferentiated	1	undifferentiated	0.9987 (0.9970-0.9999)	***		Monocotyledoneae	undifferentiated	undifferentiated	1	undifferentiated	0.9988 (0.9972-0.9999)	***		Monocotyledoneae	undifferentiated	undifferentiated	0.9999	undifferentiated	0.9943 (0.9863-0.9997)	***		Monocotyledoneae
204_A. Fusion of perianth (D2c)	Monocotyledoneae	free (<5%)	free (<5%)	0.9999	free (<5%)	0.9919 (0.9839-0.9978)	***		Monocotyledoneae	free (<5%)	free (<5%)	0.9999	free (<5%)	0.9936 (0.9885-0.9976)	***		Monocotyledoneae	free (<5%)	free (<5%)	0.9999	free (<5%)	0.9921 (0.9854-0.9975)	***		Monocotyledoneae	free (<5%)	free (<5%)	1	free (<5%)	0.9926 (0.9871-0.9974)	***		Monocotyledoneae	free (<5%)	free (<5%)	1	free (<5%)	0.9922 (0.9855-0.9976)	***		Monocotyledoneae	free (<5%)	free (<5%)	0.9995	free (<5%)	0.9815 (0.9584-0.9976)	***		Monocotyledoneae
207_A. Symmetry of perianth (binary) (D2d)	Monocotyledoneae	actinomorphic	actinomorphic	0.9997	actinomorphic	0.9168 (0.8277-0.9910)	**		Monocotyledoneae	actinomorphic	actinomorphic	0.9997	actinomorphic	0.9448 (0.8787-0.9921)	**		Monocotyledoneae	actinomorphic	actinomorphic	0.9997	actinomorphic	0.9504 (0.8805-0.9917)	**		Monocotyledoneae	actinomorphic	actinomorphic	0.9998	actinomorphic	0.9504 (0.8851-0.9929)	**		Monocotyledoneae	actinomorphic	actinomorphic	0.9997	actinomorphic	0.9593 (0.9006-0.9897)	**		Monocotyledoneae	actinomorphic	actinomorphic	0.9983	actinomorphic	0.8502 (0.6999-0.9889)	**		Monocotyledoneae
301_B. Number of fertile stamens (3-state) (D2c)	Monocotyledoneae	six to ten (6-10)	six to ten (6-10)	0.5076	six to ten (6-10)	0.9898 (0.9791-0.9961)	***		Monocotyledoneae	six to ten (6-10)	six to ten (6-10)	0.58	six to ten (6-10)	0.99 (0.9797-0.9965)	***		Monocotyledoneae	six to ten (6-10)	six to ten (6-10)	0.5427	six to ten (6-10)	0.9892 (0.9765-0.9966)	***		Monocotyledoneae	six to ten (6-10)	six to ten (6-10)	0.5554	six to ten (6-10)	0.9903 (0.9793-0.9967)	***		Monocotyledoneae	six to ten (6-10)	six to ten (6-10)	0.5681	six to ten (6-10)	0.9906 (0.9789-0.9968)	***		Monocotyledoneae	six to ten (6-10)	six to ten (6-10)	0.5016	six to ten (6-10)	0.9865 (0.9713-0.9964)	***		Monocotyledoneae
301_C. Number of fertile stamens (binary) (D2c)	Monocotyledoneae	one to six (1-6)	more than six (>6)	0.5966	one to six (1-6)	0.9768 (0.9453-0.9948)	*		Monocotyledoneae	one to six (1-6)	one to six (1-6)	0.5065	one to six (1-6)	0.9782 (0.9497-0.9953)	**		Monocotyledoneae	one to six (1-6)	more than six (>6)	0.5725	one to six (1-6)	0.975 (0.9426-0.9943)	*		Monocotyledoneae	one to six (1-6)	more than six (>6)	0.5202	one to six (1-6)	0.9803 (0.9577-0.9947)	*		Monocotyledoneae	one to six (1-6)	more than six (>6)	0.5187	one to six (1-6)	0.9778 (0.9500-0.9953)	*		Monocotyledoneae	one to six (1-6)	more than six (>6)	0.5454	one to six (1-6)	0.9706 (0.9256-0.9953)	*		Monocotyledoneae
330_A. Androecium structural phyllotaxy (binary) (D2d)	Monocotyledoneae	whorled	whorled	1	whorled	0.9986 (0.9921-1.0000)	***		Monocotyledoneae	whorled	whorled	0.5917	whorled	0.9989 (0.9967-1.0000)	***		Monocotyledoneae	whorled	whorled	1	whorled	0.9987 (0.9938-1.0000)	***		Monocotyledoneae	whorled	whorled	1	whorled	0.9986 (0.99-1.00)	***		Monocotyledoneae	whorled	whorled	0.5792	whorled	0.9984 (0.9865-1.0000)	***		Monocotyledoneae	whorled	whorled	0.5901	whorled	0.9986 (0.9993-1.0000)	***		Monocotyledoneae
331_A. Number of androecium structural whorls (3-state) (D2c)	Monocotyledoneae	two (2)	more than two (>2)	0.9746	two (2)	0.8585 (0.5222-1.0000)	*		Monocotyledoneae	two (2)	more than two (>2)	0.9638	two (2)	0.8966 (0.604-1.000)	*		Monocotyledoneae	two (2)	two (2)	1	two (2)	0.8448 (0.5214-1.0000)	**		Monocotyledoneae	two (2)	more than two (>2)	0.9699	two (2)	0.8837 (0.5859-1.0000)	*		Monocotyledoneae	two (2)	two (2)	1	two (2)	0.8757 (0.5977-1.0000)	**		Monocotyledoneae	two (2)	more than two (>2)	0.9386	two (2)	0.8179 (0.5247-1.0000)	*		Monocotyledoneae
332_A. Androecium structural merism (4-state) (D2c)	Monocotyledoneae	trimerous	trimerous	1	trimerous	0.8533 (0.1463-1.0000)	*		Monocotyledoneae	trimerous	trimerous	1	trimerous	0.8327 (0.0853-1.0000)	*		Monocotyledoneae	trimerous	trimerous	0.5155	trimerous	0.9 (0.5815-1.0000)	**		Monocotyledoneae	trimerous	trimerous	0.5069	trimerous	0.8313 (0.0749-1.0000)	*		Monocotyledoneae	trimerous	trimerous	0.7897	trimerous	0.8648 (0.195-1.000)	*		Monocotyledoneae	trimerous	trimerous	1	trimerous	0.7936 (0.397-1.000)	*		Monocotyledoneae
332_B. Androecium structural merism (3-state) (D2c)	Monocotyledoneae	trimerous	trimerous	1	trimerous	0.9986 (0.9945-1.0000)	***		Monocotyledoneae	trimerous	trimerous	1	trimerous	0.9973 (0.9952-0.9991)	***		Monocotyledoneae	trimerous	trimerous	1	trimerous	0.9982 (0.9954-1.0000)	***		Monocotyledoneae	trimerous	trimerous	1	trimerous	0.9976 (0.9957-0.9992)	***		Monocotyledoneae	trimerous	trimerous	1	trimerous	0.9974 (0.9956-0.9992)	***		Monocotyledoneae	trimerous	trimerous	1	trimerous	0.993 (0.9850-0.9992)	***		Monocotyledoneae
305_A. Filament (binary) (D2d)	Monocotyledoneae	typical (narrow)	laminar (wide)	0.5715	typical (narrow)	0.9793 (0.8683-1.0000)	*		Monocotyledoneae	typical (narrow)	laminar (wide)	0.8479	typical (narrow)	0.9604 (0.7213-0.9997)	*		Monocotyledoneae	typical (narrow)	laminar (wide)	0.564	typical (narrow)	0.9595 (0.7334-0.9997)	*		Monocotyledoneae	typical (narrow)	laminar (wide)	0.867	typical (narrow)	0.959 (0.7025-0.9996)	*		Monocotyledoneae	typical (narrow)	laminar (wide)	0.851	typical (narrow)	0.9654 (0.7559-0.9996)	*		Monocotyledoneae	typical (narrow)	typical (narrow)	0.6794	typical (narrow)	0.983 (0.9130-0.9997)	**		Monocotyledoneae
311_A. Anther orientation (D2d)	Monocotyledoneae	introrse	introrse	0.9988	introrse	0.9772 (0.9516-0.9974)	***		Monocotyledoneae	introrse	introrse	0.9976	introrse	0.9824 (0.9658-0.9981)	***		Monocotyledoneae	introrse	introrse	0.9985	introrse	0.9799 (0.9606-0.9974)	***		Monocotyledoneae	introrse	introrse	0.9988	introrse	0.9802 (0.9638-0.9975)	***		Monocotyledoneae	introrse	introrse	0.9939	introrse	0.9815 (0.9653-0.9981)	***		Monocotyledoneae	introrse	introrse	0.9488	introrse	0.9628 (0.9287-0.9907)	**		Monocotyledoneae
312_A. Anther attachment (binary) (D2d)	Monocotyledoneae	basifixed	basifixed	0.994	basifixed	0.9113 (0.8649-0.9533)	**		Monocotyledoneae	basifixed	basifixed	0.9939	basifixed	0.9194 (0.8771-0.9570)	**		Monocotyledoneae	basifixed	basifixed	0.9932	basifixed	0.9091 (0.8660-0.9503)	**		Monocotyledoneae	basifixed	basifixed	0.9958	basifixed	0.9343 (0.8995-0.9624)	**		Monocotyledoneae	basifixed	basifixed	0.9964	basifixed	0.9212 (0.8843-0.9546)	**		Monocotyledoneae	basifixed	basifixed	0.9448	basifixed	0.8656 (0.7861-0.9506)	**		Monocotyledoneae
313_A. Anther dehiscence (3-state) (D2d)	Monocotyledoneae	longitudinal slit	longitudinal slit	1	longitudinal slit	0.9774 (0.8471-1.0000)	**		Monocotyledoneae	longitudinal slit	longitudinal slit	1	longitudinal slit	0.9796 (0.8704-1.0000)	**		Monocotyledoneae	longitudinal slit	longitudinal slit	1	longitudinal slit	0.9658 (0.8349-1.0000)	**		Monocotyledoneae	longitudinal slit	longitudinal slit	1	longitudinal slit	0.9516 (0.8324-1.0000)	**		Monocotyledoneae	longitudinal slit	longitudinal slit	1	longitudinal slit	0.9858 (0.8863-1.0000)	**		Monocotyledoneae	longitudinal slit	longitudinal slit	1	longitudinal slit	0.9655 (0.7742-1.0000)	**		Monocotyledoneae
401_B. Number of structural carpels (5-state) (D2c)	Monocotyledoneae	three (3)	more than five (>5)	0.936	three (3)	0.874 (0.4532-0.9966)	*		Monocotyledoneae	three (3)	more than five (>5)	0.8475	three (3)	0.8295 (0.4871-0.9967)	*		Monocotyledoneae	three (3)	more than five (>5)	0.9133	three (3)	0.8184 (0.4642-0.9961)	*		Monocotyledoneae	three (3)	more than five (>5)	0.8134	three (3)	0.8687 (0.5739-0.9957)	*		Monocotyledoneae	three (3)	more than five (>5)	0.8204	three (3)	0.8776 (0.5682-0.9963)	*		Monocotyledoneae	three (3)	more than five (>5)	0.7937	three (3)	0.8281 (0.4577-0.9950)	*		Monocotyledoneae
400_A. Gynoecium phyllotaxy (D2d)	Monocotyledoneae	whorled	spiral	0.5494	whorled	0.9681 (0.9275-1.0000)	*		Monocotyledoneae	whorled	whorled	0.5472	whorled	0.9755 (0.9447-1.0000)	**		Monocotyledoneae	whorled	spiral	0.5045	whorled	0.9704 (0.9335-1.0000)	*		Monocotyledoneae	whorled	whorled	0.519	whorled	0.9748 (0.9434-1.0000)	**		Monocotyledoneae	whorled	whorled	0.5317	whorled	0.9759 (0.9448-1.0000)	**		Monocotyledoneae	whorled	whorled	0.5215	whorled	0.9561 (0.8977-1.0000)	**		Monocotyledoneae
403_A. Fusion of ovaries (binary) (D2c)	Monocotyledoneae	fused (>5%)	free (<5%)	0.9545	fused (>5%)	0.8118 (0.4916-1.0000)	*		Monocotyledoneae	fused (>5%)	free (<5%)	0.9297	fused (>5%)	0.8875 (0.6081-1.0000)	*		Monocotyledoneae	fused (>5%)	free (<5%)	0.9461	fused (>5%)	0.8344 (0.5283-1.0000)	*		Monocotyledoneae	fused (>5%)	free (<5%)	0.928	fused (>5%)	0.8777 (0.607-1.000)	*		Monocotyledoneae	fused (>5%)	free (<5%)	0.9344	fused (>5%)	0.8728 (0.5943-1.0000)	*		Monocotyledoneae	fused (>5%)	free (<5%)	0.9088	fused (>5%)	0.9339 (0.6244-1.0000)	*		Monocotyledoneae
411_A. Number of ovules per functional carpel (3-state) (D2c)	Monocotyledoneae	one (1) / three or more (>2)	three or more (>2)	1	three or more (>2)	0.9962 (0.9781-1.0000)	**		Monocotyledoneae	one (1) / three or more (>2)	three or more (>2)	1	three or more (>2)	0.9916 (0.9784-1.0000)	**		Monocotyledoneae	one (1) / three or more (>2)	three or more (>2)	0.9999	three or more (>2)	0.9945 (0.9762-1.0000)	**		Monocotyledoneae	three or more (>2)	three or more (>2)	1	three or more (>2)	0.9906 (0.9782-1.0000)	***		Monocotyledoneae	one (1) / three or more (>2)	three or more (>2)	1	three or more (>2)	0.9922 (0.9802-1.0000)	**		Monocotyledoneae	one (1) / three or more (>2)	three or more (>2)	0.9998	three or more (>2)	0.9911 (0.9555-1.0000)	**		Monocotyledoneae
100_A. Functional sex of flowers (D2d)	Eudicotyledoneae	bisexual	bisexual	1	bisexual	0.9998 (0.9991-1.0000)	***		Eudicotyledoneae	bisexual	bisexual	1	bisexual	0.9999 (0.9991-1.0000)	***		Eudicotyledoneae	bisexual	bisexual	1	bisexual	0.9996 (0.9987-1.0000)	***		Eudicotyledoneae	bisexual	bisexual	1	bisexual	0.9996 (0.9989-1.0000)	***		Eudicotyledoneae	bisexual	bisexual	1	bisexual	0.9999 (0.9992-1.0000)	***		Eudicotyledoneae	bisexual	bisexual	1	bisexual	0.9995 (0.9965-1.0000)	***		Eudicotyledoneae
100_B. Structural sex of flowers (D2d)	Eudicotyledoneae	bisexual	bisexual	1	bisexual	0.9999 (0.9998-1.0000)	***		Eudicotyledoneae	bisexual	bisexual	1	bisexual	0.9999 (0.9998-1.0000)	***		Eudicotyledoneae	bisexual	bisexual	1	bisexual	0.9999 (0.9999-1.0000)	***		Eudicotyledoneae	bisexual	bisexual	1	bisexual	0.9999 (0.9999-1.0000)	***		Eudicotyledoneae	bisexual	bisexual	1	bisexual	0.9999 (0.9999-1.0000)	***		Eudicotyledoneae	bisexual	bisexual	0.9999	bisexual	0.9996 (0.9992-1.0000)	***		Eudicotyledoneae
102_B. Ovary position (binary) (D2d)	Eudicotyledoneae	superior	superior	1	superior	0.9998 (0.9997-1.0000)	***		Eudicotyledoneae	superior	superior	1	superior	0.9998 (0.9997-1.0000)	***		Eudicotyledoneae	superior	superior	1	superior	0.9998 (0.9997-1.0000)	***		Eudicotyledoneae	superior	superior	1	superior	0.9998 (0.9996-1.0000)	***		Eudicotyledoneae	superior	superior	1	superior	0.9999 (0.9997-1.0000)	***		Eudicotyledoneae	superior	superior	0.9999	superior	0.9989 (0.9976-0.9999)	***		Eudicotyledoneae
201_A. Perianth presence (D2c)	Eudicotyledoneae	present	present	1	present	0.9997 (0.9999-1.0000)	***		Eudicotyledoneae	present	present	1	present	1 (1-1)	***		Eudicotyledoneae	present	present	1	present	1 (1-1)	***		Eudicotyledoneae	present	present	1	present	1 (1-1)	***		Eudicotyledoneae	present	present	1	present	1 (1-1)	***		Eudicotyledoneae	present	present	1	present	0.9999 (0.9998-1.0000)	***		Eudicotyledoneae
201_B. Number of perianth parts (3-state) (D2c)	Eudicotyledoneae	six to ten (6-10)	more than ten (>10)	0.995	more than ten (>10)	0.6213 (0.0802-0.9460)	*		Eudicotyledoneae	six to ten (6-10)	more than ten (>10)	0.9977	more than ten (>10)	0.452 (0.0849-0.9584)	*		Eudicotyledoneae	six to ten (6-10)	more than ten (>10)	0.9952	more than ten (>10)	0.4873 (0.0701-0.9545)	*		Eudicotyledoneae	six to ten (6-10)	more than ten (>10)	0.998	more than ten (>10)	0.6333 (0.0989-0.9759)	*		Eudicotyledoneae	one to five (1-5) / six to ten (6-10) / more than ten (>10)	more than ten (>10)	0.9978	more than ten (>10)	0.6053 (0.1021-0.9595)	*		Eudicotyledoneae	six to ten (6-10)	more than ten (>10)	0.9866	more than ten (>10)	0.4977 (0.0000-0.9009)	*		Eudicotyledoneae
201_C. Number of perianth parts (binary) (D2c)	Eudicotyledoneae	one to six (1-6)	more than six (>6)	1	more than six (>6)	0.9957 (1-1)	**		Eudicotyledoneae	one to six (1-6)	more than six (>6)	1	more than six (>6)	0.943 (0.6163-1.0000)	*		Eudicotyledoneae	one to six (1-6)	more than six (>6)	1	more than six (>6)	0.9545 (0.7092-1.0000)	*		Eudicotyledoneae	one to six (1-6)	more than six (>6)	1	more than six (>6)	0.9384 (0.6105-1.0000)	*		Eudicotyledoneae	one to six (1-6)	more than six (>6)	1	more than six (>6)	0.9328 (0.816-1.000)	*		Eudicotyledoneae	one to six (1-6)	more than six (>6)	0.9999	more than six (>6)	0.9929 (1-1)	**		Eudicotyledoneae
230_A. Perianth phyllotaxy (binary) (D2d)	Eudicotyledoneae	whorled	spiral	0.9996	whorled	0.7972 (0.0037-1.0000)	*		Eudicotyledoneae	whorled	spiral	1	whorled	0.7252 (0.0022-1.0000)	*		Eudicotyledoneae	whorled	spiral	0.9996	whorled	0.8341 (0.004-1.000)	*		Eudicotyledoneae	whorled	spiral	0.9997	whorled	0.7672 (0.0028-1.0000)	*		Eudicotyledoneae	whorled	spiral	0.9998	whorled	0.7518 (0.0024-1.0000)	*		Eudicotyledoneae	whorled	spiral	0.998	whorled	0.8544 (0.0073-1.0000)	*		Eudicotyledoneae
231_A. Number of perianth whorls (D2c)	Eudicotyledoneae	two (2) / more than two (>2)	more than two (>2)	0.9905	more than two (>2)	0.8228 (0.6606-0.9676)	*		Eudicotyledoneae	more than two (>2)	more than two (>2)	0.9976	more than two (>2)	0.8236 (0.6590-0.9724)	**		Eudicotyledoneae	two (2) / more than two (>2)	more than two (>2)	0.992	more than two (>2)	0.8954 (0.7526-0.9857)	*		Eudicotyledoneae	more than two (>2)	more than two (>2)	0.9984	more than two (>2)	0.8629 (0.7272-0.9664)	**		Eudicotyledoneae	more than two (>2)	more than two (>2)	0.9982	more than two (>2)	0.8427 (0.6890-0.9509)	**		Eudicotyledoneae	two (2) / more than two (>2)	more than two (>2)	0.984	more than two (>2)	0.7592 (0.5482-0.9366)	*		Eudicotyledoneae
232_A. Perianth merism (4-state) (D2c)	Eudicotyledoneae	dimerous / trimerous	trimerous	0.9626	dimerous	0.7485 (0.2692-0.9965)	*		Eudicotyledoneae	dimerous / trimerous	trimerous	0.9685	dimerous	0.6819 (0.1598-0.9948)	*		Eudicotyledoneae	dimerous / trimerous	trimerous	0.9676	dimerous	0.6949 (0.1910-0.9939)	*		Eudicotyledoneae	dimerous / trimerous	trimerous	0.9775	dimerous	0.7186 (0.2299-0.9951)	*		Eudicotyledoneae	dimerous / trimerous	trimerous	0.9742	dimerous	0.6524 (0.1613-0.9940)	*		Eudicotyledoneae	dimerous / trimerous	trimerous	0.8914	dimerous	0.6755 (0.1568-0.9787)	*		Eudicotyledoneae
232_B. Perianth merism (3-state) (D2c)	Eudicotyledoneae	trimerous	trimerous	0.9759	pentamerous	0.607 (0.4594-0.7474)	*		Eudicotyledoneae	trimerous	trimerous	0.9794	pentamerous	0.588 (0.4333-1.0000)	*		Eudicotyledoneae	trimerous	trimerous	0.9795	pentamerous	0.5801 (0.4381-0.7220)	*		Eudicotyledoneae	trimerous	trimerous	0.9823	pentamerous	0.5715 (0.4298-0.7042)	*		Eudicotyledoneae	trimerous	trimerous	0.9831	pentamerous	0.6144 (0.4677-0.7390)	*		Eudicotyledoneae	trimerous	trimerous	0.9574	pentamerous	0.5397 (0.3711-0.6754)	*		Eudicotyledoneae
234_A. Perianth differentiation (binary) (D2d)	Eudicotyledoneae	undifferentiated	undifferentiated	0.9898	differentiated	0.5181 (0.1076-0.9628)	*		Eudicotyledoneae	undifferentiated	undifferentiated	0.9918	undifferentiated	0.6328 (0.0876-1.0000)	*		Eudicotyledoneae	undifferentiated	undifferentiated	0.9899	undifferentiated	0.5595 (0.0805-1.0000)	*		Eudicotyledoneae	undifferentiated / differentiated	undifferentiated	0.9914	undifferentiated	0.5199 (0.0500-0.9357)	*		Eudicotyledoneae	undifferentiated	undifferentiated	0.9915	undifferentiated	0.5577 (0.106-1.000)	*		Eudicotyledoneae	undifferentiated	undifferentiated	0.9759	differentiated	0.5352 (0.1142-0.9000)	*		Eudicotyledoneae
204_A. Fusion of perianth (D2c)	Eudicotyledoneae	free (<5%)	free (<5%)	1	free (<5%)	0.9986 (0.9969-0.9998)	***		Eudicotyledoneae	free (<5%)	free (<5%)	1	free (<5%)	0.9989 (0.9975-0.9999)	***		Eudicotyledoneae	free (<5%)	free (<5%)	1	free (<5%)	0.999 (0.9978-0.9998)	***		Eudicotyledoneae	free (<5%)	free (<5%)	1	free (<5%)	0.9989 (0.9975-0.9998)	***		Eudicotyledoneae	free (<5%)	free (<5%)	1	free (<5%)	0.9989 (0.9973-0.9999)	***		Eudicotyledoneae	free (<5%)	free (<5%)	0.9998	free (<5%)	0.995 (0.9868-0.9999)	***		Eudicotyledoneae
207_A. Symmetry of perianth (binary) (D2d)	Eudicotyledoneae	actinomorphic	actinomorphic	1	actinomorphic	0.9904 (0.9733-1.0000)	***		Eudicotyledoneae	actinomorphic	actinomorphic	1	actinomorphic	0.9939 (0.9812-1.0000)	***		Eudicotyledoneae	actinomorphic	actinomorphic	1	actinomorphic	0.9973 (0.9883-1.0000)	***		Eudicotyledoneae	actinomorphic	actinomorphic	1	actinomorphic	0.9932 (0.9776-1.0000)	***		Eudicotyledoneae	actinomorphic	actinomorphic	1	actinomorphic	0.9974 (0.9886-1.0000)	***		Eudicotyledoneae	actinomorphic	actinomorphic	0.9997	actinomorphic	0.9761 (0.926-1.000)	**		Eudicotyledoneae
301_B. Number of fertile stamens (3-state) (D2c)	Eudicotyledoneae	one to five (1-5) / six to ten (6-10)	more than ten (>10)	1	more than ten (>10)	0.9252 (0.0133-1.0000)	*		Eudicotyledoneae	one to five (1-5)	more than ten (>10)	1	more than ten (>10)	0.7671 (0.0098-1.0000)	*		Eudicotyledoneae	one to five (1-5) / six to ten (6-10)	more than ten (>10)	1	more than ten (>10)	0.8171 (0.01-1.00)	*		Eudicotyledoneae	one to five (1-5)	more than ten (>10)	1	more than ten (>10)	0.7774 (0.0099-1.0000)	*		Eudicotyledoneae	one to five (1-5) / six to ten (6-10)	more than ten (>10)	1	more than ten (>10)	0.5355 (0.0105-1.0000)	*		Eudicotyledoneae	one to five (1-5) / six to ten (6-10)	more than ten (>10)	0.9999	more than ten (>10)	0.8097 (0.0184-1.0000)	*		Eudicotyledoneae
301_C. Number of fertile stamens (binary) (D2c)	Eudicotyledoneae	one to six (1-6)	more than six (>6)	0.9998	more than six (>6)	0.9911 (0.9618-1.0000)	**		Eudicotyledoneae	one to six (1-6)	more than six (>6)	0.9999	more than six (>6)	0.9913 (0.9642-1.0000)	**		Eudicotyledoneae	one to six (1-6)	more than six (>6)	0.9998	more than six (>6)	0.9896 (0.9561-1.0000)	**		Eudicotyledoneae	one to six (1-6)	more than six (>6)	0.9999	more than six (>6)	0.9902 (0.9594-1.0000)	**		Eudicotyledoneae	one to six (1-6)	more than six (>6)	0.9999	more than six (>6)	0.9908 (0.961-1.000)	**		Eudicotyledoneae	one to six (1-6)	more than six (>6)	0.9986	more than six (>6)	0.9905 (0.9588-1.0000)	**		Eudicotyledoneae
330_A. Androecium structural phyllotaxy (binary) (D2d)	Eudicotyledoneae	whorled	whorled	1	whorled	0.9756 (0.9624-1.0000)	***		Eudicotyledoneae	whorled	spiral	0.9786	whorled	0.9768 (0.9973-1.0000)	*		Eudicotyledoneae	whorled	whorled	1	whorled	0.9753 (0.9781-1.0000)	***		Eudicotyledoneae	whorled	whorled	1	whorled	0.9694 (0.8609-1.0000)	**		Eudicotyledoneae	whorled	spiral	0.9844	whorled	0.9641 (0.7061-1.0000)	*		Eudicotyledoneae	whorled	spiral	0.8243	whorled	0.9892 (0.9999-1.0000)	*		Eudicotyledoneae
331_A. Number of androecium structural whorls (3-state) (D2c)	Eudicotyledoneae	two (2) / more than two (>2)	more than two (>2)	0.9095	two (2)	0.8915 (0.6489-1.0000)	*		Eudicotyledoneae	more than two (>2)	more than two (>2)	0.907	two (2)	0.8999 (0.6307-1.0000)	*		Eudicotyledoneae	two (2) / more than two (>2)	two (2)	1	two (2)	0.8874 (0.6473-1.0000)	*		Eudicotyledoneae	more than two (>2)	more than two (>2)	0.9322	two (2)	0.8915 (0.6294-1.0000)	*		Eudicotyledoneae	more than two (>2)	two (2)	1	two (2)	0.8846 (0.6386-1.0000)	*		Eudicotyledoneae	two (2) / more than two (>2)	more than two (>2)	0.8079	two (2)	0.8136 (0.558-1.000)	*		Eudicotyledoneae
332_A. Androecium structural merism (4-state) (D2c)	Eudicotyledoneae	trimerous / tetramerous / pentamerous	trimerous	0.8426	tetramerous	0.8568 (0.0184-0.9984)	*		Eudicotyledoneae	trimerous / pentamerous	trimerous	0.8545	tetramerous	0.8544 (0.3312-0.9985)	*		Eudicotyledoneae	trimerous / tetramerous / pentamerous	tetramerous	0.9628	tetramerous	0.6781 (0.0000-0.9934)	*		Eudicotyledoneae	trimerous / tetramerous / pentamerous	tetramerous	0.541	tetramerous	0.8516 (0.0000-0.9942)	*		Eudicotyledoneae	trimerous / tetramerous / pentamerous	tetramerous	0.9312	tetramerous	0.8103 (0.3854-0.9991)	*		Eudicotyledoneae	trimerous / tetramerous / pentamerous	trimerous	0.8208	tetramerous	0.8992 (0.6068-0.9966)	*		Eudicotyledoneae
332_B. Androecium structural merism (3-state) (D2c)	Eudicotyledoneae	trimerous / tetramerous / pentamerous	trimerous	0.9066	tetramerous	0.6682 (0.0000-0.9902)	*		Eudicotyledoneae	trimerous / tetramerous / pentamerous	trimerous	0.8461	pentamerous	1 (1-1)	*		Eudicotyledoneae	trimerous / tetramerous / pentamerous	trimerous	0.8422	pentamerous	0.5356 (0-1)	*		Eudicotyledoneae	trimerous / tetramerous / pentamerous	trimerous	0.9174	pentamerous	0.9711 (0.7415-1.0000)	*		Eudicotyledoneae	trimerous / tetramerous / pentamerous	trimerous	0.8633	pentamerous	1 (1-1)	*		Eudicotyledoneae	trimerous / tetramerous / pentamerous	trimerous	0.8752	pentamerous	0.9661 (0.6973-1.0000)	*		Eudicotyledoneae
305_A. Filament (binary) (D2d)	Eudicotyledoneae	typical (narrow)	typical (narrow)	0.7656	typical (narrow)	0.9947 (0.9677-1.0000)	***		Eudicotyledoneae	typical (narrow)	typical (narrow)	0.6209	typical (narrow)	0.9913 (0.9542-1.0000)	***		Eudicotyledoneae	typical (narrow)	typical (narrow)	0.7744	typical (narrow)	0.9908 (0.9527-1.0000)	***		Eudicotyledoneae	typical (narrow)	typical (narrow)	0.5676	typical (narrow)	0.9905 (0.9445-1.0000)	**		Eudicotyledoneae	typical (narrow)	typical (narrow)	0.5337	typical (narrow)	0.9901 (0.9548-1.0000)	***		Eudicotyledoneae	typical (narrow)	typical (narrow)	0.9083	typical (narrow)	0.9949 (0.9687-1.0000)	***		Eudicotyledoneae
311_A. Anther orientation (D2d)	Eudicotyledoneae	introrse / extrorse	introrse	0.9976	introrse	0.9398 (0.8903-1.0000)	*		Eudicotyledoneae	introrse / extrorse	introrse	0.997	introrse	0.9319 (0.8732-1.0000)	*		Eudicotyledoneae	introrse / extrorse	introrse	0.9967	introrse	0.9282 (0.8729-1.0000)	*		Eudicotyledoneae	extrorse	introrse	0.9822	introrse	0.9186 (0.862-1.000)	*		Eudicotyledoneae	introrse / extrorse	introrse	0.9978	introrse	0.9282 (0.8854-1.0000)	*		Eudicotyledoneae	introrse / extrorse	introrse	0.9321	introrse	0.8861 (0.8092-0.9615)	*		Eudicotyledoneae
312_A. Anther attachment (binary) (D2d)	Eudicotyledoneae	basifixed	basifixed	0.8364	basifixed	0.7813 (0.5655-0.9617)	**		Eudicotyledoneae	basifixed	basifixed	0.8331	basifixed	0.8034 (0.6025-0.9689)	**		Eudicotyledoneae	basifixed	basifixed	0.8303	basifixed	0.8203 (0.6282-0.9780)	**		Eudicotyledoneae	basifixed	basifixed	0.8848	basifixed	0.8395 (0.6657-0.9749)	**		Eudicotyledoneae	basifixed	basifixed	0.8849	basifixed	0.8245 (0.6405-0.9758)	**		Eudicotyledoneae	basifixed	basifixed	0.6833	basifixed	0.7565 (0.5558-0.9640)	**		Eudicotyledoneae
313_A. Anther dehiscence (3-state) (D2d)	Eudicotyledoneae	longitudinal slit	longitudinal slit	1	longitudinal slit	0.8238 (0-1)	*		Eudicotyledoneae	longitudinal slit	longitudinal slit	1	longitudinal slit	0.8103 (0-1)	*		Eudicotyledoneae	longitudinal slit	longitudinal slit	1	longitudinal slit	0.7249 (0-1)	*		Eudicotyledoneae	longitudinal slit	longitudinal slit	1	longitudinal slit	0.5689 (0-1)	*		Eudicotyledoneae	longitudinal slit	longitudinal slit	1	longitudinal slit	0.8671 (0-1)	*		Eudicotyledoneae	longitudinal slit	longitudinal slit	1	longitudinal slit	0.8135 (0-1)	*		Eudicotyledoneae
401_B. Number of structural carpels (5-state) (D2c)	Eudicotyledoneae	more than five (>5)	more than five (>5)	0.9988	more than five (>5)	0.5489 (0.0794-0.9359)	*		Eudicotyledoneae	more than five (>5)	more than five (>5)	0.9962	four or five (4-5)	0.594 (0.2317-0.9635)	*		Eudicotyledoneae	more than five (>5)	more than five (>5)	0.9984	four or five (4-5)	0.6614 (0.2182-0.9743)	*		Eudicotyledoneae	more than five (>5)	more than five (>5)	0.997	four or five (4-5)	0.547 (0.1851-0.9600)	*		Eudicotyledoneae	more than five (>5)	more than five (>5)	0.9956	four or five (4-5)	0.6027 (0.2485-0.9777)	*		Eudicotyledoneae	more than five (>5)	more than five (>5)	0.9913	four or five (4-5)	0.5412 (0.1458-0.9532)	*		Eudicotyledoneae
400_A. Gynoecium phyllotaxy (D2d)	Eudicotyledoneae	whorled	spiral	0.9993	spiral	0.8864 (0.4537-1.0000)	*		Eudicotyledoneae	whorled	spiral	0.9997	spiral	0.8993 (0.5378-1.0000)	*		Eudicotyledoneae	whorled	spiral	0.9994	spiral	0.8966 (0.5161-1.0000)	*		Eudicotyledoneae	whorled	spiral	0.9997	spiral	0.898 (0.5316-1.0000)	*		Eudicotyledoneae	whorled	spiral	0.9997	spiral	0.9031 (0.5499-1.0000)	*		Eudicotyledoneae	whorled	spiral	0.9984	spiral	0.8296 (0.0000-0.9989)	*		Eudicotyledoneae
403_A. Fusion of ovaries (binary) (D2c)	Eudicotyledoneae	free (<5%) / fused (>5%)	free (<5%)	0.9993	free (<5%)	0.716 (0.0365-1.0000)	*		Eudicotyledoneae	fused (>5%)	free (<5%)	0.9991	free (<5%)	0.5462 (0.0128-0.9944)	*		Eudicotyledoneae	fused (>5%)	free (<5%)	0.9989	free (<5%)	0.6526 (0.0128-0.9967)	*		Eudicotyledoneae	free (<5%) / fused (>5%)	free (<5%)	0.9994	free (<5%)	0.5917 (0.0097-0.9941)	*		Eudicotyledoneae	fused (>5%)	free (<5%)	0.9992	free (<5%)	0.6071 (0.0147-0.9963)	*		Eudicotyledoneae	free (<5%) / fused (>5%)	free (<5%)	0.9971	fused (>5%)	0.6626 (0.0073-0.9520)	*		Eudicotyledoneae
411_A. Number of ovules per functional carpel (3-state) (D2c)	Eudicotyledoneae	three or more (>2)	three or more (>2)	1	three or more (>2)	0.9799 (0.8532-1.0000)	**		Eudicotyledoneae	three or more (>2)	three or more (>2)	1	three or more (>2)	0.959 (0.8639-1.0000)	**		Eudicotyledoneae	three or more (>2)	three or more (>2)	1	three or more (>2)	0.9702 (0.8852-1.0000)	**		Eudicotyledoneae	one (1) / two (2) / three or more (>2)	three or more (>2)	1	three or more (>2)	0.9429 (0.8599-1.0000)	*		Eudicotyledoneae	three or more (>2)	three or more (>2)	1	three or more (>2)	0.956 (0.8895-1.0000)	**		Eudicotyledoneae	three or more (>2)	three or more (>2)	0.9999	three or more (>2)	0.9701 (0.8486-1.0000)	**		Eudicotyledoneae
100_A. Functional sex of flowers (D2d)	Commelinidae	bisexual	bisexual	1	bisexual	0.998 (0.9891-1.0000)	***		Commelinidae	bisexual	bisexual	0.9999	bisexual	0.9915 (0.9457-1.0000)	**		Commelinidae	bisexual	bisexual	1	bisexual	0.9807 (0.9332-1.0000)	**		Commelinidae	bisexual	bisexual	1	bisexual	0.9752 (0.9283-1.0000)	**		Commelinidae	bisexual	bisexual	0.9999	bisexual	0.9919 (0.9473-1.0000)	**		Commelinidae	bisexual	bisexual	1	bisexual	0.998 (0.988-1.000)	***		Commelinidae
100_B. Structural sex of flowers (D2d)	Commelinidae	bisexual	bisexual	0.9999	bisexual	0.9996 (0.9992-1.0000)	***		Commelinidae	bisexual	bisexual	1	bisexual	0.9996 (0.999-1.000)	***		Commelinidae	bisexual	bisexual	0.9999	bisexual	0.9996 (0.9991-1.0000)	***		Commelinidae	bisexual	bisexual	0.9999	bisexual	0.9996 (0.9991-1.0000)	***		Commelinidae	bisexual	bisexual	1	bisexual	0.9996 (0.9992-1.0000)	***		Commelinidae	bisexual	bisexual	0.9999	bisexual	0.9996 (0.9992-1.0000)	***		Commelinidae
102_B. Ovary position (binary) (D2d)	Commelinidae	superior	superior	0.8959	superior	0.9987 (0.9971-0.9998)	***		Commelinidae	superior	superior	0.7957	superior	0.9964 (0.9919-0.9995)	***		Commelinidae	superior	superior	0.766	superior	0.9968 (0.9942-0.9990)	***		Commelinidae	superior	superior	0.8139	superior	0.9966 (0.9938-0.9990)	***		Commelinidae	superior	superior	0.8973	superior	0.9956 (0.9917-0.9992)	***		Commelinidae	superior	superior	0.7959	superior	0.9981 (0.9960-0.9997)	***		Commelinidae
201_A. Perianth presence (D2c)	Commelinidae	present	present	1	present	0.9995 (0.9999-1.0000)	***		Commelinidae	present	present	1	present	1 (0.9999-1.0000)	***		Commelinidae	present	present	1	present	1 (0.9999-1.0000)	***		Commelinidae	present	present	1	present	1 (0.9999-1.0000)	***		Commelinidae	present	present	1	present	1 (0.9999-1.0000)	***		Commelinidae	present	present	1	present	1 (0.9999-1.0000)	***		Commelinidae
201_B. Number of perianth parts (3-state) (D2c)	Commelinidae	six to ten (6-10)	six to ten (6-10)	0.9999	six to ten (6-10)	0.9603 (0.7976-0.9999)	**		Commelinidae	six to ten (6-10)	six to ten (6-10)	0.9999	six to ten (6-10)	0.9808 (0.9402-0.9997)	**		Commelinidae	six to ten (6-10)	six to ten (6-10)	0.9999	six to ten (6-10)	0.8614 (0.4962-0.9997)	*		Commelinidae	six to ten (6-10)	six to ten (6-10)	0.9999	six to ten (6-10)	0.9348 (0.6533-0.9999)	**		Commelinidae	six to ten (6-10)	six to ten (6-10)	0.9999	six to ten (6-10)	0.9579 (0.7571-1.0000)	**		Commelinidae	six to ten (6-10)	six to ten (6-10)	0.9999	six to ten (6-10)	0.9735 (0.8855-0.9999)	**		Commelinidae
201_C. Number of perianth parts (binary) (D2c)	Commelinidae	one to six (1-6)	one to six (1-6)	1	one to six (1-6)	0.999 (0.9976-1.0000)	***		Commelinidae	one to six (1-6)	one to six (1-6)	1	one to six (1-6)	0.9989 (0.9977-0.9998)	***		Commelinidae	one to six (1-6)	one to six (1-6)	1	one to six (1-6)	0.9991 (0.9979-0.9999)	***		Commelinidae	one to six (1-6)	one to six (1-6)	1	one to six (1-6)	0.9986 (0.9970-0.9998)	***		Commelinidae	one to six (1-6)	one to six (1-6)	1	one to six (1-6)	0.9991 (0.998-1.000)	***		Commelinidae	one to six (1-6)	one to six (1-6)	1	one to six (1-6)	0.999 (0.9975-0.9999)	***		Commelinidae
230_A. Perianth phyllotaxy (binary) (D2d)	Commelinidae	whorled	whorled	0.9998	whorled	0.9947 (0.966-1.000)	***		Commelinidae	whorled	whorled	0.9822	whorled	0.9914 (0.9547-1.0000)	***		Commelinidae	whorled	whorled	0.9998	whorled	0.9953 (0.9677-1.0000)	***		Commelinidae	whorled	whorled	0.9996	whorled	0.9918 (0.9523-1.0000)	***		Commelinidae	whorled	whorled	0.9997	whorled	0.9931 (0.9616-1.0000)	***		Commelinidae	whorled	whorled	0.9999	whorled	0.9965 (0.9748-1.0000)	***		Commelinidae
231_A. Number of perianth whorls (D2c)	Commelinidae	two (2)	two (2)	1	two (2)	0.998 (0.9929-1.0000)	***		Commelinidae	two (2)	two (2)	1	two (2)	0.9977 (0.9924-1.0000)	***		Commelinidae	two (2)	two (2)	1	two (2)	0.9977 (0.9927-0.9999)	***		Commelinidae	two (2)	two (2)	1	two (2)	0.9966 (0.9895-0.9999)	***		Commelinidae	two (2)	two (2)	1	two (2)	0.9962 (0.9891-1.0000)	***		Commelinidae	two (2)	two (2)	1	two (2)	0.9971 (0.9892-1.0000)	***		Commelinidae
232_A. Perianth merism (4-state) (D2c)	Commelinidae	trimerous	trimerous	1	trimerous	0.9987 (0.9965-1.0000)	***		Commelinidae	trimerous	trimerous	1	trimerous	0.9982 (0.9953-0.9999)	***		Commelinidae	trimerous	trimerous	1	trimerous	0.9986 (0.9964-0.9999)	***		Commelinidae	trimerous	trimerous	1	trimerous	0.9981 (0.9954-0.9998)	***		Commelinidae	trimerous	trimerous	1	trimerous	0.9988 (0.9970-0.9999)	***		Commelinidae	trimerous	trimerous	1	trimerous	0.9984 (0.9959-0.9999)	***		Commelinidae
232_B. Perianth merism (3-state) (D2c)	Commelinidae	trimerous	trimerous	1	trimerous	0.9992 (0.9981-1.0000)	***		Commelinidae	trimerous	trimerous	1	trimerous	0.9989 (0.9974-0.9998)	***		Commelinidae	trimerous	trimerous	1	trimerous	0.9992 (0.9981-1.0000)	***		Commelinidae	trimerous	trimerous	1	trimerous	0.999 (0.9979-0.9999)	***		Commelinidae	trimerous	trimerous	1	trimerous	0.9992 (0.9983-0.9999)	***		Commelinidae	trimerous	trimerous	1	trimerous	0.9992 (0.9981-0.9999)	***		Commelinidae
234_A. Perianth differentiation (binary) (D2d)	Commelinidae	undifferentiated	undifferentiated	1	undifferentiated	0.9621 (0.8523-1.0000)	**		Commelinidae	undifferentiated	undifferentiated	0.9999	undifferentiated	0.9767 (0.8813-1.0000)	**		Commelinidae	undifferentiated	undifferentiated	1	undifferentiated	0.9737 (0.869-1.000)	**		Commelinidae	undifferentiated	undifferentiated	1	undifferentiated	0.9706 (0.8622-0.9999)	**		Commelinidae	undifferentiated	undifferentiated	0.9999	undifferentiated	0.9716 (0.8883-1.0000)	**		Commelinidae	undifferentiated	undifferentiated	0.9999	undifferentiated	0.938 (0.824-1.000)	**		Commelinidae
204_A. Fusion of perianth (D2c)	Commelinidae	free (<5%)	free (<5%)	0.9971	free (<5%)	0.9094 (0.8633-0.9527)	**		Commelinidae	free (<5%)	free (<5%)	0.999	free (<5%)	0.8985 (0.8510-0.9436)	**		Commelinidae	free (<5%)	free (<5%)	0.9989	free (<5%)	0.9109 (0.8659-0.9516)	**		Commelinidae	free (<5%)	free (<5%)	0.9989	free (<5%)	0.9073 (0.8662-0.9450)	**		Commelinidae	free (<5%)	free (<5%)	0.9991	free (<5%)	0.9112 (0.8688-0.9507)	**		Commelinidae	free (<5%)	free (<5%)	0.9968	free (<5%)	0.8988 (0.8500-0.9446)	**		Commelinidae
207_A. Symmetry of perianth (binary) (D2d)	Commelinidae	actinomorphic	actinomorphic	0.9959	actinomorphic	0.702 (0.3060-0.9993)	*		Commelinidae	actinomorphic	actinomorphic	0.9974	actinomorphic	0.7942 (0.3830-0.9984)	*		Commelinidae	actinomorphic	actinomorphic	0.9953	actinomorphic	0.7976 (0.3366-0.9963)	*		Commelinidae	actinomorphic	actinomorphic	0.9967	actinomorphic	0.8026 (0.4246-0.9968)	*		Commelinidae	actinomorphic	actinomorphic	0.9976	actinomorphic	0.8636 (0.4803-0.9969)	*		Commelinidae	actinomorphic	actinomorphic	0.9961	actinomorphic	0.7135 (0.3229-0.9997)	*		Commelinidae
301_B. Number of fertile stamens (3-state) (D2c)	Commelinidae	six to ten (6-10)	six to ten (6-10)	0.9998	six to ten (6-10)	0.9634 (0.7005-0.9996)	**		Commelinidae	six to ten (6-10)	six to ten (6-10)	0.9997	six to ten (6-10)	0.8828 (0.3658-0.9986)	*		Commelinidae	six to ten (6-10)	six to ten (6-10)	0.9998	six to ten (6-10)	0.9556 (0.53-1.00)	**		Commelinidae	six to ten (6-10)	six to ten (6-10)	0.9996	six to ten (6-10)	0.9173 (0.3082-0.9990)	*		Commelinidae	six to ten (6-10)	six to ten (6-10)	0.9998	six to ten (6-10)	0.9709 (0.9604-1.0000)	***		Commelinidae	six to ten (6-10)	six to ten (6-10)	0.9998	six to ten (6-10)	0.9893 (0.9816-0.9996)	***		Commelinidae
301_C. Number of fertile stamens (binary) (D2c)	Commelinidae	one to six (1-6)	one to six (1-6)	1	one to six (1-6)	0.995 (0.9897-0.9991)	***		Commelinidae	one to six (1-6)	one to six (1-6)	1	one to six (1-6)	0.9888 (0.9768-0.9972)	***		Commelinidae	one to six (1-6)	one to six (1-6)	1	one to six (1-6)	0.9872 (0.9720-0.9985)	***		Commelinidae	one to six (1-6)	one to six (1-6)	1	one to six (1-6)	0.988 (0.9744-0.9982)	***		Commelinidae	one to six (1-6)	one to six (1-6)	1	one to six (1-6)	0.9906 (0.9790-0.9991)	***		Commelinidae	one to six (1-6)	one to six (1-6)	1	one to six (1-6)	0.9967 (0.9927-0.9994)	***		Commelinidae
330_A. Androecium structural phyllotaxy (binary) (D2d)	Commelinidae	whorled	whorled	1	whorled	0.9978 (0.9901-1.0000)	***		Commelinidae	whorled	whorled	0.9997	whorled	0.9983 (0.9968-1.0000)	***		Commelinidae	whorled	whorled	1	whorled	0.9984 (0.9941-1.0000)	***		Commelinidae	whorled	whorled	1	whorled	0.9977 (0.986-1.000)	***		Commelinidae	whorled	whorled	0.9997	whorled	0.9978 (0.9835-1.0000)	***		Commelinidae	whorled	whorled	0.9999	whorled	0.9988 (0.998-1.000)	***		Commelinidae
331_A. Number of androecium structural whorls (3-state) (D2c)	Commelinidae	two (2)	two (2)	0.9492	two (2)	0.9808 (0.9546-1.0000)	***		Commelinidae	two (2)	two (2)	0.8976	two (2)	0.9825 (0.9505-1.0000)	***		Commelinidae	two (2)	two (2)	1	two (2)	0.9839 (0.9603-1.0000)	***		Commelinidae	two (2)	two (2)	0.9087	two (2)	0.9798 (0.9482-1.0000)	**		Commelinidae	two (2)	two (2)	1	two (2)	0.9828 (0.9584-1.0000)	***		Commelinidae	two (2)	two (2)	0.968	two (2)	0.8439 (0.5529-1.0000)	**		Commelinidae
332_A. Androecium structural merism (4-state) (D2c)	Commelinidae	trimerous	trimerous	1	trimerous	0.9492 (0.8336-1.0000)	**		Commelinidae	trimerous	trimerous	1	trimerous	0.9342 (0.8188-1.0000)	**		Commelinidae	trimerous	trimerous	0.8489	trimerous	0.9653 (0.8499-1.0000)	**		Commelinidae	trimerous	trimerous	0.5071	trimerous	0.9263 (0.8028-1.0000)	**		Commelinidae	trimerous	trimerous	0.8452	trimerous	0.9504 (0.8309-1.0000)	**		Commelinidae	trimerous	trimerous	1	trimerous	0.9316 (0.8136-1.0000)	**		Commelinidae
332_B. Androecium structural merism (3-state) (D2c)	Commelinidae	trimerous	trimerous	1	trimerous	0.9966 (0.9868-1.0000)	***		Commelinidae	trimerous	trimerous	1	trimerous	0.9976 (0.9956-0.9995)	***		Commelinidae	trimerous	trimerous	1	trimerous	0.9986 (0.9961-1.0000)	***		Commelinidae	trimerous	trimerous	1	trimerous	0.9975 (0.9951-0.9996)	***		Commelinidae	trimerous	trimerous	1	trimerous	0.9981 (0.9964-0.9995)	***		Commelinidae	trimerous	trimerous	1	trimerous	0.9834 (0.9709-0.9978)	***		Commelinidae
305_A. Filament (binary) (D2d)	Commelinidae	typical (narrow)	typical (narrow)	0.6933	typical (narrow)	0.8479 (0.3479-0.9729)	*		Commelinidae	laminar (wide) / typical (narrow)	laminar (wide)	0.6586	typical (narrow)	0.709 (0.2191-0.8947)	*		Commelinidae	typical (narrow)	typical (narrow)	0.6606	typical (narrow)	0.6981 (0.2096-0.9164)	*		Commelinidae	typical (narrow)	laminar (wide)	0.684	typical (narrow)	0.7029 (0.2218-0.8810)	*		Commelinidae	laminar (wide) / typical (narrow)	laminar (wide)	0.6355	typical (narrow)	0.7318 (0.2348-0.9141)	*		Commelinidae	typical (narrow)	typical (narrow)	0.9014	typical (narrow)	0.8655 (0.4191-0.9689)	*		Commelinidae
311_A. Anther orientation (D2d)	Commelinidae	introrse	introrse	0.9926	introrse	0.8687 (0.7273-1.0000)	**		Commelinidae	introrse	introrse	0.9959	introrse	0.8763 (0.7371-1.0000)	**		Commelinidae	introrse	introrse	0.9954	introrse	0.8714 (0.7347-1.0000)	**		Commelinidae	introrse	introrse	0.995	introrse	0.8673 (0.7311-1.0000)	**		Commelinidae	introrse	introrse	0.9946	introrse	0.8617 (0.7225-1.0000)	**		Commelinidae	introrse	introrse	0.9939	introrse	0.8636 (0.7295-0.9994)	**		Commelinidae
312_A. Anther attachment (binary) (D2d)	Commelinidae	basifixed	basifixed	0.9823	basifixed	0.9697 (0.9409-0.9909)	**		Commelinidae	basifixed	basifixed	0.9764	basifixed	0.9427 (0.9014-0.9770)	**		Commelinidae	basifixed	basifixed	0.9823	basifixed	0.9518 (0.9173-0.9830)	**		Commelinidae	basifixed	basifixed	0.9837	basifixed	0.9372 (0.8964-0.9733)	**		Commelinidae	basifixed	basifixed	0.9857	basifixed	0.9532 (0.9222-0.9840)	**		Commelinidae	basifixed	basifixed	0.9554	basifixed	0.9571 (0.9174-0.9909)	**		Commelinidae
313_A. Anther dehiscence (3-state) (D2d)	Commelinidae	longitudinal slit	longitudinal slit	1	longitudinal slit	0.9884 (0.9192-1.0000)	**		Commelinidae	longitudinal slit	longitudinal slit	1	longitudinal slit	0.9827 (0.8866-1.0000)	**		Commelinidae	longitudinal slit	longitudinal slit	1	longitudinal slit	0.9779 (0.8843-1.0000)	**		Commelinidae	longitudinal slit	longitudinal slit	1	longitudinal slit	0.9599 (0.8511-1.0000)	**		Commelinidae	longitudinal slit	longitudinal slit	1	longitudinal slit	0.9891 (0.9131-1.0000)	**		Commelinidae	longitudinal slit	longitudinal slit	1	longitudinal slit	0.9888 (0.9249-1.0000)	**		Commelinidae
401_B. Number of structural carpels (5-state) (D2c)	Commelinidae	three (3)	three (3)	1	three (3)	0.9923 (0.9798-0.9997)	***		Commelinidae	three (3)	three (3)	0.9999	three (3)	0.9878 (0.9741-0.9988)	***		Commelinidae	three (3)	three (3)	1	three (3)	0.9898 (0.9767-0.9995)	***		Commelinidae	three (3)	three (3)	1	three (3)	0.9862 (0.9674-0.9990)	***		Commelinidae	three (3)	three (3)	0.9999	three (3)	0.9905 (0.9775-0.9994)	***		Commelinidae	three (3)	three (3)	0.9999	three (3)	0.9886 (0.9676-0.9998)	***		Commelinidae
400_A. Gynoecium phyllotaxy (D2d)	Commelinidae	whorled	whorled	0.9997	whorled	0.9688 (0.9178-1.0000)	**		Commelinidae	whorled	whorled	0.9997	whorled	0.9629 (0.9057-1.0000)	**		Commelinidae	whorled	whorled	0.9998	whorled	0.9665 (0.9146-1.0000)	**		Commelinidae	whorled	whorled	0.9996	whorled	0.9617 (0.9026-1.0000)	**		Commelinidae	whorled	whorled	0.9997	whorled	0.966 (0.9134-1.0000)	**		Commelinidae	whorled	whorled	1	whorled	0.9778 (0.9369-1.0000)	**		Commelinidae
403_A. Fusion of ovaries (binary) (D2c)	Commelinidae	fused (>5%)	fused (>5%)	1	fused (>5%)	0.9961 (0.9872-1.0000)	***		Commelinidae	fused (>5%)	fused (>5%)	0.9999	fused (>5%)	0.9951 (0.9826-1.0000)	***		Commelinidae	fused (>5%)	fused (>5%)	1	fused (>5%)	0.9948 (0.9837-1.0000)	***		Commelinidae	fused (>5%)	fused (>5%)	0.9999	fused (>5%)	0.994 (0.9797-1.0000)	***		Commelinidae	fused (>5%)	fused (>5%)	0.9999	fused (>5%)	0.9946 (0.9825-1.0000)	***		Commelinidae	fused (>5%)	fused (>5%)	1	fused (>5%)	0.9988 (0.9933-1.0000)	***		Commelinidae
411_A. Number of ovules per functional carpel (3-state) (D2c)	Commelinidae	one (1)	three or more (>2)	0.7521	three or more (>2)	0.8989 (0.1737-1.0000)	*		Commelinidae	one (1)	three or more (>2)	0.9041	three or more (>2)	0.76 (0.1558-1.0000)	*		Commelinidae	one (1)	three or more (>2)	0.8901	three or more (>2)	0.7662 (0.1685-1.0000)	*		Commelinidae	one (1)	three or more (>2)	0.9218	three or more (>2)	0.5539 (0.1315-1.0000)	*		Commelinidae	one (1)	three or more (>2)	0.8553	three or more (>2)	0.6237 (0.1718-1.0000)	*		Commelinidae	one (1)	three or more (>2)	0.7501	three or more (>2)	0.8865 (0.1695-1.0000)	*		Commelinidae
100_A. Functional sex of flowers (D2d)	Pentapetalae	bisexual	bisexual	1	bisexual	1 (1-1)	***		Pentapetalae	bisexual	bisexual	1	bisexual	1 (1-1)	***		Pentapetalae	bisexual	bisexual	1	bisexual	1 (0.9997-1.0000)	***		Pentapetalae	bisexual	bisexual	1	bisexual	1 (0.9997-1.0000)	***		Pentapetalae	bisexual	bisexual	1	bisexual	1 (1-1)	***		Pentapetalae	bisexual	bisexual	1	bisexual	1 (0.9999-1.0000)	***		Pentapetalae
100_B. Structural sex of flowers (D2d)	Pentapetalae	bisexual	bisexual	1	bisexual	1 (1-1)	***		Pentapetalae	bisexual	bisexual	1	bisexual	1 (0.9998-1.0000)	***		Pentapetalae	bisexual	bisexual	1	bisexual	1 (0.9999-1.0000)	***		Pentapetalae	bisexual	bisexual	1	bisexual	1 (0.9998-1.0000)	***		Pentapetalae	bisexual	bisexual	1	bisexual	1 (0.9998-1.0000)	***		Pentapetalae	bisexual	bisexual	1	bisexual	1 (1-1)	***		Pentapetalae
102_B. Ovary position (binary) (D2d)	Pentapetalae	superior	superior	0.9999	superior	0.9996 (0.9992-0.9999)	***		Pentapetalae	superior	superior	0.9998	superior	0.999 (0.9972-0.9999)	***		Pentapetalae	superior	superior	0.9995	superior	0.9995 (0.9985-1.0000)	***		Pentapetalae	superior	superior	0.9997	superior	0.9991 (0.9975-1.0000)	***		Pentapetalae	superior	superior	1	superior	0.9993 (0.9985-1.0000)	***		Pentapetalae	superior	superior	0.9996	superior	0.9989 (0.9978-0.9999)	***		Pentapetalae
201_A. Perianth presence (D2c)	Pentapetalae	present	present	1	present	1 (1-1)	***		Pentapetalae	present	present	1	present	1 (1-1)	***		Pentapetalae	present	present	1	present	1 (1-1)	***		Pentapetalae	present	present	1	present	1 (1-1)	***		Pentapetalae	present	present	1	present	1 (1-1)	***		Pentapetalae	present	present	1	present	1 (1-1)	***		Pentapetalae
201_B. Number of perianth parts (3-state) (D2c)	Pentapetalae	six to ten (6-10)	six to ten (6-10)	0.9959	six to ten (6-10)	0.9411 (0.3904-1.0000)	*		Pentapetalae	six to ten (6-10)	six to ten (6-10)	0.9958	six to ten (6-10)	0.97 (0.9582-1.0000)	***		Pentapetalae	six to ten (6-10)	six to ten (6-10)	0.9952	six to ten (6-10)	0.8628 (0.5002-1.0000)	**		Pentapetalae	six to ten (6-10)	six to ten (6-10)	0.9963	six to ten (6-10)	0.8611 (0.0236-1.0000)	*		Pentapetalae	six to ten (6-10)	six to ten (6-10)	0.9946	six to ten (6-10)	0.9262 (0.1337-1.0000)	*		Pentapetalae	six to ten (6-10)	six to ten (6-10)	0.9931	six to ten (6-10)	0.9661 (0.8638-1.0000)	**		Pentapetalae
201_C. Number of perianth parts (binary) (D2c)	Pentapetalae	more than six (>6)	more than six (>6)	1	more than six (>6)	1 (1-1)	***		Pentapetalae	more than six (>6)	more than six (>6)	1	more than six (>6)	1 (1-1)	***		Pentapetalae	more than six (>6)	more than six (>6)	1	more than six (>6)	1 (1-1)	***		Pentapetalae	more than six (>6)	more than six (>6)	1	more than six (>6)	1 (1-1)	***		Pentapetalae	more than six (>6)	more than six (>6)	1	more than six (>6)	1 (0.9998-1.0000)	***		Pentapetalae	more than six (>6)	more than six (>6)	1	more than six (>6)	1 (1-1)	***		Pentapetalae
230_A. Perianth phyllotaxy (binary) (D2d)	Pentapetalae	whorled	whorled	0.9889	whorled	0.9993 (0.9972-1.0000)	***		Pentapetalae	whorled	spiral	1	whorled	0.9982 (0.9918-1.0000)	*		Pentapetalae	whorled	whorled	0.9804	whorled	0.9989 (0.9946-1.0000)	***		Pentapetalae	whorled	whorled	0.9769	whorled	0.9985 (0.9929-1.0000)	***		Pentapetalae	whorled	whorled	0.9777	whorled	0.9982 (0.9912-1.0000)	***		Pentapetalae	whorled	whorled	0.9876	whorled	0.9995 (0.9972-1.0000)	***		Pentapetalae
231_A. Number of perianth whorls (D2c)	Pentapetalae	two (2)	two (2)	0.9998	two (2)	0.9998 (0.9991-1.0000)	***		Pentapetalae	two (2)	two (2)	0.9998	two (2)	0.9996 (0.9987-1.0000)	***		Pentapetalae	two (2)	two (2)	0.9998	two (2)	0.9997 (0.9988-1.0000)	***		Pentapetalae	two (2)	two (2)	0.9998	two (2)	0.9994 (0.9978-1.0000)	***		Pentapetalae	two (2)	two (2)	0.9998	two (2)	0.9991 (0.9977-1.0000)	***		Pentapetalae	two (2)	two (2)	0.9996	two (2)	0.9994 (0.9978-1.0000)	***		Pentapetalae
232_A. Perianth merism (4-state) (D2c)	Pentapetalae	pentamerous	pentamerous	0.9997	pentamerous	1 (0.9999-1.0000)	***		Pentapetalae	pentamerous	pentamerous	0.9997	pentamerous	0.9999 (0.9992-1.0000)	***		Pentapetalae	pentamerous	pentamerous	0.9997	pentamerous	0.9999 (0.9997-1.0000)	***		Pentapetalae	pentamerous	pentamerous	0.9997	pentamerous	0.9999 (0.9997-1.0000)	***		Pentapetalae	pentamerous	pentamerous	0.9998	pentamerous	0.9998 (0.9988-1.0000)	***		Pentapetalae	pentamerous	pentamerous	0.9993	pentamerous	0.9999 (0.9998-1.0000)	***		Pentapetalae
232_B. Perianth merism (3-state) (D2c)	Pentapetalae	pentamerous	pentamerous	0.9998	pentamerous	1 (1-1)	***		Pentapetalae	pentamerous	pentamerous	0.9998	pentamerous	0.9999 (0.9996-1.0000)	***		Pentapetalae	pentamerous	pentamerous	0.9998	pentamerous	1 (0.9998-1.0000)	***		Pentapetalae	pentamerous	pentamerous	0.9998	pentamerous	0.9999 (0.9997-1.0000)	***		Pentapetalae	pentamerous	pentamerous	0.9998	pentamerous	0.9999 (0.9996-1.0000)	***		Pentapetalae	pentamerous	pentamerous	0.9996	pentamerous	1 (0.9999-1.0000)	***		Pentapetalae
234_A. Perianth differentiation (binary) (D2d)	Pentapetalae	differentiated	differentiated	0.9645	differentiated	0.9925 (0.9901-1.0000)	***		Pentapetalae	differentiated	differentiated	0.9471	differentiated	0.8647 (0-1)	*		Pentapetalae	differentiated	differentiated	0.9479	differentiated	0.9719 (0.932-1.000)	**		Pentapetalae	differentiated	differentiated	0.9564	differentiated	0.9792 (0.9663-1.0000)	***		Pentapetalae	differentiated	differentiated	0.9429	differentiated	0.9787 (0.9625-1.0000)	***		Pentapetalae	differentiated	differentiated	0.9522	differentiated	0.9956 (0.9875-1.0000)	***		Pentapetalae
204_A. Fusion of perianth (D2c)	Pentapetalae	free (<5%)	free (<5%)	0.9971	free (<5%)	0.884 (0.7955-0.9568)	**		Pentapetalae	free (<5%)	free (<5%)	0.9993	free (<5%)	0.8745 (0.7854-0.9446)	**		Pentapetalae	free (<5%) / fused (>5%)	free (<5%)	0.9995	free (<5%)	0.8925 (0.8105-0.9555)	*		Pentapetalae	free (<5%)	free (<5%)	0.9993	free (<5%)	0.8753 (0.7916-0.9425)	**		Pentapetalae	free (<5%)	free (<5%)	0.9994	free (<5%)	0.8494 (0.6923-0.9446)	**		Pentapetalae	free (<5%)	free (<5%)	0.9943	free (<5%)	0.8432 (0.7294-0.9372)	**		Pentapetalae
207_A. Symmetry of perianth (binary) (D2d)	Pentapetalae	actinomorphic	actinomorphic	1	actinomorphic	0.9988 (0.9994-1.0000)	***		Pentapetalae	actinomorphic	actinomorphic	1	actinomorphic	0.9985 (0.9982-1.0000)	***		Pentapetalae	actinomorphic	actinomorphic	1	actinomorphic	0.9997 (0.9987-1.0000)	***		Pentapetalae	actinomorphic	actinomorphic	1	actinomorphic	0.9989 (0.9995-1.0000)	***		Pentapetalae	actinomorphic	actinomorphic	1	actinomorphic	0.9997 (0.9984-1.0000)	***		Pentapetalae	actinomorphic	actinomorphic	1	actinomorphic	0.9987 (0.9978-1.0000)	***		Pentapetalae
301_B. Number of fertile stamens (3-state) (D2c)	Pentapetalae	six to ten (6-10)	more than ten (>10)	1	more than ten (>10)	0.9246 (0.0011-1.0000)	*		Pentapetalae	six to ten (6-10)	more than ten (>10)	1	more than ten (>10)	0.7644 (0.0005-1.0000)	*		Pentapetalae	six to ten (6-10)	more than ten (>10)	1	more than ten (>10)	0.8154 (0.0005-1.0000)	*		Pentapetalae	six to ten (6-10)	more than ten (>10)	1	more than ten (>10)	0.7749 (0.0005-1.0000)	*		Pentapetalae	six to ten (6-10)	more than ten (>10)	1	more than ten (>10)	0.531 (0.0006-1.0000)	*		Pentapetalae	six to ten (6-10)	more than ten (>10)	1	more than ten (>10)	0.8058 (0.0008-1.0000)	*		Pentapetalae
301_C. Number of fertile stamens (binary) (D2c)	Pentapetalae	more than six (>6)	more than six (>6)	1	more than six (>6)	1 (1-1)	***		Pentapetalae	more than six (>6)	more than six (>6)	1	more than six (>6)	1 (1-1)	***		Pentapetalae	more than six (>6)	more than six (>6)	1	more than six (>6)	1 (1-1)	***		Pentapetalae	more than six (>6)	more than six (>6)	1	more than six (>6)	1 (1-1)	***		Pentapetalae	more than six (>6)	more than six (>6)	1	more than six (>6)	1 (1-1)	***		Pentapetalae	more than six (>6)	more than six (>6)	1	more than six (>6)	1 (1-1)	***		Pentapetalae
330_A. Androecium structural phyllotaxy (binary) (D2d)	Pentapetalae	whorled	whorled	1	whorled	1 (0.9999-1.0000)	***		Pentapetalae	whorled	whorled	0.9979	whorled	0.9999 (1-1)	***		Pentapetalae	whorled	whorled	1	whorled	0.9999 (0.9999-1.0000)	***		Pentapetalae	whorled	whorled	1	whorled	0.9999 (0.9999-1.0000)	***		Pentapetalae	whorled	whorled	0.9975	whorled	0.9999 (0.9998-1.0000)	***		Pentapetalae	whorled	whorled	0.9983	whorled	1 (1-1)	***		Pentapetalae
331_A. Number of androecium structural whorls (3-state) (D2c)	Pentapetalae	one (1)	two (2)	0.9934	two (2)	0.9981 (0.9995-1.0000)	**		Pentapetalae	one (1)	two (2)	0.9928	two (2)	0.9982 (0.9975-1.0000)	**		Pentapetalae	one (1)	two (2)	1	two (2)	0.9994 (0.9961-1.0000)	**		Pentapetalae	one (1)	two (2)	0.9958	two (2)	0.9995 (0.9974-1.0000)	**		Pentapetalae	one (1)	two (2)	1	two (2)	0.9986 (0.9925-1.0000)	**		Pentapetalae	one (1)	two (2)	0.9915	two (2)	0.8628 (0.5513-1.0000)	*		Pentapetalae
332_A. Androecium structural merism (4-state) (D2c)	Pentapetalae	pentamerous	pentamerous	1	tetramerous	0.8621 (0-1)	*		Pentapetalae	pentamerous	pentamerous	1	tetramerous	0.8206 (0-1)	*		Pentapetalae	pentamerous	pentamerous	0.9977	tetramerous	0.5369 (0-1)	*		Pentapetalae	pentamerous	tetramerous	0.8355	tetramerous	0.8708 (0-1)	*		Pentapetalae	pentamerous	pentamerous	0.9708	tetramerous	0.6892 (0-1)	*		Pentapetalae	pentamerous	pentamerous	0.9999	tetramerous	0.9962 (0.997-1.000)	*		Pentapetalae
332_B. Androecium structural merism (3-state) (D2c)	Pentapetalae	pentamerous	tetramerous	0.9999	tetramerous	0.5975 (0-1)	*		Pentapetalae	pentamerous	pentamerous	0.9999	pentamerous	1 (1-1)	***		Pentapetalae	pentamerous	pentamerous	0.9999	pentamerous	0.5589 (0-1)	*		Pentapetalae	pentamerous	tetramerous	1	pentamerous	1 (0.9999-1.0000)	*		Pentapetalae	pentamerous	pentamerous	0.9999	pentamerous	1 (1-1)	***		Pentapetalae	pentamerous	tetramerous	0.9999	pentamerous	1 (0.9999-1.0000)	*		Pentapetalae
305_A. Filament (binary) (D2d)	Pentapetalae	typical (narrow)	typical (narrow)	0.9996	typical (narrow)	0.9989 (0.9992-1.0000)	***		Pentapetalae	typical (narrow)	typical (narrow)	0.9989	typical (narrow)	0.9973 (0.998-1.000)	***		Pentapetalae	typical (narrow)	typical (narrow)	0.9996	typical (narrow)	0.9974 (0.997-1.000)	***		Pentapetalae	typical (narrow)	typical (narrow)	0.999	typical (narrow)	0.9977 (0.9978-1.0000)	***		Pentapetalae	typical (narrow)	typical (narrow)	0.9981	typical (narrow)	0.9954 (0.9972-1.0000)	***		Pentapetalae	typical (narrow)	typical (narrow)	0.9999	typical (narrow)	0.9997 (0.9992-1.0000)	***		Pentapetalae
311_A. Anther orientation (D2d)	Pentapetalae	introrse	introrse	1	introrse	0.9999 (0.9998-1.0000)	***		Pentapetalae	introrse	introrse	1	introrse	0.9995 (0.997-1.000)	***		Pentapetalae	introrse	introrse	1	introrse	0.999 (0.9936-1.0000)	***		Pentapetalae	introrse	introrse	1	introrse	0.9996 (0.9997-1.0000)	***		Pentapetalae	introrse	introrse	1	introrse	0.9984 (0.9903-1.0000)	***		Pentapetalae	introrse	introrse	1	introrse	0.9998 (0.9994-1.0000)	***		Pentapetalae
312_A. Anther attachment (binary) (D2d)	Pentapetalae	basifixed	dorsifixed	0.9139	dorsifixed	0.6479 (0.4516-0.8114)	*		Pentapetalae	basifixed	dorsifixed	0.8981	dorsifixed	0.5971 (0.3885-0.7642)	*		Pentapetalae	basifixed	dorsifixed	0.892	dorsifixed	0.5807 (0.3845-0.7628)	*		Pentapetalae	basifixed	dorsifixed	0.8862	dorsifixed	0.564 (0.3658-0.7419)	*		Pentapetalae	basifixed	dorsifixed	0.7638	dorsifixed	0.5708 (0.3825-0.7506)	*		Pentapetalae	basifixed	dorsifixed	0.9515	dorsifixed	0.6014 (0.3936-0.7729)	*		Pentapetalae
313_A. Anther dehiscence (3-state) (D2d)	Pentapetalae	longitudinal slit	longitudinal slit	1	longitudinal slit	0.8302 (0-1)	*		Pentapetalae	longitudinal slit	longitudinal slit	1	longitudinal slit	0.8141 (0-1)	*		Pentapetalae	longitudinal slit	longitudinal slit	1	longitudinal slit	0.7303 (0-1)	*		Pentapetalae	longitudinal slit	longitudinal slit	1	longitudinal slit	0.5733 (0-1)	*		Pentapetalae	longitudinal slit	longitudinal slit	1	longitudinal slit	0.8698 (0-1)	*		Pentapetalae	longitudinal slit	longitudinal slit	1	longitudinal slit	0.8322 (0-1)	*		Pentapetalae
401_B. Number of structural carpels (5-state) (D2c)	Pentapetalae	three (3) / four or five (4-5)	three (3)	0.9997	four or five (4-5)	0.9993 (0.9984-1.0000)	*		Pentapetalae	three (3) / four or five (4-5)	four or five (4-5)	0.9998	four or five (4-5)	0.9987 (0.9951-1.0000)	**		Pentapetalae	four or five (4-5)	three (3)	0.9997	four or five (4-5)	0.9987 (0.9965-1.0000)	*		Pentapetalae	three (3)	four or five (4-5)	0.9999	four or five (4-5)	0.9926 (0.9963-1.0000)	**		Pentapetalae	three (3) / four or five (4-5)	four or five (4-5)	0.9999	four or five (4-5)	0.9993 (0.9973-1.0000)	**		Pentapetalae	three (3) / four or five (4-5)	four or five (4-5)	0.9997	four or five (4-5)	0.9902 (0.9914-1.0000)	**		Pentapetalae
400_A. Gynoecium phyllotaxy (D2d)	Pentapetalae	whorled	whorled	0.9741	whorled	0.9971 (0.9913-1.0000)	***		Pentapetalae	whorled	whorled	0.9777	whorled	0.9971 (0.9905-1.0000)	***		Pentapetalae	whorled	whorled	0.9763	whorled	0.9972 (0.9906-1.0000)	***		Pentapetalae	whorled	whorled	0.9808	whorled	0.9973 (0.9912-1.0000)	***		Pentapetalae	whorled	whorled	0.9746	whorled	0.9959 (0.987-1.000)	***		Pentapetalae	whorled	whorled	0.9638	whorled	0.9948 (0.9823-1.0000)	***		Pentapetalae
403_A. Fusion of ovaries (binary) (D2c)	Pentapetalae	fused (>5%)	fused (>5%)	0.9961	fused (>5%)	0.9876 (0.9951-1.0000)	***		Pentapetalae	fused (>5%)	fused (>5%)	0.9976	fused (>5%)	0.9865 (0.9579-1.0000)	***		Pentapetalae	fused (>5%)	fused (>5%)	0.9951	fused (>5%)	0.9872 (0.9494-1.0000)	**		Pentapetalae	fused (>5%)	fused (>5%)	0.9998	fused (>5%)	0.9911 (0.9628-1.0000)	***		Pentapetalae	fused (>5%)	fused (>5%)	0.9944	fused (>5%)	0.9816 (0.9318-1.0000)	**		Pentapetalae	fused (>5%)	fused (>5%)	0.9955	fused (>5%)	0.9987 (0.997-1.000)	***		Pentapetalae
411_A. Number of ovules per functional carpel (3-state) (D2c)	Pentapetalae	three or more (>2)	three or more (>2)	1	three or more (>2)	0.9978 (0.9991-1.0000)	***		Pentapetalae	three or more (>2)	three or more (>2)	1	three or more (>2)	0.992 (0.9944-1.0000)	***		Pentapetalae	three or more (>2)	three or more (>2)	1	three or more (>2)	0.9992 (0.998-1.000)	***		Pentapetalae	one (1) / two (2)	three or more (>2)	1	three or more (>2)	0.9969 (0.9983-1.0000)	**		Pentapetalae	three or more (>2)	three or more (>2)	1	three or more (>2)	0.9991 (0.9985-1.0000)	***		Pentapetalae	three or more (>2)	three or more (>2)	1	three or more (>2)	0.9927 (0.9934-1.0000)	***		Pentapetalae
100_A. Functional sex of flowers (D2d)	Superasteridae	bisexual	bisexual	1	bisexual	0.9998 (0.9987-1.0000)	***		Superasteridae	bisexual	bisexual	1	bisexual	0.9999 (0.9992-1.0000)	***		Superasteridae	bisexual	bisexual	1	bisexual	0.9996 (0.9983-1.0000)	***		Superasteridae	bisexual	bisexual	1	bisexual	0.9996 (0.9986-1.0000)	***		Superasteridae	bisexual	bisexual	1	bisexual	0.9999 (0.999-1.000)	***		Superasteridae	bisexual	bisexual	1	bisexual	0.9997 (0.9981-1.0000)	***		Superasteridae
100_B. Structural sex of flowers (D2d)	Superasteridae	bisexual	bisexual	1	bisexual	0.9997 (0.9994-1.0000)	***		Superasteridae	bisexual	bisexual	1	bisexual	0.9998 (0.9996-1.0000)	***		Superasteridae	bisexual	bisexual	1	bisexual	0.9998 (0.9994-1.0000)	***		Superasteridae	bisexual	bisexual	1	bisexual	0.9999 (0.9996-1.0000)	***		Superasteridae	bisexual	bisexual	1	bisexual	0.9998 (0.9995-1.0000)	***		Superasteridae	bisexual	bisexual	1	bisexual	0.9996 (0.9991-1.0000)	***		Superasteridae
102_B. Ovary position (binary) (D2d)	Superasteridae	superior	superior	1	superior	0.9994 (0.9986-0.9999)	***		Superasteridae	superior	superior	1	superior	0.9995 (0.9989-0.9999)	***		Superasteridae	superior	superior	0.9998	superior	0.9994 (0.9986-1.0000)	***		Superasteridae	superior	superior	0.9999	superior	0.9996 (0.9989-0.9999)	***		Superasteridae	superior	superior	1	superior	0.9993 (0.9985-0.9999)	***		Superasteridae	superior	superior	0.9998	superior	0.999 (0.9980-0.9999)	***		Superasteridae
201_A. Perianth presence (D2c)	Superasteridae	present	present	1	present	1 (0.9999-1.0000)	***		Superasteridae	present	present	1	present	1 (1-1)	***		Superasteridae	present	present	1	present	1 (1-1)	***		Superasteridae	present	present	1	present	1 (1-1)	***		Superasteridae	present	present	1	present	1 (1-1)	***		Superasteridae	present	present	1	present	1 (0.9999-1.0000)	***		Superasteridae
201_B. Number of perianth parts (3-state) (D2c)	Superasteridae	six to ten (6-10)	six to ten (6-10)	0.9979	six to ten (6-10)	0.8997 (0.3397-0.9999)	*		Superasteridae	six to ten (6-10)	six to ten (6-10)	0.9984	six to ten (6-10)	0.9574 (0.7708-1.0000)	**		Superasteridae	six to ten (6-10)	six to ten (6-10)	0.9974	six to ten (6-10)	0.8521 (0.4978-1.0000)	*		Superasteridae	six to ten (6-10)	six to ten (6-10)	0.9982	six to ten (6-10)	0.855 (0.1366-1.0000)	*		Superasteridae	six to ten (6-10)	six to ten (6-10)	0.9946	six to ten (6-10)	0.9161 (0.2832-1.0000)	*		Superasteridae	six to ten (6-10)	six to ten (6-10)	0.9966	six to ten (6-10)	0.9331 (0.5538-0.9999)	**		Superasteridae
201_C. Number of perianth parts (binary) (D2c)	Superasteridae	more than six (>6)	more than six (>6)	1	more than six (>6)	1 (1-1)	***		Superasteridae	more than six (>6)	more than six (>6)	1	more than six (>6)	0.9999 (0.9994-1.0000)	***		Superasteridae	more than six (>6)	more than six (>6)	1	more than six (>6)	0.9999 (0.9995-1.0000)	***		Superasteridae	more than six (>6)	more than six (>6)	1	more than six (>6)	0.9999 (0.9994-1.0000)	***		Superasteridae	more than six (>6)	more than six (>6)	1	more than six (>6)	0.9997 (0.9992-1.0000)	***		Superasteridae	more than six (>6)	more than six (>6)	1	more than six (>6)	1 (1-1)	***		Superasteridae
230_A. Perianth phyllotaxy (binary) (D2d)	Superasteridae	whorled	whorled	0.9925	whorled	0.9924 (0.956-1.000)	***		Superasteridae	whorled	spiral	1	whorled	0.9807 (0.8932-1.0000)	*		Superasteridae	whorled	whorled	0.9835	whorled	0.9898 (0.9267-1.0000)	**		Superasteridae	whorled	whorled	0.9806	whorled	0.9848 (0.9082-1.0000)	**		Superasteridae	whorled	whorled	0.9777	whorled	0.9865 (0.9138-1.0000)	**		Superasteridae	whorled	whorled	0.9919	whorled	0.9944 (0.9616-1.0000)	***		Superasteridae
231_A. Number of perianth whorls (D2c)	Superasteridae	two (2)	two (2)	0.9998	two (2)	0.9829 (0.9075-1.0000)	**		Superasteridae	two (2)	two (2)	0.9998	two (2)	0.9889 (0.9407-1.0000)	**		Superasteridae	two (2)	two (2)	0.9998	two (2)	0.9877 (0.9381-1.0000)	**		Superasteridae	two (2)	two (2)	0.9998	two (2)	0.9866 (0.9294-1.0000)	**		Superasteridae	two (2)	two (2)	0.9998	two (2)	0.9795 (0.8987-1.0000)	**		Superasteridae	two (2)	two (2)	0.9993	two (2)	0.9808 (0.8981-1.0000)	**		Superasteridae
232_A. Perianth merism (4-state) (D2c)	Superasteridae	pentamerous	pentamerous	1	pentamerous	0.9982 (0.9960-0.9999)	***		Superasteridae	pentamerous	pentamerous	1	pentamerous	0.9986 (0.9969-1.0000)	***		Superasteridae	pentamerous	pentamerous	1	pentamerous	0.9987 (0.9971-1.0000)	***		Superasteridae	pentamerous	pentamerous	0.9999	pentamerous	0.9982 (0.996-1.000)	***		Superasteridae	pentamerous	pentamerous	0.9998	pentamerous	0.9986 (0.9972-1.0000)	***		Superasteridae	pentamerous	pentamerous	0.9999	pentamerous	0.9976 (0.9951-0.9998)	***		Superasteridae
232_B. Perianth merism (3-state) (D2c)	Superasteridae	pentamerous	pentamerous	1	pentamerous	0.9986 (0.9972-0.9997)	***		Superasteridae	pentamerous	pentamerous	1	pentamerous	0.999 (0.9973-1.0000)	***		Superasteridae	pentamerous	pentamerous	1	pentamerous	0.9988 (0.997-1.000)	***		Superasteridae	pentamerous	pentamerous	0.9999	pentamerous	0.998 (0.9949-1.0000)	***		Superasteridae	pentamerous	pentamerous	0.9998	pentamerous	0.9991 (0.9983-1.0000)	***		Superasteridae	pentamerous	pentamerous	0.9999	pentamerous	0.998 (0.9962-0.9995)	***		Superasteridae
234_A. Perianth differentiation (binary) (D2d)	Superasteridae	differentiated	differentiated	0.9656	differentiated	0.894 (0.5921-0.9997)	**		Superasteridae	differentiated	differentiated	0.9488	differentiated	0.7837 (0.000-0.999)	*		Superasteridae	differentiated	differentiated	0.9492	differentiated	0.8762 (0.3877-1.0000)	*		Superasteridae	differentiated	differentiated	0.9576	differentiated	0.8836 (0.5173-1.0000)	**		Superasteridae	differentiated	differentiated	0.9429	differentiated	0.8917 (0.5134-1.0000)	**		Superasteridae	differentiated	differentiated	0.9545	differentiated	0.8998 (0.6091-0.9997)	**		Superasteridae
204_A. Fusion of perianth (D2c)	Superasteridae	free (<5%)	free (<5%)	0.9753	fused (>5%)	0.8002 (0.6837-0.8976)	*		Superasteridae	free (<5%)	free (<5%)	0.9904	fused (>5%)	0.5994 (0.0790-0.8823)	*		Superasteridae	free (<5%) / fused (>5%)	free (<5%)	0.9935	fused (>5%)	0.6401 (0.0686-0.8647)	*		Superasteridae	free (<5%)	free (<5%)	0.9905	fused (>5%)	0.6343 (0.0794-0.8691)	*		Superasteridae	free (<5%)	free (<5%)	0.9994	fused (>5%)	0.6008 (0.0889-0.8922)	*		Superasteridae	free (<5%)	free (<5%)	0.9652	fused (>5%)	0.7859 (0.6816-0.8773)	*		Superasteridae
207_A. Symmetry of perianth (binary) (D2d)	Superasteridae	actinomorphic	actinomorphic	1	actinomorphic	0.9947 (0.9875-1.0000)	***		Superasteridae	actinomorphic	actinomorphic	1	actinomorphic	0.996 (0.9896-1.0000)	***		Superasteridae	actinomorphic	actinomorphic	1	actinomorphic	0.9978 (0.9912-1.0000)	***		Superasteridae	actinomorphic	actinomorphic	1	actinomorphic	0.9972 (0.9925-1.0000)	***		Superasteridae	actinomorphic	actinomorphic	1	actinomorphic	0.9982 (0.9929-1.0000)	***		Superasteridae	actinomorphic	actinomorphic	1	actinomorphic	0.9926 (0.9793-1.0000)	***		Superasteridae
301_B. Number of fertile stamens (3-state) (D2c)	Superasteridae	six to ten (6-10)	more than ten (>10)	1	more than ten (>10)	0.9298 (0.0841-1.0000)	*		Superasteridae	six to ten (6-10)	more than ten (>10)	1	more than ten (>10)	0.7756 (0.0411-1.0000)	*		Superasteridae	six to ten (6-10)	more than ten (>10)	1	more than ten (>10)	0.8223 (0.0222-1.0000)	*		Superasteridae	six to ten (6-10)	more than ten (>10)	1	more than ten (>10)	0.7858 (0.0425-1.0000)	*		Superasteridae	six to ten (6-10)	more than ten (>10)	1	more than ten (>10)	0.5416 (0.0058-1.0000)	*		Superasteridae	six to ten (6-10)	more than ten (>10)	1	more than ten (>10)	0.8186 (0.053-1.000)	*		Superasteridae
301_C. Number of fertile stamens (binary) (D2c)	Superasteridae	more than six (>6)	more than six (>6)	1	more than six (>6)	1 (0.9999-1.0000)	***		Superasteridae	more than six (>6)	more than six (>6)	1	more than six (>6)	0.9999 (0.9997-1.0000)	***		Superasteridae	more than six (>6)	more than six (>6)	1	more than six (>6)	1 (0.9998-1.0000)	***		Superasteridae	more than six (>6)	more than six (>6)	1	more than six (>6)	0.9999 (0.9998-1.0000)	***		Superasteridae	more than six (>6)	more than six (>6)	1	more than six (>6)	1 (0.9999-1.0000)	***		Superasteridae	more than six (>6)	more than six (>6)	1	more than six (>6)	1 (0.9999-1.0000)	***		Superasteridae
330_A. Androecium structural phyllotaxy (binary) (D2d)	Superasteridae	whorled	whorled	1	whorled	0.9993 (0.9969-1.0000)	***		Superasteridae	whorled	whorled	0.9992	whorled	0.9995 (0.9994-1.0000)	***		Superasteridae	whorled	whorled	1	whorled	0.9994 (0.9984-1.0000)	***		Superasteridae	whorled	whorled	1	whorled	0.9995 (0.9978-1.0000)	***		Superasteridae	whorled	whorled	0.9975	whorled	0.9992 (0.9946-1.0000)	***		Superasteridae	whorled	whorled	0.9992	whorled	0.9996 (0.9998-1.0000)	***		Superasteridae
331_A. Number of androecium structural whorls (3-state) (D2c)	Superasteridae	one (1)	two (2)	0.9959	two (2)	0.9884 (0.9753-1.0000)	**		Superasteridae	one (1)	two (2)	0.9962	two (2)	0.9909 (0.9793-1.0000)	**		Superasteridae	one (1)	two (2)	1	two (2)	0.9919 (0.9781-1.0000)	**		Superasteridae	one (1)	two (2)	0.9984	two (2)	0.9924 (0.9797-1.0000)	**		Superasteridae	one (1)	two (2)	1	two (2)	0.9924 (0.9809-1.0000)	**		Superasteridae	one (1)	two (2)	0.9948	two (2)	0.7243 (0.273-1.000)	*		Superasteridae
332_A. Androecium structural merism (4-state) (D2c)	Superasteridae	pentamerous	pentamerous	1	tetramerous	0.859 (0.0011-1.0000)	*		Superasteridae	pentamerous	pentamerous	1	tetramerous	0.8183 (0.0007-1.0000)	*		Superasteridae	pentamerous	pentamerous	0.9991	tetramerous	0.5366 (0-1)	*		Superasteridae	pentamerous	tetramerous	0.8229	tetramerous	0.8678 (0.0004-1.0000)	*		Superasteridae	pentamerous	pentamerous	0.9708	tetramerous	0.6879 (0.0005-1.0000)	*		Superasteridae	pentamerous	pentamerous	1	tetramerous	0.9908 (0.9781-1.0000)	*		Superasteridae
332_B. Androecium structural merism (3-state) (D2c)	Superasteridae	pentamerous	tetramerous	1	tetramerous	0.6 (0.0004-1.0000)	*		Superasteridae	pentamerous	pentamerous	1	pentamerous	1 (1-1)	***		Superasteridae	pentamerous	pentamerous	1	pentamerous	0.5584 (0-1)	*		Superasteridae	pentamerous	tetramerous	1	pentamerous	0.9988 (0.99-1.00)	*		Superasteridae	pentamerous	pentamerous	0.9999	pentamerous	1 (1-1)	***		Superasteridae	pentamerous	tetramerous	1	pentamerous	0.999 (0.9917-1.0000)	*		Superasteridae
305_A. Filament (binary) (D2d)	Superasteridae	typical (narrow)	typical (narrow)	0.9997	typical (narrow)	0.9956 (0.9815-1.0000)	***		Superasteridae	typical (narrow)	typical (narrow)	0.9994	typical (narrow)	0.9932 (0.9735-1.0000)	***		Superasteridae	typical (narrow)	typical (narrow)	0.9997	typical (narrow)	0.9925 (0.9702-1.0000)	***		Superasteridae	typical (narrow)	typical (narrow)	0.9995	typical (narrow)	0.9938 (0.9746-1.0000)	***		Superasteridae	typical (narrow)	typical (narrow)	0.9981	typical (narrow)	0.9918 (0.9745-1.0000)	***		Superasteridae	typical (narrow)	typical (narrow)	0.9999	typical (narrow)	0.9965 (0.9847-0.9999)	***		Superasteridae
311_A. Anther orientation (D2d)	Superasteridae	introrse	introrse	0.9999	introrse	0.9854 (0.968-1.000)	***		Superasteridae	introrse	introrse	1	introrse	0.9888 (0.9701-1.0000)	***		Superasteridae	introrse	introrse	0.9999	introrse	0.9882 (0.9721-1.0000)	***		Superasteridae	introrse	introrse	1	introrse	0.9799 (0.9625-1.0000)	***		Superasteridae	introrse	introrse	1	introrse	0.9881 (0.9736-1.0000)	***		Superasteridae	introrse	introrse	0.9998	introrse	0.9723 (0.9439-0.9995)	**		Superasteridae
312_A. Anther attachment (binary) (D2d)	Superasteridae	basifixed	dorsifixed	0.92	basifixed	0.7634 (0.6033-0.9165)	*		Superasteridae	basifixed	dorsifixed	0.9059	basifixed	0.7265 (0.3436-0.9177)	*		Superasteridae	basifixed	dorsifixed	0.8979	basifixed	0.7115 (0.3474-0.9069)	*		Superasteridae	basifixed	dorsifixed	0.8927	basifixed	0.7895 (0.6377-0.9321)	*		Superasteridae	basifixed	dorsifixed	0.7638	basifixed	0.6998 (0.3383-0.9100)	*		Superasteridae	basifixed	dorsifixed	0.9568	basifixed	0.7383 (0.5761-0.8920)	*		Superasteridae
313_A. Anther dehiscence (3-state) (D2d)	Superasteridae	longitudinal slit	longitudinal slit	1	longitudinal slit	0.993 (0.9522-1.0000)	***		Superasteridae	longitudinal slit	longitudinal slit	1	longitudinal slit	0.9613 (0.9244-1.0000)	**		Superasteridae	longitudinal slit	longitudinal slit	1	longitudinal slit	0.9502 (0.9064-1.0000)	**		Superasteridae	longitudinal slit	longitudinal slit	1	longitudinal slit	0.9332 (0-1)	*		Superasteridae	longitudinal slit	longitudinal slit	1	longitudinal slit	0.969 (0.9419-1.0000)	**		Superasteridae	longitudinal slit	longitudinal slit	1	longitudinal slit	0.9912 (0.9421-1.0000)	**		Superasteridae
401_B. Number of structural carpels (5-state) (D2c)	Superasteridae	three (3) / four or five (4-5)	three (3)	0.9999	four or five (4-5)	0.9793 (0.8714-1.0000)	*		Superasteridae	three (3) / four or five (4-5)	four or five (4-5)	0.9999	four or five (4-5)	0.9446 (0.7479-1.0000)	*		Superasteridae	four or five (4-5)	three (3)	0.9999	four or five (4-5)	0.9301 (0.7702-1.0000)	*		Superasteridae	three (3)	four or five (4-5)	0.9998	four or five (4-5)	0.9543 (0.7891-1.0000)	*		Superasteridae	three (3) / four or five (4-5)	four or five (4-5)	0.9999	four or five (4-5)	0.9832 (0.9186-1.0000)	*		Superasteridae	three (3) / four or five (4-5)	four or five (4-5)	0.9999	four or five (4-5)	0.9459 (0.7628-0.9999)	*		Superasteridae
400_A. Gynoecium phyllotaxy (D2d)	Superasteridae	whorled	whorled	0.988	whorled	0.9908 (0.9779-1.0000)	***		Superasteridae	whorled	whorled	0.9928	whorled	0.9923 (0.9793-1.0000)	***		Superasteridae	whorled	whorled	0.9876	whorled	0.9912 (0.9773-1.0000)	***		Superasteridae	whorled	whorled	0.995	whorled	0.993 (0.9799-1.0000)	***		Superasteridae	whorled	whorled	0.9746	whorled	0.9909 (0.9775-1.0000)	***		Superasteridae	whorled	whorled	0.984	whorled	0.9902 (0.974-1.000)	***		Superasteridae
403_A. Fusion of ovaries (binary) (D2c)	Superasteridae	fused (>5%)	fused (>5%)	0.9963	fused (>5%)	0.9324 (0.8257-1.0000)	**		Superasteridae	fused (>5%)	fused (>5%)	0.9979	fused (>5%)	0.9645 (0.8672-1.0000)	**		Superasteridae	fused (>5%)	fused (>5%)	0.9953	fused (>5%)	0.9516 (0.8463-1.0000)	**		Superasteridae	fused (>5%)	fused (>5%)	0.9999	fused (>5%)	0.9716 (0.8662-1.0000)	**		Superasteridae	fused (>5%)	fused (>5%)	0.9944	fused (>5%)	0.9489 (0.8568-1.0000)	**		Superasteridae	fused (>5%)	fused (>5%)	0.9957	fused (>5%)	0.9635 (0.8547-0.9984)	**		Superasteridae
411_A. Number of ovules per functional carpel (3-state) (D2c)	Superasteridae	three or more (>2)	three or more (>2)	0.9999	three or more (>2)	0.9953 (0.989-1.000)	***		Superasteridae	three or more (>2)	three or more (>2)	0.9998	three or more (>2)	0.9859 (0.9708-1.0000)	***		Superasteridae	three or more (>2)	three or more (>2)	0.9998	three or more (>2)	0.9954 (0.985-1.000)	***		Superasteridae	one (1) / two (2)	three or more (>2)	0.9998	three or more (>2)	0.9864 (0.9758-1.0000)	**		Superasteridae	three or more (>2)	three or more (>2)	1	three or more (>2)	0.9914 (0.9836-1.0000)	***		Superasteridae	three or more (>2)	three or more (>2)	0.9997	three or more (>2)	0.9907 (0.9779-1.0000)	***		Superasteridae
100_A. Functional sex of flowers (D2d)	Asteridae	bisexual	bisexual	1	bisexual	0.9998 (0.9988-1.0000)	***		Asteridae	bisexual	bisexual	1	bisexual	0.9999 (0.9995-1.0000)	***		Asteridae	bisexual	bisexual	1	bisexual	0.9998 (0.9992-1.0000)	***		Asteridae	bisexual	bisexual	1	bisexual	0.9997 (0.9991-1.0000)	***		Asteridae	bisexual	bisexual	1	bisexual	0.9999 (0.9993-1.0000)	***		Asteridae	bisexual	bisexual	1	bisexual	0.9997 (0.9984-1.0000)	***		Asteridae
100_B. Structural sex of flowers (D2d)	Asteridae	bisexual	bisexual	1	bisexual	0.9997 (0.9993-1.0000)	***		Asteridae	bisexual	bisexual	1	bisexual	0.9999 (0.9998-1.0000)	***		Asteridae	bisexual	bisexual	1	bisexual	0.9999 (0.9998-1.0000)	***		Asteridae	bisexual	bisexual	1	bisexual	0.9999 (0.9998-1.0000)	***		Asteridae	bisexual	bisexual	1	bisexual	0.9999 (0.9998-1.0000)	***		Asteridae	bisexual	bisexual	1	bisexual	0.9996 (0.999-1.000)	***		Asteridae
102_B. Ovary position (binary) (D2d)	Asteridae	superior	superior	0.9728	superior	0.756 (0.6494-0.8673)	**		Asteridae	superior	superior	0.9773	superior	0.7633 (0.5959-0.8747)	**		Asteridae	superior	superior	0.9785	superior	0.7823 (0.5938-0.9036)	**		Asteridae	superior	superior	0.9789	superior	0.695 (0.5402-0.8310)	**		Asteridae	superior	superior	0.9873	superior	0.6769 (0.4629-0.7905)	*		Asteridae	superior	superior	0.9521	superior	0.8024 (0.6843-0.9345)	**		Asteridae
201_A. Perianth presence (D2c)	Asteridae	present	present	1	present	1 (1-1)	***		Asteridae	present	present	1	present	1 (1-1)	***		Asteridae	present	present	1	present	1 (1-1)	***		Asteridae	present	present	1	present	1 (1-1)	***		Asteridae	present	present	1	present	1 (1-1)	***		Asteridae	present	present	1	present	1 (1-1)	***		Asteridae
201_B. Number of perianth parts (3-state) (D2c)	Asteridae	six to ten (6-10)	six to ten (6-10)	0.9999	six to ten (6-10)	0.9895 (0.9665-0.9999)	***		Asteridae	six to ten (6-10)	six to ten (6-10)	1	six to ten (6-10)	0.991 (0.9701-1.0000)	***		Asteridae	six to ten (6-10)	six to ten (6-10)	1	six to ten (6-10)	0.8649 (0.4991-0.9999)	*		Asteridae	six to ten (6-10)	six to ten (6-10)	1	six to ten (6-10)	0.9855 (0.9471-1.0000)	**		Asteridae	six to ten (6-10)	six to ten (6-10)	0.9999	six to ten (6-10)	0.9882 (0.9568-1.0000)	***		Asteridae	six to ten (6-10)	six to ten (6-10)	0.9999	six to ten (6-10)	0.9933 (0.9761-0.9999)	***		Asteridae
201_C. Number of perianth parts (binary) (D2c)	Asteridae	more than six (>6)	more than six (>6)	1	more than six (>6)	1 (1-1)	***		Asteridae	more than six (>6)	more than six (>6)	1	more than six (>6)	0.9999 (0.9997-1.0000)	***		Asteridae	more than six (>6)	more than six (>6)	1	more than six (>6)	1 (0.9998-1.0000)	***		Asteridae	more than six (>6)	more than six (>6)	1	more than six (>6)	1 (0.9998-1.0000)	***		Asteridae	more than six (>6)	more than six (>6)	1	more than six (>6)	0.9999 (0.9995-1.0000)	***		Asteridae	more than six (>6)	more than six (>6)	1	more than six (>6)	1 (1-1)	***		Asteridae
230_A. Perianth phyllotaxy (binary) (D2d)	Asteridae	whorled	whorled	0.9996	whorled	0.9981 (0.9885-1.0000)	***		Asteridae	whorled	spiral	1	whorled	0.9979 (0.9891-1.0000)	*		Asteridae	whorled	whorled	0.9997	whorled	0.9987 (0.9916-1.0000)	***		Asteridae	whorled	whorled	0.9995	whorled	0.998 (0.9887-1.0000)	***		Asteridae	whorled	whorled	0.9995	whorled	0.9979 (0.9884-1.0000)	***		Asteridae	whorled	whorled	0.9996	whorled	0.9987 (0.9909-1.0000)	***		Asteridae
231_A. Number of perianth whorls (D2c)	Asteridae	two (2)	two (2)	0.9999	two (2)	0.9991 (0.9966-1.0000)	***		Asteridae	two (2)	two (2)	0.9999	two (2)	0.9987 (0.9952-1.0000)	***		Asteridae	two (2)	two (2)	0.9998	two (2)	0.9993 (0.9975-1.0000)	***		Asteridae	two (2)	two (2)	0.9999	two (2)	0.999 (0.9964-1.0000)	***		Asteridae	two (2)	two (2)	0.9998	two (2)	0.9986 (0.9954-1.0000)	***		Asteridae	two (2)	two (2)	0.9998	two (2)	0.9982 (0.9934-1.0000)	***		Asteridae
232_A. Perianth merism (4-state) (D2c)	Asteridae	pentamerous	pentamerous	0.9999	pentamerous	0.9975 (0.9954-1.0000)	***		Asteridae	pentamerous	pentamerous	1	pentamerous	0.9983 (0.9963-0.9999)	***		Asteridae	pentamerous	pentamerous	1	pentamerous	0.9982 (0.9961-0.9999)	***		Asteridae	pentamerous	pentamerous	1	pentamerous	0.9983 (0.9963-0.9999)	***		Asteridae	pentamerous	pentamerous	1	pentamerous	0.9976 (0.9957-0.9999)	***		Asteridae	pentamerous	pentamerous	0.9999	pentamerous	0.9967 (0.9938-0.9998)	***		Asteridae
232_B. Perianth merism (3-state) (D2c)	Asteridae	pentamerous	pentamerous	0.9999	pentamerous	0.9967 (0.9936-0.9996)	***		Asteridae	pentamerous	pentamerous	1	pentamerous	0.9978 (0.9957-1.0000)	***		Asteridae	pentamerous	pentamerous	0.9999	pentamerous	0.9972 (0.9943-0.9995)	***		Asteridae	pentamerous	pentamerous	1	pentamerous	0.9974 (0.9946-0.9997)	***		Asteridae	pentamerous	pentamerous	1	pentamerous	0.9974 (0.9947-0.9996)	***		Asteridae	pentamerous	pentamerous	0.9999	pentamerous	0.9958 (0.9923-0.9989)	***		Asteridae
234_A. Perianth differentiation (binary) (D2d)	Asteridae	differentiated	differentiated	0.9988	differentiated	0.9993 (0.9981-1.0000)	***		Asteridae	differentiated	differentiated	0.9985	differentiated	0.8894 (0.0000-0.9999)	*		Asteridae	differentiated	differentiated	0.9982	differentiated	0.9993 (0.9982-1.0000)	***		Asteridae	differentiated	differentiated	0.9986	differentiated	0.9993 (0.9981-1.0000)	***		Asteridae	differentiated	differentiated	0.9977	differentiated	0.9992 (0.9978-1.0000)	***		Asteridae	differentiated	differentiated	0.9984	differentiated	0.999 (0.9971-1.0000)	***		Asteridae
204_A. Fusion of perianth (D2c)	Asteridae	free (<5%)	free (<5%)	0.7569	fused (>5%)	0.9066 (0.8467-0.9644)	*		Asteridae	free (<5%)	free (<5%)	0.8253	fused (>5%)	0.9052 (0.8450-0.9661)	*		Asteridae	free (<5%)	free (<5%)	0.8548	fused (>5%)	0.915 (0.8544-0.9615)	*		Asteridae	free (<5%)	free (<5%)	0.8428	fused (>5%)	0.9087 (0.8584-0.9518)	*		Asteridae	free (<5%)	free (<5%)	0.8583	fused (>5%)	0.9123 (0.8531-0.9650)	*		Asteridae	free (<5%)	free (<5%)	0.697	fused (>5%)	0.9107 (0.8496-0.9613)	*		Asteridae
207_A. Symmetry of perianth (binary) (D2d)	Asteridae	actinomorphic	actinomorphic	1	actinomorphic	0.9962 (0.9914-1.0000)	***		Asteridae	actinomorphic	actinomorphic	1	actinomorphic	0.9973 (0.9944-1.0000)	***		Asteridae	actinomorphic	actinomorphic	1	actinomorphic	0.999 (0.9964-1.0000)	***		Asteridae	actinomorphic	actinomorphic	1	actinomorphic	0.9976 (0.9951-1.0000)	***		Asteridae	actinomorphic	actinomorphic	1	actinomorphic	0.9989 (0.996-1.000)	***		Asteridae	actinomorphic	actinomorphic	1	actinomorphic	0.9951 (0.9867-1.0000)	***		Asteridae
301_B. Number of fertile stamens (3-state) (D2c)	Asteridae	one to five (1-5) / six to ten (6-10)	more than ten (>10)	0.9994	more than ten (>10)	0.9541 (0.6991-1.0000)	*		Asteridae	one to five (1-5) / six to ten (6-10)	more than ten (>10)	0.9993	more than ten (>10)	0.8969 (0.6100-0.9999)	*		Asteridae	one to five (1-5) / six to ten (6-10)	more than ten (>10)	0.9994	more than ten (>10)	0.905 (0.5989-0.9999)	*		Asteridae	one to five (1-5) / six to ten (6-10)	more than ten (>10)	0.9994	more than ten (>10)	0.8902 (0.5964-1.0000)	*		Asteridae	one to five (1-5) / six to ten (6-10)	more than ten (>10)	0.9993	more than ten (>10)	0.7856 (0.5478-0.9997)	*		Asteridae	one to five (1-5) / six to ten (6-10)	more than ten (>10)	0.9987	more than ten (>10)	0.896 (0.5892-0.9999)	*		Asteridae
301_C. Number of fertile stamens (binary) (D2c)	Asteridae	more than six (>6)	more than six (>6)	0.9999	more than six (>6)	0.996 (0.987-1.000)	***		Asteridae	more than six (>6)	more than six (>6)	0.9999	more than six (>6)	0.9963 (0.9886-1.0000)	***		Asteridae	one to six (1-6) / more than six (>6)	more than six (>6)	0.9999	more than six (>6)	0.9947 (0.9822-1.0000)	**		Asteridae	one to six (1-6) / more than six (>6)	more than six (>6)	0.9999	more than six (>6)	0.9938 (0.9791-1.0000)	**		Asteridae	more than six (>6)	more than six (>6)	0.9999	more than six (>6)	0.9947 (0.9831-1.0000)	***		Asteridae	more than six (>6)	more than six (>6)	0.9998	more than six (>6)	0.9943 (0.981-1.000)	***		Asteridae
330_A. Androecium structural phyllotaxy (binary) (D2d)	Asteridae	whorled	whorled	1	whorled	0.9996 (0.9985-1.0000)	***		Asteridae	whorled	whorled	1	whorled	0.9997 (0.9996-1.0000)	***		Asteridae	whorled	whorled	1	whorled	0.9997 (0.999-1.000)	***		Asteridae	whorled	whorled	1	whorled	0.9996 (0.9979-1.0000)	***		Asteridae	whorled	whorled	1	whorled	0.9995 (0.9968-1.0000)	***		Asteridae	whorled	whorled	1	whorled	0.9998 (1-1)	***		Asteridae
331_A. Number of androecium structural whorls (3-state) (D2c)	Asteridae	one (1)	two (2)	0.9999	two (2)	0.9851 (0.932-1.000)	*		Asteridae	one (1)	two (2)	0.9998	two (2)	0.9843 (0.9447-1.0000)	*		Asteridae	one (1)	two (2)	1	two (2)	0.9889 (0.9509-1.0000)	**		Asteridae	one (1)	two (2)	0.9999	two (2)	0.9884 (0.9421-1.0000)	*		Asteridae	one (1)	two (2)	1	two (2)	0.9872 (0.9386-1.0000)	*		Asteridae	one (1)	two (2)	0.9999	two (2)	0.5977 (0.1292-1.0000)	*		Asteridae
332_A. Androecium structural merism (4-state) (D2c)	Asteridae	pentamerous	pentamerous	0.9995	tetramerous	0.8582 (0.0139-1.0000)	*		Asteridae	pentamerous	pentamerous	0.9996	tetramerous	0.8156 (0.0123-1.0000)	*		Asteridae	pentamerous	pentamerous	0.9998	tetramerous	0.5435 (0.0055-1.0000)	*		Asteridae	pentamerous	tetramerous	0.5847	tetramerous	0.865 (0.014-1.000)	*		Asteridae	pentamerous	pentamerous	0.9957	tetramerous	0.6889 (0.0084-1.0000)	*		Asteridae	pentamerous	pentamerous	0.9993	tetramerous	0.9863 (0.9514-1.0000)	*		Asteridae
332_B. Androecium structural merism (3-state) (D2c)	Asteridae	pentamerous	tetramerous	1	tetramerous	0.6073 (0.0113-1.0000)	*		Asteridae	pentamerous	pentamerous	0.9996	pentamerous	1 (1-1)	***		Asteridae	pentamerous	pentamerous	0.9996	pentamerous	0.5566 (0-1)	*		Asteridae	pentamerous	tetramerous	1	pentamerous	0.9971 (0.9752-1.0000)	*		Asteridae	pentamerous	pentamerous	0.9997	pentamerous	1 (1-1)	***		Asteridae	pentamerous	tetramerous	1	pentamerous	0.9966 (0.9718-1.0000)	*		Asteridae
305_A. Filament (binary) (D2d)	Asteridae	typical (narrow)	typical (narrow)	0.9998	typical (narrow)	0.9947 (0.9767-1.0000)	***		Asteridae	typical (narrow)	typical (narrow)	0.9996	typical (narrow)	0.9911 (0.9613-1.0000)	***		Asteridae	typical (narrow)	typical (narrow)	0.9998	typical (narrow)	0.9899 (0.9535-1.0000)	***		Asteridae	typical (narrow)	typical (narrow)	0.9997	typical (narrow)	0.9913 (0.9581-1.0000)	***		Asteridae	typical (narrow)	typical (narrow)	0.9995	typical (narrow)	0.9884 (0.9499-1.0000)	**		Asteridae	typical (narrow)	typical (narrow)	0.9998	typical (narrow)	0.9971 (0.9869-1.0000)	***		Asteridae
311_A. Anther orientation (D2d)	Asteridae	introrse	introrse	0.9998	introrse	0.9928 (0.9852-1.0000)	***		Asteridae	introrse	introrse	0.9996	introrse	0.9912 (0.9816-1.0000)	***		Asteridae	introrse	introrse	0.9997	introrse	0.9913 (0.9823-1.0000)	***		Asteridae	introrse	introrse	0.9998	introrse	0.9909 (0.9818-1.0000)	***		Asteridae	introrse	introrse	0.9997	introrse	0.991 (0.9791-1.0000)	***		Asteridae	introrse	introrse	0.9997	introrse	0.9905 (0.9802-0.9981)	***		Asteridae
312_A. Anther attachment (binary) (D2d)	Asteridae	basifixed	dorsifixed	0.9182	basifixed	0.9105 (0.8287-0.9756)	*		Asteridae	basifixed	dorsifixed	0.9031	basifixed	0.9339 (0.8760-0.9797)	*		Asteridae	basifixed	dorsifixed	0.8989	basifixed	0.9244 (0.8639-0.9776)	*		Asteridae	basifixed	dorsifixed	0.874	basifixed	0.9346 (0.879-0.979)	*		Asteridae	basifixed	dorsifixed	0.7705	basifixed	0.9217 (0.8558-0.9761)	*		Asteridae	basifixed	dorsifixed	0.9534	basifixed	0.9012 (0.8252-0.9708)	*		Asteridae
313_A. Anther dehiscence (3-state) (D2d)	Asteridae	longitudinal slit	longitudinal slit	1	longitudinal slit	0.9936 (0.956-1.000)	***		Asteridae	longitudinal slit	longitudinal slit	1	longitudinal slit	0.9932 (0.9548-1.0000)	***		Asteridae	longitudinal slit	longitudinal slit	1	longitudinal slit	0.9902 (0.9477-1.0000)	**		Asteridae	longitudinal slit	longitudinal slit	1	longitudinal slit	0.9843 (0.9378-1.0000)	**		Asteridae	longitudinal slit	longitudinal slit	1	longitudinal slit	0.9951 (0.9615-1.0000)	***		Asteridae	longitudinal slit	longitudinal slit	1	longitudinal slit	0.9932 (0.9551-1.0000)	***		Asteridae
401_B. Number of structural carpels (5-state) (D2c)	Asteridae	two (2)	three (3)	0.9944	four or five (4-5)	0.8517 (0.3031-1.0000)	*		Asteridae	two (2) / four or five (4-5)	four or five (4-5)	0.9957	four or five (4-5)	0.8276 (0.3255-0.9999)	*		Asteridae	two (2) / four or five (4-5)	three (3)	0.9958	four or five (4-5)	0.7362 (0.3031-0.9999)	*		Asteridae	two (2) / four or five (4-5)	four or five (4-5)	0.9949	four or five (4-5)	0.8489 (0.4733-0.9999)	*		Asteridae	two (2) / four or five (4-5)	four or five (4-5)	0.9953	four or five (4-5)	0.8472 (0.4228-0.9998)	*		Asteridae	two (2)	four or five (4-5)	0.9831	four or five (4-5)	0.7505 (0.2061-0.9998)	*		Asteridae
400_A. Gynoecium phyllotaxy (D2d)	Asteridae	whorled	whorled	0.9999	whorled	0.995 (0.9867-1.0000)	***		Asteridae	whorled	whorled	1	whorled	0.996 (0.9889-1.0000)	***		Asteridae	whorled	whorled	1	whorled	0.9958 (0.9887-1.0000)	***		Asteridae	whorled	whorled	1	whorled	0.9958 (0.9885-1.0000)	***		Asteridae	whorled	whorled	1	whorled	0.9954 (0.9874-1.0000)	***		Asteridae	whorled	whorled	1	whorled	0.9956 (0.9878-1.0000)	***		Asteridae
403_A. Fusion of ovaries (binary) (D2c)	Asteridae	fused (>5%)	fused (>5%)	1	fused (>5%)	0.9987 (0.9957-1.0000)	***		Asteridae	fused (>5%)	fused (>5%)	1	fused (>5%)	0.999 (0.9961-1.0000)	***		Asteridae	fused (>5%)	fused (>5%)	1	fused (>5%)	0.9988 (0.9959-1.0000)	***		Asteridae	fused (>5%)	fused (>5%)	1	fused (>5%)	0.9988 (0.9956-1.0000)	***		Asteridae	fused (>5%)	fused (>5%)	1	fused (>5%)	0.9988 (0.9954-1.0000)	***		Asteridae	fused (>5%)	fused (>5%)	1	fused (>5%)	0.9995 (0.9974-1.0000)	***		Asteridae
411_A. Number of ovules per functional carpel (3-state) (D2c)	Asteridae	one (1)	three or more (>2)	0.9979	three or more (>2)	0.9953 (0.9799-1.0000)	**		Asteridae	one (1)	three or more (>2)	0.9972	three or more (>2)	0.9884 (0.9792-1.0000)	**		Asteridae	one (1)	three or more (>2)	0.9947	three or more (>2)	0.9958 (0.9814-1.0000)	**		Asteridae	one (1)	three or more (>2)	0.9994	three or more (>2)	0.9894 (0.9789-1.0000)	**		Asteridae	one (1)	three or more (>2)	0.9948	three or more (>2)	0.9903 (0.9707-1.0000)	**		Asteridae	one (1)	three or more (>2)	0.9955	three or more (>2)	0.9908 (0.9763-1.0000)	**		Asteridae
100_A. Functional sex of flowers (D2d)	Lamiidae	bisexual	bisexual	1	bisexual	0.9995 (0.9973-1.0000)	***		Lamiidae	bisexual	bisexual	1	bisexual	0.9995 (0.9971-1.0000)	***		Lamiidae	bisexual	bisexual	1	bisexual	0.9987 (0.9954-1.0000)	***		Lamiidae	bisexual	bisexual	1	bisexual	0.9987 (0.9957-1.0000)	***		Lamiidae	bisexual	bisexual	1	bisexual	0.9995 (0.9967-1.0000)	***		Lamiidae	bisexual	bisexual	1	bisexual	0.9994 (0.9965-1.0000)	***		Lamiidae
100_B. Structural sex of flowers (D2d)	Lamiidae	bisexual	bisexual	0.9999	bisexual	0.9994 (0.9986-0.9999)	***		Lamiidae	bisexual	bisexual	0.9999	bisexual	0.9993 (0.9985-0.9999)	***		Lamiidae	bisexual	bisexual	0.9999	bisexual	0.9992 (0.9981-1.0000)	***		Lamiidae	bisexual	bisexual	0.9998	bisexual	0.9992 (0.9983-0.9999)	***		Lamiidae	bisexual	bisexual	0.9999	bisexual	0.9993 (0.9984-0.9999)	***		Lamiidae	bisexual	bisexual	0.9999	bisexual	0.9992 (0.9983-0.9999)	***		Lamiidae
102_B. Ovary position (binary) (D2d)	Lamiidae	superior	superior	0.9734	superior	0.9662 (0.9438-0.9935)	**		Lamiidae	superior	superior	0.9816	superior	0.968 (0.9376-0.9892)	**		Lamiidae	superior	superior	0.9791	superior	0.9685 (0.9464-0.9872)	**		Lamiidae	superior	superior	0.9784	superior	0.9691 (0.9350-0.9917)	**		Lamiidae	superior	superior	0.9886	superior	0.9692 (0.9437-0.9872)	**		Lamiidae	superior	superior	0.9575	superior	0.965 (0.9293-0.9888)	**		Lamiidae
201_A. Perianth presence (D2c)	Lamiidae	present	present	1	present	0.9999 (0.9998-1.0000)	***		Lamiidae	present	present	1	present	0.9999 (0.9998-1.0000)	***		Lamiidae	present	present	1	present	0.9999 (0.9998-1.0000)	***		Lamiidae	present	present	1	present	0.9999 (0.9998-1.0000)	***		Lamiidae	present	present	1	present	0.9999 (0.9998-1.0000)	***		Lamiidae	present	present	1	present	0.9999 (0.9998-1.0000)	***		Lamiidae
201_B. Number of perianth parts (3-state) (D2c)	Lamiidae	six to ten (6-10)	six to ten (6-10)	0.9998	six to ten (6-10)	0.9849 (0.9618-0.9995)	***		Lamiidae	six to ten (6-10)	six to ten (6-10)	0.9999	six to ten (6-10)	0.9906 (0.9736-0.9994)	***		Lamiidae	six to ten (6-10)	six to ten (6-10)	0.9999	six to ten (6-10)	0.8624 (0.4941-0.9993)	*		Lamiidae	six to ten (6-10)	six to ten (6-10)	0.9998	six to ten (6-10)	0.986 (0.9636-0.9996)	***		Lamiidae	six to ten (6-10)	six to ten (6-10)	0.9999	six to ten (6-10)	0.9854 (0.9610-0.9994)	***		Lamiidae	six to ten (6-10)	six to ten (6-10)	0.9998	six to ten (6-10)	0.9873 (0.9625-0.9994)	***		Lamiidae
201_C. Number of perianth parts (binary) (D2c)	Lamiidae	more than six (>6)	more than six (>6)	1	more than six (>6)	1 (1-1)	***		Lamiidae	more than six (>6)	more than six (>6)	1	more than six (>6)	0.9998 (0.9986-1.0000)	***		Lamiidae	more than six (>6)	more than six (>6)	1	more than six (>6)	0.9997 (0.9983-1.0000)	***		Lamiidae	more than six (>6)	more than six (>6)	1	more than six (>6)	0.9998 (0.9985-1.0000)	***		Lamiidae	more than six (>6)	more than six (>6)	1	more than six (>6)	0.9991 (0.9969-1.0000)	***		Lamiidae	more than six (>6)	more than six (>6)	1	more than six (>6)	1 (1-1)	***		Lamiidae
230_A. Perianth phyllotaxy (binary) (D2d)	Lamiidae	whorled	whorled	1	whorled	0.9948 (0.9675-1.0000)	***		Lamiidae	whorled	whorled	0.9696	whorled	0.9928 (0.9629-1.0000)	***		Lamiidae	whorled	whorled	1	whorled	0.9951 (0.9662-1.0000)	***		Lamiidae	whorled	whorled	0.9999	whorled	0.9936 (0.9634-1.0000)	***		Lamiidae	whorled	whorled	1	whorled	0.9934 (0.9641-1.0000)	***		Lamiidae	whorled	whorled	1	whorled	0.9968 (0.9767-1.0000)	***		Lamiidae
231_A. Number of perianth whorls (D2c)	Lamiidae	two (2)	two (2)	0.9999	two (2)	0.9959 (0.9870-0.9998)	***		Lamiidae	two (2)	two (2)	0.9999	two (2)	0.9962 (0.9884-0.9997)	***		Lamiidae	two (2)	two (2)	0.9999	two (2)	0.9944 (0.9833-1.0000)	***		Lamiidae	two (2)	two (2)	0.9999	two (2)	0.9958 (0.9871-0.9998)	***		Lamiidae	two (2)	two (2)	0.9999	two (2)	0.9945 (0.9846-0.9999)	***		Lamiidae	two (2)	two (2)	0.9999	two (2)	0.9946 (0.9830-0.9996)	***		Lamiidae
232_A. Perianth merism (4-state) (D2c)	Lamiidae	pentamerous	pentamerous	1	pentamerous	0.9969 (0.9935-0.9997)	***		Lamiidae	pentamerous	pentamerous	1	pentamerous	0.9974 (0.9947-0.9996)	***		Lamiidae	pentamerous	pentamerous	1	pentamerous	0.9964 (0.9919-0.9999)	***		Lamiidae	pentamerous	pentamerous	0.9999	pentamerous	0.9968 (0.9926-0.9996)	***		Lamiidae	pentamerous	pentamerous	1	pentamerous	0.9971 (0.9939-0.9995)	***		Lamiidae	pentamerous	pentamerous	1	pentamerous	0.9948 (0.9892-0.9994)	***		Lamiidae
232_B. Perianth merism (3-state) (D2c)	Lamiidae	pentamerous	pentamerous	1	pentamerous	0.9984 (0.9966-0.9998)	***		Lamiidae	pentamerous	pentamerous	1	pentamerous	0.9988 (0.9976-1.0000)	***		Lamiidae	pentamerous	pentamerous	1	pentamerous	0.9981 (0.9959-0.9999)	***		Lamiidae	pentamerous	pentamerous	0.9999	pentamerous	0.9984 (0.9965-0.9998)	***		Lamiidae	pentamerous	pentamerous	1	pentamerous	0.9986 (0.9969-0.9998)	***		Lamiidae	pentamerous	pentamerous	0.9999	pentamerous	0.9976 (0.9948-0.9997)	***		Lamiidae
234_A. Perianth differentiation (binary) (D2d)	Lamiidae	differentiated	differentiated	0.9999	differentiated	0.9956 (0.9885-0.9998)	***		Lamiidae	differentiated	differentiated	0.9999	differentiated	0.8862 (0.0000-0.9991)	*		Lamiidae	differentiated	differentiated	0.9999	differentiated	0.9945 (0.9861-1.0000)	***		Lamiidae	differentiated	differentiated	0.9998	differentiated	0.9952 (0.9884-0.9996)	***		Lamiidae	differentiated	differentiated	0.9998	differentiated	0.995 (0.9874-0.9997)	***		Lamiidae	differentiated	differentiated	0.9999	differentiated	0.9953 (0.9876-0.9997)	***		Lamiidae
204_A. Fusion of perianth (D2c)	Lamiidae	free (<5%)	fused (>5%)	0.9777	fused (>5%)	0.9649 (0.9361-0.9928)	*		Lamiidae	free (<5%) / fused (>5%)	fused (>5%)	0.9686	fused (>5%)	0.9701 (0.9448-0.9906)	*		Lamiidae	free (<5%) / fused (>5%)	fused (>5%)	0.9552	fused (>5%)	0.9587 (0.9111-0.9932)	*		Lamiidae	free (<5%) / fused (>5%)	fused (>5%)	0.9507	fused (>5%)	0.9623 (0.9262-0.9880)	*		Lamiidae	free (<5%) / fused (>5%)	fused (>5%)	0.9506	fused (>5%)	0.963 (0.9251-0.9909)	*		Lamiidae	free (<5%)	fused (>5%)	0.9779	fused (>5%)	0.967 (0.9296-0.9942)	*		Lamiidae
207_A. Symmetry of perianth (binary) (D2d)	Lamiidae	actinomorphic	actinomorphic	0.9988	actinomorphic	0.9071 (0.7290-0.9999)	**		Lamiidae	actinomorphic	actinomorphic	0.996	actinomorphic	0.8859 (0.6231-0.9999)	**		Lamiidae	actinomorphic	actinomorphic	0.9959	actinomorphic	0.9241 (0.6873-0.9998)	**		Lamiidae	actinomorphic	actinomorphic	0.9965	actinomorphic	0.8932 (0.6389-0.9998)	**		Lamiidae	actinomorphic	actinomorphic	0.998	actinomorphic	0.941 (0.7349-0.9999)	**		Lamiidae	actinomorphic	actinomorphic	0.9988	actinomorphic	0.9001 (0.7069-0.9999)	**		Lamiidae
301_B. Number of fertile stamens (3-state) (D2c)	Lamiidae	one to five (1-5)	one to five (1-5)	0.9995	one to five (1-5)	0.9893 (0.9765-0.9980)	***		Lamiidae	one to five (1-5)	one to five (1-5)	0.9995	one to five (1-5)	0.9882 (0.9780-0.9972)	***		Lamiidae	one to five (1-5)	one to five (1-5)	0.9994	one to five (1-5)	0.9847 (0.9687-0.9970)	***		Lamiidae	one to five (1-5)	one to five (1-5)	0.9995	one to five (1-5)	0.9852 (0.9679-0.9979)	***		Lamiidae	one to five (1-5)	one to five (1-5)	0.9994	one to five (1-5)	0.9862 (0.9688-0.9980)	***		Lamiidae	one to five (1-5)	one to five (1-5)	0.9995	one to five (1-5)	0.9896 (0.9761-0.9987)	***		Lamiidae
301_C. Number of fertile stamens (binary) (D2c)	Lamiidae	one to six (1-6)	one to six (1-6)	0.9989	one to six (1-6)	0.9931 (0.9857-0.9981)	***		Lamiidae	one to six (1-6)	one to six (1-6)	0.999	one to six (1-6)	0.9928 (0.9872-0.9982)	***		Lamiidae	one to six (1-6)	one to six (1-6)	0.9987	one to six (1-6)	0.9902 (0.9797-0.9981)	***		Lamiidae	one to six (1-6)	one to six (1-6)	0.999	one to six (1-6)	0.9917 (0.9821-0.9981)	***		Lamiidae	one to six (1-6)	one to six (1-6)	0.9986	one to six (1-6)	0.9919 (0.9824-0.9997)	***		Lamiidae	one to six (1-6)	one to six (1-6)	0.9988	one to six (1-6)	0.9932 (0.9875-0.9980)	***		Lamiidae
330_A. Androecium structural phyllotaxy (binary) (D2d)	Lamiidae	whorled	whorled	1	whorled	0.9991 (0.9951-1.0000)	***		Lamiidae	whorled	whorled	1	whorled	0.9992 (0.9977-1.0000)	***		Lamiidae	whorled	whorled	1	whorled	0.999 (0.9957-1.0000)	***		Lamiidae	whorled	whorled	1	whorled	0.999 (0.9936-1.0000)	***		Lamiidae	whorled	whorled	1	whorled	0.9987 (0.9893-1.0000)	***		Lamiidae	whorled	whorled	1	whorled	0.9996 (0.9998-1.0000)	***		Lamiidae
331_A. Number of androecium structural whorls (3-state) (D2c)	Lamiidae	one (1)	one (1)	0.9986	one (1)	0.9899 (0.9788-0.9982)	***		Lamiidae	one (1)	one (1)	0.9986	one (1)	0.9274 (0.4977-0.9974)	*		Lamiidae	one (1)	one (1)	0.9986	one (1)	0.9889 (0.9750-0.9993)	***		Lamiidae	one (1)	one (1)	0.9987	one (1)	0.9884 (0.9756-0.9982)	***		Lamiidae	one (1)	one (1)	0.9985	one (1)	0.9883 (0.9717-0.9980)	***		Lamiidae	one (1)	one (1)	0.9982	one (1)	0.9235 (0.7255-0.9988)	**		Lamiidae
332_A. Androecium structural merism (4-state) (D2c)	Lamiidae	pentamerous	pentamerous	1	tetramerous	0.779 (0.0007-1.0000)	*		Lamiidae	pentamerous	pentamerous	1	tetramerous	0.6807 (0.002-1.000)	*		Lamiidae	pentamerous	pentamerous	0.9999	pentamerous	0.522 (0.0000-0.9997)	*		Lamiidae	pentamerous	pentamerous	0.7485	tetramerous	0.7336 (0.0003-1.0000)	*		Lamiidae	pentamerous	pentamerous	0.9885	tetramerous	0.5944 (0.0014-1.0000)	*		Lamiidae	pentamerous	pentamerous	1	tetramerous	0.8748 (0.587-1.000)	*		Lamiidae
332_B. Androecium structural merism (3-state) (D2c)	Lamiidae	pentamerous	tetramerous	0.9937	tetramerous	0.5688 (0.0003-1.0000)	*		Lamiidae	pentamerous	pentamerous	0.9999	pentamerous	1 (1-1)	***		Lamiidae	pentamerous	pentamerous	0.9999	pentamerous	0.5853 (0-1)	*		Lamiidae	pentamerous	tetramerous	0.981	pentamerous	0.9995 (0.996-1.000)	*		Lamiidae	pentamerous	pentamerous	0.9999	pentamerous	1 (1-1)	***		Lamiidae	pentamerous	tetramerous	0.9919	pentamerous	0.9996 (0.9969-1.0000)	*		Lamiidae
305_A. Filament (binary) (D2d)	Lamiidae	typical (narrow)	typical (narrow)	0.998	typical (narrow)	0.9805 (0.8686-1.0000)	**		Lamiidae	typical (narrow)	typical (narrow)	0.9973	typical (narrow)	0.9717 (0.8147-1.0000)	**		Lamiidae	typical (narrow)	typical (narrow)	0.9985	typical (narrow)	0.972 (0.8304-1.0000)	**		Lamiidae	typical (narrow)	typical (narrow)	0.997	typical (narrow)	0.9734 (0.8213-1.0000)	**		Lamiidae	typical (narrow)	typical (narrow)	0.9971	typical (narrow)	0.9725 (0.816-1.000)	**		Lamiidae	typical (narrow)	typical (narrow)	0.9992	typical (narrow)	0.991 (0.9527-0.9999)	***		Lamiidae
311_A. Anther orientation (D2d)	Lamiidae	introrse	introrse	0.9997	introrse	0.9948 (0.9882-0.9992)	***		Lamiidae	introrse	introrse	0.9998	introrse	0.9953 (0.9898-1.0000)	***		Lamiidae	introrse	introrse	0.9998	introrse	0.9947 (0.9881-1.0000)	***		Lamiidae	introrse	introrse	0.9997	introrse	0.9951 (0.9870-0.9995)	***		Lamiidae	introrse	introrse	0.9997	introrse	0.9947 (0.9885-1.0000)	***		Lamiidae	introrse	introrse	0.9998	introrse	0.995 (0.9887-0.9994)	***		Lamiidae
312_A. Anther attachment (binary) (D2d)	Lamiidae	basifixed	dorsifixed	0.7175	basifixed	0.929 (0.8878-0.9655)	*		Lamiidae	basifixed	dorsifixed	0.7032	basifixed	0.9363 (0.8972-0.9708)	*		Lamiidae	basifixed	dorsifixed	0.6781	basifixed	0.9289 (0.8799-0.9734)	*		Lamiidae	basifixed	dorsifixed	0.5707	basifixed	0.9287 (0.8915-0.9646)	*		Lamiidae	basifixed	basifixed	0.5045	basifixed	0.923 (0.8757-0.9636)	**		Lamiidae	basifixed	dorsifixed	0.7834	basifixed	0.9175 (0.8694-0.9666)	*		Lamiidae
313_A. Anther dehiscence (3-state) (D2d)	Lamiidae	longitudinal slit	longitudinal slit	1	longitudinal slit	0.9883 (0.9198-1.0000)	**		Lamiidae	longitudinal slit	longitudinal slit	1	longitudinal slit	0.9882 (0.9222-1.0000)	**		Lamiidae	longitudinal slit	longitudinal slit	1	longitudinal slit	0.9818 (0.9041-1.0000)	**		Lamiidae	longitudinal slit	longitudinal slit	1	longitudinal slit	0.9722 (0.8926-1.0000)	**		Lamiidae	longitudinal slit	longitudinal slit	1	longitudinal slit	0.9907 (0.9264-1.0000)	**		Lamiidae	longitudinal slit	longitudinal slit	1	longitudinal slit	0.9898 (0.9316-1.0000)	**		Lamiidae
401_B. Number of structural carpels (5-state) (D2c)	Lamiidae	two (2)	two (2)	0.9986	two (2)	0.9953 (0.9907-0.9991)	***		Lamiidae	two (2)	two (2)	0.9966	two (2)	0.9928 (0.9813-0.9995)	***		Lamiidae	two (2)	two (2)	0.9986	two (2)	0.9864 (0.9672-0.9987)	***		Lamiidae	two (2)	two (2)	0.9962	two (2)	0.9939 (0.9858-0.9992)	***		Lamiidae	two (2)	two (2)	0.9968	two (2)	0.9907 (0.9786-0.9990)	***		Lamiidae	two (2)	two (2)	0.9969	two (2)	0.9942 (0.9865-0.9992)	***		Lamiidae
400_A. Gynoecium phyllotaxy (D2d)	Lamiidae	whorled	whorled	1	whorled	0.9802 (0.9538-1.0000)	***		Lamiidae	whorled	whorled	1	whorled	0.9827 (0.9589-1.0000)	***		Lamiidae	whorled	whorled	1	whorled	0.9796 (0.951-1.000)	***		Lamiidae	whorled	whorled	1	whorled	0.9804 (0.9543-1.0000)	***		Lamiidae	whorled	whorled	1	whorled	0.9806 (0.9542-1.0000)	***		Lamiidae	whorled	whorled	1	whorled	0.9862 (0.9657-1.0000)	***		Lamiidae
403_A. Fusion of ovaries (binary) (D2c)	Lamiidae	fused (>5%)	fused (>5%)	1	fused (>5%)	0.9946 (0.9841-1.0000)	***		Lamiidae	fused (>5%)	fused (>5%)	1	fused (>5%)	0.9961 (0.9867-1.0000)	***		Lamiidae	fused (>5%)	fused (>5%)	1	fused (>5%)	0.995 (0.9837-1.0000)	***		Lamiidae	fused (>5%)	fused (>5%)	1	fused (>5%)	0.9957 (0.9857-1.0000)	***		Lamiidae	fused (>5%)	fused (>5%)	1	fused (>5%)	0.9951 (0.9839-1.0000)	***		Lamiidae	fused (>5%)	fused (>5%)	1	fused (>5%)	0.998 (0.9899-1.0000)	***		Lamiidae
411_A. Number of ovules per functional carpel (3-state) (D2c)	Lamiidae	two (2) / three or more (>2)	three or more (>2)	0.9999	three or more (>2)	0.9839 (0.8804-1.0000)	*		Lamiidae	one (1) / two (2) / three or more (>2)	three or more (>2)	1	three or more (>2)	0.9673 (0.8691-1.0000)	*		Lamiidae	one (1) / two (2) / three or more (>2)	three or more (>2)	0.9999	three or more (>2)	0.978 (0.9023-1.0000)	*		Lamiidae	one (1) / two (2) / three or more (>2)	three or more (>2)	1	three or more (>2)	0.9468 (0.8487-1.0000)	*		Lamiidae	one (1) / two (2) / three or more (>2)	three or more (>2)	1	three or more (>2)	0.9596 (0.8815-1.0000)	*		Lamiidae	two (2) / three or more (>2)	three or more (>2)	0.9999	three or more (>2)	0.9807 (0.8663-1.0000)	*		Lamiidae
100_A. Functional sex of flowers (D2d)	Campanulidae	bisexual	bisexual	0.9997	bisexual	0.9313 (0.6512-1.0000)	**		Campanulidae	bisexual	bisexual	0.9997	bisexual	0.9499 (0.6884-1.0000)	**		Campanulidae	bisexual	bisexual	0.9993	bisexual	0.8574 (0.5815-1.0000)	**		Campanulidae	bisexual	bisexual	0.9992	bisexual	0.8367 (0.6065-1.0000)	**		Campanulidae	bisexual	bisexual	0.9996	bisexual	0.9427 (0.6154-1.0000)	**		Campanulidae	bisexual	bisexual	0.9996	bisexual	0.9286 (0.5821-1.0000)	**		Campanulidae
100_B. Structural sex of flowers (D2d)	Campanulidae	bisexual	bisexual	1	bisexual	0.9997 (0.9992-1.0000)	***		Campanulidae	bisexual	bisexual	1	bisexual	0.9996 (0.9989-0.9999)	***		Campanulidae	bisexual	bisexual	1	bisexual	0.9995 (0.999-1.000)	***		Campanulidae	bisexual	bisexual	1	bisexual	0.9996 (0.9990-0.9999)	***		Campanulidae	bisexual	bisexual	1	bisexual	0.9998 (0.9994-1.0000)	***		Campanulidae	bisexual	bisexual	1	bisexual	0.9995 (0.999-1.000)	***		Campanulidae
102_B. Ovary position (binary) (D2d)	Campanulidae	superior	superior	0.7609	inferior	0.8808 (0.7859-0.9452)	*		Campanulidae	superior	superior	0.8158	inferior	0.8527 (0.7410-0.9442)	*		Campanulidae	superior	superior	0.8204	inferior	0.8705 (0.8003-0.9420)	*		Campanulidae	superior	superior	0.8397	inferior	0.8948 (0.8208-0.9695)	*		Campanulidae	superior	superior	0.8484	superior	0.5735 (0.0846-0.8125)	*		Campanulidae	superior	superior	0.781	inferior	0.8147 (0.6609-0.9321)	*		Campanulidae
201_A. Perianth presence (D2c)	Campanulidae	present	present	1	present	1 (0.9999-1.0000)	***		Campanulidae	present	present	1	present	1 (0.9999-1.0000)	***		Campanulidae	present	present	1	present	1 (0.9999-1.0000)	***		Campanulidae	present	present	1	present	1 (0.9999-1.0000)	***		Campanulidae	present	present	1	present	1 (0.9999-1.0000)	***		Campanulidae	present	present	1	present	1 (0.9999-1.0000)	***		Campanulidae
201_B. Number of perianth parts (3-state) (D2c)	Campanulidae	six to ten (6-10)	six to ten (6-10)	0.9999	six to ten (6-10)	0.9821 (0.9456-0.9999)	**		Campanulidae	six to ten (6-10)	six to ten (6-10)	1	six to ten (6-10)	0.9881 (0.9592-0.9998)	***		Campanulidae	six to ten (6-10)	six to ten (6-10)	0.9999	six to ten (6-10)	0.8635 (0.4957-0.9997)	*		Campanulidae	six to ten (6-10)	six to ten (6-10)	1	six to ten (6-10)	0.9806 (0.9336-0.9998)	**		Campanulidae	six to ten (6-10)	six to ten (6-10)	1	six to ten (6-10)	0.9826 (0.9403-0.9999)	**		Campanulidae	six to ten (6-10)	six to ten (6-10)	0.9999	six to ten (6-10)	0.987 (0.9546-0.9999)	***		Campanulidae
201_C. Number of perianth parts (binary) (D2c)	Campanulidae	more than six (>6)	more than six (>6)	1	more than six (>6)	1 (1-1)	***		Campanulidae	more than six (>6)	more than six (>6)	1	more than six (>6)	0.9998 (0.9989-1.0000)	***		Campanulidae	more than six (>6)	more than six (>6)	1	more than six (>6)	0.9998 (0.999-1.000)	***		Campanulidae	more than six (>6)	more than six (>6)	1	more than six (>6)	0.9999 (0.9991-1.0000)	***		Campanulidae	more than six (>6)	more than six (>6)	1	more than six (>6)	0.9997 (0.9988-1.0000)	***		Campanulidae	more than six (>6)	more than six (>6)	1	more than six (>6)	1 (1-1)	***		Campanulidae
230_A. Perianth phyllotaxy (binary) (D2d)	Campanulidae	whorled	whorled	1	whorled	0.9949 (0.9673-1.0000)	***		Campanulidae	whorled	whorled	0.8816	whorled	0.9934 (0.9647-1.0000)	***		Campanulidae	whorled	whorled	1	whorled	0.9952 (0.9662-1.0000)	***		Campanulidae	whorled	whorled	1	whorled	0.9933 (0.9605-1.0000)	***		Campanulidae	whorled	whorled	1	whorled	0.9947 (0.9686-1.0000)	***		Campanulidae	whorled	whorled	1	whorled	0.9965 (0.9743-1.0000)	***		Campanulidae
231_A. Number of perianth whorls (D2c)	Campanulidae	two (2)	two (2)	1	two (2)	0.9968 (0.9879-0.9999)	***		Campanulidae	two (2)	two (2)	1	two (2)	0.9968 (0.9879-0.9999)	***		Campanulidae	two (2)	two (2)	1	two (2)	0.9966 (0.9884-0.9999)	***		Campanulidae	two (2)	two (2)	1	two (2)	0.9964 (0.9876-0.9999)	***		Campanulidae	two (2)	two (2)	1	two (2)	0.9956 (0.9854-0.9999)	***		Campanulidae	two (2)	two (2)	1	two (2)	0.9959 (0.985-1.000)	***		Campanulidae
232_A. Perianth merism (4-state) (D2c)	Campanulidae	pentamerous	pentamerous	1	pentamerous	0.9979 (0.9952-0.9998)	***		Campanulidae	pentamerous	pentamerous	1	pentamerous	0.9972 (0.9939-0.9998)	***		Campanulidae	pentamerous	pentamerous	1	pentamerous	0.998 (0.9953-0.9999)	***		Campanulidae	pentamerous	pentamerous	1	pentamerous	0.9975 (0.9944-0.9997)	***		Campanulidae	pentamerous	pentamerous	1	pentamerous	0.9976 (0.9955-0.9998)	***		Campanulidae	pentamerous	pentamerous	1	pentamerous	0.9968 (0.9936-0.9996)	***		Campanulidae
232_B. Perianth merism (3-state) (D2c)	Campanulidae	pentamerous	pentamerous	1	pentamerous	0.9985 (0.9965-0.9998)	***		Campanulidae	pentamerous	pentamerous	1	pentamerous	0.998 (0.9959-1.0000)	***		Campanulidae	pentamerous	pentamerous	1	pentamerous	0.9984 (0.9967-0.9998)	***		Campanulidae	pentamerous	pentamerous	1	pentamerous	0.9982 (0.9962-0.9998)	***		Campanulidae	pentamerous	pentamerous	1	pentamerous	0.9988 (0.9974-0.9999)	***		Campanulidae	pentamerous	pentamerous	1	pentamerous	0.998 (0.9960-0.9998)	***		Campanulidae
234_A. Perianth differentiation (binary) (D2d)	Campanulidae	differentiated	differentiated	1	differentiated	0.9977 (0.9937-1.0000)	***		Campanulidae	differentiated	differentiated	1	differentiated	0.8878 (0.0000-0.9996)	*		Campanulidae	differentiated	differentiated	1	differentiated	0.9967 (0.9915-0.9999)	***		Campanulidae	differentiated	differentiated	1	differentiated	0.9967 (0.9915-0.9998)	***		Campanulidae	differentiated	differentiated	1	differentiated	0.9978 (0.9938-1.0000)	***		Campanulidae	differentiated	differentiated	1	differentiated	0.9971 (0.9922-0.9999)	***		Campanulidae
204_A. Fusion of perianth (D2c)	Campanulidae	fused (>5%)	fused (>5%)	0.9755	fused (>5%)	0.9749 (0.9498-0.9947)	**		Campanulidae	fused (>5%)	fused (>5%)	0.9546	fused (>5%)	0.9841 (0.9653-0.9969)	***		Campanulidae	fused (>5%)	fused (>5%)	0.94	fused (>5%)	0.9741 (0.9473-0.9951)	**		Campanulidae	fused (>5%)	fused (>5%)	0.923	fused (>5%)	0.9676 (0.9451-0.9899)	**		Campanulidae	fused (>5%)	fused (>5%)	0.9276	fused (>5%)	0.9747 (0.952-0.996)	***		Campanulidae	fused (>5%)	fused (>5%)	0.9765	fused (>5%)	0.9778 (0.9577-0.9940)	***		Campanulidae
207_A. Symmetry of perianth (binary) (D2d)	Campanulidae	actinomorphic	actinomorphic	1	actinomorphic	0.9781 (0.9075-1.0000)	**		Campanulidae	actinomorphic	actinomorphic	1	actinomorphic	0.9861 (0.9449-1.0000)	**		Campanulidae	actinomorphic	actinomorphic	0.9999	actinomorphic	0.9901 (0.9589-1.0000)	***		Campanulidae	actinomorphic	actinomorphic	1	actinomorphic	0.9855 (0.9422-1.0000)	**		Campanulidae	actinomorphic	actinomorphic	1	actinomorphic	0.9931 (0.9713-1.0000)	***		Campanulidae	actinomorphic	actinomorphic	1	actinomorphic	0.9789 (0.917-1.000)	**		Campanulidae
301_B. Number of fertile stamens (3-state) (D2c)	Campanulidae	one to five (1-5)	one to five (1-5)	0.9977	one to five (1-5)	0.9957 (0.9896-0.9993)	***		Campanulidae	one to five (1-5)	one to five (1-5)	0.9968	one to five (1-5)	0.9892 (0.9750-0.9989)	***		Campanulidae	one to five (1-5)	one to five (1-5)	0.9957	one to five (1-5)	0.9876 (0.9678-0.9990)	***		Campanulidae	one to five (1-5)	one to five (1-5)	0.9966	one to five (1-5)	0.9804 (0.9501-0.9987)	***		Campanulidae	one to five (1-5)	one to five (1-5)	0.9964	one to five (1-5)	0.9899 (0.9732-0.9992)	***		Campanulidae	one to five (1-5)	one to five (1-5)	0.9967	one to five (1-5)	0.9959 (0.992-0.999)	***		Campanulidae
301_C. Number of fertile stamens (binary) (D2c)	Campanulidae	one to six (1-6)	one to six (1-6)	0.9954	one to six (1-6)	0.9964 (0.9912-0.9993)	***		Campanulidae	one to six (1-6)	one to six (1-6)	0.9944	one to six (1-6)	0.9933 (0.987-0.999)	***		Campanulidae	one to six (1-6)	one to six (1-6)	0.9926	one to six (1-6)	0.9948 (0.9889-0.9991)	***		Campanulidae	one to six (1-6)	one to six (1-6)	0.9937	one to six (1-6)	0.9946 (0.9880-0.9989)	***		Campanulidae	one to six (1-6)	one to six (1-6)	0.9937	one to six (1-6)	0.9956 (0.9901-0.9995)	***		Campanulidae	one to six (1-6)	one to six (1-6)	0.9934	one to six (1-6)	0.9973 (0.9936-0.9994)	***		Campanulidae
330_A. Androecium structural phyllotaxy (binary) (D2d)	Campanulidae	whorled	whorled	1	whorled	0.9993 (0.9968-1.0000)	***		Campanulidae	whorled	whorled	1	whorled	0.9993 (0.9988-1.0000)	***		Campanulidae	whorled	whorled	1	whorled	0.9991 (0.997-1.000)	***		Campanulidae	whorled	whorled	1	whorled	0.999 (0.9944-1.0000)	***		Campanulidae	whorled	whorled	1	whorled	0.999 (0.9939-1.0000)	***		Campanulidae	whorled	whorled	1	whorled	0.9997 (0.9999-1.0000)	***		Campanulidae
331_A. Number of androecium structural whorls (3-state) (D2c)	Campanulidae	one (1)	one (1)	0.9937	one (1)	0.9939 (0.9857-0.9993)	***		Campanulidae	one (1)	one (1)	0.9924	one (1)	0.9311 (0.4985-0.9984)	*		Campanulidae	one (1)	one (1)	0.9916	one (1)	0.992 (0.9830-0.9994)	***		Campanulidae	one (1)	one (1)	0.9917	one (1)	0.9929 (0.9846-0.9988)	***		Campanulidae	one (1)	one (1)	0.9927	one (1)	0.9928 (0.9849-0.9988)	***		Campanulidae	one (1)	one (1)	0.9904	one (1)	0.9444 (0.7862-0.9998)	**		Campanulidae
332_A. Androecium structural merism (4-state) (D2c)	Campanulidae	pentamerous	pentamerous	1	tetramerous	0.5829 (0.0005-1.0000)	*		Campanulidae	pentamerous	pentamerous	1	pentamerous	0.593 (0.0000-0.9989)	*		Campanulidae	pentamerous	pentamerous	1	pentamerous	0.708 (0.0000-0.9998)	*		Campanulidae	pentamerous	pentamerous	0.792	pentamerous	0.5174 (0.0000-0.9993)	*		Campanulidae	pentamerous	pentamerous	0.9991	pentamerous	0.6204 (0.0000-0.9992)	*		Campanulidae	pentamerous	pentamerous	1	tetramerous	0.6202 (0.1894-1.0000)	*		Campanulidae
332_B. Androecium structural merism (3-state) (D2c)	Campanulidae	pentamerous	tetramerous	0.9697	pentamerous	0.5293 (0.0000-0.9996)	*		Campanulidae	pentamerous	pentamerous	1	pentamerous	1 (1-1)	***		Campanulidae	pentamerous	pentamerous	1	pentamerous	0.7086 (0-1)	*		Campanulidae	pentamerous	tetramerous	0.9402	pentamerous	0.9993 (0.9943-1.0000)	*		Campanulidae	pentamerous	pentamerous	1	pentamerous	1 (1-1)	***		Campanulidae	pentamerous	tetramerous	0.9624	pentamerous	0.9995 (0.996-1.000)	*		Campanulidae
305_A. Filament (binary) (D2d)	Campanulidae	typical (narrow)	typical (narrow)	0.9961	typical (narrow)	0.9272 (0.6814-0.9966)	**		Campanulidae	typical (narrow)	typical (narrow)	0.9954	typical (narrow)	0.9204 (0.6359-0.9959)	**		Campanulidae	typical (narrow)	typical (narrow)	0.9952	typical (narrow)	0.8977 (0.5857-0.9998)	**		Campanulidae	typical (narrow)	typical (narrow)	0.9961	typical (narrow)	0.9413 (0.7053-0.9996)	**		Campanulidae	typical (narrow)	typical (narrow)	0.9945	typical (narrow)	0.9103 (0.5987-0.9999)	**		Campanulidae	typical (narrow)	typical (narrow)	0.996	typical (narrow)	0.9213 (0.6866-0.9936)	**		Campanulidae
311_A. Anther orientation (D2d)	Campanulidae	introrse	introrse	1	introrse	0.9986 (0.9964-1.0000)	***		Campanulidae	introrse	introrse	1	introrse	0.9983 (0.9958-1.0000)	***		Campanulidae	introrse	introrse	1	introrse	0.9979 (0.9946-1.0000)	***		Campanulidae	introrse	introrse	1	introrse	0.9973 (0.9941-0.9996)	***		Campanulidae	introrse	introrse	1	introrse	0.9983 (0.9958-1.0000)	***		Campanulidae	introrse	introrse	1	introrse	0.9978 (0.9948-0.9999)	***		Campanulidae
312_A. Anther attachment (binary) (D2d)	Campanulidae	dorsifixed	dorsifixed	0.9855	dorsifixed	0.976 (0.9458-0.9964)	**		Campanulidae	basifixed / dorsifixed	dorsifixed	0.9752	dorsifixed	0.9605 (0.9134-0.9934)	*		Campanulidae	basifixed / dorsifixed	dorsifixed	0.9702	dorsifixed	0.944 (0.8800-0.9972)	*		Campanulidae	basifixed / dorsifixed	dorsifixed	0.9576	dorsifixed	0.9602 (0.9212-0.9913)	*		Campanulidae	basifixed / dorsifixed	dorsifixed	0.9267	dorsifixed	0.9462 (0.8975-0.9930)	*		Campanulidae	dorsifixed	dorsifixed	0.9902	dorsifixed	0.9753 (0.9454-0.9969)	**		Campanulidae
313_A. Anther dehiscence (3-state) (D2d)	Campanulidae	longitudinal slit	longitudinal slit	1	longitudinal slit	0.9901 (0.9306-1.0000)	**		Campanulidae	longitudinal slit	longitudinal slit	1	longitudinal slit	0.9894 (0.9293-1.0000)	**		Campanulidae	longitudinal slit	longitudinal slit	1	longitudinal slit	0.9834 (0.9094-1.0000)	**		Campanulidae	longitudinal slit	longitudinal slit	1	longitudinal slit	0.9718 (0.8881-1.0000)	**		Campanulidae	longitudinal slit	longitudinal slit	1	longitudinal slit	0.9927 (0.9409-1.0000)	**		Campanulidae	longitudinal slit	longitudinal slit	1	longitudinal slit	0.99 (0.9326-1.0000)	**		Campanulidae
401_B. Number of structural carpels (5-state) (D2c)	Campanulidae	two (2)	two (2)	0.9834	two (2)	0.7424 (0.2387-0.9997)	*		Campanulidae	two (2)	two (2)	0.9374	two (2)	0.9148 (0.6465-0.9995)	**		Campanulidae	two (2)	two (2)	0.9833	two (2)	0.8695 (0.3756-0.9996)	*		Campanulidae	two (2)	two (2)	0.9351	two (2)	0.8667 (0.4844-0.9996)	*		Campanulidae	two (2)	two (2)	0.9551	two (2)	0.8331 (0.3936-0.9997)	*		Campanulidae	two (2)	two (2)	0.9614	two (2)	0.8674 (0.4311-0.9998)	*		Campanulidae
400_A. Gynoecium phyllotaxy (D2d)	Campanulidae	whorled	whorled	1	whorled	0.9573 (0.9108-1.0000)	**		Campanulidae	whorled	whorled	1	whorled	0.9549 (0.904-1.000)	**		Campanulidae	whorled	whorled	1	whorled	0.9504 (0.9014-1.0000)	**		Campanulidae	whorled	whorled	1	whorled	0.9495 (0.898-1.000)	**		Campanulidae	whorled	whorled	1	whorled	0.9638 (0.9169-1.0000)	**		Campanulidae	whorled	whorled	1	whorled	0.9595 (0.912-1.000)	**		Campanulidae
403_A. Fusion of ovaries (binary) (D2c)	Campanulidae	fused (>5%)	fused (>5%)	1	fused (>5%)	0.9965 (0.9887-1.0000)	***		Campanulidae	fused (>5%)	fused (>5%)	1	fused (>5%)	0.9975 (0.9904-1.0000)	***		Campanulidae	fused (>5%)	fused (>5%)	1	fused (>5%)	0.996 (0.9871-1.0000)	***		Campanulidae	fused (>5%)	fused (>5%)	1	fused (>5%)	0.9967 (0.9882-1.0000)	***		Campanulidae	fused (>5%)	fused (>5%)	1	fused (>5%)	0.9976 (0.9908-1.0000)	***		Campanulidae	fused (>5%)	fused (>5%)	1	fused (>5%)	0.9986 (0.9923-1.0000)	***		Campanulidae
411_A. Number of ovules per functional carpel (3-state) (D2c)	Campanulidae	one (1)	three or more (>2)	0.9973	three or more (>2)	0.9707 (0.8047-1.0000)	*		Campanulidae	one (1)	three or more (>2)	0.9986	three or more (>2)	0.9411 (0.7585-1.0000)	*		Campanulidae	one (1)	three or more (>2)	0.9978	three or more (>2)	0.9561 (0.8232-1.0000)	*		Campanulidae	one (1)	three or more (>2)	0.9988	three or more (>2)	0.8988 (0.7904-1.0000)	*		Campanulidae	one (1)	three or more (>2)	0.9983	three or more (>2)	0.9272 (0.8398-1.0000)	*		Campanulidae	one (1)	three or more (>2)	0.9948	three or more (>2)	0.9591 (0.7348-1.0000)	*		Campanulidae
100_A. Functional sex of flowers (D2d)	Superrosidae	bisexual	bisexual	1	bisexual	0.9999 (0.9995-1.0000)	***		Superrosidae	bisexual	bisexual	1	bisexual	0.9999 (0.9997-1.0000)	***		Superrosidae	bisexual	bisexual	1	bisexual	0.9998 (0.9995-1.0000)	***		Superrosidae	bisexual	bisexual	1	bisexual	0.9998 (0.9995-1.0000)	***		Superrosidae	bisexual	bisexual	1	bisexual	0.9999 (0.9994-1.0000)	***		Superrosidae	bisexual	bisexual	1	bisexual	0.9998 (0.9987-1.0000)	***		Superrosidae
100_B. Structural sex of flowers (D2d)	Superrosidae	bisexual	bisexual	1	bisexual	1 (0.9999-1.0000)	***		Superrosidae	bisexual	bisexual	1	bisexual	1 (0.9999-1.0000)	***		Superrosidae	bisexual	bisexual	1	bisexual	1 (0.9999-1.0000)	***		Superrosidae	bisexual	bisexual	1	bisexual	1 (0.9999-1.0000)	***		Superrosidae	bisexual	bisexual	1	bisexual	0.9999 (0.9999-1.0000)	***		Superrosidae	bisexual	bisexual	1	bisexual	0.9999 (0.9997-1.0000)	***		Superrosidae
102_B. Ovary position (binary) (D2d)	Superrosidae	superior / inferior	superior	0.997	superior	0.8816 (0.8114-0.9560)	*		Superrosidae	superior	superior	0.9923	superior	0.7874 (0.4970-0.9688)	*		Superrosidae	superior	superior	0.9776	superior	0.8694 (0.6374-0.9653)	**		Superrosidae	superior	superior	0.9877	superior	0.8175 (0.5749-0.9638)	**		Superrosidae	superior / inferior	superior	0.9952	superior	0.8039 (0.6309-0.9468)	*		Superrosidae	superior / inferior	superior	0.9917	superior	0.852 (0.7483-0.9419)	*		Superrosidae
201_A. Perianth presence (D2c)	Superrosidae	present	present	1	present	0.9999 (1-1)	***		Superrosidae	present	present	1	present	1 (1-1)	***		Superrosidae	present	present	1	present	1 (1-1)	***		Superrosidae	present	present	1	present	1 (1-1)	***		Superrosidae	present	present	1	present	1 (1-1)	***		Superrosidae	present	present	1	present	1 (1-1)	***		Superrosidae
201_B. Number of perianth parts (3-state) (D2c)	Superrosidae	six to ten (6-10)	six to ten (6-10)	0.9991	six to ten (6-10)	0.9404 (0.5184-1.0000)	**		Superrosidae	six to ten (6-10)	six to ten (6-10)	0.9992	six to ten (6-10)	0.968 (0.8841-0.9999)	**		Superrosidae	six to ten (6-10)	six to ten (6-10)	0.9991	six to ten (6-10)	0.8592 (0.4997-0.9999)	*		Superrosidae	six to ten (6-10)	six to ten (6-10)	0.9992	six to ten (6-10)	0.8519 (0.0676-1.0000)	*		Superrosidae	six to ten (6-10)	six to ten (6-10)	0.999	six to ten (6-10)	0.9199 (0.2217-0.9999)	*		Superrosidae	six to ten (6-10)	six to ten (6-10)	0.9981	six to ten (6-10)	0.9615 (0.8155-0.9999)	**		Superrosidae
201_C. Number of perianth parts (binary) (D2c)	Superrosidae	more than six (>6)	more than six (>6)	1	more than six (>6)	1 (1-1)	***		Superrosidae	more than six (>6)	more than six (>6)	1	more than six (>6)	1 (0.9997-1.0000)	***		Superrosidae	more than six (>6)	more than six (>6)	1	more than six (>6)	0.9999 (0.9997-1.0000)	***		Superrosidae	more than six (>6)	more than six (>6)	1	more than six (>6)	1 (0.9997-1.0000)	***		Superrosidae	more than six (>6)	more than six (>6)	1	more than six (>6)	0.9998 (0.9996-1.0000)	***		Superrosidae	more than six (>6)	more than six (>6)	1	more than six (>6)	1 (1-1)	***		Superrosidae
230_A. Perianth phyllotaxy (binary) (D2d)	Superrosidae	whorled	whorled	0.9941	whorled	0.9954 (0.9711-1.0000)	***		Superrosidae	whorled	spiral	1	whorled	0.9941 (0.9677-1.0000)	*		Superrosidae	whorled	whorled	0.9919	whorled	0.9968 (0.9796-1.0000)	***		Superrosidae	whorled	whorled	0.9887	whorled	0.995 (0.9701-1.0000)	***		Superrosidae	whorled	whorled	0.9916	whorled	0.9942 (0.9666-1.0000)	***		Superrosidae	whorled	whorled	0.9943	whorled	0.9964 (0.9756-1.0000)	***		Superrosidae
231_A. Number of perianth whorls (D2c)	Superrosidae	two (2)	two (2)	1	two (2)	0.9994 (0.9979-1.0000)	***		Superrosidae	two (2)	two (2)	1	two (2)	0.9993 (0.9978-1.0000)	***		Superrosidae	two (2)	two (2)	1	two (2)	0.9993 (0.9979-1.0000)	***		Superrosidae	two (2)	two (2)	1	two (2)	0.9991 (0.9976-1.0000)	***		Superrosidae	two (2)	two (2)	1	two (2)	0.9987 (0.9968-1.0000)	***		Superrosidae	two (2)	two (2)	0.9999	two (2)	0.9984 (0.9943-1.0000)	***		Superrosidae
232_A. Perianth merism (4-state) (D2c)	Superrosidae	pentamerous	pentamerous	1	pentamerous	0.9998 (0.9995-1.0000)	***		Superrosidae	pentamerous	pentamerous	1	pentamerous	0.9998 (0.9995-1.0000)	***		Superrosidae	pentamerous	pentamerous	1	pentamerous	0.9999 (0.9997-1.0000)	***		Superrosidae	pentamerous	pentamerous	1	pentamerous	0.9999 (0.9997-1.0000)	***		Superrosidae	pentamerous	pentamerous	1	pentamerous	0.9997 (0.9994-1.0000)	***		Superrosidae	pentamerous	pentamerous	1	pentamerous	0.9994 (0.9986-1.0000)	***		Superrosidae
232_B. Perianth merism (3-state) (D2c)	Superrosidae	pentamerous	pentamerous	1	pentamerous	0.9999 (0.9998-1.0000)	***		Superrosidae	pentamerous	pentamerous	1	pentamerous	0.9999 (0.9998-1.0000)	***		Superrosidae	pentamerous	pentamerous	1	pentamerous	0.9999 (0.9998-1.0000)	***		Superrosidae	pentamerous	pentamerous	1	pentamerous	0.9999 (0.9998-1.0000)	***		Superrosidae	pentamerous	pentamerous	1	pentamerous	0.9999 (0.9997-1.0000)	***		Superrosidae	pentamerous	pentamerous	1	pentamerous	0.9997 (0.9994-1.0000)	***		Superrosidae
234_A. Perianth differentiation (binary) (D2d)	Superrosidae	differentiated	differentiated	0.9938	differentiated	0.9955 (0.9931-1.0000)	***		Superrosidae	differentiated	differentiated	0.9908	differentiated	0.8715 (0.0000-0.9999)	*		Superrosidae	differentiated	differentiated	0.9921	differentiated	0.9833 (0.9644-1.0000)	***		Superrosidae	differentiated	differentiated	0.9917	differentiated	0.9869 (0.9756-1.0000)	***		Superrosidae	differentiated	differentiated	0.9913	differentiated	0.9867 (0.9731-1.0000)	***		Superrosidae	differentiated	differentiated	0.9908	differentiated	0.9969 (0.9918-1.0000)	***		Superrosidae
204_A. Fusion of perianth (D2c)	Superrosidae	free (<5%)	free (<5%)	0.9975	free (<5%)	0.9755 (0.9632-0.9880)	***		Superrosidae	free (<5%)	free (<5%)	0.9994	free (<5%)	0.9645 (0.9451-0.9826)	**		Superrosidae	free (<5%) / fused (>5%)	free (<5%)	0.9995	free (<5%)	0.9728 (0.9600-0.9869)	**		Superrosidae	free (<5%)	free (<5%)	0.9994	free (<5%)	0.9674 (0.9558-0.9789)	***		Superrosidae	free (<5%)	free (<5%)	0.9994	free (<5%)	0.9681 (0.9467-0.9840)	**		Superrosidae	free (<5%)	free (<5%)	0.9949	free (<5%)	0.9604 (0.9267-0.9854)	**		Superrosidae
207_A. Symmetry of perianth (binary) (D2d)	Superrosidae	actinomorphic	actinomorphic	1	actinomorphic	0.995 (0.988-1.000)	***		Superrosidae	actinomorphic	actinomorphic	1	actinomorphic	0.9969 (0.9947-1.0000)	***		Superrosidae	actinomorphic	actinomorphic	1	actinomorphic	0.9986 (0.9961-1.0000)	***		Superrosidae	actinomorphic	actinomorphic	1	actinomorphic	0.9979 (0.9966-1.0000)	***		Superrosidae	actinomorphic	actinomorphic	1	actinomorphic	0.9988 (0.9958-1.0000)	***		Superrosidae	actinomorphic	actinomorphic	1	actinomorphic	0.9893 (0.9655-1.0000)	***		Superrosidae
301_B. Number of fertile stamens (3-state) (D2c)	Superrosidae	six to ten (6-10)	more than ten (>10)	1	more than ten (>10)	0.9233 (0.006-1.000)	*		Superrosidae	six to ten (6-10)	more than ten (>10)	1	more than ten (>10)	0.7606 (0.004-1.000)	*		Superrosidae	six to ten (6-10)	more than ten (>10)	1	more than ten (>10)	0.8139 (0.004-1.000)	*		Superrosidae	six to ten (6-10)	more than ten (>10)	1	more than ten (>10)	0.7719 (0.0044-1.0000)	*		Superrosidae	six to ten (6-10)	more than ten (>10)	1	more than ten (>10)	0.5304 (0.0066-1.0000)	*		Superrosidae	six to ten (6-10)	more than ten (>10)	1	more than ten (>10)	0.8059 (0.0072-1.0000)	*		Superrosidae
301_C. Number of fertile stamens (binary) (D2c)	Superrosidae	more than six (>6)	more than six (>6)	1	more than six (>6)	1 (0.9999-1.0000)	***		Superrosidae	more than six (>6)	more than six (>6)	1	more than six (>6)	1 (0.9999-1.0000)	***		Superrosidae	more than six (>6)	more than six (>6)	1	more than six (>6)	1 (0.9999-1.0000)	***		Superrosidae	more than six (>6)	more than six (>6)	1	more than six (>6)	1 (0.9999-1.0000)	***		Superrosidae	more than six (>6)	more than six (>6)	1	more than six (>6)	0.9999 (0.9998-1.0000)	***		Superrosidae	more than six (>6)	more than six (>6)	1	more than six (>6)	1 (0.9999-1.0000)	***		Superrosidae
330_A. Androecium structural phyllotaxy (binary) (D2d)	Superrosidae	whorled	whorled	1	whorled	0.9998 (0.9991-1.0000)	***		Superrosidae	whorled	whorled	0.9996	whorled	0.9998 (0.9997-1.0000)	***		Superrosidae	whorled	whorled	1	whorled	0.9998 (0.9994-1.0000)	***		Superrosidae	whorled	whorled	1	whorled	0.9998 (0.9988-1.0000)	***		Superrosidae	whorled	whorled	0.9996	whorled	0.9997 (0.9974-1.0000)	***		Superrosidae	whorled	whorled	0.9996	whorled	0.9999 (1-1)	***		Superrosidae
331_A. Number of androecium structural whorls (3-state) (D2c)	Superrosidae	one (1)	two (2)	0.9982	two (2)	0.9966 (0.9967-1.0000)	**		Superrosidae	one (1)	two (2)	0.998	two (2)	0.998 (0.9964-1.0000)	**		Superrosidae	one (1)	two (2)	1	two (2)	0.9987 (0.9966-1.0000)	**		Superrosidae	one (1)	two (2)	0.9988	two (2)	0.9988 (0.9968-1.0000)	**		Superrosidae	one (1)	two (2)	1	two (2)	0.9981 (0.9951-1.0000)	**		Superrosidae	one (1)	two (2)	0.9976	two (2)	0.8878 (0.5533-1.0000)	*		Superrosidae
332_A. Androecium structural merism (4-state) (D2c)	Superrosidae	pentamerous	pentamerous	1	tetramerous	0.8488 (0.0001-1.0000)	*		Superrosidae	pentamerous	pentamerous	1	tetramerous	0.8018 (0.0001-1.0000)	*		Superrosidae	pentamerous	pentamerous	0.9999	tetramerous	0.5272 (0-1)	*		Superrosidae	pentamerous	tetramerous	0.7825	tetramerous	0.8534 (0-1)	*		Superrosidae	pentamerous	pentamerous	0.9908	tetramerous	0.673 (0.0001-1.0000)	*		Superrosidae	pentamerous	pentamerous	1	tetramerous	0.9722 (0.8535-1.0000)	*		Superrosidae
332_B. Androecium structural merism (3-state) (D2c)	Superrosidae	pentamerous	tetramerous	1	tetramerous	0.5894 (0-1)	*		Superrosidae	pentamerous	pentamerous	1	pentamerous	1 (1-1)	***		Superrosidae	pentamerous	pentamerous	1	pentamerous	0.5666 (0-1)	*		Superrosidae	pentamerous	tetramerous	1	pentamerous	0.9999 (0.9995-1.0000)	*		Superrosidae	pentamerous	pentamerous	1	pentamerous	1 (1-1)	***		Superrosidae	pentamerous	tetramerous	1	pentamerous	0.9999 (0.9991-1.0000)	*		Superrosidae
305_A. Filament (binary) (D2d)	Superrosidae	typical (narrow)	typical (narrow)	0.9998	typical (narrow)	0.9968 (0.9854-1.0000)	***		Superrosidae	typical (narrow)	typical (narrow)	0.9994	typical (narrow)	0.9943 (0.9782-1.0000)	***		Superrosidae	typical (narrow)	typical (narrow)	0.9998	typical (narrow)	0.9941 (0.9764-1.0000)	***		Superrosidae	typical (narrow)	typical (narrow)	0.9995	typical (narrow)	0.994 (0.9733-1.0000)	***		Superrosidae	typical (narrow)	typical (narrow)	0.9991	typical (narrow)	0.9923 (0.974-1.000)	***		Superrosidae	typical (narrow)	typical (narrow)	0.9999	typical (narrow)	0.998 (0.9894-1.0000)	***		Superrosidae
311_A. Anther orientation (D2d)	Superrosidae	introrse	introrse	1	introrse	0.9996 (0.9989-1.0000)	***		Superrosidae	introrse	introrse	1	introrse	0.9994 (0.9988-1.0000)	***		Superrosidae	introrse	introrse	1	introrse	0.9993 (0.9989-1.0000)	***		Superrosidae	introrse	introrse	1	introrse	0.9995 (0.999-1.000)	***		Superrosidae	introrse	introrse	1	introrse	0.9994 (0.9986-1.0000)	***		Superrosidae	introrse	introrse	1	introrse	0.9991 (0.9975-1.0000)	***		Superrosidae
312_A. Anther attachment (binary) (D2d)	Superrosidae	basifixed / dorsifixed	dorsifixed	0.921	dorsifixed	0.8677 (0.8143-0.9177)	*		Superrosidae	basifixed	dorsifixed	0.907	dorsifixed	0.85 (0.7846-0.9033)	*		Superrosidae	basifixed	dorsifixed	0.9017	dorsifixed	0.8355 (0.7557-0.9035)	*		Superrosidae	basifixed	dorsifixed	0.895	dorsifixed	0.8454 (0.7967-0.8860)	*		Superrosidae	basifixed	dorsifixed	0.7834	dorsifixed	0.8408 (0.7797-0.9033)	*		Superrosidae	basifixed / dorsifixed	dorsifixed	0.9558	dorsifixed	0.823 (0.7610-0.8873)	*		Superrosidae
313_A. Anther dehiscence (3-state) (D2d)	Superrosidae	longitudinal slit	longitudinal slit	1	longitudinal slit	0.8299 (0-1)	*		Superrosidae	longitudinal slit	longitudinal slit	1	longitudinal slit	0.814 (0-1)	*		Superrosidae	longitudinal slit	longitudinal slit	1	longitudinal slit	0.7302 (0-1)	*		Superrosidae	longitudinal slit	longitudinal slit	1	longitudinal slit	0.5731 (0-1)	*		Superrosidae	longitudinal slit	longitudinal slit	1	longitudinal slit	0.8696 (0-1)	*		Superrosidae	longitudinal slit	longitudinal slit	1	longitudinal slit	0.8314 (0-1)	*		Superrosidae
401_B. Number of structural carpels (5-state) (D2c)	Superrosidae	three (3) / four or five (4-5)	three (3)	0.9999	four or five (4-5)	0.9852 (0.9191-1.0000)	*		Superrosidae	three (3) / four or five (4-5)	four or five (4-5)	0.9999	four or five (4-5)	0.9814 (0.9377-0.9997)	*		Superrosidae	four or five (4-5)	three (3)	0.9999	four or five (4-5)	0.9857 (0.9598-1.0000)	*		Superrosidae	three (3)	four or five (4-5)	0.9999	four or five (4-5)	0.9732 (0.9214-0.9998)	*		Superrosidae	three (3) / four or five (4-5)	four or five (4-5)	0.9999	four or five (4-5)	0.9804 (0.9210-0.9998)	*		Superrosidae	three (3) / four or five (4-5)	four or five (4-5)	0.9995	four or five (4-5)	0.9594 (0.8679-0.9999)	*		Superrosidae
400_A. Gynoecium phyllotaxy (D2d)	Superrosidae	whorled	whorled	0.9766	whorled	0.9202 (0.7535-1.0000)	**		Superrosidae	whorled	whorled	0.9802	whorled	0.9226 (0.7579-1.0000)	**		Superrosidae	whorled	whorled	0.9795	whorled	0.9331 (0.7899-1.0000)	**		Superrosidae	whorled	whorled	0.9829	whorled	0.9259 (0.7703-1.0000)	**		Superrosidae	whorled	whorled	0.9775	whorled	0.8991 (0.686-1.000)	**		Superrosidae	whorled	whorled	0.9668	whorled	0.8897 (0.6511-1.0000)	**		Superrosidae
403_A. Fusion of ovaries (binary) (D2c)	Superrosidae	fused (>5%)	fused (>5%)	0.9995	fused (>5%)	0.983 (0.9807-1.0000)	***		Superrosidae	fused (>5%)	fused (>5%)	0.9997	fused (>5%)	0.9881 (0.9918-1.0000)	***		Superrosidae	fused (>5%)	fused (>5%)	0.9995	fused (>5%)	0.9913 (0.9923-1.0000)	***		Superrosidae	fused (>5%)	fused (>5%)	1	fused (>5%)	0.9925 (0.9916-1.0000)	***		Superrosidae	fused (>5%)	fused (>5%)	0.9992	fused (>5%)	0.988 (0.9913-1.0000)	***		Superrosidae	fused (>5%)	fused (>5%)	0.9994	fused (>5%)	0.998 (0.9952-1.0000)	***		Superrosidae
411_A. Number of ovules per functional carpel (3-state) (D2c)	Superrosidae	two (2) / three or more (>2)	three or more (>2)	1	three or more (>2)	0.9859 (0.9299-1.0000)	*		Superrosidae	two (2) / three or more (>2)	three or more (>2)	1	three or more (>2)	0.9658 (0.8087-1.0000)	*		Superrosidae	two (2) / three or more (>2)	three or more (>2)	1	three or more (>2)	0.9802 (0.8917-1.0000)	*		Superrosidae	two (2)	three or more (>2)	1	three or more (>2)	0.9821 (0.9398-1.0000)	*		Superrosidae	two (2) / three or more (>2)	three or more (>2)	1	three or more (>2)	0.9846 (0.9583-1.0000)	**		Superrosidae	two (2) / three or more (>2)	three or more (>2)	1	three or more (>2)	0.9642 (0.7512-1.0000)	*		Superrosidae
100_A. Functional sex of flowers (D2d)	Rosidae	bisexual	bisexual	1	bisexual	0.9983 (0.9912-1.0000)	***		Rosidae	bisexual	bisexual	1	bisexual	0.9985 (0.9908-1.0000)	***		Rosidae	bisexual	bisexual	1	bisexual	0.9964 (0.9896-1.0000)	***		Rosidae	bisexual	bisexual	1	bisexual	0.9961 (0.9905-1.0000)	***		Rosidae	bisexual	bisexual	1	bisexual	0.9982 (0.9882-1.0000)	***		Rosidae	bisexual	bisexual	1	bisexual	0.9971 (0.984-1.000)	***		Rosidae
100_B. Structural sex of flowers (D2d)	Rosidae	bisexual	bisexual	1	bisexual	0.9992 (0.9986-0.9997)	***		Rosidae	bisexual	bisexual	1	bisexual	0.9992 (0.9985-0.9997)	***		Rosidae	bisexual	bisexual	1	bisexual	0.9993 (0.9987-0.9997)	***		Rosidae	bisexual	bisexual	1	bisexual	0.9992 (0.9987-0.9997)	***		Rosidae	bisexual	bisexual	1	bisexual	0.9988 (0.9979-0.9996)	***		Rosidae	bisexual	bisexual	1	bisexual	0.9983 (0.9967-0.9996)	***		Rosidae
102_B. Ovary position (binary) (D2d)	Rosidae	superior / inferior	superior	0.9972	superior	0.9762 (0.9655-0.9862)	**		Rosidae	superior	superior	0.9925	superior	0.9521 (0.8716-0.9892)	**		Rosidae	superior / inferior	superior	0.9773	superior	0.9541 (0.8692-0.9883)	*		Rosidae	superior / inferior	superior	0.9874	superior	0.9329 (0.8386-0.9839)	*		Rosidae	superior / inferior	superior	0.9951	superior	0.9417 (0.8788-0.9842)	*		Rosidae	superior / inferior	superior	0.9922	superior	0.9617 (0.9405-0.9795)	*		Rosidae
201_A. Perianth presence (D2c)	Rosidae	present	present	1	present	1 (0.9999-1.0000)	***		Rosidae	present	present	1	present	1 (0.9999-1.0000)	***		Rosidae	present	present	1	present	1 (0.9999-1.0000)	***		Rosidae	present	present	1	present	1 (0.9999-1.0000)	***		Rosidae	present	present	1	present	1 (0.9999-1.0000)	***		Rosidae	present	present	1	present	0.9999 (0.9998-1.0000)	***		Rosidae
201_B. Number of perianth parts (3-state) (D2c)	Rosidae	six to ten (6-10)	six to ten (6-10)	0.9993	six to ten (6-10)	0.8785 (0.2636-0.9969)	*		Rosidae	six to ten (6-10)	six to ten (6-10)	0.9994	six to ten (6-10)	0.934 (0.6013-0.9974)	**		Rosidae	six to ten (6-10)	six to ten (6-10)	0.9994	six to ten (6-10)	0.8329 (0.4956-0.9954)	*		Rosidae	six to ten (6-10)	six to ten (6-10)	0.9994	six to ten (6-10)	0.7719 (0.029-0.997)	*		Rosidae	six to ten (6-10)	six to ten (6-10)	0.9993	six to ten (6-10)	0.8672 (0.1140-0.9992)	*		Rosidae	six to ten (6-10)	six to ten (6-10)	0.9985	six to ten (6-10)	0.9124 (0.5533-0.9958)	**		Rosidae
201_C. Number of perianth parts (binary) (D2c)	Rosidae	more than six (>6)	more than six (>6)	1	more than six (>6)	0.9999 (1-1)	***		Rosidae	more than six (>6)	more than six (>6)	1	more than six (>6)	0.999 (0.9934-1.0000)	***		Rosidae	more than six (>6)	more than six (>6)	1	more than six (>6)	0.9988 (0.9931-1.0000)	***		Rosidae	more than six (>6)	more than six (>6)	1	more than six (>6)	0.9989 (0.9937-1.0000)	***		Rosidae	more than six (>6)	more than six (>6)	1	more than six (>6)	0.9968 (0.992-1.000)	***		Rosidae	more than six (>6)	more than six (>6)	1	more than six (>6)	0.9998 (1-1)	***		Rosidae
230_A. Perianth phyllotaxy (binary) (D2d)	Rosidae	whorled	whorled	0.9962	whorled	0.995 (0.9708-1.0000)	***		Rosidae	whorled	spiral	0.7194	whorled	0.9935 (0.9687-1.0000)	*		Rosidae	whorled	whorled	0.9951	whorled	0.9965 (0.9769-1.0000)	***		Rosidae	whorled	whorled	0.9926	whorled	0.9943 (0.9704-1.0000)	***		Rosidae	whorled	whorled	0.9945	whorled	0.9929 (0.9638-1.0000)	***		Rosidae	whorled	whorled	0.9963	whorled	0.9952 (0.9661-1.0000)	***		Rosidae
231_A. Number of perianth whorls (D2c)	Rosidae	two (2)	two (2)	1	two (2)	0.9949 (0.9857-0.9994)	***		Rosidae	two (2)	two (2)	1	two (2)	0.9938 (0.9831-0.9992)	***		Rosidae	two (2)	two (2)	1	two (2)	0.9939 (0.9834-0.9993)	***		Rosidae	two (2)	two (2)	1	two (2)	0.9928 (0.9801-0.9994)	***		Rosidae	two (2)	two (2)	1	two (2)	0.9902 (0.9747-0.9993)	***		Rosidae	two (2)	two (2)	0.9999	two (2)	0.9905 (0.9728-0.9989)	***		Rosidae
232_A. Perianth merism (4-state) (D2c)	Rosidae	pentamerous	pentamerous	1	pentamerous	0.9979 (0.9964-0.9994)	***		Rosidae	pentamerous	pentamerous	1	pentamerous	0.998 (0.9965-0.9994)	***		Rosidae	pentamerous	pentamerous	1	pentamerous	0.9983 (0.9971-0.9995)	***		Rosidae	pentamerous	pentamerous	1	pentamerous	0.9982 (0.9969-0.9994)	***		Rosidae	pentamerous	pentamerous	1	pentamerous	0.9978 (0.9958-0.9998)	***		Rosidae	pentamerous	pentamerous	1	pentamerous	0.9958 (0.9921-0.9990)	***		Rosidae
232_B. Perianth merism (3-state) (D2c)	Rosidae	pentamerous	pentamerous	1	pentamerous	0.9991 (0.9984-0.9996)	***		Rosidae	pentamerous	pentamerous	1	pentamerous	0.9991 (0.9984-1.0000)	***		Rosidae	pentamerous	pentamerous	1	pentamerous	0.9991 (0.9982-0.9997)	***		Rosidae	pentamerous	pentamerous	1	pentamerous	0.9991 (0.9984-0.9996)	***		Rosidae	pentamerous	pentamerous	1	pentamerous	0.9989 (0.9976-0.9996)	***		Rosidae	pentamerous	pentamerous	1	pentamerous	0.998 (0.9962-0.9994)	***		Rosidae
234_A. Perianth differentiation (binary) (D2d)	Rosidae	differentiated	differentiated	0.9961	differentiated	0.9865 (0.9673-0.9994)	***		Rosidae	differentiated	differentiated	0.9944	differentiated	0.858 (0.0000-0.9985)	*		Rosidae	differentiated	differentiated	0.9953	differentiated	0.968 (0.8755-1.0000)	**		Rosidae	differentiated	differentiated	0.9947	differentiated	0.9695 (0.8932-1.0000)	**		Rosidae	differentiated	differentiated	0.9945	differentiated	0.9713 (0.8967-0.9998)	**		Rosidae	differentiated	differentiated	0.9943	differentiated	0.988 (0.9692-0.9989)	***		Rosidae
204_A. Fusion of perianth (D2c)	Rosidae	free (<5%)	free (<5%)	0.9977	free (<5%)	0.9757 (0.9643-0.9858)	***		Rosidae	free (<5%)	free (<5%)	0.9994	free (<5%)	0.9645 (0.9520-0.9778)	***		Rosidae	free (<5%) / fused (>5%)	free (<5%)	0.9995	free (<5%)	0.973 (0.9596-0.9849)	**		Rosidae	free (<5%)	free (<5%)	0.9994	free (<5%)	0.968 (0.9589-0.9771)	***		Rosidae	free (<5%)	free (<5%)	0.9994	free (<5%)	0.9687 (0.9559-0.9808)	***		Rosidae	free (<5%)	free (<5%)	0.9953	free (<5%)	0.9589 (0.9305-0.9780)	**		Rosidae
207_A. Symmetry of perianth (binary) (D2d)	Rosidae	actinomorphic	actinomorphic	1	actinomorphic	0.9759 (0.9181-0.9998)	**		Rosidae	actinomorphic	actinomorphic	1	actinomorphic	0.9857 (0.9609-0.9998)	***		Rosidae	actinomorphic	actinomorphic	1	actinomorphic	0.9909 (0.9690-0.9998)	***		Rosidae	actinomorphic	actinomorphic	1	actinomorphic	0.9874 (0.9630-0.9998)	***		Rosidae	actinomorphic	actinomorphic	1	actinomorphic	0.9913 (0.9716-0.9997)	***		Rosidae	actinomorphic	actinomorphic	0.9999	actinomorphic	0.9608 (0.8596-0.9998)	**		Rosidae
301_B. Number of fertile stamens (3-state) (D2c)	Rosidae	six to ten (6-10)	more than ten (>10)	1	more than ten (>10)	0.9114 (0.0119-0.9995)	*		Rosidae	six to ten (6-10)	more than ten (>10)	0.9999	more than ten (>10)	0.7326 (0.0067-0.9981)	*		Rosidae	six to ten (6-10)	more than ten (>10)	0.9999	more than ten (>10)	0.8019 (0.0081-0.9987)	*		Rosidae	six to ten (6-10)	more than ten (>10)	0.9999	more than ten (>10)	0.7532 (0.0101-0.9980)	*		Rosidae	six to ten (6-10)	more than ten (>10)	0.9999	more than ten (>10)	0.5187 (0.0136-0.9970)	*		Rosidae	six to ten (6-10)	more than ten (>10)	0.9999	more than ten (>10)	0.7948 (0.0120-0.9985)	*		Rosidae
301_C. Number of fertile stamens (binary) (D2c)	Rosidae	more than six (>6)	more than six (>6)	1	more than six (>6)	0.9956 (0.9917-0.9989)	***		Rosidae	more than six (>6)	more than six (>6)	1	more than six (>6)	0.9964 (0.9926-0.9992)	***		Rosidae	more than six (>6)	more than six (>6)	1	more than six (>6)	0.9964 (0.9930-0.9992)	***		Rosidae	more than six (>6)	more than six (>6)	1	more than six (>6)	0.9955 (0.9915-0.9988)	***		Rosidae	more than six (>6)	more than six (>6)	1	more than six (>6)	0.9942 (0.988-0.999)	***		Rosidae	more than six (>6)	more than six (>6)	0.9999	more than six (>6)	0.9953 (0.9903-0.9991)	***		Rosidae
330_A. Androecium structural phyllotaxy (binary) (D2d)	Rosidae	whorled	whorled	1	whorled	0.9991 (0.9934-1.0000)	***		Rosidae	whorled	whorled	0.9998	whorled	0.9991 (0.9964-1.0000)	***		Rosidae	whorled	whorled	1	whorled	0.9992 (0.9948-1.0000)	***		Rosidae	whorled	whorled	1	whorled	0.999 (0.9911-1.0000)	***		Rosidae	whorled	whorled	0.9997	whorled	0.9985 (0.9862-1.0000)	***		Rosidae	whorled	whorled	0.9998	whorled	0.9993 (0.9996-1.0000)	***		Rosidae
331_A. Number of androecium structural whorls (3-state) (D2c)	Rosidae	one (1)	two (2)	0.999	two (2)	0.9914 (0.9842-1.0000)	**		Rosidae	one (1)	two (2)	0.9987	two (2)	0.9925 (0.9835-1.0000)	**		Rosidae	one (1)	two (2)	1	two (2)	0.9929 (0.9825-1.0000)	**		Rosidae	one (1)	two (2)	0.9992	two (2)	0.9933 (0.9844-1.0000)	**		Rosidae	one (1)	two (2)	1	two (2)	0.9915 (0.9804-1.0000)	**		Rosidae	one (1)	two (2)	0.9986	two (2)	0.844 (0.5176-1.0000)	*		Rosidae
332_A. Androecium structural merism (4-state) (D2c)	Rosidae	pentamerous	pentamerous	1	tetramerous	0.7785 (0.0005-1.0000)	*		Rosidae	pentamerous	pentamerous	1	tetramerous	0.7128 (0.001-1.000)	*		Rosidae	pentamerous	pentamerous	0.9999	pentamerous	0.523 (0.0000-0.9998)	*		Rosidae	pentamerous	tetramerous	0.7451	tetramerous	0.7593 (0.0002-1.0000)	*		Rosidae	pentamerous	pentamerous	0.9938	tetramerous	0.5992 (0.001-1.000)	*		Rosidae	pentamerous	pentamerous	1	tetramerous	0.8739 (0.4687-1.0000)	*		Rosidae
332_B. Androecium structural merism (3-state) (D2c)	Rosidae	pentamerous	tetramerous	0.9998	tetramerous	0.5465 (0.0002-1.0000)	*		Rosidae	pentamerous	pentamerous	1	pentamerous	1 (1-1)	***		Rosidae	pentamerous	pentamerous	1	pentamerous	0.6103 (0-1)	*		Rosidae	pentamerous	tetramerous	0.999	pentamerous	0.9996 (0.997-1.000)	*		Rosidae	pentamerous	pentamerous	1	pentamerous	1 (1-1)	***		Rosidae	pentamerous	tetramerous	0.9994	pentamerous	0.9995 (0.996-1.000)	*		Rosidae
305_A. Filament (binary) (D2d)	Rosidae	typical (narrow)	typical (narrow)	0.9998	typical (narrow)	0.9948 (0.9806-0.9995)	***		Rosidae	typical (narrow)	typical (narrow)	0.9996	typical (narrow)	0.9929 (0.9753-0.9997)	***		Rosidae	typical (narrow)	typical (narrow)	0.9998	typical (narrow)	0.9927 (0.9756-0.9996)	***		Rosidae	typical (narrow)	typical (narrow)	0.9996	typical (narrow)	0.9927 (0.9733-0.9995)	***		Rosidae	typical (narrow)	typical (narrow)	0.9993	typical (narrow)	0.9907 (0.9698-0.9995)	***		Rosidae	typical (narrow)	typical (narrow)	0.9999	typical (narrow)	0.9945 (0.9780-0.9994)	***		Rosidae
311_A. Anther orientation (D2d)	Rosidae	introrse	introrse	1	introrse	0.9958 (0.9914-0.9990)	***		Rosidae	introrse	introrse	1	introrse	0.9958 (0.9905-0.9993)	***		Rosidae	introrse	introrse	1	introrse	0.9963 (0.9927-0.9991)	***		Rosidae	introrse	introrse	1	introrse	0.9956 (0.9919-0.9988)	***		Rosidae	introrse	introrse	1	introrse	0.9955 (0.991-0.999)	***		Rosidae	introrse	introrse	1	introrse	0.9931 (0.9873-0.9982)	***		Rosidae
312_A. Anther attachment (binary) (D2d)	Rosidae	dorsifixed	dorsifixed	0.9546	dorsifixed	0.9876 (0.9749-0.9972)	***		Rosidae	dorsifixed	dorsifixed	0.9456	dorsifixed	0.9874 (0.9760-0.9964)	***		Rosidae	dorsifixed	dorsifixed	0.9483	dorsifixed	0.987 (0.9743-0.9963)	***		Rosidae	dorsifixed	dorsifixed	0.9396	dorsifixed	0.9884 (0.9783-0.9960)	***		Rosidae	dorsifixed	dorsifixed	0.8723	dorsifixed	0.9852 (0.9720-0.9955)	***		Rosidae	dorsifixed	dorsifixed	0.9737	dorsifixed	0.9765 (0.9501-0.9960)	***		Rosidae
313_A. Anther dehiscence (3-state) (D2d)	Rosidae	longitudinal slit	longitudinal slit	1	longitudinal slit	0.9923 (0.9494-1.0000)	**		Rosidae	longitudinal slit	longitudinal slit	1	longitudinal slit	0.9907 (0.9409-1.0000)	**		Rosidae	longitudinal slit	longitudinal slit	1	longitudinal slit	0.9874 (0.9403-1.0000)	**		Rosidae	longitudinal slit	longitudinal slit	1	longitudinal slit	0.9792 (0.9335-1.0000)	**		Rosidae	longitudinal slit	longitudinal slit	1	longitudinal slit	0.9925 (0.9415-1.0000)	**		Rosidae	longitudinal slit	longitudinal slit	1	longitudinal slit	0.9878 (0.9208-1.0000)	**		Rosidae
401_B. Number of structural carpels (5-state) (D2c)	Rosidae	three (3) / four or five (4-5)	three (3)	0.9999	four or five (4-5)	0.983 (0.9594-0.9972)	*		Rosidae	three (3) / four or five (4-5)	four or five (4-5)	0.9998	four or five (4-5)	0.9747 (0.9396-0.9953)	*		Rosidae	four or five (4-5)	three (3)	0.9999	four or five (4-5)	0.976 (0.9515-0.9969)	*		Rosidae	three (3)	four or five (4-5)	0.9998	four or five (4-5)	0.9745 (0.9550-0.9955)	**		Rosidae	three (3) / four or five (4-5)	four or five (4-5)	0.9998	four or five (4-5)	0.98 (0.9565-0.9950)	**		Rosidae	three (3) / four or five (4-5)	four or five (4-5)	0.9994	four or five (4-5)	0.9622 (0.9219-0.9955)	*		Rosidae
400_A. Gynoecium phyllotaxy (D2d)	Rosidae	whorled	whorled	0.9768	whorled	0.6292 (0.2651-1.0000)	*		Rosidae	whorled	whorled	0.9804	whorled	0.6223 (0.2614-1.0000)	*		Rosidae	whorled	whorled	0.9796	whorled	0.6557 (0.2972-1.0000)	*		Rosidae	whorled	whorled	0.983	whorled	0.6244 (0.2687-1.0000)	*		Rosidae	whorled	whorled	0.9777	whorled	0.5971 (0.2289-1.0000)	*		Rosidae	whorled	whorled	0.967	whorled	0.5986 (0.2158-1.0000)	*		Rosidae
403_A. Fusion of ovaries (binary) (D2c)	Rosidae	fused (>5%)	fused (>5%)	0.9997	fused (>5%)	0.9792 (0.9566-1.0000)	***		Rosidae	fused (>5%)	fused (>5%)	0.9999	fused (>5%)	0.9866 (0.9849-1.0000)	***		Rosidae	fused (>5%)	fused (>5%)	0.9998	fused (>5%)	0.9902 (0.9877-1.0000)	***		Rosidae	fused (>5%)	fused (>5%)	1	fused (>5%)	0.9913 (0.9868-1.0000)	***		Rosidae	fused (>5%)	fused (>5%)	0.9996	fused (>5%)	0.986 (0.9828-1.0000)	***		Rosidae	fused (>5%)	fused (>5%)	0.9997	fused (>5%)	0.9962 (0.9857-1.0000)	***		Rosidae
411_A. Number of ovules per functional carpel (3-state) (D2c)	Rosidae	two (2)	three or more (>2)	1	three or more (>2)	0.953 (0.6423-1.0000)	*		Rosidae	two (2)	three or more (>2)	1	three or more (>2)	0.8902 (0.3593-1.0000)	*		Rosidae	two (2)	three or more (>2)	1	three or more (>2)	0.9244 (0.5484-1.0000)	*		Rosidae	two (2)	three or more (>2)	1	three or more (>2)	0.9111 (0.695-1.000)	*		Rosidae	two (2)	three or more (>2)	1	three or more (>2)	0.9285 (0.7822-1.0000)	*		Rosidae	two (2)	three or more (>2)	0.9999	three or more (>2)	0.9112 (0.3106-1.0000)	*		Rosidae
100_A. Functional sex of flowers (D2d)	Malvidae	bisexual	bisexual	1	bisexual	0.9829 (0.9039-1.0000)	**		Malvidae	bisexual	bisexual	0.9998	bisexual	0.9786 (0.8735-1.0000)	**		Malvidae	bisexual	bisexual	0.9997	bisexual	0.9424 (0.8396-1.0000)	**		Malvidae	bisexual	bisexual	0.9997	bisexual	0.9245 (0.7939-1.0000)	**		Malvidae	bisexual	bisexual	0.9997	bisexual	0.9736 (0.8305-1.0000)	**		Malvidae	bisexual	bisexual	1	bisexual	0.9869 (0.9193-1.0000)	**		Malvidae
100_B. Structural sex of flowers (D2d)	Malvidae	bisexual	bisexual	1	bisexual	0.9998 (0.9995-1.0000)	***		Malvidae	bisexual	bisexual	1	bisexual	0.9997 (0.9993-1.0000)	***		Malvidae	bisexual	bisexual	1	bisexual	0.9997 (0.9993-1.0000)	***		Malvidae	bisexual	bisexual	1	bisexual	0.9996 (0.9991-0.9999)	***		Malvidae	bisexual	bisexual	1	bisexual	0.9995 (0.9990-0.9999)	***		Malvidae	bisexual	bisexual	1	bisexual	0.9998 (0.9994-1.0000)	***		Malvidae
102_B. Ovary position (binary) (D2d)	Malvidae	superior	superior	1	superior	0.9994 (0.9988-0.9999)	***		Malvidae	superior	superior	1	superior	0.9992 (0.9981-0.9999)	***		Malvidae	superior	superior	1	superior	0.9992 (0.9984-0.9998)	***		Malvidae	superior	superior	1	superior	0.9992 (0.9983-0.9998)	***		Malvidae	superior	superior	1	superior	0.999 (0.9982-0.9998)	***		Malvidae	superior	superior	1	superior	0.9992 (0.9984-0.9999)	***		Malvidae
201_A. Perianth presence (D2c)	Malvidae	present	present	1	present	1 (0.9999-1.0000)	***		Malvidae	present	present	1	present	1 (0.9999-1.0000)	***		Malvidae	present	present	1	present	1 (0.9999-1.0000)	***		Malvidae	present	present	1	present	1 (0.9999-1.0000)	***		Malvidae	present	present	1	present	1 (0.9999-1.0000)	***		Malvidae	present	present	1	present	1 (0.9999-1.0000)	***		Malvidae
201_B. Number of perianth parts (3-state) (D2c)	Malvidae	six to ten (6-10)	six to ten (6-10)	0.9998	six to ten (6-10)	0.9906 (0.9732-0.9998)	***		Malvidae	six to ten (6-10)	six to ten (6-10)	0.9999	six to ten (6-10)	0.9922 (0.9732-0.9998)	***		Malvidae	six to ten (6-10)	six to ten (6-10)	0.9999	six to ten (6-10)	0.8659 (0.4957-0.9997)	*		Malvidae	six to ten (6-10)	six to ten (6-10)	0.9998	six to ten (6-10)	0.9862 (0.9574-0.9999)	***		Malvidae	six to ten (6-10)	six to ten (6-10)	0.9999	six to ten (6-10)	0.986 (0.9590-0.9997)	***		Malvidae	six to ten (6-10)	six to ten (6-10)	0.9998	six to ten (6-10)	0.9933 (0.9778-0.9999)	***		Malvidae
201_C. Number of perianth parts (binary) (D2c)	Malvidae	more than six (>6)	more than six (>6)	1	more than six (>6)	1 (1-1)	***		Malvidae	more than six (>6)	more than six (>6)	1	more than six (>6)	0.9999 (0.9993-1.0000)	***		Malvidae	more than six (>6)	more than six (>6)	1	more than six (>6)	0.9999 (0.9993-1.0000)	***		Malvidae	more than six (>6)	more than six (>6)	1	more than six (>6)	0.9999 (0.9991-1.0000)	***		Malvidae	more than six (>6)	more than six (>6)	1	more than six (>6)	0.9997 (0.9989-1.0000)	***		Malvidae	more than six (>6)	more than six (>6)	1	more than six (>6)	1 (1-1)	***		Malvidae
230_A. Perianth phyllotaxy (binary) (D2d)	Malvidae	whorled	whorled	1	whorled	0.9949 (0.9679-1.0000)	***		Malvidae	whorled	whorled	0.9942	whorled	0.9923 (0.9593-1.0000)	***		Malvidae	whorled	whorled	1	whorled	0.9951 (0.9657-1.0000)	***		Malvidae	whorled	whorled	1	whorled	0.9922 (0.9546-1.0000)	***		Malvidae	whorled	whorled	1	whorled	0.9923 (0.9571-1.0000)	***		Malvidae	whorled	whorled	1	whorled	0.9974 (0.9811-1.0000)	***		Malvidae
231_A. Number of perianth whorls (D2c)	Malvidae	two (2)	two (2)	1	two (2)	0.9983 (0.9939-0.9999)	***		Malvidae	two (2)	two (2)	0.9999	two (2)	0.9977 (0.9918-0.9999)	***		Malvidae	two (2)	two (2)	0.9999	two (2)	0.9974 (0.9916-0.9999)	***		Malvidae	two (2)	two (2)	0.9999	two (2)	0.9971 (0.9907-0.9999)	***		Malvidae	two (2)	two (2)	0.9999	two (2)	0.997 (0.9909-0.9999)	***		Malvidae	two (2)	two (2)	0.9999	two (2)	0.998 (0.993-1.000)	***		Malvidae
232_A. Perianth merism (4-state) (D2c)	Malvidae	pentamerous	pentamerous	1	pentamerous	0.9983 (0.9965-0.9998)	***		Malvidae	pentamerous	pentamerous	1	pentamerous	0.9982 (0.9959-0.9999)	***		Malvidae	pentamerous	pentamerous	1	pentamerous	0.9976 (0.9949-0.9999)	***		Malvidae	pentamerous	pentamerous	1	pentamerous	0.9975 (0.9942-0.9998)	***		Malvidae	pentamerous	pentamerous	1	pentamerous	0.9976 (0.9949-0.9997)	***		Malvidae	pentamerous	pentamerous	1	pentamerous	0.9984 (0.9967-0.9998)	***		Malvidae
232_B. Perianth merism (3-state) (D2c)	Malvidae	pentamerous	pentamerous	1	pentamerous	0.9991 (0.9981-0.9998)	***		Malvidae	pentamerous	pentamerous	1	pentamerous	0.999 (0.9978-1.0000)	***		Malvidae	pentamerous	pentamerous	1	pentamerous	0.9986 (0.9969-0.9999)	***		Malvidae	pentamerous	pentamerous	1	pentamerous	0.9987 (0.9972-0.9998)	***		Malvidae	pentamerous	pentamerous	1	pentamerous	0.9989 (0.9975-0.9998)	***		Malvidae	pentamerous	pentamerous	1	pentamerous	0.9991 (0.9980-0.9998)	***		Malvidae
234_A. Perianth differentiation (binary) (D2d)	Malvidae	differentiated	differentiated	0.9995	differentiated	0.9775 (0.9440-0.9988)	**		Malvidae	differentiated	differentiated	0.9989	differentiated	0.864 (0.0000-0.9962)	*		Malvidae	differentiated	differentiated	0.9989	differentiated	0.9649 (0.9097-0.9988)	**		Malvidae	differentiated	differentiated	0.9989	differentiated	0.9656 (0.9188-0.9982)	**		Malvidae	differentiated	differentiated	0.9988	differentiated	0.9717 (0.9275-0.9990)	**		Malvidae	differentiated	differentiated	0.9996	differentiated	0.9842 (0.9575-0.9991)	***		Malvidae
204_A. Fusion of perianth (D2c)	Malvidae	free (<5%)	free (<5%)	0.9964	free (<5%)	0.9537 (0.9196-0.9826)	**		Malvidae	free (<5%)	free (<5%)	0.9991	free (<5%)	0.9569 (0.9245-0.9846)	**		Malvidae	free (<5%)	free (<5%)	0.9986	free (<5%)	0.9505 (0.9152-0.9825)	**		Malvidae	free (<5%)	free (<5%)	0.9986	free (<5%)	0.9535 (0.9216-0.9801)	**		Malvidae	free (<5%)	free (<5%)	0.9983	free (<5%)	0.9448 (0.9073-0.9792)	**		Malvidae	free (<5%)	free (<5%)	0.9964	free (<5%)	0.9607 (0.9303-0.9855)	**		Malvidae
207_A. Symmetry of perianth (binary) (D2d)	Malvidae	actinomorphic	actinomorphic	0.9998	actinomorphic	0.9521 (0.7986-1.0000)	**		Malvidae	actinomorphic	actinomorphic	0.9997	actinomorphic	0.9597 (0.8089-1.0000)	**		Malvidae	actinomorphic	actinomorphic	0.9997	actinomorphic	0.972 (0.8571-1.0000)	**		Malvidae	actinomorphic	actinomorphic	0.9997	actinomorphic	0.9623 (0.8224-1.0000)	**		Malvidae	actinomorphic	actinomorphic	0.9998	actinomorphic	0.9803 (0.8999-1.0000)	**		Malvidae	actinomorphic	actinomorphic	0.9998	actinomorphic	0.9478 (0.7714-1.0000)	**		Malvidae
301_B. Number of fertile stamens (3-state) (D2c)	Malvidae	six to ten (6-10)	more than ten (>10)	0.9508	more than ten (>10)	0.6298 (0.0141-1.0000)	*		Malvidae	six to ten (6-10)	more than ten (>10)	0.9154	six to ten (6-10)	0.7329 (0.0402-0.9959)	*		Malvidae	six to ten (6-10)	more than ten (>10)	0.9346	six to ten (6-10)	0.5333 (0.0000-0.9896)	*		Malvidae	six to ten (6-10)	more than ten (>10)	0.9418	six to ten (6-10)	0.6524 (0.0176-0.9942)	*		Malvidae	six to ten (6-10)	more than ten (>10)	0.928	six to ten (6-10)	0.7808 (0.0820-0.9999)	*		Malvidae	six to ten (6-10)	more than ten (>10)	0.9453	more than ten (>10)	0.5341 (0.0086-1.0000)	*		Malvidae
301_C. Number of fertile stamens (binary) (D2c)	Malvidae	more than six (>6)	more than six (>6)	1	more than six (>6)	0.9998 (0.9993-1.0000)	***		Malvidae	more than six (>6)	more than six (>6)	1	more than six (>6)	0.9997 (0.9991-1.0000)	***		Malvidae	more than six (>6)	more than six (>6)	1	more than six (>6)	0.9996 (0.9989-1.0000)	***		Malvidae	more than six (>6)	more than six (>6)	1	more than six (>6)	0.9996 (0.9988-1.0000)	***		Malvidae	more than six (>6)	more than six (>6)	1	more than six (>6)	0.9996 (0.9989-1.0000)	***		Malvidae	more than six (>6)	more than six (>6)	1	more than six (>6)	0.9998 (0.9995-1.0000)	***		Malvidae
330_A. Androecium structural phyllotaxy (binary) (D2d)	Malvidae	whorled	whorled	1	whorled	0.9991 (0.9963-1.0000)	***		Malvidae	whorled	whorled	1	whorled	0.9991 (0.9984-1.0000)	***		Malvidae	whorled	whorled	1	whorled	0.999 (0.9966-1.0000)	***		Malvidae	whorled	whorled	1	whorled	0.9987 (0.9923-1.0000)	***		Malvidae	whorled	whorled	1	whorled	0.9985 (0.9883-1.0000)	***		Malvidae	whorled	whorled	1	whorled	0.9997 (0.9999-1.0000)	***		Malvidae
331_A. Number of androecium structural whorls (3-state) (D2c)	Malvidae	one (1) / two (2)	two (2)	0.9996	two (2)	0.9873 (0.9685-1.0000)	**		Malvidae	one (1) / two (2)	two (2)	0.9994	two (2)	0.987 (0.9586-1.0000)	**		Malvidae	one (1) / two (2)	two (2)	1	two (2)	0.987 (0.9632-1.0000)	**		Malvidae	one (1) / two (2)	two (2)	0.9994	two (2)	0.9857 (0.96-1.00)	**		Malvidae	one (1) / two (2)	two (2)	1	two (2)	0.9873 (0.9638-1.0000)	**		Malvidae	one (1) / two (2)	two (2)	0.9997	two (2)	0.8424 (0.5389-1.0000)	*		Malvidae
332_A. Androecium structural merism (4-state) (D2c)	Malvidae	pentamerous	pentamerous	1	pentamerous	0.9052 (0.8082-1.0000)	**		Malvidae	pentamerous	pentamerous	1	pentamerous	0.901 (0.7945-1.0000)	**		Malvidae	pentamerous	pentamerous	0.9999	pentamerous	0.9321 (0.8083-1.0000)	**		Malvidae	pentamerous	pentamerous	0.542	pentamerous	0.8932 (0.7893-1.0000)	**		Malvidae	pentamerous	pentamerous	0.994	pentamerous	0.9142 (0.7998-1.0000)	**		Malvidae	pentamerous	pentamerous	1	pentamerous	0.8944 (0.7956-0.9776)	**		Malvidae
332_B. Androecium structural merism (3-state) (D2c)	Malvidae	pentamerous	pentamerous	0.5684	pentamerous	0.9421 (0.8472-1.0000)	**		Malvidae	pentamerous	pentamerous	1	pentamerous	1 (1-1)	***		Malvidae	pentamerous	pentamerous	1	pentamerous	0.9511 (0.8373-1.0000)	**		Malvidae	pentamerous	pentamerous	0.5079	pentamerous	0.9995 (0.9969-1.0000)	***		Malvidae	pentamerous	pentamerous	1	pentamerous	1 (1-1)	***		Malvidae	pentamerous	pentamerous	0.5774	pentamerous	0.9997 (0.998-1.000)	***		Malvidae
305_A. Filament (binary) (D2d)	Malvidae	typical (narrow)	typical (narrow)	0.9979	typical (narrow)	0.9801 (0.8721-0.9996)	**		Malvidae	typical (narrow)	typical (narrow)	0.9973	typical (narrow)	0.9707 (0.8301-0.9994)	**		Malvidae	typical (narrow)	typical (narrow)	0.9979	typical (narrow)	0.9656 (0.8164-0.9994)	**		Malvidae	typical (narrow)	typical (narrow)	0.9974	typical (narrow)	0.9706 (0.8271-0.9992)	**		Malvidae	typical (narrow)	typical (narrow)	0.997	typical (narrow)	0.9714 (0.8227-0.9993)	**		Malvidae	typical (narrow)	typical (narrow)	0.9987	typical (narrow)	0.9873 (0.9249-0.9995)	**		Malvidae
311_A. Anther orientation (D2d)	Malvidae	introrse	introrse	0.9999	introrse	0.9966 (0.9918-1.0000)	***		Malvidae	introrse	introrse	0.9998	introrse	0.9949 (0.9878-1.0000)	***		Malvidae	introrse	introrse	0.9999	introrse	0.995 (0.9889-1.0000)	***		Malvidae	introrse	introrse	0.9998	introrse	0.9944 (0.9878-0.9996)	***		Malvidae	introrse	introrse	0.9998	introrse	0.9947 (0.9878-1.0000)	***		Malvidae	introrse	introrse	0.9999	introrse	0.9965 (0.9916-0.9999)	***		Malvidae
312_A. Anther attachment (binary) (D2d)	Malvidae	dorsifixed	dorsifixed	0.9807	dorsifixed	0.5829 (0.4591-0.6818)	*		Malvidae	dorsifixed	dorsifixed	0.9776	dorsifixed	0.5463 (0.480-0.613)	*		Malvidae	dorsifixed	dorsifixed	0.9799	dorsifixed	0.5596 (0.4850-0.6506)	*		Malvidae	dorsifixed	dorsifixed	0.9775	dorsifixed	0.5292 (0.4878-0.5774)	*		Malvidae	dorsifixed	dorsifixed	0.9743	dorsifixed	0.5268 (0.4433-0.6107)	*		Malvidae	dorsifixed	dorsifixed	0.9827	dorsifixed	0.5538 (0.4476-0.6521)	*		Malvidae
313_A. Anther dehiscence (3-state) (D2d)	Malvidae	longitudinal slit	longitudinal slit	1	longitudinal slit	0.9897 (0.9283-1.0000)	**		Malvidae	longitudinal slit	longitudinal slit	1	longitudinal slit	0.987 (0.9138-1.0000)	**		Malvidae	longitudinal slit	longitudinal slit	1	longitudinal slit	0.9809 (0.897-1.000)	**		Malvidae	longitudinal slit	longitudinal slit	1	longitudinal slit	0.9689 (0.8808-1.0000)	**		Malvidae	longitudinal slit	longitudinal slit	1	longitudinal slit	0.9906 (0.9251-1.0000)	**		Malvidae	longitudinal slit	longitudinal slit	1	longitudinal slit	0.9919 (0.9457-1.0000)	**		Malvidae
401_B. Number of structural carpels (5-state) (D2c)	Malvidae	four or five (4-5)	three (3)	0.999	four or five (4-5)	0.9311 (0.6211-0.9998)	*		Malvidae	four or five (4-5)	four or five (4-5)	0.9988	four or five (4-5)	0.8562 (0.5020-0.9987)	**		Malvidae	four or five (4-5)	three (3)	0.9989	four or five (4-5)	0.7362 (0.3904-0.9993)	*		Malvidae	four or five (4-5)	four or five (4-5)	0.999	four or five (4-5)	0.8865 (0.5546-0.9986)	**		Malvidae	four or five (4-5)	four or five (4-5)	0.9991	four or five (4-5)	0.9253 (0.6281-0.9981)	**		Malvidae	four or five (4-5)	four or five (4-5)	0.9992	four or five (4-5)	0.8514 (0.5022-0.9992)	**		Malvidae
400_A. Gynoecium phyllotaxy (D2d)	Malvidae	whorled	whorled	1	whorled	0.9815 (0.9517-1.0000)	***		Malvidae	whorled	whorled	1	whorled	0.9805 (0.9493-1.0000)	**		Malvidae	whorled	whorled	1	whorled	0.9795 (0.947-1.000)	**		Malvidae	whorled	whorled	1	whorled	0.9764 (0.9426-1.0000)	**		Malvidae	whorled	whorled	1	whorled	0.9786 (0.9463-1.0000)	**		Malvidae	whorled	whorled	1	whorled	0.9885 (0.9673-1.0000)	***		Malvidae
403_A. Fusion of ovaries (binary) (D2c)	Malvidae	fused (>5%)	fused (>5%)	1	fused (>5%)	0.9969 (0.9901-1.0000)	***		Malvidae	fused (>5%)	fused (>5%)	1	fused (>5%)	0.9972 (0.9896-1.0000)	***		Malvidae	fused (>5%)	fused (>5%)	1	fused (>5%)	0.9966 (0.9888-1.0000)	***		Malvidae	fused (>5%)	fused (>5%)	1	fused (>5%)	0.9964 (0.9877-1.0000)	***		Malvidae	fused (>5%)	fused (>5%)	1	fused (>5%)	0.9964 (0.9877-1.0000)	***		Malvidae	fused (>5%)	fused (>5%)	1	fused (>5%)	0.9992 (0.9955-1.0000)	***		Malvidae
411_A. Number of ovules per functional carpel (3-state) (D2c)	Malvidae	two (2) / three or more (>2)	three or more (>2)	0.9996	three or more (>2)	0.9776 (0.8238-1.0000)	*		Malvidae	two (2)	three or more (>2)	0.9996	three or more (>2)	0.9483 (0.8006-1.0000)	*		Malvidae	two (2) / three or more (>2)	three or more (>2)	0.9995	three or more (>2)	0.948 (0.7912-1.0000)	*		Malvidae	two (2) / three or more (>2)	three or more (>2)	0.9997	three or more (>2)	0.8994 (0.7799-1.0000)	*		Malvidae	two (2) / three or more (>2)	three or more (>2)	0.9997	three or more (>2)	0.9288 (0.815-1.000)	*		Malvidae	two (2) / three or more (>2)	three or more (>2)	0.9996	three or more (>2)	0.9717 (0.8145-1.0000)	*		Malvidae
100_A. Functional sex of flowers (D2d)	Fabidae	bisexual	bisexual	1	bisexual	0.9963 (0.9786-1.0000)	***		Fabidae	bisexual	bisexual	1	bisexual	0.9882 (0.9155-1.0000)	**		Fabidae	bisexual	bisexual	1	bisexual	0.9693 (0.887-1.000)	**		Fabidae	bisexual	bisexual	1	bisexual	0.967 (0.891-1.000)	**		Fabidae	bisexual	bisexual	1	bisexual	0.9875 (0.9094-1.0000)	**		Fabidae	bisexual	bisexual	1	bisexual	0.9966 (0.979-1.000)	***		Fabidae
100_B. Structural sex of flowers (D2d)	Fabidae	bisexual	bisexual	0.9998	bisexual	0.998 (0.9957-0.9999)	***		Fabidae	bisexual	bisexual	0.9974	bisexual	0.9864 (0.9648-0.9997)	***		Fabidae	bisexual	bisexual	0.9977	bisexual	0.9889 (0.9671-0.9998)	***		Fabidae	bisexual	bisexual	0.9976	bisexual	0.9895 (0.9708-0.9997)	***		Fabidae	bisexual	bisexual	0.9975	bisexual	0.9903 (0.9711-0.9998)	***		Fabidae	bisexual	bisexual	0.9996	bisexual	0.9974 (0.9957-0.9998)	***		Fabidae
102_B. Ovary position (binary) (D2d)	Fabidae	superior	superior	0.9999	superior	0.9983 (0.9966-0.9996)	***		Fabidae	superior	superior	0.9999	superior	0.9964 (0.9922-0.9997)	***		Fabidae	superior	superior	0.9997	superior	0.9967 (0.9924-0.9998)	***		Fabidae	superior	superior	0.9999	superior	0.9974 (0.9943-0.9996)	***		Fabidae	superior	superior	0.9999	superior	0.9977 (0.9936-0.9998)	***		Fabidae	superior	superior	0.9997	superior	0.9979 (0.9957-0.9996)	***		Fabidae
201_A. Perianth presence (D2c)	Fabidae	present	present	1	present	1 (0.9999-1.0000)	***		Fabidae	present	present	1	present	1 (0.9999-1.0000)	***		Fabidae	present	present	1	present	1 (1-1)	***		Fabidae	present	present	1	present	1 (1-1)	***		Fabidae	present	present	1	present	1 (1-1)	***		Fabidae	present	present	1	present	1 (0.9999-1.0000)	***		Fabidae
201_B. Number of perianth parts (3-state) (D2c)	Fabidae	six to ten (6-10)	six to ten (6-10)	0.9994	six to ten (6-10)	0.7665 (0.1731-0.9991)	*		Fabidae	six to ten (6-10)	six to ten (6-10)	0.9992	six to ten (6-10)	0.8605 (0.2315-0.9993)	*		Fabidae	six to ten (6-10)	six to ten (6-10)	0.9993	six to ten (6-10)	0.7541 (0.4891-0.9992)	*		Fabidae	six to ten (6-10)	six to ten (6-10)	0.9993	six to ten (6-10)	0.6419 (0.0468-0.9989)	*		Fabidae	six to ten (6-10)	six to ten (6-10)	0.9992	six to ten (6-10)	0.7559 (0.0921-0.9992)	*		Fabidae	six to ten (6-10)	six to ten (6-10)	0.9987	six to ten (6-10)	0.8551 (0.3032-0.9991)	*		Fabidae
201_C. Number of perianth parts (binary) (D2c)	Fabidae	more than six (>6)	more than six (>6)	1	more than six (>6)	1 (1-1)	***		Fabidae	more than six (>6)	more than six (>6)	1	more than six (>6)	0.9981 (0.9847-1.0000)	***		Fabidae	more than six (>6)	more than six (>6)	1	more than six (>6)	0.9986 (0.9915-1.0000)	***		Fabidae	more than six (>6)	more than six (>6)	1	more than six (>6)	0.9983 (0.9883-1.0000)	***		Fabidae	more than six (>6)	more than six (>6)	1	more than six (>6)	0.9972 (0.9885-1.0000)	***		Fabidae	more than six (>6)	more than six (>6)	1	more than six (>6)	0.9999 (1-1)	***		Fabidae
230_A. Perianth phyllotaxy (binary) (D2d)	Fabidae	whorled	whorled	1	whorled	0.9981 (0.9879-1.0000)	***		Fabidae	whorled	whorled	0.9945	whorled	0.9987 (0.9925-1.0000)	***		Fabidae	whorled	whorled	1	whorled	0.9994 (0.9959-1.0000)	***		Fabidae	whorled	whorled	1	whorled	0.9989 (0.9928-1.0000)	***		Fabidae	whorled	whorled	1	whorled	0.9991 (0.995-1.000)	***		Fabidae	whorled	whorled	1	whorled	0.9986 (0.9896-1.0000)	***		Fabidae
231_A. Number of perianth whorls (D2c)	Fabidae	two (2)	two (2)	0.9994	two (2)	0.9577 (0.7669-1.0000)	**		Fabidae	two (2)	two (2)	0.9978	two (2)	0.8846 (0.3996-0.9999)	*		Fabidae	two (2)	two (2)	0.9977	two (2)	0.8924 (0.4910-0.9999)	*		Fabidae	two (2)	two (2)	0.9976	two (2)	0.8527 (0.3649-0.9998)	*		Fabidae	two (2)	two (2)	0.9976	two (2)	0.8224 (0.3281-0.9998)	*		Fabidae	two (2)	two (2)	0.9989	two (2)	0.9602 (0.7851-0.9999)	**		Fabidae
232_A. Perianth merism (4-state) (D2c)	Fabidae	pentamerous	pentamerous	1	pentamerous	0.9987 (0.9970-0.9999)	***		Fabidae	pentamerous	pentamerous	1	pentamerous	0.9978 (0.9946-1.0000)	***		Fabidae	pentamerous	pentamerous	1	pentamerous	0.9979 (0.9941-1.0000)	***		Fabidae	pentamerous	pentamerous	1	pentamerous	0.9981 (0.9947-1.0000)	***		Fabidae	pentamerous	pentamerous	1	pentamerous	0.9965 (0.9931-0.9999)	***		Fabidae	pentamerous	pentamerous	1	pentamerous	0.9984 (0.9962-0.9999)	***		Fabidae
232_B. Perianth merism (3-state) (D2c)	Fabidae	pentamerous	pentamerous	1	pentamerous	0.9989 (0.9978-0.9997)	***		Fabidae	pentamerous	pentamerous	1	pentamerous	0.9973 (0.9947-1.0000)	***		Fabidae	pentamerous	pentamerous	1	pentamerous	0.9969 (0.9917-1.0000)	***		Fabidae	pentamerous	pentamerous	1	pentamerous	0.997 (0.9926-0.9996)	***		Fabidae	pentamerous	pentamerous	1	pentamerous	0.9965 (0.9920-0.9994)	***		Fabidae	pentamerous	pentamerous	1	pentamerous	0.9987 (0.9974-0.9997)	***		Fabidae
234_A. Perianth differentiation (binary) (D2d)	Fabidae	differentiated	differentiated	0.9967	differentiated	0.6884 (0.2105-0.9958)	*		Fabidae	differentiated	differentiated	0.9883	undifferentiated	0.6347 (0.0463-1.0000)	*		Fabidae	differentiated	differentiated	0.9872	undifferentiated	0.6067 (0.0216-0.9692)	*		Fabidae	differentiated	differentiated	0.987	undifferentiated	0.6142 (0.0279-0.9720)	*		Fabidae	differentiated	differentiated	0.9865	undifferentiated	0.5778 (0.0271-0.9772)	*		Fabidae	differentiated	differentiated	0.9957	differentiated	0.7708 (0.3189-0.9968)	*		Fabidae
204_A. Fusion of perianth (D2c)	Fabidae	free (<5%)	free (<5%)	0.9999	free (<5%)	0.9903 (0.9795-0.9981)	***		Fabidae	free (<5%)	free (<5%)	1	free (<5%)	0.9897 (0.9796-0.9977)	***		Fabidae	free (<5%)	free (<5%)	1	free (<5%)	0.9877 (0.9762-0.9968)	***		Fabidae	free (<5%)	free (<5%)	1	free (<5%)	0.9905 (0.9812-0.9973)	***		Fabidae	free (<5%)	free (<5%)	1	free (<5%)	0.988 (0.9770-0.9968)	***		Fabidae	free (<5%)	free (<5%)	0.9998	free (<5%)	0.9909 (0.9799-0.9985)	***		Fabidae
207_A. Symmetry of perianth (binary) (D2d)	Fabidae	actinomorphic	actinomorphic	0.9997	actinomorphic	0.9006 (0.7391-0.9989)	**		Fabidae	actinomorphic	actinomorphic	1	actinomorphic	0.9744 (0.8966-1.0000)	**		Fabidae	actinomorphic	actinomorphic	1	actinomorphic	0.9793 (0.9017-1.0000)	**		Fabidae	actinomorphic	actinomorphic	0.9999	actinomorphic	0.9693 (0.8775-1.0000)	**		Fabidae	actinomorphic	actinomorphic	1	actinomorphic	0.9834 (0.9237-1.0000)	**		Fabidae	actinomorphic	actinomorphic	0.9994	actinomorphic	0.8658 (0.6497-0.9996)	**		Fabidae
301_B. Number of fertile stamens (3-state) (D2c)	Fabidae	six to ten (6-10)	more than ten (>10)	1	more than ten (>10)	0.9248 (0.0221-1.0000)	*		Fabidae	six to ten (6-10)	more than ten (>10)	1	more than ten (>10)	0.7656 (0.0054-1.0000)	*		Fabidae	six to ten (6-10)	more than ten (>10)	1	more than ten (>10)	0.817 (0.0069-1.0000)	*		Fabidae	six to ten (6-10)	more than ten (>10)	1	more than ten (>10)	0.7772 (0.0089-1.0000)	*		Fabidae	six to ten (6-10)	more than ten (>10)	1	more than ten (>10)	0.5329 (0.004-1.000)	*		Fabidae	six to ten (6-10)	more than ten (>10)	0.9999	more than ten (>10)	0.8073 (0.0087-1.0000)	*		Fabidae
301_C. Number of fertile stamens (binary) (D2c)	Fabidae	more than six (>6)	more than six (>6)	1	more than six (>6)	0.9999 (0.9997-1.0000)	***		Fabidae	more than six (>6)	more than six (>6)	1	more than six (>6)	1 (0.9998-1.0000)	***		Fabidae	more than six (>6)	more than six (>6)	1	more than six (>6)	1 (0.9999-1.0000)	***		Fabidae	more than six (>6)	more than six (>6)	1	more than six (>6)	1 (0.9997-1.0000)	***		Fabidae	more than six (>6)	more than six (>6)	1	more than six (>6)	1 (0.9998-1.0000)	***		Fabidae	more than six (>6)	more than six (>6)	1	more than six (>6)	0.9999 (0.9997-1.0000)	***		Fabidae
330_A. Androecium structural phyllotaxy (binary) (D2d)	Fabidae	whorled	whorled	1	whorled	0.9996 (0.9978-1.0000)	***		Fabidae	whorled	whorled	1	whorled	0.9998 (0.9998-1.0000)	***		Fabidae	whorled	whorled	1	whorled	0.9998 (0.9996-1.0000)	***		Fabidae	whorled	whorled	1	whorled	0.9997 (0.9992-1.0000)	***		Fabidae	whorled	whorled	1	whorled	0.9998 (0.9988-1.0000)	***		Fabidae	whorled	whorled	1	whorled	0.9998 (0.9999-1.0000)	***		Fabidae
331_A. Number of androecium structural whorls (3-state) (D2c)	Fabidae	one (1) / two (2)	two (2)	1	two (2)	0.9946 (0.9904-1.0000)	**		Fabidae	one (1)	two (2)	1	two (2)	0.9952 (0.9887-1.0000)	**		Fabidae	one (1)	two (2)	1	two (2)	0.9984 (0.9944-1.0000)	**		Fabidae	one (1) / two (2)	two (2)	1	two (2)	0.9982 (0.9928-1.0000)	**		Fabidae	one (1)	two (2)	1	two (2)	0.9981 (0.9926-1.0000)	**		Fabidae	one (1) / two (2)	two (2)	0.9999	two (2)	0.8283 (0.5276-1.0000)	*		Fabidae
332_A. Androecium structural merism (4-state) (D2c)	Fabidae	pentamerous	pentamerous	1	tetramerous	0.5077 (0.0000-0.9941)	*		Fabidae	pentamerous	pentamerous	1	pentamerous	0.6046 (0.0049-1.0000)	*		Fabidae	pentamerous	pentamerous	1	pentamerous	0.7301 (0.0075-1.0000)	*		Fabidae	pentamerous	pentamerous	0.5618	pentamerous	0.5861 (0.0057-1.0000)	*		Fabidae	pentamerous	pentamerous	0.9998	pentamerous	0.6726 (0.0063-1.0000)	*		Fabidae	pentamerous	pentamerous	1	tetramerous	0.5426 (0.1182-0.9997)	*		Fabidae
332_B. Androecium structural merism (3-state) (D2c)	Fabidae	pentamerous	tetramerous	0.9736	pentamerous	0.5657 (0.0098-1.0000)	*		Fabidae	pentamerous	pentamerous	1	pentamerous	1 (1-1)	***		Fabidae	pentamerous	pentamerous	1	pentamerous	0.7274 (0.0099-1.0000)	*		Fabidae	pentamerous	tetramerous	0.9427	pentamerous	0.9999 (0.9995-1.0000)	*		Fabidae	pentamerous	pentamerous	1	pentamerous	1 (1-1)	***		Fabidae	pentamerous	tetramerous	0.9474	pentamerous	0.9998 (0.9983-1.0000)	*		Fabidae
305_A. Filament (binary) (D2d)	Fabidae	typical (narrow)	typical (narrow)	1	typical (narrow)	0.9923 (0.9821-1.0000)	***		Fabidae	typical (narrow)	typical (narrow)	1	typical (narrow)	0.989 (0.9693-1.0000)	***		Fabidae	typical (narrow)	typical (narrow)	1	typical (narrow)	0.9905 (0.9748-1.0000)	***		Fabidae	typical (narrow)	typical (narrow)	1	typical (narrow)	0.9905 (0.9743-1.0000)	***		Fabidae	typical (narrow)	typical (narrow)	1	typical (narrow)	0.9873 (0.9708-1.0000)	***		Fabidae	typical (narrow)	typical (narrow)	0.9999	typical (narrow)	0.995 (0.9874-1.0000)	***		Fabidae
311_A. Anther orientation (D2d)	Fabidae	introrse	introrse	0.9998	introrse	0.9747 (0.9559-1.0000)	***		Fabidae	introrse	introrse	0.9998	introrse	0.9659 (0.9341-1.0000)	**		Fabidae	introrse	introrse	0.9998	introrse	0.9661 (0.9384-1.0000)	**		Fabidae	introrse	introrse	0.9998	introrse	0.9707 (0.9534-1.0000)	***		Fabidae	introrse	introrse	0.9998	introrse	0.9688 (0.9409-1.0000)	**		Fabidae	introrse	introrse	0.9997	introrse	0.9643 (0.9390-0.9863)	**		Fabidae
312_A. Anther attachment (binary) (D2d)	Fabidae	dorsifixed	dorsifixed	0.9994	dorsifixed	0.9363 (0.8743-0.9813)	**		Fabidae	dorsifixed	dorsifixed	0.9997	dorsifixed	0.9383 (0.8870-0.9818)	**		Fabidae	dorsifixed	dorsifixed	0.9998	dorsifixed	0.933 (0.8801-0.9794)	**		Fabidae	dorsifixed	dorsifixed	0.9997	dorsifixed	0.9405 (0.8960-0.9755)	**		Fabidae	dorsifixed	dorsifixed	0.9994	dorsifixed	0.9342 (0.8830-0.9773)	**		Fabidae	dorsifixed	dorsifixed	0.9995	dorsifixed	0.9307 (0.8680-0.9833)	**		Fabidae
313_A. Anther dehiscence (3-state) (D2d)	Fabidae	longitudinal slit	longitudinal slit	1	longitudinal slit	0.9935 (0.9582-1.0000)	***		Fabidae	longitudinal slit	longitudinal slit	1	longitudinal slit	0.9958 (0.9718-1.0000)	***		Fabidae	longitudinal slit	longitudinal slit	1	longitudinal slit	0.9944 (0.9676-1.0000)	***		Fabidae	longitudinal slit	longitudinal slit	1	longitudinal slit	0.9901 (0.9556-1.0000)	***		Fabidae	longitudinal slit	longitudinal slit	1	longitudinal slit	0.9975 (0.9826-1.0000)	***		Fabidae	longitudinal slit	longitudinal slit	1	longitudinal slit	0.9921 (0.9512-1.0000)	***		Fabidae
401_B. Number of structural carpels (5-state) (D2c)	Fabidae	four or five (4-5)	three (3)	1	four or five (4-5)	0.973 (0.8768-1.0000)	*		Fabidae	four or five (4-5)	four or five (4-5)	1	four or five (4-5)	0.9177 (0.6346-1.0000)	**		Fabidae	four or five (4-5)	three (3)	1	four or five (4-5)	0.9171 (0.7544-1.0000)	*		Fabidae	four or five (4-5)	four or five (4-5)	1	four or five (4-5)	0.8972 (0.5123-1.0000)	**		Fabidae	four or five (4-5)	four or five (4-5)	1	four or five (4-5)	0.9438 (0.718-1.000)	**		Fabidae	four or five (4-5)	four or five (4-5)	0.9999	four or five (4-5)	0.9467 (0.7941-1.0000)	**		Fabidae
400_A. Gynoecium phyllotaxy (D2d)	Fabidae	whorled	whorled	0.9997	whorled	0.9834 (0.962-1.000)	***		Fabidae	whorled	whorled	1	whorled	0.9894 (0.971-1.000)	***		Fabidae	whorled	whorled	1	whorled	0.99 (0.9734-1.0000)	***		Fabidae	whorled	whorled	1	whorled	0.989 (0.9712-1.0000)	***		Fabidae	whorled	whorled	1	whorled	0.9907 (0.9748-1.0000)	***		Fabidae	whorled	whorled	0.9997	whorled	0.9858 (0.9662-1.0000)	***		Fabidae
403_A. Fusion of ovaries (binary) (D2c)	Fabidae	fused (>5%)	fused (>5%)	0.9998	fused (>5%)	0.8059 (0.1548-1.0000)	*		Fabidae	fused (>5%)	fused (>5%)	0.9998	fused (>5%)	0.8315 (0.1539-1.0000)	*		Fabidae	fused (>5%)	fused (>5%)	0.9998	fused (>5%)	0.8237 (0.1873-1.0000)	*		Fabidae	fused (>5%)	fused (>5%)	0.9998	fused (>5%)	0.8162 (0.1614-1.0000)	*		Fabidae	fused (>5%)	fused (>5%)	0.9998	fused (>5%)	0.8146 (0.1497-1.0000)	*		Fabidae	fused (>5%)	fused (>5%)	0.9999	fused (>5%)	0.956 (0.6932-1.0000)	**		Fabidae
411_A. Number of ovules per functional carpel (3-state) (D2c)	Fabidae	two (2)	three or more (>2)	1	three or more (>2)	0.9322 (0.458-1.000)	*		Fabidae	two (2)	three or more (>2)	1	three or more (>2)	0.8437 (0.2072-1.0000)	*		Fabidae	two (2)	three or more (>2)	1	three or more (>2)	0.8936 (0.3589-1.0000)	*		Fabidae	two (2)	three or more (>2)	1	three or more (>2)	0.8724 (0.5267-1.0000)	*		Fabidae	two (2)	three or more (>2)	1	three or more (>2)	0.8995 (0.696-1.000)	*		Fabidae	two (2)	three or more (>2)	0.9999	three or more (>2)	0.8875 (0.1831-1.0000)	*		Fabidae
[truncated: 27 more columns]

## Sheet: A
Character	Node	MP state(s)	ML state	Prob	rjMCMC state	Prob (mean and 95% HPD)	Confidence
100_A. Functional sex of flowers (D2d)
	Angiospermae	bisexual / unisexual	bisexual	1	bisexual	0.9982 (0.9899-1.0000)	**		Summary of ML model comparisons										Summary of rjMCMC results
	Mesangiospermae	bisexual	bisexual	1	bisexual	1 (1-1)	***
	Magnoliidae	bisexual	bisexual	1	bisexual	0.9998 (0.9989-1.0000)	***		Model	LogL	Npar	AIC	AICc	DeltaAICc	w	q01	q10		Model_str	Model	NrSamples	PostProb
	Monocotyledoneae	bisexual	bisexual	1	bisexual	0.9992 (0.9956-1.0000)	***		ARD	-311.35	2	626.69	626.71	1.38	0.21	0.0029	0.0006		0 Z	UNI01	68392	0.76
	Eudicotyledoneae	bisexual	bisexual	1	bisexual	0.9998 (0.9991-1.0000)	***		ARDeq*	-310.65	2	625.31	625.32	0	0.42	0.0029	0.0006		0 0	ER	21551	0.24
	Commelinidae	bisexual	bisexual	1	bisexual	0.998 (0.9891-1.0000)	***		ER	-314.41	1	630.81	630.82	5.49	0.03	0.0029	0.0029		0 1	ARD	57	0
	Pentapetalae	bisexual	bisexual	1	bisexual	1 (1-1)	***		UNI01	-311.87	1	625.73	625.74	0.41	0.34	0.003
	Superasteridae	bisexual	bisexual	1	bisexual	0.9998 (0.9987-1.0000)	***		UNI10	-354.14	1	710.28	710.29	84.96	0		0.012			Npar	Nzero	q01	q10
	Asteridae	bisexual	bisexual	1	bisexual	0.9998 (0.9988-1.0000)	***												mean	1	0.8	0.003	0.0007
	Lamiidae	bisexual	bisexual	1	bisexual	0.9995 (0.9973-1.0000)	***												95% lb	1	0	0.0023	0.0000
	Campanulidae	bisexual	bisexual	0.9997	bisexual	0.9313 (0.6512-1.0000)	**												95% ub	1	1	0.0036	0.0032
	Superrosidae	bisexual	bisexual	1	bisexual	0.9999 (0.9995-1.0000)	***
	Rosidae	bisexual	bisexual	1	bisexual	0.9983 (0.9912-1.0000)	***
	Malvidae	bisexual	bisexual	1	bisexual	0.9829 (0.9039-1.0000)	**
	Fabidae	bisexual	bisexual	1	bisexual	0.9963 (0.9786-1.0000)	***
100_B. Structural sex of flowers (D2d)
	Angiospermae	bisexual	bisexual	1	bisexual	0.9987 (0.9975-0.9997)	***		Summary of ML model comparisons										Summary of rjMCMC results
	Mesangiospermae	bisexual	bisexual	1	bisexual	1 (1-1)	***
	Magnoliidae	bisexual	bisexual	1	bisexual	0.9999 (0.9999-1.0000)	***		Model	LogL	Npar	AIC	AICc	DeltaAICc	w	q01	q10		Model_str	Model	NrSamples	PostProb
	Monocotyledoneae	bisexual	bisexual	1	bisexual	0.9991 (0.9983-0.9997)	***		ARD	-206.94	2	417.87	417.89	1.36	0.3	0.0015	0.0039		0 0	ER	89699	1
	Eudicotyledoneae	bisexual	bisexual	1	bisexual	0.9999 (0.9998-1.0000)	***		ARDeq**	-206.26	2	416.51	416.53	0	0.59	0.0015	0.0038		0 1	ARD	301	0
	Commelinidae	bisexual	bisexual	0.9999	bisexual	0.9996 (0.9992-1.0000)	***		ER	-208.93	1	419.85	419.86	3.33	0.11	0.0016	0.0016
	Pentapetalae	bisexual	bisexual	1	bisexual	1 (1-1)	***		UNI01	-223.89	1	449.78	449.79	33.26	0	0.0017				Npar	Nzero	q01	q10
	Superasteridae	bisexual	bisexual	1	bisexual	0.9997 (0.9994-1.0000)	***		UNI10	-230.84	1	463.67	463.68	47.15	0		0.0167		mean	1	0	0.0016	0.0016
	Asteridae	bisexual	bisexual	1	bisexual	0.9997 (0.9993-1.0000)	***												95% lb	1	0	0.0012	0.0011
	Lamiidae	bisexual	bisexual	0.9999	bisexual	0.9994 (0.9986-0.9999)	***												95% ub	1	0	0.0021	0.0021
	Campanulidae	bisexual	bisexual	1	bisexual	0.9997 (0.9992-1.0000)	***
	Superrosidae	bisexual	bisexual	1	bisexual	1 (0.9999-1.0000)	***
	Rosidae	bisexual	bisexual	1	bisexual	0.9992 (0.9986-0.9997)	***
	Malvidae	bisexual	bisexual	1	bisexual	0.9998 (0.9995-1.0000)	***
	Fabidae	bisexual	bisexual	0.9998	bisexual	0.998 (0.9957-0.9999)	***
102_B. Ovary position (binary) (D2d)
	Angiospermae	superior	superior	1	superior	0.9995 (0.9988-1.0000)	***		Summary of ML model comparisons										Summary of rjMCMC results
	Mesangiospermae	superior	superior	1	superior	1 (0.9999-1.0000)	***
	Magnoliidae	superior	superior	0.9997	superior	0.9956 (0.9914-0.9987)	***		Model	LogL	Npar	AIC	AICc	DeltaAICc	w	q01	q10		Model_str	Model	NrSamples	PostProb
	Monocotyledoneae	superior	superior	0.999	superior	0.9891 (0.9781-0.9972)	***		ARD	-271.07	2	546.14	546.16	1.38	0.23	0.0021	0.0035		0 0	ER	89899	1
	Eudicotyledoneae	superior	superior	1	superior	0.9998 (0.9997-1.0000)	***		ARDeq*	-270.38	2	544.76	544.77	0	0.47	0.0021	0.0035		0 Z	UNI01	51	0
	Commelinidae	superior	superior	0.8959	superior	0.9987 (0.9971-0.9998)	***		ER	-271.83	1	545.65	545.66	0.88	0.3	0.0024	0.0024		0 1	ARD	50	0
	Pentapetalae	superior	superior	0.9999	superior	0.9996 (0.9992-0.9999)	***		UNI01	-278.05	1	558.11	558.11	13.34	0	0.0027
	Superasteridae	superior	superior	1	superior	0.9994 (0.9986-0.9999)	***		UNI10	-297.1	1	596.2	596.21	51.43	0		0.0101			Npar	Nzero	q01	q10
	Asteridae	superior	superior	0.9728	superior	0.756 (0.6494-0.8673)	**												mean	1	0	0.0024	0.0024
	Lamiidae	superior	superior	0.9734	superior	0.9662 (0.9438-0.9935)	**												95% lb	1	0	0.0018	0.0019
	Campanulidae	superior	superior	0.7609	inferior	0.8808 (0.7859-0.9452)	*												95% ub	1	0	0.0030	0.0030
	Superrosidae	superior / inferior	superior	0.997	superior	0.8816 (0.8114-0.9560)	*
	Rosidae	superior / inferior	superior	0.9972	superior	0.9762 (0.9655-0.9862)	**
	Malvidae	superior	superior	1	superior	0.9994 (0.9988-0.9999)	***
	Fabidae	superior	superior	0.9999	superior	0.9983 (0.9966-0.9996)	***
201_A. Perianth presence (D2c)
	Angiospermae	present	present	1	present	0.9993 (0.9999-1.0000)	***		Summary of ML model comparisons										Summary of rjMCMC results
	Mesangiospermae	present	present	1	present	0.9993 (1-1)	***
	Magnoliidae	present	present	1	present	0.9994 (1-1)	***		Model	LogL	Npar	AIC	AICc	DeltaAICc	w	q01	q10		Model_str	Model	NrSamples	PostProb
	Monocotyledoneae	present	present	1	present	0.9993 (0.9998-1.0000)	***		ARD	-95.82	2	195.63	195.65	2.01	0.13	0	0.0005		0 0	ER	67296	0.75
	Eudicotyledoneae	present	present	1	present	0.9997 (0.9999-1.0000)	***		ARDeq	-95.12	2	194.25	194.26	0.62	0.26	0	0.0005		Z 0	UNI10	22616	0.25
	Commelinidae	present	present	1	present	0.9995 (0.9999-1.0000)	***		ER	-96.11	1	194.22	194.22	0.58	0.26	0.0005	0.0005		0 1	ARD	88	0
	Pentapetalae	present	present	1	present	1 (1-1)	***		UNI01	-109.95	1	221.9	221.91	28.27	0	0.0225
	Superasteridae	present	present	1	present	1 (0.9999-1.0000)	***		UNI10*	-95.82	1	193.63	193.64	0	0.35		0.0005			Npar	Nzero	q01	q10
	Asteridae	present	present	1	present	1 (1-1)	***												mean	1	0.3	0.0004	0.0005
	Lamiidae	present	present	1	present	0.9999 (0.9998-1.0000)	***												95% lb	1	0	0.0000	0.0003
	Campanulidae	present	present	1	present	1 (0.9999-1.0000)	***												95% ub	1	1	0.0007	0.0008
	Superrosidae	present	present	1	present	0.9999 (1-1)	***
	Rosidae	present	present	1	present	1 (0.9999-1.0000)	***
	Malvidae	present	present	1	present	1 (0.9999-1.0000)	***
	Fabidae	present	present	1	present	1 (0.9999-1.0000)	***
201_B. Number of perianth parts (3-state) (D2c)
	Angiospermae	six to ten (6-10) / more than ten (>10)	more than ten (>10)	1	more than ten (>10)	0.9605 (0.8343-1.0000)	*		Summary of ML model comparisons														Summary of rjMCMC results
	Mesangiospermae	six to ten (6-10)	more than ten (>10)	0.9999	more than ten (>10)	0.7536 (0.0518-0.9999)	*
	Magnoliidae	six to ten (6-10)	more than ten (>10)	0.9999	more than ten (>10)	0.9277 (0.8073-1.0000)	*		Model	LogL	Npar	AIC	AICc	DeltaAICc	w	q01	q02	q10	q12	q20	q21		Model_str	Model	NrSamples	PostProb
	Monocotyledoneae	six to ten (6-10)	six to ten (6-10)	0.5214	six to ten (6-10)	0.9769 (0.9398-0.9987)	**		ARD	-329	6	670	670.11	2.2	0.25	0.0047	0.0003	0.0018	0.0004	0.0036	0.0082		0 1 1 Z 0 0		41504	0.46
	Eudicotyledoneae	six to ten (6-10)	more than ten (>10)	0.995	more than ten (>10)	0.6213 (0.0802-0.9460)	*		ARDeq**	-327.9	6	667.81	667.91	0	0.74	0.0047	0.0003	0.0018	0.0004	0.0036	0.0082		0 0 0 Z 0 0		16548	0.18
	Commelinidae	six to ten (6-10)	six to ten (6-10)	0.9999	six to ten (6-10)	0.9603 (0.7976-0.9999)	**		ER	-356.1	1	714.2	714.2	46.29	0	0.0013	0.0013	0.0013	0.0013	0.0013	0.0013		0 Z 1 1 0 0		15858	0.18
	Pentapetalae	six to ten (6-10)	six to ten (6-10)	0.9959	six to ten (6-10)	0.9411 (0.3904-1.0000)	*		SYM	-344.03	3	694.05	694.09	26.17	0	0.0022	0.0012	0.0022	0.0006	0.0012	0.0006		0 Z 1 2 0 0		2655	0.03
	Superasteridae	six to ten (6-10)	six to ten (6-10)	0.9979	six to ten (6-10)	0.8997 (0.3397-0.9999)	*		SYMeq	-342.96	3	691.92	691.95	24.03	0	0.0022	0.0012	0.0022	0.0006	0.0012	0.0006		0 1 1 Z 1 0		2493	0.03
	Asteridae	six to ten (6-10)	six to ten (6-10)	0.9999	six to ten (6-10)	0.9895 (0.9665-0.9999)	***		ORD	-334.95	4	677.9	677.95	10.03	0	0.0048		0.0022	0.0005		0.0121
	Lamiidae	six to ten (6-10)	six to ten (6-10)	0.9998	six to ten (6-10)	0.9849 (0.9618-0.9995)	***		ORDeq	-333.85	4	675.7	675.75	7.84	0.01	0.0048		0.0022	0.0005		0.0121			Npar	Nzero	q01	q02	q10	q12	q20	q21
	Campanulidae	six to ten (6-10)	six to ten (6-10)	0.9999	six to ten (6-10)	0.9821 (0.9456-0.9999)	**		ORDSYM	-346.35	2	696.69	696.71	28.79	0	0.0022		0.0022	0.0008		0.0008		mean	1.9	1	0.0054	0.0019	0.0022	0.0003	0.0052	0.0055
	Superrosidae	six to ten (6-10)	six to ten (6-10)	0.9991	six to ten (6-10)	0.9404 (0.5184-1.0000)	**		ORDSYMeq	-345.29	2	694.58	694.6	26.68	0	0.0022		0.0022	0.0008		0.0008		95% lb	1	0	0.0021	0.0000	0.0009	0.0000	0.0020	0.0022
	Rosidae	six to ten (6-10)	six to ten (6-10)	0.9993	six to ten (6-10)	0.8785 (0.2636-0.9969)	*		ORDER	-356.72	1	715.44	715.44	47.53	0	0.0015		0.0015	0.0015		0.0015		95% ub	3	1	0.0085	0.0032	0.0032	0.0013	0.0089	0.0089
	Malvidae	six to ten (6-10)	six to ten (6-10)	0.9998	six to ten (6-10)	0.9906 (0.9732-0.9998)	***
	Fabidae	six to ten (6-10)	six to ten (6-10)	0.9994	six to ten (6-10)	0.7665 (0.1731-0.9991)	*
201_C. Number of perianth parts (binary) (D2c)
	Angiospermae	more than six (>6)	more than six (>6)	1	more than six (>6)	0.9989 (1-1)	***		Summary of ML model comparisons										Summary of rjMCMC results
	Mesangiospermae	one to six (1-6) / more than six (>6)	more than six (>6)	1	more than six (>6)	0.9869 (1-1)	**
	Magnoliidae	one to six (1-6) / more than six (>6)	more than six (>6)	1	more than six (>6)	0.9996 (1-1)	**		Model	LogL	Npar	AIC	AICc	DeltaAICc	w	q01	q10		Model_str	Model	NrSamples	PostProb
	Monocotyledoneae	one to six (1-6)	one to six (1-6)	0.7668	one to six (1-6)	0.9977 (0.9961-0.9991)	***		ARD	-252.06	2	508.11	508.13	1.39	0.25	0.0005	0.0027		Z 0	UNI10	88453	0.98
	Eudicotyledoneae	one to six (1-6)	more than six (>6)	1	more than six (>6)	0.9957 (1-1)	**		ARDeq*	-251.36	2	506.72	506.74	0	0.49	0.0005	0.0027		0 0	ER	1418	0.02
	Commelinidae	one to six (1-6)	one to six (1-6)	1	one to six (1-6)	0.999 (0.9976-1.0000)	***		ER	-258.22	1	518.45	518.45	11.71	0	0.0022	0.0022		0 1	ARD	129	0
	Pentapetalae	more than six (>6)	more than six (>6)	1	more than six (>6)	1 (1-1)	***		UNI01	-324.04	1	650.07	650.08	143.34	0	0.0083
	Superasteridae	more than six (>6)	more than six (>6)	1	more than six (>6)	1 (1-1)	***		UNI10	-253.02	1	508.03	508.04	1.3	0.26		0.0029			Npar	Nzero	q01	q10
	Asteridae	more than six (>6)	more than six (>6)	1	more than six (>6)	1 (1-1)	***												mean	1	1	0	0.0029
	Lamiidae	more than six (>6)	more than six (>6)	1	more than six (>6)	1 (1-1)	***												95% lb	1	1	0	0.0023
	Campanulidae	more than six (>6)	more than six (>6)	1	more than six (>6)	1 (1-1)	***												95% ub	1	1	0	0.0036
	Superrosidae	more than six (>6)	more than six (>6)	1	more than six (>6)	1 (1-1)	***
	Rosidae	more than six (>6)	more than six (>6)	1	more than six (>6)	0.9999 (1-1)	***
	Malvidae	more than six (>6)	more than six (>6)	1	more than six (>6)	1 (1-1)	***
	Fabidae	more than six (>6)	more than six (>6)	1	more than six (>6)	1 (1-1)	***
230_A. Perianth phyllotaxy (binary) (D2d)
	Angiospermae	whorled / spiral	spiral	1	whorled	0.7743 (0-1)	*		Summary of ML model comparisons										Summary of rjMCMC results
	Mesangiospermae	whorled	spiral	1	whorled	0.7957 (0.0004-1.0000)	*
	Magnoliidae	whorled	spiral	0.9997	whorled	0.7925 (0.0046-1.0000)	*		Model	LogL	Npar	AIC	AICc	DeltaAICc	w	q01	q10		Model_str	Model	NrSamples	PostProb
	Monocotyledoneae	whorled	spiral	0.5628	whorled	0.9907 (0.9431-1.0000)	*		ARD***	-70.27	2	144.54	144.56	0	0.99	0.0002	0.0112		0 0	ER	58225	0.65
	Eudicotyledoneae	whorled	spiral	0.9996	whorled	0.7972 (0.0037-1.0000)	*		ARDeq	-77.23	2	158.47	158.48	13.92	0	0.0004	0.0004		0 1	ARD	18920	0.21
	Commelinidae	whorled	whorled	0.9998	whorled	0.9947 (0.966-1.000)	***		ER	-77.87	1	157.75	157.75	13.19	0	0.0004	0.0004		0 Z	UNI01	12855	0.14
	Pentapetalae	whorled	whorled	0.9889	whorled	0.9993 (0.9972-1.0000)	***		UNI01	-78.02	1	158.05	158.05	13.49	0	0.0004
	Superasteridae	whorled	whorled	0.9925	whorled	0.9924 (0.956-1.000)	***		UNI10	-76.79	1	155.59	155.59	11.03	0		0.0184			Npar	Nzero	q01	q10
	Asteridae	whorled	whorled	0.9996	whorled	0.9981 (0.9885-1.0000)	***												mean	1.2	0.1	0.0004	0.0027
	Lamiidae	whorled	whorled	1	whorled	0.9948 (0.9675-1.0000)	***												95% lb	1	0	0.0001	0.0000
	Campanulidae	whorled	whorled	1	whorled	0.9949 (0.9673-1.0000)	***												95% ub	2	1	0.0006	0.0132
	Superrosidae	whorled	whorled	0.9941	whorled	0.9954 (0.9711-1.0000)	***
	Rosidae	whorled	whorled	0.9962	whorled	0.995 (0.9708-1.0000)	***
	Malvidae	whorled	whorled	1	whorled	0.9949 (0.9679-1.0000)	***
	Fabidae	whorled	whorled	1	whorled	0.9981 (0.9879-1.0000)	***
231_A. Number of perianth whorls (D2c)
	Angiospermae	two (2) / more than two (>2)	more than two (>2)	1	more than two (>2)	0.9981 (0.9961-0.9997)	**		Summary of ML model comparisons														Summary of rjMCMC results
	Mesangiospermae	two (2) / more than two (>2)	more than two (>2)	1	more than two (>2)	0.9903 (0.9743-0.9999)	**
	Magnoliidae	one (1) / two (2) / more than two (>2)	more than two (>2)	1	more than two (>2)	0.9914 (0.9812-0.9995)	**		Model	LogL	Npar	AIC	AICc	DeltaAICc	w	q01	q02	q10	q12	q20	q21		Model_str	Model	NrSamples	PostProb
	Monocotyledoneae	two (2)	two (2)	0.6869	two (2)	0.9948 (0.9846-0.9993)	***		ARD	-271.02	6	554.05	554.15	2.2	0.25	0.0048	0.0002	0.0015	0.0001	0.0026	0.004		0 0 0 Z 0 0		56276	0.63
	Eudicotyledoneae	two (2) / more than two (>2)	more than two (>2)	0.9905	more than two (>2)	0.8228 (0.6606-0.9676)	*		ARDeq**	-269.92	6	551.85	551.96	0	0.75	0.0048	0.0002	0.0015	0.0001	0.0026	0.004		0 1 1 Z 0 0		30645	0.34
	Commelinidae	two (2)	two (2)	1	two (2)	0.998 (0.9929-1.0000)	***		ER	-312.72	1	627.43	627.44	75.48	0	0.0011	0.0011	0.0011	0.0011	0.0011	0.0011		0 1 1 Z 1 0		2374	0.03
	Pentapetalae	two (2)	two (2)	0.9998	two (2)	0.9998 (0.9991-1.0000)	***		SYM	-294.12	3	594.23	594.26	42.31	0	0.0019	0.0008	0.0019	0.0003	0.0008	0.0003		0 1 1 Z 0 1		436	0
	Superasteridae	two (2)	two (2)	0.9998	two (2)	0.9829 (0.9075-1.0000)	**		SYMeq	-293.14	3	592.29	592.32	40.36	0	0.0019	0.0007	0.0019	0.0003	0.0007	0.0003		0 0 0 Z 1 1		57	0
	Asteridae	two (2)	two (2)	0.9999	two (2)	0.9991 (0.9966-1.0000)	***		ORD	-279.31	4	566.61	566.66	14.71	0	0.0048		0.0018	0.0001		0.0065
	Lamiidae	two (2)	two (2)	0.9999	two (2)	0.9959 (0.9870-0.9998)	***		ORDeq	-278.21	4	564.42	564.47	12.51	0	0.0048		0.0018	0.0001		0.0065			Npar	Nzero	q01	q02	q10	q12	q20	q21
	Campanulidae	two (2)	two (2)	1	two (2)	0.9968 (0.9879-0.9999)	***		ORDSYM	-300.65	2	605.29	605.31	53.35	0	0.0019		0.0019	0.0004		0.0004		mean	1.4	1	0.0027	0.0018	0.0018	0	0.0026	0.0027
	Superrosidae	two (2)	two (2)	1	two (2)	0.9994 (0.9979-1.0000)	***		ORDSYMeq	-299.57	2	603.15	603.16	51.21	0	0.0019		0.0019	0.0004		0.0004		95% lb	1	1	0.0014	0.0011	0.0011	0	0.0013	0.0014
	Rosidae	two (2)	two (2)	1	two (2)	0.9949 (0.9857-0.9994)	***		ORDER	-316.56	1	635.12	635.12	83.17	0	0.0012		0.0012	0.0012		0.0012		95% ub	2	1	0.0050	0.0023	0.0023	0	0.0050	0.0050
	Malvidae	two (2)	two (2)	1	two (2)	0.9983 (0.9939-0.9999)	***
	Fabidae	two (2)	two (2)	0.9994	two (2)	0.9577 (0.7669-1.0000)	**
232_A. Perianth merism (4-state) (D2c)
	Angiospermae	trimerous	trimerous	1	trimerous	0.9738 (0.9599-0.9905)	***		Summary of ML model comparisons																				Summary of rjMCMC results
	Mesangiospermae	trimerous	trimerous	1	trimerous	0.9954 (0.9923-1.0000)	***
	Magnoliidae	trimerous	trimerous	1	trimerous	0.9636 (0.9285-0.9923)	**		Model	LogL	Npar	AIC	AICc	DeltaAICc	w	q01	q02	q03	q10	q12	q13	q20	q21	q23	q30	q31	q32		Model_str	Model	NrSamples	PostProb
	Monocotyledoneae	trimerous	trimerous	1	trimerous	0.9966 (0.9929-0.9994)	***		ARD	-323.21	12	670.43	670.83	7.56	0.02	0.0008	0.003	0.0022	0.0015	0.0003	0	0.0005	0.0023	0.0046	0.0001	0	0.0027		0 0 0 0 Z Z 0 0 0 Z Z 0		52816	0.59
	Eudicotyledoneae	dimerous / trimerous	trimerous	0.9626	dimerous	0.7485 (0.2692-0.9965)	*		ARDeq	-321.86	12	667.71	668.11	4.84	0.07	0.0008	0.0031	0.0022	0.0015	0.0003	0	0.0005	0.0023	0.0046	0.0001	0	0.0027		Z 0 0 0 Z Z 0 0 0 Z Z 0		29483	0.33
	Commelinidae	trimerous	trimerous	1	trimerous	0.9987 (0.9965-1.0000)	***		ER	-361.47	1	724.95	724.95	61.69	0	0.0008	0.0008	0.0008	0.0008	0.0008	0.0008	0.0008	0.0008	0.0008	0.0008	0.0008	0.0008		0 0 0 0 Z Z 0 0 Z Z Z 0		6128	0.07
	Pentapetalae	pentamerous	pentamerous	0.9997	pentamerous	1 (0.9999-1.0000)	***		SYM	-326.96	6	665.92	666.03	2.76	0.18	0.0013	0.0004	0.0002	0.0013	0.0008	0.0002	0.0004	0.0008	0.0025	0.0002	0.0002	0.0025		Z 0 0 0 Z Z 0 0 Z Z Z 0		674	0.01
	Superasteridae	pentamerous	pentamerous	1	pentamerous	0.9982 (0.9960-0.9999)	***		SYMeq**	-325.58	6	663.16	663.27	0	0.73	0.0013	0.0004	0.0002	0.0013	0.0008	0.0002	0.0004	0.0008	0.0025	0.0002	0.0002	0.0025		0 0 Z 0 Z Z 0 0 0 Z Z 0		446	0
	Asteridae	pentamerous	pentamerous	0.9999	pentamerous	0.9975 (0.9954-1.0000)	***		ORD	-337.42	6	686.84	686.95	23.68	0	0			0.002	0.0008			0.0039	0.0059			0.0029
	Lamiidae	pentamerous	pentamerous	1	pentamerous	0.9969 (0.9935-0.9997)	***		ORDeq	-336.11	6	684.22	684.33	21.06	0	0			0.002	0.0009			0.0038	0.006			0.0029			Npar	Nzero	q01	q02	q03	q10	q12	q13	q20	q21	q23	q30	q31	q32
	Campanulidae	pentamerous	pentamerous	1	pentamerous	0.9979 (0.9952-0.9998)	***		ORDSYM	-345.17	3	696.34	696.37	33.1	0	0.0021			0.0021	0.0019			0.0019	0.003			0.003		mean	1	4.4	0.0017	0.0026	0.0026	0.0026	0	0	0.0026	0.0026	0.0024	0	0	0.0026
	Superrosidae	pentamerous	pentamerous	1	pentamerous	0.9998 (0.9995-1.0000)	***		ORDSYMeq	-343.8	3	693.59	693.62	30.36	0	0.0021			0.0021	0.0019			0.0019	0.003			0.003		95% lb	1	4	0.000	0.0020	0.0020	0.0020	0	0	0.0020	0.0020	0.0000	0	0	0.0020
	Rosidae	pentamerous	pentamerous	1	pentamerous	0.9979 (0.9964-0.9994)	***		ORDER	-346.74	1	695.48	695.48	32.22	0	0.0025			0.0025	0.0025			0.0025	0.0025			0.0025		95% ub	1	5	0.003	0.0032	0.0032	0.0032	0	0	0.0032	0.0032	0.0031	0	0	0.0032
	Malvidae	pentamerous	pentamerous	1	pentamerous	0.9983 (0.9965-0.9998)	***
	Fabidae	pentamerous	pentamerous	1	pentamerous	0.9987 (0.9970-0.9999)	***
232_B. Perianth merism (3-state) (D2c)
	Angiospermae	trimerous	trimerous	1	trimerous	0.9894 (0.9905-0.9969)	***		Summary of ML model comparisons														Summary of rjMCMC results
	Mesangiospermae	trimerous	trimerous	1	trimerous	0.9945 (0.9975-0.9998)	***
	Magnoliidae	trimerous	trimerous	1	trimerous	0.9861 (0.9856-0.9967)	***		Model	LogL	Npar	AIC	AICc	DeltaAICc	w	q01	q02	q10	q12	q20	q21		Model_str	Model	NrSamples	PostProb
	Monocotyledoneae	trimerous	trimerous	1	trimerous	0.994 (0.9965-0.9994)	***		ARD	-256.89	6	525.78	525.88	6.49	0.02	0.0008	0.0002	0.0022	0.004	0.0001	0.0027		0 Z 0 0 Z 0		88563	0.98
	Eudicotyledoneae	trimerous	trimerous	0.9759	pentamerous	0.607 (0.4594-0.7474)	*		ARDeq	-255.81	6	523.62	523.73	4.34	0.05	0.0008	0.0002	0.002	0.004	0.0001	0.0027		Z Z 0 0 Z 0		372	0
	Commelinidae	trimerous	trimerous	1	trimerous	0.9992 (0.9981-1.0000)	***		ER	-281.63	1	565.27	565.27	45.88	0	0.0011	0.0011	0.0011	0.0011	0.0011	0.0011		Z 0 0 0 Z 0		212	0
	Pentapetalae	pentamerous	pentamerous	0.9998	pentamerous	1 (1-1)	***		SYM	-257.78	3	521.55	521.58	2.19	0.15	0.0009	0.0002	0.0009	0.0025	0.0002	0.0025		0 Z 1 1 Z 1		164	0
	Superasteridae	pentamerous	pentamerous	1	pentamerous	0.9986 (0.9972-0.9997)	***		SYMeq*	-256.68	3	519.36	519.39	0	0.43	0.0009	0.0002	0.0009	0.0025	0.0002	0.0025		0 0 1 0 Z 1		150	0
	Asteridae	pentamerous	pentamerous	0.9999	pentamerous	0.9967 (0.9936-0.9996)	***		ORD	-257.55	4	523.11	523.16	3.76	0.07	0.001		0.0025	0.0052		0.0028
	Lamiidae	pentamerous	pentamerous	1	pentamerous	0.9984 (0.9966-0.9998)	***		ORDeq	-256.48	4	520.96	521.01	1.62	0.19	0.001		0.0025	0.0052		0.0028			Npar	Nzero	q01	q02	q10	q12	q20	q21
	Campanulidae	pentamerous	pentamerous	1	pentamerous	0.9985 (0.9965-0.9998)	***		ORDSYM	-260.66	2	525.33	525.34	5.95	0.02	0.0015		0.0015	0.0028		0.0028		mean	1	2	0.0025	0	0.0025	0.0025	0	0.0025
	Superrosidae	pentamerous	pentamerous	1	pentamerous	0.9999 (0.9998-1.0000)	***		ORDSYMeq	-259.57	2	523.14	523.16	3.77	0.07	0.0015		0.0015	0.0028		0.0028		95% lb	1	2	0.0019	0	0.0019	0.0019	0	0.0019
	Rosidae	pentamerous	pentamerous	1	pentamerous	0.9991 (0.9984-0.9996)	***		ORDER	-263.04	1	528.08	528.09	8.69	0.01	0.0024		0.0024	0.0024		0.0024		95% ub	1	2	0.0031	0	0.0031	0.0031	0	0.0031
	Malvidae	pentamerous	pentamerous	1	pentamerous	0.9991 (0.9981-0.9998)	***
	Fabidae	pentamerous	pentamerous	1	pentamerous	0.9989 (0.9978-0.9997)	***
234_A. Perianth differentiation (binary) (D2d)
	Angiospermae	undifferentiated	undifferentiated	1	undifferentiated	0.9986 (0.996-1.000)	***		Summary of ML model comparisons										Summary of rjMCMC results
	Mesangiospermae	undifferentiated	undifferentiated	1	undifferentiated	0.9982 (0.991-1.000)	***
	Magnoliidae	undifferentiated / differentiated	undifferentiated	0.9999	undifferentiated	0.9793 (0.9324-0.9998)	*		Model	LogL	Npar	AIC	AICc	DeltaAICc	w	q01	q10		Model_str	Model	NrSamples	PostProb
	Monocotyledoneae	undifferentiated	undifferentiated	1	undifferentiated	0.9986 (0.9963-0.9998)	***		ARD	-198.28	2	400.56	400.58	1.38	0.33	0.0045	0.0015		0 1	ARD	64222	0.71
	Eudicotyledoneae	undifferentiated	undifferentiated	0.9898	differentiated	0.5181 (0.1076-0.9628)	*		ARDeq**	-197.59	2	399.18	399.19	0	0.67	0.0045	0.0015		0 0	ER	25778	0.29
	Commelinidae	undifferentiated	undifferentiated	1	undifferentiated	0.9621 (0.8523-1.0000)	**		ER	-207.61	1	417.23	417.23	18.04	0	0.0025	0.0025
	Pentapetalae	differentiated	differentiated	0.9645	differentiated	0.9925 (0.9901-1.0000)	***		UNI01	-228.28	1	458.55	458.56	59.36	0	0.0089				Npar	Nzero	q01	q10
	Superasteridae	differentiated	differentiated	0.9656	differentiated	0.894 (0.5921-0.9997)	**		UNI10	-233.57	1	469.15	469.15	69.96	0		0.0034		mean	1.7	0	0.004	0.0019
	Asteridae	differentiated	differentiated	0.9988	differentiated	0.9993 (0.9981-1.0000)	***												95% lb	1	0	0.0020	0.001
	Lamiidae	differentiated	differentiated	0.9999	differentiated	0.9956 (0.9885-0.9998)	***												95% ub	2	0	0.0059	0.003
	Campanulidae	differentiated	differentiated	1	differentiated	0.9977 (0.9937-1.0000)	***
	Superrosidae	differentiated	differentiated	0.9938	differentiated	0.9955 (0.9931-1.0000)	***
	Rosidae	differentiated	differentiated	0.9961	differentiated	0.9865 (0.9673-0.9994)	***
	Malvidae	differentiated	differentiated	0.9995	differentiated	0.9775 (0.9440-0.9988)	**
	Fabidae	differentiated	differentiated	0.9967	differentiated	0.6884 (0.2105-0.9958)	*
204_A. Fusion of perianth (D2c)
	Angiospermae	free (<5%)	free (<5%)	0.9984	free (<5%)	0.9978 (0.9950-0.9997)	***		Summary of ML model comparisons										Summary of rjMCMC results
	Mesangiospermae	free (<5%)	free (<5%)	1	free (<5%)	1 (0.9999-1.0000)	***
	Magnoliidae	free (<5%)	free (<5%)	0.9998	free (<5%)	0.9805 (0.9600-0.9964)	***		Model	LogL	Npar	AIC	AICc	DeltaAICc	w	q01	q10		Model_str	Model	NrSamples	PostProb
	Monocotyledoneae	free (<5%)	free (<5%)	0.9999	free (<5%)	0.9919 (0.9839-0.9978)	***		ARD	-224.97	2	453.94	453.95	1.39	0.2	0.0044	0.0036		0 0	ER	89970	1
	Eudicotyledoneae	free (<5%)	free (<5%)	1	free (<5%)	0.9986 (0.9969-0.9998)	***		ARDeq	-224.28	2	452.55	452.57	0	0.4	0.0044	0.0036		0 1	ARD	30	0
	Commelinidae	free (<5%)	free (<5%)	0.9971	free (<5%)	0.9094 (0.8633-0.9527)	**		ER*	-225.28	1	452.56	452.56	0	0.4	0.0043	0.0043
	Pentapetalae	free (<5%)	free (<5%)	0.9971	free (<5%)	0.884 (0.7955-0.9568)	**		UNI01	-237.97	1	477.94	477.95	25.38	0	0.005				Npar	Nzero	q01	q10
	Superasteridae	free (<5%)	free (<5%)	0.9753	fused (>5%)	0.8002 (0.6837-0.8976)	*		UNI10	-237.8	1	477.61	477.61	25.05	0		0.0084		mean	1	0	0.0045	0.0045
	Asteridae	free (<5%)	free (<5%)	0.7569	fused (>5%)	0.9066 (0.8467-0.9644)	*												95% lb	1	0	0.0033	0.0033
	Lamiidae	free (<5%)	fused (>5%)	0.9777	fused (>5%)	0.9649 (0.9361-0.9928)	*												95% ub	1	0	0.0058	0.0058
	Campanulidae	fused (>5%)	fused (>5%)	0.9755	fused (>5%)	0.9749 (0.9498-0.9947)	**
	Superrosidae	free (<5%)	free (<5%)	0.9975	free (<5%)	0.9755 (0.9632-0.9880)	***
	Rosidae	free (<5%)	free (<5%)	0.9977	free (<5%)	0.9757 (0.9643-0.9858)	***
	Malvidae	free (<5%)	free (<5%)	0.9964	free (<5%)	0.9537 (0.9196-0.9826)	**
	Fabidae	free (<5%)	free (<5%)	0.9999	free (<5%)	0.9903 (0.9795-0.9981)	***
207_A. Symmetry of perianth (binary) (D2d)
	Angiospermae	actinomorphic	actinomorphic	1	actinomorphic	0.9952 (0.9894-1.0000)	***		Summary of ML model comparisons										Summary of rjMCMC results
	Mesangiospermae	actinomorphic	actinomorphic	1	actinomorphic	0.9988 (0.999-1.000)	***
	Magnoliidae	actinomorphic	actinomorphic	1	actinomorphic	0.9872 (0.9576-1.0000)	***		Model	LogL	Npar	AIC	AICc	DeltaAICc	w	q01	q10		Model_str	Model	NrSamples	PostProb
	Monocotyledoneae	actinomorphic	actinomorphic	0.9997	actinomorphic	0.9168 (0.8277-0.9910)	**		ARD	-210.43	2	424.85	424.87	1.37	0.33	0.0014	0.0065		0 1	ARD	79574	0.88
	Eudicotyledoneae	actinomorphic	actinomorphic	1	actinomorphic	0.9904 (0.9733-1.0000)	***		ARDeq**	-209.74	2	423.48	423.5	0	0.66	0.0014	0.0065		0 0	ER	10426	0.12
	Commelinidae	actinomorphic	actinomorphic	0.9959	actinomorphic	0.702 (0.3060-0.9993)	*		ER	-220.76	1	443.52	443.53	20.03	0	0.0016	0.0016
	Pentapetalae	actinomorphic	actinomorphic	1	actinomorphic	0.9988 (0.9994-1.0000)	***		UNI01	-269.97	1	541.95	541.95	118.46	0	0.0019				Npar	Nzero	q01	q10
	Superasteridae	actinomorphic	actinomorphic	1	actinomorphic	0.9947 (0.9875-1.0000)	***		UNI10	-217.94	1	437.89	437.89	14.4	0		0.0171		mean	1.9	0	0.0015	0.0062
	Asteridae	actinomorphic	actinomorphic	1	actinomorphic	0.9962 (0.9914-1.0000)	***												95% lb	1	0	0.001	0.0011
	Lamiidae	actinomorphic	actinomorphic	0.9988	actinomorphic	0.9071 (0.7290-0.9999)	**												95% ub	2	0	0.002	0.0099
	Campanulidae	actinomorphic	actinomorphic	1	actinomorphic	0.9781 (0.9075-1.0000)	**
	Superrosidae	actinomorphic	actinomorphic	1	actinomorphic	0.995 (0.988-1.000)	***
	Rosidae	actinomorphic	actinomorphic	1	actinomorphic	0.9759 (0.9181-0.9998)	**
	Malvidae	actinomorphic	actinomorphic	0.9998	actinomorphic	0.9521 (0.7986-1.0000)	**
	Fabidae	actinomorphic	actinomorphic	0.9997	actinomorphic	0.9006 (0.7391-0.9989)	**
301_B. Number of fertile stamens (3-state) (D2c)
	Angiospermae	more than ten (>10)	more than ten (>10)	1	more than ten (>10)	0.9346 (0.1423-1.0000)	*		Summary of ML model comparisons														Summary of rjMCMC results
	Mesangiospermae	one to five (1-5) / more than ten (>10)	more than ten (>10)	1	more than ten (>10)	0.9245 (0.0023-1.0000)	*
	Magnoliidae	more than ten (>10)	more than ten (>10)	1	more than ten (>10)	0.9697 (0.6231-1.0000)	**		Model	LogL	Npar	AIC	AICc	DeltaAICc	w	q01	q02	q10	q12	q20	q21		Model_str	Model	NrSamples	PostProb
	Monocotyledoneae	six to ten (6-10)	six to ten (6-10)	0.5076	six to ten (6-10)	0.9898 (0.9791-0.9961)	***		ARD	-491.8	6	995.6	995.71	2.2	0.25	0.0004	0.0003	0.0046	0.0007	0.0045	0.0085		0 0 1 0 1 1		29606	0.33
	Eudicotyledoneae	one to five (1-5) / six to ten (6-10)	more than ten (>10)	1	more than ten (>10)	0.9252 (0.0133-1.0000)	*		ARDeq**	-490.7	6	993.41	993.51	0	0.75	0.0004	0.0003	0.0046	0.0007	0.0045	0.0085		0 0 1 Z 1 1		14841	0.16
	Commelinidae	six to ten (6-10)	six to ten (6-10)	0.9998	six to ten (6-10)	0.9634 (0.7005-0.9996)	**		ER	-534.28	1	1070.56	1070.56	77.05	0	0.0027	0.0027	0.0027	0.0027	0.0027	0.0027		0 Z 0 0 1 1		8965	0.1
	Pentapetalae	six to ten (6-10)	more than ten (>10)	1	more than ten (>10)	0.9246 (0.0011-1.0000)	*		SYM	-528.85	3	1063.7	1063.73	70.21	0	0.0039	0.0007	0.0039	0.0038	0.0007	0.0038		0 0 1 0 1 2		8672	0.1
	Superasteridae	six to ten (6-10)	more than ten (>10)	1	more than ten (>10)	0.9298 (0.0841-1.0000)	*		SYMeq	-528.03	3	1062.06	1062.09	68.57	0	0.0039	0.0007	0.0039	0.0039	0.0007	0.0039		0 0 1 Z 1 2		5832	0.06
	Asteridae	one to five (1-5) / six to ten (6-10)	more than ten (>10)	0.9994	more than ten (>10)	0.9541 (0.6991-1.0000)	*		ORD	-507.79	4	1023.57	1023.62	30.11	0	0.0008		0.0061	0.0043		0.007
	Lamiidae	one to five (1-5)	one to five (1-5)	0.9995	one to five (1-5)	0.9893 (0.9765-0.9980)	***		ORDeq	-507.25	4	1022.5	1022.55	29.04	0	0.0008		0.006	0.0043		0.0069			Npar	Nzero	q01	q02	q10	q12	q20	q21
	Campanulidae	one to five (1-5)	one to five (1-5)	0.9977	one to five (1-5)	0.9957 (0.9896-0.9993)	***		ORDSYM	-531.97	2	1067.94	1067.96	74.45	0	0.0044		0.0044	0.0045		0.0045		mean	2.2	0.6	0.0005	0.0004	0.0047	0.0007	0.0051	0.0061
	Superrosidae	six to ten (6-10)	more than ten (>10)	1	more than ten (>10)	0.9233 (0.006-1.000)	*		ORDSYMeq	-531.09	2	1066.18	1066.19	72.68	0	0.0044		0.0044	0.0045		0.0045		95% lb	2	0	0.0000	0.0000	0.0015	0.0000	0.0036	0.0040
	Rosidae	six to ten (6-10)	more than ten (>10)	1	more than ten (>10)	0.9114 (0.0119-0.9995)	*		ORDER	-531.99	1	1065.98	1065.98	72.47	0	0.0044		0.0044	0.0044		0.0044		95% ub	3	2	0.0017	0.0008	0.0062	0.0042	0.0068	0.0092
	Malvidae	six to ten (6-10)	more than ten (>10)	0.9508	more than ten (>10)	0.6298 (0.0141-1.0000)	*
	Fabidae	six to ten (6-10)	more than ten (>10)	1	more than ten (>10)	0.9248 (0.0221-1.0000)	*
301_C. Number of fertile stamens (binary) (D2c)
	Angiospermae	more than six (>6)	more than six (>6)	1	more than six (>6)	1 (0.9999-1.0000)	***		Summary of ML model comparisons										Summary of rjMCMC results
	Mesangiospermae	one to six (1-6) / more than six (>6)	more than six (>6)	1	more than six (>6)	0.9898 (0.9558-1.0000)	**
	Magnoliidae	one to six (1-6) / more than six (>6)	more than six (>6)	1	more than six (>6)	1 (0.9998-1.0000)	**		Model	LogL	Npar	AIC	AICc	DeltaAICc	w	q01	q10		Model_str	Model	NrSamples	PostProb
	Monocotyledoneae	one to six (1-6)	more than six (>6)	0.5966	one to six (1-6)	0.9768 (0.9453-0.9948)	*		ARD	-290.34	2	584.69	584.7	1.39	0.33	0.0005	0.0059		0 1	ARD	90000	1
	Eudicotyledoneae	one to six (1-6)	more than six (>6)	0.9998	more than six (>6)	0.9911 (0.9618-1.0000)	**		ARDeq**	-289.65	2	583.3	583.31	0	0.67	0.0005	0.0059
	Commelinidae	one to six (1-6)	one to six (1-6)	1	one to six (1-6)	0.995 (0.9897-0.9991)	***		ER	-323.94	1	649.88	649.88	66.57	0	0.0032	0.0032			Npar	Nzero	q01	q10
	Pentapetalae	more than six (>6)	more than six (>6)	1	more than six (>6)	1 (1-1)	***		UNI01	-363.43	1	728.86	728.87	145.55	0	0.0047			mean	2	0	0.0005	0.0057
	Superasteridae	more than six (>6)	more than six (>6)	1	more than six (>6)	1 (0.9999-1.0000)	***		UNI10	-328.86	1	659.72	659.73	76.41	0		0.0074		95% lb	2	0	0.0001	0.0046
	Asteridae	more than six (>6)	more than six (>6)	0.9999	more than six (>6)	0.996 (0.987-1.000)	***												95% ub	2	0	0.0010	0.0068
	Lamiidae	one to six (1-6)	one to six (1-6)	0.9989	one to six (1-6)	0.9931 (0.9857-0.9981)	***
	Campanulidae	one to six (1-6)	one to six (1-6)	0.9954	one to six (1-6)	0.9964 (0.9912-0.9993)	***
	Superrosidae	more than six (>6)	more than six (>6)	1	more than six (>6)	1 (0.9999-1.0000)	***
	Rosidae	more than six (>6)	more than six (>6)	1	more than six (>6)	0.9956 (0.9917-0.9989)	***
	Malvidae	more than six (>6)	more than six (>6)	1	more than six (>6)	0.9998 (0.9993-1.0000)	***
	Fabidae	more than six (>6)	more than six (>6)	1	more than six (>6)	0.9999 (0.9997-1.0000)	***
330_A. Androecium structural phyllotaxy (binary) (D2d)
	Angiospermae	whorled / spiral	whorled	1	whorled	0.9236 (0.0089-1.0000)	*		Summary of ML model comparisons										Summary of rjMCMC results
	Mesangiospermae	whorled / spiral	whorled	1	whorled	0.9622 (0.8742-1.0000)	*
	Magnoliidae	whorled / spiral	whorled	1	whorled	0.9174 (0.0209-1.0000)	*		Model	LogL	Npar	AIC	AICc	DeltaAICc	w	q01	q10		Model_str	Model	NrSamples	PostProb
	Monocotyledoneae	whorled	whorled	1	whorled	0.9986 (0.9921-1.0000)	***		ARD	-60.33	2	124.66	124.68	2.01	0.13	0.0004	0		0 0	ER	64161	0.71
	Eudicotyledoneae	whorled	whorled	1	whorled	0.9756 (0.9624-1.0000)	***		ARDeq	-59.64	2	123.28	123.29	0.62	0.25	0.0004	0		0 Z	UNI01	20425	0.23
	Commelinidae	whorled	whorled	1	whorled	0.9978 (0.9901-1.0000)	***		ER	-60.58	1	123.17	123.17	0.5	0.27	0.0004	0.0004		0 1	ARD	5414	0.06
	Pentapetalae	whorled	whorled	1	whorled	1 (0.9999-1.0000)	***		UNI01*	-60.33	1	122.66	122.67	0	0.35	0.0004
	Superasteridae	whorled	whorled	1	whorled	0.9993 (0.9969-1.0000)	***		UNI10	-76.76	1	155.51	155.52	32.85	0		0.0208			Npar	Nzero	q01	q10
	Asteridae	whorled	whorled	1	whorled	0.9996 (0.9985-1.0000)	***												mean	1.1	0.2	0.0004	0.0008
	Lamiidae	whorled	whorled	1	whorled	0.9991 (0.9951-1.0000)	***												95% lb	1	0	0.0002	0.0000
	Campanulidae	whorled	whorled	1	whorled	0.9993 (0.9968-1.0000)	***												95% ub	2	1	0.0007	0.0058
	Superrosidae	whorled	whorled	1	whorled	0.9998 (0.9991-1.0000)	***
	Rosidae	whorled	whorled	1	whorled	0.9991 (0.9934-1.0000)	***
	Malvidae	whorled	whorled	1	whorled	0.9991 (0.9963-1.0000)	***
	Fabidae	whorled	whorled	1	whorled	0.9996 (0.9978-1.0000)	***
331_A. Number of androecium structural whorls (3-state) (D2c)
	Angiospermae	more than two (>2)	more than two (>2)	1	more than two (>2)	0.5651 (0.0000-0.9988)	*		Summary of ML model comparisons														Summary of rjMCMC results
	Mesangiospermae	more than two (>2)	more than two (>2)	0.9993	two (2)	0.5857 (0.0123-1.0000)	*
	Magnoliidae	more than two (>2)	more than two (>2)	0.9991	more than two (>2)	0.7957 (0.0000-0.9964)	*		Model	LogL	Npar	AIC	AICc	DeltaAICc	w	q01	q02	q10	q12	q20	q21		Model_str	Model	NrSamples	PostProb
	Monocotyledoneae	two (2)	more than two (>2)	0.9746	two (2)	0.8585 (0.5222-1.0000)	*		ARD	-231.41	6	474.81	474.92	2.18	0.2	0	0.0001	0.0068	0.0006	0	0.0113		Z Z 0 1 1 0		18422	0.2
	Eudicotyledoneae	two (2) / more than two (>2)	more than two (>2)	0.9095	two (2)	0.8915 (0.6489-1.0000)	*		ARDeq**	-230.31	6	472.63	472.73	0	0.59	0	0.0001	0.0068	0.0006	0	0.0114		Z Z 0 1 Z 0		15080	0.17
	Commelinidae	two (2)	two (2)	0.9492	two (2)	0.9808 (0.9546-1.0000)	***		ER	-280.69	1	563.38	563.38	90.65	0	0.0017	0.0017	0.0017	0.0017	0.0017	0.0017		Z 0 1 0 0 1		9375	0.1
	Pentapetalae	one (1)	two (2)	0.9934	two (2)	0.9981 (0.9995-1.0000)	**		SYM	-254.94	3	515.88	515.91	43.18	0	0.0035	0.0001	0.0035	0.0011	0.0001	0.0011		Z Z 0 1 1 1		5976	0.07
	Superasteridae	one (1)	two (2)	0.9959	two (2)	0.9884 (0.9753-1.0000)	**		SYMeq	-253.89	3	513.77	513.81	41.07	0	0.0035	0.0001	0.0035	0.0011	0.0001	0.0011		Z Z 0 1 Z 1		5425	0.06
	Asteridae	one (1)	two (2)	0.9999	two (2)	0.9851 (0.932-1.000)	*		ORD	-234.71	4	477.43	477.48	4.74	0.06	0		0.0064	0.001		0.0025
	Lamiidae	one (1)	one (1)	0.9986	one (1)	0.9899 (0.9788-0.9982)	***		ORDeq	-233.68	4	475.35	475.4	2.67	0.16	0		0.0064	0.001		0.002			Npar	Nzero	q01	q02	q10	q12	q20	q21
	Campanulidae	one (1)	one (1)	0.9937	one (1)	0.9939 (0.9857-0.9993)	***		ORDSYM	-255.53	2	515.06	515.07	42.34	0	0.0036		0.0036	0.0013		0.0013		mean	2	2.1	0.0001	0.0001	0.0067	0.0008	0.0011	0.0052
	Superrosidae	one (1)	two (2)	0.9982	two (2)	0.9966 (0.9967-1.0000)	**		ORDSYMeq	-254.46	2	512.91	512.93	40.19	0	0.0036		0.0036	0.0013		0.0013		95% lb	2	1	0.0000	0.0000	0.0050	0.0002	0.0000	0.0000
	Rosidae	one (1)	two (2)	0.999	two (2)	0.9914 (0.9842-1.0000)	**		ORDER	-261.1	1	524.2	524.2	51.47	0	0.0029		0.0029	0.0029		0.0029		95% ub	2	3	0.0005	0.0006	0.0085	0.0016	0.0061	0.0083
	Malvidae	one (1) / two (2)	two (2)	0.9996	two (2)	0.9873 (0.9685-1.0000)	**
	Fabidae	one (1) / two (2)	two (2)	1	two (2)	0.9946 (0.9904-1.0000)	**
332_A. Androecium structural merism (4-state) (D2c)
	Angiospermae	trimerous	trimerous	1	trimerous	0.8964 (0.3518-0.9993)	*		Summary of ML model comparisons																				Summary of rjMCMC results
	Mesangiospermae	trimerous	trimerous	1	trimerous	0.9134 (0.3421-1.0000)	*
	Magnoliidae	trimerous	trimerous	1	trimerous	0.8785 (0.6656-1.0000)	**		Model	LogL	Npar	AIC	AICc	DeltaAICc	w	q01	q02	q03	q10	q12	q13	q20	q21	q23	q30	q31	q32		Model_str	Model	NrSamples	PostProb
	Monocotyledoneae	trimerous	trimerous	1	trimerous	0.8533 (0.1463-1.0000)	*		ARD	-223.83	12	471.66	472.06	11.01	0	0.0068	0	0	0.0005	0.0005	0.0005	0	0	0.0038	0.0007	0.0003	0.0021		0 1 1 1 1 Z 1 Z 0 1 1 1		1749	0.02
	Eudicotyledoneae	trimerous / tetramerous / pentamerous	trimerous	0.8426	tetramerous	0.8568 (0.0184-0.9984)	*		ARDeq	-222.49	12	468.98	469.38	8.33	0.01	0.0066	0	0	0.0005	0.0005	0.0005	0	0	0.0038	0.0007	0.0003	0.0021		0 1 1 1 1 Z 1 Z 0 1 Z 1		1597	0.02
	Commelinidae	trimerous	trimerous	1	trimerous	0.9492 (0.8336-1.0000)	**		ER	-238.3	1	478.6	478.6	17.55	0	0.0009	0.0009	0.0009	0.0009	0.0009	0.0009	0.0009	0.0009	0.0009	0.0009	0.0009	0.0009		0 1 1 1 1 Z 1 Z 0 1 1 Z		1515	0.02
	Pentapetalae	pentamerous	pentamerous	1	tetramerous	0.8621 (0-1)	*		SYM	-225.85	6	463.69	463.8	2.75	0.2	0.0006	0	0.0005	0.0006	0.0004	0.0005	0	0.0004	0.0021	0.0005	0.0005	0.0021		0 Z Z Z 0 Z 0 0 0 Z Z 0		1372	0.02
	Superasteridae	pentamerous	pentamerous	1	tetramerous	0.859 (0.0011-1.0000)	*		SYMeq**	-224.47	6	460.94	461.05	0	0.79	0.0006	0	0.0005	0.0006	0.0004	0.0005	0	0.0004	0.0021	0.0005	0.0005	0.0021		Z Z Z Z 0 Z 0 0 0 Z Z 0		1289	0.01
	Asteridae	pentamerous	pentamerous	0.9995	tetramerous	0.8582 (0.0139-1.0000)	*		ORD	-237.85	6	487.71	487.82	26.77	0	100			17.7727	0.0008			0.0074	0.0106			0.0033
	Lamiidae	pentamerous	pentamerous	1	tetramerous	0.779 (0.0007-1.0000)	*		ORDeq	-237.24	6	486.48	486.59	25.54	0	100			17.7951	0.0002			0.0088	0.0083			0.0031			Npar	Nzero	q01	q02	q03	q10	q12	q13	q20	q21	q23	q30	q31	q32
	Campanulidae	pentamerous	pentamerous	1	tetramerous	0.5829 (0.0005-1.0000)	*		ORDSYM	-260.66	3	527.31	527.34	66.29	0	0.0021			0.0021	0.0032			0.0032	0.0034			0.0034		mean	1.9	3.5	0.0067	0.0012	0.0009	0.0006	0.0009	0.0002	0.0008	0.0005	0.0129	0.0006	0.0005	0.0006
	Superrosidae	pentamerous	pentamerous	1	tetramerous	0.8488 (0.0001-1.0000)	*		ORDSYMeq	-259.32	3	524.64	524.67	63.62	0	0.0021			0.0021	0.0031			0.0031	0.0034			0.0034		95% lb	1	1	0.0000	0.000	0.000	0.0000	0.0003	0.0000	0.000	0.000	0.0007	0.0000	0.0000	0.000
	Rosidae	pentamerous	pentamerous	1	tetramerous	0.7785 (0.0005-1.0000)	*		ORDER	-261.5	1	525	525	63.95	0	0.0031			0.0031	0.0031			0.0031	0.0031			0.0031		95% ub	2	6	0.0168	0.005	0.003	0.0011	0.0031	0.0008	0.003	0.003	0.0183	0.0011	0.0009	0.003
	Malvidae	pentamerous	pentamerous	1	pentamerous	0.9052 (0.8082-1.0000)	**
	Fabidae	pentamerous	pentamerous	1	tetramerous	0.5077 (0.0000-0.9941)	*
332_B. Androecium structural merism (3-state) (D2c)
	Angiospermae	trimerous	trimerous	1	trimerous	0.6983 (0.0000-0.9979)	*		Summary of ML model comparisons														Summary of rjMCMC results
	Mesangiospermae	trimerous	trimerous	1	trimerous	0.7009 (0-1)	*
	Magnoliidae	trimerous	trimerous	1	trimerous	0.7007 (0.0000-0.9998)	*		Model	LogL	Npar	AIC	AICc	DeltaAICc	w	q01	q02	q10	q12	q20	q21		Model_str	Model	NrSamples	PostProb
	Monocotyledoneae	trimerous	trimerous	1	trimerous	0.9986 (0.9945-1.0000)	***		ARD	-171.02	6	354.04	354.15	2.18	0.25	0.001	0	0	0.0147	0.0009	0.0003		0 Z Z 1 0 Z		29860	0.33
	Eudicotyledoneae	trimerous / tetramerous / pentamerous	trimerous	0.9066	tetramerous	0.6682 (0.0000-0.9902)	*		ARDeq**	-169.93	6	351.86	351.97	0	0.73	0.001	0	0	0.0147	0.0009	0.0003		Z Z 0 0 Z 0		21362	0.24
	Commelinidae	trimerous	trimerous	1	trimerous	0.9966 (0.9868-1.0000)	***		ER	-186.89	1	375.78	375.78	23.82	0	0.0011	0.0011	0.0011	0.0011	0.0011	0.0011		0 Z Z 1 0 0		12130	0.13
	Pentapetalae	pentamerous	tetramerous	0.9999	tetramerous	0.5975 (0-1)	*		SYM	-177.93	3	361.85	361.88	9.92	0.01	0.0004	0.0006	0.0004	0.0022	0.0006	0.0022		Z Z 0 0 Z 1		5078	0.06
	Superasteridae	pentamerous	tetramerous	1	tetramerous	0.6 (0.0004-1.0000)	*		SYMeq	-176.84	3	359.67	359.7	7.74	0.02	0.0004	0.0006	0.0004	0.0022	0.0006	0.0022		0 Z 0 1 0 0		3729	0.04
	Asteridae	pentamerous	tetramerous	1	tetramerous	0.6073 (0.0113-1.0000)	*		ORD	-180.2	4	368.4	368.45	16.48	0	0.0002		0.0075	0.0042		0.0029
	Lamiidae	pentamerous	tetramerous	0.9937	tetramerous	0.5688 (0.0003-1.0000)	*		ORDeq	-179.15	4	366.29	366.34	14.38	0	0.0001		0.0077	0.0039		0.0029			Npar	Nzero	q01	q02	q10	q12	q20	q21
	Campanulidae	pentamerous	tetramerous	0.9697	pentamerous	0.5293 (0.0000-0.9996)	*		ORDSYM	-187.33	2	378.67	378.68	26.72	0	0.002		0.002	0.0031		0.0031		mean	1.7	2.5	0.0007	0.0001	0.0014	0.0101	0.0006	0.0014
	Superrosidae	pentamerous	tetramerous	1	tetramerous	0.5894 (0-1)	*		ORDSYMeq	-186.26	2	376.51	376.53	24.56	0	0.002		0.002	0.0031		0.0031		95% lb	1	1	0.0000	0.0000	0.0000	0.0008	0.0000	0.0000
	Rosidae	pentamerous	tetramerous	0.9998	tetramerous	0.5465 (0.0002-1.0000)	*		ORDER	-188.09	1	378.19	378.19	26.23	0	0.0027		0.0027	0.0027		0.0027		95% ub	2	3	0.0014	0.0011	0.0056	0.0181	0.0013	0.0042
	Malvidae	pentamerous	pentamerous	0.5684	pentamerous	0.9421 (0.8472-1.0000)	**
	Fabidae	pentamerous	tetramerous	0.9736	pentamerous	0.5657 (0.0098-1.0000)	*
305_A. Filament (binary) (D2d)
	Angiospermae	laminar (wide)	laminar (wide)	0.9999	typical (narrow)	0.7986 (0.0313-0.9828)	*		Summary of ML model comparisons										Summary of rjMCMC results
	Mesangiospermae	laminar (wide)	laminar (wide)	0.9823	typical (narrow)	0.9 (0.3224-1.0000)	*
	Magnoliidae	laminar (wide)	laminar (wide)	0.9971	laminar (wide)	0.9476 (0.8963-0.9998)	**		Model	LogL	Npar	AIC	AICc	DeltaAICc	w	q01	q10		Model_str	Model	NrSamples	PostProb
	Monocotyledoneae	typical (narrow)	laminar (wide)	0.5715	typical (narrow)	0.9793 (0.8683-1.0000)	*		ARD	-171.88	2	347.76	347.77	1.16	0.36	0.008	0.0021		0 0	ER	75505	0.84
	Eudicotyledoneae	typical (narrow)	typical (narrow)	0.7656	typical (narrow)	0.9947 (0.9677-1.0000)	***		ARDeq**	-171.3	2	346.6	346.61	0	0.64	0.0083	0.0021		0 1	ARD	14486	0.16
	Commelinidae	typical (narrow)	typical (narrow)	0.6933	typical (narrow)	0.8479 (0.3479-0.9729)	*		ER	-177.52	1	357.04	357.05	10.44	0	0.0024	0.0024		Z 0	UNI10	9	0
	Pentapetalae	typical (narrow)	typical (narrow)	0.9996	typical (narrow)	0.9989 (0.9992-1.0000)	***		UNI01	-184.44	1	370.88	370.88	24.27	0	0.0148
	Superasteridae	typical (narrow)	typical (narrow)	0.9997	typical (narrow)	0.9956 (0.9815-1.0000)	***		UNI10	-187.63	1	377.25	377.26	30.65	0		0.0023			Npar	Nzero	q01	q10
	Asteridae	typical (narrow)	typical (narrow)	0.9998	typical (narrow)	0.9947 (0.9767-1.0000)	***												mean	1.2	0	0.0034	0.0024
	Lamiidae	typical (narrow)	typical (narrow)	0.998	typical (narrow)	0.9805 (0.8686-1.0000)	**												95% lb	1	0	0.0015	0.0016
	Campanulidae	typical (narrow)	typical (narrow)	0.9961	typical (narrow)	0.9272 (0.6814-0.9966)	**												95% ub	2	0	0.0098	0.0032
	Superrosidae	typical (narrow)	typical (narrow)	0.9998	typical (narrow)	0.9968 (0.9854-1.0000)	***
	Rosidae	typical (narrow)	typical (narrow)	0.9998	typical (narrow)	0.9948 (0.9806-0.9995)	***
	Malvidae	typical (narrow)	typical (narrow)	0.9979	typical (narrow)	0.9801 (0.8721-0.9996)	**
	Fabidae	typical (narrow)	typical (narrow)	1	typical (narrow)	0.9923 (0.9821-1.0000)	***
311_A. Anther orientation (D2d)
	Angiospermae	introrse	introrse	1	introrse	0.9707 (0.909-1.000)	**		Summary of ML model comparisons														Summary of rjMCMC results
	Mesangiospermae	introrse / extrorse	introrse	0.9986	introrse	0.8192 (0.5722-1.0000)	*
	Magnoliidae	extrorse	extrorse	0.8271	extrorse	0.9669 (0.9601-1.0000)	***		Model	LogL	Npar	AIC	AICc	DeltaAICc	w	q01	q02	q10	q12	q20	q21		Model_str	Model	NrSamples	PostProb
	Monocotyledoneae	introrse	introrse	0.9988	introrse	0.9772 (0.9516-0.9974)	***		ARD	-346.07	6	704.13	704.24	2.91	0.08	0.0025	0.0024	0.0153	0.0029	0.0017	0.0027		0 0 0 Z 0 0		30512	0.34
	Eudicotyledoneae	introrse / extrorse	introrse	0.9976	introrse	0.9398 (0.8903-1.0000)	*		ARDeq	-345.14	6	702.29	702.4	1.07	0.2	0.0039	0.0031	0.0134	0	0.0019	0.0023		0 0 0 0 0 0		16841	0.19
	Commelinidae	introrse	introrse	0.9926	introrse	0.8687 (0.7273-1.0000)	**		ER	-349.96	1	701.92	701.92	0.59	0.26	0.0028	0.0028	0.0028	0.0028	0.0028	0.0028		0 0 0 Z 0 Z		15510	0.17
	Pentapetalae	introrse	introrse	1	introrse	0.9999 (0.9998-1.0000)	***		SYM	-348.71	3	703.43	703.46	2.13	0.12	0.0032	0.0027	0.0032	0.0014	0.0027	0.0014		0 0 Z 0 0 0		7374	0.08
	Superasteridae	introrse	introrse	0.9999	introrse	0.9854 (0.968-1.000)	***		SYMeq*	-347.65	3	701.3	701.33	0	0.34	0.0032	0.0027	0.0032	0.0014	0.0027	0.0014		0 0 Z Z 0 0		6046	0.07
	Asteridae	introrse	introrse	0.9998	introrse	0.9928 (0.9852-1.0000)	***
	Lamiidae	introrse	introrse	0.9997	introrse	0.9948 (0.9882-0.9992)	***																	Npar	Nzero	q01	q02	q10	q12	q20	q21
	Campanulidae	introrse	introrse	1	introrse	0.9986 (0.9964-1.0000)	***																mean	1	1.2	0.0028	0.0028	0.0022	0.001	0.0027	0.0019
	Superrosidae	introrse	introrse	1	introrse	0.9996 (0.9989-1.0000)	***																95% lb	1	0	0.0021	0.0021	0.0000	0.0000	0.0020	0.0000
	Rosidae	introrse	introrse	1	introrse	0.9958 (0.9914-0.9990)	***																95% ub	1	3	0.0035	0.0035	0.0034	0.0031	0.0038	0.0032
	Malvidae	introrse	introrse	0.9999	introrse	0.9966 (0.9918-1.0000)	***
	Fabidae	introrse	introrse	0.9998	introrse	0.9747 (0.9559-1.0000)	***
312_A. Anther attachment (binary) (D2d)
	Angiospermae	basifixed	basifixed	1	basifixed	0.9957 (0.9908-0.9995)	***		Summary of ML model comparisons										Summary of rjMCMC results
	Mesangiospermae	basifixed	basifixed	0.9991	basifixed	0.9989 (0.9971-1.0000)	***
	Magnoliidae	basifixed	basifixed	0.9989	basifixed	0.9797 (0.9559-0.9962)	***		Model	LogL	Npar	AIC	AICc	DeltaAICc	w	q01	q10		Model_str	Model	NrSamples	PostProb
	Monocotyledoneae	basifixed	basifixed	0.994	basifixed	0.9113 (0.8649-0.9533)	**		ARD	-266.03	2	536.05	536.07	1.32	0.3	0.0043	0.0077		0 0	ER	89782	1
	Eudicotyledoneae	basifixed	basifixed	0.8364	basifixed	0.7813 (0.5655-0.9617)	**		ARDeq**	-265.37	2	534.74	534.75	0	0.59	0.0043	0.0077		0 1	ARD	215	0
	Commelinidae	basifixed	basifixed	0.9823	basifixed	0.9697 (0.9409-0.9909)	**		ER	-268.08	1	538.16	538.17	3.42	0.11	0.0057	0.0057		Z 0	UNI10	3	0
	Pentapetalae	basifixed	dorsifixed	0.9139	dorsifixed	0.6479 (0.4516-0.8114)	*		UNI01	-291.52	1	585.04	585.04	50.29	0	0.0061
	Superasteridae	basifixed	dorsifixed	0.92	basifixed	0.7634 (0.6033-0.9165)	*		UNI10	-277.64	1	557.28	557.28	22.53	0		0.0081			Npar	Nzero	q01	q10
	Asteridae	basifixed	dorsifixed	0.9182	basifixed	0.9105 (0.8287-0.9756)	*												mean	1	0	0.0058	0.0058
	Lamiidae	basifixed	dorsifixed	0.7175	basifixed	0.929 (0.8878-0.9655)	*												95% lb	1	0	0.0041	0.0041
	Campanulidae	dorsifixed	dorsifixed	0.9855	dorsifixed	0.976 (0.9458-0.9964)	**												95% ub	1	0	0.0076	0.0076
	Superrosidae	basifixed / dorsifixed	dorsifixed	0.921	dorsifixed	0.8677 (0.8143-0.9177)	*
	Rosidae	dorsifixed	dorsifixed	0.9546	dorsifixed	0.9876 (0.9749-0.9972)	***
	Malvidae	dorsifixed	dorsifixed	0.9807	dorsifixed	0.5829 (0.4591-0.6818)	*
	Fabidae	dorsifixed	dorsifixed	0.9994	dorsifixed	0.9363 (0.8743-0.9813)	**
313_A. Anther dehiscence (3-state) (D2d)
	Angiospermae	longitudinal slit	longitudinal slit	1	longitudinal slit	0.8243 (0-1)	*		Summary of ML model comparisons														Summary of rjMCMC results
	Mesangiospermae	longitudinal slit	longitudinal slit	1	longitudinal slit	0.8233 (0-1)	*
	Magnoliidae	longitudinal slit	longitudinal slit	1	longitudinal slit	0.8004 (0.0000-0.9999)	*		Model	LogL	Npar	AIC	AICc	DeltaAICc	w	q01	q02	q10	q12	q20	q21		Model_str	Model	NrSamples	PostProb
	Monocotyledoneae	longitudinal slit	longitudinal slit	1	longitudinal slit	0.9774 (0.8471-1.0000)	**		ARD	-56.54	6	125.08	125.18	2.2	0.11	0.0002	0.0001	0.0012	0	0.0021	0		0 0 0 Z 0 Z		20279	0.23
	Eudicotyledoneae	longitudinal slit	longitudinal slit	1	longitudinal slit	0.8238 (0-1)	*		ARDeq*	-55.44	6	122.88	122.99	0	0.33	0.0002	0.0001	0.0012	0	0.0021	0		0 0 0 Z 0 0		18573	0.21
	Commelinidae	longitudinal slit	longitudinal slit	1	longitudinal slit	0.9884 (0.9192-1.0000)	**		ER	-60.87	1	123.74	123.75	0.76	0.22	0.0002	0.0002	0.0002	0.0002	0.0002	0.0002		0 0 0 0 0 Z		16397	0.18
	Pentapetalae	longitudinal slit	longitudinal slit	1	longitudinal slit	0.8302 (0-1)	*		SYM	-59.83	3	125.66	125.69	2.7	0.08	0.0002	0.0001	0.0002	0	0.0001	0		0 0 0 0 0 0		12199	0.14
	Superasteridae	longitudinal slit	longitudinal slit	1	longitudinal slit	0.993 (0.9522-1.0000)	***		SYMeq	-58.73	3	123.46	123.49	0.5	0.25	0.0002	0.0001	0.0002	0	0.0001	0		Z Z Z 0 0 0		5079	0.06
	Asteridae	longitudinal slit	longitudinal slit	1	longitudinal slit	0.9936 (0.956-1.000)	***
	Lamiidae	longitudinal slit	longitudinal slit	1	longitudinal slit	0.9883 (0.9198-1.0000)	**																	Npar	Nzero	q01	q02	q10	q12	q20	q21
	Campanulidae	longitudinal slit	longitudinal slit	1	longitudinal slit	0.9901 (0.9306-1.0000)	**																mean	1.1	1.4	0.0002	0.0001	0.0016	0.0022	0.0026	0.0026
	Superrosidae	longitudinal slit	longitudinal slit	1	longitudinal slit	0.8299 (0-1)	*																95% lb	1	0	0.0000	0.0000	0.0000	0.0000	0.0000	0.0000
	Rosidae	longitudinal slit	longitudinal slit	1	longitudinal slit	0.9923 (0.9494-1.0000)	**																95% ub	2	3	0.0003	0.0003	0.0122	0.0216	0.0207	0.0216
	Malvidae	longitudinal slit	longitudinal slit	1	longitudinal slit	0.9897 (0.9283-1.0000)	**
	Fabidae	longitudinal slit	longitudinal slit	1	longitudinal slit	0.9935 (0.9582-1.0000)	***
401_B. Number of structural carpels (5-state) (D2c)
	Angiospermae	more than five (>5)	more than five (>5)	1	more than five (>5)	0.9957 (0.9976-1.0000)	***		Summary of ML model comparisons																												Summary of rjMCMC results
	Mesangiospermae	more than five (>5)	more than five (>5)	1	more than five (>5)	0.987 (0.9545-1.0000)	***
	Magnoliidae	more than five (>5)	more than five (>5)	1	more than five (>5)	0.9907 (0.9787-1.0000)	***		Model	LogL	Npar	AIC	AICc	DeltaAICc	w	q01	q02	q03	q04	q10	q12	q13	q14	q20	q21	q23	q24	q30	q31	q32	q34	q40	q41	q42	q43		Model_str	Model	NrSamples	PostProb
	Monocotyledoneae	three (3)	more than five (>5)	0.936	three (3)	0.874 (0.4532-0.9966)	*		ARD	-671.43	20	1382.85	1383.94	3.21	0.16	0.0011	0	0	0	0.0005	0.0013	0.0019	0	0.0006	0.0018	0.0053	0.0004	0.0011	0.0045	0	0.0014	0.0037	0.0008	0.0041	0.0004		0 Z Z Z Z 0 0 Z Z 0 0 Z 0 0 0 0 0 Z 0 0		1657	0.02
	Eudicotyledoneae	more than five (>5)	more than five (>5)	0.9988	more than five (>5)	0.5489 (0.0794-0.9359)	*		ARDeq**	-669.82	20	1379.64	1380.73	0	0.8	0.0011	0	0	0	0.0005	0.0013	0.0019	0	0.0006	0.0018	0.0053	0.0004	0.0011	0.0045	0	0.0014	0.0037	0.0008	0.0041	0.0004		0 Z Z Z Z 0 0 Z 0 0 0 0 0 1 1 0 1 0 0 0		1390	0.02
	Commelinidae	three (3)	three (3)	1	three (3)	0.9923 (0.9798-0.9997)	***		ER	-719.23	1	1440.46	1440.46	59.73	0	0.0016	0.0016	0.0016	0.0016	0.0016	0.0016	0.0016	0.0016	0.0016	0.0016	0.0016	0.0016	0.0016	0.0016	0.0016	0.0016	0.0016	0.0016	0.0016	0.0016		0 Z Z Z Z 0 0 Z 0 0 0 Z 0 1 1 0 1 0 0 0		1363	0.02
	Pentapetalae	three (3) / four or five (4-5)	three (3)	0.9997	four or five (4-5)	0.9993 (0.9984-1.0000)	*		SYM	-685	10	1390	1390.29	9.56	0.01	0.0008	0.0005	0.001	0.0037	0.0008	0.0015	0.0032	0.0004	0.0005	0.0015	0.0041	0.0009	0.001	0.0032	0.0041	0.0008	0.0037	0.0004	0.0009	0.0008		0 0 Z Z Z 0 0 Z 0 0 0 Z 0 1 1 0 1 0 0 0		1341	0.01
	Superasteridae	three (3) / four or five (4-5)	three (3)	0.9999	four or five (4-5)	0.9793 (0.8714-1.0000)	*		SYMeq	-683.44	10	1386.87	1387.15	6.42	0.03	0.0008	0.0005	0.001	0.0037	0.0008	0.0015	0.0032	0.0004	0.0005	0.0015	0.0041	0.0009	0.001	0.0032	0.0041	0.0008	0.0037	0.0004	0.0009	0.0008		0 0 Z 0 Z 0 0 Z 0 0 0 Z 0 1 1 0 1 0 0 0		1144	0.01
	Asteridae	two (2)	three (3)	0.9944	four or five (4-5)	0.8517 (0.3031-1.0000)	*		ORD	-753.8	8	1523.59	1523.78	143.05	0	0				0.0042	0.0043				0.0056	0.0076				0.0051	0.0045				0
	Lamiidae	two (2)	two (2)	0.9986	two (2)	0.9953 (0.9907-0.9991)	***		ORDeq	-752.26	8	1520.52	1520.7	139.97	0	0				0.0042	0.0043				0.0056	0.0076				0.005	0.0045				0			Npar	Nzero	q01	q02	q03	q04	q10	q12	q13	q14	q20	q21
	Campanulidae	two (2)	two (2)	0.9834	two (2)	0.7424 (0.2387-0.9997)	*		ORDSYM	-760.99	4	1529.98	1530.03	149.3	0	0.0041				0.0041	0.0056				0.0056	0.0085				0.0085	0.0046				0.0046		mean	2	4.5	0.0013	0.0006	0.0004	0.0005	0.0006	0.0012	0.0013	0.0001	0.0008	0.0012
	Superrosidae	three (3) / four or five (4-5)	three (3)	0.9999	four or five (4-5)	0.9852 (0.9191-1.0000)	*		ORDSYMeq	-759.54	4	1527.08	1527.13	146.41	0	0.0041				0.0041	0.0056				0.0056	0.0085				0.0085	0.0046				0.0046		95% lb	1	1	0.0000	0.0000	0.0000	0.0000	0.0000	0.0006	0.0006	0.0000	0.0000	0.0006
	Rosidae	three (3) / four or five (4-5)	three (3)	0.9999	four or five (4-5)	0.983 (0.9594-0.9972)	*		ORDER	-766.76	1	1535.52	1535.52	154.79	0	0.0058				0.0058	0.0058				0.0058	0.0058				0.0058	0.0058				0.0058		95% ub	2	7	0.0039	0.0016	0.0014	0.0016	0.0015	0.0028	0.0031	0.0009	0.0015	0.0028
	Malvidae	four or five (4-5)	three (3)	0.999	four or five (4-5)	0.9311 (0.6211-0.9998)	*
	Fabidae	four or five (4-5)	three (3)	1	four or five (4-5)	0.973 (0.8768-1.0000)	*
400_A. Gynoecium phyllotaxy (D2d)
	Angiospermae	whorled / spiral	spiral	1	spiral	0.9677 (0.9991-1.0000)	**		Summary of ML model comparisons										Summary of rjMCMC results
	Mesangiospermae	whorled / spiral	spiral	1	spiral	0.9412 (0.6466-1.0000)	*
	Magnoliidae	whorled / spiral	spiral	1	spiral	0.974 (0.9849-1.0000)	**		Model	LogL	Npar	AIC	AICc	DeltaAICc	w	q01	q10		Model_str	Model	NrSamples	PostProb
	Monocotyledoneae	whorled	spiral	0.5494	whorled	0.9681 (0.9275-1.0000)	*		ARD	-40	2	83.99	84.01	1.39	0.31	0.0001	0.0085		0 1	ARD	87059	0.97
	Eudicotyledoneae	whorled	spiral	0.9993	spiral	0.8864 (0.4537-1.0000)	*		ARDeq**	-39.3	2	82.61	82.62	0	0.62	0.0001	0.0085		0 0	ER	2801	0.03
	Commelinidae	whorled	whorled	0.9997	whorled	0.9688 (0.9178-1.0000)	**		ER	-51.58	1	105.16	105.16	22.54	0	0.0004	0.0004		0 Z	UNI01	140	0
	Pentapetalae	whorled	whorled	0.9741	whorled	0.9971 (0.9913-1.0000)	***		UNI01	-53.01	1	108.01	108.02	25.4	0	0.0004
	Superasteridae	whorled	whorled	0.988	whorled	0.9908 (0.9779-1.0000)	***		UNI10	-42.59	1	87.19	87.19	4.57	0.06		0.0097			Npar	Nzero	q01	q10
	Asteridae	whorled	whorled	0.9999	whorled	0.995 (0.9867-1.0000)	***												mean	2	0	0.0001	0.0086
	Lamiidae	whorled	whorled	1	whorled	0.9802 (0.9538-1.0000)	***												95% lb	2	0	0.0000	0.0043
	Campanulidae	whorled	whorled	1	whorled	0.9573 (0.9108-1.0000)	**												95% ub	2	0	0.0003	0.0143
	Superrosidae	whorled	whorled	0.9766	whorled	0.9202 (0.7535-1.0000)	**
	Rosidae	whorled	whorled	0.9768	whorled	0.6292 (0.2651-1.0000)	*
	Malvidae	whorled	whorled	1	whorled	0.9815 (0.9517-1.0000)	***
	Fabidae	whorled	whorled	0.9997	whorled	0.9834 (0.962-1.000)	***
403_A. Fusion of ovaries (binary) (D2c)
	Angiospermae	free (<5%)	free (<5%)	1	free (<5%)	0.7734 (0.0927-1.0000)	*		Summary of ML model comparisons										Summary of rjMCMC results
	Mesangiospermae	free (<5%) / fused (>5%)	free (<5%)	1	free (<5%)	0.7244 (0-1)	*
	Magnoliidae	free (<5%) / fused (>5%)	free (<5%)	0.9999	free (<5%)	0.7785 (0.1413-1.0000)	*		Model	LogL	Npar	AIC	AICc	DeltaAICc	w	q01	q10		Model_str	Model	NrSamples	PostProb
	Monocotyledoneae	fused (>5%)	free (<5%)	0.9545	fused (>5%)	0.8118 (0.4916-1.0000)	*		ARD	-94.6	2	193.19	193.21	1.39	0.33	0.0053	0.0005		0 1	ARD	66003	0.73
	Eudicotyledoneae	free (<5%) / fused (>5%)	free (<5%)	0.9993	free (<5%)	0.716 (0.0365-1.0000)	*		ARDeq**	-93.9	2	191.81	191.82	0	0.66	0.0053	0.0005		0 0	ER	23926	0.27
	Commelinidae	fused (>5%)	fused (>5%)	1	fused (>5%)	0.9961 (0.9872-1.0000)	***		ER	-103.17	1	208.34	208.34	16.52	0	0.0008	0.0008		Z 0	UNI10	71	0
	Pentapetalae	fused (>5%)	fused (>5%)	0.9961	fused (>5%)	0.9876 (0.9951-1.0000)	***		UNI01	-98.93	1	199.86	199.87	8.05	0.01	0.0114
	Superasteridae	fused (>5%)	fused (>5%)	0.9963	fused (>5%)	0.9324 (0.8257-1.0000)	**		UNI10	-107.51	1	217.02	217.02	25.2	0		0.0009			Npar	Nzero	q01	q10
	Asteridae	fused (>5%)	fused (>5%)	1	fused (>5%)	0.9987 (0.9957-1.0000)	***												mean	1.7	0	0.0044	0.0006
	Lamiidae	fused (>5%)	fused (>5%)	1	fused (>5%)	0.9946 (0.9841-1.0000)	***												95% lb	1	0	0.0005	0.0002
	Campanulidae	fused (>5%)	fused (>5%)	1	fused (>5%)	0.9965 (0.9887-1.0000)	***												95% ub	2	0	0.0081	0.0011
	Superrosidae	fused (>5%)	fused (>5%)	0.9995	fused (>5%)	0.983 (0.9807-1.0000)	***
	Rosidae	fused (>5%)	fused (>5%)	0.9997	fused (>5%)	0.9792 (0.9566-1.0000)	***
	Malvidae	fused (>5%)	fused (>5%)	1	fused (>5%)	0.9969 (0.9901-1.0000)	***
	Fabidae	fused (>5%)	fused (>5%)	0.9998	fused (>5%)	0.8059 (0.1548-1.0000)	*
411_A. Number of ovules per functional carpel (3-state) (D2c)
	Angiospermae	one (1)	three or more (>2)	1	three or more (>2)	0.9965 (0.9909-1.0000)	**		Summary of ML model comparisons														Summary of rjMCMC results
	Mesangiospermae	one (1)	three or more (>2)	1	three or more (>2)	0.9977 (0.9987-1.0000)	**
	Magnoliidae	one (1)	three or more (>2)	0.9997	three or more (>2)	0.9718 (0.7997-1.0000)	*		Model	LogL	Npar	AIC	AICc	DeltaAICc	w	q01	q02	q10	q12	q20	q21		Model_str	Model	NrSamples	PostProb
	Monocotyledoneae	one (1) / three or more (>2)	three or more (>2)	1	three or more (>2)	0.9962 (0.9781-1.0000)	**		ARD	-388.1	6	788.19	788.3	2.18	0.25	0.0013	0.0008	0.0045	0.0007	0.004	0.0042		Z Z 0 Z 0 0		77275	0.86
	Eudicotyledoneae	three or more (>2)	three or more (>2)	1	three or more (>2)	0.9799 (0.8532-1.0000)	**		ARDeq**	-387	6	786.01	786.11	0	0.75	0.0013	0.0008	0.0045	0.0007	0.004	0.0042		0 Z 0 0 0 0		9140	0.1
	Commelinidae	one (1)	three or more (>2)	0.7521	three or more (>2)	0.8989 (0.1737-1.0000)	*		ER	-401.47	1	804.94	804.95	18.83	0	0.0029	0.0029	0.0029	0.0029	0.0029	0.0029		Z Z 0 0 0 0		2671	0.03
	Pentapetalae	three or more (>2)	three or more (>2)	1	three or more (>2)	0.9978 (0.9991-1.0000)	***		SYM	-400.9	3	807.81	807.84	21.72	0	0.0025	0.0028	0.0025	0.0035	0.0028	0.0035		Z Z 0 0 Z 0		160	0
	Superasteridae	three or more (>2)	three or more (>2)	0.9999	three or more (>2)	0.9953 (0.989-1.000)	***		SYMeq	-399.99	3	805.98	806.01	19.89	0	0.0026	0.0028	0.0026	0.0035	0.0028	0.0035		Z Z 0 1 1 0		156	0
	Asteridae	one (1)	three or more (>2)	0.9979	three or more (>2)	0.9953 (0.9799-1.0000)	**		ORD	-399.37	4	806.75	806.8	20.69	0	0.0004		0.0076	0.0068		0.0053
	Lamiidae	two (2) / three or more (>2)	three or more (>2)	0.9999	three or more (>2)	0.9839 (0.8804-1.0000)	*		ORDeq	-398.28	4	804.57	804.62	18.5	0	0.0004		0.0076	0.0068		0.0053			Npar	Nzero	q01	q02	q10	q12	q20	q21
	Campanulidae	one (1)	three or more (>2)	0.9973	three or more (>2)	0.9707 (0.8047-1.0000)	*		ORDSYM	-413.33	2	830.66	830.67	44.56	0	0.0056		0.0056	0.0076		0.0076		mean	1	2.8	0.0004	0	0.0043	0.0005	0.0043	0.0043
	Superrosidae	two (2) / three or more (>2)	three or more (>2)	1	three or more (>2)	0.9859 (0.9299-1.0000)	*		ORDSYMeq	-412.46	2	828.92	828.94	42.82	0	0.0056		0.0056	0.0075		0.0075		95% lb	1	1	0.0000	0	0.0035	0.000	0.0035	0.0035
	Rosidae	two (2)	three or more (>2)	1	three or more (>2)	0.953 (0.6423-1.0000)	*		ORDER	-414.21	1	830.42	830.43	44.32	0	0.0064		0.0064	0.0064		0.0064		95% ub	1	3	0.0038	0	0.0052	0.004	0.0052	0.0052
	Malvidae	two (2) / three or more (>2)	three or more (>2)	0.9996	three or more (>2)	0.9776 (0.8238-1.0000)	*
	Fabidae	two (2)	three or more (>2)	1	three or more (>2)	0.9322 (0.458-1.000)	*
[truncated: 10 more columns]

## Sheet: B
Character	Node	MP state(s)	ML state	Prob	rjMCMC state	Prob (mean and 95% HPD)	Confidence
100_A. Functional sex of flowers (D2d)
	Angiospermae	bisexual / unisexual	bisexual	1	bisexual	0.9994 (0.9964-1.0000)	**		Summary of ML model comparisons										Summary of rjMCMC results
	Mesangiospermae	bisexual	bisexual	1	bisexual	1 (0.9999-1.0000)	***
	Magnoliidae	bisexual	bisexual	1	bisexual	0.9998 (0.999-1.000)	***		Model	LogL	Npar	AIC	AICc	DeltaAICc	w	q01	q10		Model_str	Model	NrSamples	PostProb
	Monocotyledoneae	bisexual	bisexual	1	bisexual	0.9995 (0.997-1.000)	***		ARD	-312.19	2	628.38	628.39	1.39	0.22	0.003	0.0006		0 Z	UNI01	72066	0.8
	Eudicotyledoneae	bisexual	bisexual	1	bisexual	0.9999 (0.9991-1.0000)	***		ARDeq*	-311.5	2	626.99	627.01	0	0.44	0.003	0.0006		0 0	ER	17843	0.2
	Commelinidae	bisexual	bisexual	0.9999	bisexual	0.9915 (0.9457-1.0000)	**		ER	-315.39	1	632.78	632.79	5.78	0.02	0.0029	0.0029		0 1	ARD	91	0
	Pentapetalae	bisexual	bisexual	1	bisexual	1 (1-1)	***		UNI01	-312.84	1	627.68	627.69	0.68	0.31	0.003
	Superasteridae	bisexual	bisexual	1	bisexual	0.9999 (0.9992-1.0000)	***		UNI10	-355.44	1	712.88	712.88	85.87	0		0.0117			Npar	Nzero	q01	q10
	Asteridae	bisexual	bisexual	1	bisexual	0.9999 (0.9995-1.0000)	***												mean	1	0.8	0.003	0.0006
	Lamiidae	bisexual	bisexual	1	bisexual	0.9995 (0.9971-1.0000)	***												95% lb	1	0	0.0024	0.0000
	Campanulidae	bisexual	bisexual	0.9997	bisexual	0.9499 (0.6884-1.0000)	**												95% ub	1	1	0.0036	0.0031
	Superrosidae	bisexual	bisexual	1	bisexual	0.9999 (0.9997-1.0000)	***
	Rosidae	bisexual	bisexual	1	bisexual	0.9985 (0.9908-1.0000)	***
	Malvidae	bisexual	bisexual	0.9998	bisexual	0.9786 (0.8735-1.0000)	**
	Fabidae	bisexual	bisexual	1	bisexual	0.9882 (0.9155-1.0000)	**
100_B. Structural sex of flowers (D2d)
	Angiospermae	bisexual	bisexual	1	bisexual	0.9995 (0.9993-0.9998)	***		Summary of ML model comparisons										Summary of rjMCMC results
	Mesangiospermae	bisexual	bisexual	1	bisexual	0.9999 (0.9999-1.0000)	***
	Magnoliidae	bisexual	bisexual	1	bisexual	0.9999 (0.9999-1.0000)	***		Model	LogL	Npar	AIC	AICc	DeltaAICc	w	q01	q10		Model_str	Model	NrSamples	PostProb
	Monocotyledoneae	bisexual	bisexual	1	bisexual	0.9991 (0.9984-0.9997)	***		ARD	-207.74	2	419.48	419.49	1.37	0.28	0.0015	0.0039		0 0	ER	89817	1
	Eudicotyledoneae	bisexual	bisexual	1	bisexual	0.9999 (0.9998-1.0000)	***		ARDeq**	-207.06	2	418.11	418.13	0	0.56	0.0015	0.0039		0 1	ARD	183	0
	Commelinidae	bisexual	bisexual	1	bisexual	0.9996 (0.999-1.000)	***		ER	-209.28	1	420.56	420.57	2.44	0.16	0.0016	0.0016
	Pentapetalae	bisexual	bisexual	1	bisexual	1 (0.9998-1.0000)	***		UNI01	-226.28	1	454.56	454.56	36.43	0	0.0017				Npar	Nzero	q01	q10
	Superasteridae	bisexual	bisexual	1	bisexual	0.9998 (0.9996-1.0000)	***		UNI10	-229.76	1	461.52	461.53	43.4	0		0.0164		mean	1	0	0.0016	0.0016
	Asteridae	bisexual	bisexual	1	bisexual	0.9999 (0.9998-1.0000)	***												95% lb	1	0	0.0012	0.0012
	Lamiidae	bisexual	bisexual	0.9999	bisexual	0.9993 (0.9985-0.9999)	***												95% ub	1	0	0.0021	0.0021
	Campanulidae	bisexual	bisexual	1	bisexual	0.9996 (0.9989-0.9999)	***
	Superrosidae	bisexual	bisexual	1	bisexual	1 (0.9999-1.0000)	***
	Rosidae	bisexual	bisexual	1	bisexual	0.9992 (0.9985-0.9997)	***
	Malvidae	bisexual	bisexual	1	bisexual	0.9997 (0.9993-1.0000)	***
	Fabidae	bisexual	bisexual	0.9974	bisexual	0.9864 (0.9648-0.9997)	***
102_B. Ovary position (binary) (D2d)
	Angiospermae	superior	superior	1	superior	0.9996 (0.9997-1.0000)	***		Summary of ML model comparisons										Summary of rjMCMC results
	Mesangiospermae	superior	superior	1	superior	0.9999 (0.9999-1.0000)	***
	Magnoliidae	superior	superior	0.9997	superior	0.9953 (0.9910-0.9989)	***		Model	LogL	Npar	AIC	AICc	DeltaAICc	w	q01	q10		Model_str	Model	NrSamples	PostProb
	Monocotyledoneae	superior	superior	0.9987	superior	0.9911 (0.9827-0.9979)	***		ARD	-273.09	2	550.19	550.2	1.38	0.23	0.0021	0.0034		0 0	ER	89885	1
	Eudicotyledoneae	superior	superior	1	superior	0.9998 (0.9997-1.0000)	***		ARDeq*	-272.4	2	548.8	548.82	0	0.45	0.0021	0.0034		0 1	ARD	72	0
	Commelinidae	superior	superior	0.7957	superior	0.9964 (0.9919-0.9995)	***		ER	-273.76	1	549.53	549.53	0.71	0.32	0.0024	0.0024		0 Z	UNI01	43	0
	Pentapetalae	superior	superior	0.9998	superior	0.999 (0.9972-0.9999)	***		UNI01	-281.53	1	565.06	565.06	16.24	0	0.0027
	Superasteridae	superior	superior	1	superior	0.9995 (0.9989-0.9999)	***		UNI10	-296.7	1	595.39	595.4	46.58	0		0.0099			Npar	Nzero	q01	q10
	Asteridae	superior	superior	0.9773	superior	0.7633 (0.5959-0.8747)	**												mean	1	0	0.0024	0.0024
	Lamiidae	superior	superior	0.9816	superior	0.968 (0.9376-0.9892)	**												95% lb	1	0	0.0019	0.0019
	Campanulidae	superior	superior	0.8158	inferior	0.8527 (0.7410-0.9442)	*												95% ub	1	0	0.0030	0.0030
	Superrosidae	superior	superior	0.9923	superior	0.7874 (0.4970-0.9688)	*
	Rosidae	superior	superior	0.9925	superior	0.9521 (0.8716-0.9892)	**
	Malvidae	superior	superior	1	superior	0.9992 (0.9981-0.9999)	***
	Fabidae	superior	superior	0.9999	superior	0.9964 (0.9922-0.9997)	***
201_A. Perianth presence (D2c)
	Angiospermae	present	present	1	present	0.9999 (0.9988-1.0000)	***		Summary of ML model comparisons										Summary of rjMCMC results
	Mesangiospermae	present	present	1	present	1 (0.9999-1.0000)	***
	Magnoliidae	present	present	1	present	1 (1-1)	***		Model	LogL	Npar	AIC	AICc	DeltaAICc	w	q01	q10		Model_str	Model	NrSamples	PostProb
	Monocotyledoneae	present	present	1	present	0.9999 (0.9998-1.0000)	***		ARD	-95.71	2	195.41	195.43	2.01	0.13	0	0.0005		0 0	ER	67025	0.74
	Eudicotyledoneae	present	present	1	present	1 (1-1)	***		ARDeq	-95.01	2	194.03	194.04	0.62	0.26	0	0.0005		Z 0	UNI10	22956	0.26
	Commelinidae	present	present	1	present	1 (0.9999-1.0000)	***		ER	-96.02	1	194.05	194.05	0.63	0.26	0.0005	0.0005		0 1	ARD	19	0
	Pentapetalae	present	present	1	present	1 (1-1)	***		UNI01	-108.51	1	219.02	219.02	25.61	0	0.0222
	Superasteridae	present	present	1	present	1 (1-1)	***		UNI10*	-95.71	1	193.41	193.42	0	0.35		0.0005			Npar	Nzero	q01	q10
	Asteridae	present	present	1	present	1 (1-1)	***												mean	1	0.3	0.0004	0.0005
	Lamiidae	present	present	1	present	0.9999 (0.9998-1.0000)	***												95% lb	1	0	0.0000	0.0003
	Campanulidae	present	present	1	present	1 (0.9999-1.0000)	***												95% ub	1	1	0.0007	0.0007
	Superrosidae	present	present	1	present	1 (1-1)	***
	Rosidae	present	present	1	present	1 (0.9999-1.0000)	***
	Malvidae	present	present	1	present	1 (0.9999-1.0000)	***
	Fabidae	present	present	1	present	1 (0.9999-1.0000)	***
201_B. Number of perianth parts (3-state) (D2c)
	Angiospermae	six to ten (6-10) / more than ten (>10)	more than ten (>10)	1	more than ten (>10)	0.954 (0.833-1.000)	*		Summary of ML model comparisons														Summary of rjMCMC results
	Mesangiospermae	six to ten (6-10)	more than ten (>10)	1	more than ten (>10)	0.5604 (0.0522-1.0000)	*
	Magnoliidae	six to ten (6-10)	more than ten (>10)	0.9998	more than ten (>10)	0.9102 (0.8225-0.9999)	*		Model	LogL	Npar	AIC	AICc	DeltaAICc	w	q01	q02	q10	q12	q20	q21		Model_str	Model	NrSamples	PostProb
	Monocotyledoneae	six to ten (6-10)	six to ten (6-10)	0.6087	six to ten (6-10)	0.985 (0.9583-0.9983)	***		ARD	-326.44	6	664.88	664.98	2.2	0.25	0.0038	0.0003	0.0018	0.0004	0.0034	0.008		0 0 0 Z 0 0		39281	0.44
	Eudicotyledoneae	six to ten (6-10)	more than ten (>10)	0.9977	more than ten (>10)	0.452 (0.0849-0.9584)	*		ARDeq**	-325.34	6	662.68	662.79	0	0.74	0.0038	0.0003	0.0018	0.0004	0.0034	0.008		0 1 1 Z 0 0		26824	0.3
	Commelinidae	six to ten (6-10)	six to ten (6-10)	0.9999	six to ten (6-10)	0.9808 (0.9402-0.9997)	**		ER	-351.51	1	705.03	705.03	42.25	0	0.0013	0.0013	0.0013	0.0013	0.0013	0.0013		0 Z 1 1 0 0		6146	0.07
	Pentapetalae	six to ten (6-10)	six to ten (6-10)	0.9958	six to ten (6-10)	0.97 (0.9582-1.0000)	***		SYM	-340.6	3	687.2	687.23	24.44	0	0.002	0.0011	0.002	0.0006	0.0011	0.0006		0 0 0 Z 0 1		4981	0.06
	Superasteridae	six to ten (6-10)	six to ten (6-10)	0.9984	six to ten (6-10)	0.9574 (0.7708-1.0000)	**		SYMeq	-339.52	3	685.05	685.08	22.29	0	0.002	0.0011	0.002	0.0006	0.0011	0.0006		0 0 0 Z Z 0		2760	0.03
	Asteridae	six to ten (6-10)	six to ten (6-10)	1	six to ten (6-10)	0.991 (0.9701-1.0000)	***		ORD	-332.72	4	673.44	673.49	10.7	0	0.0039		0.0021	0.0005		0.0117
	Lamiidae	six to ten (6-10)	six to ten (6-10)	0.9999	six to ten (6-10)	0.9906 (0.9736-0.9994)	***		ORDeq	-331.62	4	671.24	671.29	8.5	0.01	0.0039		0.0021	0.0005		0.0117			Npar	Nzero	q01	q02	q10	q12	q20	q21
	Campanulidae	six to ten (6-10)	six to ten (6-10)	1	six to ten (6-10)	0.9881 (0.9592-0.9998)	***		ORDSYM	-342.95	2	689.9	689.92	27.13	0	0.002		0.002	0.0007		0.0007		mean	1.6	1	0.0039	0.0023	0.0024	0.0001	0.0039	0.0044
	Superrosidae	six to ten (6-10)	six to ten (6-10)	0.9992	six to ten (6-10)	0.968 (0.8841-0.9999)	**		ORDSYMeq	-341.89	2	687.78	687.79	25	0	0.002		0.002	0.0007		0.0007		95% lb	1	0	0.0018	0.0000	0.0010	0.000	0.0018	0.0020
	Rosidae	six to ten (6-10)	six to ten (6-10)	0.9994	six to ten (6-10)	0.934 (0.6013-0.9974)	**		ORDER	-352.31	1	706.62	706.62	43.83	0	0.0014		0.0014	0.0014		0.0014		95% ub	2	1	0.0071	0.0032	0.0032	0.001	0.0084	0.0088
	Malvidae	six to ten (6-10)	six to ten (6-10)	0.9999	six to ten (6-10)	0.9922 (0.9732-0.9998)	***
	Fabidae	six to ten (6-10)	six to ten (6-10)	0.9992	six to ten (6-10)	0.8605 (0.2315-0.9993)	*
201_C. Number of perianth parts (binary) (D2c)
	Angiospermae	more than six (>6)	more than six (>6)	1	more than six (>6)	0.9879 (0.916-1.000)	**		Summary of ML model comparisons										Summary of rjMCMC results
	Mesangiospermae	one to six (1-6)	more than six (>6)	1	more than six (>6)	0.8553 (0.1033-1.0000)	*
	Magnoliidae	one to six (1-6) / more than six (>6)	more than six (>6)	0.9998	more than six (>6)	0.9957 (0.9702-1.0000)	**		Model	LogL	Npar	AIC	AICc	DeltaAICc	w	q01	q10		Model_str	Model	NrSamples	PostProb
	Monocotyledoneae	one to six (1-6)	one to six (1-6)	0.813	one to six (1-6)	0.9979 (0.9963-0.9993)	***		ARD	-248.5	2	501	501.02	1.39	0.33	0.0006	0.0026		Z 0	UNI10	72521	0.81
	Eudicotyledoneae	one to six (1-6)	more than six (>6)	1	more than six (>6)	0.943 (0.6163-1.0000)	*		ARDeq**	-247.81	2	499.62	499.63	0	0.66	0.0006	0.0026		0 0	ER	15222	0.17
	Commelinidae	one to six (1-6)	one to six (1-6)	1	one to six (1-6)	0.9989 (0.9977-0.9998)	***		ER	-255.26	1	512.52	512.52	12.89	0	0.0021	0.0021		0 1	ARD	2257	0.03
	Pentapetalae	more than six (>6)	more than six (>6)	1	more than six (>6)	1 (1-1)	***		UNI01	-325.69	1	653.38	653.38	153.75	0	0.0082
	Superasteridae	more than six (>6)	more than six (>6)	1	more than six (>6)	0.9999 (0.9994-1.0000)	***		UNI10	-253.14	1	508.28	508.28	8.65	0.01		0.0029			Npar	Nzero	q01	q10
	Asteridae	more than six (>6)	more than six (>6)	1	more than six (>6)	0.9999 (0.9997-1.0000)	***												mean	1	0.8	0.0004	0.0028
	Lamiidae	more than six (>6)	more than six (>6)	1	more than six (>6)	0.9998 (0.9986-1.0000)	***												95% lb	1	0	0.0000	0.0019
	Campanulidae	more than six (>6)	more than six (>6)	1	more than six (>6)	0.9998 (0.9989-1.0000)	***												95% ub	1	1	0.0024	0.0036
	Superrosidae	more than six (>6)	more than six (>6)	1	more than six (>6)	1 (0.9997-1.0000)	***
	Rosidae	more than six (>6)	more than six (>6)	1	more than six (>6)	0.999 (0.9934-1.0000)	***
	Malvidae	more than six (>6)	more than six (>6)	1	more than six (>6)	0.9999 (0.9993-1.0000)	***
	Fabidae	more than six (>6)	more than six (>6)	1	more than six (>6)	0.9981 (0.9847-1.0000)	***
230_A. Perianth phyllotaxy (binary) (D2d)
	Angiospermae	whorled / spiral	spiral	1	whorled	0.706 (0-1)	*		Summary of ML model comparisons										Summary of rjMCMC results
	Mesangiospermae	whorled	spiral	1	whorled	0.7239 (0.0003-1.0000)	*
	Magnoliidae	whorled	spiral	1	whorled	0.7193 (0.0041-1.0000)	*		Model	LogL	Npar	AIC	AICc	DeltaAICc	w	q01	q10		Model_str	Model	NrSamples	PostProb
	Monocotyledoneae	whorled	spiral	0.6562	whorled	0.9901 (0.9505-1.0000)	*		ARD	-77.94	2	159.88	159.9	3.9	0.07	0.0004	0.0005		0 0	ER	51525	0.57
	Eudicotyledoneae	whorled	spiral	1	whorled	0.7252 (0.0022-1.0000)	*		ARDeq	-77.27	2	158.54	158.55	2.56	0.13	0.0004	0.0002		0 1	ARD	25581	0.28
	Commelinidae	whorled	whorled	0.9822	whorled	0.9914 (0.9547-1.0000)	***		ER	-77.94	1	157.88	157.89	1.89	0.18	0.0004	0.0004		0 Z	UNI01	12894	0.14
	Pentapetalae	whorled	spiral	1	whorled	0.9982 (0.9918-1.0000)	*		UNI01	-77.98	1	157.96	157.96	1.97	0.17	0.0004
	Superasteridae	whorled	spiral	1	whorled	0.9807 (0.8932-1.0000)	*		UNI10*	-76.99	1	155.99	155.99	0	0.46		0.0181			Npar	Nzero	q01	q10
	Asteridae	whorled	spiral	1	whorled	0.9979 (0.9891-1.0000)	*												mean	1.3	0.1	0.0004	0.0035
	Lamiidae	whorled	whorled	0.9696	whorled	0.9928 (0.9629-1.0000)	***												95% lb	1	0	0.0001	0.0000
	Campanulidae	whorled	whorled	0.8816	whorled	0.9934 (0.9647-1.0000)	***												95% ub	2	1	0.0006	0.0135
	Superrosidae	whorled	spiral	1	whorled	0.9941 (0.9677-1.0000)	*
	Rosidae	whorled	spiral	0.7194	whorled	0.9935 (0.9687-1.0000)	*
	Malvidae	whorled	whorled	0.9942	whorled	0.9923 (0.9593-1.0000)	***
	Fabidae	whorled	whorled	0.9945	whorled	0.9987 (0.9925-1.0000)	***
231_A. Number of perianth whorls (D2c)
	Angiospermae	more than two (>2)	more than two (>2)	1	more than two (>2)	0.9988 (0.9963-1.0000)	***		Summary of ML model comparisons														Summary of rjMCMC results
	Mesangiospermae	more than two (>2)	more than two (>2)	1	more than two (>2)	0.9945 (0.9866-0.9999)	***
	Magnoliidae	more than two (>2)	more than two (>2)	1	more than two (>2)	0.9905 (0.9808-0.9995)	***		Model	LogL	Npar	AIC	AICc	DeltaAICc	w	q01	q02	q10	q12	q20	q21		Model_str	Model	NrSamples	PostProb
	Monocotyledoneae	two (2)	two (2)	0.739	two (2)	0.9953 (0.9864-0.9993)	***		ARD	-270.99	6	553.97	554.08	2.2	0.25	0.0046	0.0002	0.0015	0.0001	0.0025	0.0039		0 0 0 Z 0 0		59316	0.66
	Eudicotyledoneae	more than two (>2)	more than two (>2)	0.9976	more than two (>2)	0.8236 (0.6590-0.9724)	**		ARDeq**	-269.89	6	551.77	551.88	0	0.75	0.0046	0.0002	0.0015	0.0001	0.0025	0.0039		0 1 1 Z 0 0		28129	0.31
	Commelinidae	two (2)	two (2)	1	two (2)	0.9977 (0.9924-1.0000)	***		ER	-312.34	1	626.68	626.69	74.81	0	0.001	0.001	0.001	0.001	0.001	0.001		0 1 1 Z 1 0		1745	0.02
	Pentapetalae	two (2)	two (2)	0.9998	two (2)	0.9996 (0.9987-1.0000)	***		SYM	-294.44	3	594.89	594.92	43.03	0	0.0018	0.0007	0.0018	0.0003	0.0007	0.0003		0 1 1 Z 0 1		389	0
	Superasteridae	two (2)	two (2)	0.9998	two (2)	0.9889 (0.9407-1.0000)	**		SYMeq	-293.48	3	592.95	592.98	41.1	0	0.0018	0.0007	0.0018	0.0003	0.0007	0.0003		0 1 2 Z 0 0		62	0
	Asteridae	two (2)	two (2)	0.9999	two (2)	0.9987 (0.9952-1.0000)	***		ORD	-278.36	4	564.71	564.77	12.88	0	0.0044		0.0017	0.0001		0.0063
	Lamiidae	two (2)	two (2)	0.9999	two (2)	0.9962 (0.9884-0.9997)	***		ORDeq	-277.26	4	562.52	562.57	10.69	0	0.0044		0.0017	0.0001		0.0063			Npar	Nzero	q01	q02	q10	q12	q20	q21
	Campanulidae	two (2)	two (2)	1	two (2)	0.9968 (0.9879-0.9999)	***		ORDSYM	-299.97	2	603.94	603.96	52.08	0	0.0019		0.0019	0.0004		0.0004		mean	1.3	1	0.0026	0.0017	0.0017	0	0.0025	0.0026
	Superrosidae	two (2)	two (2)	1	two (2)	0.9993 (0.9978-1.0000)	***		ORDSYMeq	-298.9	2	601.81	601.82	49.94	0	0.0019		0.0019	0.0004		0.0004		95% lb	1	1	0.0014	0.0011	0.0011	0	0.0013	0.0014
	Rosidae	two (2)	two (2)	1	two (2)	0.9938 (0.9831-0.9992)	***		ORDER	-314.93	1	631.85	631.86	79.98	0	0.0012		0.0012	0.0012		0.0012		95% ub	2	1	0.0049	0.0023	0.0023	0	0.0048	0.0048
	Malvidae	two (2)	two (2)	0.9999	two (2)	0.9977 (0.9918-0.9999)	***
	Fabidae	two (2)	two (2)	0.9978	two (2)	0.8846 (0.3996-0.9999)	*
232_A. Perianth merism (4-state) (D2c)
	Angiospermae	trimerous	trimerous	1	trimerous	0.9129 (0.8312-0.9950)	**		Summary of ML model comparisons																				Summary of rjMCMC results
	Mesangiospermae	trimerous	trimerous	1	trimerous	0.9211 (0.8193-1.0000)	**
	Magnoliidae	trimerous	trimerous	1	trimerous	0.9559 (0.9085-0.9960)	**		Model	LogL	Npar	AIC	AICc	DeltaAICc	w	q01	q02	q03	q10	q12	q13	q20	q21	q23	q30	q31	q32		Model_str	Model	NrSamples	PostProb
	Monocotyledoneae	trimerous	trimerous	1	trimerous	0.9965 (0.9933-0.9993)	***		ARD	-323.89	12	671.77	672.17	11.22	0	0	0.0005	0	0.0013	0.0006	0.0002	0.0005	0.0024	0.0036	0.0001	0	0.0027		0 0 0 0 Z Z 0 0 0 Z Z 0		45806	0.51
	Eudicotyledoneae	dimerous / trimerous	trimerous	0.9685	dimerous	0.6819 (0.1598-0.9948)	*		ARDeq	-322.55	12	669.09	669.49	8.54	0.01	0	0.0005	0	0.0013	0.0006	0.0003	0.0005	0.0024	0.0036	0.0001	0	0.0027		Z 0 0 0 Z Z 0 0 0 Z Z 0		28831	0.32
	Commelinidae	trimerous	trimerous	1	trimerous	0.9982 (0.9953-0.9999)	***		ER	-360.43	1	722.86	722.86	61.91	0	0.0008	0.0008	0.0008	0.0008	0.0008	0.0008	0.0008	0.0008	0.0008	0.0008	0.0008	0.0008		0 0 0 0 Z Z 0 0 Z Z Z 0		9265	0.1
	Pentapetalae	pentamerous	pentamerous	0.9997	pentamerous	0.9999 (0.9992-1.0000)	***		SYM	-325.81	6	663.61	663.72	2.76	0.2	0.0013	0.0004	0.0002	0.0013	0.0008	0.0002	0.0004	0.0008	0.0025	0.0002	0.0002	0.0025		Z 0 0 0 Z Z 0 0 Z Z Z 0		3226	0.04
	Superasteridae	pentamerous	pentamerous	1	pentamerous	0.9986 (0.9969-1.0000)	***		SYMeq**	-324.42	6	660.85	660.96	0	0.79	0.0013	0.0004	0.0002	0.0013	0.0008	0.0002	0.0004	0.0008	0.0025	0.0002	0.0002	0.0025		0 0 Z 0 Z Z 0 0 0 Z Z 0		1640	0.02
	Asteridae	pentamerous	pentamerous	1	pentamerous	0.9983 (0.9963-0.9999)	***		ORD	-336.79	6	685.59	685.7	24.74	0	0			0.002	0.0007			0.0042	0.0049			0.0029
	Lamiidae	pentamerous	pentamerous	1	pentamerous	0.9974 (0.9947-0.9996)	***		ORDeq	-335.83	6	683.65	683.76	22.8	0	0			0.002	0.0008			0.0038	0.0052			0.0029			Npar	Nzero	q01	q02	q03	q10	q12	q13	q20	q21	q23	q30	q31	q32
	Campanulidae	pentamerous	pentamerous	1	pentamerous	0.9972 (0.9939-0.9998)	***		ORDSYM	-344.4	3	694.8	694.83	33.87	0	0.002			0.002	0.0019			0.0019	0.0029			0.0029		mean	1	4.5	0.0016	0.0026	0.0025	0.0026	0	0	0.0026	0.0026	0.0022	0	0	0.0026
	Superrosidae	pentamerous	pentamerous	1	pentamerous	0.9998 (0.9995-1.0000)	***		ORDSYMeq	-343.03	3	692.05	692.08	31.12	0	0.002			0.002	0.0019			0.0019	0.0029			0.0029		95% lb	1	4	0.000	0.0020	0.0019	0.0020	0	0	0.0020	0.0020	0.000	0	0	0.0020
	Rosidae	pentamerous	pentamerous	1	pentamerous	0.998 (0.9965-0.9994)	***		ORDER	-345.99	1	693.97	693.98	33.02	0	0.0025			0.0025	0.0025			0.0025	0.0025			0.0025		95% ub	1	5	0.003	0.0031	0.0032	0.0031	0	0	0.0031	0.0031	0.003	0	0	0.0031
	Malvidae	pentamerous	pentamerous	1	pentamerous	0.9982 (0.9959-0.9999)	***
	Fabidae	pentamerous	pentamerous	1	pentamerous	0.9978 (0.9946-1.0000)	***
232_B. Perianth merism (3-state) (D2c)
	Angiospermae	trimerous	trimerous	1	trimerous	0.9014 (0.000-0.991)	*		Summary of ML model comparisons														Summary of rjMCMC results
	Mesangiospermae	trimerous	trimerous	1	trimerous	0.8927 (0.0000-0.9885)	*
	Magnoliidae	trimerous	trimerous	1	trimerous	0.9112 (0.000-0.995)	*		Model	LogL	Npar	AIC	AICc	DeltaAICc	w	q01	q02	q10	q12	q20	q21		Model_str	Model	NrSamples	PostProb
	Monocotyledoneae	trimerous	trimerous	1	trimerous	0.9188 (0.0000-0.9989)	*		ARD	-255.99	6	523.99	524.09	6.43	0.02	0.0007	0.0002	0.0023	0.003	0.0001	0.0027		0 Z 0 0 Z 0		81278	0.9
	Eudicotyledoneae	trimerous	trimerous	0.9794	pentamerous	0.588 (0.4333-1.0000)	*		ARDeq	-254.93	6	521.86	521.96	4.31	0.05	0.0007	0.0002	0.0023	0.0029	0.0001	0.0027		Z Z 0 Z Z 0		6758	0.08
	Commelinidae	trimerous	trimerous	1	trimerous	0.9989 (0.9974-0.9998)	***		ER	-281	1	564.01	564.01	46.35	0	0.0011	0.0011	0.0011	0.0011	0.0011	0.0011		0 0 1 0 Z 1		423	0
	Pentapetalae	pentamerous	pentamerous	0.9998	pentamerous	0.9999 (0.9996-1.0000)	***		SYM	-256.91	3	519.82	519.85	2.19	0.15	0.0009	0.0002	0.0009	0.0025	0.0002	0.0025		Z Z 0 0 Z 0		373	0
	Superasteridae	pentamerous	pentamerous	1	pentamerous	0.999 (0.9973-1.0000)	***		SYMeq*	-255.81	3	517.63	517.66	0	0.44	0.0009	0.0002	0.0009	0.0025	0.0002	0.0025		0 Z 1 1 Z 1		239	0
	Asteridae	pentamerous	pentamerous	1	pentamerous	0.9978 (0.9957-1.0000)	***		ORD	-256.76	4	521.51	521.57	3.91	0.06	0.0009		0.0026	0.0043		0.0027
	Lamiidae	pentamerous	pentamerous	1	pentamerous	0.9988 (0.9976-1.0000)	***		ORDeq	-255.84	4	519.68	519.73	2.07	0.16	0.001		0.0024	0.0044		0.0027			Npar	Nzero	q01	q02	q10	q12	q20	q21
	Campanulidae	pentamerous	pentamerous	1	pentamerous	0.998 (0.9959-1.0000)	***		ORDSYM	-259.56	2	523.12	523.14	5.48	0.03	0.0015		0.0015	0.0028		0.0028		mean	1	2.1	0.0022	0	0.0025	0.0022	0	0.0025
	Superrosidae	pentamerous	pentamerous	1	pentamerous	0.9999 (0.9998-1.0000)	***		ORDSYMeq	-258.49	2	520.98	520.99	3.34	0.08	0.0015		0.0015	0.0028		0.0028		95% lb	1	2	0.0000	0	0.0019	0.0000	0	0.0018
	Rosidae	pentamerous	pentamerous	1	pentamerous	0.9991 (0.9984-1.0000)	***		ORDER	-261.94	1	525.89	525.89	8.24	0.01	0.0023		0.0023	0.0023		0.0023		95% ub	1	4	0.0029	0	0.0033	0.0029	0	0.0032
	Malvidae	pentamerous	pentamerous	1	pentamerous	0.999 (0.9978-1.0000)	***
	Fabidae	pentamerous	pentamerous	1	pentamerous	0.9973 (0.9947-1.0000)	***
234_A. Perianth differentiation (binary) (D2d)
	Angiospermae	undifferentiated	undifferentiated	1	undifferentiated	0.9977 (0.9952-1.0000)	***		Summary of ML model comparisons										Summary of rjMCMC results
	Mesangiospermae	undifferentiated	undifferentiated	1	undifferentiated	0.9936 (0.9645-1.0000)	***
	Magnoliidae	undifferentiated / differentiated	undifferentiated	0.9999	undifferentiated	0.9812 (0.9195-1.0000)	*		Model	LogL	Npar	AIC	AICc	DeltaAICc	w	q01	q10		Model_str	Model	NrSamples	PostProb
	Monocotyledoneae	undifferentiated	undifferentiated	1	undifferentiated	0.9988 (0.9969-1.0000)	***		ARD	-199.76	2	403.52	403.54	1.39	0.33	0.0045	0.0015		0 1	ARD	61970	0.69
	Eudicotyledoneae	undifferentiated	undifferentiated	0.9918	undifferentiated	0.6328 (0.0876-1.0000)	*		ARDeq**	-199.07	2	402.14	402.15	0	0.67	0.0045	0.0015		0 0	ER	18130	0.2
	Commelinidae	undifferentiated	undifferentiated	0.9999	undifferentiated	0.9767 (0.8813-1.0000)	**		ER	-208.79	1	419.59	419.59	17.44	0	0.0025	0.0025		0 Z	UNI01	9900	0.11
	Pentapetalae	differentiated	differentiated	0.9471	differentiated	0.8647 (0-1)	*		UNI01	-228.44	1	458.88	458.88	56.73	0	0.0088
	Superasteridae	differentiated	differentiated	0.9488	differentiated	0.7837 (0.000-0.999)	*		UNI10	-233.4	1	468.79	468.8	66.64	0		0.0034			Npar	Nzero	q01	q10
	Asteridae	differentiated	differentiated	0.9985	differentiated	0.8894 (0.0000-0.9999)	*												mean	1.7	0.1	0.0046	0.0015
	Lamiidae	differentiated	differentiated	0.9999	differentiated	0.8862 (0.0000-0.9991)	*												95% lb	1	0	0.0020	0.0000
	Campanulidae	differentiated	differentiated	1	differentiated	0.8878 (0.0000-0.9996)	*												95% ub	2	1	0.0082	0.0028
	Superrosidae	differentiated	differentiated	0.9908	differentiated	0.8715 (0.0000-0.9999)	*
	Rosidae	differentiated	differentiated	0.9944	differentiated	0.858 (0.0000-0.9985)	*
	Malvidae	differentiated	differentiated	0.9989	differentiated	0.864 (0.0000-0.9962)	*
	Fabidae	differentiated	differentiated	0.9883	undifferentiated	0.6347 (0.0463-1.0000)	*
204_A. Fusion of perianth (D2c)
	Angiospermae	free (<5%)	free (<5%)	1	free (<5%)	0.9964 (0.9789-0.9999)	***		Summary of ML model comparisons										Summary of rjMCMC results
	Mesangiospermae	free (<5%)	free (<5%)	1	free (<5%)	0.9999 (0.9998-1.0000)	***
	Magnoliidae	free (<5%)	free (<5%)	0.9999	free (<5%)	0.9853 (0.9696-0.9971)	***		Model	LogL	Npar	AIC	AICc	DeltaAICc	w	q01	q10		Model_str	Model	NrSamples	PostProb
	Monocotyledoneae	free (<5%)	free (<5%)	0.9999	free (<5%)	0.9936 (0.9885-0.9976)	***		ARD	-224.59	2	453.17	453.19	1.38	0.2	0.0043	0.0035		0 0	ER	89969	1
	Eudicotyledoneae	free (<5%)	free (<5%)	1	free (<5%)	0.9989 (0.9975-0.9999)	***		ARDeq*	-223.89	2	451.79	451.8	0	0.4	0.0043	0.0035		0 1	ARD	31	0
	Commelinidae	free (<5%)	free (<5%)	0.999	free (<5%)	0.8985 (0.8510-0.9436)	**		ER	-224.91	1	451.83	451.83	0.03	0.4	0.0042	0.0042
	Pentapetalae	free (<5%)	free (<5%)	0.9993	free (<5%)	0.8745 (0.7854-0.9446)	**		UNI01	-236.67	1	475.33	475.34	23.54	0	0.0048				Npar	Nzero	q01	q10
	Superasteridae	free (<5%)	free (<5%)	0.9904	fused (>5%)	0.5994 (0.0790-0.8823)	*		UNI10	-236.12	1	474.23	474.24	22.44	0		0.0081		mean	1	0	0.0043	0.0043
	Asteridae	free (<5%)	free (<5%)	0.8253	fused (>5%)	0.9052 (0.8450-0.9661)	*												95% lb	1	0	0.0032	0.0032
	Lamiidae	free (<5%) / fused (>5%)	fused (>5%)	0.9686	fused (>5%)	0.9701 (0.9448-0.9906)	*												95% ub	1	0	0.0055	0.0055
	Campanulidae	fused (>5%)	fused (>5%)	0.9546	fused (>5%)	0.9841 (0.9653-0.9969)	***
	Superrosidae	free (<5%)	free (<5%)	0.9994	free (<5%)	0.9645 (0.9451-0.9826)	**
	Rosidae	free (<5%)	free (<5%)	0.9994	free (<5%)	0.9645 (0.9520-0.9778)	***
	Malvidae	free (<5%)	free (<5%)	0.9991	free (<5%)	0.9569 (0.9245-0.9846)	**
	Fabidae	free (<5%)	free (<5%)	1	free (<5%)	0.9897 (0.9796-0.9977)	***
207_A. Symmetry of perianth (binary) (D2d)
	Angiospermae	actinomorphic	actinomorphic	1	actinomorphic	0.995 (0.9773-1.0000)	***		Summary of ML model comparisons										Summary of rjMCMC results
	Mesangiospermae	actinomorphic	actinomorphic	1	actinomorphic	0.9986 (0.9992-1.0000)	***
	Magnoliidae	actinomorphic	actinomorphic	1	actinomorphic	0.9924 (0.9708-1.0000)	***		Model	LogL	Npar	AIC	AICc	DeltaAICc	w	q01	q10		Model_str	Model	NrSamples	PostProb
	Monocotyledoneae	actinomorphic	actinomorphic	0.9997	actinomorphic	0.9448 (0.8787-0.9921)	**		ARD	-210.77	2	425.53	425.55	1.38	0.33	0.0014	0.0062		0 1	ARD	57660	0.64
	Eudicotyledoneae	actinomorphic	actinomorphic	1	actinomorphic	0.9939 (0.9812-1.0000)	***		ARDeq**	-210.08	2	424.15	424.17	0	0.67	0.0014	0.0062		0 0	ER	32340	0.36
	Commelinidae	actinomorphic	actinomorphic	0.9974	actinomorphic	0.7942 (0.3830-0.9984)	*		ER	-219.85	1	441.71	441.71	17.55	0	0.0015	0.0015
	Pentapetalae	actinomorphic	actinomorphic	1	actinomorphic	0.9985 (0.9982-1.0000)	***		UNI01	-267.95	1	537.91	537.91	113.75	0	0.0019				Npar	Nzero	q01	q10
	Superasteridae	actinomorphic	actinomorphic	1	actinomorphic	0.996 (0.9896-1.0000)	***		UNI10	-217.33	1	436.66	436.67	12.5	0		0.0167		mean	1.6	0	0.0015	0.0046
	Asteridae	actinomorphic	actinomorphic	1	actinomorphic	0.9973 (0.9944-1.0000)	***												95% lb	1	0	0.001	0.0010
	Lamiidae	actinomorphic	actinomorphic	0.996	actinomorphic	0.8859 (0.6231-0.9999)	**												95% ub	2	0	0.002	0.0089
	Campanulidae	actinomorphic	actinomorphic	1	actinomorphic	0.9861 (0.9449-1.0000)	**
	Superrosidae	actinomorphic	actinomorphic	1	actinomorphic	0.9969 (0.9947-1.0000)	***
	Rosidae	actinomorphic	actinomorphic	1	actinomorphic	0.9857 (0.9609-0.9998)	***
	Malvidae	actinomorphic	actinomorphic	0.9997	actinomorphic	0.9597 (0.8089-1.0000)	**
	Fabidae	actinomorphic	actinomorphic	1	actinomorphic	0.9744 (0.8966-1.0000)	**
301_B. Number of fertile stamens (3-state) (D2c)
	Angiospermae	more than ten (>10)	more than ten (>10)	1	more than ten (>10)	0.7921 (0.104-1.000)	*		Summary of ML model comparisons														Summary of rjMCMC results
	Mesangiospermae	one to five (1-5) / more than ten (>10)	more than ten (>10)	1	more than ten (>10)	0.7642 (0.0008-1.0000)	*
	Magnoliidae	more than ten (>10)	more than ten (>10)	0.9999	more than ten (>10)	0.8974 (0.5384-1.0000)	**		Model	LogL	Npar	AIC	AICc	DeltaAICc	w	q01	q02	q10	q12	q20	q21		Model_str	Model	NrSamples	PostProb
	Monocotyledoneae	six to ten (6-10)	six to ten (6-10)	0.58	six to ten (6-10)	0.99 (0.9797-0.9965)	***		ARD	-491.73	6	995.45	995.56	2.2	0.25	0.0004	0.0003	0.0046	0.0008	0.0045	0.0086		0 0 1 0 1 1		28758	0.32
	Eudicotyledoneae	one to five (1-5)	more than ten (>10)	1	more than ten (>10)	0.7671 (0.0098-1.0000)	*		ARDeq**	-490.63	6	993.25	993.36	0	0.75	0.0004	0.0003	0.0046	0.0008	0.0045	0.0086		0 Z 0 0 1 1		18759	0.21
	Commelinidae	six to ten (6-10)	six to ten (6-10)	0.9997	six to ten (6-10)	0.8828 (0.3658-0.9986)	*		ER	-536.12	1	1074.24	1074.25	80.89	0	0.0027	0.0027	0.0027	0.0027	0.0027	0.0027		0 0 1 1 1 1		13845	0.15
	Pentapetalae	six to ten (6-10)	more than ten (>10)	1	more than ten (>10)	0.7644 (0.0005-1.0000)	*		SYM	-528.65	3	1063.3	1063.33	69.97	0	0.0038	0.0006	0.0038	0.0039	0.0006	0.0039		0 0 1 0 1 2		5724	0.06
	Superasteridae	six to ten (6-10)	more than ten (>10)	1	more than ten (>10)	0.7756 (0.0411-1.0000)	*		SYMeq	-527.8	3	1061.59	1061.62	68.26	0	0.0038	0.0006	0.0038	0.0039	0.0006	0.0039		0 Z 1 1 1 1		5515	0.06
	Asteridae	one to five (1-5) / six to ten (6-10)	more than ten (>10)	0.9993	more than ten (>10)	0.8969 (0.6100-0.9999)	*		ORD	-507.58	4	1023.16	1023.21	29.85	0	0.0008		0.006	0.0042		0.0073
	Lamiidae	one to five (1-5)	one to five (1-5)	0.9995	one to five (1-5)	0.9882 (0.9780-0.9972)	***		ORDeq	-507	4	1022	1022.05	28.69	0	0.0008		0.006	0.0043		0.0071			Npar	Nzero	q01	q02	q10	q12	q20	q21
	Campanulidae	one to five (1-5)	one to five (1-5)	0.9968	one to five (1-5)	0.9892 (0.9750-0.9989)	***		ORDSYM	-531.31	2	1066.62	1066.64	73.27	0	0.0042		0.0042	0.0045		0.0045		mean	2.1	0.5	0.0008	0.0004	0.0044	0.0017	0.0055	0.006
	Superrosidae	six to ten (6-10)	more than ten (>10)	1	more than ten (>10)	0.7606 (0.004-1.000)	*		ORDSYMeq	-530.41	2	1064.81	1064.83	71.46	0	0.0042		0.0042	0.0045		0.0045		95% lb	2	0	0.0000	0.0000	0.0014	0.0000	0.0038	0.0038
	Rosidae	six to ten (6-10)	more than ten (>10)	0.9999	more than ten (>10)	0.7326 (0.0067-0.9981)	*		ORDER	-531.35	1	1064.71	1064.71	71.35	0	0.0043		0.0043	0.0043		0.0043		95% ub	3	1	0.0021	0.0009	0.0063	0.0047	0.0074	0.0091
	Malvidae	six to ten (6-10)	more than ten (>10)	0.9154	six to ten (6-10)	0.7329 (0.0402-0.9959)	*
	Fabidae	six to ten (6-10)	more than ten (>10)	1	more than ten (>10)	0.7656 (0.0054-1.0000)	*
301_C. Number of fertile stamens (binary) (D2c)
	Angiospermae	more than six (>6)	more than six (>6)	1	more than six (>6)	1 (1-1)	***		Summary of ML model comparisons										Summary of rjMCMC results
	Mesangiospermae	one to six (1-6)	more than six (>6)	1	more than six (>6)	0.9919 (0.9656-1.0000)	**
	Magnoliidae	one to six (1-6) / more than six (>6)	more than six (>6)	1	more than six (>6)	0.9999 (0.9995-1.0000)	**		Model	LogL	Npar	AIC	AICc	DeltaAICc	w	q01	q10		Model_str	Model	NrSamples	PostProb
	Monocotyledoneae	one to six (1-6)	one to six (1-6)	0.5065	one to six (1-6)	0.9782 (0.9497-0.9953)	**		ARD	-288.64	2	581.28	581.3	1.39	0.33	0.0005	0.0058		0 1	ARD	90000	1
	Eudicotyledoneae	one to six (1-6)	more than six (>6)	0.9999	more than six (>6)	0.9913 (0.9642-1.0000)	**		ARDeq**	-287.95	2	579.9	579.91	0	0.67	0.0005	0.0058
	Commelinidae	one to six (1-6)	one to six (1-6)	1	one to six (1-6)	0.9888 (0.9768-0.9972)	***		ER	-322.91	1	647.82	647.82	67.91	0	0.0031	0.0031			Npar	Nzero	q01	q10
	Pentapetalae	more than six (>6)	more than six (>6)	1	more than six (>6)	1 (1-1)	***		UNI01	-361.93	1	725.86	725.87	145.96	0	0.0046			mean	2	0	0.0006	0.0059
	Superasteridae	more than six (>6)	more than six (>6)	1	more than six (>6)	0.9999 (0.9997-1.0000)	***		UNI10	-325.72	1	653.45	653.45	73.54	0		0.0073		95% lb	2	0	0.0002	0.0047
	Asteridae	more than six (>6)	more than six (>6)	0.9999	more than six (>6)	0.9963 (0.9886-1.0000)	***												95% ub	2	0	0.0011	0.0070
	Lamiidae	one to six (1-6)	one to six (1-6)	0.999	one to six (1-6)	0.9928 (0.9872-0.9982)	***
	Campanulidae	one to six (1-6)	one to six (1-6)	0.9944	one to six (1-6)	0.9933 (0.987-0.999)	***
	Superrosidae	more than six (>6)	more than six (>6)	1	more than six (>6)	1 (0.9999-1.0000)	***
	Rosidae	more than six (>6)	more than six (>6)	1	more than six (>6)	0.9964 (0.9926-0.9992)	***
	Malvidae	more than six (>6)	more than six (>6)	1	more than six (>6)	0.9997 (0.9991-1.0000)	***
	Fabidae	more than six (>6)	more than six (>6)	1	more than six (>6)	1 (0.9998-1.0000)	***
330_A. Androecium structural phyllotaxy (binary) (D2d)
	Angiospermae	whorled / spiral	spiral	1	whorled	0.9378 (0.2501-1.0000)	*		Summary of ML model comparisons										Summary of rjMCMC results
	Mesangiospermae	whorled	spiral	0.999	whorled	0.9656 (0.9965-1.0000)	*
	Magnoliidae	whorled	spiral	0.9982	whorled	0.912 (0.0682-1.0000)	*		Model	LogL	Npar	AIC	AICc	DeltaAICc	w	q01	q10		Model_str	Model	NrSamples	PostProb
	Monocotyledoneae	whorled	whorled	0.5917	whorled	0.9989 (0.9967-1.0000)	***		ARD	-55.47	2	114.94	114.96	1.39	0.33	0.0001	0.0086		0 0	ER	65195	0.72
	Eudicotyledoneae	whorled	spiral	0.9786	whorled	0.9768 (0.9973-1.0000)	*		ARDeq**	-54.78	2	113.55	113.57	0	0.66	0.0001	0.0086		0 Z	UNI01	20047	0.22
	Commelinidae	whorled	whorled	0.9997	whorled	0.9983 (0.9968-1.0000)	***		ER	-60.92	1	123.84	123.85	10.28	0	0.0004	0.0004		0 1	ARD	4758	0.05
	Pentapetalae	whorled	whorled	0.9979	whorled	0.9999 (1-1)	***		UNI01	-60.72	1	123.45	123.45	9.88	0	0.0004
	Superasteridae	whorled	whorled	0.9992	whorled	0.9995 (0.9994-1.0000)	***		UNI10	-1000000	1	2000002	2e+06	1.99989e+06	0		0.0004			Npar	Nzero	q01	q10
	Asteridae	whorled	whorled	1	whorled	0.9997 (0.9996-1.0000)	***												mean	1.1	0.2	0.0004	0.0008
	Lamiidae	whorled	whorled	1	whorled	0.9992 (0.9977-1.0000)	***												95% lb	1	0	0.0002	0.0000
	Campanulidae	whorled	whorled	1	whorled	0.9993 (0.9988-1.0000)	***												95% ub	2	1	0.0007	0.0038
	Superrosidae	whorled	whorled	0.9996	whorled	0.9998 (0.9997-1.0000)	***
	Rosidae	whorled	whorled	0.9998	whorled	0.9991 (0.9964-1.0000)	***
	Malvidae	whorled	whorled	1	whorled	0.9991 (0.9984-1.0000)	***
	Fabidae	whorled	whorled	1	whorled	0.9998 (0.9998-1.0000)	***
331_A. Number of androecium structural whorls (3-state) (D2c)
	Angiospermae	more than two (>2)	more than two (>2)	0.9965	two (2)	0.5189 (0.0009-1.0000)	*		Summary of ML model comparisons														Summary of rjMCMC results
	Mesangiospermae	more than two (>2)	more than two (>2)	0.9961	two (2)	0.6499 (0.0119-1.0000)	*
	Magnoliidae	more than two (>2)	more than two (>2)	0.9963	more than two (>2)	0.6979 (0.0000-0.9968)	*		Model	LogL	Npar	AIC	AICc	DeltaAICc	w	q01	q02	q10	q12	q20	q21		Model_str	Model	NrSamples	PostProb
	Monocotyledoneae	two (2)	more than two (>2)	0.9638	two (2)	0.8966 (0.604-1.000)	*		ARD*	-231.02	6	474.03	474.14	0	0.39	0	0.0001	0.0066	0.0006	0	0.0116		Z Z 0 1 1 0		14921	0.17
	Eudicotyledoneae	more than two (>2)	more than two (>2)	0.907	two (2)	0.8999 (0.6307-1.0000)	*		ARDeq	-231.52	6	475.04	475.15	1.01	0.24	0	0.0001	0.0061	0.0008	0	0.0019		Z Z 0 1 Z 0		13273	0.15
	Commelinidae	two (2)	two (2)	0.8976	two (2)	0.9825 (0.9505-1.0000)	***		ER	-280.88	1	563.75	563.76	89.62	0	0.0017	0.0017	0.0017	0.0017	0.0017	0.0017		Z 0 1 0 0 1		7540	0.08
	Pentapetalae	one (1)	two (2)	0.9928	two (2)	0.9982 (0.9975-1.0000)	**		SYM	-254.86	3	515.72	515.75	41.61	0	0.0035	0.0001	0.0035	0.0011	0.0001	0.0011		Z 0 Z 1 2 Z		6904	0.08
	Superasteridae	one (1)	two (2)	0.9962	two (2)	0.9909 (0.9793-1.0000)	**		SYMeq	-253.8	3	513.61	513.64	39.5	0	0.0035	0.0001	0.0035	0.0012	0.0001	0.0012		Z 0 1 0 Z 1		6406	0.07
	Asteridae	one (1)	two (2)	0.9998	two (2)	0.9843 (0.9447-1.0000)	*		ORD	-234.46	4	476.91	476.96	2.82	0.1	0		0.0063	0.0009		0.0025
	Lamiidae	one (1)	one (1)	0.9986	one (1)	0.9274 (0.4977-0.9974)	*		ORDeq	-233.41	4	474.81	474.86	0.72	0.27	0		0.0063	0.0009		0.0022			Npar	Nzero	q01	q02	q10	q12	q20	q21
	Campanulidae	one (1)	one (1)	0.9924	one (1)	0.9311 (0.4985-0.9984)	*		ORDSYM	-255.25	2	514.49	514.51	40.37	0	0.0036		0.0036	0.0013		0.0013		mean	2.1	2.2	0	0.0187	0.0058	0.0016	0.2896	0.0049
	Superrosidae	one (1)	two (2)	0.998	two (2)	0.998 (0.9964-1.0000)	**		ORDSYMeq	-254.17	2	512.35	512.36	38.22	0	0.0036		0.0036	0.0013		0.0013		95% lb	2	1	0.0000	0.000	0.0000	0.0001	0.0000	0.0000
	Rosidae	one (1)	two (2)	0.9987	two (2)	0.9925 (0.9835-1.0000)	**		ORDER	-260.53	1	523.05	523.06	48.92	0	0.0028		0.0028	0.0028		0.0028		95% ub	3	3	0.0004	0.172	0.0081	0.0073	2.8058	0.0082
	Malvidae	one (1) / two (2)	two (2)	0.9994	two (2)	0.987 (0.9586-1.0000)	**
	Fabidae	one (1)	two (2)	1	two (2)	0.9952 (0.9887-1.0000)	**
332_A. Androecium structural merism (4-state) (D2c)
	Angiospermae	trimerous / pentamerous	trimerous	1	trimerous	0.8353 (0.1856-0.9993)	*		Summary of ML model comparisons																				Summary of rjMCMC results
	Mesangiospermae	trimerous / pentamerous	trimerous	0.9993	trimerous	0.8502 (0.1793-1.0000)	*
	Magnoliidae	trimerous	trimerous	1	trimerous	0.843 (0.6559-0.9999)	**		Model	LogL	Npar	AIC	AICc	DeltaAICc	w	q01	q02	q03	q10	q12	q13	q20	q21	q23	q30	q31	q32		Model_str	Model	NrSamples	PostProb
	Monocotyledoneae	trimerous	trimerous	1	trimerous	0.8327 (0.0853-1.0000)	*		ARD	-223.12	12	470.25	470.65	10.88	0	0.0072	0	0	0.0005	0.0005	0.0004	0	0.0003	0.0031	0.0007	0.0003	0.0021		0 1 1 1 1 Z 1 1 0 1 Z 1		3240	0.04
	Eudicotyledoneae	trimerous / pentamerous	trimerous	0.8545	tetramerous	0.8544 (0.3312-0.9985)	*		ARDeq	-221.81	12	467.61	468.01	8.25	0.01	0.0071	0	0	0.0005	0.0005	0.0004	0	0.0003	0.0031	0.0007	0.0003	0.0021		0 1 1 1 1 Z 1 Z 0 1 Z 1		2921	0.03
	Commelinidae	trimerous	trimerous	1	trimerous	0.9342 (0.8188-1.0000)	**		ER	-237.53	1	477.06	477.06	17.3	0	0.0009	0.0009	0.0009	0.0009	0.0009	0.0009	0.0009	0.0009	0.0009	0.0009	0.0009	0.0009		0 Z Z Z 0 Z 0 0 0 Z Z 0		2511	0.03
	Pentapetalae	pentamerous	pentamerous	1	tetramerous	0.8206 (0-1)	*		SYM	-225.16	6	462.31	462.42	2.65	0.21	0.0006	0	0.0005	0.0006	0.0004	0.0005	0	0.0004	0.0021	0.0005	0.0005	0.0021		0 1 1 1 1 Z 1 Z 0 1 1 1		2110	0.02
	Superasteridae	pentamerous	pentamerous	1	tetramerous	0.8183 (0.0007-1.0000)	*		SYMeq**	-223.83	6	459.66	459.77	0	0.78	0.0006	0	0.0005	0.0006	0.0004	0.0005	0	0.0004	0.0021	0.0005	0.0005	0.0021		0 1 1 1 1 Z 1 1 0 1 1 1		2068	0.02
	Asteridae	pentamerous	pentamerous	0.9996	tetramerous	0.8156 (0.0123-1.0000)	*		ORD	-237.28	6	486.56	486.67	26.9	0	100			17.7535	0			0.0103	0.0043			0.0031
	Lamiidae	pentamerous	pentamerous	1	tetramerous	0.6807 (0.002-1.000)	*		ORDeq	-235.92	6	483.84	483.94	24.18	0	100			17.7534	0			0.0103	0.0043			0.0031			Npar	Nzero	q01	q02	q03	q10	q12	q13	q20	q21	q23	q30	q31	q32
	Campanulidae	pentamerous	pentamerous	1	pentamerous	0.593 (0.0000-0.9989)	*		ORDSYM	-259.11	3	524.22	524.25	64.49	0	0.0021			0.0021	0.0031			0.0031	0.0034			0.0034		mean	1.9	3.4	0.0084	0.0013	0.001	0.0006	0.001	0.0001	0.0011	0.0007	0.0122	0.0006	0.0003	0.0009
	Superrosidae	pentamerous	pentamerous	1	tetramerous	0.8018 (0.0001-1.0000)	*		ORDSYMeq	-257.87	3	521.75	521.78	62.01	0	0.0021			0.0021	0.0031			0.0031	0.0034			0.0034		95% lb	1	1	0.000	0.0000	0.0000	0.0000	0.0003	0.0000	0.0000	0.0000	0.0022	0.0000	0.0000	0.0000
	Rosidae	pentamerous	pentamerous	1	tetramerous	0.7128 (0.001-1.000)	*		ORDER	-259.98	1	521.96	521.96	62.2	0	0.0031			0.0031	0.0031			0.0031	0.0031			0.0031		95% ub	2	6	0.017	0.0106	0.0035	0.0011	0.0035	0.0007	0.0034	0.0033	0.0188	0.0011	0.0008	0.0033
	Malvidae	pentamerous	pentamerous	1	pentamerous	0.901 (0.7945-1.0000)	**
	Fabidae	pentamerous	pentamerous	1	pentamerous	0.6046 (0.0049-1.0000)	*
332_B. Androecium structural merism (3-state) (D2c)
	Angiospermae	trimerous / tetramerous / pentamerous	trimerous	1	pentamerous	1 (1-1)	*		Summary of ML model comparisons														Summary of rjMCMC results
	Mesangiospermae	trimerous / tetramerous / pentamerous	trimerous	0.9992	pentamerous	1 (1-1)	*
	Magnoliidae	trimerous	trimerous	1	tetramerous	0.9005 (0.8459-0.9491)	*		Model	LogL	Npar	AIC	AICc	DeltaAICc	w	q01	q02	q10	q12	q20	q21		Model_str	Model	NrSamples	PostProb
	Monocotyledoneae	trimerous	trimerous	1	trimerous	0.9973 (0.9952-0.9991)	***		ARD	-177.13	6	366.27	366.37	7.81	0.01	0.0005	0.0004	0.0001	0.0032	0.0006	0.0022		Z Z 0 Z Z 0		90000	1
	Eudicotyledoneae	trimerous / tetramerous / pentamerous	trimerous	0.8461	pentamerous	1 (1-1)	*		ARDeq	-176.12	6	364.25	364.36	5.79	0.04	0.0005	0.0004	0.0001	0.0033	0.0006	0.0022
	Commelinidae	trimerous	trimerous	1	trimerous	0.9976 (0.9956-0.9995)	***		ER	-186.29	1	374.58	374.58	16.02	0	0.0011	0.0011	0.0011	0.0011	0.0011	0.0011			Npar	Nzero	q01	q02	q10	q12	q20	q21
	Pentapetalae	pentamerous	pentamerous	0.9999	pentamerous	1 (1-1)	***		SYM	-177.31	3	360.62	360.65	2.08	0.22	0.0005	0.0006	0.0005	0.0022	0.0006	0.0022		mean	1	4	0	0	0.0027	0	0	0.0027
	Superasteridae	pentamerous	pentamerous	1	pentamerous	1 (1-1)	***		SYMeq**	-176.27	3	358.54	358.57	0	0.64	0.0005	0.0006	0.0005	0.0022	0.0006	0.0022		95% lb	1	4	0	0	0.0017	0	0	0.0017
	Asteridae	pentamerous	pentamerous	0.9996	pentamerous	1 (1-1)	***		ORD	-178.44	4	364.88	364.93	6.36	0.03	0.0005		0.0065	0.0049		0.003		95% ub	1	4	0	0	0.0034	0	0	0.0034
	Lamiidae	pentamerous	pentamerous	0.9999	pentamerous	1 (1-1)	***		ORDeq	-177.56	4	363.12	363.17	4.6	0.06	0.0003		0.0073	0.0039		0.0029
	Campanulidae	pentamerous	pentamerous	1	pentamerous	1 (1-1)	***		ORDSYM	-186.2	2	376.4	376.42	17.85	0	0.002		0.002	0.003		0.003
	Superrosidae	pentamerous	pentamerous	1	pentamerous	1 (1-1)	***		ORDSYMeq	-185.23	2	374.45	374.47	15.9	0	0.002		0.002	0.003		0.003
	Rosidae	pentamerous	pentamerous	1	pentamerous	1 (1-1)	***		ORDER	-186.98	1	375.96	375.97	17.4	0	0.0027		0.0027	0.0027		0.0027
	Malvidae	pentamerous	pentamerous	1	pentamerous	1 (1-1)	***
	Fabidae	pentamerous	pentamerous	1	pentamerous	1 (1-1)	***
305_A. Filament (binary) (D2d)
	Angiospermae	laminar (wide) / typical (narrow)	laminar (wide)	1	typical (narrow)	0.8019 (0.0078-0.9882)	*		Summary of ML model comparisons										Summary of rjMCMC results
	Mesangiospermae	laminar (wide) / typical (narrow)	laminar (wide)	0.9923	typical (narrow)	0.8653 (0.1022-0.9994)	*
	Magnoliidae	laminar (wide)	laminar (wide)	0.9985	laminar (wide)	0.9527 (0.9024-1.0000)	**		Model	LogL	Npar	AIC	AICc	DeltaAICc	w	q01	q10		Model_str	Model	NrSamples	PostProb
	Monocotyledoneae	typical (narrow)	laminar (wide)	0.8479	typical (narrow)	0.9604 (0.7213-0.9997)	*		ARD	-172.3	2	348.59	348.61	1.28	0.34	0.0088	0.0021		0 0	ER	72603	0.81
	Eudicotyledoneae	typical (narrow)	typical (narrow)	0.6209	typical (narrow)	0.9913 (0.9542-1.0000)	***		ARDeq**	-171.66	2	347.31	347.33	0	0.65	0.009	0.0021		0 1	ARD	17395	0.19
	Commelinidae	laminar (wide) / typical (narrow)	laminar (wide)	0.6586	typical (narrow)	0.709 (0.2191-0.8947)	*		ER	-177.98	1	357.95	357.96	10.63	0	0.0024	0.0024		Z 0	UNI10	2	0
	Pentapetalae	typical (narrow)	typical (narrow)	0.9989	typical (narrow)	0.9973 (0.998-1.000)	***		UNI01	-183.97	1	369.94	369.95	22.62	0	0.0146
	Superasteridae	typical (narrow)	typical (narrow)	0.9994	typical (narrow)	0.9932 (0.9735-1.0000)	***		UNI10	-187.51	1	377.02	377.03	29.7	0		0.0023			Npar	Nzero	q01	q10
	Asteridae	typical (narrow)	typical (narrow)	0.9996	typical (narrow)	0.9911 (0.9613-1.0000)	***												mean	1.2	0	0.0038	0.0024
	Lamiidae	typical (narrow)	typical (narrow)	0.9973	typical (narrow)	0.9717 (0.8147-1.0000)	**												95% lb	1	0	0.0016	0.0017
	Campanulidae	typical (narrow)	typical (narrow)	0.9954	typical (narrow)	0.9204 (0.6359-0.9959)	**												95% ub	2	0	0.0108	0.0032
	Superrosidae	typical (narrow)	typical (narrow)	0.9994	typical (narrow)	0.9943 (0.9782-1.0000)	***
	Rosidae	typical (narrow)	typical (narrow)	0.9996	typical (narrow)	0.9929 (0.9753-0.9997)	***
	Malvidae	typical (narrow)	typical (narrow)	0.9973	typical (narrow)	0.9707 (0.8301-0.9994)	**
	Fabidae	typical (narrow)	typical (narrow)	1	typical (narrow)	0.989 (0.9693-1.0000)	***
311_A. Anther orientation (D2d)
	Angiospermae	introrse	introrse	1	introrse	0.9572 (0.8759-1.0000)	**		Summary of ML model comparisons														Summary of rjMCMC results
	Mesangiospermae	introrse / extrorse	introrse	0.9984	introrse	0.7815 (0.4853-1.0000)	*
	Magnoliidae	extrorse	extrorse	0.6989	extrorse	0.9446 (0.5782-0.9999)	**		Model	LogL	Npar	AIC	AICc	DeltaAICc	w	q01	q02	q10	q12	q20	q21		Model_str	Model	NrSamples	PostProb
	Monocotyledoneae	introrse	introrse	0.9976	introrse	0.9824 (0.9658-0.9981)	***		ARD	-345.14	6	702.29	702.4	3.74	0.06	0.0022	0.0025	0.0148	0.0026	0.0015	0.0027		0 0 0 Z 0 0		32086	0.36
	Eudicotyledoneae	introrse / extrorse	introrse	0.997	introrse	0.9319 (0.8732-1.0000)	*		ARDeq	-344.04	6	700.08	700.19	1.54	0.18	0.0037	0.0031	0.0122	0	0.0019	0.0022		0 0 0 Z 0 Z		15469	0.17
	Commelinidae	introrse	introrse	0.9959	introrse	0.8763 (0.7371-1.0000)	**		ER	-348.75	1	699.49	699.5	0.85	0.25	0.0027	0.0027	0.0027	0.0027	0.0027	0.0027		0 0 0 0 0 0		13317	0.15
	Pentapetalae	introrse	introrse	1	introrse	0.9995 (0.997-1.000)	***		SYM	-347.37	3	700.74	700.77	2.12	0.13	0.0031	0.0028	0.0031	0.0012	0.0028	0.0012		0 0 Z Z 0 0		6138	0.07
	Superasteridae	introrse	introrse	1	introrse	0.9888 (0.9701-1.0000)	***		SYMeq*	-346.31	3	698.62	698.65	0	0.38	0.0031	0.0028	0.0031	0.0012	0.0028	0.0012		0 0 Z 0 0 0		6073	0.07
	Asteridae	introrse	introrse	0.9996	introrse	0.9912 (0.9816-1.0000)	***
	Lamiidae	introrse	introrse	0.9998	introrse	0.9953 (0.9898-1.0000)	***																	Npar	Nzero	q01	q02	q10	q12	q20	q21
	Campanulidae	introrse	introrse	1	introrse	0.9983 (0.9958-1.0000)	***																mean	1	1.3	0.0028	0.0028	0.0023	0.0009	0.0026	0.0019
	Superrosidae	introrse	introrse	1	introrse	0.9994 (0.9988-1.0000)	***																95% lb	1	0	0.0022	0.0022	0.0000	0.0000	0.0000	0.0000
	Rosidae	introrse	introrse	1	introrse	0.9958 (0.9905-0.9993)	***																95% ub	1	3	0.0036	0.0036	0.0035	0.0031	0.0035	0.0032
	Malvidae	introrse	introrse	0.9998	introrse	0.9949 (0.9878-1.0000)	***
	Fabidae	introrse	introrse	0.9998	introrse	0.9659 (0.9341-1.0000)	**
312_A. Anther attachment (binary) (D2d)
	Angiospermae	basifixed	basifixed	1	basifixed	0.9901 (0.9491-0.9998)	**		Summary of ML model comparisons										Summary of rjMCMC results
	Mesangiospermae	basifixed	basifixed	0.9986	basifixed	0.9981 (0.9949-1.0000)	***
	Magnoliidae	basifixed	basifixed	0.999	basifixed	0.9771 (0.9535-0.9947)	***		Model	LogL	Npar	AIC	AICc	DeltaAICc	w	q01	q10		Model_str	Model	NrSamples	PostProb
	Monocotyledoneae	basifixed	basifixed	0.9939	basifixed	0.9194 (0.8771-0.9570)	**		ARD	-266.33	2	536.66	536.67	1.31	0.29	0.0043	0.0076		0 0	ER	89825	1
	Eudicotyledoneae	basifixed	basifixed	0.8331	basifixed	0.8034 (0.6025-0.9689)	**		ARDeq**	-265.67	2	535.35	535.36	0	0.55	0.0043	0.0076		0 1	ARD	174	0
	Commelinidae	basifixed	basifixed	0.9764	basifixed	0.9427 (0.9014-0.9770)	**		ER	-267.94	1	537.87	537.88	2.51	0.16	0.0056	0.0056		Z 0	UNI10	1	0
	Pentapetalae	basifixed	dorsifixed	0.8981	dorsifixed	0.5971 (0.3885-0.7642)	*		UNI01	-293.46	1	588.93	588.93	53.57	0	0.0061
	Superasteridae	basifixed	dorsifixed	0.9059	basifixed	0.7265 (0.3436-0.9177)	*		UNI10	-276.74	1	555.49	555.49	20.13	0		0.008			Npar	Nzero	q01	q10
	Asteridae	basifixed	dorsifixed	0.9031	basifixed	0.9339 (0.8760-0.9797)	*												mean	1	0	0.0058	0.0058
	Lamiidae	basifixed	dorsifixed	0.7032	basifixed	0.9363 (0.8972-0.9708)	*												95% lb	1	0	0.0042	0.0042
	Campanulidae	basifixed / dorsifixed	dorsifixed	0.9752	dorsifixed	0.9605 (0.9134-0.9934)	*												95% ub	1	0	0.0076	0.0076
	Superrosidae	basifixed	dorsifixed	0.907	dorsifixed	0.85 (0.7846-0.9033)	*
	Rosidae	dorsifixed	dorsifixed	0.9456	dorsifixed	0.9874 (0.9760-0.9964)	***
	Malvidae	dorsifixed	dorsifixed	0.9776	dorsifixed	0.5463 (0.480-0.613)	*
	Fabidae	dorsifixed	dorsifixed	0.9997	dorsifixed	0.9383 (0.8870-0.9818)	**
313_A. Anther dehiscence (3-state) (D2d)
	Angiospermae	longitudinal slit	longitudinal slit	1	longitudinal slit	0.8108 (0-1)	*		Summary of ML model comparisons														Summary of rjMCMC results
	Mesangiospermae	longitudinal slit	longitudinal slit	1	longitudinal slit	0.8099 (0-1)	*
	Magnoliidae	longitudinal slit	longitudinal slit	0.998	longitudinal slit	0.7801 (0.0000-0.9999)	*		Model	LogL	Npar	AIC	AICc	DeltaAICc	w	q01	q02	q10	q12	q20	q21		Model_str	Model	NrSamples	PostProb
	Monocotyledoneae	longitudinal slit	longitudinal slit	1	longitudinal slit	0.9796 (0.8704-1.0000)	**		ARD	-56.75	6	125.49	125.6	2.2	0.12	0.0002	0.0001	0.0013	0.0004	0.0027	0		0 0 0 Z 0 Z		19648	0.22
	Eudicotyledoneae	longitudinal slit	longitudinal slit	1	longitudinal slit	0.8103 (0-1)	*		ARDeq*	-55.65	6	123.29	123.4	0	0.36	0.0002	0.0001	0.0013	0.0004	0.0027	0		0 0 0 Z 0 0		17828	0.2
	Commelinidae	longitudinal slit	longitudinal slit	1	longitudinal slit	0.9827 (0.8866-1.0000)	**		ER	-61.26	1	124.52	124.52	1.12	0.21	0.0002	0.0002	0.0002	0.0002	0.0002	0.0002		0 0 0 0 0 Z		16088	0.18
	Pentapetalae	longitudinal slit	longitudinal slit	1	longitudinal slit	0.8141 (0-1)	*		SYM	-60.23	3	126.46	126.49	3.09	0.08	0.0002	0.0001	0.0002	0	0.0001	0		0 0 0 0 0 0		11813	0.13
	Superasteridae	longitudinal slit	longitudinal slit	1	longitudinal slit	0.9613 (0.9244-1.0000)	**		SYMeq	-59.13	3	124.26	124.29	0.89	0.23	0.0002	0.0001	0.0002	0	0.0001	0		Z Z Z 0 0 0		7178	0.08
	Asteridae	longitudinal slit	longitudinal slit	1	longitudinal slit	0.9932 (0.9548-1.0000)	***
	Lamiidae	longitudinal slit	longitudinal slit	1	longitudinal slit	0.9882 (0.9222-1.0000)	**																	Npar	Nzero	q01	q02	q10	q12	q20	q21
	Campanulidae	longitudinal slit	longitudinal slit	1	longitudinal slit	0.9894 (0.9293-1.0000)	**																mean	1.1	1.5	0.0002	0.0001	0.0014	0.0027	0.0032	0.003
	Superrosidae	longitudinal slit	longitudinal slit	1	longitudinal slit	0.814 (0-1)	*																95% lb	1	0	0.0000	0.0000	0.0000	0.0000	0.0000	0.0000
	Rosidae	longitudinal slit	longitudinal slit	1	longitudinal slit	0.9907 (0.9409-1.0000)	**																95% ub	2	3	0.0003	0.0003	0.0113	0.0232	0.0225	0.0232
	Malvidae	longitudinal slit	longitudinal slit	1	longitudinal slit	0.987 (0.9138-1.0000)	**
	Fabidae	longitudinal slit	longitudinal slit	1	longitudinal slit	0.9958 (0.9718-1.0000)	***
401_B. Number of structural carpels (5-state) (D2c)
	Angiospermae	more than five (>5)	more than five (>5)	1	more than five (>5)	0.9916 (0.9956-1.0000)	***		Summary of ML model comparisons																												Summary of rjMCMC results
	Mesangiospermae	more than five (>5)	more than five (>5)	1	more than five (>5)	0.9733 (0.8823-1.0000)	**
	Magnoliidae	more than five (>5)	more than five (>5)	1	more than five (>5)	0.9837 (0.9643-0.9998)	***		Model	LogL	Npar	AIC	AICc	DeltaAICc	w	q01	q02	q03	q04	q10	q12	q13	q14	q20	q21	q23	q24	q30	q31	q32	q34	q40	q41	q42	q43		Model_str	Model	NrSamples	PostProb
	Monocotyledoneae	three (3)	more than five (>5)	0.8475	three (3)	0.8295 (0.4871-0.9967)	*		ARD	-663.57	20	1367.15	1368.24	3.22	0.17	0.0017	0	0	0	0.0005	0.0009	0.0025	0	0.0007	0.0012	0.0017	0.0003	0.0007	0.0037	0.0063	0.0012	0.0039	0.0009	0.0025	0.0018		0 Z Z Z Z 0 0 Z Z 0 0 Z 0 0 0 0 0 Z 0 0		5781	0.06
	Eudicotyledoneae	more than five (>5)	more than five (>5)	0.9962	four or five (4-5)	0.594 (0.2317-0.9635)	*		ARDeq**	-661.96	20	1363.93	1365.02	0	0.83	0.0017	0	0	0	0.0005	0.0009	0.0025	0	0.0007	0.0012	0.0017	0.0003	0.0007	0.0037	0.0063	0.0012	0.0039	0.0009	0.0025	0.0018		0 Z Z Z Z 0 0 Z Z 0 0 Z 0 0 0 0 0 0 0 0		1493	0.02
	Commelinidae	three (3)	three (3)	0.9999	three (3)	0.9878 (0.9741-0.9988)	***		ER	-717.57	1	1437.13	1437.14	72.12	0	0.0016	0.0016	0.0016	0.0016	0.0016	0.0016	0.0016	0.0016	0.0016	0.0016	0.0016	0.0016	0.0016	0.0016	0.0016	0.0016	0.0016	0.0016	0.0016	0.0016		Z Z Z Z 0 0 0 Z Z 0 0 Z Z 0 0 0 0 0 0 0		823	0.01
	Pentapetalae	three (3) / four or five (4-5)	four or five (4-5)	0.9998	four or five (4-5)	0.9987 (0.9951-1.0000)	**		SYM	-684.18	10	1388.36	1388.64	23.62	0	0.0009	0.0005	0.001	0.0039	0.0009	0.0014	0.0032	0.0004	0.0005	0.0014	0.0038	0.0008	0.001	0.0032	0.0038	0.0009	0.0039	0.0004	0.0008	0.0009		0 0 0 0 Z 0 0 Z 0 0 0 Z 0 1 1 0 1 0 0 0		644	0.01
	Superasteridae	three (3) / four or five (4-5)	four or five (4-5)	0.9999	four or five (4-5)	0.9446 (0.7479-1.0000)	*		SYMeq	-682.63	10	1385.27	1385.55	20.53	0	0.0009	0.0005	0.001	0.0038	0.0009	0.0014	0.0032	0.0004	0.0005	0.0014	0.0038	0.0008	0.001	0.0032	0.0038	0.0009	0.0038	0.0004	0.0008	0.0009		0 0 Z 0 Z 0 0 Z 0 0 0 Z 0 1 1 0 1 0 0 0		626	0.01
	Asteridae	two (2) / four or five (4-5)	four or five (4-5)	0.9957	four or five (4-5)	0.8276 (0.3255-0.9999)	*		ORD	-754.3	8	1524.61	1524.79	159.77	0	0				0.0042	0.0042				0.0055	0.0076				0.0057	0.0045				0
	Lamiidae	two (2)	two (2)	0.9966	two (2)	0.9928 (0.9813-0.9995)	***		ORDeq	-752.77	8	1521.54	1521.73	156.71	0	0				0.0042	0.0042				0.0054	0.0076				0.0056	0.0045				0			Npar	Nzero	q01	q02	q03	q04	q10	q12	q13	q14	q20	q21
	Campanulidae	two (2)	two (2)	0.9374	two (2)	0.9148 (0.6465-0.9995)	**		ORDSYM	-760.49	4	1528.97	1529.03	164.01	0	0.0042				0.0042	0.0054				0.0054	0.0083				0.0083	0.0046				0.0046		mean	1.9	5	0.0018	0.0009	0.0006	0.0008	0.0008	0.0016	0.0019	0.0001	0.0009	0.0016
	Superrosidae	three (3) / four or five (4-5)	four or five (4-5)	0.9999	four or five (4-5)	0.9814 (0.9377-0.9997)	*		ORDSYMeq	-759.02	4	1526.04	1526.09	161.07	0	0.0042				0.0042	0.0054				0.0054	0.0083				0.0083	0.0046				0.0046		95% lb	1	2	0.0000	0.0000	0.0000	0.0000	0.0000	0.0009	0.0009	0.0000	0.0000	0.0009
	Rosidae	three (3) / four or five (4-5)	four or five (4-5)	0.9998	four or five (4-5)	0.9747 (0.9396-0.9953)	*		ORDER	-765.92	1	1533.83	1533.84	168.82	0	0.0057				0.0057	0.0057				0.0057	0.0057				0.0057	0.0057				0.0057		95% ub	2	8	0.0046	0.0025	0.0018	0.0021	0.0019	0.0031	0.0042	0.0011	0.0018	0.0031
	Malvidae	four or five (4-5)	four or five (4-5)	0.9988	four or five (4-5)	0.8562 (0.5020-0.9987)	**
	Fabidae	four or five (4-5)	four or five (4-5)	1	four or five (4-5)	0.9177 (0.6346-1.0000)	**
400_A. Gynoecium phyllotaxy (D2d)
	Angiospermae	whorled / spiral	spiral	1	spiral	0.9696 (0.9895-1.0000)	**		Summary of ML model comparisons										Summary of rjMCMC results
	Mesangiospermae	whorled	spiral	1	spiral	0.9448 (0.7013-1.0000)	*
	Magnoliidae	whorled	spiral	0.9998	spiral	0.9765 (0.9859-1.0000)	**		Model	LogL	Npar	AIC	AICc	DeltaAICc	w	q01	q10		Model_str	Model	NrSamples	PostProb
	Monocotyledoneae	whorled	whorled	0.5472	whorled	0.9755 (0.9447-1.0000)	**		ARD	-39.69	2	83.37	83.39	1.39	0.31	0.0001	0.0082		0 1	ARD	87336	0.97
	Eudicotyledoneae	whorled	spiral	0.9997	spiral	0.8993 (0.5378-1.0000)	*		ARDeq**	-38.99	2	81.98	82	0	0.63	0.0001	0.0082		0 0	ER	2566	0.03
	Commelinidae	whorled	whorled	0.9997	whorled	0.9629 (0.9057-1.0000)	**		ER	-51.09	1	104.18	104.19	22.19	0	0.0004	0.0004		0 Z	UNI01	98	0
	Pentapetalae	whorled	whorled	0.9777	whorled	0.9971 (0.9905-1.0000)	***		UNI01	-52.93	1	107.85	107.86	25.86	0	0.0004
	Superasteridae	whorled	whorled	0.9928	whorled	0.9923 (0.9793-1.0000)	***		UNI10	-42.4	1	86.8	86.81	4.81	0.06		0.0096			Npar	Nzero	q01	q10
	Asteridae	whorled	whorled	1	whorled	0.996 (0.9889-1.0000)	***												mean	2	0	0.0001	0.0084
	Lamiidae	whorled	whorled	1	whorled	0.9827 (0.9589-1.0000)	***												95% lb	2	0	0.0000	0.0042
	Campanulidae	whorled	whorled	1	whorled	0.9549 (0.904-1.000)	**												95% ub	2	0	0.0003	0.0139
	Superrosidae	whorled	whorled	0.9802	whorled	0.9226 (0.7579-1.0000)	**
	Rosidae	whorled	whorled	0.9804	whorled	0.6223 (0.2614-1.0000)	*
	Malvidae	whorled	whorled	1	whorled	0.9805 (0.9493-1.0000)	**
	Fabidae	whorled	whorled	1	whorled	0.9894 (0.971-1.000)	***
403_A. Fusion of ovaries (binary) (D2c)
	Angiospermae	free (<5%) / fused (>5%)	free (<5%)	1	free (<5%)	0.6037 (0.0671-1.0000)	*		Summary of ML model comparisons										Summary of rjMCMC results
	Mesangiospermae	fused (>5%)	free (<5%)	1	free (<5%)	0.5446 (0-1)	*
	Magnoliidae	fused (>5%)	free (<5%)	0.9999	free (<5%)	0.6366 (0.1289-1.0000)	*		Model	LogL	Npar	AIC	AICc	DeltaAICc	w	q01	q10		Model_str	Model	NrSamples	PostProb
	Monocotyledoneae	fused (>5%)	free (<5%)	0.9297	fused (>5%)	0.8875 (0.6081-1.0000)	*		ARD**	-95.2	2	194.39	194.41	0	0.91	0.0052	0.0005		0 1	ARD	49939	0.55
	Eudicotyledoneae	fused (>5%)	free (<5%)	0.9991	free (<5%)	0.5462 (0.0128-0.9944)	*		ARDeq	-102.35	2	208.71	208.72	14.31	0	0.0007	0.0008		0 0	ER	39922	0.44
	Commelinidae	fused (>5%)	fused (>5%)	0.9999	fused (>5%)	0.9951 (0.9826-1.0000)	***		ER	-102.85	1	207.7	207.7	13.3	0	0.0008	0.0008		Z 0	UNI10	139	0
	Pentapetalae	fused (>5%)	fused (>5%)	0.9976	fused (>5%)	0.9865 (0.9579-1.0000)	***		UNI01	-98.54	1	199.08	199.08	4.67	0.09	0.0111
	Superasteridae	fused (>5%)	fused (>5%)	0.9979	fused (>5%)	0.9645 (0.8672-1.0000)	**		UNI10	-107.17	1	216.35	216.35	21.94	0		0.0009			Npar	Nzero	q01	q10
	Asteridae	fused (>5%)	fused (>5%)	1	fused (>5%)	0.999 (0.9961-1.0000)	***												mean	1.6	0	0.0034	0.0007
	Lamiidae	fused (>5%)	fused (>5%)	1	fused (>5%)	0.9961 (0.9867-1.0000)	***												95% lb	1	0	0.0004	0.0003
	Campanulidae	fused (>5%)	fused (>5%)	1	fused (>5%)	0.9975 (0.9904-1.0000)	***												95% ub	2	0	0.0076	0.0011
	Superrosidae	fused (>5%)	fused (>5%)	0.9997	fused (>5%)	0.9881 (0.9918-1.0000)	***
	Rosidae	fused (>5%)	fused (>5%)	0.9999	fused (>5%)	0.9866 (0.9849-1.0000)	***
	Malvidae	fused (>5%)	fused (>5%)	1	fused (>5%)	0.9972 (0.9896-1.0000)	***
	Fabidae	fused (>5%)	fused (>5%)	0.9998	fused (>5%)	0.8315 (0.1539-1.0000)	*
411_A. Number of ovules per functional carpel (3-state) (D2c)
	Angiospermae	one (1)	three or more (>2)	1	three or more (>2)	0.9869 (0.9476-1.0000)	*		Summary of ML model comparisons														Summary of rjMCMC results
	Mesangiospermae	one (1)	three or more (>2)	1	three or more (>2)	0.9919 (0.9977-1.0000)	**
	Magnoliidae	one (1)	three or more (>2)	0.9998	three or more (>2)	0.9315 (0.7469-1.0000)	*		Model	LogL	Npar	AIC	AICc	DeltaAICc	w	q01	q02	q10	q12	q20	q21		Model_str	Model	NrSamples	PostProb
	Monocotyledoneae	one (1) / three or more (>2)	three or more (>2)	1	three or more (>2)	0.9916 (0.9784-1.0000)	**		ARD	-386.85	6	785.7	785.8	2.19	0.25	0.0013	0.0007	0.0039	0.0006	0.004	0.004		Z Z 0 Z 0 0		60924	0.68
	Eudicotyledoneae	three or more (>2)	three or more (>2)	1	three or more (>2)	0.959 (0.8639-1.0000)	**		ARDeq**	-385.75	6	783.51	783.61	0	0.75	0.0013	0.0007	0.0039	0.0006	0.004	0.004		0 Z 0 0 0 0		24050	0.27
	Commelinidae	one (1)	three or more (>2)	0.9041	three or more (>2)	0.76 (0.1558-1.0000)	*		ER	-402.49	1	806.98	806.99	23.37	0	0.0028	0.0028	0.0028	0.0028	0.0028	0.0028		Z Z 0 0 0 0		2732	0.03
	Pentapetalae	three or more (>2)	three or more (>2)	1	three or more (>2)	0.992 (0.9944-1.0000)	***		SYM	-401.96	3	809.92	809.95	26.34	0	0.0025	0.0028	0.0025	0.0034	0.0028	0.0034		Z Z 0 0 Z 0		648	0.01
	Superasteridae	three or more (>2)	three or more (>2)	0.9998	three or more (>2)	0.9859 (0.9708-1.0000)	***		SYMeq	-400.99	3	807.98	808.02	24.4	0	0.0025	0.0027	0.0025	0.0034	0.0027	0.0034		0 0 1 0 1 1		537	0.01
	Asteridae	one (1)	three or more (>2)	0.9972	three or more (>2)	0.9884 (0.9792-1.0000)	**		ORD	-398.93	4	805.86	805.91	22.3	0	0.0005		0.0075	0.0069		0.0049
	Lamiidae	one (1) / two (2) / three or more (>2)	three or more (>2)	1	three or more (>2)	0.9673 (0.8691-1.0000)	*		ORDeq	-397.84	4	803.67	803.72	20.11	0	0.0005		0.0075	0.0069		0.0049			Npar	Nzero	q01	q02	q10	q12	q20	q21
	Campanulidae	one (1)	three or more (>2)	0.9986	three or more (>2)	0.9411 (0.7585-1.0000)	*		ORDSYM	-412.5	2	828.99	829.01	45.39	0	0.0054		0.0054	0.0074		0.0074		mean	1	2.4	0.001	0	0.0044	0.0012	0.0043	0.0044
	Superrosidae	two (2) / three or more (>2)	three or more (>2)	1	three or more (>2)	0.9658 (0.8087-1.0000)	*		ORDSYMeq	-411.57	2	827.14	827.15	43.54	0	0.0054		0.0054	0.0074		0.0074		95% lb	1	1	0.0000	0	0.0032	0.0000	0.0032	0.0032
	Rosidae	two (2)	three or more (>2)	1	three or more (>2)	0.8902 (0.3593-1.0000)	*		ORDER	-413.51	1	829.02	829.03	45.41	0	0.0062		0.0062	0.0062		0.0062		95% ub	1	3	0.0041	0	0.0053	0.0043	0.0053	0.0053
	Malvidae	two (2)	three or more (>2)	0.9996	three or more (>2)	0.9483 (0.8006-1.0000)	*
	Fabidae	two (2)	three or more (>2)	1	three or more (>2)	0.8437 (0.2072-1.0000)	*
[truncated: 10 more columns]

## Sheet: C
Character	Node	MP state(s)	ML state	Prob	rjMCMC state	Prob (mean and 95% HPD)	Confidence
100_A. Functional sex of flowers (D2d)
	Angiospermae	bisexual / unisexual	bisexual	1	bisexual	0.9967 (0.9901-1.0000)	**		Summary of ML model comparisons										Summary of rjMCMC results
	Mesangiospermae	bisexual	bisexual	1	bisexual	1 (1-1)	***
	Magnoliidae	bisexual	bisexual	1	bisexual	0.9995 (0.9984-1.0000)	***		Model	LogL	Npar	AIC	AICc	DeltaAICc	w	q01	q10		Model_str	Model	NrSamples	PostProb
	Monocotyledoneae	bisexual	bisexual	1	bisexual	0.9983 (0.995-1.000)	***		ARD	-312.55	2	629.11	629.12	1.38	0.24	0.003	0.0008		0 0	ER	45223	0.5
	Eudicotyledoneae	bisexual	bisexual	1	bisexual	0.9996 (0.9987-1.0000)	***		ARDeq*	-311.86	2	627.73	627.74	0	0.47	0.003	0.0008		0 Z	UNI01	44668	0.5
	Commelinidae	bisexual	bisexual	1	bisexual	0.9807 (0.9332-1.0000)	**		ER	-315.27	1	632.54	632.54	4.8	0.04	0.0029	0.0029		0 1	ARD	109	0
	Pentapetalae	bisexual	bisexual	1	bisexual	1 (0.9997-1.0000)	***		UNI01	-313.49	1	628.98	628.98	1.24	0.25	0.003
	Superasteridae	bisexual	bisexual	1	bisexual	0.9996 (0.9983-1.0000)	***		UNI10	-354.49	1	710.98	710.99	83.24	0		0.0119			Npar	Nzero	q01	q10
	Asteridae	bisexual	bisexual	1	bisexual	0.9998 (0.9992-1.0000)	***												mean	1	0.5	0.003	0.0015
	Lamiidae	bisexual	bisexual	1	bisexual	0.9987 (0.9954-1.0000)	***												95% lb	1	0	0.0024	0.0000
	Campanulidae	bisexual	bisexual	0.9993	bisexual	0.8574 (0.5815-1.0000)	**												95% ub	1	1	0.0037	0.0035
	Superrosidae	bisexual	bisexual	1	bisexual	0.9998 (0.9995-1.0000)	***
	Rosidae	bisexual	bisexual	1	bisexual	0.9964 (0.9896-1.0000)	***
	Malvidae	bisexual	bisexual	0.9997	bisexual	0.9424 (0.8396-1.0000)	**
	Fabidae	bisexual	bisexual	1	bisexual	0.9693 (0.887-1.000)	**
100_B. Structural sex of flowers (D2d)
	Angiospermae	bisexual	bisexual	1	bisexual	0.9988 (0.9978-0.9997)	***		Summary of ML model comparisons										Summary of rjMCMC results
	Mesangiospermae	bisexual	bisexual	1	bisexual	1 (1-1)	***
	Magnoliidae	bisexual	bisexual	1	bisexual	0.9999 (0.9999-1.0000)	***		Model	LogL	Npar	AIC	AICc	DeltaAICc	w	q01	q10		Model_str	Model	NrSamples	PostProb
	Monocotyledoneae	bisexual	bisexual	1	bisexual	0.9991 (0.9983-0.9997)	***		ARD	-208.28	2	420.56	420.58	1.36	0.28	0.0015	0.0039		0 0	ER	89833	1
	Eudicotyledoneae	bisexual	bisexual	1	bisexual	0.9999 (0.9999-1.0000)	***		ARDeq**	-207.6	2	419.2	419.22	0	0.55	0.0015	0.0039		0 1	ARD	167	0
	Commelinidae	bisexual	bisexual	0.9999	bisexual	0.9996 (0.9991-1.0000)	***		ER	-209.74	1	421.47	421.48	2.26	0.18	0.0016	0.0016
	Pentapetalae	bisexual	bisexual	1	bisexual	1 (0.9999-1.0000)	***		UNI01	-226.92	1	455.84	455.85	36.63	0	0.0017				Npar	Nzero	q01	q10
	Superasteridae	bisexual	bisexual	1	bisexual	0.9998 (0.9994-1.0000)	***		UNI10	-231.58	1	465.15	465.16	45.94	0		0.0167		mean	1	0	0.0016	0.0016
	Asteridae	bisexual	bisexual	1	bisexual	0.9999 (0.9998-1.0000)	***												95% lb	1	0	0.0012	0.0012
	Lamiidae	bisexual	bisexual	0.9999	bisexual	0.9992 (0.9981-1.0000)	***												95% ub	1	0	0.0021	0.0021
	Campanulidae	bisexual	bisexual	1	bisexual	0.9995 (0.999-1.000)	***
	Superrosidae	bisexual	bisexual	1	bisexual	1 (0.9999-1.0000)	***
	Rosidae	bisexual	bisexual	1	bisexual	0.9993 (0.9987-0.9997)	***
	Malvidae	bisexual	bisexual	1	bisexual	0.9997 (0.9993-1.0000)	***
	Fabidae	bisexual	bisexual	0.9977	bisexual	0.9889 (0.9671-0.9998)	***
102_B. Ovary position (binary) (D2d)
	Angiospermae	superior	superior	1	superior	0.9996 (0.9991-1.0000)	***		Summary of ML model comparisons										Summary of rjMCMC results
	Mesangiospermae	superior	superior	1	superior	1 (1-1)	***
	Magnoliidae	superior	superior	0.9997	superior	0.9961 (0.9921-0.9995)	***		Model	LogL	Npar	AIC	AICc	DeltaAICc	w	q01	q10		Model_str	Model	NrSamples	PostProb
	Monocotyledoneae	superior	superior	0.9983	superior	0.9901 (0.9791-0.9972)	***		ARD	-272.01	2	548.03	548.04	1.38	0.25	0.0021	0.0036		0 0	ER	89938	1
	Eudicotyledoneae	superior	superior	1	superior	0.9998 (0.9997-1.0000)	***		ARDeq*	-271.32	2	546.65	546.66	0	0.49	0.0021	0.0036		0 1	ARD	42	0
	Commelinidae	superior	superior	0.766	superior	0.9968 (0.9942-0.9990)	***		ER	-272.95	1	547.89	547.9	1.24	0.26	0.0024	0.0024		0 Z	UNI01	20	0
	Pentapetalae	superior	superior	0.9995	superior	0.9995 (0.9985-1.0000)	***		UNI01	-281.44	1	564.88	564.89	18.23	0	0.0027
	Superasteridae	superior	superior	0.9998	superior	0.9994 (0.9986-1.0000)	***		UNI10	-294.63	1	591.27	591.27	44.61	0		0.0099			Npar	Nzero	q01	q10
	Asteridae	superior	superior	0.9785	superior	0.7823 (0.5938-0.9036)	**												mean	1	0	0.0024	0.0024
	Lamiidae	superior	superior	0.9791	superior	0.9685 (0.9464-0.9872)	**												95% lb	1	0	0.0018	0.0018
	Campanulidae	superior	superior	0.8204	inferior	0.8705 (0.8003-0.9420)	*												95% ub	1	0	0.0030	0.0030
	Superrosidae	superior	superior	0.9776	superior	0.8694 (0.6374-0.9653)	**
	Rosidae	superior / inferior	superior	0.9773	superior	0.9541 (0.8692-0.9883)	*
	Malvidae	superior	superior	1	superior	0.9992 (0.9984-0.9998)	***
	Fabidae	superior	superior	0.9997	superior	0.9967 (0.9924-0.9998)	***
201_A. Perianth presence (D2c)
	Angiospermae	present	present	1	present	1 (0.9999-1.0000)	***		Summary of ML model comparisons										Summary of rjMCMC results
	Mesangiospermae	present	present	1	present	1 (1-1)	***
	Magnoliidae	present	present	1	present	1 (1-1)	***		Model	LogL	Npar	AIC	AICc	DeltaAICc	w	q01	q10		Model_str	Model	NrSamples	PostProb
	Monocotyledoneae	present	present	1	present	0.9999 (0.9998-1.0000)	***		ARD	-96.83	2	197.67	197.69	2.01	0.13	0	0.0005		0 0	ER	66858	0.74
	Eudicotyledoneae	present	present	1	present	1 (1-1)	***		ARDeq	-96.14	2	196.28	196.3	0.62	0.26	0	0.0005		Z 0	UNI10	23116	0.26
	Commelinidae	present	present	1	present	1 (0.9999-1.0000)	***		ER	-97.11	1	196.21	196.22	0.54	0.27	0.0005	0.0005		0 1	ARD	26	0
	Pentapetalae	present	present	1	present	1 (1-1)	***		UNI01	-109.88	1	221.76	221.76	26.09	0	0.0224
	Superasteridae	present	present	1	present	1 (1-1)	***		UNI10*	-96.83	1	195.67	195.67	0	0.35		0.0005			Npar	Nzero	q01	q10
	Asteridae	present	present	1	present	1 (1-1)	***												mean	1	0.3	0.0004	0.0005
	Lamiidae	present	present	1	present	0.9999 (0.9998-1.0000)	***												95% lb	1	0	0.0000	0.0003
	Campanulidae	present	present	1	present	1 (0.9999-1.0000)	***												95% ub	1	1	0.0007	0.0007
	Superrosidae	present	present	1	present	1 (1-1)	***
	Rosidae	present	present	1	present	1 (0.9999-1.0000)	***
	Malvidae	present	present	1	present	1 (0.9999-1.0000)	***
	Fabidae	present	present	1	present	1 (1-1)	***
201_B. Number of perianth parts (3-state) (D2c)
	Angiospermae	six to ten (6-10) / more than ten (>10)	more than ten (>10)	1	more than ten (>10)	0.94 (0.751-1.000)	*		Summary of ML model comparisons														Summary of rjMCMC results
	Mesangiospermae	six to ten (6-10)	more than ten (>10)	0.9999	more than ten (>10)	0.5619 (0.0209-1.0000)	*
	Magnoliidae	six to ten (6-10)	more than ten (>10)	0.9999	more than ten (>10)	0.9012 (0.7668-1.0000)	*		Model	LogL	Npar	AIC	AICc	DeltaAICc	w	q01	q02	q10	q12	q20	q21		Model_str	Model	NrSamples	PostProb
	Monocotyledoneae	six to ten (6-10)	six to ten (6-10)	0.5684	six to ten (6-10)	0.861 (0.4936-0.9981)	*		ARD	-325.17	6	662.34	662.45	2.2	0.25	0.0038	0.0003	0.0018	0.0004	0.0034	0.0082		0 1 1 Z 0 0		32315	0.36
	Eudicotyledoneae	six to ten (6-10)	more than ten (>10)	0.9952	more than ten (>10)	0.4873 (0.0701-0.9545)	*		ARDeq**	-324.07	6	660.15	660.25	0	0.74	0.0038	0.0003	0.0018	0.0004	0.0034	0.0082		0 1 2 Z 1 1		21097	0.23
	Commelinidae	six to ten (6-10)	six to ten (6-10)	0.9999	six to ten (6-10)	0.8614 (0.4962-0.9997)	*		ER	-350.39	1	702.78	702.79	42.53	0	0.0013	0.0013	0.0013	0.0013	0.0013	0.0013		0 0 0 Z 0 0		19379	0.22
	Pentapetalae	six to ten (6-10)	six to ten (6-10)	0.9952	six to ten (6-10)	0.8628 (0.5002-1.0000)	**		SYM	-339.53	3	685.06	685.09	24.83	0	0.002	0.0011	0.002	0.0006	0.0011	0.0006		0 0 0 Z 0 1		4440	0.05
	Superasteridae	six to ten (6-10)	six to ten (6-10)	0.9974	six to ten (6-10)	0.8521 (0.4978-1.0000)	*		SYMeq	-338.46	3	682.91	682.94	22.69	0	0.002	0.0011	0.002	0.0006	0.0011	0.0006		0 Z 1 1 0 0		2508	0.03
	Asteridae	six to ten (6-10)	six to ten (6-10)	1	six to ten (6-10)	0.8649 (0.4991-0.9999)	*		ORD	-331.17	4	670.34	670.39	10.13	0	0.004		0.0021	0.0005		0.0119
	Lamiidae	six to ten (6-10)	six to ten (6-10)	0.9999	six to ten (6-10)	0.8624 (0.4941-0.9993)	*		ORDeq	-330.07	4	668.14	668.19	7.94	0.01	0.004		0.0021	0.0005		0.0119			Npar	Nzero	q01	q02	q10	q12	q20	q21
	Campanulidae	six to ten (6-10)	six to ten (6-10)	0.9999	six to ten (6-10)	0.8635 (0.4957-0.9997)	*		ORDSYM	-341.97	2	687.94	687.95	27.7	0	0.0021		0.0021	0.0008		0.0008		mean	2	1	1.0203	0.0027	0.2399	0	0.0042	0.0046
	Superrosidae	six to ten (6-10)	six to ten (6-10)	0.9991	six to ten (6-10)	0.8592 (0.4997-0.9999)	*		ORDSYMeq	-340.91	2	685.81	685.83	25.57	0	0.0021		0.0021	0.0008		0.0008		95% lb	1	0	0.0000	0.0000	0.0005	0.0000	0.0017	0.0019
	Rosidae	six to ten (6-10)	six to ten (6-10)	0.9994	six to ten (6-10)	0.8329 (0.4956-0.9954)	*		ORDER	-351.35	1	704.71	704.71	44.46	0	0.0014		0.0014	0.0014		0.0014		95% ub	3	1	5.6237	0.0048	1.3195	0.0003	0.0078	0.0092
	Malvidae	six to ten (6-10)	six to ten (6-10)	0.9999	six to ten (6-10)	0.8659 (0.4957-0.9997)	*
	Fabidae	six to ten (6-10)	six to ten (6-10)	0.9993	six to ten (6-10)	0.7541 (0.4891-0.9992)	*
201_C. Number of perianth parts (binary) (D2c)
	Angiospermae	more than six (>6)	more than six (>6)	1	more than six (>6)	0.9897 (0.9345-1.0000)	**		Summary of ML model comparisons										Summary of rjMCMC results
	Mesangiospermae	one to six (1-6) / more than six (>6)	more than six (>6)	1	more than six (>6)	0.8405 (0.153-1.000)	*
	Magnoliidae	one to six (1-6) / more than six (>6)	more than six (>6)	1	more than six (>6)	0.9938 (0.9624-1.0000)	**		Model	LogL	Npar	AIC	AICc	DeltaAICc	w	q01	q10		Model_str	Model	NrSamples	PostProb
	Monocotyledoneae	one to six (1-6)	one to six (1-6)	0.7998	one to six (1-6)	0.9979 (0.9964-0.9992)	***		ARD	-247.75	2	499.51	499.52	1.39	0.33	0.0006	0.0026		Z 0	UNI10	69280	0.77
	Eudicotyledoneae	one to six (1-6)	more than six (>6)	1	more than six (>6)	0.9545 (0.7092-1.0000)	*		ARDeq**	-247.06	2	498.12	498.14	0	0.66	0.0006	0.0026		0 0	ER	19072	0.21
	Commelinidae	one to six (1-6)	one to six (1-6)	1	one to six (1-6)	0.9991 (0.9979-0.9999)	***		ER	-254.33	1	510.67	510.67	12.54	0	0.0022	0.0022		0 1	ARD	1648	0.02
	Pentapetalae	more than six (>6)	more than six (>6)	1	more than six (>6)	1 (1-1)	***		UNI01	-323.73	1	649.45	649.46	151.32	0	0.0083
	Superasteridae	more than six (>6)	more than six (>6)	1	more than six (>6)	0.9999 (0.9995-1.0000)	***		UNI10	-252.79	1	507.58	507.59	9.45	0.01		0.0029			Npar	Nzero	q01	q10
	Asteridae	more than six (>6)	more than six (>6)	1	more than six (>6)	1 (0.9998-1.0000)	***												mean	1	0.8	0.0005	0.0027
	Lamiidae	more than six (>6)	more than six (>6)	1	more than six (>6)	0.9997 (0.9983-1.0000)	***												95% lb	1	0	0.0000	0.0019
	Campanulidae	more than six (>6)	more than six (>6)	1	more than six (>6)	0.9998 (0.999-1.000)	***												95% ub	1	1	0.0024	0.0035
	Superrosidae	more than six (>6)	more than six (>6)	1	more than six (>6)	0.9999 (0.9997-1.0000)	***
	Rosidae	more than six (>6)	more than six (>6)	1	more than six (>6)	0.9988 (0.9931-1.0000)	***
	Malvidae	more than six (>6)	more than six (>6)	1	more than six (>6)	0.9999 (0.9993-1.0000)	***
	Fabidae	more than six (>6)	more than six (>6)	1	more than six (>6)	0.9986 (0.9915-1.0000)	***
230_A. Perianth phyllotaxy (binary) (D2d)
	Angiospermae	whorled / spiral	spiral	1	whorled	0.8107 (0-1)	*		Summary of ML model comparisons										Summary of rjMCMC results
	Mesangiospermae	whorled	spiral	1	whorled	0.8331 (0.0005-1.0000)	*
	Magnoliidae	whorled	spiral	0.9997	whorled	0.831 (0.0053-1.0000)	*		Model	LogL	Npar	AIC	AICc	DeltaAICc	w	q01	q10		Model_str	Model	NrSamples	PostProb
	Monocotyledoneae	whorled	spiral	0.5143	whorled	0.993 (0.9522-1.0000)	*		ARD***	-70.06	2	144.12	144.13	0	0.99	0.0002	0.011		0 0	ER	61266	0.68
	Eudicotyledoneae	whorled	spiral	0.9996	whorled	0.8341 (0.004-1.000)	*		ARDeq	-77.1	2	158.19	158.21	14.07	0	0.0004	0.0005		0 1	ARD	15424	0.17
	Commelinidae	whorled	whorled	0.9998	whorled	0.9953 (0.9677-1.0000)	***		ER	-77.75	1	157.5	157.5	13.37	0	0.0004	0.0004		0 Z	UNI01	13310	0.15
	Pentapetalae	whorled	whorled	0.9804	whorled	0.9989 (0.9946-1.0000)	***		UNI01	-78	1	158	158.01	13.87	0	0.0004
	Superasteridae	whorled	whorled	0.9835	whorled	0.9898 (0.9267-1.0000)	**		UNI10	-76.04	1	154.08	154.08	9.95	0.01		0.0178			Npar	Nzero	q01	q10
	Asteridae	whorled	whorled	0.9997	whorled	0.9987 (0.9916-1.0000)	***												mean	1.2	0.1	0.0004	0.0022
	Lamiidae	whorled	whorled	1	whorled	0.9951 (0.9662-1.0000)	***												95% lb	1	0	0.0001	0.0000
	Campanulidae	whorled	whorled	1	whorled	0.9952 (0.9662-1.0000)	***												95% ub	2	1	0.0006	0.0126
	Superrosidae	whorled	whorled	0.9919	whorled	0.9968 (0.9796-1.0000)	***
	Rosidae	whorled	whorled	0.9951	whorled	0.9965 (0.9769-1.0000)	***
	Malvidae	whorled	whorled	1	whorled	0.9951 (0.9657-1.0000)	***
	Fabidae	whorled	whorled	1	whorled	0.9994 (0.9959-1.0000)	***
231_A. Number of perianth whorls (D2c)
	Angiospermae	two (2) / more than two (>2)	more than two (>2)	1	more than two (>2)	0.9989 (0.9973-0.9998)	**		Summary of ML model comparisons														Summary of rjMCMC results
	Mesangiospermae	two (2) / more than two (>2)	more than two (>2)	1	more than two (>2)	0.9961 (0.9876-0.9999)	**
	Magnoliidae	one (1) / two (2) / more than two (>2)	more than two (>2)	1	more than two (>2)	0.9936 (0.9855-0.9997)	**		Model	LogL	Npar	AIC	AICc	DeltaAICc	w	q01	q02	q10	q12	q20	q21		Model_str	Model	NrSamples	PostProb
	Monocotyledoneae	two (2)	two (2)	0.7194	two (2)	0.9953 (0.9875-0.9993)	***		ARD	-269.95	6	551.91	552.02	2.2	0.25	0.0046	0.0002	0.0015	0.0001	0.0025	0.004		0 0 0 Z 0 0		48491	0.54
	Eudicotyledoneae	two (2) / more than two (>2)	more than two (>2)	0.992	more than two (>2)	0.8954 (0.7526-0.9857)	*		ARDeq**	-268.86	6	549.71	549.82	0	0.75	0.0046	0.0002	0.0015	0.0001	0.0025	0.004		0 1 1 Z 0 0		37693	0.42
	Commelinidae	two (2)	two (2)	1	two (2)	0.9977 (0.9927-0.9999)	***		ER	-311.23	1	624.46	624.46	74.64	0	0.001	0.001	0.001	0.001	0.001	0.001		0 1 1 Z 1 0		3135	0.03
	Pentapetalae	two (2)	two (2)	0.9998	two (2)	0.9997 (0.9988-1.0000)	***		SYM	-292.92	3	591.85	591.88	42.06	0	0.0019	0.0007	0.0019	0.0003	0.0007	0.0003		0 1 1 Z 0 1		373	0
	Superasteridae	two (2)	two (2)	0.9998	two (2)	0.9877 (0.9381-1.0000)	**		SYMeq	-291.92	3	589.84	589.87	40.05	0	0.0019	0.0007	0.0019	0.0003	0.0007	0.0003		0 0 0 Z 1 1		62	0
	Asteridae	two (2)	two (2)	0.9998	two (2)	0.9993 (0.9975-1.0000)	***		ORD	-277.05	4	562.1	562.15	12.33	0	0.0045		0.0017	0.0001		0.0065
	Lamiidae	two (2)	two (2)	0.9999	two (2)	0.9944 (0.9833-1.0000)	***		ORDeq	-275.95	4	559.9	559.95	10.13	0	0.0045		0.0017	0.0001		0.0065			Npar	Nzero	q01	q02	q10	q12	q20	q21
	Campanulidae	two (2)	two (2)	1	two (2)	0.9966 (0.9884-0.9999)	***		ORDSYM	-298.13	2	600.27	600.28	50.46	0	0.0019		0.0019	0.0004		0.0004		mean	1.5	1	0.0028	0.0016	0.0016	0	0.0027	0.0028
	Superrosidae	two (2)	two (2)	1	two (2)	0.9993 (0.9979-1.0000)	***		ORDSYMeq	-297.05	2	598.1	598.12	48.3	0	0.0019		0.0019	0.0004		0.0004		95% lb	1	1	0.0013	0.0010	0.0010	0	0.0013	0.0013
	Rosidae	two (2)	two (2)	1	two (2)	0.9939 (0.9834-0.9993)	***		ORDER	-313.56	1	629.13	629.13	79.32	0	0.0012		0.0012	0.0012		0.0012		95% ub	2	1	0.0050	0.0022	0.0022	0	0.0049	0.0050
	Malvidae	two (2)	two (2)	0.9999	two (2)	0.9974 (0.9916-0.9999)	***
	Fabidae	two (2)	two (2)	0.9977	two (2)	0.8924 (0.4910-0.9999)	*
232_A. Perianth merism (4-state) (D2c)
	Angiospermae	trimerous	trimerous	1	trimerous	0.9792 (0.9701-0.9917)	***		Summary of ML model comparisons																				Summary of rjMCMC results
	Mesangiospermae	trimerous	trimerous	1	trimerous	0.997 (0.9947-1.0000)	***
	Magnoliidae	trimerous	trimerous	1	trimerous	0.9589 (0.9121-0.9892)	**		Model	LogL	Npar	AIC	AICc	DeltaAICc	w	q01	q02	q03	q10	q12	q13	q20	q21	q23	q30	q31	q32		Model_str	Model	NrSamples	PostProb
	Monocotyledoneae	trimerous	trimerous	1	trimerous	0.9973 (0.9944-0.9994)	***		ARD	-323.65	12	671.31	671.71	10.48	0	0	0.001	0	0.0014	0.0005	0.0003	0.0005	0.0024	0.0042	0.0001	0	0.0027		0 0 0 0 Z Z 0 0 0 Z Z 0		45580	0.51
	Eudicotyledoneae	dimerous / trimerous	trimerous	0.9676	dimerous	0.6949 (0.1910-0.9939)	*		ARDeq	-322.29	12	668.57	668.98	7.75	0.02	0	0.001	0	0.0014	0.0005	0.0003	0.0005	0.0024	0.0042	0.0001	0	0.0027		Z 0 0 0 Z Z 0 0 0 Z Z 0		31747	0.35
	Commelinidae	trimerous	trimerous	1	trimerous	0.9986 (0.9964-0.9999)	***		ER	-360.68	1	723.35	723.36	62.13	0	0.0008	0.0008	0.0008	0.0008	0.0008	0.0008	0.0008	0.0008	0.0008	0.0008	0.0008	0.0008		0 0 0 0 Z Z 0 0 Z Z Z 0		8867	0.1
	Pentapetalae	pentamerous	pentamerous	0.9997	pentamerous	0.9999 (0.9997-1.0000)	***		SYM	-325.94	6	663.88	663.99	2.76	0.2	0.0013	0.0004	0.0002	0.0013	0.0008	0.0002	0.0004	0.0008	0.0025	0.0002	0.0002	0.0025		Z 0 0 0 Z Z 0 0 Z Z Z 0		2792	0.03
	Superasteridae	pentamerous	pentamerous	1	pentamerous	0.9987 (0.9971-1.0000)	***		SYMeq**	-324.56	6	661.12	661.22	0	0.78	0.0013	0.0004	0.0002	0.0013	0.0008	0.0002	0.0004	0.0008	0.0025	0.0002	0.0002	0.0025		0 0 Z 0 Z Z 0 0 0 Z Z 0		320	0
	Asteridae	pentamerous	pentamerous	1	pentamerous	0.9982 (0.9961-0.9999)	***		ORD	-336.72	6	685.43	685.54	24.32	0	0			0.002	0.0008			0.004	0.0057			0.0029
	Lamiidae	pentamerous	pentamerous	1	pentamerous	0.9964 (0.9919-0.9999)	***		ORDeq	-335.4	6	682.81	682.92	21.69	0	0			0.002	0.0009			0.0039	0.0058			0.0029			Npar	Nzero	q01	q02	q03	q10	q12	q13	q20	q21	q23	q30	q31	q32
	Campanulidae	pentamerous	pentamerous	1	pentamerous	0.998 (0.9953-0.9999)	***		ORDSYM	-344.43	3	694.87	694.9	33.68	0	0.002			0.002	0.002			0.002	0.0029			0.0029		mean	1	4.5	0.0016	0.0026	0.0026	0.0026	0	0	0.0026	0.0026	0.0022	0	0	0.0026
	Superrosidae	pentamerous	pentamerous	1	pentamerous	0.9999 (0.9997-1.0000)	***		ORDSYMeq	-343.06	3	692.12	692.15	30.93	0	0.002			0.002	0.0019			0.0019	0.0029			0.0029		95% lb	1	4	0.000	0.0020	0.0020	0.0020	0	0	0.0020	0.0020	0.000	0	0	0.0020
	Rosidae	pentamerous	pentamerous	1	pentamerous	0.9983 (0.9971-0.9995)	***		ORDER	-345.97	1	693.93	693.94	32.71	0	0.0025			0.0025	0.0025			0.0025	0.0025			0.0025		95% ub	1	5	0.003	0.0032	0.0032	0.0032	0	0	0.0032	0.0031	0.003	0	0	0.0032
	Malvidae	pentamerous	pentamerous	1	pentamerous	0.9976 (0.9949-0.9999)	***
	Fabidae	pentamerous	pentamerous	1	pentamerous	0.9979 (0.9941-1.0000)	***
232_B. Perianth merism (3-state) (D2c)
	Angiospermae	trimerous	trimerous	1	trimerous	0.992 (0.9917-0.9970)	***		Summary of ML model comparisons														Summary of rjMCMC results
	Mesangiospermae	trimerous	trimerous	1	trimerous	0.9967 (0.9979-0.9998)	***
	Magnoliidae	trimerous	trimerous	1	trimerous	0.9868 (0.9857-0.9961)	***		Model	LogL	Npar	AIC	AICc	DeltaAICc	w	q01	q02	q10	q12	q20	q21		Model_str	Model	NrSamples	PostProb
	Monocotyledoneae	trimerous	trimerous	1	trimerous	0.9962 (0.9972-0.9994)	***		ARD	-256.15	6	524.3	524.41	6.05	0.02	0.0008	0.0002	0.0024	0.0037	0	0.0027		0 Z 0 0 Z 0		88275	0.98
	Eudicotyledoneae	trimerous	trimerous	0.9795	pentamerous	0.5801 (0.4381-0.7220)	*		ARDeq	-255.07	6	522.14	522.25	3.89	0.06	0.0008	0.0002	0.0024	0.0037	0	0.0027		0 0 1 0 Z 1		345	0
	Commelinidae	trimerous	trimerous	1	trimerous	0.9992 (0.9981-1.0000)	***		ER	-281.41	1	564.83	564.83	46.47	0	0.0011	0.0011	0.0011	0.0011	0.0011	0.0011		Z 0 0 0 Z 0		292	0
	Pentapetalae	pentamerous	pentamerous	0.9998	pentamerous	1 (0.9998-1.0000)	***		SYM	-257.26	3	520.52	520.55	2.19	0.14	0.001	0.0002	0.001	0.0025	0.0002	0.0025		0 Z 1 1 Z 1		217	0
	Superasteridae	pentamerous	pentamerous	1	pentamerous	0.9988 (0.997-1.000)	***		SYMeq*	-256.17	3	518.33	518.36	0	0.42	0.001	0.0002	0.001	0.0025	0.0002	0.0025		Z Z 0 0 Z 0		185	0
	Asteridae	pentamerous	pentamerous	0.9999	pentamerous	0.9972 (0.9943-0.9995)	***		ORD	-256.99	4	521.98	522.03	3.67	0.07	0.001		0.0025	0.0048		0.0028
	Lamiidae	pentamerous	pentamerous	1	pentamerous	0.9981 (0.9959-0.9999)	***		ORDeq	-255.92	4	519.84	519.89	1.52	0.19	0.001		0.0025	0.0049		0.0028			Npar	Nzero	q01	q02	q10	q12	q20	q21
	Campanulidae	pentamerous	pentamerous	1	pentamerous	0.9984 (0.9967-0.9998)	***		ORDSYM	-259.98	2	523.96	523.98	5.62	0.03	0.0015		0.0015	0.0028		0.0028		mean	1	2	0.0024	0	0.0025	0.0024	0	0.0025
	Superrosidae	pentamerous	pentamerous	1	pentamerous	0.9999 (0.9998-1.0000)	***		ORDSYMeq	-258.89	2	521.78	521.79	3.43	0.07	0.0015		0.0015	0.0028		0.0028		95% lb	1	2	0.0018	0	0.0019	0.0019	0	0.0019
	Rosidae	pentamerous	pentamerous	1	pentamerous	0.9991 (0.9982-0.9997)	***		ORDER	-262.3	1	526.59	526.6	8.24	0.01	0.0024		0.0024	0.0024		0.0024		95% ub	1	2	0.0031	0	0.0031	0.0031	0	0.0031
	Malvidae	pentamerous	pentamerous	1	pentamerous	0.9986 (0.9969-0.9999)	***
	Fabidae	pentamerous	pentamerous	1	pentamerous	0.9969 (0.9917-1.0000)	***
234_A. Perianth differentiation (binary) (D2d)
	Angiospermae	undifferentiated	undifferentiated	1	undifferentiated	0.9991 (0.9969-1.0000)	***		Summary of ML model comparisons										Summary of rjMCMC results
	Mesangiospermae	undifferentiated	undifferentiated	1	undifferentiated	0.9984 (0.9911-1.0000)	***
	Magnoliidae	undifferentiated / differentiated	undifferentiated	0.9999	undifferentiated	0.9798 (0.9212-0.9999)	*		Model	LogL	Npar	AIC	AICc	DeltaAICc	w	q01	q10		Model_str	Model	NrSamples	PostProb
	Monocotyledoneae	undifferentiated	undifferentiated	1	undifferentiated	0.9986 (0.9966-0.9999)	***		ARD	-199.39	2	402.77	402.79	1.38	0.33	0.0045	0.0015		0 1	ARD	70214	0.78
	Eudicotyledoneae	undifferentiated	undifferentiated	0.9899	undifferentiated	0.5595 (0.0805-1.0000)	*		ARDeq**	-198.69	2	401.39	401.4	0	0.67	0.0045	0.0015		0 0	ER	19786	0.22
	Commelinidae	undifferentiated	undifferentiated	1	undifferentiated	0.9737 (0.869-1.000)	**		ER	-208.5	1	419	419	17.6	0	0.0025	0.0025
	Pentapetalae	differentiated	differentiated	0.9479	differentiated	0.9719 (0.932-1.000)	**		UNI01	-225.54	1	453.09	453.09	51.69	0	0.0086				Npar	Nzero	q01	q10
	Superasteridae	differentiated	differentiated	0.9492	differentiated	0.8762 (0.3877-1.0000)	*		UNI10	-234.01	1	470.02	470.02	68.62	0		0.0034		mean	1.8	0	0.0042	0.0017
	Asteridae	differentiated	differentiated	0.9982	differentiated	0.9993 (0.9982-1.0000)	***												95% lb	1	0	0.0019	0.0008
	Lamiidae	differentiated	differentiated	0.9999	differentiated	0.9945 (0.9861-1.0000)	***												95% ub	2	0	0.0063	0.0029
	Campanulidae	differentiated	differentiated	1	differentiated	0.9967 (0.9915-0.9999)	***
	Superrosidae	differentiated	differentiated	0.9921	differentiated	0.9833 (0.9644-1.0000)	***
	Rosidae	differentiated	differentiated	0.9953	differentiated	0.968 (0.8755-1.0000)	**
	Malvidae	differentiated	differentiated	0.9989	differentiated	0.9649 (0.9097-0.9988)	**
	Fabidae	differentiated	differentiated	0.9872	undifferentiated	0.6067 (0.0216-0.9692)	*
204_A. Fusion of perianth (D2c)
	Angiospermae	free (<5%)	free (<5%)	1	free (<5%)	0.9981 (0.9961-0.9998)	***		Summary of ML model comparisons										Summary of rjMCMC results
	Mesangiospermae	free (<5%)	free (<5%)	1	free (<5%)	1 (0.9999-1.0000)	***
	Magnoliidae	free (<5%)	free (<5%)	0.9999	free (<5%)	0.9828 (0.9646-0.9973)	***		Model	LogL	Npar	AIC	AICc	DeltaAICc	w	q01	q10		Model_str	Model	NrSamples	PostProb
	Monocotyledoneae	free (<5%)	free (<5%)	0.9999	free (<5%)	0.9921 (0.9854-0.9975)	***		ARD	-224.91	2	453.83	453.84	1.38	0.21	0.0044	0.0035		0 0	ER	89959	1
	Eudicotyledoneae	free (<5%)	free (<5%)	1	free (<5%)	0.999 (0.9978-0.9998)	***		ARDeq*	-224.22	2	452.45	452.46	0	0.41	0.0044	0.0035		0 1	ARD	39	0
	Commelinidae	free (<5%)	free (<5%)	0.9989	free (<5%)	0.9109 (0.8659-0.9516)	**		ER	-225.3	1	452.6	452.6	0.14	0.38	0.0042	0.0042		0 Z	UNI01	1	0
	Pentapetalae	free (<5%) / fused (>5%)	free (<5%)	0.9995	free (<5%)	0.8925 (0.8105-0.9555)	*		UNI01	-236	1	473.99	474	21.54	0	0.0049			Z 0	UNI10	1	0
	Superasteridae	free (<5%) / fused (>5%)	free (<5%)	0.9935	fused (>5%)	0.6401 (0.0686-0.8647)	*		UNI10	-236.58	1	475.16	475.16	22.7	0		0.0081
	Asteridae	free (<5%)	free (<5%)	0.8548	fused (>5%)	0.915 (0.8544-0.9615)	*													Npar	Nzero	q01	q10
	Lamiidae	free (<5%) / fused (>5%)	fused (>5%)	0.9552	fused (>5%)	0.9587 (0.9111-0.9932)	*												mean	1	0	0.0044	0.0044
	Campanulidae	fused (>5%)	fused (>5%)	0.94	fused (>5%)	0.9741 (0.9473-0.9951)	**												95% lb	1	0	0.0033	0.0033
	Superrosidae	free (<5%) / fused (>5%)	free (<5%)	0.9995	free (<5%)	0.9728 (0.9600-0.9869)	**												95% ub	1	0	0.0056	0.0056
	Rosidae	free (<5%) / fused (>5%)	free (<5%)	0.9995	free (<5%)	0.973 (0.9596-0.9849)	**
	Malvidae	free (<5%)	free (<5%)	0.9986	free (<5%)	0.9505 (0.9152-0.9825)	**
	Fabidae	free (<5%)	free (<5%)	1	free (<5%)	0.9877 (0.9762-0.9968)	***
207_A. Symmetry of perianth (binary) (D2d)
	Angiospermae	actinomorphic	actinomorphic	1	actinomorphic	0.998 (0.993-1.000)	***		Summary of ML model comparisons										Summary of rjMCMC results
	Mesangiospermae	actinomorphic	actinomorphic	1	actinomorphic	0.9999 (0.9997-1.0000)	***
	Magnoliidae	actinomorphic	actinomorphic	1	actinomorphic	0.9955 (0.9792-1.0000)	***		Model	LogL	Npar	AIC	AICc	DeltaAICc	w	q01	q10		Model_str	Model	NrSamples	PostProb
	Monocotyledoneae	actinomorphic	actinomorphic	0.9997	actinomorphic	0.9504 (0.8805-0.9917)	**		ARD	-211.59	2	427.17	427.19	1.37	0.33	0.0014	0.0062		0 0	ER	45835	0.51
	Eudicotyledoneae	actinomorphic	actinomorphic	1	actinomorphic	0.9973 (0.9883-1.0000)	***		ARDeq**	-210.9	2	425.8	425.81	0	0.67	0.0014	0.0062		0 1	ARD	44165	0.49
	Commelinidae	actinomorphic	actinomorphic	0.9953	actinomorphic	0.7976 (0.3366-0.9963)	*		ER	-223.67	1	449.33	449.34	23.53	0	0.0019	0.0019
	Pentapetalae	actinomorphic	actinomorphic	1	actinomorphic	0.9997 (0.9987-1.0000)	***		UNI01	-1000000	1	2000002	2e+06	1.99958e+06	0	0.0021				Npar	Nzero	q01	q10
	Superasteridae	actinomorphic	actinomorphic	1	actinomorphic	0.9978 (0.9912-1.0000)	***		UNI10	-219.37	1	440.74	440.75	14.93	0		0.0167		mean	1.5	0	0.0015	0.0038
	Asteridae	actinomorphic	actinomorphic	1	actinomorphic	0.999 (0.9964-1.0000)	***												95% lb	1	0	0.001	0.0010
	Lamiidae	actinomorphic	actinomorphic	0.9959	actinomorphic	0.9241 (0.6873-0.9998)	**												95% ub	2	0	0.002	0.0083
	Campanulidae	actinomorphic	actinomorphic	0.9999	actinomorphic	0.9901 (0.9589-1.0000)	***
	Superrosidae	actinomorphic	actinomorphic	1	actinomorphic	0.9986 (0.9961-1.0000)	***
	Rosidae	actinomorphic	actinomorphic	1	actinomorphic	0.9909 (0.9690-0.9998)	***
	Malvidae	actinomorphic	actinomorphic	0.9997	actinomorphic	0.972 (0.8571-1.0000)	**
	Fabidae	actinomorphic	actinomorphic	1	actinomorphic	0.9793 (0.9017-1.0000)	**
301_B. Number of fertile stamens (3-state) (D2c)
	Angiospermae	more than ten (>10)	more than ten (>10)	1	more than ten (>10)	0.8374 (0.107-1.000)	*		Summary of ML model comparisons														Summary of rjMCMC results
	Mesangiospermae	one to five (1-5) / more than ten (>10)	more than ten (>10)	1	more than ten (>10)	0.8152 (0.0011-1.0000)	*
	Magnoliidae	more than ten (>10)	more than ten (>10)	1	more than ten (>10)	0.9195 (0.544-1.000)	**		Model	LogL	Npar	AIC	AICc	DeltaAICc	w	q01	q02	q10	q12	q20	q21		Model_str	Model	NrSamples	PostProb
	Monocotyledoneae	six to ten (6-10)	six to ten (6-10)	0.5427	six to ten (6-10)	0.9892 (0.9765-0.9966)	***		ARD	-491.49	6	994.98	995.08	2.2	0.25	0.0004	0.0003	0.0046	0.0008	0.0045	0.0087		0 0 1 0 1 1		31326	0.35
	Eudicotyledoneae	one to five (1-5) / six to ten (6-10)	more than ten (>10)	1	more than ten (>10)	0.8171 (0.01-1.00)	*		ARDeq**	-490.39	6	992.78	992.89	0	0.75	0.0004	0.0003	0.0046	0.0008	0.0046	0.0087		0 0 1 1 1 1		11129	0.12
	Commelinidae	six to ten (6-10)	six to ten (6-10)	0.9998	six to ten (6-10)	0.9556 (0.53-1.00)	**		ER	-537.6	1	1077.2	1077.2	84.32	0	0.0027	0.0027	0.0027	0.0027	0.0027	0.0027		0 0 1 0 1 2		10508	0.12
	Pentapetalae	six to ten (6-10)	more than ten (>10)	1	more than ten (>10)	0.8154 (0.0005-1.0000)	*		SYM	-530.07	3	1066.15	1066.18	73.29	0	0.0039	0.0006	0.0039	0.0039	0.0006	0.0039		0 0 1 Z 1 1		8629	0.1
	Superasteridae	six to ten (6-10)	more than ten (>10)	1	more than ten (>10)	0.8223 (0.0222-1.0000)	*		SYMeq	-529.24	3	1064.49	1064.52	71.63	0	0.0039	0.0006	0.0039	0.004	0.0006	0.004		0 Z 0 0 1 1		5444	0.06
	Asteridae	one to five (1-5) / six to ten (6-10)	more than ten (>10)	0.9994	more than ten (>10)	0.905 (0.5989-0.9999)	*		ORD	-508.62	4	1025.23	1025.28	32.4	0	0.0007		0.0061	0.0043		0.0075
	Lamiidae	one to five (1-5)	one to five (1-5)	0.9994	one to five (1-5)	0.9847 (0.9687-0.9970)	***		ORDeq	-508.11	4	1024.23	1024.28	31.39	0	0.0008		0.006	0.0043		0.0073			Npar	Nzero	q01	q02	q10	q12	q20	q21
	Campanulidae	one to five (1-5)	one to five (1-5)	0.9957	one to five (1-5)	0.9876 (0.9678-0.9990)	***		ORDSYM	-533.66	2	1071.33	1071.34	78.46	0	0.0043		0.0043	0.0045		0.0045		mean	2.2	0.4	0.0005	0.0004	0.0049	0.0012	0.0052	0.0061
	Superrosidae	six to ten (6-10)	more than ten (>10)	1	more than ten (>10)	0.8139 (0.004-1.000)	*		ORDSYMeq	-532.78	2	1069.56	1069.58	76.69	0	0.0043		0.0043	0.0045		0.0045		95% lb	2	0	0.0000	0.0000	0.0019	0.0000	0.0037	0.0038
	Rosidae	six to ten (6-10)	more than ten (>10)	0.9999	more than ten (>10)	0.8019 (0.0081-0.9987)	*		ORDER	-533.69	1	1069.38	1069.39	76.5	0	0.0044		0.0044	0.0044		0.0044		95% ub	3	1	0.0016	0.0008	0.0064	0.0047	0.0067	0.0095
	Malvidae	six to ten (6-10)	more than ten (>10)	0.9346	six to ten (6-10)	0.5333 (0.0000-0.9896)	*
	Fabidae	six to ten (6-10)	more than ten (>10)	1	more than ten (>10)	0.817 (0.0069-1.0000)	*
301_C. Number of fertile stamens (binary) (D2c)
	Angiospermae	more than six (>6)	more than six (>6)	1	more than six (>6)	1 (0.9999-1.0000)	***		Summary of ML model comparisons										Summary of rjMCMC results
	Mesangiospermae	one to six (1-6) / more than six (>6)	more than six (>6)	1	more than six (>6)	0.9892 (0.9525-1.0000)	**
	Magnoliidae	one to six (1-6) / more than six (>6)	more than six (>6)	1	more than six (>6)	0.9999 (0.9997-1.0000)	**		Model	LogL	Npar	AIC	AICc	DeltaAICc	w	q01	q10		Model_str	Model	NrSamples	PostProb
	Monocotyledoneae	one to six (1-6)	more than six (>6)	0.5725	one to six (1-6)	0.975 (0.9426-0.9943)	*		ARD	-288.16	2	580.33	580.34	1.39	0.33	0.0005	0.0059		0 1	ARD	90000	1
	Eudicotyledoneae	one to six (1-6)	more than six (>6)	0.9998	more than six (>6)	0.9896 (0.9561-1.0000)	**		ARDeq**	-287.47	2	578.94	578.96	0	0.67	0.0005	0.0059
	Commelinidae	one to six (1-6)	one to six (1-6)	1	one to six (1-6)	0.9872 (0.9720-0.9985)	***		ER	-323.09	1	648.19	648.19	69.24	0	0.0031	0.0031			Npar	Nzero	q01	q10
	Pentapetalae	more than six (>6)	more than six (>6)	1	more than six (>6)	1 (1-1)	***		UNI01	-362.46	1	726.93	726.93	147.98	0	0.0046			mean	2	0	0.0006	0.0058
	Superasteridae	more than six (>6)	more than six (>6)	1	more than six (>6)	1 (0.9998-1.0000)	***		UNI10	-327.51	1	657.02	657.02	78.07	0		0.0074		95% lb	2	0	0.0002	0.0047
	Asteridae	one to six (1-6) / more than six (>6)	more than six (>6)	0.9999	more than six (>6)	0.9947 (0.9822-1.0000)	**												95% ub	2	0	0.0011	0.0070
	Lamiidae	one to six (1-6)	one to six (1-6)	0.9987	one to six (1-6)	0.9902 (0.9797-0.9981)	***
	Campanulidae	one to six (1-6)	one to six (1-6)	0.9926	one to six (1-6)	0.9948 (0.9889-0.9991)	***
	Superrosidae	more than six (>6)	more than six (>6)	1	more than six (>6)	1 (0.9999-1.0000)	***
	Rosidae	more than six (>6)	more than six (>6)	1	more than six (>6)	0.9964 (0.9930-0.9992)	***
	Malvidae	more than six (>6)	more than six (>6)	1	more than six (>6)	0.9996 (0.9989-1.0000)	***
	Fabidae	more than six (>6)	more than six (>6)	1	more than six (>6)	1 (0.9999-1.0000)	***
330_A. Androecium structural phyllotaxy (binary) (D2d)
	Angiospermae	whorled / spiral	whorled	1	whorled	0.9267 (0.0184-1.0000)	*		Summary of ML model comparisons										Summary of rjMCMC results
	Mesangiospermae	whorled / spiral	whorled	1	whorled	0.9627 (0.9209-1.0000)	*
	Magnoliidae	whorled / spiral	whorled	1	whorled	0.924 (0.0274-1.0000)	*		Model	LogL	Npar	AIC	AICc	DeltaAICc	w	q01	q10		Model_str	Model	NrSamples	PostProb
	Monocotyledoneae	whorled	whorled	1	whorled	0.9987 (0.9938-1.0000)	***		ARD	-60.11	2	124.23	124.24	2.01	0.13	0.0004	0		0 0	ER	64260	0.71
	Eudicotyledoneae	whorled	whorled	1	whorled	0.9753 (0.9781-1.0000)	***		ARDeq	-59.42	2	122.84	122.86	0.62	0.25	0.0004	0		0 Z	UNI01	20658	0.23
	Commelinidae	whorled	whorled	1	whorled	0.9984 (0.9941-1.0000)	***		ER	-60.36	1	122.73	122.73	0.5	0.27	0.0004	0.0004		0 1	ARD	5082	0.06
	Pentapetalae	whorled	whorled	1	whorled	0.9999 (0.9999-1.0000)	***		UNI01*	-60.11	1	122.23	122.23	0	0.35	0.0004
	Superasteridae	whorled	whorled	1	whorled	0.9994 (0.9984-1.0000)	***		UNI10	-76.39	1	154.79	154.79	32.56	0		0.0209			Npar	Nzero	q01	q10
	Asteridae	whorled	whorled	1	whorled	0.9997 (0.999-1.000)	***												mean	1.1	0.2	0.0004	0.0008
	Lamiidae	whorled	whorled	1	whorled	0.999 (0.9957-1.0000)	***												95% lb	1	0	0.0002	0.0000
	Campanulidae	whorled	whorled	1	whorled	0.9991 (0.997-1.000)	***												95% ub	2	1	0.0007	0.0052
	Superrosidae	whorled	whorled	1	whorled	0.9998 (0.9994-1.0000)	***
	Rosidae	whorled	whorled	1	whorled	0.9992 (0.9948-1.0000)	***
	Malvidae	whorled	whorled	1	whorled	0.999 (0.9966-1.0000)	***
	Fabidae	whorled	whorled	1	whorled	0.9998 (0.9996-1.0000)	***
331_A. Number of androecium structural whorls (3-state) (D2c)
	Angiospermae	more than two (>2)	two (2)	1	more than two (>2)	0.626 (0.0000-0.9992)	*		Summary of ML model comparisons														Summary of rjMCMC results
	Mesangiospermae	more than two (>2)	two (2)	0.9999	two (2)	0.517 (0.0081-1.0000)	*
	Magnoliidae	more than two (>2)	two (2)	0.9917	more than two (>2)	0.8254 (0.0000-0.9974)	*		Model	LogL	Npar	AIC	AICc	DeltaAICc	w	q01	q02	q10	q12	q20	q21		Model_str	Model	NrSamples	PostProb
	Monocotyledoneae	two (2)	two (2)	1	two (2)	0.8448 (0.5214-1.0000)	**		ARD	-230.47	6	472.95	473.06	0.19	0.32	0	0.0001	0.0067	0.0006	0	0.0107		Z 0 1 0 0 1		14061	0.16
	Eudicotyledoneae	two (2) / more than two (>2)	two (2)	1	two (2)	0.8874 (0.6473-1.0000)	*		ARDeq	-230.91	6	473.82	473.92	1.06	0.21	0	0.0001	0.0062	0.0008	0	0.0015		Z Z 0 1 1 0		13758	0.15
	Commelinidae	two (2)	two (2)	1	two (2)	0.9839 (0.9603-1.0000)	***		ER	-280.24	1	562.49	562.49	89.63	0	0.0017	0.0017	0.0017	0.0017	0.0017	0.0017		Z Z 0 1 Z 0		12287	0.14
	Pentapetalae	one (1)	two (2)	1	two (2)	0.9994 (0.9961-1.0000)	**		SYM	-254.21	3	514.43	514.46	41.59	0	0.0035	0.0001	0.0035	0.001	0.0001	0.001		Z 0 1 0 Z 1		10864	0.12
	Superasteridae	one (1)	two (2)	1	two (2)	0.9919 (0.9781-1.0000)	**		SYMeq	-253.16	3	512.33	512.36	39.49	0	0.0035	0.0001	0.0035	0.001	0.0001	0.001		Z Z 0 1 Z 1		4741	0.05
	Asteridae	one (1)	two (2)	1	two (2)	0.9889 (0.9509-1.0000)	**		ORD	-233.46	4	474.93	474.98	2.11	0.12	0		0.0064	0.0009		0.002
	Lamiidae	one (1)	one (1)	0.9986	one (1)	0.9889 (0.9750-0.9993)	***		ORDeq*	-232.41	4	472.82	472.87	0	0.35	0		0.0064	0.0009		0.0017			Npar	Nzero	q01	q02	q10	q12	q20	q21
	Campanulidae	one (1)	one (1)	0.9916	one (1)	0.992 (0.9830-0.9994)	***		ORDSYM	-255.12	2	514.24	514.26	41.39	0	0.0036		0.0036	0.0013		0.0013		mean	2	1.9	0.0001	0.0002	0.0067	0.0007	0.0009	0.0052
	Superrosidae	one (1)	two (2)	1	two (2)	0.9987 (0.9966-1.0000)	**		ORDSYMeq	-254.05	2	512.09	512.11	39.24	0	0.0036		0.0036	0.0013		0.0013		95% lb	2	0	0.0000	0.0000	0.0051	0.0001	0.0000	0.0000
	Rosidae	one (1)	two (2)	1	two (2)	0.9929 (0.9825-1.0000)	**		ORDER	-260.45	1	522.9	522.9	50.04	0	0.0029		0.0029	0.0029		0.0029		95% ub	2	3	0.0005	0.0006	0.0084	0.0015	0.0059	0.0082
	Malvidae	one (1) / two (2)	two (2)	1	two (2)	0.987 (0.9632-1.0000)	**
	Fabidae	one (1)	two (2)	1	two (2)	0.9984 (0.9944-1.0000)	**
332_A. Androecium structural merism (4-state) (D2c)
	Angiospermae	trimerous	tetramerous	0.9846	trimerous	0.9218 (0.7064-0.9989)	*		Summary of ML model comparisons																				Summary of rjMCMC results
	Mesangiospermae	trimerous	tetramerous	0.9215	trimerous	0.9384 (0.7262-1.0000)	*
	Magnoliidae	trimerous	tetramerous	0.8424	trimerous	0.9063 (0.6716-1.0000)	*		Model	LogL	Npar	AIC	AICc	DeltaAICc	w	q01	q02	q03	q10	q12	q13	q20	q21	q23	q30	q31	q32		Model_str	Model	NrSamples	PostProb
	Monocotyledoneae	trimerous	trimerous	0.5155	trimerous	0.9 (0.5815-1.0000)	**		ARD	-222.8	12	469.59	469.99	348.76	0	0.0071	0	0	0.0005	0.0005	0.0005	0	0.0003	0.0036	0.0007	0.0003	0.0022		0 Z Z Z 0 Z 0 0 0 Z Z 0		6257	0.07
	Eudicotyledoneae	trimerous / tetramerous / pentamerous	tetramerous	0.9628	tetramerous	0.6781 (0.0000-0.9934)	*		ARDeq	-221.46	12	466.92	467.32	346.09	0	0.0069	0	0	0.0005	0.0005	0.0004	0	0.0003	0.0035	0.0007	0.0003	0.0022		Z Z Z Z 0 Z 0 0 0 Z Z 0		5255	0.06
[truncated: 154 more rows]
[truncated: 10 more columns]

## Sheet: D
Character	Node	MP state(s)	ML state	Prob	rjMCMC state	Prob (mean and 95% HPD)	Confidence
100_A. Functional sex of flowers (D2d)
[truncated: 431 more rows]
[truncated: 10 more columns]

## Sheet: E
Character	Node	MP state(s)	ML state	Prob	rjMCMC state	Prob (mean and 95% HPD)	Confidence
[truncated: 432 more rows]
[truncated: 10 more columns]

[truncated: 5 more sheets: A200, B200, C200, D200, E200]
