# Supplementary material for: The ancestral flower of angiosperms and its early diversification
Source: Nat Commun. 2017 Aug 1;8:16047. doi: 10.1038/ncomms16047 (PMC5543309; doi:10.1038/ncomms16047)
Supplement: Supplementary Data 12 [file ncomms16047-s13.txt]

#NEXUS
Begin taxa;
	Dimensions ntax=798;
	Taxlabels
		Abatia
		'Abelia_spp.'
		Abrophyllum
		'Acacia_spp.'
		Acalypha_californica
		Acanthochlamys_bracteata
		Acanthus
		Acharia_tragodes
		Acicarpha
		Acorus_gramineus
		Acridocarpus_natalitius
		'Actinidia_spp.'
		Adoxa_moschatellina
		'Aesculus_spp.'
		Aextoxicon_punctatum
		Afrostyrax_lepidophyllus
		Agave
		Ailanthus_altissima
		Akebia_quinata
		'Alangium_spp.'
		Albizia_julibrissin
		Alisma
		Allium
		Alluaudia
		Alnus
		Alophia_drummondii
		Alseuosmia
		'Alstroemeria_spp.'
		'Altingia_spp.'
		Amborella_trichopoda
		'Anagallis_spp.'
		'Anarthria_spp.'
		Ancistrocladus
		'Androsace_spp.'
		Androstachys_johnsonii
		Anemopsis_californica
		Anethum
		Aneulophus_africanus
		Angelica
		Anigozanthos_flavidus
		Anisophyllea_fallax
		Anisoptera_marginata
		Annona_muricata
		Anopterus
		Anredera_cordifolia
		Antirrhinum
		Aphanopetalum_resinosum
		Aphloia_theiformis
		Apium_graveolens
		Aporusa
		Arabidopsis_thaliana
		Aralia
		Aralidium
		Arbutus
		Archytaea
		Arctopus
		Argophyllum
		Aristea_glauca
		Aristolochia_macrophylla
		'Asarum_spp.'
		Ascarina
		Asimina_triloba
		'Asparagus_spp.'
		Asteropeia_micraster
		Astragalus_membranaceus
		Atherosperma
		Atropa
		Atuna
		Aucuba_japonica
		Austrobaileya_scandens
		Austrobuxus
		Averrhoa_carambola
		Azorella
		Balanops_vieillardi
		Barbacenia_elegans
		'Barbeuia_spp.'
		Barbeya_oleoides
		Barleria_prionitis
		Barnadesia
		'Barringtonia_spp.'
		Basella
		Batis_maritima
		'Bauhinia_spp.'
		Beaucarnea
		'Begonia_spp.'
		Berberidopsis_corallina
		Bergia
		Berzelia_lanuginosa
		Beta
		Bhesa_paniculata
		Biebersteinia_orphanidis
		Bischofia_javanica
		Bixa
		Blandfordia
		'Boehmeria_spp.'
		'Bomarea_spp.'
		'Bombax_spp.'
		Bonnetia
		'Boopis_spp.'
		Borago_officinalis
		Borya_septentrionalis
		'Bougainvillea_spp.'
		Brasenia_schreberi
		'Brassica_spp.'
		Brexia_madagascariensis
		Bruguiera
		Brunellia_acutangula
		Brunia
		'Bulbine_spp.'
		'Burmannia_spp.'
		Bursera_inaguensis
		Buxus_sempervirens
		'Byblis_spp.'
		Byrsonima_crassifolia
		Cabomba_caroliniana
		Calceolaria
		'Calectasia_spp.'
		'Callicarpa_spp.'
		Calophyllum
		'Calycanthus_spp.'
		Camellia_sinensis
		'Campanula_spp.'
		Campsis_radicans
		Camptotheca_acuminata
		Campynema_linearis
		Cananga_odorata
		Canella_winterana
		'Canna_spp.'
		Cannabis
		'Capparis_spp.'
		Carallia
		'Cardiopteris_spp.'
		Carica_papaya
		Carludovica_palmata
		Carpodetus
		Caryocar
		Caryota_mitis
		'Casearia_spp.'
		Cassipourea_lanceolata
		Casuarina
		Catalpa
		Caulophyllum_thalictroides
		'Ceanothus_spp.'
		Celastrus
		'Celosia_spp.'
		'Celtis_spp.'
		Centranthus
		Centrolepis_strigosa
		Centroplacus
		Cephalotus
		Ceratonia_siliqua
		Ceratophyllum_demersum
		Cercidiphyllum_japonicum
		Cercis_canadensis
		Cespedesia
		Chamaedorea
		Chimonanthus_praecox
		'Chloranthus_spp.'
		Choristylis
		Chrysobalanus_icaco
		'Chrysolepis_spp.'
		Cicer
		Cichorium
		'Cinnamodendron_spp.'
		Cinnamomum_camphora
		Circaeaster_agrestis
		Cissampelos_pareira
		Citronella
		'Citrus_spp.'
		Clarkia_xantiana
		Clavija
		Claytonia
		'Clethra_spp.'
		'Clidemia_spp.'
		Clusia_gundlachii
		Clutia
		Cobaea_scandens
		Coccinia_sessilifolia
		'Cocculus_spp.'
		Codiaeum
		Coffea_arabica
		'Colchicum_spp.'
		Columellia
		Conceveiba
		'Connarus_spp.'
		Corbichonia_decumbens
		Coriandrum
		Coriaria_ruscifolia
		Cornus_mas
		Corokia_cotoneaster
		'Corylopsis_spp.'
		Corynocarpus_laevigatus
		Coula_edulis
		Couroupita
		Crassula_marnierana
		Cratoxylum_cochinchinense
		'Crinodendron_spp.'
		'Crinum_spp.'
		Crispiloba
		Croizatia
		Croomia_pauciflora
		'Crossosoma_spp.'
		Crossostylis_grandiflora
		Croton
		Crypteronia_paniculata
		'Cryptocarya_spp.'
		Ctenolophon
		Cucumis
		Cucurbita
		Cupaniopsis_anacardioides
		Curtisia_dentata
		Cuscuta
		Cussonia
		Cuttsia
		Cycas
		'Cyperus_spp.'
		Cyphia
		'Cypripedium_spp.'
		Cyrilla_racemiflora
		Dalechampia
		Dampiera
		'Danthonia_spp.'
		Dapania
		Daphnandra
		'Daphniphyllum_spp.'
		Dasypogon_bromeliifolius
		'Datisca_spp.'
		Daucus
		Davidsonia
		Decaisnea
		Degeneria_vitiensis
		Delarbrea_michieana
		Delosperma
		Dendrosicyos_socotranus
		Denhamia
		Desfontainia_spinosa
		Dialypetalum
		Dicella
		'Dicentra_spp.'
		Dichapetalum
		Didymeles_perrieri
		Diervilla
		'Dillenia_spp.'
		'Dioscorea_spp.'
		'Diospyros_spp.'
		Dipelta
		Dipentodon
		'Dipsacus_spp.'
		Dirachma_socotrana
		Disanthus_cercidifolius
		Dissiliaria
		'Donatia_spp.'
		'Doryphora_spp.'
		Dovyalis
		'Drimys_spp.'
		'Drosera_spp.'
		Drosophyllum
		Drypetes
		Dudleya_viscida
		Durandea
		Durio_zibethinus
		Ecdeiocolea_monostachya
		Echinops
		Ehretia
		'Elaeagnus_spp.'
		Elaeis
		Elaeocarpus
		Elaeodendron
		Elatine
		Eliea_articulata
		Endospermum
		Enkianthus_campanulatus
		Eremosyne_pectinata
		'Eriocaulon_spp.'
		'Erythrina_spp.'
		Erythrospermum
		'Erythroxylum_spp.'
		'Escallonia_spp.'
		Eschscholzia
		Eucalyptus
		Euclea_crispa
		'Eucnide_spp.'
		Eucommia
		Eucryphia
		Euonymus
		'Euphorbia_spp.'
		Euphronia
		Eupomatia_bennettii
		Euptelea_polyandra
		'Eurya_spp.'
		Exacum_affine
		Exbucklandia_populnea
		Fagopyrum
		'Fagus_spp.'
		Fauria
		Fendlera_rupicola
		'Ficus_spp.'
		Flacourtia
		Flagellaria_indica
		Floerkea_proserpinacoides
		Forgesia
		Forstera
		'Fouquieria_spp.'
		Frankenia
		Fuchsia_procumbens
		Gaiadendron
		'Galax_spp.'
		Galbulimima_belgraveana
		Galearia
		Galium
		Garcinia
		Garrya_elliptica
		Geissoloma_marginatum
		Gelsemium
		'Gentiana_spp.'
		'Geranium_spp.'
		Gerbera
		Gerrardina_foliosa
		'Gilia_spp.'
		Ginkgo_biloba
		Gisekia
		Gladiolus_buckerveldii
		Glaucidium_palmatum
		Glycine_max
		'Gnetum_spp.'
		Gomortega_keule
		Gomphandra
		Gonocaryum_litorale
		Goodenia
		Gossypium
		Goupia
		'Grevillea_spp.'
		Greyia_radlkoferi
		'Griselinia_spp.'
		'Grubbia_spp.'
		Guaiacum
		Guamatela_tuerckheimii
		Guizotia
		'Gunnera_spp.'
		'Gyrocarpus_spp.'
		'Gyrostemon_spp.'
		'Halesia_spp.'
		Halleria
		Halophytum
		'Haloragis_spp.'
		'Hamamelis_spp.'
		Hedera_helix
		Hedycarya_arborea
		Hedyosmum_arborescens
		'Heisteria_spp.'
		Helianthemum
		Helianthus_annuus
		'Helwingia_spp.'
		Heptacodium
		'Hernandia_spp.'
		Heteromorpha
		Heteropyxis_natalensis
		'Heuchera_spp.'
		Hevea
		Heywoodia
		Hibbertia
		Hirtella
		Homalanthus
		Hordeum
		Hortonia_floribunda
		Houttuynia_cordata
		Hua_gabonii
		Hugonia
		Humiria_balsaminifera
		Humulus_lupulus
		Hura
		Hybanthus
		'Hydnocarpus_spp.'
		'Hydrangea_spp.'
		Hydrastis_canadensis
		'Hydrocharis_spp.'
		Hydrocotyle
		Hydrolea_ovata
		Hydrophyllum
		'Hydrostachys_spp.'
		Hymenanthera
		Hypecoum
		Hypericum_perforatum
		'Hypertelis_spp.'
		'Hypoxis_spp.'
		Icacina
		Idesia
		Idiospermum_australiense
		'Ilex_spp.'
		'Illicium_spp.'
		'Impatiens_spp.'
		'Indigofera_spp.'
		'Ipomoea_spp.'
		Iris
		'Irvingbaileya_spp.'
		Irvingia
		Itea
		Ixerba
		Ixiolirion_tataricum
		Japonolirion_osense
		Jasminum
		'Joinvillea_spp.'
		'Juglans_spp.'
		Juncus_effusus
		Justicia_americana
		Kadsura_japonica
		Kalanchoe
		Kiggelaria
		Kingdonia_uniflora
		Klainedoxa
		Koeberlinia_spinosa
		Kolkwitzia
		Krameria_ixine
		Lachnostylis
		Lacistema_aggregatum
		Lactoris_fernandeziana
		Lactuca
		'Lamium_spp.'
		Lampranthus
		Lapageria_rosea
		Lardizabala_biternata
		Larrea_tridentata
		Lasiocroton
		Laurus_nobilis
		Leea_guineensis
		Lemna
		Leonia
		Lepidobotrys
		Leycesteria
		'Licania_spp.'
		'Lilium_spp.'
		Limeum
		Limonium
		Linnaea
		Linum
		Liquidambar_styraciflua
		'Liriodendron_spp.'
		Lissocarpa_benthamii
		'Lobelia_spp.'
		Lomandra
		Lonicera
		Lophopyxis
		Lotus
		Lozania
		Luculia
		Lunania
		Luxemburgia
		'Lythrum_spp.'
		Mackinlaya
		Maesa
		'Magnolia_spp.'
		'Mahonia_spp.'
		Malesherbia_linearifolia
		Malpighia
		Mammea
		Manihot_esculenta
		Manilkara_zapota
		Maranta_bicolor
		'Marathrum_spp.'
		'Marcgravia_spp.'
		Martynia
		Mauloutchia_chapelieri
		'Mayaca_spp.'
		Maytenus
		'Mazus_spp.'
		'Medicago_spp.'
		Medusagyne_oppositifolia
		'Melanophylla_spp.'
		Melianthus
		Meliosma_veitchiorum
		Menispermum
		Mentzelia
		Menyanthes_trifoliata
		Mesua
		Metanarthecium_luteoviride
		Metasequoia
		'Metrosideros_spp.'
		Micrantheum
		Microdesmis
		'Mimosa_spp.'
		Minquartia_guianensis
		Mirabilis_jalapa
		'Misodendrum_spp.'
		Mitchella_repens
		Molineria_capitulata
		Mollugo_verticillata
		Montinia_caryophyllacea
		Morella_cerifera
		Morina
		'Morus_spp.'
		Moschopsis
		Moultonianthus
		Mouriri_cyphocarpa
		'Musa_spp.'
		Myodocarpus
		Myoporum_mauritianum
		Myrica
		Myriophyllum
		Myristica_fragrans
		'Myrothamnus_spp.'
		Myrtus
		'Najas_spp.'
		Nandina_domestica
		Nardostachys
		Nelumbo_lutea
		Neoscortechinia_kingii
		'Nepenthes_spp.'
		Nerium_oleander
		Neurada_procumbens
		'Nicotiana_spp.'
		Nitraria
		'Nolana_spp.'
		Nothofagus_antarctica
		'Nothoscordum_spp.'
		'Nuphar_spp.'
		'Nymphaea_spp.'
		Nymphoides
		'Nyssa_spp.'
		Ochanostachys_amentacea
		Ochna
		Ochroma_pyramidale
		Ochthocosmus
		Oenothera
		Olea_europaea
		Olinia
		Omphalea
		Oncidium
		Oncotheca
		'Opilia_spp.'
		Opuntia
		Orontium_aquaticum
		Oryza_sativa
		'Osyris_spp.'
		'Oxalis_spp.'
		'Pachysandra_spp.'
		Paeonia_californica
		'Panax_spp.'
		Panda
		Pangium
		Paracryphia_alticola
		Paradrypetes
		'Parnassia_spp.'
		Paropsia
		'Passiflora_spp.'
		Patrinia
		Paulownia_tomentosa
		Paxistima
		'Pedicularis_spp.'
		Pelargonium_cotyledonis
		Peltanthera
		Pennantia_corymbosa
		Pentadiplandra_brazzeana
		Pentaphragma
		Penthorum_sedoides
		'Peperomia_spp.'
		Pera_bicolor
		Pereskia_aculeata
		Peridiscus_lucidus
		Perrottetia_ovata
		'Petalonyx_spp.'
		Petalostigma
		Petrophile
		'Petrosavia_spp.'
		'Petunia_spp.'
		Peumus_boldus
		Phalaenopsis
		Phaulothamnus
		'Phelline_spp.'
		Phenakospermum_guyannense
		'Philadelphus_spp.'
		Philesia_buxifolia
		Philydrum_lanuginosum
		'Phlox_spp.'
		Phoenix_dactylifera
		'Photinia_spp.'
		Phryma
		'Phyllanthus_spp.'
		'Phyllonoma_spp.'
		Physena
		Phytolacca_americana
		'Picramnia_spp.'
		'Pilea_spp.'
		Pimelodendron
		Pinguicula
		Pinus
		'Piper_spp.'
		Pisum
		Pittosporum
		Plagiopteron
		'Plantago_spp.'
		Platanus_occidentalis
		Platysace
		Platyspermation
		Pleea_tenuifolia
		Plocosperma_buxifolium
		'Plumbago_spp.'
		Podocalyx
		Podophyllum_peltatum
		Podostemum_ceratophyllum
		Pogonophora_schomburgkiana
		Polemonium
		Poliothyrsis
		'Polygala_spp.'
		'Polygonum_spp.'
		'Polyosma_spp.'
		Polypremum_procumbens
		Polyscias
		Pontederia_cordata
		'Populus_spp.'
		'Portulaca_spp.'
		'Potamogeton_spp.'
		Primula
		Prockia
		Prunus_persica
		Pseudonemacladus
		Pseudopanax
		Pterocephalodes
		Pterostemon_rotundifolius
		Puya_raimondii
		Qualea
		'Quercus_spp.'
		Quiina
		Quillaja_saponaria
		Quintinia
		'Ranunculus_spp.'
		Raphanus_sativus
		Ravenala_madagascariensis
		Reinwardtia_indica
		Reseda
		'Restio_spp.'
		'Rhabdodendron_spp.'
		Rhamnus
		'Rhizophora_spp.'
		'Rhododendron_spp.'
		Rhodohypoxis_millioides
		'Rhodoleia_spp.'
		'Rhus_spp.'
		'Rhynchoglossum_spp.'
		'Rhynchospora_spp.'
		Ribes_aureum
		Ricinus
		Rinorea_pubiflora
		Rivina
		Roridula_gorgonias
		Roupala
		Rourea_minor
		Roussea_simplex
		Ruptiliocarpon
		Sabia
		Saccharum
		Sacoglottis
		Salix
		Sambucus
		Sanicula
		Santalum_album
		'Sarcandra_spp.'
		Sarcobatus
		Sargentodoxa
		'Sarracenia_spp.'
		Saruma
		'Sassafras_spp.'
		'Saururus_spp.'
		'Sauvagesia_spp.'
		Saxifraga
		'Scabiosa_spp.'
		'Scaevola_spp.'
		Schefflera
		Schinus
		'Schisandra_spp.'
		Schoepfia_schreberi
		'Schotia_spp.'
		'Scrophularia_spp.'
		Scyphostegia
		'Sedum_spp.'
		Sesamum
		Simmondsia_chinensis
		Sinadoxa
		'Siparuna_spp.'
		'Siphonodon_spp.'
		'Sloanea_spp.'
		Smilax_glauca
		Solanum
		Sollya_heterophylla
		'Soyauxia_spp.'
		Sparganium
		Spathiostemon
		'Spathiphyllum_spp.'
		Sphenoclea
		Sphenostemon
		'Spigelia_spp.'
		Spinacia
		'Spiraea_spp.'
		Stachyurus
		'Stackhousia_spp.'
		'Staphylea_spp.'
		Stegnosperma
		Stegolepis
		'Stellaria_spp.'
		'Sterculia_spp.'
		'Strasburgeria_spp.'
		Strelitzia
		Strychnos
		Stylidium
		Stylobasium_spathulatum
		'Styrax_spp.'
		Sullivantia_oregana
		Suregada
		Swietenia_macrophylla
		Symphonia_tanalensis
		Symphoricarpos
		'Symplocos_spp.'
		Syringa
		'Tacca_spp.'
		Tagetes
		Takhtajania_perrieri
		Talinum
		'Tamarix_spp.'
		Tapiscia_sinensis
		Tapura
		'Tasmannia_spp.'
		Tecophilaea_cyanocrocus
		'Terminalia_spp.'
		'Ternstroemia_spp.'
		Tetracarpaea_tasmanica
		Tetracentron_sinense
		Tetracera_asiatica
		Tetracoccus
		Tetradoxa
		Tetrameles_nudiflora
		'Tetramerista_spp.'
		Tetrapanax
		Tetraplasandra
		Tetrapterys_glabrifolia
		Tetrorchidium
		Thomandersia
		Thottea_tomentosa
		Thryallis
		'Thunbergia_spp.'
		Thymelaea_hirsuta
		Tinospora
		Titanotrichum_oldhamii
		Tofieldia_calyculata
		Torricellia
		Touroulia
		Tovaria_pendula
		Trachelium
		Trachycarpus_fortunei
		'Tradescantia_spp.'
		Tragopogon_dubius
		Trichilia_emetica
		Triglochin_maritima
		Trigonia
		Trigonostemon
		'Trillium_spp.'
		Trimenia_moorei
		Triosteum
		Triphyophyllum_peltatum
		Triplostegia
		Tripterygium
		Trithuria_submersa
		Trochodendron_aralioides
		'Tropaeolum_spp.'
		'Turnera_spp.'
		'Typha_spp.'
		Urtica
		'Utricularia_spp.'
		'Vaccinium_spp.'
		Vahlia_capensis
		Valdivia
		'Valeriana_spp.'
		Valerianella
		Vantanea
		Verbascum_thapsus
		'Verbena_spp.'
		'Veronica_spp.'
		'Viburnum_spp.'
		Villarsia
		'Viola_spp.'
		'Vismia_spp.'
		'Vitis_spp.'
		Viviania_marifolia
		'Vochysia_spp.'
		Vriesea
		Weigela
		Welwitschia
		Wittsteinia
		Xanthorhiza_simplicissima
		Xanthorrhoea
		Xanthosoma
		'Xerophyta_spp.'
		Xerosicyos_danguyi
		Ximenia_americana
		'Xyris_spp.'
		Yucca
		Zabelia
		Zea
		'Zelkova_spp.'
		'Zingiber_spp.'
		;
End;
Begin trees;
	Translate
		1 Abatia,
		2 'Abelia_spp.',
		3 Abrophyllum,
		4 'Acacia_spp.',
		5 Acalypha_californica,
		6 Acanthochlamys_bracteata,
		7 Acanthus,
		8 Acharia_tragodes,
		9 Acicarpha,
		10 Acorus_gramineus,
		11 Acridocarpus_natalitius,
		12 'Actinidia_spp.',
		13 Adoxa_moschatellina,
		14 'Aesculus_spp.',
		15 Aextoxicon_punctatum,
		16 Afrostyrax_lepidophyllus,
		17 Agave,
		18 Ailanthus_altissima,
		19 Akebia_quinata,
		20 'Alangium_spp.',
		21 Albizia_julibrissin,
		22 Alisma,
		23 Allium,
		24 Alluaudia,
		25 Alnus,
		26 Alophia_drummondii,
		27 Alseuosmia,
		28 'Alstroemeria_spp.',
		29 'Altingia_spp.',
		30 Amborella_trichopoda,
		31 'Anagallis_spp.',
		32 'Anarthria_spp.',
		33 Ancistrocladus,
		34 'Androsace_spp.',
		35 Androstachys_johnsonii,
		36 Anemopsis_californica,
		37 Anethum,
		38 Aneulophus_africanus,
		39 Angelica,
		40 Anigozanthos_flavidus,
		41 Anisophyllea_fallax,
		42 Anisoptera_marginata,
		43 Annona_muricata,
		44 Anopterus,
		45 Anredera_cordifolia,
		46 Antirrhinum,
		47 Aphanopetalum_resinosum,
		48 Aphloia_theiformis,
		49 Apium_graveolens,
		50 Aporusa,
		51 Arabidopsis_thaliana,
		52 Aralia,
		53 Aralidium,
		54 Arbutus,
		55 Archytaea,
		56 Arctopus,
		57 Argophyllum,
		58 Aristea_glauca,
		59 Aristolochia_macrophylla,
		60 'Asarum_spp.',
		61 Ascarina,
		62 Asimina_triloba,
		63 'Asparagus_spp.',
		64 Asteropeia_micraster,
		65 Astragalus_membranaceus,
		66 Atherosperma,
		67 Atropa,
		68 Atuna,
		69 Aucuba_japonica,
		70 Austrobaileya_scandens,
		71 Austrobuxus,
		72 Averrhoa_carambola,
		73 Azorella,
		74 Balanops_vieillardi,
		75 Barbacenia_elegans,
		76 'Barbeuia_spp.',
		77 Barbeya_oleoides,
		78 Barleria_prionitis,
		79 Barnadesia,
		80 'Barringtonia_spp.',
		81 Basella,
		82 Batis_maritima,
		83 'Bauhinia_spp.',
		84 Beaucarnea,
		85 'Begonia_spp.',
		86 Berberidopsis_corallina,
		87 Bergia,
		88 Berzelia_lanuginosa,
		89 Beta,
		90 Bhesa_paniculata,
		91 Biebersteinia_orphanidis,
		92 Bischofia_javanica,
		93 Bixa,
		94 Blandfordia,
		95 'Boehmeria_spp.',
		96 'Bomarea_spp.',
		97 'Bombax_spp.',
		98 Bonnetia,
		99 'Boopis_spp.',
		100 Borago_officinalis,
		101 Borya_septentrionalis,
		102 'Bougainvillea_spp.',
		103 Brasenia_schreberi,
		104 'Brassica_spp.',
		105 Brexia_madagascariensis,
		106 Bruguiera,
		107 Brunellia_acutangula,
		108 Brunia,
		109 'Bulbine_spp.',
		110 'Burmannia_spp.',
		111 Bursera_inaguensis,
		112 Buxus_sempervirens,
		113 'Byblis_spp.',
		114 Byrsonima_crassifolia,
		115 Cabomba_caroliniana,
		116 Calceolaria,
		117 'Calectasia_spp.',
		118 'Callicarpa_spp.',
		119 Calophyllum,
		120 'Calycanthus_spp.',
		121 Camellia_sinensis,
		122 'Campanula_spp.',
		123 Campsis_radicans,
		124 Camptotheca_acuminata,
		125 Campynema_linearis,
		126 Cananga_odorata,
		127 Canella_winterana,
		128 'Canna_spp.',
		129 Cannabis,
		130 'Capparis_spp.',
		131 Carallia,
		132 'Cardiopteris_spp.',
		133 Carica_papaya,
		134 Carludovica_palmata,
		135 Carpodetus,
		136 Caryocar,
		137 Caryota_mitis,
		138 'Casearia_spp.',
		139 Cassipourea_lanceolata,
		140 Casuarina,
		141 Catalpa,
		142 Caulophyllum_thalictroides,
		143 'Ceanothus_spp.',
		144 Celastrus,
		145 'Celosia_spp.',
		146 'Celtis_spp.',
		147 Centranthus,
		148 Centrolepis_strigosa,
		149 Centroplacus,
		150 Cephalotus,
		151 Ceratonia_siliqua,
		152 Ceratophyllum_demersum,
		153 Cercidiphyllum_japonicum,
		154 Cercis_canadensis,
		155 Cespedesia,
		156 Chamaedorea,
		157 Chimonanthus_praecox,
		158 'Chloranthus_spp.',
		159 Choristylis,
		160 Chrysobalanus_icaco,
		161 'Chrysolepis_spp.',
		162 Cicer,
		163 Cichorium,
		164 'Cinnamodendron_spp.',
		165 Cinnamomum_camphora,
		166 Circaeaster_agrestis,
		167 Cissampelos_pareira,
		168 Citronella,
		169 'Citrus_spp.',
		170 Clarkia_xantiana,
		171 Clavija,
		172 Claytonia,
		173 'Clethra_spp.',
		174 'Clidemia_spp.',
		175 Clusia_gundlachii,
		176 Clutia,
		177 Cobaea_scandens,
		178 Coccinia_sessilifolia,
		179 'Cocculus_spp.',
		180 Codiaeum,
		181 Coffea_arabica,
		182 'Colchicum_spp.',
		183 Columellia,
		184 Conceveiba,
		185 'Connarus_spp.',
		186 Corbichonia_decumbens,
		187 Coriandrum,
		188 Coriaria_ruscifolia,
		189 Cornus_mas,
		190 Corokia_cotoneaster,
		191 'Corylopsis_spp.',
		192 Corynocarpus_laevigatus,
		193 Coula_edulis,
		194 Couroupita,
		195 Crassula_marnierana,
		196 Cratoxylum_cochinchinense,
		197 'Crinodendron_spp.',
		198 'Crinum_spp.',
		199 Crispiloba,
		200 Croizatia,
		201 Croomia_pauciflora,
		202 'Crossosoma_spp.',
		203 Crossostylis_grandiflora,
		204 Croton,
		205 Crypteronia_paniculata,
		206 'Cryptocarya_spp.',
		207 Ctenolophon,
		208 Cucumis,
		209 Cucurbita,
		210 Cupaniopsis_anacardioides,
		211 Curtisia_dentata,
		212 Cuscuta,
		213 Cussonia,
		214 Cuttsia,
		215 Cycas,
		216 'Cyperus_spp.',
		217 Cyphia,
		218 'Cypripedium_spp.',
		219 Cyrilla_racemiflora,
		220 Dalechampia,
		221 Dampiera,
		222 'Danthonia_spp.',
		223 Dapania,
		224 Daphnandra,
		225 'Daphniphyllum_spp.',
		226 Dasypogon_bromeliifolius,
		227 'Datisca_spp.',
		228 Daucus,
		229 Davidsonia,
		230 Decaisnea,
		231 Degeneria_vitiensis,
		232 Delarbrea_michieana,
		233 Delosperma,
		234 Dendrosicyos_socotranus,
		235 Denhamia,
		236 Desfontainia_spinosa,
		237 Dialypetalum,
		238 Dicella,
		239 'Dicentra_spp.',
		240 Dichapetalum,
		241 Didymeles_perrieri,
		242 Diervilla,
		243 'Dillenia_spp.',
		244 'Dioscorea_spp.',
		245 'Diospyros_spp.',
		246 Dipelta,
		247 Dipentodon,
		248 'Dipsacus_spp.',
		249 Dirachma_socotrana,
		250 Disanthus_cercidifolius,
		251 Dissiliaria,
		252 'Donatia_spp.',
		253 'Doryphora_spp.',
		254 Dovyalis,
		255 'Drimys_spp.',
		256 'Drosera_spp.',
		257 Drosophyllum,
		258 Drypetes,
		259 Dudleya_viscida,
		260 Durandea,
		261 Durio_zibethinus,
		262 Ecdeiocolea_monostachya,
		263 Echinops,
		264 Ehretia,
		265 'Elaeagnus_spp.',
		266 Elaeis,
		267 Elaeocarpus,
		268 Elaeodendron,
		269 Elatine,
		270 Eliea_articulata,
		271 Endospermum,
		272 Enkianthus_campanulatus,
		273 Eremosyne_pectinata,
		274 'Eriocaulon_spp.',
		275 'Erythrina_spp.',
		276 Erythrospermum,
		277 'Erythroxylum_spp.',
		278 'Escallonia_spp.',
		279 Eschscholzia,
		280 Eucalyptus,
		281 Euclea_crispa,
		282 'Eucnide_spp.',
		283 Eucommia,
		284 Eucryphia,
		285 Euonymus,
		286 'Euphorbia_spp.',
		287 Euphronia,
		288 Eupomatia_bennettii,
		289 Euptelea_polyandra,
		290 'Eurya_spp.',
		291 Exacum_affine,
		292 Exbucklandia_populnea,
		293 Fagopyrum,
		294 'Fagus_spp.',
		295 Fauria,
		296 Fendlera_rupicola,
		297 'Ficus_spp.',
		298 Flacourtia,
		299 Flagellaria_indica,
		300 Floerkea_proserpinacoides,
		301 Forgesia,
		302 Forstera,
		303 'Fouquieria_spp.',
		304 Frankenia,
		305 Fuchsia_procumbens,
		306 Gaiadendron,
		307 'Galax_spp.',
		308 Galbulimima_belgraveana,
		309 Galearia,
		310 Galium,
		311 Garcinia,
		312 Garrya_elliptica,
		313 Geissoloma_marginatum,
		314 Gelsemium,
		315 'Gentiana_spp.',
		316 'Geranium_spp.',
		317 Gerbera,
		318 Gerrardina_foliosa,
		319 'Gilia_spp.',
		320 Ginkgo_biloba,
		321 Gisekia,
		322 Gladiolus_buckerveldii,
		323 Glaucidium_palmatum,
		324 Glycine_max,
		325 'Gnetum_spp.',
		326 Gomortega_keule,
		327 Gomphandra,
		328 Gonocaryum_litorale,
		329 Goodenia,
		330 Gossypium,
		331 Goupia,
		332 'Grevillea_spp.',
		333 Greyia_radlkoferi,
		334 'Griselinia_spp.',
		335 'Grubbia_spp.',
		336 Guaiacum,
		337 Guamatela_tuerckheimii,
		338 Guizotia,
		339 'Gunnera_spp.',
		340 'Gyrocarpus_spp.',
		341 'Gyrostemon_spp.',
		342 'Halesia_spp.',
		343 Halleria,
		344 Halophytum,
		345 'Haloragis_spp.',
		346 'Hamamelis_spp.',
		347 Hedera_helix,
		348 Hedycarya_arborea,
		349 Hedyosmum_arborescens,
		350 'Heisteria_spp.',
		351 Helianthemum,
		352 Helianthus_annuus,
		353 'Helwingia_spp.',
		354 Heptacodium,
		355 'Hernandia_spp.',
		356 Heteromorpha,
		357 Heteropyxis_natalensis,
		358 'Heuchera_spp.',
		359 Hevea,
		360 Heywoodia,
		361 Hibbertia,
		362 Hirtella,
		363 Homalanthus,
		364 Hordeum,
		365 Hortonia_floribunda,
		366 Houttuynia_cordata,
		367 Hua_gabonii,
		368 Hugonia,
		369 Humiria_balsaminifera,
		370 Humulus_lupulus,
		371 Hura,
		372 Hybanthus,
		373 'Hydnocarpus_spp.',
		374 'Hydrangea_spp.',
		375 Hydrastis_canadensis,
		376 'Hydrocharis_spp.',
		377 Hydrocotyle,
		378 Hydrolea_ovata,
		379 Hydrophyllum,
		380 'Hydrostachys_spp.',
		381 Hymenanthera,
		382 Hypecoum,
		383 Hypericum_perforatum,
		384 'Hypertelis_spp.',
		385 'Hypoxis_spp.',
		386 Icacina,
		387 Idesia,
		388 Idiospermum_australiense,
		389 'Ilex_spp.',
		390 'Illicium_spp.',
		391 'Impatiens_spp.',
		392 'Indigofera_spp.',
		393 'Ipomoea_spp.',
		394 Iris,
		395 'Irvingbaileya_spp.',
		396 Irvingia,
		397 Itea,
		398 Ixerba,
		399 Ixiolirion_tataricum,
		400 Japonolirion_osense,
		401 Jasminum,
		402 'Joinvillea_spp.',
		403 'Juglans_spp.',
		404 Juncus_effusus,
		405 Justicia_americana,
		406 Kadsura_japonica,
		407 Kalanchoe,
		408 Kiggelaria,
		409 Kingdonia_uniflora,
		410 Klainedoxa,
		411 Koeberlinia_spinosa,
		412 Kolkwitzia,
		413 Krameria_ixine,
		414 Lachnostylis,
		415 Lacistema_aggregatum,
		416 Lactoris_fernandeziana,
		417 Lactuca,
		418 'Lamium_spp.',
		419 Lampranthus,
		420 Lapageria_rosea,
		421 Lardizabala_biternata,
		422 Larrea_tridentata,
		423 Lasiocroton,
		424 Laurus_nobilis,
		425 Leea_guineensis,
		426 Lemna,
		427 Leonia,
		428 Lepidobotrys,
		429 Leycesteria,
		430 'Licania_spp.',
		431 'Lilium_spp.',
		432 Limeum,
		433 Limonium,
		434 Linnaea,
		435 Linum,
		436 Liquidambar_styraciflua,
		437 'Liriodendron_spp.',
		438 Lissocarpa_benthamii,
		439 'Lobelia_spp.',
		440 Lomandra,
		441 Lonicera,
		442 Lophopyxis,
		443 Lotus,
		444 Lozania,
		445 Luculia,
		446 Lunania,
		447 Luxemburgia,
		448 'Lythrum_spp.',
		449 Mackinlaya,
		450 Maesa,
		451 'Magnolia_spp.',
		452 'Mahonia_spp.',
		453 Malesherbia_linearifolia,
		454 Malpighia,
		455 Mammea,
		456 Manihot_esculenta,
		457 Manilkara_zapota,
		458 Maranta_bicolor,
		459 'Marathrum_spp.',
		460 'Marcgravia_spp.',
		461 Martynia,
		462 Mauloutchia_chapelieri,
		463 'Mayaca_spp.',
		464 Maytenus,
		465 'Mazus_spp.',
		466 'Medicago_spp.',
		467 Medusagyne_oppositifolia,
		468 'Melanophylla_spp.',
		469 Melianthus,
		470 Meliosma_veitchiorum,
		471 Menispermum,
		472 Mentzelia,
		473 Menyanthes_trifoliata,
		474 Mesua,
		475 Metanarthecium_luteoviride,
		476 Metasequoia,
		477 'Metrosideros_spp.',
		478 Micrantheum,
		479 Microdesmis,
		480 'Mimosa_spp.',
		481 Minquartia_guianensis,
		482 Mirabilis_jalapa,
		483 'Misodendrum_spp.',
		484 Mitchella_repens,
		485 Molineria_capitulata,
		486 Mollugo_verticillata,
		487 Montinia_caryophyllacea,
		488 Morella_cerifera,
		489 Morina,
		490 'Morus_spp.',
		491 Moschopsis,
		492 Moultonianthus,
		493 Mouriri_cyphocarpa,
		494 'Musa_spp.',
		495 Myodocarpus,
		496 Myoporum_mauritianum,
		497 Myrica,
		498 Myriophyllum,
		499 Myristica_fragrans,
		500 'Myrothamnus_spp.',
		501 Myrtus,
		502 'Najas_spp.',
		503 Nandina_domestica,
		504 Nardostachys,
		505 Nelumbo_lutea,
		506 Neoscortechinia_kingii,
		507 'Nepenthes_spp.',
		508 Nerium_oleander,
		509 Neurada_procumbens,
		510 'Nicotiana_spp.',
		511 Nitraria,
		512 'Nolana_spp.',
		513 Nothofagus_antarctica,
		514 'Nothoscordum_spp.',
		515 'Nuphar_spp.',
		516 'Nymphaea_spp.',
		517 Nymphoides,
		518 'Nyssa_spp.',
		519 Ochanostachys_amentacea,
		520 Ochna,
		521 Ochroma_pyramidale,
		522 Ochthocosmus,
		523 Oenothera,
		524 Olea_europaea,
		525 Olinia,
		526 Omphalea,
		527 Oncidium,
		528 Oncotheca,
		529 'Opilia_spp.',
		530 Opuntia,
		531 Orontium_aquaticum,
		532 Oryza_sativa,
		533 'Osyris_spp.',
		534 'Oxalis_spp.',
		535 'Pachysandra_spp.',
		536 Paeonia_californica,
		537 'Panax_spp.',
		538 Panda,
		539 Pangium,
		540 Paracryphia_alticola,
		541 Paradrypetes,
		542 'Parnassia_spp.',
		543 Paropsia,
		544 'Passiflora_spp.',
		545 Patrinia,
		546 Paulownia_tomentosa,
		547 Paxistima,
		548 'Pedicularis_spp.',
		549 Pelargonium_cotyledonis,
		550 Peltanthera,
		551 Pennantia_corymbosa,
		552 Pentadiplandra_brazzeana,
		553 Pentaphragma,
		554 Penthorum_sedoides,
		555 'Peperomia_spp.',
		556 Pera_bicolor,
		557 Pereskia_aculeata,
		558 Peridiscus_lucidus,
		559 Perrottetia_ovata,
		560 'Petalonyx_spp.',
		561 Petalostigma,
		562 Petrophile,
		563 'Petrosavia_spp.',
		564 'Petunia_spp.',
		565 Peumus_boldus,
		566 Phalaenopsis,
		567 Phaulothamnus,
		568 'Phelline_spp.',
		569 Phenakospermum_guyannense,
		570 'Philadelphus_spp.',
		571 Philesia_buxifolia,
		572 Philydrum_lanuginosum,
		573 'Phlox_spp.',
		574 Phoenix_dactylifera,
		575 'Photinia_spp.',
		576 Phryma,
		577 'Phyllanthus_spp.',
		578 'Phyllonoma_spp.',
		579 Physena,
		580 Phytolacca_americana,
		581 'Picramnia_spp.',
		582 'Pilea_spp.',
		583 Pimelodendron,
		584 Pinguicula,
		585 Pinus,
		586 'Piper_spp.',
		587 Pisum,
		588 Pittosporum,
		589 Plagiopteron,
		590 'Plantago_spp.',
		591 Platanus_occidentalis,
		592 Platysace,
		593 Platyspermation,
		594 Pleea_tenuifolia,
		595 Plocosperma_buxifolium,
		596 'Plumbago_spp.',
		597 Podocalyx,
		598 Podophyllum_peltatum,
		599 Podostemum_ceratophyllum,
		600 Pogonophora_schomburgkiana,
		601 Polemonium,
		602 Poliothyrsis,
		603 'Polygala_spp.',
		604 'Polygonum_spp.',
		605 'Polyosma_spp.',
		606 Polypremum_procumbens,
		607 Polyscias,
		608 Pontederia_cordata,
		609 'Populus_spp.',
		610 'Portulaca_spp.',
		611 'Potamogeton_spp.',
		612 Primula,
		613 Prockia,
		614 Prunus_persica,
		615 Pseudonemacladus,
		616 Pseudopanax,
		617 Pterocephalodes,
		618 Pterostemon_rotundifolius,
		619 Puya_raimondii,
		620 Qualea,
		621 'Quercus_spp.',
		622 Quiina,
		623 Quillaja_saponaria,
		624 Quintinia,
		625 'Ranunculus_spp.',
		626 Raphanus_sativus,
		627 Ravenala_madagascariensis,
		628 Reinwardtia_indica,
		629 Reseda,
		630 'Restio_spp.',
		631 'Rhabdodendron_spp.',
		632 Rhamnus,
		633 'Rhizophora_spp.',
		634 'Rhododendron_spp.',
		635 Rhodohypoxis_millioides,
		636 'Rhodoleia_spp.',
		637 'Rhus_spp.',
		638 'Rhynchoglossum_spp.',
		639 'Rhynchospora_spp.',
		640 Ribes_aureum,
		641 Ricinus,
		642 Rinorea_pubiflora,
		643 Rivina,
		644 Roridula_gorgonias,
		645 Roupala,
		646 Rourea_minor,
		647 Roussea_simplex,
		648 Ruptiliocarpon,
		649 Sabia,
		650 Saccharum,
		651 Sacoglottis,
		652 Salix,
		653 Sambucus,
		654 Sanicula,
		655 Santalum_album,
		656 'Sarcandra_spp.',
		657 Sarcobatus,
		658 Sargentodoxa,
		659 'Sarracenia_spp.',
		660 Saruma,
		661 'Sassafras_spp.',
		662 'Saururus_spp.',
		663 'Sauvagesia_spp.',
		664 Saxifraga,
		665 'Scabiosa_spp.',
		666 'Scaevola_spp.',
		667 Schefflera,
		668 Schinus,
		669 'Schisandra_spp.',
		670 Schoepfia_schreberi,
		671 'Schotia_spp.',
		672 'Scrophularia_spp.',
		673 Scyphostegia,
		674 'Sedum_spp.',
		675 Sesamum,
		676 Simmondsia_chinensis,
		677 Sinadoxa,
		678 'Siparuna_spp.',
		679 'Siphonodon_spp.',
		680 'Sloanea_spp.',
		681 Smilax_glauca,
		682 Solanum,
		683 Sollya_heterophylla,
		684 'Soyauxia_spp.',
		685 Sparganium,
		686 Spathiostemon,
		687 'Spathiphyllum_spp.',
		688 Sphenoclea,
		689 Sphenostemon,
		690 'Spigelia_spp.',
		691 Spinacia,
		692 'Spiraea_spp.',
		693 Stachyurus,
		694 'Stackhousia_spp.',
		695 'Staphylea_spp.',
		696 Stegnosperma,
		697 Stegolepis,
		698 'Stellaria_spp.',
		699 'Sterculia_spp.',
		700 'Strasburgeria_spp.',
		701 Strelitzia,
		702 Strychnos,
		703 Stylidium,
		704 Stylobasium_spathulatum,
		705 'Styrax_spp.',
		706 Sullivantia_oregana,
		707 Suregada,
		708 Swietenia_macrophylla,
		709 Symphonia_tanalensis,
		710 Symphoricarpos,
		711 'Symplocos_spp.',
		712 Syringa,
		713 'Tacca_spp.',
		714 Tagetes,
		715 Takhtajania_perrieri,
		716 Talinum,
		717 'Tamarix_spp.',
		718 Tapiscia_sinensis,
		719 Tapura,
		720 'Tasmannia_spp.',
		721 Tecophilaea_cyanocrocus,
		722 'Terminalia_spp.',
		723 'Ternstroemia_spp.',
		724 Tetracarpaea_tasmanica,
		725 Tetracentron_sinense,
		726 Tetracera_asiatica,
		727 Tetracoccus,
		728 Tetradoxa,
		729 Tetrameles_nudiflora,
		730 'Tetramerista_spp.',
		731 Tetrapanax,
		732 Tetraplasandra,
		733 Tetrapterys_glabrifolia,
		734 Tetrorchidium,
		735 Thomandersia,
		736 Thottea_tomentosa,
		737 Thryallis,
		738 'Thunbergia_spp.',
		739 Thymelaea_hirsuta,
		740 Tinospora,
		741 Titanotrichum_oldhamii,
		742 Tofieldia_calyculata,
		743 Torricellia,
		744 Touroulia,
		745 Tovaria_pendula,
		746 Trachelium,
		747 Trachycarpus_fortunei,
		748 'Tradescantia_spp.',
		749 Tragopogon_dubius,
		750 Trichilia_emetica,
		751 Triglochin_maritima,
		752 Trigonia,
		753 Trigonostemon,
		754 'Trillium_spp.',
		755 Trimenia_moorei,
		756 Triosteum,
		757 Triphyophyllum_peltatum,
		758 Triplostegia,
		759 Tripterygium,
		760 Trithuria_submersa,
		761 Trochodendron_aralioides,
		762 'Tropaeolum_spp.',
		763 'Turnera_spp.',
		764 'Typha_spp.',
		765 Urtica,
		766 'Utricularia_spp.',
		767 'Vaccinium_spp.',
		768 Vahlia_capensis,
		769 Valdivia,
		770 'Valeriana_spp.',
		771 Valerianella,
		772 Vantanea,
		773 Verbascum_thapsus,
		774 'Verbena_spp.',
		775 'Veronica_spp.',
		776 'Viburnum_spp.',
		777 Villarsia,
		778 'Viola_spp.',
		779 'Vismia_spp.',
		780 'Vitis_spp.',
		781 Viviania_marifolia,
		782 'Vochysia_spp.',
		783 Vriesea,
		784 Weigela,
		785 Welwitschia,
		786 Wittsteinia,
		787 Xanthorhiza_simplicissima,
		788 Xanthorrhoea,
		789 Xanthosoma,
		790 'Xerophyta_spp.',
		791 Xerosicyos_danguyi,
		792 Ximenia_americana,
		793 'Xyris_spp.',
		794 Yucca,
		795 Zabelia,
		796 Zea,
		797 'Zelkova_spp.',
		798 'Zingiber_spp.'
		;
tree TREE1 = [&R] (((325[&length_range={124.5161530391,242.3480141737},nu.rate_range={5.368026994878323E-4,0.0017861950257445816},cp.rate=0.0016853184217940223,length_95%_HPD={133.9462249332,234.1302037026},length=172.71838750733542,height_median=4.00001201228406E-6,height_range={3.999881528216065E-6,4.000141984761285E-6},nu.rate_median=0.0010534372403419746,cp.rate_range={0.001036654679940224,0.…
End;
